# Supplementary material for: Metabolomics Reveals Antioxidant Metabolites in Colored Rice Grains
Source: MDPI journal article supplement (doi:10.3390/metabo14020120), 2024-02-11
Supplement: s1 [file s1]

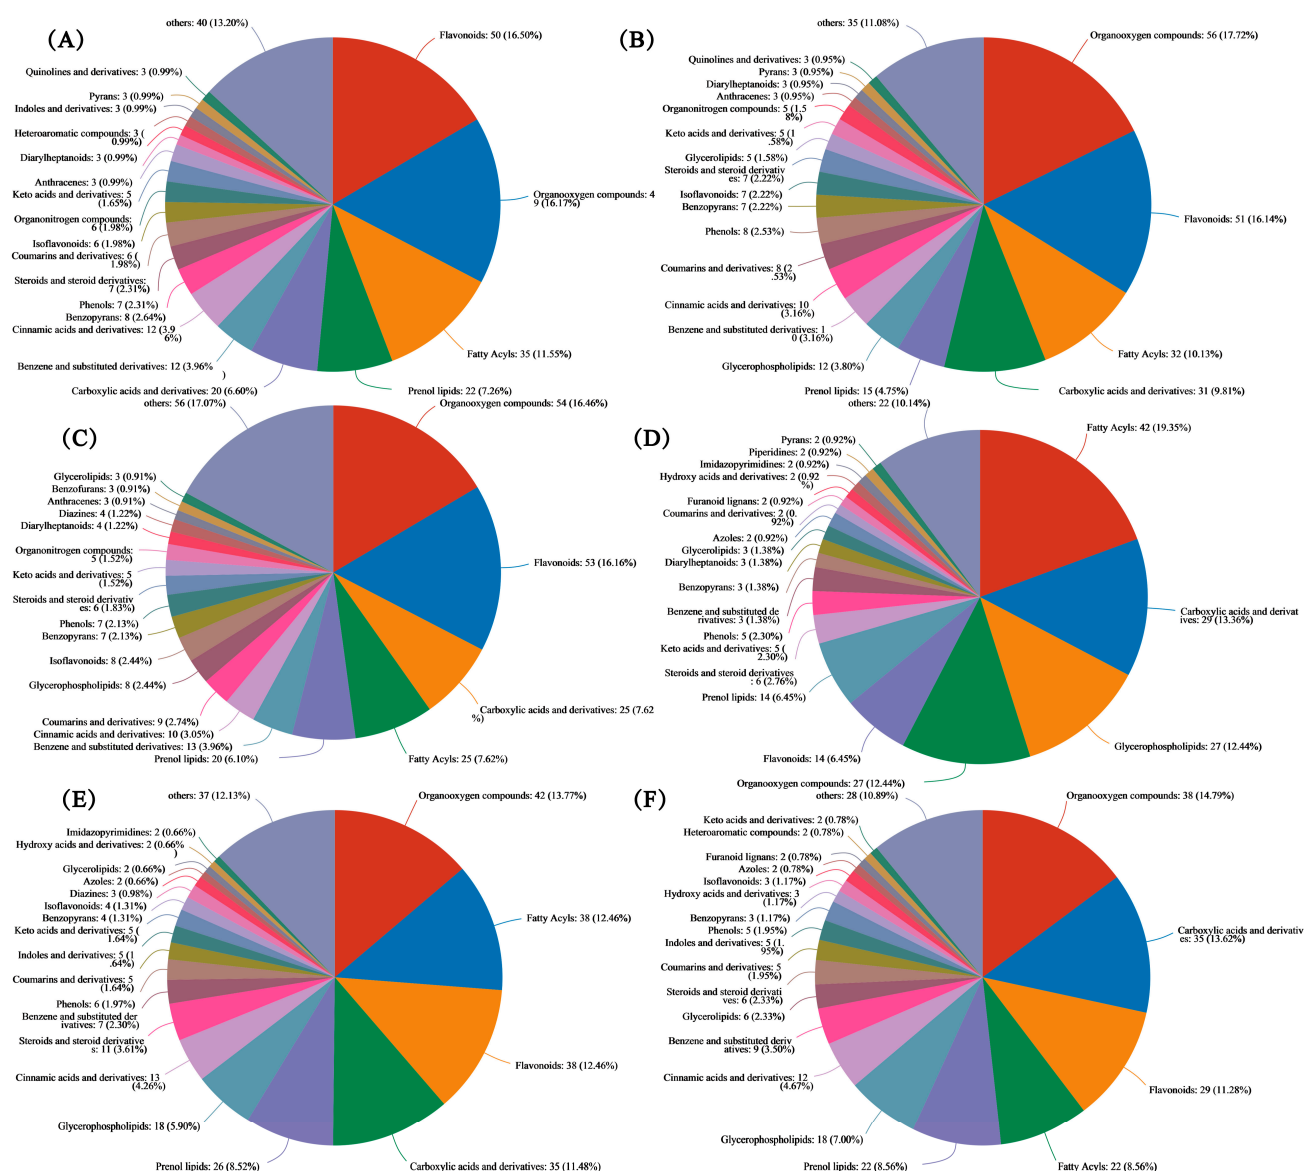

**Figure S2.** Statistical map of compounds. The name and percentage of the metabolites in the selected HMDB hierarchy (Class) are displayed in a high to low order, depending on the number of metabolites. The different colours in each pie plot in the figure represent a different HMDB classification, the area of which represents the relative proportion of the metabolites in that classification. **(A)** YZ6H and YJN818, **(B)** YZ6H and HN, **(C)** YZ6H and YCN1H, **(D)** YJN818 and HN, **(E)** YJN818 and YCN1H, **(F)** HN and YCN1H
