# Supplementary material for: Metabolomics Reveals Antioxidant Metabolites in Colored Rice Grains
Source: MDPI journal article supplement (doi:10.3390/metabo14020120), 2024-02-11
Supplement: s1 [file s1]

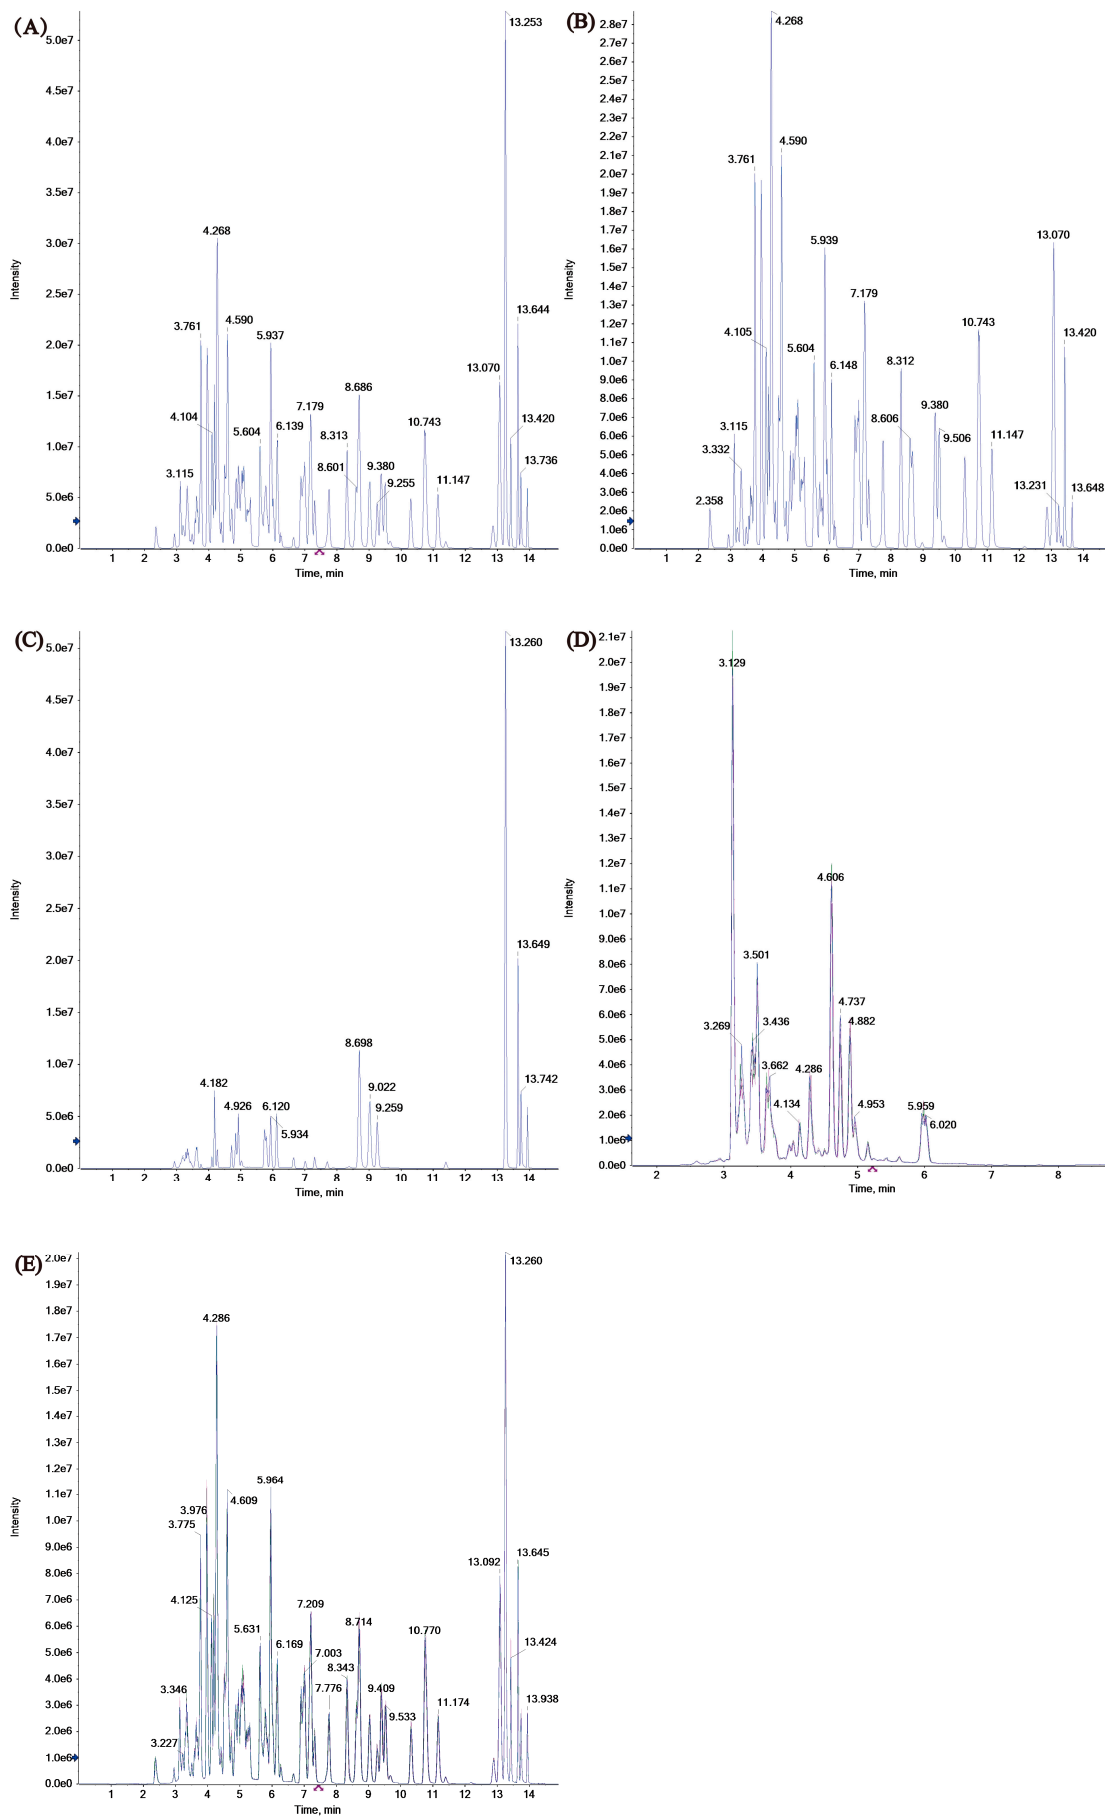

**Figure S1.** Ion current diagram. **(A)** Total ion current diagram (standard), **(B)** Extraction of negative ion current diagram, **(C)** Extraction of positive ion current diagram, **(D)** Total ion current diagram (QC sample superposition), **(E)** Total ion current diagram (standard superposition).
