# Supplementary material for: Metabolomics Reveals Antioxidant Metabolites in Colored Rice Grains
Source: MDPI journal article supplement (doi:10.3390/metabo14020120), 2024-02-11
Supplement: s1 [file s1]

**Table S2.** The linear equations for the flavonoids and phenolic compounds.

| Metabolites                      | Retention time | limit of detection | limit of quantitation | Standard curves                                                       | RSD (%) |
|----------------------------------|----------------|--------------------|-----------------------|-----------------------------------------------------------------------|---------|
| 2,4-Dihydroxybenzoic acid        | 4.28           | 4.27               | 4.27                  | $y = 1.66737e5 x + 5.30965e5$ ( $r = 0.99751$ , $r^2 = 0.99503$ )     | 1.76    |
| 2,6-Dihydroxybenzoic acid        | 4.28           | 0.14               | 0.14                  | $y = 8.86564e4 x + 6476.54125$ ( $r = 0.99969$ , $r^2 = 0.99939$ )    | 3.32    |
| 3,4-Dihydroxybenzaldehyde        | 3.68           | 0.69               | 0.69                  | $y = 22116.62642 x + 1050.00105$ ( $r = 0.99923$ , $r^2 = 0.99846$ )  | 7.62    |
| 4-Hydroxybenzoic acid            | 3.75           | 1.56               | 1.90                  | $y = 3.88878e4 x + -11616.14538$ ( $r = 0.99960$ , $r^2 = 0.99920$ )  | 7.81    |
| 4-Hydroxycinnamic acid           | 4.59           | 0.12               | 0.77                  | $y = 9.73960e4 x + 3.26284e4$ ( $r = 0.99940$ , $r^2 = 0.99879$ )     | 5.35    |
| Apiin                            | 4.93           | 0.04               | 0.04                  | $y = 27062.60184 x + 1005.19708$ ( $r = 0.99730$ , $r^2 = 0.99461$ )  | 3.91    |
| Aromadendrin                     | 5.85           | 0.26               | 0.26                  | $y = 4.73204e4 x + -214.31868$ ( $r = 0.99952$ , $r^2 = 0.99903$ )    | 4.59    |
| Caffeic acid                     | 3.96           | 1.30               | 2.10                  | $y = 26134.20850 x + -3.03375e4$ ( $r = 0.99590$ , $r^2 = 0.99181$ )  | 15.71   |
| Caftaric acid                    | 3.24           | 0.38               | 0.97                  | $y = 7984.42499 x + -1080.86629$ ( $r = 0.99809$ , $r^2 = 0.99618$ )  | 3.55    |
| Catechin                         | 3.63           | 1.21               | 0.32                  | $y = 4196.27171 x + -2962.01711$ ( $r = 0.99873$ , $r^2 = 0.99745$ )  | 5.85    |
| Chlorogenic acid                 | 3.58           | 0.28               | 0.28                  | $y = 24371.86981 x + -3680.26502$ ( $r = 0.99975$ , $r^2 = 0.99950$ ) | 3.09    |
| Coniferaldehyde                  | 5.75           | 0.20               | 0.71                  | $y = 3.57501e4 x + 6488.86865$ ( $r = 0.99881$ , $r^2 = 0.99761$ )    | 2.85    |
| Cosmosiin                        | 5.20           | 0.12               | 0.27                  | $y = 22223.67911 x + 315.82508$ ( $r = 0.99901$ , $r^2 = 0.99803$ )   | 6.24    |
| Cyanidin 3-O-rutinoside chloride | 3.44           | 0.23               | 0.90                  | $y = 14926.94965 x + 3174.56338$ ( $r = 0.99990$ , $r^2 = 0.99981$ )  | 9.44    |
| Epicatechin                      | 3.97           | 4.41               | 4.41                  | $y = 1959.21571 x + 6949.77109$ ( $r = 0.99695$ , $r^2 = 0.99390$ )   | 6.71    |
| Eriodictyol                      | 6.95           | 0.29               | 0.12                  | $y = 5.40788e4 x + 2823.21028$ ( $r = 0.99952$ , $r^2 = 0.99903$ )    | 2.06    |
| Ferulic acid                     | 4.88           | 0.37               | 0.37                  | $y = 25482.04665 x + 2749.52295$ ( $r = 0.99945$ , $r^2 = 0.99891$ )  | 2.44    |
| Gallic acid                      | 2.39           | 0.36               | 0.68                  | $y = 3.79671e4 x + 2229.43613$ ( $r = 0.99911$ , $r^2 = 0.99822$ )    | 0.72    |
| Gentisic acid                    | 3.77           | 2.29               | 2.29                  | $y = 17580.23138 x + 25022.93985$ ( $r = 0.99953$ , $r^2 = 0.99906$ ) | 2.17    |
| Hesperidin                       | 5.21           | 0.05               | 0.05                  | $y = 22005.34237 x + 1131.80631$ ( $r = 0.99969$ , $r^2 = 0.99939$ )  | 4.29    |

|                            |      |      |      |                                                                  |       |
|----------------------------|------|------|------|------------------------------------------------------------------|-------|
| Isoorientin                | 4.13 | 0.17 | 0.31 | $y = 18849.93508x + 162.14385$ ( $r = 0.99947, r^2 = 0.99895$ )  | 13.67 |
| Isorhamnetin               | 9.39 | 0.04 | 0.06 | $y = 1.51689e5x - 855.62356$ ( $r = 0.99987, r^2 = 0.99975$ )    | 2.66  |
| Isorhamnetin-3-O-glucoside | 5.14 | 0.02 | 0.06 | $y = 4.16905e4x + 633.48862$ ( $r = 0.99963, r^2 = 0.99925$ )    | 2.55  |
| Methyl gallate             | 3.77 | 0.01 | 0.05 | $y = 9.68578e4x + 797.63243$ ( $r = 0.99903, r^2 = 0.99807$ )    | 9.56  |
| Morin                      | 7.20 | 0.05 | 0.05 | $y = 9.51372e4x - 225.47030$ ( $r = 0.99994, r^2 = 0.99987$ )    | 3.72  |
| Myricetin 3-galactoside    | 4.19 | 0.09 | 0.30 | $y = 4.30538e4x - 2095.68184$ ( $r = 0.99857, r^2 = 0.99714$ )   | 12.18 |
| Narcissin                  | 4.83 | 0.06 | 0.81 | $y = 23437.80544x + 6991.94109$ ( $r = 0.99607, r^2 = 0.99215$ ) | 2.11  |
| Naringenin                 | 8.57 | 0.04 | 0.13 | $y = 14751.12788x + 156.86294$ ( $r = 0.99939, r^2 = 0.99878$ )  | 2.91  |
| Naringin                   | 5.02 | 0.77 | 0.77 | $y = 10536.68448x + 3429.94710$ ( $r = 0.99924, r^2 = 0.99847$ ) | 7.99  |
| Nicotiflorin               | 4.74 | 0.06 | 0.13 | $y = 26923.85137x - 297.35940$ ( $r = 0.99926, r^2 = 0.99852$ )  | 6.39  |
| Orientin                   | 4.13 | 0.17 | 0.12 | $y = 17897.20754x - 198.05497$ ( $r = 0.99836, r^2 = 0.99673$ )  | 8.87  |
| Pelargonidin-3-glucoside   | 3.63 | 0.34 | 1.95 | $y = 5.01874e4x + 29657.21309$ ( $r = 0.99962, r^2 = 0.99923$ )  | 7.46  |
| Phloretin                  | 8.61 | 0.11 | 0.11 | $y = 8.49143e4x + 1171.43150$ ( $r = 0.99972, r^2 = 0.99944$ )   | 2.42  |
| Phlorizin                  | 5.61 | 0.03 | 0.04 | $y = 4.76082e4x + 48.26600$ ( $r = 0.99993, r^2 = 0.99985$ )     | 4.92  |
| Procyanidin B3             | 3.50 | 0.48 | 1.99 | $y = 2672.61615x - 882.49941$ ( $r = 0.99814, r^2 = 0.99627$ )   | 6.76  |
| Protocatechuic acid        | 3.13 | 0.34 | 0.66 | $y = 3.91198e4x + 8202.36981$ ( $r = 0.99962, r^2 = 0.99923$ )   | 1.60  |
| Prunin                     | 5.25 | 0.02 | 0.05 | $y = 3.93228e4x + 785.47821$ ( $r = 0.99969, r^2 = 0.99939$ )    | 1.53  |
| Quercetin 3-galactoside    | 4.55 | 0.19 | 0.34 | $y = 19740.06507x - 2053.94721$ ( $r = 0.99842, r^2 = 0.99684$ ) | 4.50  |
| Quercetin                  | 4.55 | 0.19 | 0.04 | $y = 8.82925e4x + 1234.95714$ ( $r = 0.99969, r^2 = 0.99938$ )   | 2.17  |
| Rutin                      | 4.41 | 0.20 | 0.90 | $y = 16280.02981x + 403.51215$ ( $r = 0.99540, r^2 = 0.99083$ )  | 9.51  |
| Salicylic acid             | 6.01 | 0.01 | 0.74 | $y = 6.48909e4x + 21122.80594$ ( $r = 0.99885, r^2 = 0.99769$ )  | 2.71  |
| Sinapic acid               | 4.86 | 0.04 | 0.04 | $y = 17731.96607x + 180.36652$ ( $r = 0.99911, r^2 = 0.99823$ )  | 5.32  |

|                                               |      |      |      |                                                                         |      |
|-----------------------------------------------|------|------|------|-------------------------------------------------------------------------|------|
| Syringaldehyde                                | 4.86 | 0.79 | 0.79 | $y = 19987.05676 x + 5280.46714$<br>( $r = 0.99845$ , $r^2 = 0.99691$ ) | 5.83 |
| Syringic acid                                 | 4.11 | 1.57 | 1.86 | $y = 7278.24918 x + -1701.88282$ ( $r = 0.99568$ , $r^2 = 0.99137$ )    | 9.31 |
| Taxifolin                                     | 4.94 | 0.18 | 0.28 | $y = 20378.10557 x + 1358.56780$<br>( $r = 0.99952$ , $r^2 = 0.99904$ ) | 0.76 |
| trans-3,3',4',5,5',7-H<br>exahydroxyflavanone | 4.18 | 0.12 | 0.12 | $y = 25468.90594 x + 2161.50341$<br>( $r = 0.99914$ , $r^2 = 0.99828$ ) | 3.02 |
| trans-Cinnamic acid                           | 7.70 | 0.91 | 0.91 | $y = 12408.26702 x + 6154.59698$<br>( $r = 0.99995$ , $r^2 = 0.99990$ ) | 2.89 |
| trans-Piceid                                  | 4.55 | 0.28 | 0.28 | $y = 22325.86508 x + 2290.94663$<br>( $r = 0.99607$ , $r^2 = 0.99216$ ) | 4.68 |
| Trilobatin                                    | 6.16 | 0.02 | 0.02 | $y = 4.10956e4 x + 398.33363$ ( $r = 0.99980$ , $r^2 = 0.99961$ )       | 5.11 |
| Vanillic acid                                 | 4.03 | 0.81 | 4.84 | $y = 1714.08337 x + 3980.22011$ ( $r = 0.99783$ , $r^2 = 0.99566$ )     | 4.86 |
| Vitexin                                       | 4.50 | 0.02 | 0.05 | $y = 6.32078e4 x + -136.09591$ ( $r = 0.99910$ , $r^2 = 0.99820$ )      | 6.80 |
