# Supplementary material for: Metabolomics Reveals Antioxidant Metabolites in Colored Rice Grains
Source: MDPI journal article supplement (doi:10.3390/metabo14020120), 2024-02-11
Supplement: s1 [file s1]

**Table S1.** Standard information of flavonoids and phenolic compounds.

| Name                              | Chemical formula | Molecular weight | Classification           | Purity       |
|-----------------------------------|------------------|------------------|--------------------------|--------------|
| (-)-Catechin 3-O-gallate          | C22H18O10        | 442.09           | Flavanols                | HPLC, ≥98%   |
| (-)-Epicatechin 3-O-gallate       | C22H18O10        | 442.09           | Flavanols                | HPLC, ≥98%   |
| (-)-Epigallocatechin              | C15H14O7         | 306.07           | Flavanols                | HPLC, ≥98%   |
| (-)-Gallocatechin gallate         | C22H18O11        | 458.08           | Flavanols                | HPLC, ≥98%   |
| (+/-)Catechin                     | C15H14O6         | 290.08           | Flavanols                | HPLC, ≥98%   |
| (±)-Gallocatechin                 | C15H14O7         | 306.07           | Flavanols                | HPLC, ≥98%   |
| (2S)-Liquiritigenin               | C15H12O4         | 256.07           | Flavanones               | HPLC, ≥98%   |
| (S)-Pinocembrin                   | C15H12O4         | 256.07           | Flavanones               | HPLC, ≥98%   |
| 1,5-Dicaffeoylquinic acid         | C25H24O12        | 516.13           | Alcohols and polyols     | HPLC, ≥99%   |
| 2,4-Dihydroxybenzoic acid         | C7H6O4           | 154.03           | Benzoic acid derivatives | HPLC, ≥98%   |
| 2,6-Dihydroxybenzoic acid         | C7H6O4           | 154.03           | Benzoic acid derivatives | HPLC, ≥98%   |
| 3,3',4'5-Tetrahydroxystilbene     | C14H12O4         | 244.07           | Stilbenes                | HPLC, ≥98%   |
| 3,4-Dihydro-2H-1-benzopyran-2-one | C9H8O2           | 148.05           | Coumarins                | HPLC, ≥98%   |
| 3,4-Dihydroxybenzaldehyde         | C7H6O3           | 138.03           | Catechols                | HPLC, ≥98%   |
| 3-Hydroxybenzaldehyde             | C7H6O2           | 122.04           | Benzaldehydes            | HPLC, ≥95%   |
| 3-Hydroxyflavone                  | C15H10O3         | 238.06           | Flavonols                | HPLC, ≥98%   |
| 4',7-Di-O-methylnaringenin        | C17H16O5         | 300.10           | Flavanones               | HPLC, ≥98%   |
| 4-Coumaryl alcohol                | C9H10O2          | 150.07           | Coumarins                | HPLC, ≥99%   |
| 4-Hydroxybenzoic acid             | C7H6O3           | 138.03           | Benzoic acid derivatives | HPLC, ≥98%   |
| 4-Hydroxycinnamic acid            | C9H8O3           | 164.05           | Phenylpropanoids         | HPLC, ≥98%   |
| 4-Methylumbelliferone             | C10H8O3          | 176.05           | Coumarins                | HPLC, ≥98%   |
| 6-Hydroxydaidzein                 | C15H10O5         | 270.05           | Isoflavones              | HPLC, ≥98%   |
| 6-Methoxyflavone                  | C16H12O3         | 252.08           | Flavanones               | HPLC, ≥99.5% |
| 6-Methylcoumarin                  | C10H8O2          | 160.05           | Coumarins                | HPLC, ≥98%   |
| Acetovanillone                    | C9H10O3          | 166.06           | Acetophenones            | HPLC, ≥98%   |
| Aesculetin                        | C9H6O4           | 178.03           | Coumarins                | HPLC, ≥98%   |
| Aesculin                          | C15H16O9         | 340.08           | Coumarins                | HPLC, ≥98%   |
| Afzelin                           | C21H20O10        | 432.11           | Flavonols                | HPLC, ≥98%   |
| Amentoflavone                     | C30H18O10        | 538.09           | Flavones                 | HPLC, ≥98%   |
| Apigenin                          | C15H10O5         | 270.05           | Flavones                 | HPLC, ≥98%   |
| Apigenin                          | C21H20O9         | 416.11           | Flavonols                | HPLC, ≥98%   |
| 4'-O-rhamnoside                   |                  |                  |                          |              |
| Apiin                             | C26H28O14        | 564.15           | Flavones                 | HPLC, ≥98%   |
| Aromadendrin                      | C15H12O6         | 288.06           | Flavanonols              | HPLC, ≥98%   |

|                                     |                 |        |                          |           |
|-------------------------------------|-----------------|--------|--------------------------|-----------|
| Astragalin                          | C21H20O11       | 448.10 | Flavonols                | HPLC,≥98% |
| Avicularin                          | C20H18O11       | 434.08 | Flavonols                | HPLC,≥98% |
| Baicalein                           | C15H10O5        | 270.05 | Flavones                 | HPLC,≥98% |
| Biochanin A                         | C16H12O5        | 284.07 | Isoflavones              | HPLC,≥98% |
| Butein                              | C15H12O5        | 272.07 | Chalcones                | HPLC,≥98% |
| Caffeic acid                        | C9H8O4          | 180.04 | Phenylpropanoids         | HPLC,≥98% |
| Caftaric acid                       | C13H12O9        | 312.05 | Phenylpropanoids         | HPLC,≥98% |
| Calycosin                           | C16H12O5        | 284.07 | Isoflavones              | HPLC,≥98% |
| Chlorogenic acid                    | C16H18O9        | 354.10 | Alcohols and polyols     | HPLC,≥98% |
| Chrysin                             | C15H10O4        | 254.06 | Flavones                 | HPLC,≥98% |
| Coniferaldehyde                     | C10H10O3        | 178.06 | Aldehydes                | HPLC,≥98% |
| Cosmosiin                           | C21H20O10       | 432.11 | Flavones                 | HPLC,≥98% |
| Cryptochlorogenic acid              | C16H18O9        | 354.10 | Alcohols and polyols     | HPLC,≥98% |
| Cucurbitacin I                      | C30H42O7        | 514.29 | Terpenoids               | HPLC,≥98% |
| Cyanidin 3-O-rutinoside<br>chloride | C27H31ClO1<br>5 | 630.14 | Anthocyanins             | HPLC,≥95% |
| Cyanin chloride                     | C27H31ClO1<br>6 | 646.13 | Anthocyanins             | HPLC,≥95% |
| Daidzein                            | C15H10O4        | 254.06 | Isoflavones              | HPLC,≥98% |
| Daidzin                             | C21H20O9        | 416.11 | Isoflavones              | HPLC,≥98% |
| Daphnetin                           | C9H6O4          | 178.03 | Coumarins                | HPLC,≥98% |
| Delphinidin 3-glucoside             | C21H21O12       | 465.10 | Anthocyanins             | HPLC,≥95% |
| Diosmin                             | C28H32O15       | 608.17 | Flavones                 | HPLC,≥95% |
| Ellagic acid                        | C14H6O8         | 302.01 | Benzoic acid derivatives | HPLC,≥98% |
| Epicatechin                         | C15H14O6        | 290.08 | Flavanols                | HPLC,≥98% |
| Epigallocatechin gallate            | C22H18O11       | 458.08 | Flavanols                | HPLC,≥98% |
| Eriodictyol                         | C15H12O6        | 288.06 | Flavanones               | HPLC,≥98% |
| Ferulic acid                        | C10H10O4        | 194.06 | Phenylpropanoids         | HPLC,≥98% |
| Formononetin                        | C16H12O4        | 268.07 | Isoflavones              | HPLC,≥98% |
| Fraxetin                            | C10H8O5         | 208.04 | Coumarins                | HPLC,≥98% |
| Fraxin                              | C16H18O10       | 370.09 | Coumarins                | HPLC,≥98% |
| Galangin                            | C15H10O5        | 270.05 | Flavones                 | HPLC,≥98% |
| Gallic acid                         | C7H6O5          | 170.02 | Benzoic acid derivatives | HPLC,≥98% |
| Genistein                           | C15H10O5        | 270.05 | Isoflavones              | HPLC,≥98% |
| Gentisic acid                       | C7H6O4          | 154.03 | Benzoic acid derivatives | HPLC,≥98% |
| Glycitein                           | C16H12O5        | 284.07 | Isoflavones              | HPLC,≥98% |
| Hesperetin                          | C16H14O6        | 302.08 | Flavanones               | HPLC,≥98% |
| Hesperidin                          | C28H34O15       | 610.19 | Flavanones               | HPLC,≥98% |
| Isoliquiritigenin                   | C15H12O4        | 256.07 | Chalcones                | HPLC,≥98% |
| Isoorientin                         | C21H20O11       | 448.10 | Flavones                 | HPLC,≥98% |
| Isorhamnetin                        | C16H12O7        | 316.06 | Flavonols                | HPLC,≥98% |
| Isorhamnetin-3-O-glucos<br>ide      | C22H22O12       | 478.11 | Flavonols                | HPLC,≥98% |
| Isosakuranetin                      | C16H14O5        | 286.08 | Flavanones               | HPLC,≥98% |

|                           |             |        |                          |           |
|---------------------------|-------------|--------|--------------------------|-----------|
| Jaceosidin                | C17H14O7    | 330.07 | Isoflavones              | HPLC,≥98% |
| Kaempferol                | C15H10O6    | 286.05 | Flavonols                | HPLC,≥98% |
| Lcariin                   | C33H40O15   | 676.24 | Flavonols                | HPLC,≥98% |
| Limonin                   | C26H30O8    | 470.19 | Terpenoids               | HPLC,≥98% |
| Luteolin                  | C15H10O6    | 286.05 | Flavones                 | HPLC,≥98% |
| Malvin                    | C29H35O17   | 655.19 | Anthocyanins             | HPLC,≥95% |
| m-Coumaric acid           | C9H8O3      | 164.05 | Phenylpropanoids         | HPLC,≥98% |
| Methyl gallate            | C8H8O5      | 184.04 | Benzoic acid derivatives | HPLC,≥98% |
| Morin                     | C15H10O7    | 302.04 | Flavonols                | HPLC,≥98% |
| Myricetin                 | C15H10O8    | 318.04 | Flavonols                | HPLC,≥98% |
| Myricetin 3-galactoside   | C21H20O13   | 480.09 | Flavonols                | HPLC,≥98% |
| Myricitrin                | C21H20O12   | 464.10 | Flavonols                | HPLC,≥98% |
| Narcissin                 | C28H32O16   | 624.17 | Flavonols                | HPLC,≥98% |
| Naringenin                | C15H12O5    | 272.07 | Flavanones               | HPLC,≥98% |
| Naringin                  | C27H32O14   | 580.18 | Flavanones               | HPLC,≥98% |
| Nicotiflorin              | C27H30O15   | 594.16 | Flavonols                | HPLC,≥98% |
| Nobiletin                 | C21H22O8    | 402.13 | Flavones                 | HPLC,≥98% |
| Ononin                    | C22H22O9    | 430.13 | Isoflavones              | HPLC,≥98% |
| Orientin                  | C21H20O11   | 448.10 | Flavones                 | HPLC,≥98% |
| Pelargonidin-3-glucoside  | C21H21ClO10 | 468.08 | Anthocyanins             | HPLC,≥95% |
| Perillyl Alcohol          | C10H16O     | 152.12 | Terpenoids               | HPLC,≥98% |
| Phloretin                 | C15H14O5    | 274.08 | Dihydrochalcones         | HPLC,≥98% |
| Phlorizin                 | C21H24O10   | 436.14 | Dihydrochalcones         | HPLC,≥98% |
| Proanthocyanidin A2       | C30H24O12   | 576.13 | Proanthocyanidins        | HPLC,≥98% |
| Procyanidin B1            | C30H26O12   | 578.14 | Proanthocyanidins        | HPLC,≥95% |
| Procyanidin B2            | C30H26O12   | 578.14 | Proanthocyanidins        | HPLC,≥98% |
| Procyanidin B3            | C30H26O12   | 578.14 | Proanthocyanidins        | HPLC,≥98% |
| Protocatechuic acid       | C7H6O4      | 154.03 | Benzoic acid derivatives | HPLC,≥98% |
| Prunin                    | C21H22O10   | 434.12 | Flavonols                | HPLC,≥98% |
| Psoralen                  | C11H6O3     | 186.03 | Coumarins                | HPLC,≥98% |
| Pterostilbene             | C16H16O3    | 256.11 | Stilbenes                | HPLC,≥98% |
| Quercetin                 | C15H10O7    | 302.04 | Flavonols                | HPLC,≥98% |
| Quercetin 3-galactoside   | C21H20O12   | 464.10 | Flavonols                | HPLC,≥98% |
| Quercetin 3-O-glucuronide | C21H18O13   | 478.07 | Flavonols                | HPLC,≥95% |
| Quercitrin                | C21H20O11   | 448.10 | Flavonols                | HPLC,≥98% |
| Resveratrol               | C14H12O3    | 228.08 | Stilbenes                | HPLC,≥98% |
| Rhamnetin                 | C16H12O7    | 316.06 | Flavonols                | HPLC,≥98% |
| Rutin                     | C27H30O16   | 610.15 | Flavonols                | HPLC,≥98% |
| Sakuranetin               | C16H14O5    | 286.08 | Flavanones               | HPLC,≥98% |
| Salicin                   | C13H18O7    | 286.11 | Benzyl alcohols          | HPLC,≥98% |
| Salicylic acid            | C7H6O3      | 138.03 | Benzoic acid derivatives | HPLC,≥98% |
| Scopoletin                | C10H8O4     | 192.04 | Coumarins                | HPLC,≥99% |

|                                           |           |        |                          |           |
|-------------------------------------------|-----------|--------|--------------------------|-----------|
| Sinapaldehyde                             | C11H12O4  | 208.07 | Aldehydes                | HPLC,≥95% |
| Sinapic acid                              | C11H12O   | 224.07 | Phenylpropanoids         | HPLC,≥98% |
| Syringaldehyde                            | C9H10O4   | 182.06 | Benzaldehydes            | HPLC,≥98% |
| Syringic acid                             | C9H10O5   | 198.05 | Benzoic acid derivatives | HPLC,≥99% |
| Taxifolin                                 | C15H12O7  | 304.06 | Flavanonols              | HPLC,≥98% |
| trans-3,3',4',5,5',7-Hexahydroxyflavanone | C15H12O8  | 320.05 | Flavanonols              | HPLC,≥98% |
| trans-Cinnamic acid                       | C9H8O2    | 148.05 | Phenylpropanoids         | HPLC,≥98% |
| trans-Piceid                              | C20H22O8  | 390.13 | Stilbenes                | HPLC,≥98% |
| Trilobatin                                | C21H24O10 | 436.14 | Dihydrochalcones         | HPLC,≥98% |
| Umbelliferone                             | C9H6O3    | 162.03 | Coumarins                | HPLC,≥98% |
| Vanillic acid                             | C8H8O4    | 168.04 | Benzoic acid derivatives | HPLC,≥97% |
| Vanillin                                  | C8H8O3    | 152.05 | Benzaldehydes            | HPLC,≥98% |
| Vitexin                                   | C21H20O10 | 432.11 | Flavones                 | HPLC,≥98% |

---
