# Supplementary material for: Metabolomics Reveals Antioxidant Metabolites in Colored Rice Grains
Source: Metabolites. 2024 Feb 11;14(2):120. doi: 10.3390/metabo14020120 (PMC10891847; doi:10.3390/metabo14020120)
Supplement: Supplementary file 1 [file metabolites-14-00120-s001.zip › Table S3.xls]

## Sheet: Difference between groups
Table S3. DM information of YZ6H and YJN818 comparison groups
ID	Metabolite	Metab ID	Significant	Regulate	KEGG Compound ID	Mode	CAS ID	M/Z	Retention time	Adducts	Formula	Fragmentation Score	Theoretical Fragmentation Score	Library ID	KEGG Compound First Category	KEGG Compound Second Category	KEGG Pathway ID	KEGG Pathway First Category	KEGG Pathway Second Category	HMDB Superclass	HMDB Class	HMDB Subclass	Fragmentation Score	Theoretical Fragmentation Score	KEGG Pathway Description	KEGG Pathway Description	VIP_pred_OPLS-DA	VIP_PLS-DA	FC(YZ6H/YJN818)	P_value	FDR	YZ6H_1	YZ6H_2	YZ6H_3	YJN818_1	YJN818_2	YJN818_3
pos_1	All-trans-4-oxoretinoic acid	metab_0	yes	down	C16678	pos	38030-57-8;64907-22-8	315.195	6.29393	M+H, 2M+Na, M+K, M+Na, M+ACN+Na, M+NH4, M+H-H2O, M+H-2H2O	C20H26O3	48.1	-	LMPR01090026;HMDB0006280;HMDB0006285	-	-	map01100	Metabolism	Global and overview maps	Lipids and lipid-like molecules	Prenol lipids	Retinoids	48.1	-	Metabolic pathways	Metabolic pathways	1.5512	1.5443	0.8968	0.002175	0.01839	6.336	6.6234	6.316	7.2189	7.1738	7.0988
pos_5	15-deoxy-delta12,14-Prostaglandin A2	metab_4	yes	down	-	pos	-	299.2	5.99772	M+H, 2M+Na, M+K, M+Na, M+NH4, M+H-H2O, M+H-2H2O	C20H28O3	48.8	-	-	-	-	-	-	-	-	-	-	48.8	-	-	-	1.3353	1.3297	0.9085	0.03434	0.1109	6.1664	6.4704	5.9398	7.0544	6.6372	6.7555
pos_21	Citric acid	metab_20	yes	up	C00158	pos	77-92-9	215.016	1.24843	M+H-H2O, M+NH4, M+Na, M+H, M+H-2H2O	C6H8O7	83.7	-	PW_C000063;HMDB0000094	Organic acids	Carboxylic acids	map01100;map00630;map01110;map01240;map01210;map01200;map01230;map00250;map00020	Metabolism;Metabolism;Metabolism;Metabolism;Metabolism;Metabolism;Metabolism;Metabolism;Metabolism	Global and overview maps;Carbohydrate metabolism;Global and overview maps;Global and overview maps;Global and overview maps;Global and overview maps;Global and overview maps;Amino acid metabolism;Carbohydrate metabolism	Organic acids and derivatives	Carboxylic acids and derivatives	Tricarboxylic acids and derivatives	83.7	-	Metabolic pathways;Glyoxylate and dicarboxylate metabolism;Biosynthesis of secondary metabolites;Biosynthesis of cofactors;2-Oxocarboxylic acid metabolism;Carbon metabolism;Biosynthesis of amino acids;Alanine, aspartate and glutamate metabolism;Citrate cycle (TCA cycle)	Metabolic pathways;Glyoxylate and dicarboxylate metabolism;Biosynthesis of secondary metabolites;Biosynthesis of cofactors;2-Oxocarboxylic acid metabolism;Carbon metabolism;Biosynthesis of amino acids;Alanine, aspartate and glutamate metabolism;Citrate cycle (TCA cycle)	1.366	1.3605	1.1188	0.0009553	0.011	5.4384	5.2817	5.2716	4.8368	4.7342	4.7239
pos_48	NORCANTHARIDIN	metab_47	yes	up	-	pos	-	151.039	1.83447	M+H, 2M+NH4, M+H-H2O, M+CH3OH+H	C8H8O4	49.9	-	-	-	-	-	-	-	-	-	-	49.9	-	-	-	1.5043	1.5015	1.1586	1.859e-05	0.0009142	4.9145	4.9655	4.892	4.2753	4.2607	4.2149
pos_68	11(S)-HETE	metab_67	yes	down	-	pos	-	285.221	7.5268	M+H-2H2O, M+Na, M+H, M+H-H2O	C20H32O3	42	-	-	-	-	-	-	-	-	-	-	42	-	-	-	1.3871	1.3825	0.8735	0.01243	0.0576	4.2827	4.5248	4.1865	5.1672	4.8637	4.8444
pos_94	2-amino-6-hydroxyhexanoic acid	metab_93	yes	up	-	pos	-	130.086	0.687917	M+H-H2O, M+ACN+H, M+H, M+H-2H2O	C6H13NO3	-	49.4	-	-	-	-	-	-	-	-	-	-	49.4	-	-	1.3767	1.3732	1.1218	1.699e-05	0.0008825	5.1941	5.2062	5.1866	4.677	4.6083	4.6109
pos_99	N-Acetyl-L-glutamate 5-semialdehyde	metab_97	yes	up	C01250	pos	13074-21-0	138.055	0.67	M+H-2H2O, M+H, M+CH3OH+H, M+NH4	C7H11NO4	-	65.3	HMDB0006488	-	-	map01100;map00220;map01110;map01210;map00330;map01230	Metabolism;Metabolism;Metabolism;Metabolism;Metabolism;Metabolism	Global and overview maps;Amino acid metabolism;Global and overview maps;Global and overview maps;Amino acid metabolism;Global and overview maps	Organic acids and derivatives	Carboxylic acids and derivatives	Amino acids, peptides, and analogues	-	65.3	Metabolic pathways;Arginine biosynthesis;Biosynthesis of secondary metabolites;2-Oxocarboxylic acid metabolism;Arginine and proline metabolism;Biosynthesis of amino acids	Metabolic pathways;Arginine biosynthesis;Biosynthesis of secondary metabolites;2-Oxocarboxylic acid metabolism;Arginine and proline metabolism;Biosynthesis of amino acids	1.512	1.5047	1.1272	0.001193	0.01269	6.2289	5.987	6.2372	5.4962	5.4418	5.4322
pos_153	6-(4-ethyl-5-hydroxy-2-methoxyphenoxy)-3,4,5-trihydroxyoxane-2-carboxylic acid	metab_151	yes	up	-	pos	-	377.145	2.28422	M+H-2H2O, M+CH3OH+H, M+H-H2O	C15H20O9	-	44.9	-	-	-	-	-	-	-	-	-	-	44.9	-	-	1.065	1.0621	1.08	0.000801	0.009854	4.6629	4.6058	4.6625	4.2364	4.3449	4.3177
pos_158	Prunitrin	metab_156	yes	down	-	pos	154-36-9	429.118	2.47772	M+H-H2O, M+H, M+H-2H2O	C22H22O10	-	64.9	HMDB0034149	-	-	-	-	-	Phenylpropanoids and polyketides	Isoflavonoids	Isoflavonoid O-glycosides	-	64.9	-	-	2.7242	2.7187	0.0743	3.612e-05	0.001339	0.182	0.1775	0.1734	2.6101	2.2682	2.2933
pos_165	(E)-2-Methyl-2-buten-1-ol O-beta-D-Glucopyranoside	metab_163	yes	up	-	pos	-	293.092	2.83688	M+Na, M+2Na-H, M+H-H2O	C11H20O6	-	57.9	HMDB0033064	-	-	-	-	-	Lipids and lipid-like molecules	Fatty Acyls	Fatty acyl glycosides	-	57.9	-	-	1.9959	1.9961	1.3768	0.001803	0.01644	4.4478	4.7929	4.2401	3.1847	3.278	3.33
pos_200	4-Isopropyl-3-cyclohexene-1-carboxylic acid	metab_198	yes	down	-	pos	56424-87-4	201.149	4.24618	M+CH3OH+H, 2M+Na, 2M+NH4	C10H16O2	-	54.2	HMDB0037175	-	-	-	-	-	Lipids and lipid-like molecules	Prenol lipids	Monoterpenoids	-	54.2	-	-	1.3856	1.3824	0.8795	0.003067	0.0233	4.3485	4.4389	4.2622	5.1	4.8926	4.8462
pos_223	Humuladienone	metab_220	yes	down	-	pos	24405-90-1	238.216	6.94178	M+H, M+NH4, M+H-H2O	C15H24O	-	69.7	HMDB0038208	-	-	-	-	-	Lipids and lipid-like molecules	Prenol lipids	Sesquiterpenoids	-	69.7	-	-	1.4205	1.4227	0.8545	0.01541	0.06625	4.0545	3.8665	3.902	4.8357	4.6856	4.314
pos_224	Phytosphingosine	metab_221	yes	up	C12144	pos	554-62-1	318.3	7.02868	M+H, M+Na, M+H-H2O	C18H39NO3	-	41.7	HMDB0004610;LMSP01030001	-	-	map00600;map01100	Metabolism;Metabolism	Lipid metabolism;Global and overview maps	Organic nitrogen compounds	Organonitrogen compounds	Amines	-	41.7	Sphingolipid metabolism;Metabolic pathways	Sphingolipid metabolism;Metabolic pathways	1.4784	1.4766	1.1045	7.824e-05	0.002185	6.8653	6.9927	6.8863	6.2667	6.257	6.2582
pos_343	11,12,13-Trinor-1(10)-spirovetivene-2,7-dione	metab_340	yes	down	-	pos	84413-75-2	175.112	6.29393	M+H-H2O, 2M+NH4, M+H-2H2O	C12H16O2	-	62.4	HMDB0036734	-	-	-	-	-	Organic oxygen compounds	Organooxygen compounds	Carbonyl compounds	-	62.4	-	-	1.4626	1.4561	0.8569	0.002832	0.02216	3.8747	4.1463	3.8513	4.6825	4.6101	4.561
pos_344	(+/-)5,6-DHET lactone	metab_341	yes	down	-	pos	-	321.242	6.1889	M+H-H2O, M+H, M+H-2H2O	C20H32O3	58.4	-	-	-	-	-	-	-	-	-	-	58.4	-	-	-	1.9058	1.899	0.7588	0.03281	0.1078	3.8598	4.4604	3.6378	5.8375	4.7827	5.1377
pos_350	Geranyl hexanoate	metab_347	yes	down	-	pos	10032-02-7	253.216	5.38057	M+H-H2O, M+H, M+H-2H2O	C16H28O2	39.1	-	HMDB0029351	-	-	-	-	-	Lipids and lipid-like molecules	Fatty Acyls	Fatty alcohol esters	39.1	-	-	-	1.3232	1.3195	0.8739	0.0003855	0.006105	3.5904	3.689	3.6782	4.2457	4.1729	4.1207
pos_385	Isorhamnetin-3-O-glucoside	metab_382	yes	up	-	pos	-	501.1	3.40565	M+Na, M+K, M+H	C22H22O12	97.9	-	-	-	-	-	-	-	-	-	-	97.9	-	-	-	1.9249	1.9206	1.2623	7.308e-05	0.00213	5.2581	5.324	5.3876	4.2774	4.2649	4.1093
pos_409	Dryopteric acid	metab_405	yes	up	-	pos	-	349.092	2.77025	M+H, M+ACN+H, M+H-H2O	C17H16O8	39.3	-	LMPK12020078	-	-	-	-	-	-	-	-	39.3	-	-	-	1.1362	1.1334	1.1073	0.005453	0.03364	4.2333	4.1544	4.1821	3.8668	3.8415	3.6435
pos_410	1-O-E-Cinnamoyl-(6-arabinosylglucose)	metab_406	yes	up	-	pos	181373-66-0	460.181	2.68013	M+NH4, M+K, M+H-2H2O	C20H26O11	-	48.5	HMDB0030294	-	-	-	-	-	Phenylpropanoids and polyketides	Cinnamic acids and derivatives	Cinnamic acid esters	-	48.5	-	-	1.8199	1.8108	1.3074	0.003483	0.02524	4.6443	4.2224	4.2366	3.5116	3.1957	3.3155
pos_411	Apigenin 7-xylosyl-(1->2)-glucoside	metab_407	yes	down	-	pos	-	565.155	2.70265	M+H, M+Na, M+H-H2O	C26H28O14	35.1	-	LMPK12110353	-	-	-	-	-	-	-	-	35.1	-	-	-	1.0269	1.0246	0.9452	0.000106	0.002616	5.431	5.4125	5.4584	5.7249	5.7786	5.7446
pos_422	D-(+)-Galactosamine	metab_418	yes	up	-	pos	-	180.087	2.32748	M+H, 2M+Na, 2M+NH4	C6H13NO5	55.8	-	-	-	-	-	-	-	-	-	-	55.8	-	-	-	1.2253	1.2226	1.1023	3.547e-05	0.001335	4.8163	4.8501	4.8141	4.4162	4.3684	4.3539
pos_423	3-O-Caffeoylshikimic acid	metab_419	yes	up	-	pos	6082-44-6	301.07	2.28422	M+H-2H2O, M+CH3OH+H, M+H-H2O	C16H16O8	-	75.7	HMDB0030654	-	-	-	-	-	Phenylpropanoids and polyketides	Cinnamic acids and derivatives	Hydroxycinnamic acids and derivatives	-	75.7	-	-	1.9021	1.8973	1.2025	1.837e-06	0.0002509	6.3689	6.3478	6.4196	5.2818	5.3289	5.3049
pos_424	Cyclomammeisin	metab_420	yes	down	-	pos	30563-62-3	445.161	2.26277	M+H, M+Na, M+H-H2O	C25H26O6	-	40	HMDB0030710	-	-	-	-	-	Phenylpropanoids and polyketides	Neoflavonoids	Prenylated neoflavonoids	-	40	-	-	1.4947	1.4924	0.8112	0.0006675	0.008897	2.9257	2.9124	2.9002	3.7317	3.5249	3.5157
pos_429	Pro Ala Leu	metab_425	yes	up	-	pos	-	300.192	2.0689	M+H, M+K, M+Na	C14H25N3O4	73.4	-	-	-	-	-	-	-	-	-	-	73.4	-	-	-	1.2185	1.2177	1.1864	0.002269	0.01886	2.92	2.9206	2.9048	2.4261	2.583	2.361
pos_434	Quercetin 3-beta-D-glucoside	metab_430	yes	up	C05623	pos	482-35-9	465.103	1.9002	M+H, M+Na, M+H-H2O	C21H20O12	44.1	-	HMDB0037362	-	-	map01100;map01110;map00944	Metabolism;Metabolism;Metabolism	Global and overview maps;Global and overview maps;Biosynthesis of other secondary metabolites	Phenylpropanoids and polyketides	Flavonoids	Flavonoid glycosides	44.1	-	Metabolic pathways;Biosynthesis of secondary metabolites;Flavone and flavonol biosynthesis	Metabolic pathways;Biosynthesis of secondary metabolites;Flavone and flavonol biosynthesis	1.85	1.8444	1.3033	0.0003109	0.005308	4.3949	4.4198	4.4361	3.5419	3.2388	3.385
pos_466	Beta-D-Fructofuranosyl alpha-D-glucopyranosyl-(1->4)-D-glucopyranoside	metab_462	yes	up	-	pos	-	522.203	0.939317	M+H-H2O, M+NH4, M+H	C18H32O16	-	47.7	HMDB0029930	-	-	-	-	-	Organic oxygen compounds	Organooxygen compounds	Carbohydrates and carbohydrate conjugates	-	47.7	-	-	1.0746	1.0721	1.0677	7.352e-05	0.00213	5.4093	5.4384	5.4749	5.0935	5.0838	5.1107
pos_483	Stachyose	metab_479	yes	up	C01613	pos	10094-58-3;470-55-3;470-55-3	689.211	1.18488	M+NH4, M+Na, M+K	C24H42O21	53.1	-	PW_C001923;HMDB0003553	-	-	map01100;map00052	Metabolism;Metabolism	Global and overview maps;Carbohydrate metabolism	Organic oxygen compounds	Organooxygen compounds	Carbohydrates and carbohydrate conjugates	53.1	-	Metabolic pathways;Galactose metabolism	Metabolic pathways;Galactose metabolism	1.3827	1.3829	1.2228	0.00191	0.017	3.1345	3.3109	3.2676	2.6327	2.7613	2.55
pos_840	1-Methyladenosine	metab_834	yes	up	C02494	pos	15763-06-1	282.12	1.62473	M+H, M+CH3OH+H	C11H15N5O4	56.3	-	HMDB0243935;HMDB0003331	-	-	-	-	-	Nucleosides, nucleotides, and analogues	Purine nucleosides	Not Available	56.3	-	-	-	1.0092	1.0079	1.0763	0.005828	0.03507	4.5179	4.5301	4.5706	4.2768	4.2745	4.1022
pos_844	3,7,3',4'-Tetrahydroxy-8-methoxyflavone	metab_838	yes	up	-	pos	-	317.066	1.64665	M+H-H2O, M+H	C16H12O7	43.2	-	LMPK12111607	-	-	-	-	-	-	-	-	43.2	-	-	-	1.6312	1.6239	1.2605	0.003746	0.02647	4.2563	3.8851	3.865	3.2579	3.1811	3.0871
pos_873	4-Hydroxy-3-methoxycinnamaldehyde	metab_867	yes	down	C02666	pos	458-36-6;20649-42-7	179.07	1.70598	M+H, M+NH4	C10H10O3	36.7	-	HMDB0141782	-	-	map01100;map00940;map01110	Metabolism;Metabolism;Metabolism	Global and overview maps;Biosynthesis of other secondary metabolites;Global and overview maps	Benzenoids	Phenols	Methoxyphenols	36.7	-	Metabolic pathways;Phenylpropanoid biosynthesis;Biosynthesis of secondary metabolites	Metabolic pathways;Phenylpropanoid biosynthesis;Biosynthesis of secondary metabolites	1.0081	1.0092	0.9408	0.006327	0.03687	5.1876	5.0517	5.2629	5.4891	5.4964	5.4899
pos_903	Oleoside dimethyl ester	metab_897	yes	up	-	pos	30164-95-5	436.181	1.79115	M+NH4, M+Na	C18H26O11	-	38.6	HMDB0031350	-	-	-	-	-	Lipids and lipid-like molecules	Prenol lipids	Terpene glycosides	-	38.6	-	-	1.8964	1.8942	1.3451	0.01276	0.05834	4.7402	4.4094	4.591	3.1971	3.103	3.9159
pos_904	4-Hydroxy-5-(3',4'-dihydroxyphenyl)-valeric acid-O-methyl-O-glucuronide	metab_898	yes	up	-	pos	-	452.176	1.79115	M+NH4, M+Na	C18H26O12	-	43.4	HMDB0059972	-	-	-	-	-	Organic oxygen compounds	Organooxygen compounds	Carbohydrates and carbohydrate conjugates	-	43.4	-	-	2.6962	2.6917	2.5576	0.03897	0.1208	4.8806	3.5809	4.2665	0.1507	2.1712	2.6556
pos_921	Procyanidin C1	metab_915	yes	down	C17624	pos	37064-30-5	867.212	1.83447	M+H, M+Na	C45H38O18	-	41.4	HMDB0038370	-	-	-	-	-	Phenylpropanoids and polyketides	Flavonoids	Biflavonoids and polyflavonoids	-	41.4	-	-	2.8138	2.8054	0.5987	0.0002854	0.005013	3.203	3.7164	3.7175	6.1277	5.8046	5.8372
pos_939	3,4-Dimethoxyphenyl methyl ketone	metab_933	yes	up	-	pos	1131-62-0	181.086	1.9002	M+H-H2O, M+H	C10H12O3	82.4	-	HMDB0301758	-	-	-	-	-	Organic oxygen compounds	Organooxygen compounds	Carbonyl compounds	82.4	-	-	-	1.5084	1.5069	1.1759	0.0001651	0.003504	4.5211	4.6647	4.5095	3.8793	3.8801	3.8854
pos_941	Delphinidin	metab_935	yes	up	C05908	pos	13270-61-6;528-53-0	285.039	1.9002	M+H-H2O, M+H	C15H10O7	52.8	-	LMPK12010001;HMDB0003074	-	-	map00942;map00941;map01110	Metabolism;Metabolism;Metabolism	Biosynthesis of other secondary metabolites;Biosynthesis of other secondary metabolites;Global and overview maps	Phenylpropanoids and polyketides	Flavonoids	Hydroxyflavonoids	52.8	-	Anthocyanin biosynthesis;Flavonoid biosynthesis;Biosynthesis of secondary metabolites	Anthocyanin biosynthesis;Flavonoid biosynthesis;Biosynthesis of secondary metabolites	3.8009	3.7916	7.0425	7.055e-09	1.735e-05	4.9773	4.9771	5.0199	0.7342	0.7241	0.6678
pos_994	Kynurenic acid	metab_988	yes	down	C01717	pos	492-27-3	222.076	2.13353	M+H, M+CH3OH+H	C10H7NO3	62.5	-	PW_C000566;HMDB0000715	-	-	map01100;map00380	Metabolism;Metabolism	Global and overview maps;Amino acid metabolism	Organoheterocyclic compounds	Quinolines and derivatives	Quinoline carboxylic acids	62.5	-	Metabolic pathways;Tryptophan metabolism	Metabolic pathways;Tryptophan metabolism	1.7643	1.7598	0.764	0.002215	0.0186	3.22	3.2231	2.8707	4.1317	4.1403	3.9196
pos_1001	Oleuroside	metab_995	yes	down	-	pos	116383-31-4	579.15	2.15398	M+CH3OH+H, M+K	C25H32O13	-	60	HMDB0035352	-	-	-	-	-	Lipids and lipid-like molecules	Prenol lipids	Sesquiterpenoids	-	60	-	-	2.5509	2.5496	0.638	0.0004519	0.006945	3.6732	3.212	3.5299	5.6964	5.3172	5.3135
pos_1003	Butyl 3-O-caffeoylquinate	metab_997	yes	down	-	pos	132741-56-1	393.152	2.17605	M+H-H2O, M+ACN+Na	C20H26O9	-	52.9	HMDB0034588	-	-	-	-	-	Organic oxygen compounds	Organooxygen compounds	Alcohols and polyols	-	52.9	-	-	1.785	1.7794	0.7825	0.0003031	0.005225	3.4684	3.5592	3.3027	4.4385	4.426	4.3365
pos_1004	Carboxybupranolol, 4-chloro-3-[3-(1,1-dimethylethylamino)-2-hydroxy-propyloxy]benzoic acid	metab_998	yes	down	-	pos	-	319.14	2.17605	M+H, M+NH4	C14H20ClNO4	-	37.4	HMDB0061131	-	-	-	-	-	Benzenoids	Benzene and substituted derivatives	Benzoic acids and derivatives	-	37.4	-	-	1.8069	1.8019	0.6504	0.006026	0.03585	2.117	2.081	1.5668	3.0592	2.8003	3.0059
pos_1035	Zingerone	metab_1029	yes	up	C17497	pos	122-48-5	195.102	2.32748	M+H, M+NH4	C11H14O3	77.8	-	HMDB0032590	-	-	-	-	-	Benzenoids	Phenols	Methoxyphenols	77.8	-	-	-	1.4923	1.4884	1.1594	3.344e-05	0.001298	4.8218	4.7891	4.8573	4.1545	4.2067	4.1184
pos_1069	2-[2,4,6-trihydroxy-3-(3-methylbut-2-en-1-yl)phenyl]acetic acid	metab_1063	yes	up	-	pos	-	235.096	2.47772	M+H-H2O, M+NH4	C13H16O5	-	53.5	-	-	-	-	-	-	-	-	-	-	53.5	-	-	1.0182	1.0141	1.0888	0.00149	0.01464	3.9568	3.8411	3.8308	3.5702	3.5512	3.5582
pos_1073	(S)-Edulinine	metab_1067	yes	down	-	pos	27495-36-9	330.11	2.5	M+K, M+ACN+Na	C16H21NO4	-	74.2	HMDB0030178	-	-	-	-	-	Organoheterocyclic compounds	Quinolines and derivatives	Quinolones and derivatives	-	74.2	-	-	1.0214	1.0156	0.9203	0.008916	0.04661	3.8435	3.9408	3.7566	4.0969	4.1899	4.2538
pos_1086	Epi-4'-hydroxyjasmonic acid	metab_1080	yes	up	-	pos	-	227.128	2.54483	M+H-H2O, M+H	C12H18O4	31.5	-	LMFA02020008	-	-	-	-	-	-	-	-	31.5	-	-	-	1.7304	1.7267	1.1903	8.861e-06	0.0006109	5.5521	5.6037	5.5488	4.726	4.6694	4.639
pos_1089	(+)-Lyoniresinol 9-glucoside	metab_1083	yes	down	-	pos	-	600.265	2.54483	M+NH4, M+Na	C28H38O13	-	53.3	HMDB0041148	-	-	-	-	-	Lignans, neolignans and related compounds	Lignan glycosides	Not Available	-	53.3	-	-	1.0222	1.0234	0.9317	0.02231	0.08432	4.9471	4.8469	4.7754	5.37	5.1871	5.0799
pos_1098	4'-O-Methyl-(-)-epicatechin 3'-O-glucuronide	metab_1092	yes	up	-	pos	-	481.134	2.58998	M+H, M+K	C22H24O12	-	38	HMDB0041674	-	-	-	-	-	Phenylpropanoids and polyketides	Flavonoids	Flavonoid glycosides	-	38	-	-	2.0145	2.0098	1.3569	0.0001044	0.002603	4.6168	4.5651	4.6545	3.3588	3.5438	3.2954
pos_1127	(7'x,8'x)-4,7'-Epoxy-3,8'-bilign-7-ene-3,5'-dimethoxy-4',9,9'-triol	metab_1121	yes	down	-	pos	-	359.149	2.72525	M+H-2H2O, M+H	C20H22O6	37.1	-	HMDB0041276	-	-	-	-	-	Phenylpropanoids and polyketides	2-arylbenzofuran flavonoids	Not Available	37.1	-	-	-	1.3484	1.3445	0.8396	0.006517	0.03759	2.8364	3.0366	3.1875	3.6778	3.5894	3.5245
pos_1141	5-O-Methylvisamminol	metab_1135	yes	up	C09016	pos	80681-42-1	273.112	2.77025	M+H-H2O, M+H	C16H18O5	31.5	-	LMPK13110002	-	-	-	-	-	-	-	-	31.5	-	-	-	2.0467	2.0418	1.4041	1.252e-05	0.0007497	4.2713	4.3153	4.392	3.1037	3.1208	3.0182
pos_1165	5''-(4-Hydroxy-(E)-cinnamoyl) alpha-L-arabinofuranosyl-(1->3)-beta-D-xylopyranosyl-(1->4)-D-xylopyranoside	metab_1158	yes	up	-	pos	102254-69-3	599.14	2.83688	M+Na, M+K	C24H32O15	-	54.9	HMDB0041489	-	-	-	-	-	Organic oxygen compounds	Organooxygen compounds	Carbohydrates and carbohydrate conjugates	-	54.9	-	-	2.1261	2.1237	1.3111	9.025e-05	0.002386	5.6159	5.8168	5.6738	4.322	4.4643	4.2609
pos_1182	3-hydroxy-3-methyl-4-phenylbutan-2-one	metab_1175	yes	up	-	pos	-	220.133	2.88232	M+ACN+H, 2M+H	C11H14O2	-	30.3	-	-	-	-	-	-	-	-	-	-	30.3	-	-	1.4581	1.4545	1.2006	0.0001243	0.002958	3.7769	3.8254	3.8021	3.2473	3.1232	3.1261
pos_1207	Echinone	metab_1200	yes	up	C10338	pos	80348-65-8	345.133	2.99538	M+H-H2O, M+H	C19H20O6	36.1	-	-	-	-	-	-	-	-	-	-	36.1	-	-	-	1.8126	1.8052	1.2896	0.003485	0.02524	4.4358	4.3483	4.8566	3.6129	3.5318	3.4346
pos_1226	4R,5R,6S-Trihydroxy-2-hydroxymethyl-2-cyclohexen-1-one 6-(2-hydroxy-6-methylbenzoate)	metab_1219	yes	up	-	pos	146475-71-0	331.081	3.06402	M+Na, 2M+Na	C15H16O7	-	53.4	HMDB0040692	-	-	-	-	-	Benzenoids	Benzene and substituted derivatives	Benzoic acids and derivatives	-	53.4	-	-	1.4674	1.4687	1.1484	0.004352	0.02927	5.2317	5.4634	5.0706	4.5276	4.6104	4.5912
pos_1233	3-Methoxy-4-hydroxyphenylethylene glycol	metab_1226	yes	up	-	pos	-	167.07	3.10927	M+H-H2O, 2M+H	C9H12O4	48.8	-	-	-	-	-	-	-	-	-	-	48.8	-	-	-	1.9848	1.9811	1.283	3.36e-05	0.001298	5.3529	5.4091	5.2183	4.1686	4.1367	4.1516
pos_1281	Citromitin	metab_1274	yes	up	-	pos	-	437.181	3.2912	M+H-H2O, M+CH3OH+H	C21H24O8	-	37	HMDB0037313	-	-	-	-	-	Phenylpropanoids and polyketides	Flavonoids	O-methylated flavonoids	-	37	-	-	1.2791	1.2762	1.1098	4.54e-05	0.001572	4.9467	4.9498	4.9004	4.4501	4.407	4.4761
pos_1293	Clavirin I	metab_1286	yes	down	-	pos	-	291.159	3.33705	M+H-H2O, M+H	C17H22O4	41.1	-	LMFA03120025	-	-	-	-	-	-	-	-	41.1	-	-	-	1.8292	1.8204	0.7413	0.003657	0.02596	2.8888	3.1901	2.855	3.8357	4.2756	3.9384
pos_1294	Hyperoside	metab_1287	yes	up	C10073	pos	482-36-0	465.103	3.13162	M+H, M+Na	C21H20O12	92.6	-	HMDB0030775	-	-	-	-	-	Phenylpropanoids and polyketides	Flavonoids	Flavonoid glycosides	92.6	-	-	-	3.6838	3.6716	4.3964	0.0008646	0.01034	5.2956	5.2768	5.4	2.1266	0.7815	0.7235
pos_1299	3,4,5-trihydroxy-6-[(4-oxo-2-phenyl-4H-chromen-3-yl)oxy]oxane-2-carboxylic acid	metab_1292	yes	up	-	pos	-	447.128	3.36	M+H, M+CH3OH+H	C21H18O9	-	40.4	-	-	-	-	-	-	-	-	-	-	40.4	-	-	1.6472	1.6412	1.4045	0.006259	0.03662	2.9909	2.7669	3.1802	2.0329	2.3422	1.9889
pos_1304	Gamma-Glutamyl-S-methylcysteinyl-beta-alanine	metab_1297	yes	up	-	pos	102148-91-4	377.15	3.38282	M+ACN+H, 2M+ACN+H	C12H21N3O6S	-	47.6	HMDB0039504	-	-	-	-	-	Organic acids and derivatives	Peptidomimetics	Hybrid peptides	-	47.6	-	-	1.6894	1.6923	1.2443	0.007312	0.04064	4.4671	5.0206	4.5229	3.6722	3.7481	3.8373
pos_1321	6-(4-ethenyl-3-hydroxyphenoxy)-3,4,5-trihydroxyoxane-2-carboxylic acid	metab_1314	yes	up	-	pos	-	313.092	3.47398	M+H-H2O, M+H	C14H16O8	-	35	-	-	-	-	-	-	-	-	-	-	35	-	-	2.2348	2.2305	1.3975	2.011e-06	0.0002559	5.1699	5.2739	5.2072	3.6962	3.7471	3.7564
pos_1409	5-Hydroxy-7-(4-hydroxy-3-methoxyphenyl)-1-phenyl-3-heptanone	metab_1402	yes	up	-	pos	79559-61-8	311.164	3.9292	M+H-H2O, M+Na	C20H24O4	-	63	HMDB0029524	-	-	-	-	-	Phenylpropanoids and polyketides	Diarylheptanoids	Linear diarylheptanoids	-	63	-	-	1.9961	1.9918	1.3769	6.153e-05	0.001923	4.3624	4.4256	4.2442	3.2196	3.0764	3.1679
pos_1466	(2S,4S,6S)-2-[2-(4-Hydroxy-3-meyhoxyphenyl)ethyl]tetrahydro-6-(4,5-dihydroxy-3-methoxyphenyl)-2H-pyran-4-yl 4-acetate	metab_1459	yes	up	-	pos	182227-92-5	433.186	4.38253	M+H, M+Na	C23H28O8	-	36.5	HMDB0030503	-	-	-	-	-	Phenylpropanoids and polyketides	Diarylheptanoids	Linear diarylheptanoids	-	36.5	-	-	3.2826	3.2752	4.1838	0.000521	0.007537	4.4261	4.4754	3.9376	1.1453	0.5075	1.4162
pos_1474	Pindone	metab_1467	yes	up	C19141	pos	83-26-1	231.101	4.45065	M+H-H2O, M+H	C14H14O3	63.7	-	HMDB0256560	-	-	-	-	-	Benzenoids	Indanes	Indanones	63.7	-	-	-	1.1209	1.1212	1.1597	0.0177	0.07294	3.0757	3.0489	3.0047	2.5574	2.4827	2.8309
pos_1504	1-(2-Furanyl)-2-propanone	metab_1497	yes	up	-	pos	6975-60-6	107.049	3.9292	M+H-H2O, M+ACN+Na	C7H8O2	-	42.5	HMDB0032917	-	-	-	-	-	Organoheterocyclic compounds	Heteroaromatic compounds	Not Available	-	42.5	-	-	1.4572	1.4542	1.1755	1.375e-05	0.0007926	4.2449	4.2473	4.1901	3.5946	3.6242	3.5686
pos_1510	6''-O-Acetylglycitin	metab_1503	yes	up	-	pos	134859-96-4	521.165	3.0411	M+H, M+CH3OH+H	C24H24O11	-	76.3	HMDB0039489	-	-	-	-	-	Phenylpropanoids and polyketides	Isoflavonoids	Isoflavonoid O-glycosides	-	76.3	-	-	1.4728	1.4645	1.2257	0.006593	0.03792	3.9749	3.5352	3.6508	3.056	3.0358	3.0142
pos_1667	Ile Glu Leu	metab_1660	yes	up	-	pos	-	374.228	2.95002	M+H, M+Na	C17H31N3O6	90.3	-	-	-	-	-	-	-	-	-	-	90.3	-	-	-	1.4662	1.4737	1.4489	0.0414	0.1261	2.4827	2.9319	2.1101	1.5448	1.929	1.7192
pos_1672	RETUSOQUINONE	metab_1665	yes	down	-	pos	-	161.096	6.29393	M+H-H2O, M+H	C11H12O	52.3	-	-	-	-	-	-	-	-	-	-	52.3	-	-	-	1.3534	1.3483	0.887	0.001278	0.01323	4.3207	4.4976	4.3186	4.9963	4.9402	4.8739
pos_1708	Avocadyne	metab_1701	yes	down	-	pos	129099-96-3	302.269	6.5906	M+NH4, M+2Na-H	C17H32O3	-	30.8	HMDB0035473;LMFA05000643	-	-	-	-	-	Lipids and lipid-like molecules	Fatty Acyls	Fatty alcohols	-	30.8	-	-	1.9923	1.9888	0.7004	0.01929	0.07694	3.5019	3.3259	2.5242	4.7976	4.1824	4.3693
pos_1711	19(20)-EpDPE	metab_1704	yes	up	-	pos	-	362.267	6.61318	M+H, M+NH4	C22H32O3	-	54.9	HMDB0013620;LMFA04000038	-	-	-	-	-	Lipids and lipid-like molecules	Fatty Acyls	Lineolic acids and derivatives	-	54.9	-	-	1.3203	1.3138	1.1297	0.004808	0.03125	4.9247	4.6176	4.7021	4.1807	4.1653	4.2621
pos_1732	Beta-D-Glucopyranosyl-11-hydroxyjasmonic acid	metab_1725	yes	up	-	pos	-	411.163	2.54483	M+Na, M+K	C18H28O9	-	48	HMDB0039964	-	-	-	-	-	Lipids and lipid-like molecules	Fatty Acyls	Fatty acyl glycosides	-	48	-	-	2.2862	2.2808	1.4555	0.000734	0.009417	4.9965	5.1083	5.0682	3.776	3.4461	3.2015
pos_1737	Yucalexin P21	metab_1730	yes	up	-	pos	119626-54-9	322.274	6.85378	M+NH4, M+Na	C20H32O2	-	71.4	HMDB0036754	-	-	-	-	-	Lipids and lipid-like molecules	Prenol lipids	Diterpenoids	-	71.4	-	-	1.2935	1.2876	1.1357	0.01577	0.06738	4.7837	4.4146	4.6379	3.8908	4.1446	4.1468
pos_1739	3,4,5-trihydroxy-6-[3-(2-phenylcyclobutyl)phenoxy]oxane-2-carboxylic acid	metab_1732	yes	down	-	pos	-	401.16	2.5	M+H-H2O, M+H	C22H24O7	-	30.2	-	-	-	-	-	-	-	-	-	-	30.2	-	-	1.1429	1.1398	0.9243	0.001778	0.01637	4.8806	4.9223	4.8544	5.2365	5.2346	5.3865
pos_1747	C17 Sphinganine	metab_1740	yes	up	-	pos	-	288.29	6.9634	M+H-H2O, M+H	C17H37NO2	42.8	-	LMSP01040003	-	-	-	-	-	-	-	-	42.8	-	-	-	1.8972	1.895	1.3157	0.0001531	0.003372	4.3915	4.6456	4.4765	3.4474	3.3828	3.4415
pos_1796	Dihydroceramide	metab_1789	yes	up	C12126	pos	2304-80-5	330.3	7.2911	M+H-H2O, M+H	C19H39NO3	33.9	-	HMDB0011761;PW_C002905;HMDB0006752	-	-	map00600;map01100	Metabolism;Metabolism	Lipid metabolism;Global and overview maps	Lipids and lipid-like molecules	Sphingolipids	Ceramides	33.9	-	Sphingolipid metabolism;Metabolic pathways	Sphingolipid metabolism;Metabolic pathways	1.2644	1.2601	1.0984	0.03151	0.1053	6.4105	6.0727	6.0325	5.7804	5.695	5.3827
pos_1876	15(S)-Hydroxyeicosatrienoic acid	metab_1869	yes	up	-	pos	13-16-1	355.284	7.85582	M+H-H2O, M+CH3OH+H	C20H34O3	-	74.5	HMDB0005045	-	-	-	-	-	Lipids and lipid-like molecules	Fatty Acyls	Eicosanoids	-	74.5	-	-	1.1672	1.1652	1.094	0.03023	0.1021	5.6797	5.6061	5.2279	5.0831	4.9707	5.0413
pos_1958	Oleoyl Ethanolamide	metab_1951	yes	up	-	pos	111-58-0	326.305	8.56148	M+H, M+Na	C20H39NO2	79.5	-	HMDB0002088	-	-	-	-	-	Organic nitrogen compounds	Organonitrogen compounds	Amines	79.5	-	-	-	1.0675	1.0637	1.0661	0.009421	0.04836	5.9936	5.8002	5.9272	5.4636	5.5154	5.6443
pos_2004	Ethyltestosterone	metab_1997	yes	up	-	pos	1235-97-8	349.273	8.96722	M+CH3OH+H, 2M+K	C21H32O2	-	50.5	HMDB0006002;LMST02030201	-	-	-	-	-	Lipids and lipid-like molecules	Steroids and steroid derivatives	Pregnane steroids	-	50.5	-	-	1.3732	1.3737	1.1522	0.01206	0.05651	4.6903	4.6992	4.5801	4.2039	4.1504	3.7732
pos_2108	Neoannonin B	metab_2101	yes	up	-	pos	170312-94-4	629.475	9.58627	M+H-H2O, M+Na	C37H66O6	-	60.1	HMDB0037117	-	-	-	-	-	Lipids and lipid-like molecules	Fatty Acyls	Fatty alcohols	-	60.1	-	-	1.307	1.3045	1.1109	0.001164	0.01247	5.1924	5.2926	5.2068	4.7803	4.6015	4.7454
pos_2123	DGDG(16:0/18:2)	metab_2116	yes	up	-	pos	-	934.645	9.83962	M+NH4, M+Na	C49H88O15	72.9	-	-	-	-	-	-	-	-	-	-	72.9	-	-	-	1.2012	1.2019	1.0982	0.01083	0.05317	5.3383	5.354	5.073	4.7046	4.8797	4.7712
pos_2135	Cer(d16:1(4E)/20:0(2OH))	metab_2128	yes	up	-	pos	-	582.545	10.097	M+H-H2O, M+H	C36H71NO4	43.2	-	LMSP02010084	-	-	-	-	-	-	-	-	43.2	-	-	-	1.1791	1.1799	1.0996	0.005791	0.03493	4.8604	5.0047	4.8129	4.3542	4.4392	4.5569
pos_2148	MGDG(18:2/18:2)	metab_2141	yes	up	-	pos	-	801.547	9.83962	M+NH4, M+Na	C45H78O10	74.7	-	-	-	-	-	-	-	-	-	-	74.7	-	-	-	1.228	1.2269	1.0993	0.001303	0.01339	5.0989	5.1374	5.1038	4.5389	4.7024	4.7124
pos_2519	Trigonelline	metab_2512	yes	up	C01004	pos	535-83-1	138.055	0.879233	M+H	C7H7NO2	60.6	-	HMDB0000875	-	-	map00760	Metabolism	Metabolism of cofactors and vitamins	Alkaloids and derivatives	Not Available	Not Available	60.6	-	Nicotinate and nicotinamide metabolism	Nicotinate and nicotinamide metabolism	1.5321	1.5256	1.1325	0.0007715	0.009729	6.1155	5.9172	6.1702	5.3491	5.3656	5.3595
pos_2672	Ser Val	metab_2665	yes	up	-	pos	-	205.118	1.4401	M+H	C8H16N2O4	61.9	-	-	-	-	-	-	-	-	-	-	61.9	-	-	-	1.1861	1.1844	1.1107	0.0006718	0.00893	4.2503	4.3441	4.2576	3.9232	3.8282	3.8207
pos_2705	3-Indolebutyric acid	metab_2698	yes	up	C11284	pos	133-32-4	221.128	1.56168	M+NH4	C12H13NO2	-	53.2	HMDB0002096	-	-	-	-	-	Organoheterocyclic compounds	Indoles and derivatives	Indoles	-	53.2	-	-	2.6451	2.6384	1.8022	5.619e-05	0.001834	4.7309	4.6362	4.684	2.7009	2.7213	2.3735
pos_2775	Okanin	metab_2768	yes	down	C08724	pos	484-76-4	289.071	1.76857	M+H	C15H12O6	68.5	-	LMPK12120181;HMDB0245776	-	-	-	-	-	Phenylpropanoids and polyketides	Linear 1,3-diarylpropanoids	Chalcones and dihydrochalcones	68.5	-	-	-	1.6489	1.6453	0.8236	0.00414	0.02836	4.0706	4.1042	3.7632	5.0157	4.7777	4.6986
pos_2827	6-O-b-D-Fructofuranosyl-2-deoxy-D-glucose	metab_2820	yes	up	-	pos	57440-92-3	653.255	1.92117	2M+H	C12H22O10	-	31.3	HMDB0040154	-	-	-	-	-	Organic oxygen compounds	Organooxygen compounds	Carbohydrates and carbohydrate conjugates	-	31.3	-	-	2.6886	2.6747	1.8282	0.002295	0.019	5.3552	4.2784	5.0556	2.6836	2.6711	2.6782
pos_2828	5-Hydroxy-2-(1-hydroxy-5-methyl-4-hexenyl)benzofuran	metab_2821	yes	up	-	pos	197971-79-2	264.159	1.94112	M+NH4	C15H18O3	-	67.4	HMDB0031916	-	-	-	-	-	Organoheterocyclic compounds	Benzofurans	Not Available	-	67.4	-	-	4.0763	4.0671	17.5226	7.224e-08	4.441e-05	5.223	5.3153	5.142	0.314	0.3076	0.2733
pos_2832	Cyanin	metab_2825	yes	up	C08639	pos	20905-74-2	611.161	1.94112	M+H	C27H30O16	47.3	-	HMDB0304306;LMPK12010113	-	-	map00942	Metabolism	Biosynthesis of other secondary metabolites	Phenylpropanoids and polyketides	Flavonoids	Flavonoid glycosides	47.3	-	Anthocyanin biosynthesis	Anthocyanin biosynthesis	2.7216	2.7135	1.535	2.815e-05	0.001187	6.3519	6.2052	6.3976	4.2404	4.1533	3.9535
pos_2835	Adipoyl-CoA	metab_2828	yes	up	C14143	pos	25119-42-0	913.201	1.94112	M+NH4	C27H44N7O19P3S	-	40.5	LMFA07050284;HMDB0004047	-	-	map01100	Metabolism	Global and overview maps	Lipids and lipid-like molecules	Fatty Acyls	Fatty acyl thioesters	-	40.5	Metabolic pathways	Metabolic pathways	3.2817	3.2696	2.2599	0.001316	0.01343	5.8713	5.751	6.0377	3.407	2.1934	2.2149
pos_2842	Trans-Grandmarin	metab_2835	yes	up	-	pos	119239-48-4	648.205	1.96328	2M+ACN+Na	C15H16O6	-	43.1	HMDB0039030	-	-	-	-	-	Phenylpropanoids and polyketides	Coumarins and derivatives	Pyranocoumarins	-	43.1	-	-	2.0443	2.0302	1.427	0.01363	0.06114	5.0695	3.9585	4.6073	3.2172	3.2047	3.1343
pos_2857	Polygonolide	metab_2850	yes	down	C09963	pos	100560-66-5	221.081	2.04663	M+H	C12H12O4	46.2	-	-	-	-	-	-	-	-	-	-	46.2	-	-	-	1.6448	1.642	0.7476	0.01219	0.05682	2.9697	2.6208	2.2739	3.453	3.5634	3.5006
pos_2868	Luteolin-7-O-glucoside	metab_2861	yes	up	-	pos	-	449.108	2.08933	M+H	C21H20O11	85	-	-	-	-	-	-	-	-	-	-	85	-	-	-	2.5722	2.5644	1.338	0.001504	0.01471	7.9918	7.9707	8.0413	6.4683	5.8931	5.5789
pos_2873	Caffeine	metab_2866	yes	down	C07481	pos	1958-08-02	195.088	2.13353	M+H	C8H10N4O2	90.5	-	HMDB0001847;PW_C001222	-	-	map01100;map01110;map00232	Metabolism;Metabolism;Metabolism	Global and overview maps;Global and overview maps;Biosynthesis of other secondary metabolites	Organoheterocyclic compounds	Imidazopyrimidines	Purines and purine derivatives	90.5	-	Metabolic pathways;Biosynthesis of secondary metabolites;Caffeine metabolism	Metabolic pathways;Biosynthesis of secondary metabolites;Caffeine metabolism	1.0989	1.1011	0.8856	0.01854	0.07526	3.302	3.0479	3.104	3.6437	3.6179	3.4131
pos_2874	6''-O-(3-Hydroxy-3-methylglutaroyl)astragalin	metab_2867	yes	up	-	pos	157407-84-6	625.175	2.15398	M+CH3OH+H	C27H28O15	-	72.8	HMDB0041129	-	-	-	-	-	Phenylpropanoids and polyketides	Flavonoids	Flavonoid glycosides	-	72.8	-	-	3.0732	3.0662	2.1321	6.576e-05	0.001993	5.3423	5.2062	5.3775	2.2363	2.7695	2.4628
pos_2878	1-Methyl-1,3-cyclohexadiene	metab_2871	yes	down	-	pos	1489-56-1	95.086	2.19847	M+H	C7H10	-	30.2	HMDB0031532	-	-	-	-	-	Hydrocarbons	Unsaturated hydrocarbons	Branched unsaturated hydrocarbons	-	30.2	-	-	1.0979	1.0985	0.9	0.007818	0.0425	3.5541	3.4478	3.4435	3.964	3.9096	3.7335
pos_2887	Thr Trp	metab_2880	yes	down	-	pos	-	306.145	2.21967	M+H	C15H19N3O4	77.1	-	-	-	-	-	-	-	-	-	-	77.1	-	-	-	1.0193	1.0148	0.8922	0.005245	0.03279	2.6888	2.7449	2.6634	2.9475	3.1288	2.9993
pos_2903	Hydroxyprolyl-Tyrosine	metab_2896	yes	up	-	pos	-	259.108	2.28422	M+H-2H2O	C14H18N2O5	-	45.6	HMDB0028875	-	-	-	-	-	Organic acids and derivatives	Carboxylic acids and derivatives	Amino acids, peptides, and analogues	-	45.6	-	-	1.6335	1.631	1.3315	0.006493	0.03751	3.2057	3.5462	3.4771	2.8123	2.4293	2.4422
pos_2917	Quercetin 3,7-dimethyl ether 5-glucoside	metab_2910	yes	up	-	pos	128388-46-5	493.134	2.32748	M+H	C23H24O12	56	-	HMDB0039336;LMPK12112710	-	-	-	-	-	Phenylpropanoids and polyketides	Flavonoids	Flavonoid glycosides	56	-	-	-	1.5662	1.5588	1.1902	0.004577	0.0302	5.0607	4.6367	4.7027	3.9886	4.0487	4.0628
pos_2918	Stachyoside A	metab_2911	yes	down	-	pos	131862-10-7	571.163	2.32748	M+2Na-H	C21H34O15	-	73	HMDB0039092	-	-	-	-	-	Lipids and lipid-like molecules	Prenol lipids	Terpene glycosides	-	73	-	-	1.9146	1.9112	0.8132	3.609e-05	0.001339	4.8419	4.6818	4.7592	5.8302	5.9116	5.8219
pos_2922	Eugenitol	metab_2915	yes	up	-	pos	491-48-5	224.092	2.34803	M+NH4	C11H10O4	-	74.1	HMDB0029466	-	-	-	-	-	Organoheterocyclic compounds	Benzopyrans	1-benzopyrans	-	74.1	-	-	1.3766	1.3722	1.1811	0.0003993	0.00628	3.7581	3.6857	3.708	3.2234	3.1592	3.0598
pos_2925	Xanthotoxol glucoside	metab_2918	yes	up	-	pos	-	751.15	2.34803	2M+Na	C17H16O9	-	67.1	HMDB0038626	-	-	-	-	-	Phenylpropanoids and polyketides	Coumarins and derivatives	Coumarin glycosides	-	67.1	-	-	3.6757	3.6632	3.3953	0.002087	0.01792	5.8669	5.8698	5.9166	2.9028	1.1813	1.1159
pos_2927	13-Hydroxy-5'-O-methylmelledonal	metab_2920	yes	down	-	pos	112471-06-4	480.223	2.3692	M+NH4	C24H30O9	-	76.7	HMDB0035864	-	-	-	-	-	Lipids and lipid-like molecules	Prenol lipids	Sesquiterpenoids	-	76.7	-	-	1.256	1.255	0.9074	0.00139	0.01389	4.7601	4.6775	4.7609	5.1412	5.1838	5.3218
pos_2941	Vitisin B	metab_2934	yes	down	-	pos	-	581.151	2.41213	M+ACN+Na	C25H25O12+	-	57.6	HMDB0036825	-	-	-	-	-	Organoheterocyclic compounds	Pyrrolidines	Phenylpyrrolidines	-	57.6	-	-	1.1563	1.154	0.9202	0.001426	0.01416	4.7923	4.6825	4.667	5.0628	5.1811	5.1262
pos_2949	Estriol-16-Glucuronide	metab_2942	yes	up	C05504	pos	1852-50-2	482.238	2.43397	M+NH4	C24H32O9	-	56.7	HMDB0006766	-	-	-	-	-	Lipids and lipid-like molecules	Steroids and steroid derivatives	Steroidal glycosides	-	56.7	-	-	1.5238	1.5217	1.1429	0.0002848	0.005013	5.5235	5.6432	5.6039	4.8495	4.838	4.9844
pos_2953	Pro Val Leu	metab_2946	yes	down	-	pos	-	328.223	2.45618	M+H	C16H29N3O4	79.1	-	-	-	-	-	-	-	-	-	-	79.1	-	-	-	1.8542	1.8432	0.6499	0.005184	0.03253	1.8211	2.3813	1.796	3.0164	3.0741	3.1364
pos_2984	Demethylsulochrin	metab_2977	yes	up	C15504	pos	-	319.081	2.58998	M+H	C16H14O7	59.1	-	-	-	-	-	-	-	-	-	-	59.1	-	-	-	2.8204	2.8125	1.7753	1.718e-05	0.0008865	5.4221	5.3748	5.4436	3.2325	3.0044	2.9114
pos_3005	Vanillylmandelic acid	metab_2998	yes	up	C05584	pos	13244-77-4;55-10-7	181.05	2.68013	M+H-H2O	C9H10O5	36.1	-	HMDB0304531;HMDB0000291;HMDB0254548;PW_C000197	-	-	map01100;map00350	Metabolism;Metabolism	Global and overview maps;Amino acid metabolism	Benzenoids	Phenols	Methoxyphenols	36.1	-	Metabolic pathways;Tyrosine metabolism	Metabolic pathways;Tyrosine metabolism	1.3204	1.3182	1.1304	0.0002031	0.004061	4.5749	4.5884	4.4647	4.0003	4.0248	4.032
pos_3006	1,1'-(Tetrahydro-6a-hydroxy-2,3a,5-trimethylfuro[2,3-d]-1,3-dioxole-2,5-diyl)bis-ethanone	metab_2999	yes	up	-	pos	18114-49-3	241.107	2.68013	M+H-H2O	C12H18O6	-	79.9	HMDB0032527	-	-	-	-	-	Organic oxygen compounds	Organooxygen compounds	Ethers	-	79.9	-	-	1.9376	1.9336	1.3432	3.46e-05	0.001329	4.4287	4.3905	4.3098	3.2151	3.3425	3.2154
pos_3022	(E)-1-O-Cinnamoyl-beta-D-glucose	metab_3015	yes	down	-	pos	40004-96-4	621.216	2.72525	2M+H	C15H18O7	-	60	HMDB0030293	-	-	-	-	-	Phenylpropanoids and polyketides	Cinnamic acids and derivatives	Cinnamic acid esters	-	60	-	-	1.2435	1.2423	0.9077	0.0007949	0.009854	4.6904	4.6096	4.6016	5.1896	5.0514	5.0726
pos_3034	DL-3,4-Dihydroxymandelic acid	metab_3027	yes	up	-	pos	-	167.034	2.77025	M+H-H2O	C8H8O5	57.9	-	-	-	-	-	-	-	-	-	-	57.9	-	-	-	1.7527	1.7466	1.2774	0.0001093	0.002687	4.2398	4.1244	4.3042	3.3559	3.309	3.2537
pos_3037	His Ala Pro Met	metab_3030	yes	down	-	pos	-	455.208	2.77025	M+H	C19H30N6O5S	31.6	-	-	-	-	-	-	-	-	-	-	31.6	-	-	-	2.1081	2.0959	0.6778	0.01218	0.05682	2.9232	3.6415	2.5292	4.5338	4.3491	4.5326
pos_3077	Marmesin rutinoside	metab_3070	yes	up	-	pos	159650-11-0	555.206	2.88232	M+H	C26H34O13	-	62	HMDB0041413	-	-	-	-	-	Phenylpropanoids and polyketides	Coumarins and derivatives	Furanocoumarins	-	62	-	-	2.7487	2.7433	1.8548	0.0001349	0.00309	4.861	4.9695	4.8884	2.8288	2.7667	2.3404
pos_3125	Cuneatin methyl ether	metab_3118	yes	up	-	pos	-	327.086	3.0411	M+H	C18H14O6	52.4	-	LMPK12050088	-	-	-	-	-	-	-	-	52.4	-	-	-	2.1628	2.1476	9.9653	0.01835	0.07476	2.0917	0.917	2.1543	0.183	0.1788	0.1563
pos_3159	(+)-cis-5,6-Dihydro-5-hydroxy-4-methoxy-6-(2-phenylethyl)-2H-pyran-2-one	metab_3152	yes	down	-	pos	52247-81-1	249.112	3.17693	M+H	C14H16O4	37.2	-	HMDB0029575	-	-	-	-	-	Phenylpropanoids and polyketides	Kavalactones	Not Available	37.2	-	-	-	1.2591	1.2569	0.9185	0.003914	0.02726	5.6457	5.6166	5.4643	6.1019	6.1574	5.9539
pos_3173	Acteoside	metab_3166	yes	up	C10501	pos	61276-17-3	669.181	3.2	M+2Na-H	C29H36O15	-	49.8	HMDB0259785;HMDB0034843	-	-	-	-	-	Phenylpropanoids and polyketides	Cinnamic acids and derivatives	Hydroxycinnamic acids and derivatives	-	49.8	-	-	2.0478	2.0442	1.2947	2.471e-05	0.001085	5.4814	5.5861	5.4076	4.2235	4.2151	4.2867
pos_3189	5-(3,4,5-trihydroxyphenyl)pentanoic acid	metab_3182	yes	up	-	pos	-	475.158	3.26842	2M+Na	C11H14O5	-	32.8	-	-	-	-	-	-	-	-	-	-	32.8	-	-	1.5386	1.5334	1.2073	0.000318	0.005367	4.1025	4.0886	4.2288	3.5052	3.3594	3.4225
pos_3202	Neobanone	metab_3195	yes	up	-	pos	-	383.112	3.3141	M+H	C21H18O7	34.5	-	LMPK12060036	-	-	-	-	-	-	-	-	34.5	-	-	-	1.1719	1.1678	1.1381	0.007634	0.04184	3.6878	3.6389	3.5043	3.2815	3.045	3.1908
pos_3213	Isopentyl gentiobioside	metab_3206	yes	up	-	pos	178275-89-3	451.159	3.33705	M+K	C17H32O11	-	45.1	HMDB0041512	-	-	-	-	-	Lipids and lipid-like molecules	Fatty Acyls	Fatty acyl glycosides	-	45.1	-	-	1.372	1.365	1.1591	0.008032	0.04329	4.3193	4.233	4.5407	3.9196	3.646	3.7288
pos_3214	4',5,6-Trimethylscutellarein 7-glucoside	metab_3207	yes	up	-	pos	17680-85-2	473.142	3.33705	M+H-H2O	C24H26O11	-	46.1	HMDB0040512	-	-	-	-	-	Benzenoids	Anthracenes	Anthraquinones	-	46.1	-	-	1.4066	1.4006	1.1498	0.001806	0.01644	4.6082	4.5355	4.7893	4.1036	4.0036	4.0089
pos_3218	Benzylmalic acid	metab_3211	yes	up	-	pos	-	225.076	3.36	M+H	C11H12O5	49.1	-	-	-	-	-	-	-	-	-	-	49.1	-	-	-	1.1499	1.1468	1.0912	7.363e-05	0.00213	4.7083	4.7058	4.7577	4.3302	4.3007	4.3572
pos_3265	4-OH-Retinal	metab_3258	yes	down	-	pos	-	283.206	3.54203	M+H-H2O	C20H28O2	-	48.7	HMDB0012788	-	-	-	-	-	Lipids and lipid-like molecules	Prenol lipids	Retinoids	-	48.7	-	-	1.0766	1.07	0.916	0.02246	0.08452	4.2115	4.4416	4.0751	4.6563	4.6098	4.631
pos_3275	Fluocinolone Acetonide	metab_3268	yes	up	-	pos	-	475.194	3.5649	M+Na	C24H30F2O6	-	62.9	-	-	-	-	-	-	-	-	-	-	62.9	-	-	1.4845	1.4835	1.1656	0.005255	0.03283	4.9304	5.0181	4.7315	4.3649	4.1866	4.0432
pos_3311	N-cis-Feruloyltyramine	metab_3304	yes	up	-	pos	80510-09-4	314.139	3.7017	M+H	C18H19NO4	42.9	-	HMDB0036381	-	-	-	-	-	Phenylpropanoids and polyketides	Cinnamic acids and derivatives	Hydroxycinnamic acids and derivatives	42.9	-	-	-	2.0569	2.0547	1.3644	0.0007996	0.009854	4.6433	4.8918	4.91	3.5873	3.6871	3.314
pos_3321	Leukotriene A4	metab_3314	yes	down	C00909	pos	72059-45-1	283.206	3.74668	M+H-2H2O	C20H30O3	-	45.1	HMDB0001337;PW_C001030;LMFA03020023	Lipids	Eicosanoids	map00590;map01100	Metabolism;Metabolism	Lipid metabolism;Global and overview maps	Lipids and lipid-like molecules	Fatty Acyls	Fatty acids and conjugates	-	45.1	Arachidonic acid metabolism;Metabolic pathways	Arachidonic acid metabolism;Metabolic pathways	1.07	1.0665	0.9255	0.01668	0.07024	4.7044	4.8504	4.5756	5.1883	5.074	5.0049
pos_3424	7-keto DHEA	metab_3417	yes	down	-	pos	-	303.195	4.38253	M+H	C19H26O3	76.8	-	-	-	-	-	-	-	-	-	-	76.8	-	-	-	1.3008	1.2938	0.8885	0.02247	0.08452	4.5561	4.7712	4.2762	5.1177	4.9844	5.211
pos_3444	Gladiatoside C2	metab_3437	yes	up	-	pos	-	549.137	4.47343	M+H-H2O	C29H26O12	-	36.6	HMDB0036254	-	-	-	-	-	Phenylpropanoids and polyketides	Flavonoids	Flavonoid glycosides	-	36.6	-	-	1.7109	1.7055	1.4108	2.68e-05	0.00115	3.0178	2.9266	3.0208	2.1499	2.1375	2.0676
pos_3480	1-Methylnaphthalene	metab_3473	yes	down	C14082	pos	90-12-0	143.085	4.79158	M+H	C11H10	-	34.7	HMDB0032860	-	-	-	-	-	Benzenoids	Naphthalenes	Not Available	-	34.7	-	-	1.0602	1.0561	0.862	0.00946	0.04842	2.2715	2.3719	2.1432	2.697	2.5601	2.6136
pos_3486	12(S)-HPETE	metab_3479	yes	down	C05965	pos	67675-13-2;71774-10-2	359.219	4.81433	M+Na	C20H32O4	-	48.1	HMDB0004243;PW_C002105	-	-	map00590;map01100	Metabolism;Metabolism	Lipid metabolism;Global and overview maps	Lipids and lipid-like molecules	Fatty Acyls	Eicosanoids	-	48.1	Arachidonic acid metabolism;Metabolic pathways	Arachidonic acid metabolism;Metabolic pathways	1.9627	1.9533	0.7378	0.01564	0.06695	3.4623	4.1196	3.114	5.0228	4.8233	4.6507
pos_3492	4-Hydroxyderricin	metab_3485	yes	up	-	pos	-	339.159	4.8821	M+H	C21H22O4	32.1	-	LMPK12120041;HMDB0246454	-	-	-	-	-	Phenylpropanoids and polyketides	Linear 1,3-diarylpropanoids	Chalcones and dihydrochalcones	32.1	-	-	-	2.3555	2.3507	1.6944	0.0001492	0.003334	4.1158	4.095	3.9489	2.5027	2.4939	2.1805
pos_3691	(4Z,7Z,11E,13Z,16Z,19Z)-10-Hydroperoxydocosahexaenoic acid	metab_3684	yes	down	-	pos	121694-98-2	343.225	6.1889	M+H-H2O	C22H32O4	-	39.6	HMDB0062277	-	-	-	-	-	Lipids and lipid-like molecules	Fatty Acyls	Fatty acids and conjugates	-	39.6	-	-	2.1692	2.1659	0.6272	0.01928	0.07694	2.5646	2.8712	2.5392	4.9896	3.6092	4.1167
pos_3705	17-Hydroxymethylethisterone	metab_3698	yes	down	-	pos	-	360.253	6.29393	M+NH4	C22H30O3	-	38.6	HMDB0060710	-	-	-	-	-	Lipids and lipid-like molecules	Steroids and steroid derivatives	Androstane steroids	-	38.6	-	-	1.3608	1.356	0.9075	0.001226	0.01288	5.4975	5.6445	5.4569	6.1468	6.1235	6.0199
pos_3748	Palmyrolide A	metab_3741	yes	up	-	pos	-	338.267	6.56863	M+H	C20H35NO3	55.1	-	-	-	-	-	-	-	-	-	-	55.1	-	-	-	1.2353	1.2291	1.1002	0.002853	0.02218	5.2699	5.0328	5.2064	4.6825	4.6884	4.726
pos_3848	4-Hydroxyretinoic acid	metab_3841	yes	down	C16677	pos	66592-72-1	650.441	7.13862	2M+NH4	C20H28O3	-	75.1	HMDB0006254;PW_C002690	-	-	map01100	Metabolism	Global and overview maps	Lipids and lipid-like molecules	Prenol lipids	Retinoids	-	75.1	Metabolic pathways	Metabolic pathways	1.629	1.6244	0.7912	0.04512	0.1325	3.5009	3.9322	3.4447	5.1106	4.0909	4.5481
pos_3902	N-methylundec-10-enamide	metab_3895	yes	down	-	pos	-	198.185	7.37612	M+H	C12H23NO	30.2	-	-	-	-	-	-	-	-	-	-	30.2	-	-	-	1.376	1.3786	0.8484	0.01797	0.07361	3.6632	3.4526	3.5582	4.3987	4.2872	3.8956
pos_4062	1-Monopalmitin	metab_4055	yes	up	-	pos	32899-41-5	331.284	8.24047	M+H	C19H38O4	98	-	HMDB0245964;HMDB0011564	-	-	-	-	-	Lipids and lipid-like molecules	Glycerolipids	Monoradylglycerols	98	-	-	-	1.3319	1.3301	1.1051	0.004316	0.02916	5.9523	5.8361	5.7141	5.2581	5.4018	5.1758
pos_4078	Tauroursodeoxycholic acid	metab_4071	yes	up	C16868	pos	14605-22-2	541.335	8.34655	M+ACN+H	C26H45NO6S	-	65.5	LMST05040015;HMDB0000874	-	-	-	-	-	Lipids and lipid-like molecules	Steroids and steroid derivatives	Bile acids, alcohols and derivatives	-	65.5	-	-	1.2234	1.2217	1.1002	0.01909	0.07654	5.6479	5.6286	5.2617	5.0839	4.9436	5.005
pos_4230	Alpha-Amyrone	metab_4223	yes	down	-	pos	638-96-0	425.377	9.22197	M+H	C30H48O	52.7	-	HMDB0036659	-	-	-	-	-	Lipids and lipid-like molecules	Prenol lipids	Triterpenoids	52.7	-	-	-	1.1913	1.1887	0.9178	3.818e-05	0.001387	4.6987	4.7172	4.7493	5.1509	5.1154	5.1675
pos_4881	PC(16:0/18:1(11Z))	metab_4874	yes	up	C00157	pos	-	760.584	10.7684	M+H	C42H82NO8P	-	71.4	PW_C004020;LMGP01010576;HMDB0007971	Lipids	Phospholipids	map01100;map00564;map01110;map00590;map00591;map00592	Metabolism;Metabolism;Metabolism;Metabolism;Metabolism;Metabolism	Global and overview maps;Lipid metabolism;Global and overview maps;Lipid metabolism;Lipid metabolism;Lipid metabolism	Lipids and lipid-like molecules	Glycerophospholipids	Glycerophosphocholines	-	71.4	Metabolic pathways;Glycerophospholipid metabolism;Biosynthesis of secondary metabolites;Arachidonic acid metabolism;Linoleic acid metabolism;alpha-Linolenic acid metabolism	Metabolic pathways;Glycerophospholipid metabolism;Biosynthesis of secondary metabolites;Arachidonic acid metabolism;Linoleic acid metabolism;alpha-Linolenic acid metabolism	1.0917	1.0894	1.0563	0.0004703	0.007094	6.7156	6.7209	6.7658	6.3842	6.4218	6.3177
pos_4938	Cer(d16:2(4E,6E)/20:0(2OH))	metab_4931	yes	up	-	pos	-	580.53	9.92393	M+H	C36H69NO4	90.3	-	LMSP02010089	-	-	-	-	-	-	-	-	90.3	-	-	-	1.2494	1.2484	1.1018	0.001841	0.01654	5.2488	5.2602	5.1043	4.6413	4.7817	4.7473
pos_4958	DG(18:3(9Z,12Z,15Z)/16:0/0:0)	metab_4951	yes	up	C00165	pos	-	591.498	9.71402	M+H	C37H66O5	73.6	-	PW_C003352;HMDB0007301	-	-	-	-	-	Lipids and lipid-like molecules	Fatty Acyls	Lineolic acids and derivatives	73.6	-	-	-	1.443	1.4429	1.1544	0.00349	0.02524	4.8662	5.0483	4.6909	4.2482	4.1748	4.2281
pos_5511	Ascorbyl stearate	metab_5504	yes	down	-	pos	10605-09-1	460.327	7.98507	M+NH4	C24H42O7	-	34.2	HMDB0038242;LMFA07010789	-	-	-	-	-	Lipids and lipid-like molecules	Fatty Acyls	Fatty acid esters	-	34.2	-	-	1.6138	1.6128	0.7737	0.006117	0.03618	2.8408	2.8276	2.8154	3.781	3.8383	3.3443
pos_5749	(+/-)-(Z)-2-(5-Tetradecenyl)cyclobutanone	metab_5742	yes	up	-	pos	173074-85-6	306.279	7.3556	M+ACN+H	C18H32O	-	71	HMDB0037543	-	-	-	-	-	Organic oxygen compounds	Organooxygen compounds	Carbonyl compounds	-	71	-	-	1.052	1.0484	1.0669	0.007269	0.04056	5.6874	5.5762	5.5693	5.2798	5.1492	5.3481
pos_5776	Sphinganine	metab_5769	yes	up	C00836	pos	764-22-7	302.305	7.2911	M+H	C18H39NO2	92	-	LMSP01020001;HMDB0242634;HMDB0000269;PW_C000184	-	-	map00600;map01100	Metabolism;Metabolism	Lipid metabolism;Global and overview maps	Organic nitrogen compounds	Organonitrogen compounds	Amines	92	-	Sphingolipid metabolism;Metabolic pathways	Sphingolipid metabolism;Metabolic pathways	1.229	1.2301	1.0888	0.002026	0.01754	5.6369	5.8415	5.698	5.246	5.3052	5.2231
pos_5919	9(R)-HETE	metab_5912	yes	down	-	pos	-	303.231	6.8316	M+H-H2O	C20H32O3	57.5	-	-	-	-	-	-	-	-	-	-	57.5	-	-	-	1.4062	1.4011	0.8637	0.03196	0.1062	4.3051	4.6524	4.1028	5.3195	4.8975	4.9043
pos_5961	6-hydroxysphingosine	metab_5954	yes	up	-	pos	-	316.284	6.65675	M+H	C18H37NO3	56.3	-	LMSP01080003	-	-	-	-	-	-	-	-	56.3	-	-	-	1.0749	1.076	1.07	0.02204	0.08372	5.9764	5.9479	6.0109	5.4321	5.5373	5.7901
pos_5975	Alpha-Linolenoyl Ethanolamide	metab_5968	yes	up	C13828	pos	-	322.274	6.61318	M+H	C20H35NO2	81	-	HMDB0013624	-	-	-	-	-	Organic nitrogen compounds	Organonitrogen compounds	Amines	81	-	-	-	1.4495	1.4438	1.1588	0.005688	0.03462	5.0142	4.6788	4.8022	4.028	4.2047	4.2761
pos_6056	Megestrol	metab_6049	yes	down	C07120	pos	3562-63-8	346.237	6.29393	M+NH4	C21H28O3	-	48.4	HMDB0014495;LMST02030177	-	-	-	-	-	Lipids and lipid-like molecules	Steroids and steroid derivatives	Pregnane steroids	-	48.4	-	-	1.5189	1.5123	0.8807	0.001786	0.01639	5.1083	5.3833	5.1251	5.9621	5.9264	5.8454
pos_6059	(E,E)-11,13-Octadecadien-9-ynoic acid	metab_6052	yes	down	-	pos	-	241.195	6.29393	M+H-2H2O	C18H28O2	-	37.6	HMDB0034382	-	-	-	-	-	Lipids and lipid-like molecules	Fatty Acyls	Fatty acids and conjugates	-	37.6	-	-	1.2386	1.2342	0.9004	0.002091	0.01792	4.2493	4.3755	4.183	4.7936	4.7539	4.6742
pos_6061	Cadalene	metab_6054	yes	down	-	pos	-	199.148	6.29393	M+H	C15H18	51.2	-	HMDB0059698;LMPR0103330007	-	-	-	-	-	Lipids and lipid-like molecules	Prenol lipids	Sesquiterpenoids	51.2	-	-	-	1.55	1.5431	0.845	0.002426	0.01973	3.9365	4.2341	3.9143	4.8194	4.7788	4.7041
pos_6253	Herculin	metab_6246	yes	down	-	pos	-	269.259	5.63333	M+NH4	C16H29NO	-	61.6	LMFA08020180;HMDB0030275	-	-	-	-	-	Lipids and lipid-like molecules	Fatty Acyls	Fatty amides	-	61.6	-	-	1.1473	1.1486	0.8291	0.03511	0.1125	2.1204	2.1073	2.539	2.8055	2.6553	2.7019
pos_6293	3,4,5-trihydroxy-6-(3-phenylpropoxy)oxane-2-carboxylic acid	metab_6285	yes	down	-	pos	-	313.131	5.4877	M+H	C15H20O7	-	49.3	-	-	-	-	-	-	-	-	-	-	49.3	-	-	1.9074	1.896	0.6491	0.04843	0.1384	2.0245	3.2633	1.9992	4.1641	3.5344	3.5271
pos_6523	Palmitoleoyl Ethanolamide	metab_6514	yes	down	-	pos	94421-67-7	315.3	4.72365	M+NH4	C18H35NO2	-	44	HMDB0013648	-	-	-	-	-	Organic nitrogen compounds	Organonitrogen compounds	Amines	-	44	-	-	2.1365	2.1334	0.6185	0.0005247	0.007574	2.2519	2.2387	2.2266	3.7888	3.3519	3.7185
pos_6599	Delta-12-Prostaglandin J2	metab_6590	yes	down	C05958	pos	87893-54-7	357.203	4.40528	M+Na	C20H30O4	-	34.7	PW_C002100;LMFA03010020;HMDB0004238	-	-	map00590;map01100	Metabolism;Metabolism	Lipid metabolism;Global and overview maps	Lipids and lipid-like molecules	Fatty Acyls	Eicosanoids	-	34.7	Arachidonic acid metabolism;Metabolic pathways	Arachidonic acid metabolism;Metabolic pathways	1.2862	1.2797	0.8891	0.02612	0.09279	4.5318	4.7799	4.2535	5.1921	4.983	5.0821
pos_6602	Malvidin	metab_6593	yes	up	C08716	pos	643-84-5	331.081	4.40528	M+H	C17H14O7	76	-	LMPK12010004	-	-	-	-	-	-	-	-	76	-	-	-	1.7535	1.7519	1.2086	0.002151	0.01831	5.6114	5.6415	5.2734	4.4295	4.5995	4.646
pos_6618	Norfluoxetine	metab_6609	yes	up	-	pos	83891-03-6	337.154	4.33707	M+ACN+H	C16H16F3NO	-	38.8	PW_C040649;HMDB0060551	-	-	-	-	-	Benzenoids	Benzene and substituted derivatives	Trifluoromethylbenzenes	-	38.8	-	-	1.097	1.0954	1.0944	0.003196	0.02377	4.3137	4.4176	4.3116	4.0683	3.9193	3.9316
pos_6636	Negletein 6-[rhamnosyl-(1->2)-fucoside]	metab_6627	yes	up	C10023	pos	192224-98-9	621.15	4.26888	M+2Na-H	C28H32O13	-	91.8	HMDB0031991	-	-	-	-	-	Organoheterocyclic compounds	Benzopyrans	1-benzopyrans	-	91.8	-	-	1.508	1.5059	1.1879	0.0002166	0.004249	4.3322	4.3896	4.2295	3.6657	3.6533	3.5828
pos_6668	5,7-Dihydroxy-3-methoxyflavone	metab_6659	yes	up	C11577	pos	6665-74-3	317.102	4.15628	M+CH3OH+H	C16H12O5	-	30.1	HMDB0029522;LMPK12111654	-	-	-	-	-	Phenylpropanoids and polyketides	Flavonoids	O-methylated flavonoids	-	30.1	-	-	2.0967	2.0984	1.5186	0.01156	0.05499	4.1063	4.6322	3.8585	3.1938	2.7004	2.4002
pos_6699	Xi-3-(4-Isopropylphenyl)-2-methylpropanal	metab_6690	yes	down	-	pos	-	191.143	4.08833	M+H	C13H18O	57.2	-	HMDB0037763	-	-	-	-	-	Lipids and lipid-like molecules	Prenol lipids	Monoterpenoids	57.2	-	-	-	1.1618	1.1596	0.9026	0.001313	0.01343	3.8194	3.8447	3.7858	4.326	4.1714	4.191
pos_6702	Linalool oxide D 3-[apiosyl-(1->6)-glucoside]	metab_6693	yes	down	-	pos	-	465.229	4.06587	M+H	C21H36O11	-	74.9	HMDB0031367	-	-	-	-	-	Organic oxygen compounds	Organooxygen compounds	Carbohydrates and carbohydrate conjugates	-	74.9	-	-	3.211	3.2111	0.144	0.003177	0.02369	1.4955	0.0653	0.0636	4.0025	3.4205	3.8609
pos_6732	Robustigenin methyl ether	metab_6723	yes	up	-	pos	-	373.128	3.97472	M+H	C20H20O7	46.5	-	LMPK12050332	-	-	-	-	-	-	-	-	46.5	-	-	-	1.1387	1.1386	1.1421	0.003099	0.02344	3.1609	3.3333	3.2715	2.8262	2.7992	2.926
pos_6736	15(R)-PGE1	metab_6727	yes	down	-	pos	-	337.237	3.95185	M+H-H2O	C20H34O5	72.9	-	-	-	-	-	-	-	-	-	-	72.9	-	-	-	1.5111	1.5056	0.856	0.006402	0.03707	4.2553	4.5146	4.1246	5.1657	4.9948	4.9015
pos_6749	Valechlorin	metab_6740	yes	down	-	pos	51771-49-4	491.207	3.9063	M+CH3OH+H	C22H31ClO8	-	60.4	HMDB0041045	-	-	-	-	-	Lipids and lipid-like molecules	Prenol lipids	Monoterpenoids	-	60.4	-	-	2.2881	2.282	0.6575	0.002076	0.01787	3.1488	3.3499	2.7804	4.9012	4.8085	4.4009
pos_6770	Limocitrol 3-glucoside	metab_6761	yes	up	-	pos	77133-42-7	583.108	3.83782	M+2Na-H	C24H26O14	-	90.5	LMPK12113320;HMDB0037690	-	-	-	-	-	Phenylpropanoids and polyketides	Flavonoids	Flavonoid glycosides	-	90.5	-	-	2.6663	2.6593	1.7617	0.01768	0.07294	5.3935	5.4044	5.5696	4.1898	2.9935	2.1062
pos_6771	8-hydroxy-13,17-octadecadiene-9,11-diynoic acid	metab_6762	yes	down	-	pos	-	289.18	3.83782	M+H	C18H24O3	60.8	-	LMFA02000186	-	-	-	-	-	-	-	-	60.8	-	-	-	1.149	1.1446	0.9181	0.001335	0.01351	4.5312	4.5576	4.4228	4.8607	4.96	4.898
pos_6825	(+/-)-Naringenin	metab_6815	yes	up	-	pos	-	273.076	3.72447	M+H	C15H12O5	84.4	-	-	-	-	-	-	-	-	-	-	84.4	-	-	-	1.7778	1.7722	1.2526	0.001025	0.01147	4.726	4.7406	4.8179	4.0119	3.7417	3.6504
pos_6832	N-(p-Hydroxyphenyl)ethyl p-hydroxycinnamide	metab_6822	yes	up	-	pos	36417-86-4	284.128	3.7017	M+H	C17H17NO3	44.1	-	HMDB0039521	-	-	-	-	-	Phenylpropanoids and polyketides	Cinnamic acids and derivatives	Hydroxycinnamic acids and derivatives	44.1	-	-	-	2.0088	2.0007	1.3241	0.0006437	0.008697	5.0201	4.7477	5.1601	3.7675	3.814	3.6928
pos_6875	Isoacoramone	metab_6865	yes	up	-	pos	3904-18-5	225.112	3.61055	M+H	C12H16O4	59	-	HMDB0040629	-	-	-	-	-	Organic oxygen compounds	Organooxygen compounds	Carbonyl compounds	59	-	-	-	1.9359	1.932	1.2874	9.781e-06	0.0006451	5.0188	5.0372	4.915	3.8689	3.8994	3.8592
pos_6887	5'-(3'-methoxy-4'-hydroxyphenyl)-gamma-valerolactone	metab_6876	yes	up	-	pos	-	223.096	3.58777	M+H	C12H14O4	58.3	-	HMDB0029226	-	-	-	-	-	Benzenoids	Phenols	Methoxyphenols	58.3	-	-	-	2.3758	2.3704	1.4519	1.599e-06	0.0002509	5.4112	5.4206	5.3222	3.7436	3.7156	3.6693
pos_6964	Trp Pro His	metab_6952	yes	down	-	pos	-	439.213	3.45132	M+H	C22H26N6O4	37.3	-	-	-	-	-	-	-	-	-	-	37.3	-	-	-	2.2639	2.2498	0.6279	0.02688	0.09458	2.8198	3.8573	2.1664	4.8614	4.4192	4.8047
pos_6991	Isorhamnetin	metab_6979	yes	up	C10084	pos	480-19-3	317.065	3.40565	M+H	C16H12O7	84	-	HMDB0002655;LMPK12110002	-	-	-	-	-	Phenylpropanoids and polyketides	Flavonoids	Flavones	84	-	-	-	1.9395	1.9351	1.2681	2.281e-06	0.0002718	5.2521	5.2843	5.3117	4.178	4.1964	4.1238
pos_7005	1'-Acetoxychavicol acetate	metab_6993	yes	up	C10426	pos	151986-17-3;52946-22-2	235.096	3.38282	M+H	C13H14O4	53.6	-	HMDB0041005;HMDB0041006	-	-	-	-	-	Benzenoids	Phenol esters	Not Available	53.6	-	-	-	1.3187	1.3142	1.1451	6.672e-05	0.002001	4.1443	4.0429	4.0803	3.5745	3.561	3.5781
pos_7054	3-(2,5-dimethoxyphenyl)propanoic acid	metab_7042	yes	up	-	pos	-	211.097	3.2912	M+H	C11H14O4	74.7	-	-	-	-	-	-	-	-	-	-	74.7	-	-	-	1.1776	1.1743	1.098	6.422e-05	0.001966	4.6566	4.6079	4.6233	4.1913	4.2028	4.253
pos_7064	Osmanthuside A	metab_7052	yes	down	-	pos	97457-19-7	429.152	3.26842	M+H-H2O	C23H26O9	-	56.6	HMDB0038748	-	-	-	-	-	Phenylpropanoids and polyketides	Cinnamic acids and derivatives	Hydroxycinnamic acids and derivatives	-	56.6	-	-	1.7019	1.698	0.8327	5.092e-05	0.001728	4.2674	4.2589	4.3772	5.1108	5.1981	5.1858
pos_7069	4-Hydroxy-2H-pyran-3-carboxaldehyde	metab_7057	yes	up	-	pos	26110-68-9	275.055	3.26842	2M+Na	C6H6O3	-	58.2	HMDB0031256	-	-	-	-	-	Organoheterocyclic compounds	Pyrans	Not Available	-	58.2	-	-	2.0767	2.0713	1.5203	0.001575	0.01511	4.0505	3.7988	3.7292	2.4117	2.381	2.8234
pos_7071	Boviquinone 4	metab_7059	yes	down	-	pos	28129-52-4	207.138	3.26842	M+2H	C26H36O4	-	42.1	HMDB0030057	-	-	-	-	-	Lipids and lipid-like molecules	Prenol lipids	Diterpenoids	-	42.1	-	-	1.1362	1.1351	0.9094	0.001819	0.01644	3.9978	3.9764	4.0177	4.4913	4.3844	4.3095
pos_7078	Neoraufuracin	metab_7066	yes	down	-	pos	-	435.165	3.24553	M+H	C22H26O9	52.9	-	LMPK12130057	-	-	-	-	-	-	-	-	52.9	-	-	-	1.0964	1.0917	0.9272	0.002882	0.02235	4.7473	4.8151	4.6553	5.066	5.0897	5.1759
pos_7084	Patulin	metab_7072	yes	up	C16748	pos	149-29-1	137.023	3.24553	M+H-H2O	C7H6O4	-	53.4	HMDB0034299	-	-	-	-	-	Organoheterocyclic compounds	Pyrans	Not Available	-	53.4	-	-	1.9481	1.9427	1.3004	0.0003751	0.006002	4.8924	4.8977	5.0416	3.9361	3.8411	3.6298
pos_7140	3,4-Methylenedioxybenzoic acid	metab_7128	yes	up	-	pos	94-53-1	167.034	3.15433	M+H	C8H6O4	56.6	-	HMDB0032613	-	-	-	-	-	Organoheterocyclic compounds	Benzodioxoles	Not Available	56.6	-	-	-	1.6967	1.6912	1.281	0.0003084	0.005279	3.9612	3.8481	4.0183	3.1023	3.1589	2.9743
pos_7153	Quercetin	metab_7141	yes	up	C00389	pos	117-39-5	303.05	3.13162	M+H	C15H10O7	64.5	-	LMPK12110004;HMDB0005794	-	-	map01100;map00941;map01110;map00944	Metabolism;Metabolism;Metabolism;Metabolism	Global and overview maps;Biosynthesis of other secondary metabolites;Global and overview maps;Biosynthesis of other secondary metabolites	Phenylpropanoids and polyketides	Flavonoids	Flavones	64.5	-	Metabolic pathways;Flavonoid biosynthesis;Biosynthesis of secondary metabolites;Flavone and flavonol biosynthesis	Metabolic pathways;Flavonoid biosynthesis;Biosynthesis of secondary metabolites;Flavone and flavonol biosynthesis	2.6163	2.6096	1.5946	7.573e-06	0.0005673	5.4187	5.4227	5.5141	3.5098	3.4436	3.3038
pos_7268	L-beta-homoleucine	metab_7256	yes	up	-	pos	-	146.118	2.9726	M+H	C7H15NO2	33.4	-	-	-	-	-	-	-	-	-	-	33.4	-	-	-	1.6649	1.6601	1.2791	2.732e-05	0.001165	3.7459	3.7337	3.8492	2.9716	2.9497	2.9338
pos_7289	1,2-Disinapoylgentiobiose	metab_7277	yes	down	-	pos	-	777.221	2.92713	M+Na	C34H42O19	-	36.2	HMDB0030335	-	-	-	-	-	Phenylpropanoids and polyketides	Cinnamic acids and derivatives	Hydroxycinnamic acids and derivatives	-	36.2	-	-	1.4551	1.4525	0.8909	7.259e-05	0.002125	5.1397	5.1075	5.2288	5.7883	5.8096	5.7766
pos_7292	3-(2,5-dihydroxy-4-methoxyphenyl)-3,4-dihydro-2H-1-benzopyran-4,6,7-triol	metab_7280	yes	up	-	pos	-	641.186	2.92713	2M+H	C16H16O7	-	77.8	-	-	-	-	-	-	-	-	-	-	77.8	-	-	3.6966	3.6847	7.5929	0.0007101	0.009244	4.7219	4.714	4.8443	1.4966	0.2691	0.1152
pos_7321	(Z)-3-Oxo-2-(2-pentenyl)-1-cyclopenteneacetic acid	metab_7309	yes	down	-	pos	120282-76-0	241.143	2.90442	M+CH3OH+H	C12H16O3	-	40.9	HMDB0030197	-	-	-	-	-	Organic oxygen compounds	Organooxygen compounds	Carbonyl compounds	-	40.9	-	-	1.2527	1.2524	0.8964	0.001809	0.01644	4.2359	4.1285	4.1989	4.7833	4.643	4.5899
pos_7322	(R)-Bitalin A	metab_7310	yes	up	-	pos	35844-67-8	219.102	2.90442	M+H	C13H14O3	42.6	-	HMDB0040358	-	-	-	-	-	Benzenoids	Benzene and substituted derivatives	Acetophenones	42.6	-	-	-	1.5018	1.4971	1.1939	0.0004282	0.006628	4.1206	4.1352	4.2883	3.556	3.4402	3.51
pos_7343	Isochinomin	metab_7331	yes	up	-	pos	83118-66-5	895.192	2.85963	2M+Na	C20H20O11	-	39.1	HMDB0041147	-	-	-	-	-	Organoheterocyclic compounds	Benzopyrans	1-benzopyrans	-	39.1	-	-	2.9503	2.9424	1.7353	6.203e-05	0.001928	6.0584	6.0527	6.2595	3.7164	3.5944	3.2758
pos_7368	Phe Ile	metab_7356	yes	up	-	pos	-	279.17	2.83688	M+H	C15H22N2O3	71.4	-	-	-	-	-	-	-	-	-	-	71.4	-	-	-	1.542	1.5363	1.2536	0.00551	0.03379	3.6507	3.5652	3.878	3.0676	3.0326	2.7497
pos_7430	2,4-Dihydroxybenzoic acid	metab_7418	yes	up	C00230	pos	99-50-3;89-86-1	155.034	2.77025	M+H	C7H6O4	57.7	-	HMDB0029666;HMDB0001856	-	-	map01100;map01110	Metabolism;Metabolism	Global and overview maps;Global and overview maps	Benzenoids	Benzene and substituted derivatives	Benzoic acids and derivatives	57.7	-	Metabolic pathways;Biosynthesis of secondary metabolites	Metabolic pathways;Biosynthesis of secondary metabolites	2.3829	2.3762	1.6382	5.449e-06	0.0004674	4.3274	4.2397	4.4163	2.6249	2.6406	2.662
pos_7452	Cyanidin 3-(6''-acetylglucoside)	metab_7440	yes	up	-	pos	-	491.118	2.72525	M+H	C23H22O12	76.9	-	HMDB0301884;LMPK12010132	-	-	-	-	-	Phenylpropanoids and polyketides	Flavonoids	Flavonoid glycosides	76.9	-	-	-	3.5674	3.5577	3.7811	8.914e-07	0.0001993	5.1605	4.9974	5.2339	1.3876	1.3757	1.3084
pos_7463	Orsellinic acid	metab_7451	yes	up	C01839	pos	-	169.05	2.72525	M+H	C8H8O4	88.4	-	LMPK13010001	-	-	-	-	-	-	-	-	88.4	-	-	-	1.6286	1.6246	1.2462	0.0001377	0.003125	3.9633	3.9904	4.0893	3.2541	3.2671	3.1412
pos_7464	Asn Cys Lys Tyr	metab_7452	yes	down	-	pos	-	527.23	2.70265	M+H	C22H34N6O7S	57.3	-	-	-	-	-	-	-	-	-	-	57.3	-	-	-	1.8143	1.8063	0.7482	0.01087	0.0533	3.2532	3.4945	2.7385	4.2916	4.0678	4.3187
pos_7470	2-(3-Hydroxyphenyl)ethanol 1'-glucoside	metab_7458	yes	up	-	pos	-	323.11	2.70265	M+Na	C14H20O7	-	67.3	HMDB0038332	-	-	-	-	-	Organic oxygen compounds	Organooxygen compounds	Carbohydrates and carbohydrate conjugates	-	67.3	-	-	1.0177	1.0122	1.0781	0.003176	0.02369	4.4463	4.3381	4.4699	4.1532	4.0497	4.0912
pos_7495	Ile Phe	metab_7483	yes	up	-	pos	-	279.17	2.65757	M+H	C15H22N2O3	53.1	-	-	-	-	-	-	-	-	-	-	53.1	-	-	-	1.1849	1.1785	1.1401	0.009826	0.04968	3.645	3.5534	3.8077	3.3367	3.1227	3.1945
pos_7501	Eriodictyol 7-(6-galloylglucoside)	metab_7489	yes	up	-	pos	-	585.124	2.63507	M+H-H2O	C28H26O15	-	49.2	HMDB0039921	-	-	-	-	-	Phenylpropanoids and polyketides	Flavonoids	Flavonoid glycosides	-	49.2	-	-	3.3134	3.3063	2.4636	3.054e-06	0.0003363	5.4401	5.5138	5.5143	2.0864	2.2216	2.376
pos_7507	Isoeugenitin	metab_7495	yes	up	-	pos	519-18-6	238.107	2.63507	M+NH4	C12H12O4	-	56.4	HMDB0029473	-	-	-	-	-	Organoheterocyclic compounds	Benzopyrans	1-benzopyrans	-	56.4	-	-	1.0198	1.0222	1.1121	0.0103	0.05125	3.3127	3.5055	3.2682	3.0422	3.0326	2.9947
pos_7509	4,8-dihydroxy-2H-furo[2,3-h]chromen-2-one	metab_7497	yes	up	-	pos	-	219.029	2.63507	M+H	C11H6O5	-	53.7	-	-	-	-	-	-	-	-	-	-	53.7	-	-	2.0532	2.044	1.4919	0.001061	0.01175	4.1588	3.6522	3.8264	2.6321	2.6197	2.5494
pos_7512	3,4,5-trihydroxy-6-{3-[(5-oxooxolan-2-yl)methyl]phenoxy}oxane-2-carboxylic acid	metab_7500	yes	up	-	pos	-	759.213	2.61247	2M+Na	C17H20O9	-	48.6	-	-	-	-	-	-	-	-	-	-	48.6	-	-	2.4556	2.4477	1.5653	0.0001277	0.003	5.0102	4.931	5.0194	3.4258	3.0661	3.0654
pos_7515	Trans-Caffeic acid [apiosyl-(1->6)-glucosyl] ester	metab_7503	yes	up	-	pos	-	497.129	2.61247	M+Na	C20H26O13	-	63	HMDB0033694	-	-	-	-	-	Phenylpropanoids and polyketides	Cinnamic acids and derivatives	Hydroxycinnamic acids and derivatives	-	63	-	-	2.0712	2.0618	1.3979	0.00146	0.01442	4.8939	4.3213	4.5689	3.2393	3.2976	3.3244
pos_7518	Dictyoquinazol C	metab_7506	yes	up	-	pos	-	381.081	2.61247	M+K	C18H18N2O5	-	58.6	HMDB0040442	-	-	-	-	-	Organoheterocyclic compounds	Diazanaphthalenes	Benzodiazines	-	58.6	-	-	2.0555	2.0449	1.475	0.00516	0.03245	4.4263	3.8118	4.0844	3.0452	2.8119	2.4971
pos_7527	Malonyldaidzin	metab_7515	yes	up	C16191	pos	124590-31-4	503.116	2.58998	M+H	C24H22O12	42.4	-	HMDB0041263	-	-	-	-	-	Phenylpropanoids and polyketides	Coumarins and derivatives	Furanocoumarins	42.4	-	-	-	2.7669	2.7592	1.8177	0.0004672	0.007094	5.1675	5.0617	5.1487	3.161	2.8826	2.4156
pos_7579	Val Glu Leu	metab_7567	yes	down	-	pos	-	360.213	2.5	M+H	C16H29N3O6	75.6	-	-	-	-	-	-	-	-	-	-	75.6	-	-	-	1.5769	1.5798	0.7131	0.0262	0.09283	2.2375	1.7093	2.4669	3.019	3.1762	2.7982
pos_7602	Val Gly Phe	metab_7590	yes	down	-	pos	-	322.176	2.45618	M+H	C16H23N3O4	53.6	-	-	-	-	-	-	-	-	-	-	53.6	-	-	-	2.0001	1.9968	0.6229	0.0005747	0.008115	2.2272	1.9461	1.8258	3.1747	3.1959	3.2626
pos_7608	Nomilin	metab_7596	yes	up	C08773	pos	1063-77-0	497.218	2.43397	M+H-H2O	C28H34O9	-	55.1	HMDB0035772	-	-	-	-	-	Lipids and lipid-like molecules	Prenol lipids	Triterpenoids	-	55.1	-	-	1.2591	1.2612	1.1231	0.0158	0.06746	4.7393	5.0093	4.7274	4.207	4.1983	4.4839
pos_7610	Kaempferol-3-O-alpha-L-arabinoside	metab_7598	yes	up	-	pos	-	419.097	2.43397	M+H	C20H18O10	97.5	-	-	-	-	-	-	-	-	-	-	97.5	-	-	-	3.0939	3.0845	2.1026	0.0006273	0.008522	5.5076	5.5004	5.5368	3.2051	2.4379	2.2265
pos_7652	Tyr Pro His	metab_7640	yes	down	-	pos	-	416.192	2.34803	M+H	C20H25N5O5	37.9	-	-	-	-	-	-	-	-	-	-	37.9	-	-	-	1.5862	1.5831	0.6951	0.01058	0.05215	2.1493	1.8415	1.5997	2.5558	2.8414	2.6415
pos_7660	2-Phenylbutyrolactone	metab_7648	yes	up	-	pos	-	163.075	2.34803	M+H	C10H10O2	71.5	-	-	-	-	-	-	-	-	-	-	71.5	-	-	-	1.0651	1.0627	1.0972	0.001019	0.01144	3.9148	3.915	3.8552	3.6145	3.5415	3.4941
pos_7665	6-(3-hydroxybut-1-en-1-yl)-7-methoxy-2H-chromen-2-one	metab_7653	yes	up	-	pos	-	556.194	2.32748	2M+ACN+Na	C14H14O4	-	36.2	-	-	-	-	-	-	-	-	-	-	36.2	-	-	1.5571	1.5549	1.1985	0.0006811	0.009021	4.3866	4.4462	4.4996	3.5689	3.7618	3.7933
pos_7670	Myristoylglycine	metab_7658	yes	down	-	pos	-	303.264	2.32748	M+NH4	C16H31NO3	-	57.6	HMDB0013250	-	-	-	-	-	Organic acids and derivatives	Carboxylic acids and derivatives	Amino acids, peptides, and analogues	-	57.6	-	-	2.1503	2.1506	0.6219	0.005484	0.03372	2.943	2.1559	2.1391	3.9696	3.8328	3.8381
pos_7672	3-(5-Methyl-2-furyl)prop-2-enal	metab_7660	yes	up	-	pos	5555-90-8	137.06	2.32748	M+H	C8H8O2	-	39.7	HMDB0032400	-	-	-	-	-	Organoheterocyclic compounds	Heteroaromatic compounds	Not Available	-	39.7	-	-	1.5021	1.4977	1.1486	3.12e-05	0.001243	5.1751	5.1505	5.2319	4.5477	4.5214	4.4748
pos_7674	Diosmin	metab_7662	yes	up	C10039	pos	520-27-4	609.181	2.30553	M+H	C28H32O15	69.4	-	HMDB0029548	-	-	-	-	-	Phenylpropanoids and polyketides	Flavonoids	Flavonoid glycosides	69.4	-	-	-	2.6663	2.6613	1.6529	0.0001104	0.002705	5.4369	5.4452	5.2874	3.0433	3.2456	3.4952
pos_7675	(-)-Epigallocatechin 3-glucuronide	metab_7663	yes	up	-	pos	-	465.103	2.30553	M+H-H2O	C21H22O13	-	75.7	HMDB0041639	-	-	-	-	-	Phenylpropanoids and polyketides	Flavonoids	Flavonoid glycosides	-	75.7	-	-	2.822	2.813	2.1354	1.435e-05	0.0008014	4.5549	4.2956	4.4878	2.1764	2.0691	1.9993
pos_7683	ETHYL SYRINGATE	metab_7671	yes	up	-	pos	-	227.091	2.30553	M+H	C11H14O5	66.6	-	-	-	-	-	-	-	-	-	-	66.6	-	-	-	1.0643	1.058	1.0877	0.008721	0.04577	4.5921	4.3406	4.4979	4.1087	4.0891	4.149
pos_7690	Genistin	metab_7678	yes	up	-	pos	529-59-9	433.113	2.28422	M+H	C21H20O10	80.5	-	LMPK12050166;HMDB0033988	-	-	-	-	-	Phenylpropanoids and polyketides	Isoflavonoids	Isoflavonoid O-glycosides	80.5	-	-	-	3.3583	3.3505	2.558	7.222e-08	4.441e-05	5.4441	5.5155	5.516	2.1788	2.1664	2.0965
pos_7724	NESS 0327	metab_7712	yes	up	-	pos	-	489.1	2.21967	M+H	C24H23Cl3N4O	34.9	-	-	-	-	-	-	-	-	-	-	34.9	-	-	-	2.8981	2.8902	1.8326	0.00501	0.03203	5.8164	5.7636	5.8272	4.0012	3.1257	2.3718
pos_7725	3,4,5,2',4',6'-Hexahydroxychalcone 2'-glucoside	metab_7713	yes	up	-	pos	-	467.119	2.21967	M+H	C21H22O12	39.4	-	LMPK12120279	-	-	-	-	-	-	-	-	39.4	-	-	-	2.8497	2.8412	1.8159	0.0002119	0.004173	5.4057	5.3729	5.466	3.3429	2.89	2.7135
pos_7729	DIHYDROROBINETIN	metab_7717	yes	up	-	pos	-	305.065	2.21967	M+H	C15H12O7	57.4	-	-	-	-	-	-	-	-	-	-	57.4	-	-	-	3.075	3.0649	1.8296	0.0006505	0.008772	6.3011	6.2589	6.3441	4.0351	3.1724	3.1255
pos_7732	3R-aminononanoic acid	metab_7720	yes	down	-	pos	-	174.149	2.21967	M+H	C9H19NO2	58	-	LMFA01100019	-	-	-	-	-	-	-	-	58	-	-	-	1.5267	1.524	0.7501	0.0434	0.1297	2.8825	2.6888	1.9731	3.5096	3.2874	3.2627
pos_7743	5,7-octadienoic acid	metab_7731	yes	down	-	pos	-	141.091	2.19847	M+H	C8H12O2	39	-	LMFA01030442	-	-	-	-	-	-	-	-	39	-	-	-	1.0331	1.0334	0.9152	0.005983	0.03567	3.6995	3.6363	3.6714	4.0969	4.0375	3.8913
pos_7759	Ser Trp	metab_7747	yes	down	-	pos	-	292.129	2.15398	M+H	C14H17N3O4	78	-	-	-	-	-	-	-	-	-	-	78	-	-	-	1.0283	1.0236	0.8871	0.02948	0.1003	2.822	3.0421	2.6916	3.2602	3.2487	3.1369
pos_7764	Graveobioside B	metab_7752	yes	up	-	pos	33579-63-4	595.166	2.13353	M+H	C27H30O15	30.5	-	HMDB0037454	-	-	-	-	-	Phenylpropanoids and polyketides	Flavonoids	Flavonoid glycosides	30.5	-	-	-	1.6359	1.6337	1.1597	0.0001247	0.002958	5.8482	5.8951	5.7314	5.0058	5.0716	4.9918
pos_7767	7,4',5'-Trihydroxy-5,2'-oxido-4-phenylcoumarin	metab_7755	yes	up	-	pos	-	285.039	2.13353	M+H	C15H8O6	59.4	-	LMPK12100060	-	-	-	-	-	-	-	-	59.4	-	-	-	3.456	3.4447	4.2315	0.003549	0.02547	4.8619	4.8276	4.8962	2.3227	0.8081	0.3176
pos_7770	Quercetin 3-(3-p-coumaroylglucoside)	metab_7758	yes	down	-	pos	76211-70-6	593.129	2.11117	M+H-H2O	C30H26O14	-	65.2	HMDB0037365	-	-	-	-	-	Phenylpropanoids and polyketides	Flavonoids	Flavonoid glycosides	-	65.2	-	-	3.1464	3.1414	0.3868	0.0007737	0.00974	2.4404	1.8569	1.3979	5.1291	4.899	4.6935
pos_7783	Cyanidin	metab_7771	yes	up	C05905	pos	13306-05-3;528-58-5	287.055	2.08933	M+H	C15H10O6	84.5	-	LMPK12010002;HMDB0244184;HMDB0002708	-	-	map01100;map00942;map00941;map01110	Metabolism;Metabolism;Metabolism;Metabolism	Global and overview maps;Biosynthesis of other secondary metabolites;Biosynthesis of other secondary metabolites;Global and overview maps	Organoheterocyclic compounds	Triazines	1,3,5-triazines	84.5	-	Metabolic pathways;Anthocyanin biosynthesis;Flavonoid biosynthesis;Biosynthesis of secondary metabolites	Metabolic pathways;Anthocyanin biosynthesis;Flavonoid biosynthesis;Biosynthesis of secondary metabolites	2.5701	2.5622	1.4135	0.001279	0.01323	6.8754	6.8509	6.9163	5.3395	4.7697	4.4954
pos_7806	N17-Dimethylindole-3-carboxaldehyde	metab_7793	yes	up	-	pos	-	174.091	2.04663	M+H	C11H11NO	44.5	-	-	-	-	-	-	-	-	-	-	44.5	-	-	-	1.0524	1.0552	1.1073	0.02001	0.07856	3.8452	4.0659	3.7282	3.4765	3.5055	3.5308
pos_7808	Cadabicine methyl ether	metab_7795	yes	down	-	pos	-	472.218	2.025	M+Na	C26H31N3O4	-	65.5	HMDB0039857	-	-	-	-	-	Phenylpropanoids and polyketides	Flavonoids	Flavonoid glycosides	-	65.5	-	-	1.4029	1.3951	0.8652	0.003272	0.02416	3.8419	4.0708	3.8156	4.4136	4.5548	4.5854
pos_7809	Taraxinic acid glucosyl ester	metab_7796	yes	down	-	pos	75911-14-7	442.207	2.025	M+NH4	C21H28O9	-	43	HMDB0035249	-	-	-	-	-	Lipids and lipid-like molecules	Prenol lipids	Terpene lactones	-	43	-	-	1.1275	1.1214	0.911	0.009146	0.04728	4.1864	4.2882	4.0226	4.4993	4.5924	4.626
pos_7814	4-Hydroxy-benzenepropanedioate	metab_7801	yes	up	-	pos	-	197.044	2.025	M+H	C9H8O5	-	43.7	HMDB0059809	-	-	-	-	-	Benzenoids	Phenol esters	Not Available	-	43.7	-	-	1.9732	1.9668	1.3945	0.005509	0.03379	4.615	4.1194	4.2888	2.7792	3.3518	3.209
pos_7838	Dihydrozeatin riboside	metab_7825	yes	up	C16447	pos	-	354.177	1.96328	M+H	C15H23N5O5	53.7	-	-	-	-	map01110;map00908	Metabolism;Metabolism	Global and overview maps;Metabolism of terpenoids and polyketides	-	-	-	53.7	-	Biosynthesis of secondary metabolites;Zeatin biosynthesis	Biosynthesis of secondary metabolites;Zeatin biosynthesis	2.4346	2.4295	2.2825	0.0058	0.03496	3.7075	3.1985	3.1041	1.0491	1.3048	2.032
pos_7848	Isoorientin 2''-[feruloyl-(->6)-glucoside]	metab_7834	yes	up	-	pos	220948-75-4	751.185	1.94112	M+H-2H2O	C37H38O19	-	75.4	HMDB0032911	-	-	-	-	-	Lignans, neolignans and related compounds	Lignan glycosides	Not Available	-	75.4	-	-	3.4121	3.403	2.9811	2.958e-07	0.0001221	5.2687	5.1137	5.1965	1.7732	1.7609	1.6917
pos_7874	2-(2,4-dihydroxyphenyl)-2-oxoacetic acid	metab_7860	yes	up	-	pos	-	165.018	1.92117	M+H-H2O	C8H6O5	-	44.5	-	-	-	-	-	-	-	-	-	-	44.5	-	-	2.6157	2.6075	2.3019	1.231e-05	0.0007489	3.6923	3.4498	3.6316	1.591	1.5789	1.5104
pos_7899	Gravacridonetriol	metab_7885	yes	up	-	pos	59086-94-1	399.154	1.87857	M+ACN+H	C19H19NO6	-	81.5	HMDB0029330	-	-	-	-	-	Organoheterocyclic compounds	Quinolines and derivatives	Benzoquinolines	-	81.5	-	-	2.3777	2.3751	1.7523	0.001711	0.01588	4.0012	4.0852	4.0717	1.8846	2.3769	2.6778
pos_7953	Flaviolin	metab_7939	yes	up	C18012	pos	479-05-0	207.029	1.83447	M+H	C10H6O5	63.5	-	-	-	-	-	-	-	-	-	-	63.5	-	-	-	1.7764	1.7711	1.3306	1.392e-05	0.0007926	3.812	3.7224	3.7773	2.8653	2.8528	2.7825
pos_7964	3'-Glucosyl-2',4',6'-trihydroxyacetophenone	metab_7950	yes	up	-	pos	88885-07-8	353.084	1.8122	M+Na	C14H18O9	-	37	HMDB0040621	-	-	-	-	-	Organic oxygen compounds	Organooxygen compounds	Carbohydrates and carbohydrate conjugates	-	37	-	-	2.6135	2.6074	1.8871	9.872e-05	0.002547	4.2673	4.4189	4.347	2.4077	2.0563	2.4429
pos_7966	Hydroxypentobarbital	metab_7952	yes	up	-	pos	-	243.134	1.8122	M+H	C11H18N2O4	30.3	-	-	-	-	-	-	-	-	-	-	30.3	-	-	-	1.0207	1.0192	1.0834	0.005377	0.03336	4.2259	4.311	4.2812	4.0472	3.9227	3.8621
pos_7984	Thr Leu	metab_7970	yes	up	-	pos	-	233.149	1.79115	M+H	C10H20N2O4	85	-	-	-	-	-	-	-	-	-	-	85	-	-	-	1.0601	1.0604	1.09	0.001681	0.01571	4.165	4.2569	4.1496	3.8698	3.8826	3.7822
pos_7999	N6,N6-Dimethyladenosine	metab_7985	yes	up	C03416	pos	2620-62-4	296.135	1.76857	M+H	C12H17N5O4	72.9	-	-	-	-	-	-	-	-	-	-	72.9	-	-	-	1.3364	1.3336	1.1696	0.0004849	0.007211	3.6375	3.7079	3.8087	3.1739	3.2067	3.155
pos_8033	2-Keto-glutaramic acid	metab_8018	yes	up	C00940	pos	18465-19-5	308.106	1.72755	2M+NH4	C5H7NO4	-	68	HMDB0001552	-	-	map01100;map00250	Metabolism;Metabolism	Global and overview maps;Amino acid metabolism	Organic acids and derivatives	Keto acids and derivatives	Short-chain keto acids and derivatives	-	68	Metabolic pathways;Alanine, aspartate and glutamate metabolism	Metabolic pathways;Alanine, aspartate and glutamate metabolism	2.1137	2.1088	1.5126	0.0009884	0.01124	3.9927	4.0486	3.9899	2.7286	2.3498	2.8741
pos_8090	Glu Met	metab_8075	yes	up	-	pos	-	279.101	1.66558	M+H	C10H18N2O5S	44.6	-	-	-	-	-	-	-	-	-	-	44.6	-	-	-	1.8524	1.8543	1.704	0.007085	0.03984	2.6315	2.7469	2.5663	1.6473	1.8602	1.155
pos_8130	2-(4-Methyl-5-thiazolyl)ethyl formate	metab_8115	yes	up	-	pos	90731-56-9	213.069	1.64665	M+ACN+H	C7H9NO2S	-	43.7	HMDB0032420	-	-	-	-	-	Organoheterocyclic compounds	Azoles	Thiazoles	-	43.7	-	-	2.4449	2.4397	1.5777	0.0001189	0.002886	4.7802	5.0105	4.8665	3.2588	2.9148	3.1161
pos_8172	5-Acetyl-2,3-dihydro-1H-pyrrolizine	metab_8157	yes	up	-	pos	55041-85-5	150.091	1.604	M+H	C9H11NO	-	30.5	HMDB0040051	-	-	-	-	-	Organoheterocyclic compounds	Pyrrolizines	Not Available	-	30.5	-	-	1.7803	1.7779	1.2793	0.0003041	0.005229	4.4131	4.411	4.2862	3.3527	3.5553	3.3396
pos_8263	Semilepidinoside B	metab_8248	yes	up	-	pos	-	430.157	1.41967	M+ACN+Na	C17H22N2O7	-	56.7	HMDB0033108	-	-	-	-	-	Organic oxygen compounds	Organooxygen compounds	Carbohydrates and carbohydrate conjugates	-	56.7	-	-	1.1719	1.163	1.1451	0.02259	0.08475	3.7246	3.4763	3.7133	3.3746	3.0709	3.0865
pos_8355	1-(3-Methylbutanoyl)-6-apiosylglucose	metab_8340	yes	up	-	pos	467242-31-5	438.197	1.18488	M+ACN+H	C16H28O11	-	40.7	HMDB0039953	-	-	-	-	-	Lipids and lipid-like molecules	Fatty Acyls	Fatty acyl glycosides	-	40.7	-	-	4.1345	4.123	23.8157	1.025e-05	0.0006573	5.368	5.2554	5.2741	0.5837	0.0452	0.0387
pos_8447	1-Kestose	metab_8431	yes	up	C03661	pos	470-69-9	527.158	0.957567	M+Na	C18H32O16	86.2	-	HMDB0011729	-	-	-	-	-	Organic oxygen compounds	Organooxygen compounds	Carbohydrates and carbohydrate conjugates	86.2	-	-	-	1.0955	1.094	1.0688	0.0005004	0.00733	5.6045	5.6409	5.6679	5.2217	5.3258	5.2764
pos_8474	Tranexamic Acid	metab_8458	yes	down	C12535	pos	1197-18-8	190.144	0.939317	M+CH3OH+H	C8H15NO2	-	33.5	PW_C008836;HMDB0014447	-	-	-	-	-	Organic acids and derivatives	Carboxylic acids and derivatives	Amino acids, peptides, and analogues	-	33.5	-	-	1.0622	1.0592	0.9247	0.0001881	0.003867	4.1415	4.1818	4.1331	4.5162	4.5048	4.4494
pos_8673	L-NMMA	metab_8657	yes	up	C03884	pos	17035-90-4	189.135	0.6338	M+H	C7H16N4O2	67.5	-	HMDB0029416	-	-	-	-	-	Organic acids and derivatives	Carboxylic acids and derivatives	Amino acids, peptides, and analogues	67.5	-	-	-	1.1323	1.1309	1.0885	0.0007255	0.00934	4.8004	4.7932	4.7536	4.3358	4.4675	4.3761
pos_8785	1,4,5,8-TETRAHYDROXY-2,6-DIMETHYLANTHROQUINONE	metab_8768	yes	up	-	pos	-	301.073	0.5364	M+H	C16H12O6	66.5	-	-	-	-	-	-	-	-	-	-	66.5	-	-	-	1.081	1.0826	1.1469	0.01108	0.05378	2.9181	3.1092	2.9443	2.5303	2.5652	2.7288
pos_551	Cyclophosphamide	metab_8994	yes	up	C07888	pos	50-18-0;6055-19-2	261.03	0.51605	M+H-H2O, M+H	C7H15Cl2N2O2P	-	32.1	HMDB0014672;PW_C009028	-	-	-	-	-	Organic nitrogen compounds	Organonitrogen compounds	Nitrogen mustard compounds	-	32.1	-	-	1.6197	1.6147	1.1817	0.000827	0.01008	5.2582	5.1793	5.0894	4.4465	4.2339	4.4598
pos_7793	Epicatechin	metab_8996	yes	down	C09727;C06562	pos	490-46-0;154-23-4	291.086	2.0689	M+H	C15H14O6	83.2	-	HMDB0001871;LMPK12020003;HMDB0002780	-	-	map01100;map00941;map01110	Metabolism;Metabolism;Metabolism	Global and overview maps;Biosynthesis of other secondary metabolites;Global and overview maps	Phenylpropanoids and polyketides	Flavonoids	Flavans	83.2	-	Metabolic pathways;Flavonoid biosynthesis;Biosynthesis of secondary metabolites	Metabolic pathways;Flavonoid biosynthesis;Biosynthesis of secondary metabolites	1.2308	1.2326	0.8861	0.03776	0.1185	4.148	4.1085	4.3402	5.0465	4.674	4.498
neg_11	Glucodistylin	metab_9016	yes	up	-	neg	27297-45-6	465.104	2.06765	M-H, 2M-H, M+Cl, M-H2O-H	C21H22O12	-	66.3	HMDB0041597	-	-	-	-	-	Phenylpropanoids and polyketides	Flavonoids	Flavonoid glycosides	-	66.3	-	-	2.1788	2.1767	1.3614	0.0002448	0.002487	7.4597	7.4663	7.5168	5.7932	5.4451	5.248
neg_51	Zingerone glucoside	metab_9054	yes	up	-	neg	64703-96-4	401.145	2.31362	M+Cl, M+FA-H, M-H	C17H24O8	-	34.5	HMDB0040558	-	-	-	-	-	Organic oxygen compounds	Organooxygen compounds	Carbohydrates and carbohydrate conjugates	-	34.5	-	-	1.5227	1.5215	1.2906	2.606e-06	0.0001272	4.2486	4.227	4.3014	3.3186	3.2808	3.3011
neg_100	Chorismate	metab_9103	yes	up	C00251	neg	617-12-9	451.089	2.54185	M+Na-2H, 2M-H, M-H2O-H	C10H10O6	-	58.3	HMDB0012199	-	-	map01100;map01110;map01240;map00130;map00998;map01230;map00790;map00400	Metabolism;Metabolism;Metabolism;Metabolism;Metabolism;Metabolism;Metabolism;Metabolism	Global and overview maps;Global and overview maps;Global and overview maps;Metabolism of cofactors and vitamins;Biosynthesis of other secondary metabolites;Global and overview maps;Metabolism of cofactors and vitamins;Amino acid metabolism	Organic acids and derivatives	Carboxylic acids and derivatives	Dicarboxylic acids and derivatives	-	58.3	Metabolic pathways;Biosynthesis of secondary metabolites;Biosynthesis of cofactors;Ubiquinone and other terpenoid-quinone biosynthesis;Biosynthesis of various secondary metabolites - part 2;Biosynthesis of amino acids;Folate biosynthesis;Phenylalanine, tyrosine and tryptophan biosynthesis	Metabolic pathways;Biosynthesis of secondary metabolites;Biosynthesis of cofactors;Ubiquinone and other terpenoid-quinone biosynthesis;Biosynthesis of various secondary metabolites - part 2;Biosynthesis of amino acids;Folate biosynthesis;Phenylalanine, tyrosine and tryptophan biosynthesis	2.1109	2.1088	1.6114	4.559e-05	0.0008419	4.8045	4.9979	4.8258	3.1685	3.0021	2.9088
neg_104	Cymorcin monoglucoside	metab_9107	yes	up	-	neg	76859-62-6	327.145	2.65607	M-H, M+Cl, M+FA-H	C16H24O7	-	37	HMDB0029777	-	-	-	-	-	Organic oxygen compounds	Organooxygen compounds	Carbohydrates and carbohydrate conjugates	-	37	-	-	1.3411	1.3392	1.2459	0.002655	0.01127	3.8525	3.9234	3.9876	3.2066	2.9342	3.2998
neg_113	(+/-)-Taxifolin	metab_9116	yes	up	-	neg	149418-37-1	303.051	3.05855	M-H, M+Na-2H, M-H2O-H	C15H12O7	73.7	-	HMDB0040894	-	-	-	-	-	Phenylpropanoids and polyketides	Stilbenes	Not Available	73.7	-	-	-	1.4413	1.4404	1.1679	0.0001144	0.001505	6.113	5.9613	5.9987	5.2284	5.1312	5.1158
neg_124	Beta-D-Xylopyranosyl-(1->5)-alpha-L-arabinofuranosyl-(1->3)-L-arabinose	metab_9126	yes	down	-	neg	7268-42-0	827.268	1.43808	M+Cl, M+FA-H, 2M-H	C15H26O13	-	36.7	HMDB0038859	-	-	-	-	-	Organic oxygen compounds	Organooxygen compounds	Carbohydrates and carbohydrate conjugates	-	36.7	-	-	1.0468	1.0479	0.8751	0.008676	0.02524	3.3325	3.6137	3.3699	3.8901	4.0325	3.8659
neg_135	Azaleatin 3-glucoside	metab_9137	yes	up	-	neg	-	477.104	1.63925	M-H, M+Cl, M-H2O-H	C22H22O12	-	62.6	LMPK12112542;HMDB0037360	-	-	-	-	-	Phenylpropanoids and polyketides	Flavonoids	Flavonoid glycosides	-	62.6	-	-	1.9614	1.9612	1.7173	0.001252	0.00718	4.203	3.7872	3.7808	2.4021	2.4577	1.9954
neg_315	Thiomorpholine 3-carboxylate	metab_9317	yes	up	C03901	neg	20960-92-3	353.088	1.70663	M+FA-H, 2M+Hac-H	C5H9NO2S	-	32.8	HMDB0059611	-	-	-	-	-	Organic acids and derivatives	Carboxylic acids and derivatives	Amino acids, peptides, and analogues	-	32.8	-	-	1.6819	1.6811	1.3735	4.166e-05	0.0007922	4.4165	4.2232	4.3345	3.1755	3.1696	3.1034
neg_327	Gallic acid	metab_9329	yes	up	C01424	neg	149-91-7	169.013	1.75215	M-H2O-H, M-H	C7H6O5	35.6	-	HMDB0005807	-	-	-	-	-	Benzenoids	Benzene and substituted derivatives	Benzoic acids and derivatives	35.6	-	-	-	1.7721	1.7711	1.3427	0.0001632	0.001916	5.3019	5.0459	5.0645	3.9122	3.8211	3.7449
neg_334	6-Caffeoylsucrose	metab_9336	yes	down	-	neg	-	503.141	1.77495	M-H, M+FA-H	C21H28O14	-	66.4	HMDB0035486	-	-	-	-	-	Organic oxygen compounds	Organooxygen compounds	Carbohydrates and carbohydrate conjugates	-	66.4	-	-	1.1228	1.127	0.8771	0.0475	0.08357	4.3213	4.8089	4.5006	4.9241	5.5153	5.1043
neg_403	Homoveratric acid	metab_9405	yes	up	-	neg	93-40-3	195.065	2.0893	M-H, M+Na-2H	C10H12O4	36	-	HMDB0000434	-	-	-	-	-	Benzenoids	Benzene and substituted derivatives	Methoxybenzenes	36	-	-	-	1.1135	1.1123	1.1573	0.0003758	0.003334	3.8032	3.7974	3.8756	3.3619	3.2293	3.3253
neg_418	Safflomin A	metab_9420	yes	up	-	neg	146087-19-6;78281-02-4	593.151	2.11192	M-H2O-H, M-H	C27H32O16	-	34.7	HMDB0040677;HMDB0030558	-	-	-	-	-	Phenylpropanoids and polyketides	Cinnamic acids and derivatives	Hydroxycinnamic acids and derivatives	-	34.7	-	-	1.2611	1.2606	1.1408	0.0002746	0.002713	5.3877	5.4798	5.3161	4.6847	4.7826	4.7189
neg_430	2-(3,4,5-trihydroxyphenyl)-3,4-dihydro-2H-1-benzopyran-3,4,5,7-tetrol	metab_9432	yes	up	-	neg	-	303.051	2.24608	M-H2O-H, M+Na-2H	C15H14O8	-	52.2	-	-	-	-	-	-	-	-	-	-	52.2	-	-	1.3883	1.3865	1.1929	0.005093	0.01753	5.1897	5.2337	5.2511	4.678	4.1924	4.2707
neg_444	Irilone 4'-glucoside	metab_9446	yes	up	-	neg	50868-47-8	441.083	2.31362	M-H2O-H, M+FA-H	C22H20O11	-	40.9	HMDB0033818	-	-	-	-	-	Phenylpropanoids and polyketides	Isoflavonoids	Isoflavonoid O-glycosides	-	40.9	-	-	1.2263	1.2255	1.148	0.0002924	0.002834	4.8871	4.8469	4.9309	4.3316	4.2736	4.1695
neg_474	(-)-erythro-Anethole glycol 2-glucoside	metab_9476	yes	up	-	neg	217973-39-2	343.14	2.47328	M-H, M+Cl	C16H24O8	-	50.8	HMDB0033067	-	-	-	-	-	Organic oxygen compounds	Organooxygen compounds	Carbohydrates and carbohydrate conjugates	-	50.8	-	-	1.9254	1.923	1.5268	0.0001341	0.001679	4.3829	4.5236	4.5185	2.9675	2.7481	3.0766
neg_476	Austdiol	metab_9478	yes	up	-	neg	53043-28-0	235.061	2.496	M-H, M+Na-2H	C12H12O5	-	72.2	HMDB0030858	-	-	-	-	-	Organoheterocyclic compounds	Azaphilones	Not Available	-	72.2	-	-	1.0753	1.0746	1.1489	0.004174	0.01526	3.9162	3.8551	3.8938	3.262	3.3448	3.5447
neg_500	Astilbin	metab_9502	yes	up	C17449	neg	29838-67-3	495.115	2.61043	M-H, M+FA-H	C21H22O11	-	66.3	HMDB0242667;HMDB0033850	-	-	-	-	-	Phenylpropanoids and polyketides	Flavonoids	Flavonoid glycosides	-	66.3	-	-	2.0118	2.0105	1.4782	0.0002901	0.002826	5.4288	5.0787	5.2204	3.7417	3.4054	3.4942
neg_523	2-O-Benzoyl-D-glucose	metab_9525	yes	up	-	neg	63029-01-6	329.088	2.74795	M+Na-2H, M+FA-H	C13H16O7	-	77.4	HMDB0034618	-	-	-	-	-	Organic oxygen compounds	Organooxygen compounds	Carbohydrates and carbohydrate conjugates	-	77.4	-	-	1.8538	1.8518	1.4178	0.0005205	0.004075	4.8428	4.8685	5.002	3.7238	3.345	3.308
neg_576	Gamma-delta-Dioxovaleric acid	metab_9578	yes	up	C02800	neg	-	151.003	3.0362	M+Na-2H, 2M+FA-H	C5H6O4	-	55.9	HMDB0013233	-	-	map00860	Metabolism	Metabolism of cofactors and vitamins	Organic acids and derivatives	Keto acids and derivatives	Gamma-keto acids and derivatives	-	55.9	Porphyrin and chlorophyll metabolism	Porphyrin and chlorophyll metabolism	1.8016	1.8004	1.4049	1.151e-05	0.0003325	4.7378	4.5999	4.6522	3.3766	3.3036	3.276
neg_578	3,4,5-trihydroxy-6-[2-(2-hydroxybenzoyloxy)phenoxy]oxane-2-carboxylic acid	metab_9580	yes	up	-	neg	-	451.088	3.05855	M-H, M+FA-H	C19H18O10	-	58.3	-	-	-	-	-	-	-	-	-	-	58.3	-	-	2.5079	2.5064	2.1983	1.414e-05	0.0003809	4.6874	4.8802	4.7709	2.0822	2.3451	2.0934
neg_676	5-(3',4',5'-Trihydroxyphenyl)-gamma-valerolactone-3'-O-glucuronide	metab_9678	yes	up	-	neg	-	437.052	3.1937	M+Na-2H, M+K-2H	C17H20O11	-	30.2	HMDB0059984	-	-	-	-	-	Organic oxygen compounds	Organooxygen compounds	Carbohydrates and carbohydrate conjugates	-	30.2	-	-	2.0532	2.0511	1.4871	5.752e-05	0.0009762	5.3166	5.3638	5.3654	3.7907	3.5019	3.4998
neg_723	2-(3,5-dihydroxyphenyl)-3,5,6,7-tetrahydroxy-3,4-dihydro-2H-1-benzopyran-4-one	metab_9725	yes	up	-	neg	-	319.046	2.77092	M-H, M+Na-2H	C15H12O8	-	78.8	-	-	-	-	-	-	-	-	-	-	78.8	-	-	2.4626	2.4604	1.8567	7.567e-05	0.001168	5.4611	5.3688	5.5676	3.2228	2.8194	2.7888
neg_771	Gentisein	metab_9773	yes	up	C10065	neg	529-49-7	289.036	2.47328	M+FA-H, 2M+FA-H	C13H8O5	-	64.1	HMDB0029463	-	-	-	-	-	Organoheterocyclic compounds	Benzopyrans	1-benzopyrans	-	64.1	-	-	2.2522	2.2505	1.8635	3.803e-05	0.0007461	4.5281	4.5144	4.5933	2.591	2.4853	2.2421
neg_830	Isovalerylglutamic acid	metab_9831	yes	down	-	neg	80154-63-8	266.082	5.8778	M+Na-2H, M+Cl	C10H17NO5	-	40.1	HMDB0000726	-	-	-	-	-	Organic acids and derivatives	Carboxylic acids and derivatives	Amino acids, peptides, and analogues	-	40.1	-	-	1.5809	1.5817	0.7443	0.00304	0.01236	2.9834	3.329	3.1453	4.4919	4.026	4.1911
neg_874	3,5,6,7-tetrahydroxy-2-(4-hydroxy-3-methoxyphenyl)-8aH-chromen-8a-yl	metab_9875	yes	up	-	neg	-	299.056	2.2909	M-H2O-H, M-H	C16H14O7	-	60.9	-	-	-	-	-	-	-	-	-	-	60.9	-	-	1.9605	1.9584	1.4749	0.0001858	0.002075	4.9695	4.9845	5.0005	3.6213	3.2668	3.2532
neg_1094	Oxoadipic acid	metab_10095	yes	up	C00322	neg	3184-35-8	181.013	2.023	M+Na-2H, 3M-H	C6H8O5	-	48.5	PW_C000150;LMFA01170121;HMDB0000225	Organic acids	Carboxylic acids	map01100;map00310;map01110;map00300;map01240;map01210;map01230;map00380	Metabolism;Metabolism;Metabolism;Metabolism;Metabolism;Metabolism;Metabolism;Metabolism	Global and overview maps;Amino acid metabolism;Global and overview maps;Amino acid metabolism;Global and overview maps;Global and overview maps;Global and overview maps;Amino acid metabolism	Organic acids and derivatives	Keto acids and derivatives	Medium-chain keto acids and derivatives	-	48.5	Metabolic pathways;Lysine degradation;Biosynthesis of secondary metabolites;Lysine biosynthesis;Biosynthesis of cofactors;2-Oxocarboxylic acid metabolism;Biosynthesis of amino acids;Tryptophan metabolism	Metabolic pathways;Lysine degradation;Biosynthesis of secondary metabolites;Lysine biosynthesis;Biosynthesis of cofactors;2-Oxocarboxylic acid metabolism;Biosynthesis of amino acids;Tryptophan metabolism	1.5208	1.5196	1.5274	0.01688	0.04112	3.1754	3.0137	3.1081	2.5502	1.8699	1.6666
neg_1111	Fluorocitric acid	metab_10112	yes	up	-	neg	-	190.998	1.93463	M-H2O-H, M-H	C6H7FO7	-	44	-	-	-	-	-	-	-	-	-	-	44	-	-	1.9273	1.9258	1.7516	0.0005327	0.004123	3.7427	3.5611	3.6305	1.939	1.9334	2.3708
neg_1369	Cis-Aconitic Acid	metab_10370	yes	up	C00417	neg	585-84-2	173.008	0.698933	M-H, M-H2O-H	C6H6O6	62.3	-	PW_C000051;HMDB0000072	Organic acids	Carboxylic acids	map01100;map00630;map01110;map01210;map00020;map00660	Metabolism;Metabolism;Metabolism;Metabolism;Metabolism;Metabolism	Global and overview maps;Carbohydrate metabolism;Global and overview maps;Global and overview maps;Carbohydrate metabolism;Carbohydrate metabolism	Organic acids and derivatives	Carboxylic acids and derivatives	Tricarboxylic acids and derivatives	62.3	-	Metabolic pathways;Glyoxylate and dicarboxylate metabolism;Biosynthesis of secondary metabolites;2-Oxocarboxylic acid metabolism;Citrate cycle (TCA cycle);C5-Branched dibasic acid metabolism	Metabolic pathways;Glyoxylate and dicarboxylate metabolism;Biosynthesis of secondary metabolites;2-Oxocarboxylic acid metabolism;Citrate cycle (TCA cycle);C5-Branched dibasic acid metabolism	1.2463	1.2455	1.1396	0.004285	0.01554	5.6937	5.4914	5.4162	5.0174	4.789	4.7603
neg_1618	3-(3-methylbut-2-en-1-yl)-4-(sulfooxy)benzoic acid	metab_10619	yes	up	-	neg	-	571.092	0.75995	2M-H	C12H14O6S	-	36.6	-	-	-	-	-	-	-	-	-	-	36.6	-	-	1.3354	1.3348	1.1923	0.0004552	0.003777	4.7872	4.6009	4.566	3.8872	3.879	3.9374
neg_1773	1-O-alpha-D-Glucopyranosyl-D-mannitol	metab_10774	yes	down	-	neg	20942-99-8	325.114	1.45982	M-H2O-H	C12H24O11	-	54.3	HMDB0029911;LMFA13010063	-	-	-	-	-	Lipids and lipid-like molecules	Fatty Acyls	Fatty acyl glycosides	-	54.3	-	-	1.0437	1.0429	0.9006	0.0003132	0.002982	4.1047	4.1662	4.1187	4.5911	4.6436	4.5241
neg_1829	5-Hydroxy-L-tryptophan	metab_10830	yes	down	C00643	neg	4350-09-08	219.077	1.61653	M-H	C11H12N2O3	-	63.3	PW_C000358;HMDB0000472	-	-	map01100;map00380	Metabolism;Metabolism	Global and overview maps;Amino acid metabolism	Organoheterocyclic compounds	Indoles and derivatives	Tryptamines and derivatives	-	63.3	Metabolic pathways;Tryptophan metabolism	Metabolic pathways;Tryptophan metabolism	1.0486	1.0484	0.8861	0.0006257	0.004567	3.5242	3.6335	3.6648	4.059	4.0424	4.1136
neg_1852	2,3,5-trihydroxy-6-(hydroxymethyl)oxan-4-yl 3,4,5-trihydroxybenzoate	metab_10853	yes	up	-	neg	-	331.067	1.63925	M-H	C13H16O10	-	64.6	-	-	-	-	-	-	-	-	-	-	64.6	-	-	1.2817	1.2824	1.1822	0.005053	0.01744	4.7747	4.4406	4.8396	4.0262	3.9682	3.8945
neg_1871	N-Acetylcystathionine	metab_10872	yes	up	-	neg	20619-80-1	527.152	1.66145	2M-H	C9H16N2O5S	-	37.6	HMDB0002381	-	-	-	-	-	Organic acids and derivatives	Carboxylic acids and derivatives	Amino acids, peptides, and analogues	-	37.6	-	-	1.9541	1.9532	1.575	7.888e-05	0.001187	4.3091	4.3413	4.4133	2.5853	2.8814	2.829
neg_1994	N-Benzoylaspartic acid	metab_10994	yes	up	-	neg	4631-12-03	282.062	1.86652	M+FA-H	C11H11NO5	-	62.1	HMDB0034251	-	-	-	-	-	Organic acids and derivatives	Carboxylic acids and derivatives	Amino acids, peptides, and analogues	-	62.1	-	-	2.2662	2.2641	1.8719	3.324e-05	0.0006817	4.6358	4.5766	4.5072	2.6358	2.333	2.3592
neg_2019	Cinnamtannin B2	metab_11019	yes	down	C17629	neg	88038-12-4	575.12	1.88938	M-2H	C60H48O24	-	34	HMDB0037668	-	-	-	-	-	Lipids and lipid-like molecules	Prenol lipids	Monoterpenoids	-	34	-	-	2.6622	2.6602	0.4635	1.343e-05	0.0003661	2.6487	2.6327	2.3265	5.5565	5.4537	5.406
neg_2026	4,6,7-trihydroxy-2H-chromen-2-one	metab_11026	yes	up	-	neg	-	193.013	1.91197	M-H	C9H6O5	-	65.7	-	-	-	-	-	-	-	-	-	-	65.7	-	-	1.7798	1.7784	1.3916	4.458e-06	0.0001915	4.6585	4.6184	4.6995	3.4087	3.3263	3.3097
neg_2031	Palatinose	metab_11031	yes	up	C01742	neg	13718-94-0	323.098	1.91197	M-H2O-H	C12H22O11	46.1	-	HMDB0256083	Carbohydrates	Oligosaccharides	-	-	-	Organic oxygen compounds	Organooxygen compounds	Carbohydrates and carbohydrate conjugates	46.1	-	-	-	1.5586	1.5585	1.3173	0.001366	0.007503	4.5132	4.0904	4.2982	3.2335	3.2048	3.3559
neg_2049	Cinnamtannin A2	metab_11049	yes	down	C17625	neg	86631-38-1	576.127	1.93463	M-2H	C60H50O24	-	49.9	HMDB0037661	-	-	-	-	-	Phenylpropanoids and polyketides	Flavonoids	Biflavonoids and polyflavonoids	-	49.9	-	-	3.2342	3.232	0.1962	1.414e-06	8.808e-05	1.0661	1.0656	1.0371	5.5709	5.2872	5.2853
neg_2094	1,2,6,8-Tetrahydroxy-3-methylanthraquinone 2-O-b-D-glucoside	metab_11094	yes	up	-	neg	-	493.099	2.00155	M+FA-H	C21H20O11	-	55.2	HMDB0032903	-	-	-	-	-	Benzenoids	Anthracenes	Anthraquinones	-	55.2	-	-	2.3627	2.3613	1.97	0.0001575	0.001879	4.6967	4.6962	4.8037	2.0837	2.4897	2.6325
neg_2113	Cinnamtannin II	metab_11113	yes	down	C17626	neg	86631-39-2	720.159	2.023	M-2H	C75H62O30	-	54.4	HMDB0037659	-	-	-	-	-	Phenylpropanoids and polyketides	Flavonoids	Biflavonoids and polyflavonoids	-	54.4	-	-	3.4321	3.4297	0.1235	2.746e-07	3.654e-05	0.6942	0.6937	0.6689	5.6934	5.4666	5.4998
neg_2116	3-O-p-Coumaroylquinic acid	metab_11116	yes	up	-	neg	-	337.093	2.04542	M-H	C16H18O8	-	69.2	HMDB0029681	-	-	-	-	-	Organic oxygen compounds	Organooxygen compounds	Alcohols and polyols	-	69.2	-	-	1.7767	1.7754	1.3654	0.000364	0.003268	5.0113	4.8096	5.0195	3.8006	3.469	3.5983
neg_2119	Kojic acid	metab_11119	yes	up	C14516	neg	501-30-4	163.003	2.06765	M+Na-2H	C6H6O4	-	36	HMDB0032923;HMDB0258034	-	-	-	-	-	Organoheterocyclic compounds	Pyrans	Pyranones and derivatives	-	36	-	-	2.0711	2.0693	1.626	4.808e-05	0.0008727	4.5808	4.6311	4.6663	2.9944	2.8623	2.6773
neg_2122	6-Hydroxyluteolin	metab_11122	yes	up	C10072	neg	18003-33-3	301.035	2.06765	M-H	C15H10O7	-	50.5	LMPK12111229;HMDB0036632	-	-	-	-	-	Phenylpropanoids and polyketides	Flavonoids	Flavones	-	50.5	-	-	2.2848	2.2826	1.6948	0.0005748	0.004345	5.3441	5.3507	5.3966	3.5807	3.086	2.8293
neg_2129	6-[(1Z)-2-hydroxy-3-oxobut-1-en-1-yl]-7-methoxy-2H-chromen-2-one	metab_11129	yes	up	-	neg	-	241.05	2.0893	M-H2O-H	C14H12O5	-	74.2	-	-	-	-	-	-	-	-	-	-	74.2	-	-	2.5276	2.5248	2.636	4.63e-05	0.0008478	4.2416	4.2674	4.3105	1.7438	1.3441	1.7763
neg_2130	Luteolin	metab_11130	yes	up	C01514	neg	491-70-3	285.041	2.0893	M-H	C15H10O6	49.4	-	LMPK12110006;HMDB0005800	-	-	map01100;map00941;map01110;map00944	Metabolism;Metabolism;Metabolism;Metabolism	Global and overview maps;Biosynthesis of other secondary metabolites;Global and overview maps;Biosynthesis of other secondary metabolites	Phenylpropanoids and polyketides	Flavonoids	Flavones	49.4	-	Metabolic pathways;Flavonoid biosynthesis;Biosynthesis of secondary metabolites;Flavone and flavonol biosynthesis	Metabolic pathways;Flavonoid biosynthesis;Biosynthesis of secondary metabolites;Flavone and flavonol biosynthesis	2.2813	2.279	1.6577	0.001267	0.007247	5.5486	5.5639	5.6205	3.8865	3.2402	2.9671
neg_2132	EMODIC ACID	metab_11132	yes	up	-	neg	-	299.02	2.0893	M-H	C15H8O7	39.8	-	-	-	-	-	-	-	-	-	-	39.8	-	-	-	2.8533	2.851	3.1218	9.106e-08	2.06e-05	4.9241	4.9347	4.9859	1.6486	1.5616	1.5451
neg_2134	D-Erythroascorbic acid 1'-a-D-glucoside	metab_11134	yes	up	-	neg	174339-86-7	345.025	2.0893	M+K-2H	C11H16O10	-	70.3	HMDB0033627	-	-	-	-	-	Organic oxygen compounds	Organooxygen compounds	Carbohydrates and carbohydrate conjugates	-	70.3	-	-	2.4306	2.4292	2.6976	1.167e-05	0.0003356	4.0466	3.7307	3.8917	1.4571	1.4422	1.4259
neg_2169	A-L-Fucopyranosyl-(1->2)-b-D-galactopyranosyl-(1->2)-D-xylose	metab_11169	yes	up	-	neg	130136-27-5	495.115	2.1562	M+K-2H	C17H30O14	-	87.8	HMDB0041222	-	-	-	-	-	Organic oxygen compounds	Organooxygen compounds	Carbohydrates and carbohydrate conjugates	-	87.8	-	-	2.4265	2.4267	2.3502	0.0004729	0.00384	4.5856	4.1413	4.2182	1.658	2.2222	1.6264
neg_2181	Gamma-Diosphenol	metab_11181	yes	down	-	neg	54783-36-7	213.113	2.20167	M+FA-H	C10H16O2	-	38.5	HMDB0037014	-	-	-	-	-	Lipids and lipid-like molecules	Prenol lipids	Monoterpenoids	-	38.5	-	-	2.0781	2.0758	0.4872	0.001615	0.00829	1.7528	1.7523	1.7483	3.8023	3.8703	3.1104
neg_2203	D-1-Deoxy-erythro-hexo-2,3-diulose	metab_11203	yes	up	-	neg	-	183.029	2.24608	M+Na-2H	C6H10O5	-	65.2	HMDB0029934	-	-	-	-	-	Organic oxygen compounds	Organooxygen compounds	Carbohydrates and carbohydrate conjugates	-	65.2	-	-	1.8832	1.8821	1.5048	5.826e-06	0.0002247	4.4436	4.3178	4.3743	2.9337	2.9436	2.8537
neg_2236	Citrusin D	metab_11236	yes	up	-	neg	65995-51-9	341.124	2.33608	M-H	C16H22O8	-	67	HMDB0039334	-	-	-	-	-	Lipids and lipid-like molecules	Fatty Acyls	Fatty acyl glycosides	-	67	-	-	2.2847	2.2827	2.5356	4.685e-06	0.0001971	3.5215	3.6902	3.4829	1.4212	1.4064	1.3901
neg_2249	Gentiobiosyl 2-methyl-6-oxo-2E,4E-heptadienoate	metab_11249	yes	down	-	neg	-	459.151	2.3586	M-H2O-H	C20H30O13	-	37.6	HMDB0032134	-	-	-	-	-	Organic oxygen compounds	Organooxygen compounds	Carbohydrates and carbohydrate conjugates	-	37.6	-	-	1.0005	1.0009	0.9018	0.007657	0.02299	4.0457	4.249	4.0264	4.4844	4.5144	4.6618
neg_2293	Alloathyriol	metab_11293	yes	up	-	neg	67370-97-2	319.046	2.45027	M+FA-H	C14H10O6	-	77.6	HMDB0038715	-	-	-	-	-	Organoheterocyclic compounds	Benzopyrans	1-benzopyrans	-	77.6	-	-	2.3793	2.3775	1.8246	3.254e-05	0.0006734	5.2831	5.1243	5.1916	3.0446	2.8185	2.6883
neg_2303	Camelliaside B	metab_11303	yes	up	-	neg	131573-90-5	763.151	2.45027	M+K-2H	C32H38O19	-	69	HMDB0038767;LMPK12111750	-	-	-	-	-	Phenylpropanoids and polyketides	Flavonoids	Flavonoid glycosides	-	69	-	-	2.905	2.9032	2.619	3.232e-05	0.000673	5.6169	5.6692	5.7093	2.282	2.3734	1.8322
neg_2306	5-Hydroxyvalproic acid	metab_11306	yes	up	C16650	neg	53660-23-4	181.086	2.47328	M+Na-2H	C8H16O3	-	42.4	PW_C008640;HMDB0013898	-	-	-	-	-	Lipids and lipid-like molecules	Fatty Acyls	Fatty acids and conjugates	-	42.4	-	-	1.7821	1.7801	1.5306	3.085e-05	0.0006564	3.7033	3.8744	3.8186	2.5574	2.4466	2.4422
neg_2320	(-)-Shikimic acid	metab_11320	yes	up	C00493	neg	138-59-0	173.045	2.496	M-H	C7H10O5	65.7	-	HMDB0003070	-	-	map01100;map00400;map01110;map01230;map01240	Metabolism;Metabolism;Metabolism;Metabolism;Metabolism	Global and overview maps;Amino acid metabolism;Global and overview maps;Global and overview maps;Global and overview maps	Organic oxygen compounds	Organooxygen compounds	Alcohols and polyols	65.7	-	Metabolic pathways;Phenylalanine, tyrosine and tryptophan biosynthesis;Biosynthesis of secondary metabolites;Biosynthesis of amino acids;Biosynthesis of cofactors	Metabolic pathways;Phenylalanine, tyrosine and tryptophan biosynthesis;Biosynthesis of secondary metabolites;Biosynthesis of amino acids;Biosynthesis of cofactors	1.1742	1.1735	1.1761	0.0002004	0.002169	3.8878	3.7786	3.8726	3.3187	3.2214	3.2704
neg_2377	3,4,5-trihydroxy-6-(2-methoxybenzoyloxy)oxane-2-carboxylic acid	metab_11377	yes	up	-	neg	-	349.057	2.58732	M+Na-2H	C14H16O9	-	66.8	-	-	-	-	-	-	-	-	-	-	66.8	-	-	2.3878	2.3858	2.4444	2.033e-05	0.0004947	4.0246	3.9136	4.0597	1.8191	1.5526	1.5362
neg_2386	7-hydroxy-1-oxo-1H-isochromene-3-carboxylic acid	metab_11386	yes	up	-	neg	-	205.014	2.61043	M-H	C10H6O5	-	61.9	-	-	-	-	-	-	-	-	-	-	61.9	-	-	1.7607	1.7586	1.431	3.734e-05	0.0007406	4.1814	4.3274	4.3012	3.0589	2.8996	2.9942
neg_2404	Cymorcin diglucoside	metab_11404	yes	up	-	neg	-	489.198	2.63327	M-H	C22H34O12	-	48.3	HMDB0039386	-	-	-	-	-	Organic oxygen compounds	Organooxygen compounds	Carbohydrates and carbohydrate conjugates	-	48.3	-	-	2.3701	2.3683	2.2233	1.491e-06	9.036e-05	4.2011	4.1458	4.319	1.9151	1.8998	1.8831
neg_2484	2-Cinnamoyl-1,6-digalloyl-beta-D-glucopyranose	metab_11484	yes	up	-	neg	94356-17-9	635.105	2.77092	M+Na-2H	C29H26O15	-	42.1	HMDB0039192	-	-	-	-	-	Phenylpropanoids and polyketides	Tannins	Not Available	-	42.1	-	-	2.6732	2.6703	2.3145	0.0004454	0.003728	5.2993	5.2071	5.3454	2.8242	1.89	2.1342
neg_2506	(S)-Multifidol 2-[apiosyl-(1->6)-glucoside]	metab_11506	yes	up	-	neg	467437-62-3	485.167	2.81658	M-H2O-H	C22H32O13	-	73	HMDB0039930	-	-	-	-	-	Organic oxygen compounds	Organooxygen compounds	Carbohydrates and carbohydrate conjugates	-	73	-	-	1.5692	1.5675	1.3414	0.002073	0.009716	4.1452	4.1211	4.1803	3.3861	2.9773	2.9159
neg_2508	7-Hydroxy-2-methyl-4-oxo-4H-1-benzopyran-5-carboxylic acid	metab_11508	yes	up	-	neg	-	219.029	2.83958	M-H	C11H8O5	-	73.5	HMDB0036346	-	-	-	-	-	Organoheterocyclic compounds	Benzopyrans	1-benzopyrans	-	73.5	-	-	1.8514	1.8494	1.4188	3.158e-05	0.0006677	4.8071	4.8698	4.7662	3.5156	3.3341	3.3291
neg_2547	Tamarixetin	metab_11547	yes	up	C10188	neg	603-61-2	363.072	2.90813	M+FA-H	C16H14O7	-	54.5	LMPK12110606;HMDB0002937	-	-	-	-	-	Phenylpropanoids and polyketides	Flavonoids	O-methylated flavonoids	-	54.5	-	-	2.7479	2.7449	4.6437	0.003411	0.01329	4.21	4.0778	4.2257	1.9473	0.3786	0.3689
neg_2591	5-Hydroxyconiferyl alcohol	metab_11591	yes	up	C12205	neg	1782-47-4	391.14	2.9984	2M-H	C10H12O4	-	53.9	HMDB0060398	-	-	map00940;map01110	Metabolism;Metabolism	Biosynthesis of other secondary metabolites;Global and overview maps	Benzenoids	Phenols	Methoxyphenols	-	53.9	Phenylpropanoid biosynthesis;Biosynthesis of secondary metabolites	Phenylpropanoid biosynthesis;Biosynthesis of secondary metabolites	2.0063	2.0054	1.8157	0.0008431	0.005557	3.6662	3.6104	4.102	1.8734	2.2129	2.1801
neg_2654	Quercetin-3-glucoside	metab_11654	yes	up	C05623	neg	482-35-9	463.089	3.1481	M-H	C21H20O12	97.1	-	HMDB0037362;HMDB0247252	-	-	map01100;map01110;map00944	Metabolism;Metabolism;Metabolism	Global and overview maps;Global and overview maps;Biosynthesis of other secondary metabolites	Phenylpropanoids and polyketides	Flavonoids	Flavonoid glycosides	97.1	-	Metabolic pathways;Biosynthesis of secondary metabolites;Flavone and flavonol biosynthesis	Metabolic pathways;Biosynthesis of secondary metabolites;Flavone and flavonol biosynthesis	2.344	2.3416	1.6381	2.739e-05	0.0005982	5.8009	5.8356	5.9083	3.7647	3.4267	3.5194
neg_2707	Matairesinol	metab_11707	yes	up	C10682	neg	580-72-3	357.134	3.26223	M-H	C20H22O6	36	-	HMDB0035698	-	-	map01100;map01110;map00998	Metabolism;Metabolism;Metabolism	Global and overview maps;Global and overview maps;Biosynthesis of other secondary metabolites	Lignans, neolignans and related compounds	Furanoid lignans	Tetrahydrofuran lignans	36	-	Metabolic pathways;Biosynthesis of secondary metabolites;Biosynthesis of various secondary metabolites - part 2	Metabolic pathways;Biosynthesis of secondary metabolites;Biosynthesis of various secondary metabolites - part 2	1.5511	1.55	1.4224	0.00437	0.01574	3.7504	3.4894	3.3774	2.3512	2.3384	2.7744
neg_2759	3,8-Dihydroxy-9-methoxycoumestan	metab_11759	yes	up	-	neg	-	343.046	3.37632	M+FA-H	C16H10O6	-	79.5	HMDB0030562	-	-	-	-	-	Phenylpropanoids and polyketides	Isoflavonoids	Coumestans	-	79.5	-	-	2.1528	2.1495	1.7286	0.001003	0.006141	4.5483	4.7527	4.6636	2.9933	2.2637	2.8218
neg_2778	Orientin 7,3'-dimethyl ether	metab_11778	yes	down	-	neg	89915-55-9	457.114	3.422	M-H2O-H	C23H24O11	-	77.1	HMDB0037450;LMPK12111047	-	-	-	-	-	Phenylpropanoids and polyketides	Flavonoids	Flavonoid glycosides	-	77.1	-	-	1.033	1.0327	0.9092	5.331e-05	0.0009326	4.4215	4.4466	4.4644	4.9251	4.8527	4.8858
neg_2821	6-(1-benzofuran-4-yloxy)-3,4,5-trihydroxyoxane-2-carboxylic acid	metab_11821	yes	up	-	neg	-	331.046	3.51303	M+Na-2H	C14H14O8	-	82	-	-	-	-	-	-	-	-	-	-	82	-	-	1.7761	1.7756	1.3876	0.0004333	0.003678	4.9418	4.5863	4.7142	3.5088	3.4656	3.2876
neg_2822	4-Methoxybenzyl O-(2-sulfoglucoside)	metab_11822	yes	up	-	neg	-	361.057	3.51303	M-H2O-H	C14H20O10S	-	61.6	HMDB0034754	-	-	-	-	-	Organic oxygen compounds	Organooxygen compounds	Carbohydrates and carbohydrate conjugates	-	61.6	-	-	2.3037	2.3023	2.3585	6.97e-06	0.0002414	3.9448	3.6971	3.8047	1.6336	1.6185	1.602
neg_2826	Eriodictyol-7-O-glucoside	metab_11826	yes	up	-	neg	38965-51-4	449.11	3.51303	M-H	C21H22O11	92.9	-	HMDB0029544	-	-	-	-	-	Benzenoids	Benzene and substituted derivatives	Benzoic acids and derivatives	92.9	-	-	-	1.8479	1.8452	1.5031	0.002228	0.01012	4.3806	4.4447	4.3045	3.3131	2.6289	2.7925
neg_2864	3-(6-hydroxy-7-methoxy-2H-1,3-benzodioxol-5-yl)prop-2-enoic acid	metab_11864	yes	up	-	neg	-	259.025	3.60422	M+Na-2H	C11H10O6	-	41.1	-	-	-	-	-	-	-	-	-	-	41.1	-	-	1.315	1.3133	1.1643	0.006102	0.01976	5.2938	5.4116	5.5181	4.8843	4.6076	4.4437
neg_2872	3-Dehydroquinate	metab_11872	yes	up	C00944	neg	10534-44-8	211.024	3.62702	M+Na-2H	C7H10O6	-	69.6	HMDB0012710	-	-	map01100;map00400;map01110;map01230	Metabolism;Metabolism;Metabolism;Metabolism	Global and overview maps;Amino acid metabolism;Global and overview maps;Global and overview maps	Organic acids and derivatives	Hydroxy acids and derivatives	Alpha hydroxy acids and derivatives	-	69.6	Metabolic pathways;Phenylalanine, tyrosine and tryptophan biosynthesis;Biosynthesis of secondary metabolites;Biosynthesis of amino acids	Metabolic pathways;Phenylalanine, tyrosine and tryptophan biosynthesis;Biosynthesis of secondary metabolites;Biosynthesis of amino acids	1.6182	1.6172	1.2957	5.234e-05	0.0009252	4.8504	4.712	4.7418	3.7495	3.6852	3.6044
neg_2900	METHYL 7-DESHYDROXYPYROGALLIN-4-CARBOXYLATE	metab_11900	yes	up	-	neg	-	261.04	3.69532	M-H	C13H10O6	53.2	-	-	-	-	-	-	-	-	-	-	53.2	-	-	-	1.9329	1.9316	1.7227	0.001316	0.00735	4.0616	3.6769	3.6305	2.4389	1.9414	2.2182
neg_2916	Apiosylglucosyl 4-hydroxybenzoate	metab_11916	yes	up	-	neg	223261-31-2	469.078	3.71818	M+K-2H	C18H24O12	-	56.8	HMDB0035318	-	-	-	-	-	Organic oxygen compounds	Organooxygen compounds	Carbohydrates and carbohydrate conjugates	-	56.8	-	-	2.8536	2.8504	3.2972	7.787e-05	0.001187	4.7609	4.9298	4.8882	1.87	1.2841	1.2681
neg_2954	9S-hydroxy-11,15-dioxo-5Z,13E-prostadienoic acid	metab_11954	yes	down	C04758	neg	-	395.207	3.83205	M+FA-H	C20H30O5	-	40.2	HMDB0062297;LMFA03010206	-	-	-	-	-	Lipids and lipid-like molecules	Fatty Acyls	Eicosanoids	-	40.2	-	-	1.1294	1.1309	0.8821	0.02781	0.05716	4.6017	4.8948	4.2666	5.2057	5.1929	5.2047
neg_2978	Epigallocatechin gallate	metab_11978	yes	up	C09731	neg	989-51-5	439.067	3.90032	M-H2O-H	C22H18O11	-	57.9	HMDB0003153	-	-	-	-	-	Phenylpropanoids and polyketides	Flavonoids	Flavans	-	57.9	-	-	2.0448	2.0423	1.6009	0.001168	0.00682	4.7367	4.8041	4.6471	3.3715	2.7841	2.7067
neg_3067	HIERACIN	metab_12067	yes	up	-	neg	-	301.035	4.17323	M-H	C15H10O7	62.5	-	-	-	-	-	-	-	-	-	-	62.5	-	-	-	1.6843	1.6819	1.2571	0.0006823	0.004774	5.6767	5.8898	5.9734	4.8255	4.5299	4.5971
neg_3125	2-(3,5-dihydroxyphenyl)-3,5,6,7-tetrahydroxy-4H-chromen-4-one	metab_12125	yes	up	-	neg	-	299.02	4.37797	M-H2O-H	C15H10O8	-	45.9	-	-	-	-	-	-	-	-	-	-	45.9	-	-	1.889	1.8867	1.4229	0.0002329	0.002395	4.9464	5.0165	5.0891	3.7388	3.3612	3.4788
neg_3130	Phenylalanyl-Valine	metab_12130	yes	down	-	neg	3918-90-9	527.286	4.40073	2M-H	C14H20N2O3	-	58.4	HMDB0029008	-	-	-	-	-	Organic acids and derivatives	Carboxylic acids and derivatives	Amino acids, peptides, and analogues	-	58.4	-	-	1.0944	1.0945	0.8779	0.003523	0.01357	3.7083	3.8868	3.6391	4.3405	4.258	4.1983
neg_3137	Theaflavic acid	metab_12137	yes	up	-	neg	30407-93-3	449.052	4.42352	M+Na-2H	C21H16O10	-	48.6	HMDB0040609	-	-	-	-	-	Phenylpropanoids and polyketides	Flavonoids	Flavans	-	48.6	-	-	2.7012	2.6978	2.6568	0.0008651	0.005605	4.8563	5.0204	4.9639	2.545	1.5284	1.512
neg_3172	(-)-11-Hydroxy-9,15,16-trioxooctadecanoic acid	metab_12172	yes	down	-	neg	38076-39-0	323.186	4.60572	M-H2O-H	C18H30O6	-	70.7	HMDB0038940	-	-	-	-	-	Lipids and lipid-like molecules	Fatty Acyls	Fatty acids and conjugates	-	70.7	-	-	1.0118	1.0114	0.8927	0.0017	0.008612	3.6599	3.6714	3.6027	4.0309	4.0254	4.1915
neg_3196	4-Hydroxy-5-(3'-hydroxyphenyl)-valeric acid-3'-O-sulphate	metab_12196	yes	up	-	neg	-	311.02	4.71948	M+Na-2H	C11H14O7S	-	45.2	HMDB0059975	-	-	-	-	-	Lipids and lipid-like molecules	Fatty Acyls	Fatty acids and conjugates	-	45.2	-	-	1.7626	1.7606	1.3647	0.0008678	0.005605	4.8908	4.9111	4.9495	3.894	3.4814	3.4342
neg_3202	Sulfasalazine	metab_12202	yes	up	C07316	neg	599-79-1	419.041	4.74223	M+Na-2H	C18H14N4O5S	-	71.8	HMDB0014933	-	-	-	-	-	Organoheterocyclic compounds	Azobenzenes	Not Available	-	71.8	-	-	2.4667	2.4633	2.2143	0.005998	0.01957	4.7741	4.9486	4.9393	3.2068	1.7436	1.6695
neg_3207	Tryptophanol	metab_12207	yes	down	C00955	neg	526-55-6	206.082	4.76507	M+FA-H	C10H11NO	-	56.2	HMDB0003447;HMDB0244977	-	-	map00380	Metabolism	Amino acid metabolism	Organoheterocyclic compounds	Indoles and derivatives	Indoles	-	56.2	Tryptophan metabolism	Tryptophan metabolism	1.7155	1.7182	0.5641	0.017	0.0413	1.2374	2.3503	1.7168	3.084	3.3771	2.9411
neg_3213	Lamivudine	metab_12213	yes	up	C07065	neg	134678-17-4	503.099	4.7878	2M+FA-H	C8H11N3O3S	-	51.5	HMDB0251826;HMDB0014847;PW_C009184	-	-	-	-	-	Nucleosides, nucleotides, and analogues	Nucleoside and nucleotide analogues	3''-thia pyrimidine nucleosides	-	51.5	-	-	2.6154	2.6127	2.3833	7.651e-05	0.001172	4.8547	4.9193	4.9258	2.3946	1.8948	1.8781
neg_3245	Tetranor 12-HETE	metab_12245	yes	down	-	neg	-	287.165	4.94718	M+Na-2H	C16H26O3	-	57.3	HMDB0060055	-	-	-	-	-	Lipids and lipid-like molecules	Fatty Acyls	Fatty acids and conjugates	-	57.3	-	-	1.0329	1.0341	0.8327	0.01609	0.0399	2.3921	2.6917	2.2909	2.9855	2.8981	2.9733
neg_3266	Avenanthramide 1p	metab_12266	yes	down	-	neg	115610-36-1	282.077	5.06018	M-H	C16H13NO4	-	48.1	HMDB0029282	-	-	-	-	-	Phenylpropanoids and polyketides	Cinnamic acids and derivatives	Hydroxycinnamic acids and derivatives	-	48.1	-	-	1.6882	1.6877	0.6906	0.01001	0.02806	3.1794	3.0301	2.3956	4.4195	3.9357	4.1034
neg_3286	9,10,13-Trihydroxystearic acid	metab_12286	yes	down	-	neg	50439-74-2	331.249	5.15127	M-H	C18H36O5	-	49	HMDB0030935	-	-	-	-	-	Lipids and lipid-like molecules	Fatty Acyls	Fatty acids and conjugates	-	49	-	-	1.3282	1.3271	0.8444	6.375e-05	0.001039	3.994	3.9202	4.0238	4.7657	4.7044	4.6673
neg_3432	(2Z,8S,9Z)-2,9-Heptadecadiene-8-hydroxy-4,6-diyne-1-yl acetate	metab_12432	yes	down	-	neg	144790-29-4	347.187	6.12822	M+FA-H	C19H26O3	-	82.3	HMDB0031038	-	-	-	-	-	Lipids and lipid-like molecules	Fatty Acyls	Fatty alcohol esters	-	82.3	-	-	1.077	1.0779	0.869	0.01787	0.04278	3.5673	3.8186	3.3787	4.2408	4.0604	4.0847
neg_3705	Cis-9,10-Epoxystearic acid	metab_12704	yes	down	C19418	neg	2443-39-2	297.243	7.51592	M-H	C18H34O3	34.4	-	HMDB0247617	-	-	map00073	Metabolism	Lipid metabolism	Lipids and lipid-like molecules	Fatty Acyls	Lineolic acids and derivatives	34.4	-	Cutin, suberine and wax biosynthesis	Cutin, suberine and wax biosynthesis	1.0257	1.0247	0.9223	0.001323	0.00736	5.3207	5.2431	5.3855	5.8155	5.7861	5.6901
neg_3988	(3beta,5alpha,9alpha,14alpha,22E,24R)-3,5,9,14-Tetrahydroxyergosta-7,22-dien-6-one	metab_12987	yes	down	-	neg	211486-14-5	441.301	8.73403	M-H2O-H	C28H44O5	-	39.9	HMDB0032690	-	-	-	-	-	Lipids and lipid-like molecules	Steroids and steroid derivatives	Ergostane steroids	-	39.9	-	-	1.9797	1.9781	0.633	3.02e-06	0.0001437	2.7606	2.7642	2.8625	4.3713	4.4126	4.4662
neg_5188	Cerebronic acid	metab_14187	yes	down	C17873	neg	544-57-0	383.353	9.98937	M-H	C24H48O3	-	68.2	HMDB0039540	-	-	-	-	-	Lipids and lipid-like molecules	Fatty Acyls	Fatty acids and conjugates	-	68.2	-	-	1.0912	1.0898	0.8927	0.02231	0.05031	4.6833	4.6649	4.6479	5.2508	5.4796	4.9467
neg_5324	Annomuricin-D-one	metab_14323	yes	up	-	neg	-	633.438	9.31478	M+Na-2H	C35H64O8	-	70.4	HMDB0030890	-	-	-	-	-	Lipids and lipid-like molecules	Fatty Acyls	Fatty alcohols	-	70.4	-	-	1.7162	1.7147	1.3015	1.977e-05	0.0004827	5.187	5.2671	5.3579	4.0162	4.0659	4.0678
neg_5621	2-Pentadecylfuran	metab_14620	yes	down	-	neg	59958-20-2	323.259	8.41408	M+FA-H	C19H34O	-	66.8	HMDB0033609	-	-	-	-	-	Organoheterocyclic compounds	Heteroaromatic compounds	Not Available	-	66.8	-	-	1.2215	1.2207	0.8562	2.741e-05	0.0005982	3.7024	3.7076	3.6466	4.3457	4.2919	4.276
neg_5765	MG(0:0/a-17:0/0:0)[rac]	metab_14764	yes	up	-	neg	-	365.27	7.89978	M+Na-2H	C20H40O4	-	64.5	HMDB0072848	-	-	-	-	-	Lipids and lipid-like molecules	Glycerolipids	Monoradylglycerols	-	64.5	-	-	1.1381	1.1364	1.2608	0.04981	0.08677	3.1877	3.2237	3.1318	2.9836	2.3761	2.2103
neg_5769	11(R)-HEDE	metab_14768	yes	up	-	neg	-	323.259	7.88552	M-H	C20H36O3	70.3	-	-	-	-	-	-	-	-	-	-	70.3	-	-	-	1.6458	1.6445	1.4667	2.451e-05	0.000564	3.5901	3.4902	3.5077	2.4865	2.3653	2.3663
neg_5961	3-?Methyl-?5-?propyl-2-?furantridecanoic acid	metab_14960	yes	down	-	neg	-	381.265	7.29117	M+FA-H	C21H36O3	-	58.7	HMDB0112079	-	-	-	-	-	Lipids and lipid-like molecules	Fatty Acyls	Fatty acids and conjugates	-	58.7	-	-	1.0106	1.009	0.887	0.0004273	0.00364	3.4292	3.3321	3.3467	3.7656	3.8493	3.7783
neg_6373	N-Benzoylanthranilic acid	metab_15372	yes	down	C03141	neg	579-93-1	240.066	5.46765	M-H	C14H11NO3	-	59.4	HMDB0032175	-	-	-	-	-	Benzenoids	Benzene and substituted derivatives	Benzoic acids and derivatives	-	59.4	-	-	1.451	1.4534	0.7657	0.01981	0.04613	3.0962	3.6455	2.9282	4.2315	4.4537	3.9424
neg_6376	KOPARIN 2'-METHYL ETHER	metab_15375	yes	up	-	neg	-	313.072	5.44493	M-H	C17H14O6	66.7	-	-	-	-	-	-	-	-	-	-	66.7	-	-	-	1.7781	1.7775	1.4438	0.007021	0.02159	4.602	5.0033	4.0688	3.1994	3.2133	3.057
neg_6385	(+/-)alpha-CMBHC	metab_15384	yes	down	-	neg	-	319.192	5.39945	M-H	C19H28O4	39.8	-	-	-	-	-	-	-	-	-	-	39.8	-	-	-	1.7246	1.7237	0.7214	0.0001869	0.002083	3.2389	3.3279	3.0895	4.4162	4.3831	4.5859
neg_6412	Eupatorin	metab_15411	yes	up	-	neg	-	343.082	5.2423	M-H	C18H16O7	75.6	-	HMDB0252128;LMPK12111239	-	-	-	-	-	Phenylpropanoids and polyketides	Flavonoids	O-methylated flavonoids	75.6	-	-	-	1.6714	1.6719	1.5381	0.02355	0.0525	3.7747	4.3855	3.1679	2.5975	2.5475	2.2196
neg_6444	Trans-3,3',4',5,5',7-Hexahydroxyflavanone	metab_15443	yes	up	-	neg	27200-12-0	319.046	5.1057	M-H	C15H12O8	-	83	HMDB0030835	-	-	-	-	-	Phenylpropanoids and polyketides	Flavonoids	Flavans	-	83	-	-	2.2617	2.26	8.079	0.000146	0.001775	2.4585	2.2582	2.5891	0.1875	0.1822	0.5344
neg_6506	Gomphidic acid	metab_15505	yes	up	-	neg	25328-77-2	393.025	4.83337	M+Na-2H	C18H12O9	-	58.1	HMDB0033542	-	-	-	-	-	Benzenoids	Phenols	Benzenetriols and derivatives	-	58.1	-	-	1.7634	1.7618	1.33	0.006224	0.01998	5.5224	5.4667	5.611	4.6169	4.1365	3.7264
neg_6507	Estriol	metab_15506	yes	down	C05141	neg	50-27-1;547-81-9	333.171	4.83337	M+FA-H	C18H24O3	-	75.1	HMDB0000153;HMDB0000347;PW_C000100	Steroids;Hormones and transmitters	18-Carbon atoms;Steroid hormones	map01100	Metabolism	Global and overview maps	Lipids and lipid-like molecules	Steroids and steroid derivatives	Estrane steroids	-	75.1	Metabolic pathways	Metabolic pathways	1.1256	1.1261	0.883	0.01547	0.03868	4.4457	4.6306	4.1653	5.0618	4.8987	5.0357
neg_6573	2-(3,4-dihydroxyphenyl)-5,7-dihydroxy-3,6-dimethoxy-4H-chromen-4-one	metab_15572	yes	up	-	neg	-	367.046	4.58297	M+Na-2H	C17H14O8	-	65.5	-	-	-	-	-	-	-	-	-	-	65.5	-	-	2.311	2.3078	1.9318	0.0003983	0.003464	4.5377	4.7806	4.6132	2.761	2.103	2.3485
neg_6576	Diosmetin	metab_15575	yes	up	C10038	neg	520-34-3	299.056	4.58297	M-H	C16H12O6	63.8	-	LMPK12110824;HMDB0029676	-	-	-	-	-	Phenylpropanoids and polyketides	Flavonoids	O-methylated flavonoids	63.8	-	-	-	1.1788	1.1771	1.1572	0.02867	0.05716	5.0933	5.0378	4.6235	4.5176	4.1152	4.1187
neg_6634	2-Keto-3-deoxy-6-phosphogluconic acid	metab_15632	yes	up	C04442	neg	27244-54-8	303.015	4.37797	M+FA-H	C6H11O9P	-	61.7	HMDB0001376	-	-	map01100;map00030;map01200	Metabolism;Metabolism;Metabolism	Global and overview maps;Carbohydrate metabolism;Global and overview maps	Organic acids and derivatives	Keto acids and derivatives	Medium-chain keto acids and derivatives	-	61.7	Metabolic pathways;Pentose phosphate pathway;Carbon metabolism	Metabolic pathways;Pentose phosphate pathway;Carbon metabolism	1.9241	1.9231	1.4361	0.005805	0.01918	5.5217	5.1716	5.43	4.2518	3.7096	3.2652
neg_6694	4-(3-hydroxybutyl)-2-methoxyphenol	metab_15692	yes	up	-	neg	-	241.108	4.19597	M+FA-H	C11H16O3	-	47.2	-	-	-	-	-	-	-	-	-	-	47.2	-	-	1.0098	1.009	1.1239	0.02224	0.05023	4.4574	4.3573	4.2515	4.0522	3.651	3.9233
neg_6736	L-Menthyl (R,S)-3-hydroxybutyrate	metab_15734	yes	down	-	neg	108766-16-1	287.186	4.08228	M+FA-H	C14H26O3	-	42	HMDB0032370	-	-	-	-	-	Lipids and lipid-like molecules	Prenol lipids	Monoterpenoids	-	42	-	-	1.0165	1.0163	0.8661	0.0005553	0.004259	2.824	2.8324	2.8017	3.2507	3.1835	3.3304
neg_6784	Eriodictyol	metab_15782	yes	up	C05631	neg	552-58-9	287.056	3.96858	M-H	C15H12O6	82.5	-	HMDB0005810;LMPK12140002	-	-	map01100;map00941;map01110	Metabolism;Metabolism;Metabolism	Global and overview maps;Biosynthesis of other secondary metabolites;Global and overview maps	Phenylpropanoids and polyketides	Flavonoids	Flavans	82.5	-	Metabolic pathways;Flavonoid biosynthesis;Biosynthesis of secondary metabolites	Metabolic pathways;Flavonoid biosynthesis;Biosynthesis of secondary metabolites	1.2309	1.2293	1.1604	0.006484	0.02054	4.9668	4.903	4.6728	4.3538	4.0401	4.14
neg_6815	1-O-Feruloylglucose	metab_15813	yes	up	-	neg	7196-71-6	377.088	3.90032	M+Na-2H	C16H20O9	-	66.2	HMDB0036938	-	-	-	-	-	Phenylpropanoids and polyketides	Cinnamic acids and derivatives	Hydroxycinnamic acids and derivatives	-	66.2	-	-	1.384	1.3851	1.2924	0.02861	0.05716	4.4249	3.8333	4.0052	3.3727	3.3799	2.7376
neg_6878	4''-O-Acetylafzelin	metab_15876	yes	up	-	neg	135618-17-6	519.114	3.74102	M+FA-H	C23H22O11	-	45.9	HMDB0039746	-	-	-	-	-	Phenylpropanoids and polyketides	Flavonoids	Flavonoid glycosides	-	45.9	-	-	1.3638	1.363	1.2167	5.016e-05	0.0008959	4.3506	4.2845	4.3836	3.5887	3.6036	3.5073
neg_6890	Azlocillin	metab_15888	yes	up	C06839	neg	37091-66-0	496.11	3.71818	M+Cl	C20H23N5O6S	-	40.1	HMDB0015194	-	-	-	-	-	Organic acids and derivatives	Carboxylic acids and derivatives	Amino acids, peptides, and analogues	-	40.1	-	-	1.5186	1.5165	1.2596	0.003375	0.0132	4.7716	4.8672	4.9007	4.1584	3.6793	3.7054
neg_6893	Naringenin-7-O-glucoside	metab_15891	yes	up	-	neg	-	433.114	3.71818	M-H	C21H22O10	94.4	-	-	-	-	-	-	-	-	-	-	94.4	-	-	-	1.4644	1.4626	1.2309	0.001344	0.007434	4.8174	4.8453	4.9197	4.1686	3.8235	3.8537
neg_6895	Oryzalide B	metab_15893	yes	down	-	neg	134885-94-2	365.197	3.71818	M+FA-H	C19H28O4	-	40.3	HMDB0037592	-	-	-	-	-	Lipids and lipid-like molecules	Prenol lipids	Terpene lactones	-	40.3	-	-	1.088	1.0883	0.8938	0.009939	0.02796	4.5171	4.6736	4.2941	4.9808	5.0069	5.0978
neg_6919	8-hydroxy-6,7-dimethoxy-2H-chromen-2-one	metab_15917	yes	up	-	neg	-	243.03	3.67257	M+Na-2H	C11H10O5	-	36.4	-	-	-	-	-	-	-	-	-	-	36.4	-	-	2.4294	2.4265	2.36	0.002271	0.01021	4.2965	4.526	4.3738	2.5228	1.7823	1.2861
neg_6957	Rosuvastatin 5 S-lactone	metab_15955	yes	up	-	neg	-	498.126	3.58143	M+Cl	C22H26FN3O5S	-	36	HMDB0060941	-	-	-	-	-	Organoheterocyclic compounds	Diazines	Pyrimidines and pyrimidine derivatives	-	36	-	-	2.2611	2.2582	2.0226	0.001355	0.007466	4.1608	4.3798	4.365	2.6509	1.9242	1.8054
neg_6971	S-Nitrosoglutathione	metab_15969	yes	up	-	neg	57564-91-7	371.041	3.55868	M+Cl	C10H16N4O7S	-	76.7	HMDB0004645;HMDB0257412	-	-	-	-	-	Organic acids and derivatives	Carboxylic acids and derivatives	Amino acids, peptides, and analogues	-	76.7	-	-	2.5199	2.5178	2.458	1.003e-07	2.09e-05	4.3698	4.4672	4.4297	1.815	1.7997	1.7831
neg_6999	Vanillic acid-4-O-glucuronide	metab_15997	yes	up	-	neg	18191-12-3	363.072	3.51303	M+Na-2H	C15H18O9	-	84.7	HMDB0060024	-	-	-	-	-	Organic oxygen compounds	Organooxygen compounds	Carbohydrates and carbohydrate conjugates	-	84.7	-	-	1.7607	1.7611	1.4428	0.004424	0.01584	4.7143	4.1948	4.3649	3.2033	3.2836	2.7148
neg_7002	2-O-(6-Phospho-alpha-mannosyl)-D-glycerate	metab_16000	yes	up	C16699	neg	-	329.03	3.51303	M-H2O-H	C9H17O12P	-	73.6	HMDB0012152	-	-	-	-	-	Organic oxygen compounds	Organooxygen compounds	Carbohydrates and carbohydrate conjugates	-	73.6	-	-	2.3744	2.372	1.9717	0.0003768	0.003334	4.7947	4.8087	4.7934	2.8465	2.3216	2.1337
neg_7026	Quercitrin	metab_16024	yes	up	C01750	neg	522-12-3	469.078	3.46753	M+Na-2H	C21H20O11	-	62.9	HMDB0033751;HMDB0257017;LMPK12112171	-	-	map00944	Metabolism	Biosynthesis of other secondary metabolites	Phenylpropanoids and polyketides	Flavonoids	Flavonoid glycosides	-	62.9	Flavone and flavonol biosynthesis	Flavone and flavonol biosynthesis	2.7265	2.7239	2.94	1.627e-06	9.402e-05	4.5638	4.7043	4.7016	1.6889	1.5398	1.5234
neg_7096	Hesperetin	metab_16094	yes	up	C01709	neg	520-33-2	347.077	3.35355	M+FA-H	C16H14O6	-	74.2	HMDB0005782;LMPK12140003	-	-	map00941	Metabolism	Biosynthesis of other secondary metabolites	Phenylpropanoids and polyketides	Flavonoids	O-methylated flavonoids	-	74.2	Flavonoid biosynthesis	Flavonoid biosynthesis	1.6163	1.6149	1.3038	8.006e-05	0.001191	4.7016	4.6403	4.6425	3.51	3.5133	3.7005
neg_7122	Glucorhein	metab_16120	yes	up	-	neg	34298-86-7	467.062	3.30795	M+Na-2H	C21H18O11	-	53.8	HMDB0032877	-	-	-	-	-	Benzenoids	Anthracenes	Anthracenecarboxylic acids and derivatives	-	53.8	-	-	2.7873	2.7843	2.7052	0.0003606	0.003255	5.1378	5.1211	5.2421	2.4857	1.6298	1.6133
neg_7156	Gibberellin A86	metab_16154	yes	up	-	neg	138703-93-2	401.124	3.26223	M+Na-2H	C19H24O8	-	76.2	HMDB0038450	-	-	-	-	-	Lipids and lipid-like molecules	Prenol lipids	Diterpenoids	-	76.2	-	-	1.0872	1.0865	1.1536	0.01338	0.03471	4.2393	4.0241	3.9034	3.5202	3.3722	3.6545
neg_7175	Gly Leu Phe	metab_16173	yes	down	-	neg	-	334.177	3.23945	M-H	C17H25N3O4	74	-	-	-	-	-	-	-	-	-	-	74	-	-	-	1.2952	1.2977	0.7376	0.04317	0.07748	2.3729	2.8558	1.8723	3.1407	3.1825	3.3025
neg_7176	2,4',5,7-Tetrahydroxyflavanone	metab_16174	yes	up	-	neg	58124-18-8	333.062	3.23945	M+FA-H	C15H12O6	-	87.9	HMDB0040314	-	-	-	-	-	Phenylpropanoids and polyketides	Flavonoids	Hydroxyflavonoids	-	87.9	-	-	2.2289	2.2268	1.5758	4.018e-05	0.0007727	5.5814	5.6037	5.7448	3.7656	3.4878	3.491
neg_7189	Pyridine N-oxide glucuronide	metab_16187	yes	up	-	neg	-	307.046	3.21655	M+Cl	C11H14NO7+	-	68.9	HMDB0061177	-	-	-	-	-	Organic oxygen compounds	Organooxygen compounds	Carbohydrates and carbohydrate conjugates	-	68.9	-	-	2.4319	2.4299	3.4975	6.691e-07	5.472e-05	3.4501	3.4812	3.3367	0.993	0.9791	0.964
neg_7205	6-Formylumbelliferone	metab_16203	yes	up	-	neg	-	235.024	3.1937	M+FA-H	C10H6O4	-	65.3	HMDB0039147	-	-	-	-	-	Phenylpropanoids and polyketides	Coumarins and derivatives	Hydroxycoumarins	-	65.3	-	-	1.9937	1.9915	1.6718	4.345e-05	0.0008125	4.0729	4.2022	4.0417	2.5971	2.3817	2.3896
neg_7233	11,13-Dihydrotaraxinic acid glucosyl ester	metab_16231	yes	up	-	neg	75911-16-9	471.187	3.1481	M+FA-H	C21H30O9	-	80.4	HMDB0035867	-	-	-	-	-	Lipids and lipid-like molecules	Saccharolipids	Not Available	-	80.4	-	-	2.4509	2.4496	2.3968	0.0001134	0.001497	4.3704	4.2962	4.2191	1.9272	1.9755	1.4718
neg_7288	Daphnetin	metab_16286	yes	up	C03093	neg	486-35-1	177.018	3.05855	M-H	C9H6O4	82.7	-	-	-	-	-	-	-	-	-	-	82.7	-	-	-	1.2972	1.2967	1.1948	3.793e-05	0.0007461	4.3317	4.2698	4.2632	3.5805	3.6409	3.5464
neg_7310	Maleylacetoacetic acid	metab_16308	yes	up	C01036	neg	5698-52-2	221.009	3.0139	M+Na-2H	C8H8O6	-	47	HMDB0002052;PW_C001376;LMFA01170114	-	-	map01100;map00350	Metabolism;Metabolism	Global and overview maps;Amino acid metabolism	Organic acids and derivatives	Keto acids and derivatives	Medium-chain keto acids and derivatives	-	47	Metabolic pathways;Tyrosine metabolism	Metabolic pathways;Tyrosine metabolism	2.4245	2.422	1.9048	6.302e-05	0.001033	5.1398	5.1982	5.0901	2.9719	2.5827	2.5458
neg_7314	3,7-Dimethylquercetin	metab_16312	yes	up	C01265	neg	2068-02-02	375.072	2.9984	M+FA-H	C17H14O7	-	68.3	HMDB0029263	-	-	map00944	Metabolism	Biosynthesis of other secondary metabolites	Phenylpropanoids and polyketides	Flavonoids	O-methylated flavonoids	-	68.3	Flavone and flavonol biosynthesis	Flavone and flavonol biosynthesis	2.3834	2.3813	2.1659	3.465e-07	3.856e-05	4.3161	4.4297	4.3347	2.0292	2.0139	1.9972
neg_7317	5-Methoxysalicylic acid	metab_16315	yes	up	-	neg	2612-02-04	167.034	2.9984	M-H	C8H8O4	70.9	-	HMDB0001868	-	-	-	-	-	Benzenoids	Benzene and substituted derivatives	Benzoic acids and derivatives	70.9	-	-	-	1.4195	1.4189	1.1655	9.358e-05	0.001312	5.9962	5.8935	5.832	5.0731	5.1046	5.0257
neg_7330	(E)-8-Hydroxy-2-octene-4,6-diynoic acid	metab_16328	yes	up	-	neg	65367-65-9	195.029	2.97622	M+FA-H	C8H6O3	-	54.3	HMDB0031515	-	-	-	-	-	Lipids and lipid-like molecules	Fatty Acyls	Fatty acids and conjugates	-	54.3	-	-	1.6254	1.6245	1.2254	3.305e-05	0.0006799	6.0402	5.8907	5.9583	4.9087	4.8847	4.8053
neg_7375	Methyl 7-epi-12-hydroxyjasmonate glucoside	metab_16373	yes	down	-	neg	142465-56-3	401.182	2.90813	M-H	C19H30O9	-	51.5	HMDB0031763	-	-	-	-	-	Lipids and lipid-like molecules	Fatty Acyls	Fatty acyl glycosides	-	51.5	-	-	1.2065	1.2058	0.8698	0.001356	0.007466	4.21	4.0368	4.1541	4.8685	4.7167	4.6745
neg_7418	4-Hydroxy-6-methyl-3-(1-oxobutyl)-2H-pyran-2-one	metab_16416	yes	up	-	neg	22073-85-4	241.071	2.86252	M+FA-H	C10H12O4	-	57.9	HMDB0040637	-	-	-	-	-	Organic oxygen compounds	Organooxygen compounds	Carbonyl compounds	-	57.9	-	-	1.281	1.281	1.3007	0.0005637	0.004309	3.0834	2.9171	2.9794	2.2055	2.371	2.3268
neg_7444	Shoyuflavone A	metab_16442	yes	up	-	neg	190712-87-9	407.041	2.81658	M+Na-2H	C19H14O9	-	40.1	HMDB0034582	-	-	-	-	-	Phenylpropanoids and polyketides	Isoflavonoids	Isoflav-2-enes	-	40.1	-	-	3.1364	3.1339	24.1757	1.821e-10	6.18e-07	4.2528	4.2398	4.2217	0.1806	0.1754	0.1699
neg_7525	Cordeauxione	metab_16523	yes	up	-	neg	1228-77-9	273.041	2.72493	M-H2O-H	C14H12O7	-	61.3	HMDB0034310	-	-	-	-	-	Organic acids and derivatives	Vinylogous acids	Not Available	-	61.3	-	-	2.0276	2.0252	1.5796	0.00068	0.004768	4.6776	4.7533	4.739	3.3474	2.8543	2.7673
neg_7533	Norrubrofusarin 6-beta-gentiobioside	metab_16531	yes	down	-	neg	-	563.141	2.70208	M-H2O-H	C26H30O15	-	77.8	HMDB0034570	-	-	-	-	-	Organoheterocyclic compounds	Naphthopyrans	Naphthopyranones	-	77.8	-	-	1.0798	1.0787	0.9152	6.082e-05	0.001014	5.241	5.2344	5.2238	5.6636	5.7476	5.7413
neg_7552	Quercetin 3-[rhamnosyl-(1->2)-alpha-L-arabinopyranoside]	metab_16550	yes	up	-	neg	86749-52-2	601.121	2.6791	M+Na-2H	C26H28O15	-	54	HMDB0037928	-	-	-	-	-	Phenylpropanoids and polyketides	Flavonoids	Flavonoid glycosides	-	54	-	-	2.0176	2.0158	1.5106	9.892e-06	0.0003037	4.9498	4.9639	5.041	3.2621	3.2317	3.4051
neg_7557	Benzyl O-[arabinofuranosyl-(1->6)-glucoside]	metab_16555	yes	up	-	neg	88510-11-6	383.135	2.6791	M-H2O-H	C18H26O10	-	43.3	HMDB0041514	-	-	-	-	-	Organic oxygen compounds	Organooxygen compounds	Carbohydrates and carbohydrate conjugates	-	43.3	-	-	2.6993	2.698	3.711	1.606e-05	0.0004225	4.1096	4.209	4.0848	1.0127	1.3466	0.9836
neg_7601	Butyl salicylate	metab_16599	yes	up	-	neg	2052-14-4	239.092	2.63327	M+FA-H	C11H14O3	-	51.8	HMDB0040730	-	-	-	-	-	Benzenoids	Benzene and substituted derivatives	Benzoic acids and derivatives	-	51.8	-	-	1.3739	1.3736	1.2578	0.001527	0.007991	4.1419	3.838	3.8191	3.1335	3.1245	3.1217
neg_7647	Myricetin	metab_16645	yes	up	C10107	neg	529-44-2	317.03	2.56447	M-H	C15H10O8	41.5	-	HMDB0002755;LMPK12110001	-	-	map00941;map01110;map00944	Metabolism;Metabolism;Metabolism	Biosynthesis of other secondary metabolites;Global and overview maps;Biosynthesis of other secondary metabolites	Phenylpropanoids and polyketides	Flavonoids	Flavones	41.5	-	Flavonoid biosynthesis;Biosynthesis of secondary metabolites;Flavone and flavonol biosynthesis	Flavonoid biosynthesis;Biosynthesis of secondary metabolites;Flavone and flavonol biosynthesis	2.044	2.0423	1.4765	2.072e-05	0.0004971	5.3939	5.2927	5.4135	3.7644	3.5748	3.5651
neg_7689	Phenylglucuronide	metab_16687	yes	up	-	neg	-	291.051	2.51885	M+Na-2H	C12H14O7	-	59.4	HMDB0059806	-	-	-	-	-	Organic oxygen compounds	Organooxygen compounds	Carbohydrates and carbohydrate conjugates	-	59.4	-	-	2.3435	2.3405	2.1588	0.000624	0.004564	4.2269	4.3303	4.3683	2.1363	1.5391	2.3116
neg_7703	3-Glucosyl-2,3',4,4',6-pentahydroxybenzophenone	metab_16701	yes	up	-	neg	92631-83-9	423.094	2.496	M-H	C19H20O11	-	37	HMDB0032645	-	-	-	-	-	Organic oxygen compounds	Organooxygen compounds	Carbohydrates and carbohydrate conjugates	-	37	-	-	2.3266	2.3243	1.9556	7.485e-06	0.000252	4.5198	4.5972	4.636	2.4774	2.2667	2.2893
neg_7705	3,4,5-trihydroxy-6-(1-oxo-1H-isochromene-3-carbonyloxy)oxane-2-carboxylic acid	metab_16703	yes	up	-	neg	-	347.041	2.496	M-H2O-H	C16H14O10	-	80.8	-	-	-	-	-	-	-	-	-	-	80.8	-	-	1.7434	1.743	1.5689	0.0003452	0.003184	3.7195	3.3315	3.5057	2.2586	2.2433	2.2264
neg_7759	Raffinose	metab_16757	yes	up	C00492	neg	512-69-6	541.12	2.42725	M+K-2H	C18H32O16	-	44	PW_C001805;HMDB0003213	-	-	map01100;map02010;map00052	Metabolism;Environmental Information Processing;Metabolism	Global and overview maps;Membrane transport;Carbohydrate metabolism	Organic oxygen compounds	Organooxygen compounds	Carbohydrates and carbohydrate conjugates	-	44	Metabolic pathways;ABC transporters;Galactose metabolism	Metabolic pathways;ABC transporters;Galactose metabolism	1.6949	1.6948	1.6409	0.0008662	0.005605	3.3527	2.882	3.1142	1.9146	1.8994	1.8827
neg_7775	Taxifolin 3-arabinoside	metab_16773	yes	up	-	neg	-	435.094	2.40465	M-H	C20H20O11	-	47.9	HMDB0041418	-	-	-	-	-	Phenylpropanoids and polyketides	Diarylheptanoids	Cyclic diarylheptanoids	-	47.9	-	-	1.819	1.8178	1.4435	1.279e-05	0.0003544	4.4301	4.4555	4.4999	3.1	3.17	3.0031
neg_7813	Wyeronic acid	metab_16811	yes	up	-	neg	117783-52-5	275.056	2.3586	M+FA-H	C13H10O4	-	45.9	HMDB0039141	-	-	-	-	-	Lipids and lipid-like molecules	Fatty Acyls	Fatty acids and conjugates	-	45.9	-	-	1.9178	1.9164	1.5357	6.368e-06	0.0002358	4.4046	4.346	4.346	2.9215	2.8421	2.766
neg_7838	Quercetin 3-O-glucoside	metab_16836	yes	up	C05623	neg	482-35-9;21637-25-2	463.089	2.31362	M-H	C21H20O12	33	-	HMDB0037362	-	-	map01100;map01110;map00944	Metabolism;Metabolism;Metabolism	Global and overview maps;Global and overview maps;Biosynthesis of other secondary metabolites	Phenylpropanoids and polyketides	Flavonoids	Flavonoid glycosides	33	-	Metabolic pathways;Biosynthesis of secondary metabolites;Flavone and flavonol biosynthesis	Metabolic pathways;Biosynthesis of secondary metabolites;Flavone and flavonol biosynthesis	2.3885	2.3863	1.8474	2.908e-05	0.0006286	5.1777	5.0851	5.2103	2.9986	2.6581	2.7181
neg_7871	Cystathionine ketimine	metab_16869	yes	up	-	neg	87254-95-3	224.002	2.2909	M+Na-2H	C7H9NO4S	-	36.4	HMDB0002015	-	-	-	-	-	Organic acids and derivatives	Carboxylic acids and derivatives	Amino acids, peptides, and analogues	-	36.4	-	-	1.4746	1.4731	1.655	4.321e-05	0.0008102	2.1877	2.3329	2.3178	1.3923	1.3775	1.3613
neg_7908	4-(4-Hydroxyphenyl)-2-butanone glucoside	metab_16906	yes	up	-	neg	38963-94-9	371.135	2.2237	M+FA-H	C16H22O7	-	54.4	HMDB0034863	-	-	-	-	-	Organic oxygen compounds	Organooxygen compounds	Carbohydrates and carbohydrate conjugates	-	54.4	-	-	1.5774	1.5751	1.4397	0.009241	0.02645	3.7102	3.7383	3.5034	2.3639	2.2615	2.9815
neg_7926	P-Salicylic acid	metab_16924	yes	down	C00156	neg	99-96-7	137.023	2.20167	M-H	C7H6O3	78.3	-	HMDB0000500	-	-	map01100;map00130;map01110;map00790;map01240	Metabolism;Metabolism;Metabolism;Metabolism;Metabolism	Global and overview maps;Metabolism of cofactors and vitamins;Global and overview maps;Metabolism of cofactors and vitamins;Global and overview maps	Benzenoids	Benzene and substituted derivatives	Benzoic acids and derivatives	78.3	-	Metabolic pathways;Ubiquinone and other terpenoid-quinone biosynthesis;Biosynthesis of secondary metabolites;Folate biosynthesis;Biosynthesis of cofactors	Metabolic pathways;Ubiquinone and other terpenoid-quinone biosynthesis;Biosynthesis of secondary metabolites;Folate biosynthesis;Biosynthesis of cofactors	1.4237	1.4222	0.855	1.555e-05	0.000414	4.9276	4.938	4.9808	5.7431	5.844	5.7778
neg_7942	Procyanidin B2	metab_16940	yes	down	C17639	neg	29106-49-8	577.135	2.1562	M-H	C30H26O12	94.7	-	LMPK12030002;HMDB0033973	-	-	-	-	-	Phenylpropanoids and polyketides	Flavonoids	Biflavonoids and polyflavonoids	94.7	-	-	-	1.6218	1.621	0.8112	7.607e-05	0.001168	4.7349	4.6937	4.6731	5.9201	5.7176	5.7474
neg_7976	(S)C(S)S-S-Methylcysteine sulfoxide	metab_16973	yes	down	-	neg	32726-14-0	452.081	2.11192	3M-H	C4H9NO3S	-	34.2	HMDB0029432	-	-	-	-	-	Organic acids and derivatives	Carboxylic acids and derivatives	Amino acids, peptides, and analogues	-	34.2	-	-	2.122	2.1205	0.3789	0.0113	0.03059	0.6991	0.8883	2.1457	3.1871	3.4098	3.2526
neg_7996	AESCULIN	metab_16993	yes	up	C09264	neg	531-75-9	339.072	2.0893	M-H	C15H16O9	36.9	-	HMDB0030820	-	-	-	-	-	Phenylpropanoids and polyketides	Coumarins and derivatives	Coumarin glycosides	36.9	-	-	-	2.4711	2.4683	2.3093	0.0001318	0.00166	4.4683	4.4706	4.522	2.2184	1.6192	1.9914
neg_8046	Furaneol 4-(6-malonylglucoside)	metab_17042	yes	up	-	neg	-	357.083	2.023	M-H2O-H	C15H20O11	-	72.7	HMDB0029778	-	-	-	-	-	Organic oxygen compounds	Organooxygen compounds	Carbohydrates and carbohydrate conjugates	-	72.7	-	-	1.6308	1.6299	1.3812	0.001163	0.006802	4.237	4.0488	3.9971	3.156	2.9788	2.7566
neg_8058	Vanillin	metab_17054	yes	down	C00755	neg	121-33-5	151.039	2.023	M-H	C8H8O3	41.1	-	HMDB0245834;HMDB0012308;MJDBOTE0000374	-	-	map01100;map01110;map00998	Metabolism;Metabolism;Metabolism	Global and overview maps;Global and overview maps;Biosynthesis of other secondary metabolites	Benzenoids	Phenols	Methoxyphenols	41.1	-	Metabolic pathways;Biosynthesis of secondary metabolites;Biosynthesis of various secondary metabolites - part 2	Metabolic pathways;Biosynthesis of secondary metabolites;Biosynthesis of various secondary metabolites - part 2	1.0623	1.0612	0.892	3.957e-05	0.0007674	3.9049	3.8618	3.8344	4.3443	4.3503	4.3113
neg_8059	1-Methyl-4-nitroimidazole	metab_17055	yes	up	C16621	neg	3034-41-1	108.02	2.023	M-H2O-H	C4H5N3O2	-	33	PW_C040688;HMDB0060659	-	-	-	-	-	Organoheterocyclic compounds	Azoles	Imidazoles	-	33	-	-	1.0446	1.0435	1.1876	0.002253	0.01017	2.8617	3.0749	2.9697	2.5362	2.5187	2.4465
neg_8110	(3,4,5,6-tetrahydroxyoxan-2-yl)methyl 4-hydroxybenzoate	metab_17106	yes	up	-	neg	-	345.083	1.95627	M+FA-H	C13H16O8	-	40.1	-	-	-	-	-	-	-	-	-	-	40.1	-	-	1.4628	1.4617	1.2592	0.0001204	0.001551	4.3903	4.307	4.2881	3.3715	3.4004	3.5379
neg_8138	Lepidimoic acid	metab_17134	yes	up	-	neg	157676-09-0	343.067	1.93463	M+Na-2H	C12H18O10	-	76.1	HMDB0041096	-	-	-	-	-	Organic oxygen compounds	Organooxygen compounds	Carbohydrates and carbohydrate conjugates	-	76.1	-	-	2.2748	2.2734	1.9167	2.48e-05	0.000564	4.5412	4.4	4.5243	2.4461	2.4088	2.1706
neg_8145	5,7-Dihydroxy-4H-1-benzopyran-4-one	metab_17141	yes	up	C09001	neg	31721-94-5	223.024	1.93463	M+FA-H	C9H6O4	-	70.2	HMDB0032950	-	-	-	-	-	Organoheterocyclic compounds	Benzopyrans	1-benzopyrans	-	70.2	-	-	1.4848	1.4839	1.2952	9.083e-05	0.001294	4.1006	4.0007	3.983	3.1844	3.1153	3.0305
neg_8160	Benzyl beta-primeveroside	metab_17156	yes	up	-	neg	130622-31-0	401.145	1.91197	M-H	C18H26O10	-	58.2	HMDB0041190	-	-	-	-	-	Organic oxygen compounds	Organooxygen compounds	Carbohydrates and carbohydrate conjugates	-	58.2	-	-	2.1978	2.1981	2.1037	0.0007223	0.004956	4.1174	3.6256	3.9388	1.7026	2.178	1.6709
neg_8183	N-Feruloylglycyl-L-phenylalanine	metab_17179	yes	up	-	neg	40747-82-8	435.093	1.88938	M+K-2H	C21H22N2O6	-	56.9	HMDB0029356	-	-	-	-	-	Organic acids and derivatives	Carboxylic acids and derivatives	Amino acids, peptides, and analogues	-	56.9	-	-	2.1342	2.1324	1.7717	3.105e-06	0.0001454	4.2943	4.2698	4.4062	2.4948	2.4012	2.4232
neg_8189	Pelargonidin	metab_17185	yes	up	C05904	neg	134-04-3;7690-51-9	269.046	1.88938	M-H	C15H10O5	60.2	-	HMDB0003263;LMPK12010003	-	-	map01100;map00942;map00941;map01110	Metabolism;Metabolism;Metabolism;Metabolism	Global and overview maps;Biosynthesis of other secondary metabolites;Biosynthesis of other secondary metabolites;Global and overview maps	Phenylpropanoids and polyketides	Flavonoids	Hydroxyflavonoids	60.2	-	Metabolic pathways;Anthocyanin biosynthesis;Flavonoid biosynthesis;Biosynthesis of secondary metabolites	Metabolic pathways;Anthocyanin biosynthesis;Flavonoid biosynthesis;Biosynthesis of secondary metabolites	1.0075	1.006	1.181	0.005142	0.01762	2.8873	2.9826	2.8407	2.3956	2.3851	2.5952
neg_8408	2-amino-3-methylbutanedioic acid	metab_17403	yes	down	-	neg	-	146.045	1.66145	M-H	C5H9NO4	61.4	-	-	-	-	-	-	-	-	-	-	61.4	-	-	-	1.0529	1.0524	0.8368	0.02992	0.05838	2.8533	2.7535	2.6244	3.551	3.245	3.0415
neg_8480	6-(2,4-dihydroxy-5-methoxybenzoyloxy)-3,4,5-trihydroxyoxane-2-carboxylic acid	metab_17475	yes	up	-	neg	-	359.062	1.61653	M-H	C14H16O11	-	56.4	-	-	-	-	-	-	-	-	-	-	56.4	-	-	2.2195	2.2168	1.9733	0.000831	0.005509	4.2546	4.2284	4.1736	2.4768	1.7012	2.2346
neg_8557	Casuarine 6-alpha-D-glucoside	metab_17552	yes	down	-	neg	186795-20-0	366.14	1.5037	M-H	C14H25NO10	-	40.6	HMDB0031999	-	-	-	-	-	Organic oxygen compounds	Organooxygen compounds	Carbohydrates and carbohydrate conjugates	-	40.6	-	-	1.1356	1.1336	0.8683	0.003586	0.01377	3.6678	3.5877	3.7951	4.1442	4.3739	4.2099
neg_8573	Lactosamine	metab_17568	yes	up	C00203	neg	13000-25-4	322.114	1.45982	M-H2O-H	C12H23NO10	-	69.1	HMDB0006591	-	-	map01100;map00520	Metabolism;Metabolism	Global and overview maps;Carbohydrate metabolism	Lipids and lipid-like molecules	Fatty Acyls	Fatty acyl glycosides	-	69.1	Metabolic pathways;Amino sugar and nucleotide sugar metabolism	Metabolic pathways;Amino sugar and nucleotide sugar metabolism	1.7362	1.7349	1.3544	5.254e-06	0.0002136	4.7267	4.8264	4.7528	3.4962	3.5692	3.4991
neg_8692	O-Succinyl-L-homoserine	metab_17686	yes	down	C01118	neg	1492-23-5	218.066	1.0313	M-H	C8H13NO6	31	-	HMDB0255868	-	-	map01100;map00270;map01110;map00920;map01230	Metabolism;Metabolism;Metabolism;Metabolism;Metabolism	Global and overview maps;Amino acid metabolism;Global and overview maps;Energy metabolism;Global and overview maps	Organic acids and derivatives	Carboxylic acids and derivatives	Amino acids, peptides, and analogues	31	-	Metabolic pathways;Cysteine and methionine metabolism;Biosynthesis of secondary metabolites;Sulfur metabolism;Biosynthesis of amino acids	Metabolic pathways;Cysteine and methionine metabolism;Biosynthesis of secondary metabolites;Sulfur metabolism;Biosynthesis of amino acids	1.0245	1.0238	0.8937	0.001431	0.007701	3.6799	3.7916	3.8273	4.2335	4.2637	4.1441
neg_46	(-)-Epicatechin	metab_18184	yes	down	C09727	neg	490-46-0;154-23-4	289.072	2.04542	M+Na-2H, M+Cl, M-H	C15H14O6	92.1	-	HMDB0001871;HMDB0002780	-	-	map01100;map00941;map01110	Metabolism;Metabolism;Metabolism	Global and overview maps;Biosynthesis of other secondary metabolites;Global and overview maps	Phenylpropanoids and polyketides	Flavonoids	Flavans	92.1	-	Metabolic pathways;Flavonoid biosynthesis;Biosynthesis of secondary metabolites	Metabolic pathways;Flavonoid biosynthesis;Biosynthesis of secondary metabolites	2.3099	2.3084	0.6102	0.0001176	0.001535	3.5655	3.556	3.326	5.9478	5.6532	5.5182
neg_8368	Ascorbic acid	metab_18186	yes	up	C00072	neg	50-81-7	197.008	1.70663	M+Na-2H	C6H8O6	-	58.8	HMDB0000044;PW_C000031	Vitamins and cofactors	Vitamins	map01100;map00480;map01110;map00053;map01240	Metabolism;Metabolism;Metabolism;Metabolism;Metabolism	Global and overview maps;Metabolism of other amino acids;Global and overview maps;Carbohydrate metabolism;Global and overview maps	Organoheterocyclic compounds	Dihydrofurans	Furanones	-	58.8	Metabolic pathways;Glutathione metabolism;Biosynthesis of secondary metabolites;Ascorbate and aldarate metabolism;Biosynthesis of cofactors	Metabolic pathways;Glutathione metabolism;Biosynthesis of secondary metabolites;Ascorbate and aldarate metabolism;Biosynthesis of cofactors	1.8322	1.8301	1.4658	0.0001298	0.001644	4.3777	4.4327	4.3867	3.1805	2.86	2.9613
neg_8648	Isocitrate	metab_18191	yes	up	C00311	neg	6061-97-8;320-77-4	191.019	1.2299	M-H	C6H8O7	76	-	HMDB0304324;HMDB0001874;HMDB0000193	Organic acids	Carboxylic acids	map01100;map00630;map01110;map01240;map01210;map01200;map01230;map00020	Metabolism;Metabolism;Metabolism;Metabolism;Metabolism;Metabolism;Metabolism;Metabolism	Global and overview maps;Carbohydrate metabolism;Global and overview maps;Global and overview maps;Global and overview maps;Global and overview maps;Global and overview maps;Carbohydrate metabolism	Organic acids and derivatives	Carboxylic acids and derivatives	Tricarboxylic acids and derivatives	76	-	Metabolic pathways;Glyoxylate and dicarboxylate metabolism;Biosynthesis of secondary metabolites;Biosynthesis of cofactors;2-Oxocarboxylic acid metabolism;Carbon metabolism;Biosynthesis of amino acids;Citrate cycle (TCA cycle)	Metabolic pathways;Glyoxylate and dicarboxylate metabolism;Biosynthesis of secondary metabolites;Biosynthesis of cofactors;2-Oxocarboxylic acid metabolism;Carbon metabolism;Biosynthesis of amino acids;Citrate cycle (TCA cycle)	1.1167	1.116	1.0897	0.003311	0.01301	6.672	6.5397	6.4983	6.1656	5.9748	5.9475
neg_6587	Phloretin	metab_18195	yes	up	C00774	neg	7507-89-3;60-82-2	273.077	4.53737	M-H	C15H14O5	55.7	-	LMPK12120525;HMDB0029646;HMDB0003306	-	-	map00941;map01110	Metabolism;Metabolism	Biosynthesis of other secondary metabolites;Global and overview maps	Organic oxygen compounds	Organooxygen compounds	Carbonyl compounds	55.7	-	Flavonoid biosynthesis;Biosynthesis of secondary metabolites	Flavonoid biosynthesis;Biosynthesis of secondary metabolites	1.158	1.1559	1.1686	0.003903	0.01462	4.0491	4.1375	3.9339	3.5983	3.3315	3.4426
