# Supplementary material for: Metabolomics Reveals Antioxidant Metabolites in Colored Rice Grains
Source: Metabolites. 2024 Feb 11;14(2):120. doi: 10.3390/metabo14020120 (PMC10891847; doi:10.3390/metabo14020120)
Supplement: Supplementary file 1 [file metabolites-14-00120-s001.zip › Table S4.xls]

## Sheet: Difference between groups
Table S4. DM information of YZ6H and HN comparison groups
ID	Metabolite	Metab ID	Significant	Regulate	KEGG Compound ID	Mode	CAS ID	M/Z	Retention time	Adducts	Formula	Fragmentation Score	Theoretical Fragmentation Score	Library ID	KEGG Compound First Category	KEGG Compound Second Category	KEGG Pathway ID	KEGG Pathway First Category	KEGG Pathway Second Category	HMDB Superclass	HMDB Class	HMDB Subclass	Fragmentation Score	Theoretical Fragmentation Score	KEGG Pathway Description	KEGG Pathway Description	VIP_pred_OPLS-DA	VIP_PLS-DA	FC(YZ6H/HN)	P_value	FDR	YZ6H_1	YZ6H_2	YZ6H_3	HN_1	HN_2	HN_3
pos_7	9,12,13-TriHOME	metab_6	yes	down	C14833	pos	-	353.229	5.31835	M+H-2H2O, M+Na, M+NH4, M+2Na-H, 2M+Na, 2M+K, M+H-H2O	C18H34O5	-	47.7	LMFA02000014;HMDB0004708	-	-	map00591	Metabolism	Lipid metabolism	Lipids and lipid-like molecules	Fatty Acyls	Fatty acids and conjugates	-	47.7	Linoleic acid metabolism	Linoleic acid metabolism	1.0606	1.0623	0.9299	0.0125	0.02953	6.2166	6.0403	6.2061	6.5494	6.7982	6.506
pos_31	9-OxoODE	metab_30	yes	down	C14766	pos	-	277.216	7.39763	M+H-H2O, M+H, M+Na, M+K, M+H-2H2O	C18H30O3	65.7	-	HMDB0004669;LMFA02000251;LMFA02000274	-	-	map00591	Metabolism	Lipid metabolism	Lipids and lipid-like molecules	Fatty Acyls	Lineolic acids and derivatives	65.7	-	Linoleic acid metabolism	Linoleic acid metabolism	1.036	1.0417	0.9268	0.0499	0.08601	6.3632	6.2852	6.2778	6.4582	7.0359	6.9269
pos_48	NORCANTHARIDIN	metab_47	yes	up	-	pos	-	151.039	1.83447	M+H, 2M+NH4, M+H-H2O, M+CH3OH+H	C8H8O4	49.9	-	-	-	-	-	-	-	-	-	-	49.9	-	-	-	1.3355	1.3335	1.158	0.0002779	0.00317	4.9145	4.9655	4.892	4.1518	4.3238	4.2807
pos_67	C9:2n-2,4	metab_66	yes	down	-	pos	-	155.107	7.81157	M+H, 2M+ACN+H, M+NH4, M+H-H2O	C9H14O2	68.7	-	LMFA01030450	-	-	-	-	-	-	-	-	68.7	-	-	-	1.2493	1.2477	0.884	0.004843	0.01616	4.7688	4.598	4.7217	5.3082	5.1464	5.4802
pos_76	Bicyclo-PGE2	metab_75	yes	up	-	pos	-	357.203	5.95508	M+H, M+K, 2M+Na, M+Na	C20H30O4	88.7	-	HMDB0060054;LMFA03010034	-	-	-	-	-	Lipids and lipid-like molecules	Fatty Acyls	Eicosanoids	88.7	-	-	-	1.3069	1.3091	1.1517	0.02802	0.05479	5.5665	5.9415	5.3881	5.1596	4.8602	4.6498
pos_94	2-amino-6-hydroxyhexanoic acid	metab_93	yes	up	-	pos	-	130.086	0.687917	M+H-H2O, M+ACN+H, M+H, M+H-2H2O	C6H13NO3	-	49.4	-	-	-	-	-	-	-	-	-	-	49.4	-	-	1.0928	1.0935	1.0946	5.251e-05	0.001252	5.1941	5.2062	5.1866	4.7941	4.716	4.7319
pos_99	N-Acetyl-L-glutamate 5-semialdehyde	metab_97	yes	up	C01250	pos	13074-21-0	138.055	0.67	M+H-2H2O, M+H, M+CH3OH+H, M+NH4	C7H11NO4	-	65.3	HMDB0006488	-	-	map01100;map00220;map01110;map01210;map00330;map01230	Metabolism;Metabolism;Metabolism;Metabolism;Metabolism;Metabolism	Global and overview maps;Amino acid metabolism;Global and overview maps;Global and overview maps;Amino acid metabolism;Global and overview maps	Organic acids and derivatives	Carboxylic acids and derivatives	Amino acids, peptides, and analogues	-	65.3	Metabolic pathways;Arginine biosynthesis;Biosynthesis of secondary metabolites;2-Oxocarboxylic acid metabolism;Arginine and proline metabolism;Biosynthesis of amino acids	Metabolic pathways;Arginine biosynthesis;Biosynthesis of secondary metabolites;2-Oxocarboxylic acid metabolism;Arginine and proline metabolism;Biosynthesis of amino acids	1.2834	1.2847	1.1157	0.001887	0.009089	6.2289	5.987	6.2372	5.5677	5.5102	5.4622
pos_158	Prunitrin	metab_156	yes	down	-	pos	154-36-9	429.118	2.47772	M+H-H2O, M+H, M+H-2H2O	C22H22O10	-	64.9	HMDB0034149	-	-	-	-	-	Phenylpropanoids and polyketides	Isoflavonoids	Isoflavonoid O-glycosides	-	64.9	-	-	2.6663	2.6676	0.0624	5.247e-05	0.001252	0.182	0.1775	0.1734	2.57	2.9012	3.0658
pos_165	(E)-2-Methyl-2-buten-1-ol O-beta-D-Glucopyranoside	metab_163	yes	up	-	pos	-	293.092	2.83688	M+Na, M+2Na-H, M+H-H2O	C11H20O6	-	57.9	HMDB0033064	-	-	-	-	-	Lipids and lipid-like molecules	Fatty Acyls	Fatty acyl glycosides	-	57.9	-	-	1.48	1.4839	1.2602	0.01914	0.04081	4.4478	4.7929	4.2401	3.9163	3.2963	3.4864
pos_223	Humuladienone	metab_220	yes	down	-	pos	24405-90-1	238.216	6.94178	M+H, M+NH4, M+H-H2O	C15H24O	-	69.7	HMDB0038208	-	-	-	-	-	Lipids and lipid-like molecules	Prenol lipids	Sesquiterpenoids	-	69.7	-	-	1.2027	1.2015	0.8597	0.03792	0.06928	4.0545	3.8665	3.902	4.7706	4.8028	4.1793
pos_224	Phytosphingosine	metab_221	yes	up	C12144	pos	554-62-1	318.3	7.02868	M+H, M+Na, M+H-H2O	C18H39NO3	-	41.7	HMDB0004610;LMSP01030001	-	-	map00600;map01100	Metabolism;Metabolism	Lipid metabolism;Global and overview maps	Organic nitrogen compounds	Organonitrogen compounds	Amines	-	41.7	Sphingolipid metabolism;Metabolic pathways	Sphingolipid metabolism;Metabolic pathways	1.256	1.2555	1.0938	0.0001188	0.001971	6.8653	6.9927	6.8863	6.3185	6.3144	6.3331
pos_225	Cortol	metab_222	yes	up	C05482	pos	516-38-1	391.245	6.76637	M+H, M+Na, M+H-H2O	C21H36O5	-	35.3	LMST02030228;HMDB0003180	-	-	-	-	-	Lipids and lipid-like molecules	Steroids and steroid derivatives	Hydroxysteroids	-	35.3	-	-	1.3218	1.3213	1.1383	0.001502	0.007957	5.549	5.6374	5.4043	4.903	4.9211	4.7505
pos_315	LPA(18:2(9Z,12Z)/0:0)	metab_312	yes	down	C00681	pos	-	435.25	7.8336	M+H, M+NH4, M+2Na-H	C21H39O7P	43.3	-	HMDB0007856;LMGP10050017;PW_C003907	-	-	map01100;map00564;map01110;map00561	Metabolism;Metabolism;Metabolism;Metabolism	Global and overview maps;Lipid metabolism;Global and overview maps;Lipid metabolism	Lipids and lipid-like molecules	Glycerophospholipids	Glycerophosphates	43.3	-	Metabolic pathways;Glycerophospholipid metabolism;Biosynthesis of secondary metabolites;Glycerolipid metabolism	Metabolic pathways;Glycerophospholipid metabolism;Biosynthesis of secondary metabolites;Glycerolipid metabolism	1.975	1.9744	0.6332	0.0004937	0.004292	2.8182	2.4075	2.4404	3.9852	3.9738	4.1468
pos_320	Methyl 9,10-epoxy-12,15-octadecadienoate	metab_317	yes	down	-	pos	-	309.242	7.89832	M+H-H2O, M+Na, M+H	C19H32O3	63.6	-	LMFA01070012	-	-	-	-	-	-	-	-	63.6	-	-	-	1.5624	1.5642	0.7809	0.003012	0.01207	3.375	3.6551	3.1694	4.2644	4.3736	4.4253
pos_322	4-hydroxy Nonenal Alkyne	metab_319	yes	down	-	pos	-	194.115	7.81157	M+H, M+NH4, M+ACN+H	C9H12O2	76	-	-	-	-	-	-	-	-	-	-	76	-	-	-	1.3631	1.3617	0.8587	0.002281	0.01022	4.452	4.2643	4.3896	5.0818	4.9387	5.2432
pos_357	4,4alpha,5,6-Tetrahydro-7-methyl-2(3H)-naphthalenone	metab_354	yes	down	-	pos	34545-88-5	195.138	5.31835	M+H, M+CH3OH+H, M+H-H2O	C11H14O	62.3	-	HMDB0039803	-	-	-	-	-	Organic oxygen compounds	Organooxygen compounds	Carbonyl compounds	62.3	-	-	-	1.0402	1.0424	0.919	0.01488	0.03376	5.1709	4.992	5.186	5.4624	5.7474	5.4909
pos_358	Cis-3-Hexenyl pentanoate	metab_355	yes	down	-	pos	35852-46-1	149.132	5.31835	M+H-2H2O, M+H-H2O, M+Na	C11H20O2	-	51.1	LMFA07010807;HMDB0031691	-	-	-	-	-	Lipids and lipid-like molecules	Fatty Acyls	Fatty acid esters	-	51.1	-	-	1.0222	1.0241	0.9181	0.01215	0.02891	4.8694	4.7184	4.8775	5.1665	5.4205	5.1689
pos_377	Fructoselysine	metab_374	yes	down	C16488	pos	-	309.169	4.15628	M+H, M+Na, M+H-H2O	C12H24N2O7	54.6	-	HMDB0242138;HMDB0252495	-	-	-	-	-	Organic acids and derivatives	Carboxylic acids and derivatives	Amino acids, peptides, and analogues	54.6	-	-	-	1.0605	1.0571	0.8923	0.02295	0.04707	3.9748	3.917	3.9715	4.6594	4.4302	4.204
pos_385	Isorhamnetin-3-O-glucoside	metab_382	yes	up	-	pos	-	501.1	3.40565	M+Na, M+K, M+H	C22H22O12	97.9	-	-	-	-	-	-	-	-	-	-	97.9	-	-	-	2.0314	2.0302	1.4071	7.948e-06	0.0004137	5.2581	5.324	5.3876	3.7204	3.8473	3.7827
pos_409	Dryopteric acid	metab_405	yes	up	-	pos	-	349.092	2.77025	M+H, M+ACN+H, M+H-H2O	C17H16O8	39.3	-	LMPK12020078	-	-	-	-	-	-	-	-	39.3	-	-	-	1.2029	1.201	1.1508	0.0005857	0.00475	4.2333	4.1544	4.1821	3.5423	3.7066	3.6754
pos_410	1-O-E-Cinnamoyl-(6-arabinosylglucose)	metab_406	yes	up	-	pos	181373-66-0	460.181	2.68013	M+NH4, M+K, M+H-2H2O	C20H26O11	-	48.5	HMDB0030294	-	-	-	-	-	Phenylpropanoids and polyketides	Cinnamic acids and derivatives	Cinnamic acid esters	-	48.5	-	-	1.6351	1.6343	1.3117	0.002517	0.01082	4.6443	4.2224	4.2366	3.3039	3.4571	3.2275
pos_422	D-(+)-Galactosamine	metab_418	yes	up	-	pos	-	180.087	2.32748	M+H, 2M+Na, 2M+NH4	C6H13NO5	55.8	-	-	-	-	-	-	-	-	-	-	55.8	-	-	-	1.1096	1.1087	1.1053	1.454e-05	0.000631	4.8163	4.8501	4.8141	4.3409	4.3884	4.3724
pos_423	3-O-Caffeoylshikimic acid	metab_419	yes	up	-	pos	6082-44-6	301.07	2.28422	M+H-2H2O, M+CH3OH+H, M+H-H2O	C16H16O8	-	75.7	HMDB0030654	-	-	-	-	-	Phenylpropanoids and polyketides	Cinnamic acids and derivatives	Hydroxycinnamic acids and derivatives	-	75.7	-	-	1.8222	1.8211	1.2413	1.631e-05	0.0006648	6.3689	6.3478	6.4196	5.0488	5.1682	5.199
pos_428	Gamma-Glu-Leu	metab_424	yes	down	-	pos	2566-39-4	261.144	2.15398	M+H, M+Na, M+H-2H2O	C11H20N2O5	88.3	-	HMDB0011171	-	-	-	-	-	Organic acids and derivatives	Carboxylic acids and derivatives	Amino acids, peptides, and analogues	88.3	-	-	-	1.776	1.7775	0.7078	0.01917	0.04084	3.4809	3.6542	2.5286	4.5564	4.5198	4.5763
pos_434	Quercetin 3-beta-D-glucoside	metab_430	yes	up	C05623	pos	482-35-9	465.103	1.9002	M+H, M+Na, M+H-H2O	C21H20O12	44.1	-	HMDB0037362	-	-	map01100;map01110;map00944	Metabolism;Metabolism;Metabolism	Global and overview maps;Global and overview maps;Biosynthesis of other secondary metabolites	Phenylpropanoids and polyketides	Flavonoids	Flavonoid glycosides	44.1	-	Metabolic pathways;Biosynthesis of secondary metabolites;Flavone and flavonol biosynthesis	Metabolic pathways;Biosynthesis of secondary metabolites;Flavone and flavonol biosynthesis	1.6357	1.633	1.2972	0.0004597	0.004129	4.3949	4.4198	4.4361	3.2153	3.514	3.4865
pos_460	L-Valine	metab_456	yes	down	C00183	pos	72-18-4	118.086	0.6338	M+H, M+K, 2M+H	C5H11NO2	71.6	-	PW_C000704;HMDB0000883	Peptides	Amino acids	map01100;map01110;map00280;map01240;map01210;map00460;map02010;map01230;map00966;map00290;map00970;map00770	Metabolism;Metabolism;Metabolism;Metabolism;Metabolism;Metabolism;Environmental Information Processing;Metabolism;Metabolism;Metabolism;Genetic Information Processing;Metabolism	Global and overview maps;Global and overview maps;Amino acid metabolism;Global and overview maps;Global and overview maps;Metabolism of other amino acids;Membrane transport;Global and overview maps;Biosynthesis of other secondary metabolites;Amino acid metabolism;Translation;Metabolism of cofactors and vitamins	Organic acids and derivatives	Carboxylic acids and derivatives	Amino acids, peptides, and analogues	71.6	-	Metabolic pathways;Biosynthesis of secondary metabolites;Valine, leucine and isoleucine degradation;Biosynthesis of cofactors;2-Oxocarboxylic acid metabolism;Cyanoamino acid metabolism;ABC transporters;Biosynthesis of amino acids;Glucosinolate biosynthesis;Valine, leucine and isoleucine biosynthesis;Aminoacyl-tRNA biosynthesis;Pantothenate and CoA biosynthesis	Metabolic pathways;Biosynthesis of secondary metabolites;Valine, leucine and isoleucine degradation;Biosynthesis of cofactors;2-Oxocarboxylic acid metabolism;Cyanoamino acid metabolism;ABC transporters;Biosynthesis of amino acids;Glucosinolate biosynthesis;Valine, leucine and isoleucine biosynthesis;Aminoacyl-tRNA biosynthesis;Pantothenate and CoA biosynthesis	1.004	1.0015	0.9275	0.03454	0.0644	5.6653	5.7157	5.6146	6.324	6.1473	5.8525
pos_483	Stachyose	metab_479	yes	down	C01613	pos	10094-58-3;470-55-3;470-55-3	689.211	1.18488	M+NH4, M+Na, M+K	C24H42O21	53.1	-	PW_C001923;HMDB0003553	-	-	map01100;map00052	Metabolism;Metabolism	Global and overview maps;Carbohydrate metabolism	Organic oxygen compounds	Organooxygen compounds	Carbohydrates and carbohydrate conjugates	53.1	-	Metabolic pathways;Galactose metabolism	Metabolic pathways;Galactose metabolism	1.7704	1.7651	0.7205	0.008405	0.02233	3.1345	3.3109	3.2676	4.9966	4.3106	4.1755
pos_606	(R)-b-amino-isobutyric acid	metab_601	yes	down	C01205	pos	-	104.071	0.6338	M+H-H2O, M+H	C4H9NO2	69.1	-	LMFA01100049	-	-	map00240;map01100;map00280	Metabolism;Metabolism;Metabolism	Nucleotide metabolism;Global and overview maps;Amino acid metabolism	-	-	-	69.1	-	Pyrimidine metabolism;Metabolic pathways;Valine, leucine and isoleucine degradation	Pyrimidine metabolism;Metabolic pathways;Valine, leucine and isoleucine degradation	1.7301	1.7288	0.8021	0.0001343	0.002081	4.6007	4.6281	4.4352	5.7671	5.596	5.6743
pos_844	3,7,3',4'-Tetrahydroxy-8-methoxyflavone	metab_838	yes	up	-	pos	-	317.066	1.64665	M+H-H2O, M+H	C16H12O7	43.2	-	LMPK12111607	-	-	-	-	-	-	-	-	43.2	-	-	-	1.8303	1.8296	1.4746	0.001497	0.007946	4.2563	3.8851	3.865	2.587	2.6269	2.9268
pos_873	4-Hydroxy-3-methoxycinnamaldehyde	metab_867	yes	down	C02666	pos	458-36-6;20649-42-7	179.07	1.70598	M+H, M+NH4	C10H10O3	36.7	-	HMDB0141782	-	-	map01100;map00940;map01110	Metabolism;Metabolism;Metabolism	Global and overview maps;Biosynthesis of other secondary metabolites;Global and overview maps	Benzenoids	Phenols	Methoxyphenols	36.7	-	Metabolic pathways;Phenylpropanoid biosynthesis;Biosynthesis of secondary metabolites	Metabolic pathways;Phenylpropanoid biosynthesis;Biosynthesis of secondary metabolites	1.021	1.022	0.926	0.004703	0.01588	5.1876	5.0517	5.2629	5.5053	5.6277	5.6066
pos_904	4-Hydroxy-5-(3',4'-dihydroxyphenyl)-valeric acid-O-methyl-O-glucuronide	metab_898	yes	up	-	pos	-	452.176	1.79115	M+NH4, M+Na	C18H26O12	-	43.4	HMDB0059972	-	-	-	-	-	Organic oxygen compounds	Organooxygen compounds	Carbohydrates and carbohydrate conjugates	-	43.4	-	-	1.8063	1.8025	1.5219	0.03988	0.07195	4.8806	3.5809	4.2665	2.1829	3.0087	3.1732
pos_921	Procyanidin C1	metab_915	yes	down	C17624	pos	37064-30-5	867.212	1.83447	M+H, M+Na	C45H38O18	-	41.4	HMDB0038370	-	-	-	-	-	Phenylpropanoids and polyketides	Flavonoids	Biflavonoids and polyflavonoids	-	41.4	-	-	2.3014	2.3019	0.6387	0.0003727	0.00369	3.203	3.7164	3.7175	5.4654	5.5319	5.6592
pos_939	3,4-Dimethoxyphenyl methyl ketone	metab_933	yes	up	-	pos	1131-62-0	181.086	1.9002	M+H-H2O, M+H	C10H12O3	82.4	-	HMDB0301758	-	-	-	-	-	Organic oxygen compounds	Organooxygen compounds	Carbonyl compounds	82.4	-	-	-	1.2407	1.2391	1.1467	0.0005806	0.004738	4.5211	4.6647	4.5095	3.9285	4.0366	3.9791
pos_941	Delphinidin	metab_935	yes	up	C05908	pos	13270-61-6;528-53-0	285.039	1.9002	M+H-H2O, M+H	C15H10O7	52.8	-	LMPK12010001;HMDB0003074	-	-	map00942;map00941;map01110	Metabolism;Metabolism;Metabolism	Biosynthesis of other secondary metabolites;Biosynthesis of other secondary metabolites;Global and overview maps	Phenylpropanoids and polyketides	Flavonoids	Hydroxyflavonoids	52.8	-	Anthocyanin biosynthesis;Flavonoid biosynthesis;Biosynthesis of secondary metabolites	Anthocyanin biosynthesis;Flavonoid biosynthesis;Biosynthesis of secondary metabolites	3.3796	3.3791	6.7859	1.332e-09	4.915e-06	4.9773	4.9771	5.0199	0.7519	0.726	0.7286
pos_964	Citrusin E	metab_958	yes	down	-	pos	134860-03-0	395.131	1.98207	M+Na, M+K	C17H24O9	-	56.9	HMDB0039234	-	-	-	-	-	Organic oxygen compounds	Organooxygen compounds	Carbohydrates and carbohydrate conjugates	-	56.9	-	-	1.5614	1.5566	0.772	0.01376	0.03184	3.559	3.3385	3.2696	4.6128	3.9455	4.6104
pos_994	Kynurenic acid	metab_988	yes	down	C01717	pos	492-27-3	222.076	2.13353	M+H, M+CH3OH+H	C10H7NO3	62.5	-	PW_C000566;HMDB0000715	-	-	map01100;map00380	Metabolism;Metabolism	Global and overview maps;Amino acid metabolism	Organoheterocyclic compounds	Quinolines and derivatives	Quinoline carboxylic acids	62.5	-	Metabolic pathways;Tryptophan metabolism	Metabolic pathways;Tryptophan metabolism	1.4983	1.499	0.7815	0.001917	0.009173	3.22	3.2231	2.8707	3.9297	3.9711	4.0184
pos_1001	Oleuroside	metab_995	yes	down	-	pos	116383-31-4	579.15	2.15398	M+CH3OH+H, M+K	C25H32O13	-	60	HMDB0035352	-	-	-	-	-	Lipids and lipid-like molecules	Prenol lipids	Sesquiterpenoids	-	60	-	-	2.089	2.088	0.6781	0.0002961	0.00329	3.6732	3.212	3.5299	5.1053	5.0745	5.1793
pos_1003	Butyl 3-O-caffeoylquinate	metab_997	yes	down	-	pos	132741-56-1	393.152	2.17605	M+H-H2O, M+ACN+Na	C20H26O9	-	52.9	HMDB0034588	-	-	-	-	-	Organic oxygen compounds	Organooxygen compounds	Alcohols and polyols	-	52.9	-	-	1.5266	1.5273	0.7959	0.0003658	0.003641	3.4684	3.5592	3.3027	4.3131	4.3745	4.2918
pos_1004	Carboxybupranolol, 4-chloro-3-[3-(1,1-dimethylethylamino)-2-hydroxy-propyloxy]benzoic acid	metab_998	yes	down	-	pos	-	319.14	2.17605	M+H, M+NH4	C14H20ClNO4	-	37.4	HMDB0061131	-	-	-	-	-	Benzenoids	Benzene and substituted derivatives	Benzoic acids and derivatives	-	37.4	-	-	1.6861	1.6832	0.6287	0.007288	0.02137	2.117	2.081	1.5668	3.3329	2.8931	2.946
pos_1035	Zingerone	metab_1029	yes	up	C17497	pos	122-48-5	195.102	2.32748	M+H, M+NH4	C11H14O3	77.8	-	HMDB0032590	-	-	-	-	-	Benzenoids	Phenols	Methoxyphenols	77.8	-	-	-	1.2568	1.2559	1.1399	5.188e-05	0.001251	4.8218	4.7891	4.8573	4.1908	4.2784	4.2249
pos_1086	Epi-4'-hydroxyjasmonic acid	metab_1080	yes	up	-	pos	-	227.128	2.54483	M+H-H2O, M+H	C12H18O4	31.5	-	LMFA02020008	-	-	-	-	-	-	-	-	31.5	-	-	-	1.5299	1.5294	1.1857	1.168e-06	0.0001326	5.5521	5.6037	5.5488	4.6866	4.7004	4.7
pos_1098	4'-O-Methyl-(-)-epicatechin 3'-O-glucuronide	metab_1092	yes	up	-	pos	-	481.134	2.58998	M+H, M+K	C22H24O12	-	38	HMDB0041674	-	-	-	-	-	Phenylpropanoids and polyketides	Flavonoids	Flavonoid glycosides	-	38	-	-	1.9451	1.9452	1.4408	1.118e-06	0.0001288	4.6168	4.5651	4.6545	3.2273	3.1936	3.1813
pos_1124	Morin 3,7,4'-trimethyl ether 2'-glucoside	metab_1118	yes	up	-	pos	-	507.15	2.70265	M+H, M+CH3OH+H	C24H26O12	48	-	LMPK12112511	-	-	-	-	-	-	-	-	48	-	-	-	1.3866	1.3856	1.2052	0.009132	0.02349	4.6515	4.4948	4.5413	3.6115	3.6449	4.1004
pos_1127	(7'x,8'x)-4,7'-Epoxy-3,8'-bilign-7-ene-3,5'-dimethoxy-4',9,9'-triol	metab_1121	yes	down	-	pos	-	359.149	2.72525	M+H-2H2O, M+H	C20H22O6	37.1	-	HMDB0041276	-	-	-	-	-	Phenylpropanoids and polyketides	2-arylbenzofuran flavonoids	Not Available	37.1	-	-	-	1.0094	1.0137	0.8663	0.04422	0.0781	2.8364	3.0366	3.1875	3.2626	3.6922	3.5018
pos_1141	5-O-Methylvisamminol	metab_1135	yes	up	C09016	pos	80681-42-1	273.112	2.77025	M+H-H2O, M+H	C16H18O5	31.5	-	LMPK13110002	-	-	-	-	-	-	-	-	31.5	-	-	-	1.7409	1.7379	1.3625	0.0007229	0.005285	4.2713	4.3153	4.392	2.99	3.3936	3.142
pos_1165	5''-(4-Hydroxy-(E)-cinnamoyl) alpha-L-arabinofuranosyl-(1->3)-beta-D-xylopyranosyl-(1->4)-D-xylopyranoside	metab_1158	yes	up	-	pos	102254-69-3	599.14	2.83688	M+Na, M+K	C24H32O15	-	54.9	HMDB0041489	-	-	-	-	-	Organic oxygen compounds	Organooxygen compounds	Carbohydrates and carbohydrate conjugates	-	54.9	-	-	1.6465	1.6449	1.2205	0.0006619	0.005085	5.6159	5.8168	5.6738	4.5478	4.6227	4.8454
pos_1182	3-hydroxy-3-methyl-4-phenylbutan-2-one	metab_1175	yes	up	-	pos	-	220.133	2.88232	M+ACN+H, 2M+H	C11H14O2	-	30.3	-	-	-	-	-	-	-	-	-	-	30.3	-	-	1.554	1.5514	1.3216	0.001398	0.007595	3.7769	3.8254	3.8021	2.6671	2.8907	3.0699
pos_1207	Echinone	metab_1200	yes	up	C10338	pos	80348-65-8	345.133	2.99538	M+H-H2O, M+H	C19H20O6	36.1	-	-	-	-	-	-	-	-	-	-	36.1	-	-	-	1.2454	1.2435	1.1698	0.02312	0.04732	4.4358	4.3483	4.8566	3.6953	3.9967	3.97
pos_1209	Neopetasitenine	metab_1202	yes	up	-	pos	60409-51-0	487.215	2.99538	M+H, M+ACN+Na	C21H29NO8	-	30.5	HMDB0030329	-	-	-	-	-	Organoheterocyclic compounds	Azaspirodecane derivatives	Not Available	-	30.5	-	-	2.0559	2.0488	2.2819	0.02063	0.04327	3.184	3.1766	3.1332	0.9413	2.3439	0.8772
pos_1226	4R,5R,6S-Trihydroxy-2-hydroxymethyl-2-cyclohexen-1-one 6-(2-hydroxy-6-methylbenzoate)	metab_1219	yes	up	-	pos	146475-71-0	331.081	3.06402	M+Na, 2M+Na	C15H16O7	-	53.4	HMDB0040692	-	-	-	-	-	Benzenoids	Benzene and substituted derivatives	Benzoic acids and derivatives	-	53.4	-	-	1.3567	1.3548	1.159	0.003964	0.01432	5.2317	5.4634	5.0706	4.4579	4.5946	4.5496
pos_1233	3-Methoxy-4-hydroxyphenylethylene glycol	metab_1226	yes	up	-	pos	-	167.07	3.10927	M+H-H2O, 2M+H	C9H12O4	48.8	-	-	-	-	-	-	-	-	-	-	48.8	-	-	-	1.8267	1.8258	1.306	2.919e-05	0.0009231	5.3529	5.4091	5.2183	4.0472	4.0982	4.0912
pos_1276	Phlorizin	metab_1269	yes	up	C01604	pos	60-81-1	437.144	3.26842	M+H-H2O, M+H	C21H24O10	-	68.8	HMDB0036634	-	-	map00941;map01110	Metabolism;Metabolism	Biosynthesis of other secondary metabolites;Global and overview maps	Phenylpropanoids and polyketides	Flavonoids	Flavonoid glycosides	-	68.8	Flavonoid biosynthesis;Biosynthesis of secondary metabolites	Flavonoid biosynthesis;Biosynthesis of secondary metabolites	1.3238	1.3236	1.1666	0.0001034	0.001851	4.5994	4.6172	4.6277	3.9317	3.8993	4.038
pos_1281	Citromitin	metab_1274	yes	up	-	pos	-	437.181	3.2912	M+H-H2O, M+CH3OH+H	C21H24O8	-	37	HMDB0037313	-	-	-	-	-	Phenylpropanoids and polyketides	Flavonoids	O-methylated flavonoids	-	37	-	-	1.0425	1.0402	1.0924	0.001653	0.008501	4.9467	4.9498	4.9004	4.4093	4.5697	4.5663
pos_1293	Clavirin I	metab_1286	yes	down	-	pos	-	291.159	3.33705	M+H-H2O, M+H	C17H22O4	41.1	-	LMFA03120025	-	-	-	-	-	-	-	-	41.1	-	-	-	1.8198	1.8224	0.7002	0.0013	0.007306	2.8888	3.1901	2.855	4.1305	4.4884	4.141
pos_1294	Hyperoside	metab_1287	yes	up	C10073	pos	482-36-0	465.103	3.13162	M+H, M+Na	C21H20O12	92.6	-	HMDB0030775	-	-	-	-	-	Phenylpropanoids and polyketides	Flavonoids	Flavonoid glycosides	92.6	-	-	-	3.2819	3.2806	4.3461	0.0006795	0.005136	5.2956	5.2768	5.4	0.81	0.7835	2.0829
pos_1304	Gamma-Glutamyl-S-methylcysteinyl-beta-alanine	metab_1297	yes	up	-	pos	102148-91-4	377.15	3.38282	M+ACN+H, 2M+ACN+H	C12H21N3O6S	-	47.6	HMDB0039504	-	-	-	-	-	Organic acids and derivatives	Peptidomimetics	Hybrid peptides	-	47.6	-	-	1.5545	1.5516	1.2608	0.007531	0.02191	4.4671	5.0206	4.5229	3.5431	3.7879	3.7815
pos_1321	6-(4-ethenyl-3-hydroxyphenoxy)-3,4,5-trihydroxyoxane-2-carboxylic acid	metab_1314	yes	up	-	pos	-	313.092	3.47398	M+H-H2O, M+H	C14H16O8	-	35	-	-	-	-	-	-	-	-	-	-	35	-	-	1.8576	1.8553	1.3302	0.000124	0.002012	5.1699	5.2739	5.2072	3.7573	4.0089	4.0006
pos_1409	5-Hydroxy-7-(4-hydroxy-3-methoxyphenyl)-1-phenyl-3-heptanone	metab_1402	yes	up	-	pos	79559-61-8	311.164	3.9292	M+H-H2O, M+Na	C20H24O4	-	63	HMDB0029524	-	-	-	-	-	Phenylpropanoids and polyketides	Diarylheptanoids	Linear diarylheptanoids	-	63	-	-	1.4156	1.416	1.2185	0.00245	0.01065	4.3624	4.4256	4.2442	3.6901	3.6412	3.3639
pos_1466	(2S,4S,6S)-2-[2-(4-Hydroxy-3-meyhoxyphenyl)ethyl]tetrahydro-6-(4,5-dihydroxy-3-methoxyphenyl)-2H-pyran-4-yl 4-acetate	metab_1459	yes	up	-	pos	182227-92-5	433.186	4.38253	M+H, M+Na	C23H28O8	-	36.5	HMDB0030503	-	-	-	-	-	Phenylpropanoids and polyketides	Diarylheptanoids	Linear diarylheptanoids	-	36.5	-	-	2.9663	2.9698	4.6507	0.0006863	0.005166	4.4261	4.4754	3.9376	1.5263	0.5092	0.7255
pos_1467	Gibberellin A2	metab_1460	yes	up	-	pos	-	351.18	4.15628	M+H, M+Na	C19H26O6	84.1	-	LMPR0104070003	-	-	-	-	-	-	-	-	84.1	-	-	-	1.1119	1.1146	1.143	0.02296	0.04707	4.2312	4.426	4.0478	3.9018	3.5831	3.6309
pos_1474	Pindone	metab_1467	yes	up	C19141	pos	83-26-1	231.101	4.45065	M+H-H2O, M+H	C14H14O3	63.7	-	HMDB0256560	-	-	-	-	-	Benzenoids	Indanes	Indanones	63.7	-	-	-	1.5106	1.5081	1.3997	0.0008737	0.00587	3.0757	3.0489	3.0047	1.991	2.2217	2.3104
pos_1504	1-(2-Furanyl)-2-propanone	metab_1497	yes	up	-	pos	6975-60-6	107.049	3.9292	M+H-H2O, M+ACN+Na	C7H8O2	-	42.5	HMDB0032917	-	-	-	-	-	Organoheterocyclic compounds	Heteroaromatic compounds	Not Available	-	42.5	-	-	1.3127	1.3122	1.1794	6.835e-06	0.000382	4.2449	4.2473	4.1901	3.5692	3.5812	3.6024
pos_1510	6''-O-Acetylglycitin	metab_1503	yes	up	-	pos	134859-96-4	521.165	3.0411	M+H, M+CH3OH+H	C24H24O11	-	76.3	HMDB0039489	-	-	-	-	-	Phenylpropanoids and polyketides	Isoflavonoids	Isoflavonoid O-glycosides	-	76.3	-	-	1.3712	1.3696	1.267	0.01714	0.03759	3.9749	3.5352	3.6508	2.7118	2.8741	3.2213
pos_1534	(all-E)-Crocetin	metab_1527	yes	up	-	pos	27876-94-4	329.175	5.03568	M+H-H2O, M+H	C20H24O4	43.1	-	HMDB0035098	-	-	-	-	-	Lipids and lipid-like molecules	Prenol lipids	Diterpenoids	43.1	-	-	-	1.1863	1.1899	1.1711	0.04645	0.08126	4.5025	4.6566	4.0622	4.0327	3.5675	3.6885
pos_1667	Ile Glu Leu	metab_1660	yes	up	-	pos	-	374.228	2.95002	M+H, M+Na	C17H31N3O6	90.3	-	-	-	-	-	-	-	-	-	-	90.3	-	-	-	1.3627	1.3617	1.4788	0.03242	0.06162	2.4827	2.9319	2.1101	1.7143	1.8347	1.5381
pos_1697	PGF2alpha methyl ester	metab_1690	yes	up	-	pos	-	351.253	6.48265	M+H-H2O, M+Na	C21H36O5	31.8	-	LMFA03010115	-	-	-	-	-	-	-	-	31.8	-	-	-	1.1909	1.1902	1.1244	0.001314	0.007346	4.9114	5.0082	4.8284	4.3921	4.4354	4.2882
pos_1708	Avocadyne	metab_1701	yes	down	-	pos	129099-96-3	302.269	6.5906	M+NH4, M+2Na-H	C17H32O3	-	30.8	HMDB0035473;LMFA05000643	-	-	-	-	-	Lipids and lipid-like molecules	Fatty Acyls	Fatty alcohols	-	30.8	-	-	1.854	1.8472	0.6748	0.03339	0.06283	3.5019	3.3259	2.5242	5.2346	3.978	4.6435
pos_1711	19(20)-EpDPE	metab_1704	yes	up	-	pos	-	362.267	6.61318	M+H, M+NH4	C22H32O3	-	54.9	HMDB0013620;LMFA04000038	-	-	-	-	-	Lipids and lipid-like molecules	Fatty Acyls	Lineolic acids and derivatives	-	54.9	-	-	1.2906	1.2904	1.1609	0.004759	0.01597	4.9247	4.6176	4.7021	4.1083	4.2033	3.959
pos_1732	Beta-D-Glucopyranosyl-11-hydroxyjasmonic acid	metab_1725	yes	up	-	pos	-	411.163	2.54483	M+Na, M+K	C18H28O9	-	48	HMDB0039964	-	-	-	-	-	Lipids and lipid-like molecules	Fatty Acyls	Fatty acyl glycosides	-	48	-	-	2.2654	2.2662	1.6139	3.97e-05	0.001077	4.9965	5.1083	5.0682	3.2297	2.9488	3.2222
pos_1737	Yucalexin P21	metab_1730	yes	up	-	pos	119626-54-9	322.274	6.85378	M+NH4, M+Na	C20H32O2	-	71.4	HMDB0036754	-	-	-	-	-	Lipids and lipid-like molecules	Prenol lipids	Diterpenoids	-	71.4	-	-	1.1868	1.186	1.1424	0.01148	0.02767	4.7837	4.4146	4.6379	3.9945	4.1798	3.9365
pos_1747	C17 Sphinganine	metab_1740	yes	up	-	pos	-	288.29	6.9634	M+H-H2O, M+H	C17H37NO2	42.8	-	LMSP01040003	-	-	-	-	-	-	-	-	42.8	-	-	-	1.9496	1.9503	1.4655	0.0001185	0.001971	4.3915	4.6456	4.4765	3.1787	2.9693	3.0745
pos_1816	Sterol	metab_1809	yes	down	C00370	pos	-	249.221	7.39763	M+H-H2O, M+H	C17H28O	34.2	-	HMDB0060512	-	-	-	-	-	Lipids and lipid-like molecules	Steroids and steroid derivatives	Hydroxysteroids	34.2	-	-	-	1.4687	1.4741	0.8172	0.01384	0.03193	4.0217	4.0236	3.9976	4.4864	5.1684	5.0807
pos_1871	3,5,5-Trimethyl-2-cyclopenten-1-one	metab_1864	yes	down	-	pos	24156-95-4	125.096	7.81157	M+H, M+ACN+H	C8H12O	62.2	-	HMDB0040246	-	-	-	-	-	Organic oxygen compounds	Organooxygen compounds	Carbonyl compounds	62.2	-	-	-	1.1535	1.1528	0.882	0.002804	0.01152	3.9066	3.8221	3.8845	4.3548	4.2797	4.5322
pos_1876	15(S)-Hydroxyeicosatrienoic acid	metab_1869	yes	up	-	pos	13-16-1	355.284	7.85582	M+H-H2O, M+CH3OH+H	C20H34O3	-	74.5	HMDB0005045	-	-	-	-	-	Lipids and lipid-like molecules	Fatty Acyls	Eicosanoids	-	74.5	-	-	1.2958	1.2959	1.1412	0.009397	0.02399	5.6797	5.6061	5.2279	4.8762	4.8474	4.7493
pos_1880	PA(20:5(5Z,8Z,11Z,14Z,17Z)/0:0)	metab_1873	yes	down	-	pos	-	457.232	7.8336	M+H, M+2Na-H	C23H37O7P	33.4	-	LMGP10050033	-	-	-	-	-	-	-	-	33.4	-	-	-	1.1511	1.1504	0.8844	0.001543	0.008079	3.9583	3.7722	3.979	4.4245	4.418	4.3956
pos_1886	Palmitic acid	metab_1879	yes	up	C00249	pos	1957-10-03	239.237	7.91952	M+H-H2O, M+H	C16H32O2	-	30.8	HMDB0303203;HMDB0000220;LMFA01010001;PW_C000145	Lipids	Fatty acids	map01100;map00071;map01212;map00073;map00061;map00062;map01040	Metabolism;Metabolism;Metabolism;Metabolism;Metabolism;Metabolism;Metabolism	Global and overview maps;Lipid metabolism;Global and overview maps;Lipid metabolism;Lipid metabolism;Lipid metabolism;Lipid metabolism	Lipids and lipid-like molecules	Fatty Acyls	Fatty acids and conjugates	-	30.8	Metabolic pathways;Fatty acid degradation;Fatty acid metabolism;Cutin, suberine and wax biosynthesis;Fatty acid biosynthesis;Fatty acid elongation;Biosynthesis of unsaturated fatty acids	Metabolic pathways;Fatty acid degradation;Fatty acid metabolism;Cutin, suberine and wax biosynthesis;Fatty acid biosynthesis;Fatty acid elongation;Biosynthesis of unsaturated fatty acids	1.3921	1.3925	1.2312	0.02602	0.05183	4.8377	4.4788	4.0217	3.6882	3.6348	3.5099
pos_1932	Palmitoyl glucuronide	metab_1925	yes	down	C03033	pos	-	441.282	8.39008	M+NH4, M+Na	C22H42O7	-	37.9	HMDB0010331	-	-	map01100;map00040;map00053;map01240	Metabolism;Metabolism;Metabolism;Metabolism	Global and overview maps;Carbohydrate metabolism;Carbohydrate metabolism;Global and overview maps	Lipids and lipid-like molecules	Fatty Acyls	Fatty acyl glycosides	-	37.9	Metabolic pathways;Pentose and glucuronate interconversions;Ascorbate and aldarate metabolism;Biosynthesis of cofactors	Metabolic pathways;Pentose and glucuronate interconversions;Ascorbate and aldarate metabolism;Biosynthesis of cofactors	1.3831	1.3845	0.7382	0.002537	0.01086	2.1035	2.121	2.0782	2.8185	3.049	2.671
pos_1937	13(S)-HODE methyl ester	metab_1930	yes	down	-	pos	-	311.258	8.30415	M+H-H2O, M+H	C19H34O3	66.5	-	-	-	-	-	-	-	-	-	-	66.5	-	-	-	1.2865	1.2842	0.842	0.005617	0.01789	3.4804	3.5989	3.3915	4.3451	4.1005	3.9903
pos_2004	Ethyltestosterone	metab_1997	yes	up	-	pos	1235-97-8	349.273	8.96722	M+CH3OH+H, 2M+K	C21H32O2	-	50.5	HMDB0006002;LMST02030201	-	-	-	-	-	Lipids and lipid-like molecules	Steroids and steroid derivatives	Pregnane steroids	-	50.5	-	-	1.4793	1.4834	1.2356	0.008514	0.02249	4.6903	4.6992	4.5801	4.1282	3.6082	3.5696
pos_2123	DGDG(16:0/18:2)	metab_2116	yes	up	-	pos	-	934.645	9.83962	M+NH4, M+Na	C49H88O15	72.9	-	-	-	-	-	-	-	-	-	-	72.9	-	-	-	1.1543	1.1529	1.1119	0.005945	0.01858	5.3383	5.354	5.073	4.6533	4.739	4.7864
pos_2126	GPCho(18:2/18:2)	metab_2119	yes	up	-	pos	998-06-1	782.568	9.8817	M+H, M+Na	C44H80NO8P	71.1	-	HMDB0008138;HMDB0011310;HMDB0013435;HMDB0011277	-	-	-	-	-	Lipids and lipid-like molecules	Glycerophospholipids	Glycerophosphocholines	71.1	-	-	-	1.4272	1.4265	1.1258	0.0001541	0.002213	6.8273	6.9006	6.8361	6.036	6.0412	6.1883
pos_2129	PC(14:0/18:2(9Z,12Z))	metab_2122	yes	up	C00157	pos	92345-33-0	730.537	9.86005	M+H, M+Na	C40H76NO8P	-	33.4	PW_C003924;HMDB0007874;LMGP01010496	Lipids	Phospholipids	map01100;map00564;map01110;map00590;map00591;map00592	Metabolism;Metabolism;Metabolism;Metabolism;Metabolism;Metabolism	Global and overview maps;Lipid metabolism;Global and overview maps;Lipid metabolism;Lipid metabolism;Lipid metabolism	Lipids and lipid-like molecules	Glycerophospholipids	Glycerophosphocholines	-	33.4	Metabolic pathways;Glycerophospholipid metabolism;Biosynthesis of secondary metabolites;Arachidonic acid metabolism;Linoleic acid metabolism;alpha-Linolenic acid metabolism	Metabolic pathways;Glycerophospholipid metabolism;Biosynthesis of secondary metabolites;Arachidonic acid metabolism;Linoleic acid metabolism;alpha-Linolenic acid metabolism	1.2831	1.2831	1.1264	0.0002521	0.002999	5.5083	5.5797	5.5123	4.9022	4.8391	4.994
pos_2135	Cer(d16:1(4E)/20:0(2OH))	metab_2128	yes	up	-	pos	-	582.545	10.097	M+H-H2O, M+H	C36H71NO4	43.2	-	LMSP02010084	-	-	-	-	-	-	-	-	43.2	-	-	-	1.6431	1.642	1.2621	0.0001716	0.002344	4.8604	5.0047	4.8129	3.8779	3.9593	3.7935
pos_2140	GPCho(17:1/17:1)	metab_2133	yes	up	-	pos	-	758.569	10.2922	M+H, M+Na	C42H80NO8P	50.8	-	-	-	-	-	-	-	-	-	-	50.8	-	-	-	1.4656	1.4643	1.1328	5.048e-05	0.001237	6.8401	6.8771	6.8544	5.9743	6.0674	6.1183
pos_2158	PE-NMe2(15:0/22:5(7Z,10Z,13Z,16Z,19Z))	metab_2151	yes	up	C04308	pos	-	780.552	9.67072	M+H, M+Na	C44H78NO8P	-	37.8	PW_C059952;HMDB0113936	-	-	map01100;map00564;map01110	Metabolism;Metabolism;Metabolism	Global and overview maps;Lipid metabolism;Global and overview maps	Lipids and lipid-like molecules	Glycerophospholipids	Glycerophosphoethanolamines	-	37.8	Metabolic pathways;Glycerophospholipid metabolism;Biosynthesis of secondary metabolites	Metabolic pathways;Glycerophospholipid metabolism;Biosynthesis of secondary metabolites	1.5181	1.5196	1.1864	0.001917	0.009173	5.6219	5.7626	5.6671	4.8652	4.5639	4.9442
pos_2409	4-Hydroxystachydrine	metab_2402	yes	down	C08269	pos	515-25-3	192.123	0.556333	M+CH3OH+H	C7H13NO3	-	50.1	HMDB0029412;HMDB0029230	-	-	-	-	-	Organic acids and derivatives	Carboxylic acids and derivatives	Amino acids, peptides, and analogues	-	50.1	-	-	1.3424	1.3436	0.8058	0.01256	0.02962	3.0464	3.1698	3.0081	3.8697	4.0719	3.5076
pos_2452	4-Pyrimidine Methanamine (hydrochloride)	metab_2445	yes	down	-	pos	-	110.072	0.61585	M+H	C5H7N3	54	-	-	-	-	-	-	-	-	-	-	54	-	-	-	1.2231	1.2213	0.8742	0.001849	0.008998	4.0113	3.8903	4.1068	4.629	4.4839	4.6239
pos_2519	Trigonelline	metab_2512	yes	up	C01004	pos	535-83-1	138.055	0.879233	M+H	C7H7NO2	60.6	-	HMDB0000875	-	-	map00760	Metabolism	Metabolism of cofactors and vitamins	Alkaloids and derivatives	Not Available	Not Available	60.6	-	Nicotinate and nicotinamide metabolism	Nicotinate and nicotinamide metabolism	1.3368	1.3372	1.1273	0.001018	0.006378	6.1155	5.9172	6.1702	5.3945	5.4139	5.342
pos_2672	Ser Val	metab_2665	yes	up	-	pos	-	205.118	1.4401	M+H	C8H16N2O4	61.9	-	-	-	-	-	-	-	-	-	-	61.9	-	-	-	1.0285	1.0286	1.103	0.0003148	0.003374	4.2503	4.3441	4.2576	3.9169	3.8723	3.8624
pos_2698	Cysteinyl-Threonine	metab_2691	yes	down	-	pos	-	205.064	1.54082	M+H-H2O	C7H14N2O4S	-	45.8	HMDB0028785	-	-	-	-	-	Organic acids and derivatives	Carboxylic acids and derivatives	Amino acids, peptides, and analogues	-	45.8	-	-	2.1617	2.1624	0.4369	0.01056	0.02613	2.0869	0.7528	1.5958	3.2298	3.6979	3.2208
pos_2705	3-Indolebutyric acid	metab_2698	yes	up	C11284	pos	133-32-4	221.128	1.56168	M+NH4	C12H13NO2	-	53.2	HMDB0002096	-	-	-	-	-	Organoheterocyclic compounds	Indoles and derivatives	Indoles	-	53.2	-	-	2.5344	2.5339	2.0716	0.0002281	0.00281	4.7309	4.6362	4.684	2.1142	2.0297	2.6381
pos_2775	Okanin	metab_2768	yes	down	C08724	pos	484-76-4	289.071	1.76857	M+H	C15H12O6	68.5	-	LMPK12120181;HMDB0245776	-	-	-	-	-	Phenylpropanoids and polyketides	Linear 1,3-diarylpropanoids	Chalcones and dihydrochalcones	68.5	-	-	-	1.082	1.0841	0.8912	0.01393	0.03207	4.0706	4.1042	3.7632	4.384	4.4886	4.5211
pos_2827	6-O-b-D-Fructofuranosyl-2-deoxy-D-glucose	metab_2820	yes	up	-	pos	57440-92-3	653.255	1.92117	2M+H	C12H22O10	-	31.3	HMDB0040154	-	-	-	-	-	Organic oxygen compounds	Organooxygen compounds	Carbohydrates and carbohydrate conjugates	-	31.3	-	-	2.1674	2.1658	1.6185	0.006428	0.01953	5.3552	4.2784	5.0556	2.7051	3.1955	3.174
pos_2828	5-Hydroxy-2-(1-hydroxy-5-methyl-4-hexenyl)benzofuran	metab_2821	yes	up	-	pos	197971-79-2	264.159	1.94112	M+NH4	C15H18O3	-	67.4	HMDB0031916	-	-	-	-	-	Organoheterocyclic compounds	Benzofurans	Not Available	-	67.4	-	-	3.3564	3.35	5.8318	0.001726	0.008686	5.223	5.3153	5.142	0.3252	2.053	0.3105
pos_2832	Cyanin	metab_2825	yes	up	C08639	pos	20905-74-2	611.161	1.94112	M+H	C27H30O16	47.3	-	HMDB0304306;LMPK12010113	-	-	map00942	Metabolism	Biosynthesis of other secondary metabolites	Phenylpropanoids and polyketides	Flavonoids	Flavonoid glycosides	47.3	-	Anthocyanin biosynthesis	Anthocyanin biosynthesis	2.4809	2.479	1.5728	3.151e-05	0.0009488	6.3519	6.2052	6.3976	3.8318	4.1385	4.0811
pos_2835	Adipoyl-CoA	metab_2828	yes	up	C14143	pos	25119-42-0	913.201	1.94112	M+NH4	C27H44N7O19P3S	-	40.5	LMFA07050284;HMDB0004047	-	-	map01100	Metabolism	Global and overview maps	Lipids and lipid-like molecules	Fatty Acyls	Fatty acyl thioesters	-	40.5	Metabolic pathways	Metabolic pathways	3.0278	3.0271	2.4147	0.0001399	0.002133	5.8713	5.751	6.0377	2.2272	2.1957	2.8914
pos_2842	Trans-Grandmarin	metab_2835	yes	up	-	pos	119239-48-4	648.205	1.96328	2M+ACN+Na	C15H16O6	-	43.1	HMDB0039030	-	-	-	-	-	Phenylpropanoids and polyketides	Coumarins and derivatives	Pyranocoumarins	-	43.1	-	-	1.7878	1.7896	1.4119	0.01468	0.03339	5.0695	3.9585	4.6073	3.2387	3.2071	3.2103
pos_2857	Polygonolide	metab_2850	yes	down	C09963	pos	100560-66-5	221.081	2.04663	M+H	C12H12O4	46.2	-	-	-	-	-	-	-	-	-	-	46.2	-	-	-	1.3507	1.3543	0.7668	0.02891	0.05612	2.9697	2.6208	2.2739	3.1712	3.6062	3.4769
pos_2868	Luteolin-7-O-glucoside	metab_2861	yes	up	-	pos	-	449.108	2.08933	M+H	C21H20O11	85	-	-	-	-	-	-	-	-	-	-	85	-	-	-	2.754	2.7537	1.5464	1.465e-07	4.158e-05	7.9918	7.9707	8.0413	5.2072	5.1978	5.1175
pos_2873	Caffeine	metab_2866	yes	down	C07481	pos	1958-08-02	195.088	2.13353	M+H	C8H10N4O2	90.5	-	HMDB0001847;PW_C001222	-	-	map01100;map01110;map00232	Metabolism;Metabolism;Metabolism	Global and overview maps;Global and overview maps;Biosynthesis of other secondary metabolites	Organoheterocyclic compounds	Imidazopyrimidines	Purines and purine derivatives	90.5	-	Metabolic pathways;Biosynthesis of secondary metabolites;Caffeine metabolism	Metabolic pathways;Biosynthesis of secondary metabolites;Caffeine metabolism	1.3675	1.3646	0.8098	0.005533	0.01772	3.302	3.0479	3.104	3.9815	3.6682	4.0223
pos_2874	6''-O-(3-Hydroxy-3-methylglutaroyl)astragalin	metab_2867	yes	up	-	pos	157407-84-6	625.175	2.15398	M+CH3OH+H	C27H28O15	-	72.8	HMDB0041129	-	-	-	-	-	Phenylpropanoids and polyketides	Flavonoids	Flavonoid glycosides	-	72.8	-	-	2.9495	2.9473	2.5822	3.008e-05	0.000924	5.3423	5.2062	5.3775	1.7733	2.1411	2.255
pos_2878	1-Methyl-1,3-cyclohexadiene	metab_2871	yes	down	-	pos	1489-56-1	95.086	2.19847	M+H	C7H10	-	30.2	HMDB0031532	-	-	-	-	-	Hydrocarbons	Unsaturated hydrocarbons	Branched unsaturated hydrocarbons	-	30.2	-	-	1.1039	1.1044	0.8824	0.0006926	0.00519	3.5541	3.4478	3.4435	3.8881	3.9483	4.0028
pos_2903	Hydroxyprolyl-Tyrosine	metab_2896	yes	up	-	pos	-	259.108	2.28422	M+H-2H2O	C14H18N2O5	-	45.6	HMDB0028875	-	-	-	-	-	Organic acids and derivatives	Carboxylic acids and derivatives	Amino acids, peptides, and analogues	-	45.6	-	-	2.012	2.0151	1.8553	0.002028	0.009488	3.2057	3.5462	3.4771	2.1221	1.4676	1.9244
pos_2917	Quercetin 3,7-dimethyl ether 5-glucoside	metab_2910	yes	up	-	pos	128388-46-5	493.134	2.32748	M+H	C23H24O12	56	-	HMDB0039336;LMPK12112710	-	-	-	-	-	Phenylpropanoids and polyketides	Flavonoids	Flavonoid glycosides	56	-	-	-	1.4855	1.4844	1.2195	0.003682	0.01364	5.0607	4.6367	4.7027	3.8297	3.9842	3.993
pos_2918	Stachyoside A	metab_2911	yes	down	-	pos	131862-10-7	571.163	2.32748	M+2Na-H	C21H34O15	-	73	HMDB0039092	-	-	-	-	-	Lipids and lipid-like molecules	Prenol lipids	Terpene glycosides	-	73	-	-	1.6122	1.6123	0.8302	4.889e-05	0.001214	4.8419	4.6818	4.7592	5.6868	5.7548	5.7645
pos_2922	Eugenitol	metab_2915	yes	up	-	pos	491-48-5	224.092	2.34803	M+NH4	C11H10O4	-	74.1	HMDB0029466	-	-	-	-	-	Organoheterocyclic compounds	Benzopyrans	1-benzopyrans	-	74.1	-	-	1.2611	1.2616	1.191	2.745e-05	0.000888	3.7581	3.6857	3.708	3.1536	3.0933	3.1175
pos_2925	Xanthotoxol glucoside	metab_2918	yes	up	-	pos	-	751.15	2.34803	2M+Na	C17H16O9	-	67.1	HMDB0038626	-	-	-	-	-	Phenylpropanoids and polyketides	Coumarins and derivatives	Coumarin glycosides	-	67.1	-	-	3.3704	3.3691	3.71	0.0003761	0.003704	5.8669	5.8698	5.9166	1.2132	1.1836	2.36
pos_2949	Estriol-16-Glucuronide	metab_2942	yes	up	C05504	pos	1852-50-2	482.238	2.43397	M+NH4	C24H32O9	-	56.7	HMDB0006766	-	-	-	-	-	Lipids and lipid-like molecules	Steroids and steroid derivatives	Steroidal glycosides	-	56.7	-	-	1.2844	1.2845	1.1247	0.0001072	0.001865	5.5235	5.6432	5.6039	5.0082	4.9623	4.9395
pos_2953	Pro Val Leu	metab_2946	yes	down	-	pos	-	328.223	2.45618	M+H	C16H29N3O4	79.1	-	-	-	-	-	-	-	-	-	-	79.1	-	-	-	1.8989	1.9	0.5888	0.001944	0.009215	1.8211	2.3813	1.796	3.3998	3.4405	3.3447
pos_2960	Val Val Ile	metab_2953	yes	down	-	pos	-	330.239	2.47772	M+H	C16H31N3O4	87.2	-	-	-	-	-	-	-	-	-	-	87.2	-	-	-	1.551	1.5525	0.7033	0.002352	0.01041	2.0953	2.483	2.07	3.102	3.1895	3.1626
pos_2984	Demethylsulochrin	metab_2977	yes	up	C15504	pos	-	319.081	2.58998	M+H	C16H14O7	59.1	-	-	-	-	-	-	-	-	-	-	59.1	-	-	-	2.5955	2.5945	1.8672	6.632e-06	0.0003778	5.4221	5.3748	5.4436	2.8824	3.0441	2.7717
pos_3005	Vanillylmandelic acid	metab_2998	yes	up	C05584	pos	13244-77-4;55-10-7	181.05	2.68013	M+H-H2O	C9H10O5	36.1	-	HMDB0304531;HMDB0000291;HMDB0254548;PW_C000197	-	-	map01100;map00350	Metabolism;Metabolism	Global and overview maps;Amino acid metabolism	Benzenoids	Phenols	Methoxyphenols	36.1	-	Metabolic pathways;Tyrosine metabolism	Metabolic pathways;Tyrosine metabolism	1.1673	1.1664	1.1276	0.0002655	0.003075	4.5749	4.5884	4.4647	3.9979	4.0359	4.0525
pos_3006	1,1'-(Tetrahydro-6a-hydroxy-2,3a,5-trimethylfuro[2,3-d]-1,3-dioxole-2,5-diyl)bis-ethanone	metab_2999	yes	up	-	pos	18114-49-3	241.107	2.68013	M+H-H2O	C12H18O6	-	79.9	HMDB0032527	-	-	-	-	-	Organic oxygen compounds	Organooxygen compounds	Ethers	-	79.9	-	-	1.694	1.6931	1.3249	3.64e-05	0.001032	4.4287	4.3905	4.3098	3.291	3.3777	3.2391
pos_3030	Blumealactone A	metab_3023	yes	up	-	pos	111545-46-1	428.205	2.74753	M+ACN+Na	C20H28O6	-	65	HMDB0036665	-	-	-	-	-	Lipids and lipid-like molecules	Prenol lipids	Monoterpenoids	-	65	-	-	1.8908	1.89	1.435	7.885e-05	0.001584	4.4586	4.5361	4.2764	3.0836	3.1273	3.0372
pos_3034	DL-3,4-Dihydroxymandelic acid	metab_3027	yes	up	-	pos	-	167.034	2.77025	M+H-H2O	C8H8O5	57.9	-	-	-	-	-	-	-	-	-	-	57.9	-	-	-	1.5513	1.5508	1.2724	9.644e-05	0.001794	4.2398	4.1244	4.3042	3.2851	3.3643	3.3084
pos_3037	His Ala Pro Met	metab_3030	yes	down	-	pos	-	455.208	2.77025	M+H	C19H30N6O5S	31.6	-	-	-	-	-	-	-	-	-	-	31.6	-	-	-	2.031	2.0251	0.6195	0.04538	0.07987	2.9232	3.6415	2.5292	5.3598	3.777	5.5429
pos_3077	Marmesin rutinoside	metab_3070	yes	up	-	pos	159650-11-0	555.206	2.88232	M+H	C26H34O13	-	62	HMDB0041413	-	-	-	-	-	Phenylpropanoids and polyketides	Coumarins and derivatives	Furanocoumarins	-	62	-	-	2.3324	2.328	1.7578	0.003015	0.01207	4.861	4.9695	4.8884	2.2201	2.7969	3.3549
pos_3173	Acteoside	metab_3166	yes	up	C10501	pos	61276-17-3	669.181	3.2	M+2Na-H	C29H36O15	-	49.8	HMDB0259785;HMDB0034843	-	-	-	-	-	Phenylpropanoids and polyketides	Cinnamic acids and derivatives	Hydroxycinnamic acids and derivatives	-	49.8	-	-	1.8286	1.8252	1.3005	0.0006564	0.005065	5.4814	5.5861	5.4076	3.9992	4.4164	4.2549
pos_3189	5-(3,4,5-trihydroxyphenyl)pentanoic acid	metab_3182	yes	up	-	pos	-	475.158	3.26842	2M+Na	C11H14O5	-	32.8	-	-	-	-	-	-	-	-	-	-	32.8	-	-	1.4953	1.495	1.2553	0.0001852	0.002446	4.1025	4.0886	4.2288	3.2496	3.2557	3.3876
pos_3202	Neobanone	metab_3195	yes	up	-	pos	-	383.112	3.3141	M+H	C21H18O7	34.5	-	LMPK12060036	-	-	-	-	-	-	-	-	34.5	-	-	-	1.1489	1.1476	1.1744	0.01042	0.02584	3.6878	3.6389	3.5043	3.0898	3.2466	2.8863
pos_3214	4',5,6-Trimethylscutellarein 7-glucoside	metab_3207	yes	up	-	pos	17680-85-2	473.142	3.33705	M+H-H2O	C24H26O11	-	46.1	HMDB0040512	-	-	-	-	-	Benzenoids	Anthracenes	Anthraquinones	-	46.1	-	-	1.2386	1.2378	1.1464	0.002037	0.009521	4.6082	4.5355	4.7893	3.9837	4.098	4.0728
pos_3218	Benzylmalic acid	metab_3211	yes	up	-	pos	-	225.076	3.36	M+H	C11H12O5	49.1	-	-	-	-	-	-	-	-	-	-	49.1	-	-	-	1.0541	1.0531	1.0978	0.000457	0.004128	4.7083	4.7058	4.7577	4.2409	4.3028	4.3661
pos_3275	Fluocinolone Acetonide	metab_3268	yes	up	-	pos	-	475.194	3.5649	M+Na	C24H30F2O6	-	62.9	-	-	-	-	-	-	-	-	-	-	62.9	-	-	1.4843	1.4846	1.2084	0.001109	0.006684	4.9304	5.0181	4.7315	4.0819	3.9426	4.1222
pos_3311	N-cis-Feruloyltyramine	metab_3304	yes	up	-	pos	80510-09-4	314.139	3.7017	M+H	C18H19NO4	42.9	-	HMDB0036381	-	-	-	-	-	Phenylpropanoids and polyketides	Cinnamic acids and derivatives	Hydroxycinnamic acids and derivatives	42.9	-	-	-	2.0232	2.0235	1.4702	0.0001232	0.002005	4.6433	4.8918	4.91	3.3801	3.2695	3.1751
pos_3444	Gladiatoside C2	metab_3437	yes	up	-	pos	-	549.137	4.47343	M+H-H2O	C29H26O12	-	36.6	HMDB0036254	-	-	-	-	-	Phenylpropanoids and polyketides	Flavonoids	Flavonoid glycosides	-	36.6	-	-	1.2759	1.2807	1.2952	0.01544	0.03468	3.0178	2.9266	3.0208	2.6375	2.1399	2.1431
pos_3492	4-Hydroxyderricin	metab_3485	yes	up	-	pos	-	339.159	4.8821	M+H	C21H22O4	32.1	-	LMPK12120041;HMDB0246454	-	-	-	-	-	Phenylpropanoids and polyketides	Linear 1,3-diarylpropanoids	Chalcones and dihydrochalcones	32.1	-	-	-	2.74	2.746	3.6679	0.003215	0.01254	4.1158	4.095	3.9489	2.0329	0.6402	0.6426
pos_3545	7-Oxo-11-dodecenoic acid	metab_3538	yes	down	-	pos	-	213.148	5.31835	M+H	C12H20O3	73.1	-	LMFA01060182	-	-	-	-	-	-	-	-	73.1	-	-	-	1.1014	1.1036	0.9035	0.01628	0.03608	4.8149	4.5903	4.8345	5.1358	5.4538	5.1733
pos_3748	Palmyrolide A	metab_3741	yes	up	-	pos	-	338.267	6.56863	M+H	C20H35NO3	55.1	-	-	-	-	-	-	-	-	-	-	55.1	-	-	-	1.0332	1.0336	1.0896	0.005802	0.01828	5.2699	5.0328	5.2064	4.7629	4.7947	4.6772
pos_3783	L-Palmitoylcarnitine	metab_3776	yes	down	C02990	pos	2364-67-2	364.321	6.76637	M+H-2H2O	C23H45NO4	-	72.2	LMFA07070079;HMDB0000222;PW_C000147;HMDB0240774;LMFA07070004	-	-	map01212;map00071	Metabolism;Metabolism	Global and overview maps;Lipid metabolism	Lipids and lipid-like molecules	Fatty Acyls	Fatty acid esters	-	72.2	Fatty acid metabolism;Fatty acid degradation	Fatty acid metabolism;Fatty acid degradation	1.6964	1.6948	0.6786	5.488e-05	0.001264	2.2866	2.2734	2.2613	3.4683	3.3032	3.2809
pos_3902	N-methylundec-10-enamide	metab_3895	yes	down	-	pos	-	198.185	7.37612	M+H	C12H23NO	30.2	-	-	-	-	-	-	-	-	-	-	30.2	-	-	-	1.1943	1.1938	0.8506	0.03229	0.06143	3.6632	3.4526	3.5582	4.3086	4.4211	3.8201
pos_3907	3-Caren-5-one	metab_3900	yes	down	-	pos	81800-50-2	151.112	7.39763	M+H	C10H14O	52.2	-	HMDB0035591	-	-	-	-	-	Lipids and lipid-like molecules	Prenol lipids	Monoterpenoids	52.2	-	-	-	1.314	1.3192	0.8388	0.01944	0.04128	3.871	3.7879	3.7961	4.1723	4.795	4.689
pos_4062	1-Monopalmitin	metab_4055	yes	up	-	pos	32899-41-5	331.284	8.24047	M+H	C19H38O4	98	-	HMDB0245964;HMDB0011564	-	-	-	-	-	Lipids and lipid-like molecules	Glycerolipids	Monoradylglycerols	98	-	-	-	1.3819	1.3819	1.1419	0.0005104	0.004368	5.9523	5.8361	5.7141	5.1331	5.1168	5.0772
pos_4078	Tauroursodeoxycholic acid	metab_4071	yes	up	C16868	pos	14605-22-2	541.335	8.34655	M+ACN+H	C26H45NO6S	-	65.5	LMST05040015;HMDB0000874	-	-	-	-	-	Lipids and lipid-like molecules	Steroids and steroid derivatives	Bile acids, alcohols and derivatives	-	65.5	-	-	1.4436	1.4436	1.1735	0.003207	0.01253	5.6479	5.6286	5.2617	4.7481	4.6979	4.6486
pos_4236	PE(16:0/P-18:1(11Z))	metab_4229	yes	down	-	pos	-	666.529	9.28592	M+H-2H2O	C39H76NO7P	-	33.2	HMDB0008951	-	-	-	-	-	Lipids and lipid-like molecules	Glycerophospholipids	Glycerophosphoethanolamines	-	33.2	-	-	1.0483	1.0489	0.9229	0.0003761	0.003704	5.0112	5.0192	4.9424	5.3992	5.4608	5.3628
pos_4881	PC(16:0/18:1(11Z))	metab_4874	yes	up	C00157	pos	-	760.584	10.7684	M+H	C42H82NO8P	-	71.4	PW_C004020;LMGP01010576;HMDB0007971	Lipids	Phospholipids	map01100;map00564;map01110;map00590;map00591;map00592	Metabolism;Metabolism;Metabolism;Metabolism;Metabolism;Metabolism	Global and overview maps;Lipid metabolism;Global and overview maps;Lipid metabolism;Lipid metabolism;Lipid metabolism	Lipids and lipid-like molecules	Glycerophospholipids	Glycerophosphocholines	-	71.4	Metabolic pathways;Glycerophospholipid metabolism;Biosynthesis of secondary metabolites;Arachidonic acid metabolism;Linoleic acid metabolism;alpha-Linolenic acid metabolism	Metabolic pathways;Glycerophospholipid metabolism;Biosynthesis of secondary metabolites;Arachidonic acid metabolism;Linoleic acid metabolism;alpha-Linolenic acid metabolism	1.7464	1.7436	1.2066	0.0004316	0.00401	6.7156	6.7209	6.7658	5.4024	5.7709	5.571
pos_4904	GPCho(18:1/18:2)	metab_4897	yes	up	-	pos	17041-44-0	806.566	10.2702	M+Na	C44H82NO8P	81.8	-	HMDB0008072;HMDB0011310;HMDB0011244;HMDB0013425;HMDB0013429;HMDB0008105	-	-	-	-	-	Lipids and lipid-like molecules	Glycerophospholipids	Glycerophosphocholines	81.8	-	-	-	1.594	1.5921	1.1776	0.0001466	0.002172	6.3404	6.2959	6.3441	5.2539	5.4813	5.3828
pos_4938	Cer(d16:2(4E,6E)/20:0(2OH))	metab_4931	yes	up	-	pos	-	580.53	9.92393	M+H	C36H69NO4	90.3	-	LMSP02010089	-	-	-	-	-	-	-	-	90.3	-	-	-	1.5552	1.5526	1.2136	0.0005859	0.00475	5.2488	5.2602	5.1043	4.1353	4.3916	4.3365
pos_5483	4,8,12,15,19-Docosapentaenoic acid	metab_5476	yes	down	-	pos	2548-85-8	348.287	8.09157	M+NH4	C22H34O2	-	36.9	HMDB0039133;LMFA01030183	-	-	-	-	-	Lipids and lipid-like molecules	Fatty Acyls	Fatty acids and conjugates	-	36.9	-	-	1.4583	1.4578	0.8226	0.01566	0.03506	4.2068	3.9957	4.09	5.1243	5.253	4.5674
pos_5511	Ascorbyl stearate	metab_5504	yes	down	-	pos	10605-09-1	460.327	7.98507	M+NH4	C24H42O7	-	34.2	HMDB0038242;LMFA07010789	-	-	-	-	-	Lipids and lipid-like molecules	Fatty Acyls	Fatty acid esters	-	34.2	-	-	1.2182	1.2209	0.8284	0.004025	0.01445	2.8408	2.8276	2.8154	3.2208	3.4789	3.5426
pos_5692	Hydroxyprolyl-Threonine	metab_5685	yes	down	-	pos	-	250.141	7.48398	M+NH4	C9H16N2O5	-	42.9	HMDB0028873	-	-	-	-	-	Organic acids and derivatives	Carboxylic acids and derivatives	Amino acids, peptides, and analogues	-	42.9	-	-	1.2023	1.1987	0.8612	0.01649	0.0364	3.8983	3.5333	3.7211	4.4419	4.1021	4.4066
pos_5749	(+/-)-(Z)-2-(5-Tetradecenyl)cyclobutanone	metab_5742	yes	up	-	pos	173074-85-6	306.279	7.3556	M+ACN+H	C18H32O	-	71	HMDB0037543	-	-	-	-	-	Organic oxygen compounds	Organooxygen compounds	Carbonyl compounds	-	71	-	-	1.4316	1.4321	1.1598	0.0001702	0.002342	5.6874	5.5762	5.5693	4.9042	4.8507	4.76
pos_5776	Sphinganine	metab_5769	yes	up	C00836	pos	764-22-7	302.305	7.2911	M+H	C18H39NO2	92	-	LMSP01020001;HMDB0242634;HMDB0000269;PW_C000184	-	-	map00600;map01100	Metabolism;Metabolism	Lipid metabolism;Global and overview maps	Organic nitrogen compounds	Organonitrogen compounds	Amines	92	-	Sphingolipid metabolism;Metabolic pathways	Sphingolipid metabolism;Metabolic pathways	1.1092	1.1098	1.0911	0.002427	0.01057	5.6369	5.8415	5.698	5.3178	5.2079	5.2156
pos_5975	Alpha-Linolenoyl Ethanolamide	metab_5968	yes	up	C13828	pos	-	322.274	6.61318	M+H	C20H35NO2	81	-	HMDB0013624	-	-	-	-	-	Organic nitrogen compounds	Organonitrogen compounds	Amines	81	-	-	-	1.2932	1.2915	1.1596	0.006088	0.01883	5.0142	4.6788	4.8022	4.0744	4.3229	4.1048
pos_6214	8,13-dihydroxy-9,11-octadecadienoic acid	metab_6207	yes	down	-	pos	-	313.237	5.76187	M+H	C18H32O4	83.7	-	LMFA02000166	-	-	-	-	-	-	-	-	83.7	-	-	-	1.4405	1.4414	0.8462	0.0007084	0.005235	4.4054	4.3074	4.3646	5.1112	5.3032	5.0379
pos_6245	(2Z,6E)-3,7,11,15,19-Pentamethyl-2,6-eicosadien-1-ol	metab_6238	yes	down	-	pos	26549-03-1	387.358	5.65583	M+Na	C25H48O	-	34.4	HMDB0035154	-	-	-	-	-	Lipids and lipid-like molecules	Prenol lipids	Sesterterpenoids	-	34.4	-	-	1.7707	1.766	0.7019	0.0184	0.03967	2.9637	2.6751	3.6139	4.7881	4.1956	4.1969
pos_6253	Herculin	metab_6246	yes	down	-	pos	-	269.259	5.63333	M+NH4	C16H29NO	-	61.6	LMFA08020180;HMDB0030275	-	-	-	-	-	Lipids and lipid-like molecules	Fatty Acyls	Fatty amides	-	61.6	-	-	2.4716	2.4683	0.4944	0.0003734	0.00369	2.1204	2.1073	2.539	4.8247	4.299	4.5645
pos_6363	Chavicol	metab_6355	yes	down	C16930	pos	501-92-8	117.07	5.31835	M+H-H2O	C9H10O	-	50.9	HMDB0034107	-	-	map00940	Metabolism	Biosynthesis of other secondary metabolites	Benzenoids	Phenols	1-hydroxy-2-unsubstituted benzenoids	-	50.9	Phenylpropanoid biosynthesis	Phenylpropanoid biosynthesis	1.0308	1.0324	0.8876	0.004431	0.01535	3.3384	3.2456	3.3595	3.6654	3.8619	3.677
pos_6421	3b,5a,6b-Cholestanetriol	metab_6413	yes	down	-	pos	1253-84-5	385.342	5.07925	M+H-2H2O	C27H48O3	-	45.2	HMDB0003990	-	-	-	-	-	Lipids and lipid-like molecules	Glycerophospholipids	Glycerophosphoethanolamines	-	45.2	-	-	1.9831	1.9779	0.638	0.004171	0.01483	2.7159	2.4736	2.9526	4.6965	4.0003	4.0643
pos_6471	9S,11R,15S-trihydroxy-2,3-dinor-13E-prostaenoic acid-cyclo[8S,12R]	metab_6462	yes	down	C14795	pos	-	329.232	4.9492	M+H	C18H32O5	48.6	-	LMFA03010154	-	-	map00590	Metabolism	Lipid metabolism	-	-	-	48.6	-	Arachidonic acid metabolism	Arachidonic acid metabolism	1.4476	1.443	0.7856	0.04588	0.08046	3.5598	3.3812	3.4653	4.9287	4.5101	3.8081
pos_6510	Palmitoylglycine	metab_6501	yes	down	-	pos	158305-64-7	331.295	4.76915	M+NH4	C18H35NO3	-	32.9	HMDB0013034	-	-	-	-	-	Organic acids and derivatives	Carboxylic acids and derivatives	Amino acids, peptides, and analogues	-	32.9	-	-	3.0041	3.0009	0.1597	0.003086	0.01227	1.7296	0.1398	0.1365	4.4811	4.056	4.02
pos_6523	Palmitoleoyl Ethanolamide	metab_6514	yes	down	-	pos	94421-67-7	315.3	4.72365	M+NH4	C18H35NO2	-	44	HMDB0013648	-	-	-	-	-	Organic nitrogen compounds	Organonitrogen compounds	Amines	-	44	-	-	2.2436	2.2398	0.5389	0.0008537	0.005833	2.2519	2.2387	2.2266	4.3988	3.7295	4.3359
pos_6577	Ax-4''-Hydroxy-3-'-methoxymaysin	metab_6568	yes	up	-	pos	169132-06-3	557.165	4.47343	M+H-2H2O	C28H32O14	-	62.3	HMDB0030238	-	-	-	-	-	Phenylpropanoids and polyketides	Flavonoids	Flavonoid glycosides	-	62.3	-	-	1.2068	1.2055	1.1157	0.004692	0.01587	5.4277	5.7251	5.4522	4.9089	4.9533	5.0211
pos_6602	Malvidin	metab_6593	yes	up	C08716	pos	643-84-5	331.081	4.40528	M+H	C17H14O7	76	-	LMPK12010004	-	-	-	-	-	-	-	-	76	-	-	-	1.3107	1.311	1.1415	0.005784	0.01826	5.6114	5.6415	5.2734	4.8987	4.8406	4.7372
pos_6618	Norfluoxetine	metab_6609	yes	up	-	pos	83891-03-6	337.154	4.33707	M+ACN+H	C16H16F3NO	-	38.8	PW_C040649;HMDB0060551	-	-	-	-	-	Benzenoids	Benzene and substituted derivatives	Trifluoromethylbenzenes	-	38.8	-	-	1.3713	1.3749	1.2122	0.007845	0.02233	4.3137	4.4176	4.3116	3.8873	3.4457	3.4292
pos_6636	Negletein 6-[rhamnosyl-(1->2)-fucoside]	metab_6627	yes	up	C10023	pos	192224-98-9	621.15	4.26888	M+2Na-H	C28H32O13	-	91.8	HMDB0031991	-	-	-	-	-	Organoheterocyclic compounds	Benzopyrans	1-benzopyrans	-	91.8	-	-	1.3135	1.3134	1.1773	0.0001711	0.002342	4.3322	4.3896	4.2295	3.6873	3.6557	3.6589
pos_6668	5,7-Dihydroxy-3-methoxyflavone	metab_6659	yes	up	C11577	pos	6665-74-3	317.102	4.15628	M+CH3OH+H	C16H12O5	-	30.1	HMDB0029522;LMPK12111654	-	-	-	-	-	Phenylpropanoids and polyketides	Flavonoids	O-methylated flavonoids	-	30.1	-	-	2.8157	2.8137	3.7458	0.002536	0.01086	4.1063	4.6322	3.8585	0.7377	0.7121	1.9134
pos_6689	Dorsteniol	metab_6680	yes	up	-	pos	80794-85-0	263.091	4.11113	M+H	C14H14O5	36.2	-	HMDB0032838	-	-	-	-	-	Phenylpropanoids and polyketides	Coumarins and derivatives	Furanocoumarins	36.2	-	-	-	1.1151	1.1168	1.1393	0.01315	0.03076	4.2343	4.3517	4.0031	3.8049	3.5882	3.6555
pos_6702	Linalool oxide D 3-[apiosyl-(1->6)-glucoside]	metab_6693	yes	down	-	pos	-	465.229	4.06587	M+H	C21H36O11	-	74.9	HMDB0031367	-	-	-	-	-	Organic oxygen compounds	Organooxygen compounds	Carbohydrates and carbohydrate conjugates	-	74.9	-	-	2.7413	2.7313	0.1446	0.02478	0.04993	1.4955	0.0653	0.0636	4.6068	2.1883	4.4325
pos_6749	Valechlorin	metab_6740	yes	down	-	pos	51771-49-4	491.207	3.9063	M+CH3OH+H	C22H31ClO8	-	60.4	HMDB0041045	-	-	-	-	-	Lipids and lipid-like molecules	Prenol lipids	Monoterpenoids	-	60.4	-	-	1.8737	1.8737	0.6937	0.002621	0.01111	3.1488	3.3499	2.7804	4.4219	4.2739	4.6799
pos_6770	Limocitrol 3-glucoside	metab_6761	yes	up	-	pos	77133-42-7	583.108	3.83782	M+2Na-H	C24H26O14	-	90.5	LMPK12113320;HMDB0037690	-	-	-	-	-	Phenylpropanoids and polyketides	Flavonoids	Flavonoid glycosides	-	90.5	-	-	2.9595	2.9592	2.4913	5.892e-07	9.873e-05	5.3935	5.4044	5.5696	2.2099	2.1785	2.1817
pos_6825	(+/-)-Naringenin	metab_6815	yes	up	-	pos	-	273.076	3.72447	M+H	C15H12O5	84.4	-	-	-	-	-	-	-	-	-	-	84.4	-	-	-	1.757	1.7576	1.3229	0.000128	0.002026	4.726	4.7406	4.8179	3.6142	3.4639	3.72
pos_6832	N-(p-Hydroxyphenyl)ethyl p-hydroxycinnamide	metab_6822	yes	up	-	pos	36417-86-4	284.128	3.7017	M+H	C17H17NO3	44.1	-	HMDB0039521	-	-	-	-	-	Phenylpropanoids and polyketides	Cinnamic acids and derivatives	Hydroxycinnamic acids and derivatives	44.1	-	-	-	1.8103	1.8142	1.346	0.002513	0.01082	5.0201	4.7477	5.1601	3.9524	3.4474	3.6909
pos_6875	Isoacoramone	metab_6865	yes	up	-	pos	3904-18-5	225.112	3.61055	M+H	C12H16O4	59	-	HMDB0040629	-	-	-	-	-	Organic oxygen compounds	Organooxygen compounds	Carbonyl compounds	59	-	-	-	1.6874	1.687	1.2707	9.966e-06	0.0004774	5.0188	5.0372	4.915	3.93	3.9186	3.9321
pos_6887	5'-(3'-methoxy-4'-hydroxyphenyl)-gamma-valerolactone	metab_6876	yes	up	-	pos	-	223.096	3.58777	M+H	C12H14O4	58.3	-	HMDB0029226	-	-	-	-	-	Benzenoids	Phenols	Methoxyphenols	58.3	-	-	-	2.1374	2.1369	1.4629	1.728e-06	0.0001677	5.4112	5.4206	5.3222	3.6921	3.7159	3.6348
pos_6931	Taraxacoside	metab_6920	yes	up	-	pos	98449-40-2	381.118	3.49672	M+H-H2O	C18H22O10	-	79.8	HMDB0030055	-	-	-	-	-	Organic oxygen compounds	Organooxygen compounds	Carbohydrates and carbohydrate conjugates	-	79.8	-	-	1.0647	1.061	1.0978	0.01188	0.02847	5.0668	5.2829	5.1729	4.5475	4.8283	4.7633
pos_6991	Isorhamnetin	metab_6979	yes	up	C10084	pos	480-19-3	317.065	3.40565	M+H	C16H12O7	84	-	HMDB0002655;LMPK12110002	-	-	-	-	-	Phenylpropanoids and polyketides	Flavonoids	Flavones	84	-	-	-	1.8853	1.8835	1.3365	4.434e-05	0.001164	5.2521	5.2843	5.3117	3.8183	4.017	4.0243
pos_7005	1'-Acetoxychavicol acetate	metab_6993	yes	up	C10426	pos	151986-17-3;52946-22-2	235.096	3.38282	M+H	C13H14O4	53.6	-	HMDB0041005;HMDB0041006	-	-	-	-	-	Benzenoids	Phenol esters	Not Available	53.6	-	-	-	1.3113	1.3109	1.1869	5.147e-05	0.001249	4.1443	4.0429	4.0803	3.4149	3.4404	3.4793
pos_7029	Phe Gly	metab_7017	yes	down	-	pos	-	223.108	3.33705	M+H	C11H14N2O3	53.1	-	-	-	-	-	-	-	-	-	-	53.1	-	-	-	1.2113	1.2126	0.7701	0.000634	0.004949	1.8887	1.8756	1.8636	2.3776	2.5501	2.379
pos_7064	Osmanthuside A	metab_7052	yes	down	-	pos	97457-19-7	429.152	3.26842	M+H-H2O	C23H26O9	-	56.6	HMDB0038748	-	-	-	-	-	Phenylpropanoids and polyketides	Cinnamic acids and derivatives	Hydroxycinnamic acids and derivatives	-	56.6	-	-	1.4552	1.4569	0.8417	0.0007196	0.005284	4.2674	4.2589	4.3772	4.9558	5.1972	5.1773
pos_7069	4-Hydroxy-2H-pyran-3-carboxaldehyde	metab_7057	yes	up	-	pos	26110-68-9	275.055	3.26842	2M+Na	C6H6O3	-	58.2	HMDB0031256	-	-	-	-	-	Organoheterocyclic compounds	Pyrans	Not Available	-	58.2	-	-	1.3179	1.3168	1.2169	0.0053	0.01722	4.0505	3.7988	3.7292	3.1611	3.3118	3.0428
pos_7084	Patulin	metab_7072	yes	up	C16748	pos	149-29-1	137.023	3.24553	M+H-H2O	C7H6O4	-	53.4	HMDB0034299	-	-	-	-	-	Organoheterocyclic compounds	Pyrans	Not Available	-	53.4	-	-	1.9475	1.9531	1.4443	0.00625	0.01918	4.8924	4.8977	5.0416	3.8863	2.904	3.4785
pos_7140	3,4-Methylenedioxybenzoic acid	metab_7128	yes	up	-	pos	94-53-1	167.034	3.15433	M+H	C8H6O4	56.6	-	HMDB0032613	-	-	-	-	-	Organoheterocyclic compounds	Benzodioxoles	Not Available	56.6	-	-	-	1.5487	1.548	1.2962	0.0001087	0.001873	3.9612	3.8481	4.0183	2.9785	3.0731	3.0739
pos_7153	Quercetin	metab_7141	yes	up	C00389	pos	117-39-5	303.05	3.13162	M+H	C15H10O7	64.5	-	LMPK12110004;HMDB0005794	-	-	map01100;map00941;map01110;map00944	Metabolism;Metabolism;Metabolism;Metabolism	Global and overview maps;Biosynthesis of other secondary metabolites;Global and overview maps;Biosynthesis of other secondary metabolites	Phenylpropanoids and polyketides	Flavonoids	Flavones	64.5	-	Metabolic pathways;Flavonoid biosynthesis;Biosynthesis of secondary metabolites;Flavone and flavonol biosynthesis	Metabolic pathways;Flavonoid biosynthesis;Biosynthesis of secondary metabolites;Flavone and flavonol biosynthesis	2.2213	2.2202	1.5094	3.364e-06	0.0002513	5.4187	5.4227	5.5141	3.5331	3.659	3.6434
pos_7190	Val Ile Leu	metab_7178	yes	down	-	pos	-	344.254	3.0869	M+H	C17H33N3O4	72.1	-	-	-	-	-	-	-	-	-	-	72.1	-	-	-	1.4418	1.4451	0.7556	0.004088	0.01461	2.4955	2.6851	2.4327	3.1288	3.4461	3.5024
pos_7268	L-beta-homoleucine	metab_7256	yes	up	-	pos	-	146.118	2.9726	M+H	C7H15NO2	33.4	-	-	-	-	-	-	-	-	-	-	33.4	-	-	-	1.3357	1.3356	1.2153	7.074e-05	0.001477	3.7459	3.7337	3.8492	3.1147	3.1274	3.0784
pos_7289	1,2-Disinapoylgentiobiose	metab_7277	yes	down	-	pos	-	777.221	2.92713	M+Na	C34H42O19	-	36.2	HMDB0030335	-	-	-	-	-	Phenylpropanoids and polyketides	Cinnamic acids and derivatives	Hydroxycinnamic acids and derivatives	-	36.2	-	-	1.1259	1.1272	0.9131	0.001939	0.009215	5.1397	5.1075	5.2288	5.539	5.6798	5.7312
pos_7292	3-(2,5-dihydroxy-4-methoxyphenyl)-3,4-dihydro-2H-1-benzopyran-4,6,7-triol	metab_7280	yes	up	-	pos	-	641.186	2.92713	2M+H	C16H16O7	-	77.8	-	-	-	-	-	-	-	-	-	-	77.8	-	-	3.0674	3.0742	4.367	0.002409	0.01053	4.7219	4.714	4.8443	1.9874	0.1333	1.1488
pos_7321	(Z)-3-Oxo-2-(2-pentenyl)-1-cyclopenteneacetic acid	metab_7309	yes	down	-	pos	120282-76-0	241.143	2.90442	M+CH3OH+H	C12H16O3	-	40.9	HMDB0030197	-	-	-	-	-	Organic oxygen compounds	Organooxygen compounds	Carbonyl compounds	-	40.9	-	-	1.0157	1.0159	0.9138	0.001092	0.006631	4.2359	4.1285	4.1989	4.5306	4.5698	4.6491
pos_7322	(R)-Bitalin A	metab_7310	yes	up	-	pos	35844-67-8	219.102	2.90442	M+H	C13H14O3	42.6	-	HMDB0040358	-	-	-	-	-	Benzenoids	Benzene and substituted derivatives	Acetophenones	42.6	-	-	-	1.3432	1.342	1.1953	0.0004865	0.004265	4.1206	4.1352	4.2883	3.4348	3.5667	3.4921
pos_7343	Isochinomin	metab_7331	yes	up	-	pos	83118-66-5	895.192	2.85963	2M+Na	C20H20O11	-	39.1	HMDB0041147	-	-	-	-	-	Organoheterocyclic compounds	Benzopyrans	1-benzopyrans	-	39.1	-	-	2.5281	2.5283	1.6392	6.929e-06	0.0003834	6.0584	6.0527	6.2595	3.7735	3.6578	3.7763
pos_7430	2,4-Dihydroxybenzoic acid	metab_7418	yes	up	C00230	pos	99-50-3;89-86-1	155.034	2.77025	M+H	C7H6O4	57.7	-	HMDB0029666;HMDB0001856	-	-	map01100;map01110	Metabolism;Metabolism	Global and overview maps;Global and overview maps	Benzenoids	Benzene and substituted derivatives	Benzoic acids and derivatives	57.7	-	Metabolic pathways;Biosynthesis of secondary metabolites	Metabolic pathways;Biosynthesis of secondary metabolites	2.1059	2.1035	1.6258	0.0001512	0.002202	4.3274	4.2397	4.4163	2.4732	2.8457	2.6668
pos_7434	Arg Lys Lys Phe	metab_7422	yes	down	-	pos	-	578.374	2.74753	M+H	C27H47N9O5	61.4	-	-	-	-	-	-	-	-	-	-	61.4	-	-	-	1.4006	1.4	0.7513	0.009271	0.02374	2.3088	2.164	2.7151	3.165	3.1448	3.2579
pos_7452	Cyanidin 3-(6''-acetylglucoside)	metab_7440	yes	up	-	pos	-	491.118	2.72525	M+H	C23H22O12	76.9	-	HMDB0301884;LMPK12010132	-	-	-	-	-	Phenylpropanoids and polyketides	Flavonoids	Flavonoid glycosides	76.9	-	-	-	3.1675	3.1673	3.694	7.576e-07	0.0001096	5.1605	4.9974	5.2339	1.4083	1.378	1.381
pos_7463	Orsellinic acid	metab_7451	yes	up	C01839	pos	-	169.05	2.72525	M+H	C8H8O4	88.4	-	LMPK13010001	-	-	-	-	-	-	-	-	88.4	-	-	-	1.3776	1.3773	1.2153	5.959e-05	0.00134	3.9633	3.9904	4.0893	3.2822	3.3023	3.3241
pos_7464	Asn Cys Lys Tyr	metab_7452	yes	down	-	pos	-	527.23	2.70265	M+H	C22H34N6O7S	57.3	-	-	-	-	-	-	-	-	-	-	57.3	-	-	-	2.2233	2.2206	0.6205	0.003635	0.01354	3.2532	3.4945	2.7385	5.3084	4.6464	5.3318
pos_7501	Eriodictyol 7-(6-galloylglucoside)	metab_7489	yes	up	-	pos	-	585.124	2.63507	M+H-H2O	C28H26O15	-	49.2	HMDB0039921	-	-	-	-	-	Phenylpropanoids and polyketides	Flavonoids	Flavonoid glycosides	-	49.2	-	-	3.4702	3.4769	6.7841	0.002061	0.009612	5.4401	5.5138	5.5143	2.1237	0.1514	0.1523
pos_7509	4,8-dihydroxy-2H-furo[2,3-h]chromen-2-one	metab_7497	yes	up	-	pos	-	219.029	2.63507	M+H	C11H6O5	-	53.7	-	-	-	-	-	-	-	-	-	-	53.7	-	-	1.8023	1.8029	1.4727	0.001118	0.006718	4.1588	3.6522	3.8264	2.6536	2.6221	2.6252
pos_7512	3,4,5-trihydroxy-6-{3-[(5-oxooxolan-2-yl)methyl]phenoxy}oxane-2-carboxylic acid	metab_7500	yes	up	-	pos	-	759.213	2.61247	2M+Na	C17H20O9	-	48.6	-	-	-	-	-	-	-	-	-	-	48.6	-	-	2.3653	2.3647	1.7202	3.708e-06	0.0002549	5.0102	4.931	5.0194	2.8394	2.8572	3.0019
pos_7515	Trans-Caffeic acid [apiosyl-(1->6)-glucosyl] ester	metab_7503	yes	up	-	pos	-	497.129	2.61247	M+Na	C20H26O13	-	63	HMDB0033694	-	-	-	-	-	Phenylpropanoids and polyketides	Cinnamic acids and derivatives	Hydroxycinnamic acids and derivatives	-	63	-	-	1.9039	1.904	1.4337	0.001129	0.006729	4.8939	4.3213	4.5689	3.1765	3.2305	3.2093
pos_7518	Dictyoquinazol C	metab_7506	yes	up	-	pos	-	381.081	2.61247	M+K	C18H18N2O5	-	58.6	HMDB0040442	-	-	-	-	-	Organoheterocyclic compounds	Diazanaphthalenes	Benzodiazines	-	58.6	-	-	1.8388	1.8368	1.4735	0.003306	0.01277	4.4263	3.8118	4.0844	2.5632	2.9204	2.8794
pos_7527	Malonyldaidzin	metab_7515	yes	up	C16191	pos	124590-31-4	503.116	2.58998	M+H	C24H22O12	42.4	-	HMDB0041263	-	-	-	-	-	Phenylpropanoids and polyketides	Coumarins and derivatives	Furanocoumarins	42.4	-	-	-	2.3186	2.3157	1.6509	0.0001853	0.002446	5.1675	5.0617	5.1487	2.8731	3.3817	3.0598
pos_7579	Val Glu Leu	metab_7567	yes	down	-	pos	-	360.213	2.5	M+H	C16H29N3O6	75.6	-	-	-	-	-	-	-	-	-	-	75.6	-	-	-	1.7203	1.7201	0.644	0.006623	0.01993	2.2375	1.7093	2.4669	3.2708	3.4037	3.284
pos_7602	Val Gly Phe	metab_7590	yes	down	-	pos	-	322.176	2.45618	M+H	C16H23N3O4	53.6	-	-	-	-	-	-	-	-	-	-	53.6	-	-	-	1.7715	1.7717	0.625	0.0009291	0.00606	2.2272	1.9461	1.8258	3.1897	3.321	3.0881
pos_7610	Kaempferol-3-O-alpha-L-arabinoside	metab_7598	yes	up	-	pos	-	419.097	2.43397	M+H	C20H18O10	97.5	-	-	-	-	-	-	-	-	-	-	97.5	-	-	-	3.071	3.0708	2.8023	0.0001259	0.002012	5.5076	5.5004	5.5368	2.188	2.2303	1.4851
pos_7617	3-Phenylpropyl acetate	metab_7605	yes	down	C17663	pos	122-72-5	179.107	2.43397	M+H	C11H14O2	59.5	-	HMDB0033386	-	-	-	-	-	Benzenoids	Benzene and substituted derivatives	Not Available	59.5	-	-	-	1.1256	1.1272	0.8866	0.002873	0.01165	3.9093	3.8174	3.9056	4.2395	4.4029	4.4759
pos_7639	Ala Val Leu	metab_7627	yes	down	-	pos	-	302.207	2.3692	M+H	C14H27N3O4	70	-	-	-	-	-	-	-	-	-	-	70	-	-	-	1.4621	1.4687	0.6641	0.03472	0.06467	1.6545	2.3553	1.6296	2.459	3.0514	2.9836
pos_7652	Tyr Pro His	metab_7640	yes	down	-	pos	-	416.192	2.34803	M+H	C20H25N5O5	37.9	-	-	-	-	-	-	-	-	-	-	37.9	-	-	-	2.3707	2.3701	0.468	0.0001852	0.002446	2.1493	1.8415	1.5997	3.9983	3.9672	3.9765
pos_7665	6-(3-hydroxybut-1-en-1-yl)-7-methoxy-2H-chromen-2-one	metab_7653	yes	up	-	pos	-	556.194	2.32748	2M+ACN+Na	C14H14O4	-	36.2	-	-	-	-	-	-	-	-	-	-	36.2	-	-	1.753	1.7526	1.3491	2.729e-05	0.000888	4.3866	4.4462	4.4996	3.2536	3.2511	3.3787
pos_7670	Myristoylglycine	metab_7658	yes	down	-	pos	-	303.264	2.32748	M+NH4	C16H31NO3	-	57.6	HMDB0013250	-	-	-	-	-	Organic acids and derivatives	Carboxylic acids and derivatives	Amino acids, peptides, and analogues	-	57.6	-	-	2.1879	2.1854	0.5617	0.004416	0.01532	2.943	2.1559	2.1391	4.34	3.9502	4.597
pos_7672	3-(5-Methyl-2-furyl)prop-2-enal	metab_7660	yes	up	-	pos	5555-90-8	137.06	2.32748	M+H	C8H8O2	-	39.7	HMDB0032400	-	-	-	-	-	Organoheterocyclic compounds	Heteroaromatic compounds	Not Available	-	39.7	-	-	1.2143	1.2124	1.1208	0.0006161	0.004863	5.1751	5.1505	5.2319	4.5261	4.6997	4.654
pos_7674	Diosmin	metab_7662	yes	up	C10039	pos	520-27-4	609.181	2.30553	M+H	C28H32O15	69.4	-	HMDB0029548	-	-	-	-	-	Phenylpropanoids and polyketides	Flavonoids	Flavonoid glycosides	69.4	-	-	-	2.436	2.4349	1.7041	9.221e-05	0.001776	5.4369	5.4452	5.2874	3.1998	3.3681	2.9201
pos_7675	(-)-Epigallocatechin 3-glucuronide	metab_7663	yes	up	-	pos	-	465.103	2.30553	M+H-H2O	C21H22O13	-	75.7	HMDB0041639	-	-	-	-	-	Phenylpropanoids and polyketides	Flavonoids	Flavonoid glycosides	-	75.7	-	-	2.4917	2.4924	2.0932	1.503e-05	0.000635	4.5549	4.2956	4.4878	2.2244	2.0715	2.0746
pos_7690	Genistin	metab_7678	yes	up	-	pos	529-59-9	433.113	2.28422	M+H	C21H20O10	80.5	-	LMPK12050166;HMDB0033988	-	-	-	-	-	Phenylpropanoids and polyketides	Isoflavonoids	Isoflavonoid O-glycosides	80.5	-	-	-	2.724	2.7278	2.0616	0.0005594	0.004622	5.4441	5.5155	5.516	3.1435	2.1688	2.6793
pos_7724	NESS 0327	metab_7712	yes	up	-	pos	-	489.1	2.21967	M+H	C24H23Cl3N4O	34.9	-	-	-	-	-	-	-	-	-	-	34.9	-	-	-	3.6913	3.6966	9.6765	0.0006638	0.005085	5.8164	5.7636	5.8272	1.6852	0.0566	0.057
pos_7725	3,4,5,2',4',6'-Hexahydroxychalcone 2'-glucoside	metab_7713	yes	up	-	pos	-	467.119	2.21967	M+H	C21H22O12	39.4	-	LMPK12120279	-	-	-	-	-	-	-	-	39.4	-	-	-	2.3115	2.3121	1.5833	3.189e-06	0.0002476	5.4057	5.3729	5.466	3.5069	3.3481	3.4037
pos_7726	Pro Ile Tyr	metab_7714	yes	down	-	pos	-	392.218	2.21967	M+H	C20H29N3O5	63.4	-	-	-	-	-	-	-	-	-	-	63.4	-	-	-	1.1202	1.1237	0.8087	0.01072	0.02641	2.1855	2.1723	2.1602	2.5288	2.9083	2.6253
pos_7729	DIHYDROROBINETIN	metab_7717	yes	up	-	pos	-	305.065	2.21967	M+H	C15H12O7	57.4	-	-	-	-	-	-	-	-	-	-	57.4	-	-	-	2.64	2.6377	1.7044	2.587e-05	0.0008634	6.3011	6.2589	6.3441	3.4714	3.8594	3.7616
pos_7743	5,7-octadienoic acid	metab_7731	yes	down	-	pos	-	141.091	2.19847	M+H	C8H12O2	39	-	LMFA01030442	-	-	-	-	-	-	-	-	39	-	-	-	1.0265	1.0274	0.9013	0.0006715	0.005102	3.6995	3.6363	3.6714	4.0006	4.0817	4.1307
pos_7764	Graveobioside B	metab_7752	yes	up	-	pos	33579-63-4	595.166	2.13353	M+H	C27H30O15	30.5	-	HMDB0037454	-	-	-	-	-	Phenylpropanoids and polyketides	Flavonoids	Flavonoid glycosides	30.5	-	-	-	1.4942	1.4936	1.1678	7.542e-05	0.001541	5.8482	5.8951	5.7314	4.9862	5.0091	4.9674
pos_7767	7,4',5'-Trihydroxy-5,2'-oxido-4-phenylcoumarin	metab_7755	yes	up	-	pos	-	285.039	2.13353	M+H	C15H8O6	59.4	-	LMPK12100060	-	-	-	-	-	-	-	-	59.4	-	-	-	3.4288	3.4296	10.3008	2.901e-06	0.0002301	4.8619	4.8276	4.8962	0.7004	0.3569	0.3587
pos_7770	Quercetin 3-(3-p-coumaroylglucoside)	metab_7758	yes	down	-	pos	76211-70-6	593.129	2.11117	M+H-H2O	C30H26O14	-	65.2	HMDB0037365	-	-	-	-	-	Phenylpropanoids and polyketides	Flavonoids	Flavonoid glycosides	-	65.2	-	-	2.738	2.7374	0.3993	0.0006989	0.005203	2.4404	1.8569	1.3979	4.7804	4.7488	4.7295
pos_7783	Cyanidin	metab_7771	yes	up	C05905	pos	13306-05-3;528-58-5	287.055	2.08933	M+H	C15H10O6	84.5	-	LMPK12010002;HMDB0244184;HMDB0002708	-	-	map01100;map00942;map00941;map01110	Metabolism;Metabolism;Metabolism;Metabolism	Global and overview maps;Biosynthesis of other secondary metabolites;Biosynthesis of other secondary metabolites;Global and overview maps	Organoheterocyclic compounds	Triazines	1,3,5-triazines	84.5	-	Metabolic pathways;Anthocyanin biosynthesis;Flavonoid biosynthesis;Biosynthesis of secondary metabolites	Metabolic pathways;Anthocyanin biosynthesis;Flavonoid biosynthesis;Biosynthesis of secondary metabolites	2.753	2.7525	1.6965	6.954e-08	3.42e-05	6.8754	6.8509	6.9163	4.0705	4.086	4.0129
pos_7804	Pro Gly Leu	metab_7791	yes	down	-	pos	-	286.176	2.04663	M+H	C13H23N3O4	57.1	-	-	-	-	-	-	-	-	-	-	57.1	-	-	-	1.799	1.7975	0.581	0.002111	0.009761	1.8308	1.4607	1.9121	3.1149	3.0746	2.7678
pos_7806	N17-Dimethylindole-3-carboxaldehyde	metab_7793	yes	up	-	pos	-	174.091	2.04663	M+H	C11H11NO	44.5	-	-	-	-	-	-	-	-	-	-	44.5	-	-	-	1.7537	1.7539	1.4333	0.0007406	0.005367	3.8452	4.0659	3.7282	2.7306	2.5622	2.8288
pos_7808	Cadabicine methyl ether	metab_7795	yes	down	-	pos	-	472.218	2.025	M+Na	C26H31N3O4	-	65.5	HMDB0039857	-	-	-	-	-	Phenylpropanoids and polyketides	Flavonoids	Flavonoid glycosides	-	65.5	-	-	1.4089	1.4102	0.821	0.02399	0.04873	3.8419	4.0708	3.8156	4.5319	4.5366	5.2131
pos_7809	Taraxinic acid glucosyl ester	metab_7796	yes	down	-	pos	75911-14-7	442.207	2.025	M+NH4	C21H28O9	-	43	HMDB0035249	-	-	-	-	-	Lipids and lipid-like molecules	Prenol lipids	Terpene lactones	-	43	-	-	1.1286	1.1347	0.8789	0.03842	0.07	4.1864	4.2882	4.0226	4.4313	5.0271	4.761
pos_7811	(1S,2R,4R,8S)-p-Menthane-2,8,9-triol 9-glucoside	metab_7798	yes	down	-	pos	378254-08-1	373.183	2.025	M+Na	C16H30O8	-	53.2	HMDB0039978	-	-	-	-	-	Lipids and lipid-like molecules	Prenol lipids	Terpene glycosides	-	53.2	-	-	1.0309	1.0335	0.8266	0.004579	0.01567	2.0195	2.0064	1.9943	2.3176	2.5665	2.4009
pos_7814	4-Hydroxy-benzenepropanedioate	metab_7801	yes	up	-	pos	-	197.044	2.025	M+H	C9H8O5	-	43.7	HMDB0059809	-	-	-	-	-	Benzenoids	Phenol esters	Not Available	-	43.7	-	-	1.7233	1.7222	1.3742	0.006246	0.01918	4.615	4.1194	4.2888	2.9351	3.0452	3.4952
pos_7838	Dihydrozeatin riboside	metab_7825	yes	up	C16447	pos	-	354.177	1.96328	M+H	C15H23N5O5	53.7	-	-	-	-	map01110;map00908	Metabolism;Metabolism	Global and overview maps;Metabolism of terpenoids and polyketides	-	-	-	53.7	-	Biosynthesis of secondary metabolites;Zeatin biosynthesis	Biosynthesis of secondary metabolites;Zeatin biosynthesis	2.4603	2.4602	3.1751	0.0002603	0.003056	3.7075	3.1985	3.1041	1.0688	1.04	1.0429
pos_7848	Isoorientin 2''-[feruloyl-(->6)-glucoside]	metab_7834	yes	up	-	pos	220948-75-4	751.185	1.94112	M+H-2H2O	C37H38O19	-	75.4	HMDB0032911	-	-	-	-	-	Lignans, neolignans and related compounds	Lignan glycosides	Not Available	-	75.4	-	-	3.0282	3.0279	2.9256	1.939e-07	4.335e-05	5.2687	5.1137	5.1965	1.7943	1.7633	1.7664
pos_7874	2-(2,4-dihydroxyphenyl)-2-oxoacetic acid	metab_7860	yes	up	-	pos	-	165.018	1.92117	M+H-H2O	C8H6O5	-	44.5	-	-	-	-	-	-	-	-	-	-	44.5	-	-	2.3126	2.3127	2.2557	1.088e-05	0.0005037	3.6923	3.4498	3.6316	1.612	1.5812	1.5843
pos_7899	Gravacridonetriol	metab_7885	yes	up	-	pos	59086-94-1	399.154	1.87857	M+ACN+H	C19H19NO6	-	81.5	HMDB0029330	-	-	-	-	-	Organoheterocyclic compounds	Quinolines and derivatives	Benzoquinolines	-	81.5	-	-	2.1627	2.1652	1.7902	0.0008047	0.005638	4.0012	4.0852	4.0717	2.4535	1.8747	2.4633
pos_7953	Flaviolin	metab_7939	yes	up	C18012	pos	479-05-0	207.029	1.83447	M+H	C10H6O5	63.5	-	-	-	-	-	-	-	-	-	-	63.5	-	-	-	1.5556	1.5557	1.3153	5.437e-06	0.0003399	3.812	3.7224	3.7773	2.8868	2.8552	2.8584
pos_7964	3'-Glucosyl-2',4',6'-trihydroxyacetophenone	metab_7950	yes	up	-	pos	88885-07-8	353.084	1.8122	M+Na	C14H18O9	-	37	HMDB0040621	-	-	-	-	-	Organic oxygen compounds	Organooxygen compounds	Carbohydrates and carbohydrate conjugates	-	37	-	-	1.9515	1.951	1.4872	1.929e-05	0.0007387	4.2673	4.4189	4.347	2.8987	2.8618	3.0012
pos_8033	2-Keto-glutaramic acid	metab_8018	yes	up	C00940	pos	18465-19-5	308.106	1.72755	2M+NH4	C5H7NO4	-	68	HMDB0001552	-	-	map01100;map00250	Metabolism;Metabolism	Global and overview maps;Amino acid metabolism	Organic acids and derivatives	Keto acids and derivatives	Short-chain keto acids and derivatives	-	68	Metabolic pathways;Alanine, aspartate and glutamate metabolism	Metabolic pathways;Alanine, aspartate and glutamate metabolism	1.1942	1.1981	1.1711	0.01128	0.02738	3.9927	4.0486	3.9899	3.6756	3.2381	3.3574
pos_8090	Glu Met	metab_8075	yes	down	-	pos	-	279.101	1.66558	M+H	C10H18N2O5S	44.6	-	-	-	-	-	-	-	-	-	-	44.6	-	-	-	1.4248	1.4246	0.7729	0.001128	0.006727	2.6315	2.7469	2.5663	3.5076	3.4978	3.2724
pos_8091	Val Pro Gly	metab_8076	yes	down	-	pos	-	272.16	1.66558	M+H	C12H21N3O4	62.7	-	-	-	-	-	-	-	-	-	-	62.7	-	-	-	1.2739	1.2762	0.8272	0.02256	0.0464	3.3529	3.6261	2.9708	3.9919	4.0629	3.9737
pos_8101	Ne,Ne dimethyllysine	metab_8086	yes	down	C05545	pos	-	157.134	1.66558	M+H-H2O	C8H18N2O2	-	30.6	HMDB0013287	-	-	map01100;map00310	Metabolism;Metabolism	Global and overview maps;Amino acid metabolism	Organic acids and derivatives	Carboxylic acids and derivatives	Amino acids, peptides, and analogues	-	30.6	Metabolic pathways;Lysine degradation	Metabolic pathways;Lysine degradation	1.2934	1.2974	0.8279	0.03897	0.07088	3.3605	3.8259	3.6513	4.2658	4.7639	4.0633
pos_8129	Valyl-Glutamine	metab_8114	yes	down	-	pos	42854-54-6	228.134	1.64665	M+H-H2O	C10H19N3O4	-	54.6	HMDB0029125	-	-	-	-	-	Organic acids and derivatives	Carboxylic acids and derivatives	Amino acids, peptides, and analogues	-	54.6	-	-	2.0971	2.0979	0.3875	0.002348	0.01041	1.5164	0.8439	0.8838	2.6909	3.0281	2.6503
pos_8130	2-(4-Methyl-5-thiazolyl)ethyl formate	metab_8115	yes	up	-	pos	90731-56-9	213.069	1.64665	M+ACN+H	C7H9NO2S	-	43.7	HMDB0032420	-	-	-	-	-	Organoheterocyclic compounds	Azoles	Thiazoles	-	43.7	-	-	2.0562	2.0554	1.4788	3.452e-05	0.001003	4.7802	5.0105	4.8665	3.2661	3.2626	3.382
pos_8172	5-Acetyl-2,3-dihydro-1H-pyrrolizine	metab_8157	yes	up	-	pos	55041-85-5	150.091	1.604	M+H	C9H11NO	-	30.5	HMDB0040051	-	-	-	-	-	Organoheterocyclic compounds	Pyrrolizines	Not Available	-	30.5	-	-	1.5412	1.5415	1.2586	0.0002743	0.003142	4.4131	4.411	4.2862	3.5587	3.5056	3.3527
pos_8338	Neolinustatin	metab_8323	yes	up	C08336	pos	72229-42-6	465.208	1.24843	M+ACN+H	C17H29NO11	-	72.1	HMDB0038482	-	-	-	-	-	Organic oxygen compounds	Organooxygen compounds	Carbohydrates and carbohydrate conjugates	-	72.1	-	-	1.6262	1.6301	1.3186	0.02102	0.04388	4.6094	4.9377	4.433	4.0341	3.4455	3.1219
pos_8355	1-(3-Methylbutanoyl)-6-apiosylglucose	metab_8340	yes	up	-	pos	467242-31-5	438.197	1.18488	M+ACN+H	C16H28O11	-	40.7	HMDB0039953	-	-	-	-	-	Lipids and lipid-like molecules	Fatty Acyls	Fatty acyl glycosides	-	40.7	-	-	2.9009	2.9078	2.7371	0.005828	0.01834	5.368	5.2554	5.2741	2.6476	0.6883	2.4723
pos_8503	Diacetone alcohol	metab_8487	yes	down	-	pos	123-42-2	134.118	0.900083	M+NH4	C6H12O2	-	31.6	HMDB0031511	-	-	-	-	-	Organic oxygen compounds	Organooxygen compounds	Carbonyl compounds	-	31.6	-	-	2.2504	2.249	0.5066	0.001052	0.006492	1.9456	1.8987	2.1233	4.1557	4.1309	3.4914
pos_8679	Oxolan-3-one	metab_8663	yes	down	-	pos	22929-52-8	87.0446	0.6338	M+H	C4H6O2	35.3	-	HMDB0002523	-	-	-	-	-	Organoheterocyclic compounds	Dihydrofurans	Furanones	35.3	-	-	-	1.7195	1.7182	0.8009	0.0001577	0.002228	4.5271	4.5413	4.349	5.6628	5.4881	5.6016
pos_8766	L-2-Amino-5-(methylthio)pentanoic acid	metab_8749	yes	down	C17213	pos	25148-30-5	164.074	0.556333	M+H	C6H13NO2S	-	53.2	HMDB0030406	-	-	map01210;map01110;map00966	Metabolism;Metabolism;Metabolism	Global and overview maps;Global and overview maps;Biosynthesis of other secondary metabolites	Organic acids and derivatives	Carboxylic acids and derivatives	Amino acids, peptides, and analogues	-	53.2	2-Oxocarboxylic acid metabolism;Biosynthesis of secondary metabolites;Glucosinolate biosynthesis	2-Oxocarboxylic acid metabolism;Biosynthesis of secondary metabolites;Glucosinolate biosynthesis	2.5732	2.5718	0.2248	0.0001844	0.002446	0.4379	0.7571	0.974	3.2592	3.0176	3.3707
pos_551	Cyclophosphamide	metab_8994	yes	up	C07888	pos	50-18-0;6055-19-2	261.03	0.51605	M+H-H2O, M+H	C7H15Cl2N2O2P	-	32.1	HMDB0014672;PW_C009028	-	-	-	-	-	Organic nitrogen compounds	Organonitrogen compounds	Nitrogen mustard compounds	-	32.1	-	-	1.4219	1.4243	1.1785	0.001848	0.008998	5.2582	5.1793	5.0894	4.5504	4.2212	4.4038
neg_5	9,10,13-TriHOME	metab_9010	yes	down	C14835	neg	29907-57-1	329.233	5.3095	M-H, M+Cl, 2M-H, M+Na-2H	C18H34O5	-	62.7	HMDB0004710	-	-	map00591	Metabolism	Lipid metabolism	Lipids and lipid-like molecules	Fatty Acyls	Fatty acids and conjugates	-	62.7	Linoleic acid metabolism	Linoleic acid metabolism	1.0339	1.0322	0.914	0.003527	0.009349	6.1194	5.9358	6.0944	6.5565	6.7635	6.5375
neg_11	Glucodistylin	metab_9016	yes	up	-	neg	27297-45-6	465.104	2.06765	M-H, 2M-H, M+Cl, M-H2O-H	C21H22O12	-	66.3	HMDB0041597	-	-	-	-	-	Phenylpropanoids and polyketides	Flavonoids	Flavonoid glycosides	-	66.3	-	-	2.1929	2.1928	1.4855	2.31e-07	2.244e-05	7.4597	7.4663	7.5168	5.0281	5.09	4.9901
neg_26	L-Glutamine	metab_9031	yes	down	C00064	neg	5959-95-5;56-85-9	145.061	0.602	M-H, M+FA-H, M-H2O-H	C5H10N2O3	55.6	-	HMDB0000641;HMDB0003423;PW_C000500	Peptides	Amino acids	map01100;map00630;map00220;map00230;map01240;map02010;map00910;map01230;map00240;map00250;map00970;map00750	Metabolism;Metabolism;Metabolism;Metabolism;Metabolism;Environmental Information Processing;Metabolism;Metabolism;Metabolism;Metabolism;Genetic Information Processing;Metabolism	Global and overview maps;Carbohydrate metabolism;Amino acid metabolism;Nucleotide metabolism;Global and overview maps;Membrane transport;Energy metabolism;Global and overview maps;Nucleotide metabolism;Amino acid metabolism;Translation;Metabolism of cofactors and vitamins	Organic acids and derivatives	Carboxylic acids and derivatives	Amino acids, peptides, and analogues	55.6	-	Metabolic pathways;Glyoxylate and dicarboxylate metabolism;Arginine biosynthesis;Purine metabolism;Biosynthesis of cofactors;ABC transporters;Nitrogen metabolism;Biosynthesis of amino acids;Pyrimidine metabolism;Alanine, aspartate and glutamate metabolism;Aminoacyl-tRNA biosynthesis;Vitamin B6 metabolism	Metabolic pathways;Glyoxylate and dicarboxylate metabolism;Arginine biosynthesis;Purine metabolism;Biosynthesis of cofactors;ABC transporters;Nitrogen metabolism;Biosynthesis of amino acids;Pyrimidine metabolism;Alanine, aspartate and glutamate metabolism;Aminoacyl-tRNA biosynthesis;Vitamin B6 metabolism	1.1892	1.1904	0.8583	0.0004099	0.002065	4.4626	4.4861	4.3555	5.1276	5.0993	5.2743
neg_45	D-(+)-Raffinose	metab_9049	yes	up	C00492	neg	512-69-6	539.139	0.945883	M+Cl, M+K-2H, 2M-H	C18H32O16	93.5	-	HMDB0003213	-	-	map01100;map02010;map00052	Metabolism;Environmental Information Processing;Metabolism	Global and overview maps;Membrane transport;Carbohydrate metabolism	Organic oxygen compounds	Organooxygen compounds	Carbohydrates and carbohydrate conjugates	93.5	-	Metabolic pathways;ABC transporters;Galactose metabolism	Metabolic pathways;ABC transporters;Galactose metabolism	1.1192	1.1192	1.1252	0.002311	0.00681	5.9314	6.0443	5.8983	5.4609	5.2482	5.1774
neg_50	Tyrosyl-Hydroxyproline	metab_9053	yes	down	-	neg	936346-34-8	293.115	2.2237	M-H, M+Na-2H, M-H2O-H	C14H18N2O5	-	70	HMDB0029106	-	-	-	-	-	Organic acids and derivatives	Carboxylic acids and derivatives	Amino acids, peptides, and analogues	-	70	-	-	1.0236	1.0251	0.8467	0.02575	0.04286	3.3816	3.6239	3.1969	4.2712	3.9148	3.8648
neg_51	Zingerone glucoside	metab_9054	yes	up	-	neg	64703-96-4	401.145	2.31362	M+Cl, M+FA-H, M-H	C17H24O8	-	34.5	HMDB0040558	-	-	-	-	-	Organic oxygen compounds	Organooxygen compounds	Carbohydrates and carbohydrate conjugates	-	34.5	-	-	1.4193	1.4194	1.3174	3.436e-06	9.52e-05	4.2486	4.227	4.3014	3.2107	3.2681	3.2215
neg_85	Glycerol 2-(9Z,12Z-octadecadienoate) 1-hexadecanoate 3-O-[alpha-D-galactopyranosyl-(1->6)-beta-D-galactopyranoside]	metab_9088	yes	up	-	neg	145033-48-3	961.611	9.86367	M-H, M+Cl, M+FA-H	C49H88O15	-	36.9	HMDB0041511	-	-	-	-	-	Lipids and lipid-like molecules	Glycerolipids	Glycosylglycerols	-	36.9	-	-	1.0703	1.0678	1.1493	0.005031	0.01225	4.8574	4.8198	4.5226	4.1197	4.0643	4.1692
neg_93	Gingerglycolipid A	metab_9096	yes	up	-	neg	145937-22-0	721.366	7.1724	M-H, M+Cl, M+FA-H	C33H56O14	-	85.1	HMDB0041093;LMGL04010019	-	-	-	-	-	Lipids and lipid-like molecules	Glycerolipids	Glycosylglycerols	-	85.1	-	-	1.1211	1.1192	1.2165	0.03177	0.05092	4.2244	4.3757	3.995	3.8193	3.1203	3.4131
neg_100	Chorismate	metab_9103	yes	up	C00251	neg	617-12-9	451.089	2.54185	M+Na-2H, 2M-H, M-H2O-H	C10H10O6	-	58.3	HMDB0012199	-	-	map01100;map01110;map01240;map00130;map00998;map01230;map00790;map00400	Metabolism;Metabolism;Metabolism;Metabolism;Metabolism;Metabolism;Metabolism;Metabolism	Global and overview maps;Global and overview maps;Global and overview maps;Metabolism of cofactors and vitamins;Biosynthesis of other secondary metabolites;Global and overview maps;Metabolism of cofactors and vitamins;Amino acid metabolism	Organic acids and derivatives	Carboxylic acids and derivatives	Dicarboxylic acids and derivatives	-	58.3	Metabolic pathways;Biosynthesis of secondary metabolites;Biosynthesis of cofactors;Ubiquinone and other terpenoid-quinone biosynthesis;Biosynthesis of various secondary metabolites - part 2;Biosynthesis of amino acids;Folate biosynthesis;Phenylalanine, tyrosine and tryptophan biosynthesis	Metabolic pathways;Biosynthesis of secondary metabolites;Biosynthesis of cofactors;Ubiquinone and other terpenoid-quinone biosynthesis;Biosynthesis of various secondary metabolites - part 2;Biosynthesis of amino acids;Folate biosynthesis;Phenylalanine, tyrosine and tryptophan biosynthesis	2.0887	2.088	1.8365	6.54e-06	0.000151	4.8045	4.9979	4.8258	2.5865	2.7162	2.6638
neg_101	L-glycyl-L-hydroxyproline	metab_9104	yes	down	-	neg	-	223.045	0.64105	M-H, M+FA-H, M+Cl	C7H12N2O4	-	61	-	-	-	-	-	-	-	-	-	-	61	-	-	1.1819	1.1838	0.832	0.006783	0.01533	3.8993	3.9521	3.514	4.6611	4.4829	4.5138
neg_104	Cymorcin monoglucoside	metab_9107	yes	up	-	neg	76859-62-6	327.145	2.65607	M-H, M+Cl, M+FA-H	C16H24O7	-	37	HMDB0029777	-	-	-	-	-	Organic oxygen compounds	Organooxygen compounds	Carbohydrates and carbohydrate conjugates	-	37	-	-	1.1021	1.1028	1.2061	0.008955	0.01905	3.8525	3.9234	3.9876	2.9855	3.4315	3.3356
neg_113	(+/-)-Taxifolin	metab_9116	yes	up	-	neg	149418-37-1	303.051	3.05855	M-H, M+Na-2H, M-H2O-H	C15H12O7	73.7	-	HMDB0040894	-	-	-	-	-	Phenylpropanoids and polyketides	Stilbenes	Not Available	73.7	-	-	-	1.5437	1.5431	1.2532	4.616e-05	0.0005222	6.113	5.9613	5.9987	4.7166	4.8479	4.8575
neg_135	Azaleatin 3-glucoside	metab_9137	yes	up	-	neg	-	477.104	1.63925	M-H, M+Cl, M-H2O-H	C22H22O12	-	62.6	LMPK12112542;HMDB0037360	-	-	-	-	-	Phenylpropanoids and polyketides	Flavonoids	Flavonoid glycosides	-	62.6	-	-	1.7596	1.7578	1.6943	0.0007931	0.003216	4.203	3.7872	3.7808	2.1563	2.2739	2.5184
neg_224	L-Histidine	metab_9226	yes	down	C00135	neg	71-00-1	154.061	0.5798	M-H2O-H, M-H	C6H9N3O2	91.6	-	PW_C000116;HMDB0000177	Peptides	Amino acids	map01100;map01110;map00340;map02010;map01230;map00970;map00410	Metabolism;Metabolism;Metabolism;Environmental Information Processing;Metabolism;Genetic Information Processing;Metabolism	Global and overview maps;Global and overview maps;Amino acid metabolism;Membrane transport;Global and overview maps;Translation;Metabolism of other amino acids	Organic acids and derivatives	Carboxylic acids and derivatives	Amino acids, peptides, and analogues	91.6	-	Metabolic pathways;Biosynthesis of secondary metabolites;Histidine metabolism;ABC transporters;Biosynthesis of amino acids;Aminoacyl-tRNA biosynthesis;beta-Alanine metabolism	Metabolic pathways;Biosynthesis of secondary metabolites;Histidine metabolism;ABC transporters;Biosynthesis of amino acids;Aminoacyl-tRNA biosynthesis;beta-Alanine metabolism	1.1288	1.1279	0.8571	0.003104	0.008486	4.0365	3.9118	4.2334	4.7555	4.6437	4.8152
neg_315	Thiomorpholine 3-carboxylate	metab_9317	yes	up	C03901	neg	20960-92-3	353.088	1.70663	M+FA-H, 2M+Hac-H	C5H9NO2S	-	32.8	HMDB0059611	-	-	-	-	-	Organic acids and derivatives	Carboxylic acids and derivatives	Amino acids, peptides, and analogues	-	32.8	-	-	1.5024	1.5018	1.3639	6.712e-05	0.0006518	4.4165	4.2232	4.3345	3.1744	3.1049	3.2329
neg_327	Gallic acid	metab_9329	yes	up	C01424	neg	149-91-7	169.013	1.75215	M-H2O-H, M-H	C7H6O5	35.6	-	HMDB0005807	-	-	-	-	-	Benzenoids	Benzene and substituted derivatives	Benzoic acids and derivatives	35.6	-	-	-	1.643	1.6425	1.3677	8.158e-05	0.0007306	5.3019	5.0459	5.0645	3.7755	3.7732	3.7195
neg_334	6-Caffeoylsucrose	metab_9336	yes	down	-	neg	-	503.141	1.77495	M-H, M+FA-H	C21H28O14	-	66.4	HMDB0035486	-	-	-	-	-	Organic oxygen compounds	Organooxygen compounds	Carbohydrates and carbohydrate conjugates	-	66.4	-	-	1.212	1.2131	0.8501	0.006583	0.01499	4.3213	4.8089	4.5006	5.3061	5.2661	5.4635
neg_377	1-(dimethylamino)-2-methyl-3,4-diphenylbutane-1,3-diol	metab_9379	yes	down	-	neg	-	344.183	1.95627	M+Na-2H, M+FA-H	C19H25NO2	-	34.2	-	-	-	-	-	-	-	-	-	-	34.2	-	-	1.0851	1.0845	0.7334	0.00072	0.002984	1.6951	1.6945	1.6638	2.1983	2.4172	2.2714
neg_418	Safflomin A	metab_9420	yes	up	-	neg	146087-19-6;78281-02-4	593.151	2.11192	M-H2O-H, M-H	C27H32O16	-	34.7	HMDB0040677;HMDB0030558	-	-	-	-	-	Phenylpropanoids and polyketides	Cinnamic acids and derivatives	Hydroxycinnamic acids and derivatives	-	34.7	-	-	1.2094	1.2089	1.1617	0.0001503	0.001065	5.3877	5.4798	5.3161	4.6691	4.6694	4.5945
neg_428	3-O-Feruloylquinic acid	metab_9430	yes	up	C02572	neg	62929-69-5	367.103	2.11192	M-H, M+Na-2H	C17H20O9	-	64.9	HMDB0030669	-	-	-	-	-	Organic oxygen compounds	Organooxygen compounds	Alcohols and polyols	-	64.9	-	-	1.0184	1.0192	1.1174	0.0009296	0.003563	5.1337	5.141	5.1962	4.5393	4.7304	4.5768
neg_430	2-(3,4,5-trihydroxyphenyl)-3,4-dihydro-2H-1-benzopyran-3,4,5,7-tetrol	metab_9432	yes	up	-	neg	-	303.051	2.24608	M-H2O-H, M+Na-2H	C15H14O8	-	52.2	-	-	-	-	-	-	-	-	-	-	52.2	-	-	1.5004	1.5	1.2844	0.0001998	0.001264	5.1897	5.2337	5.2511	3.8971	4.1266	4.1803
neg_444	Irilone 4'-glucoside	metab_9446	yes	up	-	neg	50868-47-8	441.083	2.31362	M-H2O-H, M+FA-H	C22H20O11	-	40.9	HMDB0033818	-	-	-	-	-	Phenylpropanoids and polyketides	Isoflavonoids	Isoflavonoid O-glycosides	-	40.9	-	-	1.2385	1.2389	1.1922	0.0001418	0.001036	4.8871	4.8469	4.9309	4.0251	4.1945	4.0819
neg_474	(-)-erythro-Anethole glycol 2-glucoside	metab_9476	yes	up	-	neg	217973-39-2	343.14	2.47328	M-H, M+Cl	C16H24O8	-	50.8	HMDB0033067	-	-	-	-	-	Organic oxygen compounds	Organooxygen compounds	Carbohydrates and carbohydrate conjugates	-	50.8	-	-	1.7369	1.7364	1.5252	4.512e-05	0.0005139	4.3829	4.5236	4.5185	2.8093	2.9557	3.0373
neg_500	Astilbin	metab_9502	yes	up	C17449	neg	29838-67-3	495.115	2.61043	M-H, M+FA-H	C21H22O11	-	66.3	HMDB0242667;HMDB0033850	-	-	-	-	-	Phenylpropanoids and polyketides	Flavonoids	Flavonoid glycosides	-	66.3	-	-	2.0398	2.0393	1.6929	0.0003459	0.001864	5.4288	5.0787	5.2204	2.7776	3.274	3.238
neg_523	2-O-Benzoyl-D-glucose	metab_9525	yes	up	-	neg	63029-01-6	329.088	2.74795	M+Na-2H, M+FA-H	C13H16O7	-	77.4	HMDB0034618	-	-	-	-	-	Organic oxygen compounds	Organooxygen compounds	Carbohydrates and carbohydrate conjugates	-	77.4	-	-	2.1106	2.1103	1.8869	0.0005046	0.002374	4.8428	4.8685	5.002	2.1623	2.7931	2.8413
neg_576	Gamma-delta-Dioxovaleric acid	metab_9578	yes	up	C02800	neg	-	151.003	3.0362	M+Na-2H, 2M+FA-H	C5H6O4	-	55.9	HMDB0013233	-	-	map00860	Metabolism	Metabolism of cofactors and vitamins	Organic acids and derivatives	Keto acids and derivatives	Gamma-keto acids and derivatives	-	55.9	Porphyrin and chlorophyll metabolism	Porphyrin and chlorophyll metabolism	1.9787	1.9786	1.7464	4.996e-06	0.0001247	4.7378	4.5999	4.6522	2.6481	2.7564	2.6053
neg_578	3,4,5-trihydroxy-6-[2-(2-hydroxybenzoyloxy)phenoxy]oxane-2-carboxylic acid	metab_9580	yes	up	-	neg	-	451.088	3.05855	M-H, M+FA-H	C19H18O10	-	58.3	-	-	-	-	-	-	-	-	-	-	58.3	-	-	2.5476	2.546	3.7838	0.005971	0.01397	4.6874	4.8802	4.7709	0.0015	1.5718	2.2157
neg_671	Trilobatin	metab_9673	yes	up	-	neg	4192-90-9	435.13	3.28508	M-H2O-H, M-H	C21H24O10	-	80.3	HMDB0037505;LMPK12120518	-	-	-	-	-	Phenylpropanoids and polyketides	Flavonoids	Flavonoid glycosides	-	80.3	-	-	1.2361	1.2347	1.1696	0.001667	0.005386	5.4735	5.5543	5.5479	4.7803	4.5233	4.8673
neg_676	5-(3',4',5'-Trihydroxyphenyl)-gamma-valerolactone-3'-O-glucuronide	metab_9678	yes	up	-	neg	-	437.052	3.1937	M+Na-2H, M+K-2H	C17H20O11	-	30.2	HMDB0059984	-	-	-	-	-	Organic oxygen compounds	Organooxygen compounds	Carbohydrates and carbohydrate conjugates	-	30.2	-	-	2.0864	2.0857	1.7244	0.0003796	0.001963	5.3166	5.3638	5.3654	2.6997	3.2642	3.3423
neg_723	2-(3,5-dihydroxyphenyl)-3,5,6,7-tetrahydroxy-3,4-dihydro-2H-1-benzopyran-4-one	metab_9725	yes	up	-	neg	-	319.046	2.77092	M-H, M+Na-2H	C15H12O8	-	78.8	-	-	-	-	-	-	-	-	-	-	78.8	-	-	2.6423	2.642	2.8543	1.148e-06	4.983e-05	5.4611	5.3688	5.5676	1.8253	1.9352	1.9849
neg_770	6-(4-ethyl-3-hydroxyphenoxy)-3,4,5-trihydroxyoxane-2-carboxylic acid	metab_9772	yes	down	-	neg	-	295.082	2.496	M-H2O-H, M-H	C14H18O8	-	84.4	-	-	-	-	-	-	-	-	-	-	84.4	-	-	1.2266	1.227	0.8118	0.003979	0.01025	3.5302	3.4814	3.432	4.0266	4.4553	4.3815
neg_771	Gentisein	metab_9773	yes	up	C10065	neg	529-49-7	289.036	2.47328	M+FA-H, 2M+FA-H	C13H8O5	-	64.1	HMDB0029463	-	-	-	-	-	Organoheterocyclic compounds	Benzopyrans	1-benzopyrans	-	64.1	-	-	2.4187	2.4184	2.8912	5.47e-08	1.253e-05	4.5281	4.5144	4.5933	1.6036	1.5604	1.5526
neg_874	3,5,6,7-tetrahydroxy-2-(4-hydroxy-3-methoxyphenyl)-8aH-chromen-8a-yl	metab_9875	yes	up	-	neg	-	299.056	2.2909	M-H2O-H, M-H	C16H14O7	-	60.9	-	-	-	-	-	-	-	-	-	-	60.9	-	-	2.203	2.2029	1.9813	1.503e-06	5.709e-05	4.9695	4.9845	5.0005	2.4522	2.6246	2.4712
neg_1094	Oxoadipic acid	metab_10095	yes	up	C00322	neg	3184-35-8	181.013	2.023	M+Na-2H, 3M-H	C6H8O5	-	48.5	PW_C000150;LMFA01170121;HMDB0000225	Organic acids	Carboxylic acids	map01100;map00310;map01110;map00300;map01240;map01210;map01230;map00380	Metabolism;Metabolism;Metabolism;Metabolism;Metabolism;Metabolism;Metabolism;Metabolism	Global and overview maps;Amino acid metabolism;Global and overview maps;Amino acid metabolism;Global and overview maps;Global and overview maps;Global and overview maps;Amino acid metabolism	Organic acids and derivatives	Keto acids and derivatives	Medium-chain keto acids and derivatives	-	48.5	Metabolic pathways;Lysine degradation;Biosynthesis of secondary metabolites;Lysine biosynthesis;Biosynthesis of cofactors;2-Oxocarboxylic acid metabolism;Biosynthesis of amino acids;Tryptophan metabolism	Metabolic pathways;Lysine degradation;Biosynthesis of secondary metabolites;Lysine biosynthesis;Biosynthesis of cofactors;2-Oxocarboxylic acid metabolism;Biosynthesis of amino acids;Tryptophan metabolism	1.925	1.9212	3.0805	0.01573	0.02875	3.1754	3.0137	3.1081	0.5085	0.4703	2.0404
neg_1111	Fluorocitric acid	metab_10112	yes	up	-	neg	-	190.998	1.93463	M-H2O-H, M-H	C6H7FO7	-	44	-	-	-	-	-	-	-	-	-	-	44	-	-	1.51	1.5105	1.4769	0.0003035	0.001692	3.7427	3.5611	3.6305	2.4213	2.6339	2.3497
neg_1618	3-(3-methylbut-2-en-1-yl)-4-(sulfooxy)benzoic acid	metab_10619	yes	up	-	neg	-	571.092	0.75995	2M-H	C12H14O6S	-	36.6	-	-	-	-	-	-	-	-	-	-	36.6	-	-	1.2248	1.2235	1.1996	0.0004783	0.002298	4.7872	4.6009	4.566	3.8872	3.8229	3.9197
neg_1646	Fluticasone 17beta-carboxylic acid	metab_10647	yes	down	-	neg	-	431.14	0.924583	M+Cl	C21H26F2O5	-	49.3	HMDB0061092	-	-	-	-	-	Lipids and lipid-like molecules	Steroids and steroid derivatives	Androstane steroids	-	49.3	-	-	1.1081	1.1116	0.8471	0.04712	0.071	4.5162	4.0566	4.2053	4.9916	4.6402	5.4509
neg_1791	Threoninyl-Cysteine	metab_10792	yes	down	-	neg	186761-52-4	203.049	1.52575	M-H2O-H	C7H14N2O4S	-	38.3	HMDB0029058	-	-	-	-	-	Organic acids and derivatives	Carboxylic acids and derivatives	Amino acids, peptides, and analogues	-	38.3	-	-	1.1068	1.105	0.6752	0.005358	0.01286	1.3822	1.3816	1.3517	2.0999	2.1973	1.7992
neg_1835	Guanosine-5'-monophosphate	metab_10836	yes	down	C00144	neg	85-32-5	362.051	1.61653	M-H	C10H14N5O8P	92.3	-	HMDB0001397	Nucleic acids	Nucleotides	map01100;map00230	Metabolism;Metabolism	Global and overview maps;Nucleotide metabolism	Nucleosides, nucleotides, and analogues	Purine nucleotides	Purine ribonucleotides	92.3	-	Metabolic pathways;Purine metabolism	Metabolic pathways;Purine metabolism	1.1014	1.1018	0.7404	0.009575	0.01981	1.7468	2.1934	1.8021	2.6165	2.6168	2.523
neg_1852	2,3,5-trihydroxy-6-(hydroxymethyl)oxan-4-yl 3,4,5-trihydroxybenzoate	metab_10853	yes	up	-	neg	-	331.067	1.63925	M-H	C13H16O10	-	64.6	-	-	-	-	-	-	-	-	-	-	64.6	-	-	1.1432	1.1447	1.178	0.005106	0.01239	4.7747	4.4406	4.8396	4.0119	4.0019	3.9179
neg_1871	N-Acetylcystathionine	metab_10872	yes	up	-	neg	20619-80-1	527.152	1.66145	2M-H	C9H16N2O5S	-	37.6	HMDB0002381	-	-	-	-	-	Organic acids and derivatives	Carboxylic acids and derivatives	Amino acids, peptides, and analogues	-	37.6	-	-	2.0098	2.0103	1.8976	1.252e-05	0.0002272	4.3091	4.3413	4.4133	2.2761	2.428	2.18
neg_1906	Glutamylmethionine	metab_10907	yes	down	-	neg	4423-22-7	277.086	1.72938	M-H	C10H18N2O5S	-	67.4	HMDB0028825	-	-	-	-	-	Organic acids and derivatives	Carboxylic acids and derivatives	Amino acids, peptides, and analogues	-	67.4	-	-	1.2125	1.2131	0.7636	0.0003687	0.001935	2.5254	2.5053	2.3238	3.2543	3.2048	3.175
neg_1994	N-Benzoylaspartic acid	metab_10994	yes	up	-	neg	4631-12-03	282.062	1.86652	M+FA-H	C11H11NO5	-	62.1	HMDB0034251	-	-	-	-	-	Organic acids and derivatives	Carboxylic acids and derivatives	Amino acids, peptides, and analogues	-	62.1	-	-	1.8931	1.892	1.6702	0.0001167	0.0009058	4.6358	4.5766	4.5072	2.5074	2.8165	2.8892
neg_2019	Cinnamtannin B2	metab_11019	yes	down	C17629	neg	88038-12-4	575.12	1.88938	M-2H	C60H48O24	-	34	HMDB0037668	-	-	-	-	-	Lipids and lipid-like molecules	Prenol lipids	Monoterpenoids	-	34	-	-	2.3554	2.3558	0.4728	1.165e-05	0.0002153	2.6487	2.6327	2.3265	5.3815	5.3357	5.3763
neg_2026	4,6,7-trihydroxy-2H-chromen-2-one	metab_11026	yes	up	-	neg	-	193.013	1.91197	M-H	C9H6O5	-	65.7	-	-	-	-	-	-	-	-	-	-	65.7	-	-	1.6545	1.6546	1.4278	1.415e-05	0.000247	4.6585	4.6184	4.6995	3.1756	3.3473	3.2664
neg_2031	Palatinose	metab_11031	yes	up	C01742	neg	13718-94-0	323.098	1.91197	M-H2O-H	C12H22O11	46.1	-	HMDB0256083	Carbohydrates	Oligosaccharides	-	-	-	Organic oxygen compounds	Organooxygen compounds	Carbohydrates and carbohydrate conjugates	46.1	-	-	-	1.3467	1.3466	1.2881	0.002596	0.007451	4.5132	4.0904	4.2982	3.1891	3.436	3.3914
neg_2049	Cinnamtannin A2	metab_11049	yes	down	C17625	neg	86631-38-1	576.127	1.93463	M-2H	C60H50O24	-	49.9	HMDB0037661	-	-	-	-	-	Phenylpropanoids and polyketides	Flavonoids	Biflavonoids and polyflavonoids	-	49.9	-	-	2.8358	2.8354	0.2053	1.986e-08	9.037e-06	1.0661	1.0656	1.0371	5.0987	5.131	5.1987
neg_2076	Asparaginyl-Phenylalanine	metab_11076	yes	down	-	neg	-	278.115	1.97887	M-H	C13H17N3O4	-	66.9	HMDB0028738	-	-	-	-	-	Organic acids and derivatives	Carboxylic acids and derivatives	Amino acids, peptides, and analogues	-	66.9	-	-	1.2016	1.2003	0.6879	0.03766	0.05859	1.654	2.3549	1.7679	2.7571	3.1418	2.5021
neg_2094	1,2,6,8-Tetrahydroxy-3-methylanthraquinone 2-O-b-D-glucoside	metab_11094	yes	up	-	neg	-	493.099	2.00155	M+FA-H	C21H20O11	-	55.2	HMDB0032903	-	-	-	-	-	Benzenoids	Anthracenes	Anthraquinones	-	55.2	-	-	2.0508	2.0517	1.8362	7.562e-05	0.0006992	4.6967	4.6962	4.8037	2.5759	2.793	2.3631
neg_2113	Cinnamtannin II	metab_11113	yes	down	C17626	neg	86631-39-2	720.159	2.023	M-2H	C75H62O30	-	54.4	HMDB0037659	-	-	-	-	-	Phenylpropanoids and polyketides	Flavonoids	Biflavonoids and polyflavonoids	-	54.4	-	-	2.9885	2.988	0.1312	2.432e-08	9.172e-06	0.6942	0.6937	0.6689	5.1589	5.2332	5.2799
neg_2116	3-O-p-Coumaroylquinic acid	metab_11116	yes	up	-	neg	-	337.093	2.04542	M-H	C16H18O8	-	69.2	HMDB0029681	-	-	-	-	-	Organic oxygen compounds	Organooxygen compounds	Alcohols and polyols	-	69.2	-	-	1.7402	1.7399	1.4559	6.324e-05	0.0006309	5.0113	4.8096	5.0195	3.3005	3.3989	3.4951
neg_2119	Kojic acid	metab_11119	yes	up	C14516	neg	501-30-4	163.003	2.06765	M+Na-2H	C6H6O4	-	36	HMDB0032923;HMDB0258034	-	-	-	-	-	Organoheterocyclic compounds	Pyrans	Pyranones and derivatives	-	36	-	-	1.9431	1.9431	1.7095	4.485e-07	2.956e-05	4.5808	4.6311	4.6663	2.7057	2.7407	2.6721
neg_2122	6-Hydroxyluteolin	metab_11122	yes	up	C10072	neg	18003-33-3	301.035	2.06765	M-H	C15H10O7	-	50.5	LMPK12111229;HMDB0036632	-	-	-	-	-	Phenylpropanoids and polyketides	Flavonoids	Flavones	-	50.5	-	-	2.4833	2.4836	2.4282	6.125e-05	0.0006197	5.3441	5.3507	5.3966	1.9414	2.5473	2.137
neg_2129	6-[(1Z)-2-hydroxy-3-oxobut-1-en-1-yl]-7-methoxy-2H-chromen-2-one	metab_11129	yes	up	-	neg	-	241.05	2.0893	M-H2O-H	C14H12O5	-	74.2	-	-	-	-	-	-	-	-	-	-	74.2	-	-	2.3861	2.3859	3.1144	1.129e-05	0.0002133	4.2416	4.2674	4.3105	1.5837	1.2644	1.2682
neg_2130	Luteolin	metab_11130	yes	up	C01514	neg	491-70-3	285.041	2.0893	M-H	C15H10O6	49.4	-	LMPK12110006;HMDB0005800	-	-	map01100;map00941;map01110;map00944	Metabolism;Metabolism;Metabolism;Metabolism	Global and overview maps;Biosynthesis of other secondary metabolites;Global and overview maps;Biosynthesis of other secondary metabolites	Phenylpropanoids and polyketides	Flavonoids	Flavones	49.4	-	Metabolic pathways;Flavonoid biosynthesis;Biosynthesis of secondary metabolites;Flavone and flavonol biosynthesis	Metabolic pathways;Flavonoid biosynthesis;Biosynthesis of secondary metabolites;Flavone and flavonol biosynthesis	2.4143	2.4143	2.1396	1.057e-05	0.000205	5.5486	5.5639	5.6205	2.4295	2.7969	2.5956
neg_2132	EMODIC ACID	metab_11132	yes	up	-	neg	-	299.02	2.0893	M-H	C15H8O7	39.8	-	-	-	-	-	-	-	-	-	-	39.8	-	-	-	2.5629	2.5625	3.0733	2.226e-08	9.037e-06	4.9241	4.9347	4.9859	1.6458	1.5907	1.5947
neg_2134	D-Erythroascorbic acid 1'-a-D-glucoside	metab_11134	yes	up	-	neg	174339-86-7	345.025	2.0893	M+K-2H	C11H16O10	-	70.3	HMDB0033627	-	-	-	-	-	Organic oxygen compounds	Organooxygen compounds	Carbohydrates and carbohydrate conjugates	-	70.3	-	-	2.1698	2.1694	2.609	1.334e-05	0.0002355	4.0466	3.7307	3.8917	1.5258	1.4711	1.475
neg_2169	A-L-Fucopyranosyl-(1->2)-b-D-galactopyranosyl-(1->2)-D-xylose	metab_11169	yes	up	-	neg	130136-27-5	495.115	2.1562	M+K-2H	C17H30O14	-	87.8	HMDB0041222	-	-	-	-	-	Organic oxygen compounds	Organooxygen compounds	Carbohydrates and carbohydrate conjugates	-	87.8	-	-	2.167	2.1648	2.2843	0.000492	0.002338	4.5856	4.1413	4.2182	1.7276	1.6722	2.2682
neg_2181	Gamma-Diosphenol	metab_11181	yes	down	-	neg	54783-36-7	213.113	2.20167	M+FA-H	C10H16O2	-	38.5	HMDB0037014	-	-	-	-	-	Lipids and lipid-like molecules	Prenol lipids	Monoterpenoids	-	38.5	-	-	2.0365	2.0367	0.453	1.062e-05	0.0002053	1.7528	1.7523	1.7483	3.7537	3.8278	4.0134
neg_2184	Jasmolone glucoside	metab_11184	yes	up	-	neg	-	387.166	2.20167	M+FA-H	C17H26O7	-	48.4	HMDB0032870	-	-	-	-	-	Organic oxygen compounds	Organooxygen compounds	Carbohydrates and carbohydrate conjugates	-	48.4	-	-	1.2211	1.2206	1.2801	0.001937	0.006024	3.6183	3.6869	3.4696	2.9748	2.7631	2.6808
neg_2203	D-1-Deoxy-erythro-hexo-2,3-diulose	metab_11203	yes	up	-	neg	-	183.029	2.24608	M+Na-2H	C6H10O5	-	65.2	HMDB0029934	-	-	-	-	-	Organic oxygen compounds	Organooxygen compounds	Carbohydrates and carbohydrate conjugates	-	65.2	-	-	1.7222	1.7221	1.5263	3.992e-06	0.0001059	4.4436	4.3178	4.3743	2.8451	2.9154	2.8461
neg_2236	Citrusin D	metab_11236	yes	up	-	neg	65995-51-9	341.124	2.33608	M-H	C16H22O8	-	67	HMDB0039334	-	-	-	-	-	Lipids and lipid-like molecules	Fatty Acyls	Fatty acyl glycosides	-	67	-	-	1.9461	1.9464	2.2102	0.0002738	0.001573	3.5215	3.6902	3.4829	1.4897	1.91	1.4391
neg_2293	Alloathyriol	metab_11293	yes	up	-	neg	67370-97-2	319.046	2.45027	M+FA-H	C14H10O6	-	77.6	HMDB0038715	-	-	-	-	-	Organoheterocyclic compounds	Benzopyrans	1-benzopyrans	-	77.6	-	-	2.5198	2.5203	2.6585	3.155e-05	0.0004058	5.2831	5.1243	5.1916	1.9584	2.2134	1.6974
neg_2303	Camelliaside B	metab_11303	yes	up	-	neg	131573-90-5	763.151	2.45027	M+K-2H	C32H38O19	-	69	HMDB0038767;LMPK12111750	-	-	-	-	-	Phenylpropanoids and polyketides	Flavonoids	Flavonoid glycosides	-	69	-	-	2.669	2.6693	2.8072	7.975e-05	0.0007209	5.6169	5.6692	5.7093	2.4483	1.8798	1.7247
neg_2306	5-Hydroxyvalproic acid	metab_11306	yes	up	C16650	neg	53660-23-4	181.086	2.47328	M+Na-2H	C8H16O3	-	42.4	PW_C008640;HMDB0013898	-	-	-	-	-	Lipids and lipid-like molecules	Fatty Acyls	Fatty acids and conjugates	-	42.4	-	-	1.5587	1.559	1.4857	4.461e-05	0.0005098	3.7033	3.8744	3.8186	2.5819	2.6124	2.4761
neg_2320	(-)-Shikimic acid	metab_11320	yes	up	C00493	neg	138-59-0	173.045	2.496	M-H	C7H10O5	65.7	-	HMDB0003070	-	-	map01100;map00400;map01110;map01230;map01240	Metabolism;Metabolism;Metabolism;Metabolism;Metabolism	Global and overview maps;Amino acid metabolism;Global and overview maps;Global and overview maps;Global and overview maps	Organic oxygen compounds	Organooxygen compounds	Alcohols and polyols	65.7	-	Metabolic pathways;Phenylalanine, tyrosine and tryptophan biosynthesis;Biosynthesis of secondary metabolites;Biosynthesis of amino acids;Biosynthesis of cofactors	Metabolic pathways;Phenylalanine, tyrosine and tryptophan biosynthesis;Biosynthesis of secondary metabolites;Biosynthesis of amino acids;Biosynthesis of cofactors	1.2421	1.2422	1.2602	0.0002325	0.001409	3.8878	3.7786	3.8726	2.9489	3.1266	3.0812
neg_2377	3,4,5-trihydroxy-6-(2-methoxybenzoyloxy)oxane-2-carboxylic acid	metab_11377	yes	up	-	neg	-	349.057	2.58732	M+Na-2H	C14H16O9	-	66.8	-	-	-	-	-	-	-	-	-	-	66.8	-	-	2.1374	2.1368	2.3875	3.979e-06	0.0001059	4.0246	3.9136	4.0597	1.6909	1.5817	1.7518
neg_2386	7-hydroxy-1-oxo-1H-isochromene-3-carboxylic acid	metab_11386	yes	up	-	neg	-	205.014	2.61043	M-H	C10H6O5	-	61.9	-	-	-	-	-	-	-	-	-	-	61.9	-	-	1.8006	1.8008	1.6323	1.803e-05	0.0002872	4.1814	4.3274	4.3012	2.5881	2.7175	2.5424
neg_2404	Cymorcin diglucoside	metab_11404	yes	up	-	neg	-	489.198	2.63327	M-H	C22H34O12	-	48.3	HMDB0039386	-	-	-	-	-	Organic oxygen compounds	Organooxygen compounds	Carbohydrates and carbohydrate conjugates	-	48.3	-	-	2.0489	2.0498	2.0376	6.642e-05	0.0006459	4.2011	4.1458	4.319	1.9853	2.2976	1.9334
neg_2484	2-Cinnamoyl-1,6-digalloyl-beta-D-glucopyranose	metab_11484	yes	up	-	neg	94356-17-9	635.105	2.77092	M+Na-2H	C29H26O15	-	42.1	HMDB0039192	-	-	-	-	-	Phenylpropanoids and polyketides	Tannins	Not Available	-	42.1	-	-	2.609	2.6083	2.9001	2.459e-06	7.842e-05	5.2993	5.2071	5.3454	1.9313	1.6715	1.8624
neg_2506	(S)-Multifidol 2-[apiosyl-(1->6)-glucoside]	metab_11506	yes	up	-	neg	467437-62-3	485.167	2.81658	M-H2O-H	C22H32O13	-	73	HMDB0039930	-	-	-	-	-	Organic oxygen compounds	Organooxygen compounds	Carbohydrates and carbohydrate conjugates	-	73	-	-	1.5533	1.553	1.4209	6.688e-06	0.0001535	4.1452	4.1211	4.1803	2.852	2.9347	2.9746
neg_2508	7-Hydroxy-2-methyl-4-oxo-4H-1-benzopyran-5-carboxylic acid	metab_11508	yes	up	-	neg	-	219.029	2.83958	M-H	C11H8O5	-	73.5	HMDB0036346	-	-	-	-	-	Organoheterocyclic compounds	Benzopyrans	1-benzopyrans	-	73.5	-	-	1.9967	1.9966	1.7461	0.0003449	0.00186	4.8071	4.8698	4.7662	2.4411	3.0605	2.7696
neg_2547	Tamarixetin	metab_11547	yes	up	C10188	neg	603-61-2	363.072	2.90813	M+FA-H	C16H14O7	-	54.5	LMPK12110606;HMDB0002937	-	-	-	-	-	Phenylpropanoids and polyketides	Flavonoids	O-methylated flavonoids	-	54.5	-	-	2.182	2.1821	2.7014	0.009273	0.01964	4.21	4.0778	4.2257	0.431	2.0966	2.1039
neg_2591	5-Hydroxyconiferyl alcohol	metab_11591	yes	up	C12205	neg	1782-47-4	391.14	2.9984	2M-H	C10H12O4	-	53.9	HMDB0060398	-	-	map00940;map01110	Metabolism;Metabolism	Biosynthesis of other secondary metabolites;Global and overview maps	Benzenoids	Phenols	Methoxyphenols	-	53.9	Phenylpropanoid biosynthesis;Biosynthesis of secondary metabolites	Phenylpropanoid biosynthesis;Biosynthesis of secondary metabolites	1.2501	1.252	1.303	0.01374	0.02586	3.6662	3.6104	4.102	2.6284	3.0366	3.0678
neg_2654	Quercetin-3-glucoside	metab_11654	yes	up	C05623	neg	482-35-9	463.089	3.1481	M-H	C21H20O12	97.1	-	HMDB0037362;HMDB0247252	-	-	map01100;map01110;map00944	Metabolism;Metabolism;Metabolism	Global and overview maps;Global and overview maps;Biosynthesis of other secondary metabolites	Phenylpropanoids and polyketides	Flavonoids	Flavonoid glycosides	97.1	-	Metabolic pathways;Biosynthesis of secondary metabolites;Flavone and flavonol biosynthesis	Metabolic pathways;Biosynthesis of secondary metabolites;Flavone and flavonol biosynthesis	2.2776	2.2776	1.8218	4.466e-07	2.956e-05	5.8009	5.8356	5.9083	3.2034	3.2653	3.1621
neg_2719	5,7-Dihydroxy-4'-methoxy-8-methylisoflavanone	metab_11719	yes	up	-	neg	163021-16-7	345.098	3.28508	M+FA-H	C17H16O5	-	43.4	HMDB0041322	-	-	-	-	-	Phenylpropanoids and polyketides	Isoflavonoids	O-methylated isoflavonoids	-	43.4	-	-	1.2196	1.2188	1.245	0.0002035	0.00128	3.8514	3.9249	3.8721	3.0227	3.1222	3.2119
neg_2759	3,8-Dihydroxy-9-methoxycoumestan	metab_11759	yes	up	-	neg	-	343.046	3.37632	M+FA-H	C16H10O6	-	79.5	HMDB0030562	-	-	-	-	-	Phenylpropanoids and polyketides	Isoflavonoids	Coumestans	-	79.5	-	-	2.4569	2.4569	3.1818	0.002249	0.006683	4.5483	4.7527	4.6636	0.5731	2.074	1.7426
neg_2768	6,7-Dihydroxycoumarin	metab_11768	yes	up	C09263	neg	305-01-1	177.018	3.39918	M-H	C9H6O4	57.7	-	HMDB0030819	-	-	-	-	-	Phenylpropanoids and polyketides	Coumarins and derivatives	Hydroxycoumarins	57.7	-	-	-	1.1148	1.113	1.1734	0.004228	0.01073	4.5968	4.5479	4.3526	3.9826	3.6865	3.833
neg_2821	6-(1-benzofuran-4-yloxy)-3,4,5-trihydroxyoxane-2-carboxylic acid	metab_11821	yes	up	-	neg	-	331.046	3.51303	M+Na-2H	C14H14O8	-	82	-	-	-	-	-	-	-	-	-	-	82	-	-	2.1254	2.1239	1.9495	0.000111	0.000881	4.9418	4.5863	4.7142	2.3659	2.285	2.6538
neg_2822	4-Methoxybenzyl O-(2-sulfoglucoside)	metab_11822	yes	up	-	neg	-	361.057	3.51303	M-H2O-H	C14H20O10S	-	61.6	HMDB0034754	-	-	-	-	-	Organic oxygen compounds	Organooxygen compounds	Carbohydrates and carbohydrate conjugates	-	61.6	-	-	1.8828	1.8833	1.9762	0.002886	0.008067	3.9448	3.6971	3.8047	2.4924	1.6477	1.6517
neg_2826	Eriodictyol-7-O-glucoside	metab_11826	yes	up	-	neg	38965-51-4	449.11	3.51303	M-H	C21H22O11	92.9	-	HMDB0029544	-	-	-	-	-	Benzenoids	Benzene and substituted derivatives	Benzoic acids and derivatives	92.9	-	-	-	1.8548	1.8553	1.6998	0.001242	0.004377	4.3806	4.4447	4.3045	2.2752	2.9984	2.4515
neg_2864	3-(6-hydroxy-7-methoxy-2H-1,3-benzodioxol-5-yl)prop-2-enoic acid	metab_11864	yes	up	-	neg	-	259.025	3.60422	M+Na-2H	C11H10O6	-	41.1	-	-	-	-	-	-	-	-	-	-	41.1	-	-	1.6855	1.6858	1.3674	4.789e-05	0.0005272	5.2938	5.4116	5.5181	3.8748	4.0202	3.9706
neg_2872	3-Dehydroquinate	metab_11872	yes	up	C00944	neg	10534-44-8	211.024	3.62702	M+Na-2H	C7H10O6	-	69.6	HMDB0012710	-	-	map01100;map00400;map01110;map01230	Metabolism;Metabolism;Metabolism;Metabolism	Global and overview maps;Amino acid metabolism;Global and overview maps;Global and overview maps	Organic acids and derivatives	Hydroxy acids and derivatives	Alpha hydroxy acids and derivatives	-	69.6	Metabolic pathways;Phenylalanine, tyrosine and tryptophan biosynthesis;Biosynthesis of secondary metabolites;Biosynthesis of amino acids	Metabolic pathways;Phenylalanine, tyrosine and tryptophan biosynthesis;Biosynthesis of secondary metabolites;Biosynthesis of amino acids	1.6882	1.6876	1.4374	8.166e-06	0.0001757	4.8504	4.712	4.7418	3.2668	3.3287	3.356
neg_2900	METHYL 7-DESHYDROXYPYROGALLIN-4-CARBOXYLATE	metab_11900	yes	up	-	neg	-	261.04	3.69532	M-H	C13H10O6	53.2	-	-	-	-	-	-	-	-	-	-	53.2	-	-	-	2.1026	2.1015	2.4804	8.62e-05	0.0007559	4.0616	3.6769	3.6305	1.5901	1.4949	1.4988
neg_2916	Apiosylglucosyl 4-hydroxybenzoate	metab_11916	yes	up	-	neg	223261-31-2	469.078	3.71818	M+K-2H	C18H24O12	-	56.8	HMDB0035318	-	-	-	-	-	Organic oxygen compounds	Organooxygen compounds	Carbohydrates and carbohydrate conjugates	-	56.8	-	-	2.3179	2.3198	2.4484	0.003582	0.009465	4.7609	4.9298	4.8882	2.8815	1.7566	1.3164
neg_2978	Epigallocatechin gallate	metab_11978	yes	up	C09731	neg	989-51-5	439.067	3.90032	M-H2O-H	C22H18O11	-	57.9	HMDB0003153	-	-	-	-	-	Phenylpropanoids and polyketides	Flavonoids	Flavans	-	57.9	-	-	2.253	2.2524	2.237	0.0002905	0.001645	4.7367	4.8041	4.6471	1.7042	2.4367	2.2021
neg_3067	HIERACIN	metab_12067	yes	up	-	neg	-	301.035	4.17323	M-H	C15H10O7	62.5	-	-	-	-	-	-	-	-	-	-	62.5	-	-	-	2.2395	2.2393	1.7767	1.057e-05	0.000205	5.6767	5.8898	5.9734	3.249	3.2754	3.3493
neg_3089	Syringaldehyde	metab_12089	yes	up	-	neg	-	181.05	4.24142	M-H	C9H10O4	66	-	HMDB0258653	-	-	-	-	-	Benzenoids	Phenols	Methoxyphenols	66	-	-	-	1.1355	1.1338	1.2024	0.01704	0.03065	4.3668	4.5891	4.105	3.8642	3.4684	3.5313
neg_3125	2-(3,5-dihydroxyphenyl)-3,5,6,7-tetrahydroxy-4H-chromen-4-one	metab_12125	yes	up	-	neg	-	299.02	4.37797	M-H2O-H	C15H10O8	-	45.9	-	-	-	-	-	-	-	-	-	-	45.9	-	-	1.8238	1.8234	1.5185	0.0002987	0.001679	4.9464	5.0165	5.0891	3.0294	3.3935	3.4876
neg_3130	Phenylalanyl-Valine	metab_12130	yes	down	-	neg	3918-90-9	527.286	4.40073	2M-H	C14H20N2O3	-	58.4	HMDB0029008	-	-	-	-	-	Organic acids and derivatives	Carboxylic acids and derivatives	Amino acids, peptides, and analogues	-	58.4	-	-	1.001	1.0027	0.8659	0.02091	0.03612	3.7083	3.8868	3.6391	4.0479	4.4605	4.4665
neg_3137	Theaflavic acid	metab_12137	yes	up	-	neg	30407-93-3	449.052	4.42352	M+Na-2H	C21H16O10	-	48.6	HMDB0040609	-	-	-	-	-	Phenylpropanoids and polyketides	Flavonoids	Flavans	-	48.6	-	-	2.331	2.3323	2.3625	0.001454	0.004898	4.8563	5.0204	4.9639	2.7859	1.9353	1.5614
neg_3196	4-Hydroxy-5-(3'-hydroxyphenyl)-valeric acid-3'-O-sulphate	metab_12196	yes	up	-	neg	-	311.02	4.71948	M+Na-2H	C11H14O7S	-	45.2	HMDB0059975	-	-	-	-	-	Lipids and lipid-like molecules	Fatty Acyls	Fatty acids and conjugates	-	45.2	-	-	1.8745	1.8741	1.582	0.0002726	0.001572	4.8908	4.9111	4.9495	2.8093	3.2649	3.2488
neg_3202	Sulfasalazine	metab_12202	yes	up	C07316	neg	599-79-1	419.041	4.74223	M+Na-2H	C18H14N4O5S	-	71.8	HMDB0014933	-	-	-	-	-	Organoheterocyclic compounds	Azobenzenes	Not Available	-	71.8	-	-	2.4899	2.4895	2.8167	7.56e-07	3.858e-05	4.7741	4.9486	4.9393	1.7709	1.7154	1.7194
neg_3213	Lamivudine	metab_12213	yes	up	C07065	neg	134678-17-4	503.099	4.7878	2M+FA-H	C8H11N3O3S	-	51.5	HMDB0251826;HMDB0014847;PW_C009184	-	-	-	-	-	Nucleosides, nucleotides, and analogues	Nucleoside and nucleotide analogues	3''-thia pyrimidine nucleosides	-	51.5	-	-	2.4117	2.4113	2.5206	5.539e-08	1.253e-05	4.8547	4.9193	4.9258	1.9802	1.9244	1.9284
neg_3245	Tetranor 12-HETE	metab_12245	yes	up	-	neg	-	287.165	4.94718	M+Na-2H	C16H26O3	-	57.3	HMDB0060055	-	-	-	-	-	Lipids and lipid-like molecules	Fatty Acyls	Fatty acids and conjugates	-	57.3	-	-	1.0755	1.0757	1.4086	0.04435	0.06735	2.3921	2.6917	2.2909	2.175	1.5283	1.5322
neg_3286	9,10,13-Trihydroxystearic acid	metab_12286	yes	down	-	neg	50439-74-2	331.249	5.15127	M-H	C18H36O5	-	49	HMDB0030935	-	-	-	-	-	Lipids and lipid-like molecules	Fatty Acyls	Fatty acids and conjugates	-	49	-	-	1.1836	1.1821	0.8464	0.0003623	0.001921	3.994	3.9202	4.0238	4.7235	4.7854	4.5933
neg_3584	9-OxoOTrE	metab_12584	yes	down	-	neg	-	291.197	7.00158	M-H	C18H28O3	57	-	-	-	-	-	-	-	-	-	-	57	-	-	-	1.0036	1.0033	0.8858	0.003434	0.009141	4.164	4.1639	4.1706	4.5394	4.8335	4.7373
neg_3677	Eriojaposide B	metab_12676	yes	up	C17889	neg	351412-97-0	561.256	7.35287	M+FA-H	C25H40O11	-	69.9	HMDB0038029	-	-	-	-	-	Lipids and lipid-like molecules	Fatty Acyls	Fatty acyl glycosides	-	69.9	-	-	1.2867	1.2865	1.2603	0.0004428	0.002159	4.2467	4.0933	4.0944	3.4103	3.2526	3.2039
neg_3988	(3beta,5alpha,9alpha,14alpha,22E,24R)-3,5,9,14-Tetrahydroxyergosta-7,22-dien-6-one	metab_12987	yes	down	-	neg	211486-14-5	441.301	8.73403	M-H2O-H	C28H44O5	-	39.9	HMDB0032690	-	-	-	-	-	Lipids and lipid-like molecules	Steroids and steroid derivatives	Ergostane steroids	-	39.9	-	-	1.8035	1.8027	0.628	1.247e-05	0.0002269	2.7606	2.7642	2.8625	4.3483	4.526	4.4823
neg_4282	GPA(18:2/18:2)	metab_13281	yes	down	-	neg	-	695.466	10.1283	M-H	C39H69O8P	79.4	-	-	-	-	-	-	-	-	-	-	79.4	-	-	-	1.628	1.6288	0.7522	0.0001505	0.001065	4.3107	4.0976	3.9979	5.4936	5.4465	5.5521
neg_5122	PE-NMe(18:0/18:2(9Z,12Z))	metab_14121	yes	up	C01241	neg	-	802.561	10.307	M+FA-H	C42H80NO8P	-	44.9	HMDB0113089;PW_C059212	-	-	-	-	-	Lipids and lipid-like molecules	Glycerophospholipids	Glycerophosphoethanolamines	-	44.9	-	-	1.1957	1.1953	1.1414	1.15e-05	0.0002151	5.8571	5.9339	5.8629	5.1407	5.1784	5.1501
neg_5124	GPA(18:1/18:2)	metab_14123	yes	down	-	neg	-	697.482	10.307	M-H	C39H71O8P	85.2	-	-	-	-	-	-	-	-	-	-	85.2	-	-	-	1.7069	1.7069	0.7315	5.589e-05	0.000581	4.1885	4.0305	3.9583	5.4655	5.6288	5.5525
neg_5127	PE-NMe(18:1(11Z)/20:2(11Z,14Z))	metab_14126	yes	up	C01241	neg	-	828.576	10.2749	M+FA-H	C44H82NO8P	-	56.4	HMDB0113122;PW_C059245	-	-	-	-	-	Lipids and lipid-like molecules	Glycerophospholipids	Glycerophosphoethanolamines	-	56.4	-	-	1.2508	1.2515	1.151	0.0003362	0.001823	6.15	6.1355	6.1908	5.2646	5.4867	5.3006
neg_5188	Cerebronic acid	metab_14187	yes	down	C17873	neg	544-57-0	383.353	9.98937	M-H	C24H48O3	-	68.2	HMDB0039540	-	-	-	-	-	Lipids and lipid-like molecules	Fatty Acyls	Fatty acids and conjugates	-	68.2	-	-	1.1386	1.1384	0.8752	0.0001357	0.001001	4.6833	4.6649	4.6479	5.2451	5.3984	5.3475
neg_5195	DG(16:0/20:2(11Z,14Z)/0:0)	metab_14194	yes	up	C00165	neg	-	641.511	9.93125	M+Na-2H	C39H72O5	-	43.5	PW_C003160;HMDB0007109	-	-	-	-	-	Lipids and lipid-like molecules	Glycerolipids	Diradylglycerols	-	43.5	-	-	1.3654	1.3654	1.2449	0.0005976	0.002658	4.9695	4.9313	4.8449	3.8317	4.1278	3.8854
neg_5201	PE-NMe(18:1(11Z)/20:3(5Z,8Z,11Z))	metab_14200	yes	up	C01241	neg	-	826.561	9.90082	M+FA-H	C44H80NO8P	-	61.6	PW_C059246;HMDB0113123	-	-	-	-	-	Lipids and lipid-like molecules	Glycerophospholipids	Glycerophosphoethanolamines	-	61.6	-	-	1.0892	1.0878	1.1187	0.0005172	0.002415	5.7787	5.7991	5.752	5.1692	5.06	5.2621
neg_5324	Annomuricin-D-one	metab_14323	yes	up	-	neg	-	633.438	9.31478	M+Na-2H	C35H64O8	-	70.4	HMDB0030890	-	-	-	-	-	Lipids and lipid-like molecules	Fatty Acyls	Fatty alcohols	-	70.4	-	-	1.5895	1.5907	1.328	0.0002161	0.001341	5.187	5.2671	5.3579	4.0222	4.0898	3.7952
neg_5765	MG(0:0/a-17:0/0:0)[rac]	metab_14764	yes	up	-	neg	-	365.27	7.89978	M+Na-2H	C20H40O4	-	64.5	HMDB0072848	-	-	-	-	-	Lipids and lipid-like molecules	Glycerolipids	Monoradylglycerols	-	64.5	-	-	1.2891	1.2887	1.3682	0.0002827	0.00161	3.1877	3.2237	3.1318	2.4585	2.2569	2.2609
neg_5769	11(R)-HEDE	metab_14768	yes	up	-	neg	-	323.259	7.88552	M-H	C20H36O3	70.3	-	-	-	-	-	-	-	-	-	-	70.3	-	-	-	1.2687	1.2695	1.3104	0.0006475	0.002792	3.5901	3.4902	3.5077	2.7672	2.7807	2.5309
neg_5787	LysoPA(0:0/18:2(9Z,12Z))	metab_14786	yes	down	-	neg	-	433.236	7.83945	M-H	C21H39O7P	-	86.2	HMDB0007852	-	-	-	-	-	Lipids and lipid-like molecules	Glycerophospholipids	Glycerophosphates	-	86.2	-	-	1.3187	1.3196	0.8294	0.001194	0.004257	4.6289	4.3777	4.2763	5.3944	5.2713	5.3499
neg_5924	9(S)-HOTrE	metab_14923	yes	down	C16326	neg	-	293.212	7.37588	M-H	C18H30O3	51.4	-	HMDB0247705	-	-	map00592	Metabolism	Lipid metabolism	Lipids and lipid-like molecules	Fatty Acyls	Lineolic acids and derivatives	51.4	-	alpha-Linolenic acid metabolism	alpha-Linolenic acid metabolism	1.0084	1.0087	0.9043	0.01606	0.02925	5.4701	5.4173	5.4623	5.7446	6.2088	6.1279
neg_6376	KOPARIN 2'-METHYL ETHER	metab_15375	yes	up	-	neg	-	313.072	5.44493	M-H	C17H14O6	66.7	-	-	-	-	-	-	-	-	-	-	66.7	-	-	-	1.8071	1.8036	1.6169	0.003609	0.009518	4.602	5.0033	4.0688	2.9332	2.6488	2.874
neg_6385	(+/-)alpha-CMBHC	metab_15384	yes	down	-	neg	-	319.192	5.39945	M-H	C19H28O4	39.8	-	-	-	-	-	-	-	-	-	-	39.8	-	-	-	1.3085	1.3081	0.7773	0.004824	0.01186	3.2389	3.3279	3.0895	4.3795	4.1715	3.8713
neg_6402	Traumatin	metab_15401	yes	down	C16309	neg	65410-38-0	233.115	5.3095	M+Na-2H	C12H20O3	-	49.4	HMDB0037326;LMFA01060093	-	-	map00592;map01110	Metabolism;Metabolism	Lipid metabolism;Global and overview maps	Lipids and lipid-like molecules	Fatty Acyls	Fatty acids and conjugates	-	49.4	alpha-Linolenic acid metabolism;Biosynthesis of secondary metabolites	alpha-Linolenic acid metabolism;Biosynthesis of secondary metabolites	1.1515	1.1493	0.7565	0.008	0.0174	2.3687	1.9989	2.3928	2.8954	3.1271	2.9124
neg_6412	Eupatorin	metab_15411	yes	up	-	neg	-	343.082	5.2423	M-H	C18H16O7	75.6	-	HMDB0252128;LMPK12111239	-	-	-	-	-	Phenylpropanoids and polyketides	Flavonoids	O-methylated flavonoids	75.6	-	-	-	1.2789	1.2747	1.3637	0.04581	0.06925	3.7747	4.3855	3.1679	2.7346	2.7929	2.7782
neg_6444	Trans-3,3',4',5,5',7-Hexahydroxyflavanone	metab_15443	yes	up	-	neg	27200-12-0	319.046	5.1057	M-H	C15H12O8	-	83	HMDB0030835	-	-	-	-	-	Phenylpropanoids and polyketides	Flavonoids	Flavans	-	83	-	-	1.9361	1.9353	4.9785	0.0007222	0.002988	2.4585	2.2582	2.5891	0.2138	0.4152	0.8383
neg_6506	Gomphidic acid	metab_15505	yes	up	-	neg	25328-77-2	393.025	4.83337	M+Na-2H	C18H12O9	-	58.1	HMDB0033542	-	-	-	-	-	Benzenoids	Phenols	Benzenetriols and derivatives	-	58.1	-	-	2.511	2.5125	2.4471	0.0005784	0.002594	5.5224	5.4667	5.611	2.8308	2.255	1.6982
neg_6573	2-(3,4-dihydroxyphenyl)-5,7-dihydroxy-3,6-dimethoxy-4H-chromen-4-one	metab_15572	yes	up	-	neg	-	367.046	4.58297	M+Na-2H	C17H14O8	-	65.5	-	-	-	-	-	-	-	-	-	-	65.5	-	-	2.028	2.0258	2.0324	0.01951	0.03412	4.5377	4.7806	4.6132	3.2907	1.152	2.4123
neg_6576	Diosmetin	metab_15575	yes	up	C10038	neg	520-34-3	299.056	4.58297	M-H	C16H12O6	63.8	-	LMPK12110824;HMDB0029676	-	-	-	-	-	Phenylpropanoids and polyketides	Flavonoids	O-methylated flavonoids	63.8	-	-	-	1.1404	1.1382	1.1707	0.009829	0.01981	5.0933	5.0378	4.6235	4.2887	4.177	4.1371
neg_6634	2-Keto-3-deoxy-6-phosphogluconic acid	metab_15632	yes	up	C04442	neg	27244-54-8	303.015	4.37797	M+FA-H	C6H11O9P	-	61.7	HMDB0001376	-	-	map01100;map00030;map01200	Metabolism;Metabolism;Metabolism	Global and overview maps;Carbohydrate metabolism;Global and overview maps	Organic acids and derivatives	Keto acids and derivatives	Medium-chain keto acids and derivatives	-	61.7	Metabolic pathways;Pentose phosphate pathway;Carbon metabolism	Metabolic pathways;Pentose phosphate pathway;Carbon metabolism	2.5095	2.5081	2.5089	0.0001773	0.001181	5.5217	5.1716	5.43	2.3992	1.7117	2.315
neg_6686	3-[[5-Methyl-2-(1-methylethyl)cyclohexyl]oxy]-1,2-propanediol	metab_15684	yes	down	-	neg	87061-04-9	275.186	4.2187	M+FA-H	C13H26O3	-	39.1	HMDB0036133	-	-	-	-	-	Lipids and lipid-like molecules	Prenol lipids	Monoterpenoids	-	39.1	-	-	1.5839	1.5834	0.6697	0.0007751	0.003156	2.8405	2.4834	2.6072	4.1339	3.8909	3.818
neg_6694	4-(3-hydroxybutyl)-2-methoxyphenol	metab_15692	yes	up	-	neg	-	241.108	4.19597	M+FA-H	C11H16O3	-	47.2	-	-	-	-	-	-	-	-	-	-	47.2	-	-	1.5928	1.5914	1.4241	9.365e-05	0.0007907	4.4574	4.3573	4.2515	3.1225	2.9451	3.1064
neg_6774	1-Hydroxy-3-nonanone	metab_15772	yes	down	-	neg	67801-46-1	203.128	3.9913	M+FA-H	C9H18O2	-	43.3	LMFA05000601;HMDB0037143	-	-	-	-	-	Lipids and lipid-like molecules	Fatty Acyls	Fatty alcohols	-	43.3	-	-	1.8418	1.8424	0.4919	0.006347	0.01463	2.2504	1.8431	1.2719	3.9268	3.7482	3.2297
neg_6784	Eriodictyol	metab_15782	yes	up	C05631	neg	552-58-9	287.056	3.96858	M-H	C15H12O6	82.5	-	HMDB0005810;LMPK12140002	-	-	map01100;map00941;map01110	Metabolism;Metabolism;Metabolism	Global and overview maps;Biosynthesis of other secondary metabolites;Global and overview maps	Phenylpropanoids and polyketides	Flavonoids	Flavans	82.5	-	Metabolic pathways;Flavonoid biosynthesis;Biosynthesis of secondary metabolites	Metabolic pathways;Flavonoid biosynthesis;Biosynthesis of secondary metabolites	1.3998	1.3979	1.2651	0.0007336	0.003018	4.9668	4.903	4.6728	3.9258	3.7142	3.8553
neg_6815	1-O-Feruloylglucose	metab_15813	yes	up	-	neg	7196-71-6	377.088	3.90032	M+Na-2H	C16H20O9	-	66.2	HMDB0036938	-	-	-	-	-	Phenylpropanoids and polyketides	Cinnamic acids and derivatives	Hydroxycinnamic acids and derivatives	-	66.2	-	-	1.4572	1.4557	1.399	0.008534	0.01838	4.4249	3.8333	4.0052	3.1878	2.6156	2.962
neg_6878	4''-O-Acetylafzelin	metab_15876	yes	up	-	neg	135618-17-6	519.114	3.74102	M+FA-H	C23H22O11	-	45.9	HMDB0039746	-	-	-	-	-	Phenylpropanoids and polyketides	Flavonoids	Flavonoid glycosides	-	45.9	-	-	1.5331	1.5327	1.3813	1.304e-05	0.0002335	4.3506	4.2845	4.3836	3.0969	3.1168	3.2126
neg_6890	Azlocillin	metab_15888	yes	up	C06839	neg	37091-66-0	496.11	3.71818	M+Cl	C20H23N5O6S	-	40.1	HMDB0015194	-	-	-	-	-	Organic acids and derivatives	Carboxylic acids and derivatives	Amino acids, peptides, and analogues	-	40.1	-	-	1.5654	1.5645	1.3505	0.0001762	0.001176	4.7716	4.8672	4.9007	3.4945	3.5135	3.7587
neg_6893	Naringenin-7-O-glucoside	metab_15891	yes	up	-	neg	-	433.114	3.71818	M-H	C21H22O10	94.4	-	-	-	-	-	-	-	-	-	-	94.4	-	-	-	1.3781	1.3781	1.2519	0.0002486	0.001478	4.8174	4.8453	4.9197	4.0234	3.7769	3.8487
neg_6919	8-hydroxy-6,7-dimethoxy-2H-chromen-2-one	metab_15917	yes	up	-	neg	-	243.03	3.67257	M+Na-2H	C11H10O5	-	36.4	-	-	-	-	-	-	-	-	-	-	36.4	-	-	2.4486	2.448	3.2585	1.626e-06	5.946e-05	4.2965	4.526	4.3738	1.3846	1.3306	1.3345
neg_6957	Rosuvastatin 5 S-lactone	metab_15955	yes	up	-	neg	-	498.126	3.58143	M+Cl	C22H26FN3O5S	-	36	HMDB0060941	-	-	-	-	-	Organoheterocyclic compounds	Diazines	Pyrimidines and pyrimidine derivatives	-	36	-	-	2.185	2.1848	2.2993	4.831e-06	0.0001222	4.1608	4.3798	4.365	1.9073	1.8515	1.8555
neg_6971	S-Nitrosoglutathione	metab_15969	yes	up	-	neg	57564-91-7	371.041	3.55868	M+Cl	C10H16N4O7S	-	76.7	HMDB0004645;HMDB0257412	-	-	-	-	-	Organic acids and derivatives	Carboxylic acids and derivatives	Amino acids, peptides, and analogues	-	76.7	-	-	2.2501	2.2497	2.3916	1.738e-07	2.094e-05	4.3698	4.4672	4.4297	1.8849	1.8292	1.8332
neg_6999	Vanillic acid-4-O-glucuronide	metab_15997	yes	up	-	neg	18191-12-3	363.072	3.51303	M+Na-2H	C15H18O9	-	84.7	HMDB0060024	-	-	-	-	-	Organic oxygen compounds	Organooxygen compounds	Carbohydrates and carbohydrate conjugates	-	84.7	-	-	1.9808	1.9798	1.8553	0.0008164	0.003287	4.7143	4.1948	4.3649	2.6827	2.1143	2.3577
neg_7002	2-O-(6-Phospho-alpha-mannosyl)-D-glycerate	metab_16000	yes	up	C16699	neg	-	329.03	3.51303	M-H2O-H	C9H17O12P	-	73.6	HMDB0012152	-	-	-	-	-	Organic oxygen compounds	Organooxygen compounds	Carbohydrates and carbohydrate conjugates	-	73.6	-	-	2.472	2.4707	2.8413	9.366e-06	0.0001898	4.7947	4.8087	4.7934	1.6636	1.5119	1.8906
neg_7026	Quercitrin	metab_16024	yes	up	C01750	neg	522-12-3	469.078	3.46753	M+Na-2H	C21H20O11	-	62.9	HMDB0033751;HMDB0257017;LMPK12112171	-	-	map00944	Metabolism	Biosynthesis of other secondary metabolites	Phenylpropanoids and polyketides	Flavonoids	Flavonoid glycosides	-	62.9	Flavone and flavonol biosynthesis	Flavone and flavonol biosynthesis	2.4566	2.4563	2.9308	4.119e-07	2.866e-05	4.5638	4.7043	4.7016	1.624	1.5689	1.5729
neg_7096	Hesperetin	metab_16094	yes	up	C01709	neg	520-33-2	347.077	3.35355	M+FA-H	C16H14O6	-	74.2	HMDB0005782;LMPK12140003	-	-	map00941	Metabolism	Biosynthesis of other secondary metabolites	Phenylpropanoids and polyketides	Flavonoids	O-methylated flavonoids	-	74.2	Flavonoid biosynthesis	Flavonoid biosynthesis	1.5203	1.5199	1.3405	0.0001225	0.0009365	4.7016	4.6403	4.6425	3.3221	3.5678	3.5401
neg_7122	Glucorhein	metab_16120	yes	up	-	neg	34298-86-7	467.062	3.30795	M+Na-2H	C21H18O11	-	53.8	HMDB0032877	-	-	-	-	-	Benzenoids	Anthracenes	Anthracenecarboxylic acids and derivatives	-	53.8	-	-	2.4851	2.4852	2.5617	1.899e-05	0.0002951	5.1378	5.1211	5.2421	2.2654	1.9438	1.8412
neg_7144	3-(3-hydroxyphenyl)-7-methoxy-3,4-dihydro-2H-1-benzopyran-4-one	metab_16142	yes	up	-	neg	-	315.088	3.28508	M+FA-H	C16H14O4	-	68.6	-	-	-	-	-	-	-	-	-	-	68.6	-	-	1.2112	1.2098	1.1978	0.001155	0.004157	4.5879	4.6601	4.6514	3.8848	3.7053	4.0137
neg_7175	Gly Leu Phe	metab_16173	yes	down	-	neg	-	334.177	3.23945	M-H	C17H25N3O4	74	-	-	-	-	-	-	-	-	-	-	74	-	-	-	1.1827	1.1848	0.7317	0.04466	0.06776	2.3729	2.8558	1.8723	3.196	3.4214	3.0871
neg_7176	2,4',5,7-Tetrahydroxyflavanone	metab_16174	yes	up	-	neg	58124-18-8	333.062	3.23945	M+FA-H	C15H12O6	-	87.9	HMDB0040314	-	-	-	-	-	Phenylpropanoids and polyketides	Flavonoids	Hydroxyflavonoids	-	87.9	-	-	2.3765	2.3762	2.0823	0.0007064	0.00294	5.5814	5.6037	5.7448	2.0962	3.0279	3.006
neg_7189	Pyridine N-oxide glucuronide	metab_16187	yes	up	-	neg	-	307.046	3.21655	M+Cl	C11H14NO7+	-	68.9	HMDB0061177	-	-	-	-	-	Organic oxygen compounds	Organooxygen compounds	Carbohydrates and carbohydrate conjugates	-	68.9	-	-	2.1723	2.1715	3.3428	8.749e-07	4.242e-05	3.4501	3.4812	3.3367	1.0573	1.006	1.0097
neg_7205	6-Formylumbelliferone	metab_16203	yes	up	-	neg	-	235.024	3.1937	M+FA-H	C10H6O4	-	65.3	HMDB0039147	-	-	-	-	-	Phenylpropanoids and polyketides	Coumarins and derivatives	Hydroxycoumarins	-	65.3	-	-	2.0131	2.0135	2.0853	0.001881	0.005882	4.0729	4.2022	4.0417	1.4959	2.4928	1.9188
neg_7233	11,13-Dihydrotaraxinic acid glucosyl ester	metab_16231	yes	up	-	neg	75911-16-9	471.187	3.1481	M+FA-H	C21H30O9	-	80.4	HMDB0035867	-	-	-	-	-	Lipids and lipid-like molecules	Saccharolipids	Not Available	-	80.4	-	-	2.3352	2.3316	3.0056	0.001921	0.005983	4.3704	4.2962	4.2191	1.6237	0.6723	1.9908
neg_7288	Daphnetin	metab_16286	yes	up	C03093	neg	486-35-1	177.018	3.05855	M-H	C9H6O4	82.7	-	-	-	-	-	-	-	-	-	-	82.7	-	-	-	1.2106	1.2105	1.211	1.741e-05	0.0002808	4.3317	4.2698	4.2632	3.5674	3.5581	3.4974
neg_7310	Maleylacetoacetic acid	metab_16308	yes	up	C01036	neg	5698-52-2	221.009	3.0139	M+Na-2H	C8H8O6	-	47	HMDB0002052;PW_C001376;LMFA01170114	-	-	map01100;map00350	Metabolism;Metabolism	Global and overview maps;Amino acid metabolism	Organic acids and derivatives	Keto acids and derivatives	Medium-chain keto acids and derivatives	-	47	Metabolic pathways;Tyrosine metabolism	Metabolic pathways;Tyrosine metabolism	2.6886	2.6879	3.4986	4.826e-08	1.18e-05	5.1398	5.1982	5.0901	1.4909	1.4791	1.4403
neg_7314	3,7-Dimethylquercetin	metab_16312	yes	up	C01265	neg	2068-02-02	375.072	2.9984	M+FA-H	C17H14O7	-	68.3	HMDB0029263	-	-	map00944	Metabolism	Biosynthesis of other secondary metabolites	Phenylpropanoids and polyketides	Flavonoids	O-methylated flavonoids	-	68.3	Flavone and flavonol biosynthesis	Flavone and flavonol biosynthesis	2.1257	2.1251	2.1124	5.268e-07	3.224e-05	4.3161	4.4297	4.3347	2.0996	2.0435	2.0476
neg_7317	5-Methoxysalicylic acid	metab_16315	yes	up	-	neg	2612-02-04	167.034	2.9984	M-H	C8H8O4	70.9	-	HMDB0001868	-	-	-	-	-	Benzenoids	Benzene and substituted derivatives	Benzoic acids and derivatives	70.9	-	-	-	1.5828	1.5822	1.2766	5.226e-05	0.0005587	5.9962	5.8935	5.832	4.5352	4.7108	4.6361
neg_7330	(E)-8-Hydroxy-2-octene-4,6-diynoic acid	metab_16328	yes	up	-	neg	65367-65-9	195.029	2.97622	M+FA-H	C8H6O3	-	54.3	HMDB0031515	-	-	-	-	-	Lipids and lipid-like molecules	Fatty Acyls	Fatty acids and conjugates	-	54.3	-	-	1.6626	1.6625	1.3094	1.607e-05	0.0002687	6.0402	5.8907	5.9583	4.4997	4.6255	4.5358
neg_7418	4-Hydroxy-6-methyl-3-(1-oxobutyl)-2H-pyran-2-one	metab_16416	yes	up	-	neg	22073-85-4	241.071	2.86252	M+FA-H	C10H12O4	-	57.9	HMDB0040637	-	-	-	-	-	Organic oxygen compounds	Organooxygen compounds	Carbonyl compounds	-	57.9	-	-	1.353	1.3542	1.4737	0.001501	0.004972	3.0834	2.9171	2.9794	2.0505	2.2184	1.8232
neg_7444	Shoyuflavone A	metab_16442	yes	up	-	neg	190712-87-9	407.041	2.81658	M+Na-2H	C19H14O9	-	40.1	HMDB0034582	-	-	-	-	-	Phenylpropanoids and polyketides	Isoflavonoids	Isoflav-2-enes	-	40.1	-	-	2.8218	2.8212	21.9699	3.5e-10	2.376e-06	4.2528	4.2398	4.2217	0.2061	0.1856	0.187
neg_7448	(R)-Pelletierine	metab_16446	yes	down	-	neg	2858-66-4	186.113	2.81658	M+FA-H	C8H15NO	-	40.7	HMDB0030324	-	-	-	-	-	Organoheterocyclic compounds	Piperidines	Not Available	-	40.7	-	-	1.1305	1.1333	0.8364	0.01874	0.0331	3.8248	3.704	3.7559	4.4055	4.2258	4.8621
neg_7525	Cordeauxione	metab_16523	yes	up	-	neg	1228-77-9	273.041	2.72493	M-H2O-H	C14H12O7	-	61.3	HMDB0034310	-	-	-	-	-	Organic acids and derivatives	Vinylogous acids	Not Available	-	61.3	-	-	2.1937	2.1914	2.1075	0.00041	0.002065	4.6776	4.7533	4.739	2.0885	1.9465	2.6893
neg_7552	Quercetin 3-[rhamnosyl-(1->2)-alpha-L-arabinopyranoside]	metab_16550	yes	up	-	neg	86749-52-2	601.121	2.6791	M+Na-2H	C26H28O15	-	54	HMDB0037928	-	-	-	-	-	Phenylpropanoids and polyketides	Flavonoids	Flavonoid glycosides	-	54	-	-	1.9125	1.9127	1.6019	8.127e-05	0.0007287	4.9498	4.9639	5.041	2.9142	3.2973	3.1238
neg_7557	Benzyl O-[arabinofuranosyl-(1->6)-glucoside]	metab_16555	yes	up	-	neg	88510-11-6	383.135	2.6791	M-H2O-H	C18H26O10	-	43.3	HMDB0041514	-	-	-	-	-	Organic oxygen compounds	Organooxygen compounds	Carbohydrates and carbohydrate conjugates	-	43.3	-	-	2.1832	2.1831	2.5192	0.001208	0.004287	4.1096	4.209	4.0848	1.0772	2.1098	1.7369
neg_7601	Butyl salicylate	metab_16599	yes	up	-	neg	2052-14-4	239.092	2.63327	M+FA-H	C11H14O3	-	51.8	HMDB0040730	-	-	-	-	-	Benzenoids	Benzene and substituted derivatives	Benzoic acids and derivatives	-	51.8	-	-	1.1822	1.1814	1.2314	0.002374	0.00696	4.1419	3.838	3.8191	3.2353	3.2013	3.1454
neg_7647	Myricetin	metab_16645	yes	up	C10107	neg	529-44-2	317.03	2.56447	M-H	C15H10O8	41.5	-	HMDB0002755;LMPK12110001	-	-	map00941;map01110;map00944	Metabolism;Metabolism;Metabolism	Biosynthesis of other secondary metabolites;Global and overview maps;Biosynthesis of other secondary metabolites	Phenylpropanoids and polyketides	Flavonoids	Flavones	41.5	-	Flavonoid biosynthesis;Biosynthesis of secondary metabolites;Flavone and flavonol biosynthesis	Flavonoid biosynthesis;Biosynthesis of secondary metabolites;Flavone and flavonol biosynthesis	2.3326	2.3328	2.0666	3.153e-06	9.069e-05	5.3939	5.2927	5.4135	2.6004	2.7068	2.4831
neg_7689	Phenylglucuronide	metab_16687	yes	up	-	neg	-	291.051	2.51885	M+Na-2H	C12H14O7	-	59.4	HMDB0059806	-	-	-	-	-	Organic oxygen compounds	Organooxygen compounds	Carbohydrates and carbohydrate conjugates	-	59.4	-	-	2.6134	2.6106	5.7293	0.001016	0.00379	4.2269	4.3303	4.3683	0.3152	0.3645	1.5768
neg_7703	3-Glucosyl-2,3',4,4',6-pentahydroxybenzophenone	metab_16701	yes	up	-	neg	92631-83-9	423.094	2.496	M-H	C19H20O11	-	37	HMDB0032645	-	-	-	-	-	Organic oxygen compounds	Organooxygen compounds	Carbohydrates and carbohydrate conjugates	-	37	-	-	1.8731	1.8732	1.6748	0.001811	0.005715	4.5198	4.5972	4.636	2.2464	3.0521	2.9121
neg_7705	3,4,5-trihydroxy-6-(1-oxo-1H-isochromene-3-carbonyloxy)oxane-2-carboxylic acid	metab_16703	yes	up	-	neg	-	347.041	2.496	M-H2O-H	C16H14O10	-	80.8	-	-	-	-	-	-	-	-	-	-	80.8	-	-	1.5402	1.5399	1.5347	0.0004189	0.002092	3.7195	3.3315	3.5057	2.3292	2.273	2.2771
neg_7719	Flavanomarein	metab_16717	yes	up	-	neg	-	449.109	2.47328	M-H	C21H22O11	62.3	-	-	-	-	-	-	-	-	-	-	62.3	-	-	-	1.2335	1.2342	1.2634	0.001253	0.004393	3.8696	3.8267	3.7728	3.1437	3.0942	2.8398
neg_7759	Raffinose	metab_16757	yes	up	C00492	neg	512-69-6	541.12	2.42725	M+K-2H	C18H32O16	-	44	PW_C001805;HMDB0003213	-	-	map01100;map02010;map00052	Metabolism;Environmental Information Processing;Metabolism	Global and overview maps;Membrane transport;Carbohydrate metabolism	Organic oxygen compounds	Organooxygen compounds	Carbohydrates and carbohydrate conjugates	-	44	Metabolic pathways;ABC transporters;Galactose metabolism	Metabolic pathways;ABC transporters;Galactose metabolism	1.4956	1.4954	1.5988	0.001043	0.003863	3.3527	2.882	3.1142	1.9848	1.9289	1.9329
neg_7775	Taxifolin 3-arabinoside	metab_16773	yes	up	-	neg	-	435.094	2.40465	M-H	C20H20O11	-	47.9	HMDB0041418	-	-	-	-	-	Phenylpropanoids and polyketides	Diarylheptanoids	Cyclic diarylheptanoids	-	47.9	-	-	1.7588	1.7585	1.5445	4.398e-07	2.956e-05	4.4301	4.4555	4.4999	2.8585	2.8972	2.912
neg_7813	Wyeronic acid	metab_16811	yes	up	-	neg	117783-52-5	275.056	2.3586	M+FA-H	C13H10O4	-	45.9	HMDB0039141	-	-	-	-	-	Lipids and lipid-like molecules	Fatty Acyls	Fatty acids and conjugates	-	45.9	-	-	2.3513	2.3506	2.8077	1.297e-06	5.286e-05	4.4046	4.346	4.346	1.4419	1.5923	1.6299
neg_7838	Quercetin 3-O-glucoside	metab_16836	yes	up	C05623	neg	482-35-9;21637-25-2	463.089	2.31362	M-H	C21H20O12	33	-	HMDB0037362	-	-	map01100;map01110;map00944	Metabolism;Metabolism;Metabolism	Global and overview maps;Global and overview maps;Biosynthesis of other secondary metabolites	Phenylpropanoids and polyketides	Flavonoids	Flavonoid glycosides	33	-	Metabolic pathways;Biosynthesis of secondary metabolites;Flavone and flavonol biosynthesis	Metabolic pathways;Biosynthesis of secondary metabolites;Flavone and flavonol biosynthesis	2.2682	2.2681	2.0824	0.0009189	0.003534	5.1777	5.0851	5.2103	1.8778	2.8449	2.7085
neg_7871	Cystathionine ketimine	metab_16869	yes	up	-	neg	87254-95-3	224.002	2.2909	M+Na-2H	C7H9NO4S	-	36.4	HMDB0002015	-	-	-	-	-	Organic acids and derivatives	Carboxylic acids and derivatives	Amino acids, peptides, and analogues	-	36.4	-	-	1.2919	1.2919	1.5982	6.532e-05	0.0006405	2.1877	2.3329	2.3178	1.4606	1.4062	1.4101
neg_7908	4-(4-Hydroxyphenyl)-2-butanone glucoside	metab_16906	yes	up	-	neg	38963-94-9	371.135	2.2237	M+FA-H	C16H22O7	-	54.4	HMDB0034863	-	-	-	-	-	Organic oxygen compounds	Organooxygen compounds	Carbohydrates and carbohydrate conjugates	-	54.4	-	-	1.4731	1.4712	1.4425	0.0004597	0.002226	3.7102	3.7383	3.5034	2.4076	2.5146	2.6705
neg_7942	Procyanidin B2	metab_16940	yes	down	C17639	neg	29106-49-8	577.135	2.1562	M-H	C30H26O12	94.7	-	LMPK12030002;HMDB0033973	-	-	-	-	-	Phenylpropanoids and polyketides	Flavonoids	Biflavonoids and polyflavonoids	94.7	-	-	-	1.3156	1.3157	0.8423	2.09e-06	6.888e-05	4.7349	4.6937	4.6731	5.5677	5.5725	5.6039
neg_7971	3,4,5-trihydroxy-6-[(2-phenylacetyl)oxy]oxane-2-carboxylic acid	metab_16968	yes	up	-	neg	-	683.183	2.11192	2M+Hac-H	C14H16O8	-	54	-	-	-	-	-	-	-	-	-	-	54	-	-	1.0527	1.0531	1.2664	0.04107	0.06312	2.7831	3.4645	3.4363	2.5393	2.4633	2.6431
neg_7976	(S)C(S)S-S-Methylcysteine sulfoxide	metab_16973	yes	down	-	neg	32726-14-0	452.081	2.11192	3M-H	C4H9NO3S	-	34.2	HMDB0029432	-	-	-	-	-	Organic acids and derivatives	Carboxylic acids and derivatives	Amino acids, peptides, and analogues	-	34.2	-	-	1.9111	1.9061	0.3803	0.01154	0.02246	0.6991	0.8883	2.1457	3.3532	3.3243	3.1368
neg_7983	5-Hydroxy-p-mentha-6,8-dien-2-one	metab_16980	yes	down	-	neg	56423-48-4	211.097	2.11192	M+FA-H	C10H14O2	-	62.9	HMDB0037011	-	-	-	-	-	Lipids and lipid-like molecules	Prenol lipids	Monoterpenoids	-	62.9	-	-	1.2172	1.2177	0.8099	0.0006114	0.002693	3.2831	3.2572	3.2866	3.9027	4.0591	4.1718
neg_7996	AESCULIN	metab_16993	yes	up	C09264	neg	531-75-9	339.072	2.0893	M-H	C15H16O9	36.9	-	HMDB0030820	-	-	-	-	-	Phenylpropanoids and polyketides	Coumarins and derivatives	Coumarin glycosides	36.9	-	-	-	1.8809	1.8816	1.678	7.996e-05	0.0007218	4.4683	4.4706	4.522	2.5853	2.8908	2.547
neg_8046	Furaneol 4-(6-malonylglucoside)	metab_17042	yes	up	-	neg	-	357.083	2.023	M-H2O-H	C15H20O11	-	72.7	HMDB0029778	-	-	-	-	-	Organic oxygen compounds	Organooxygen compounds	Carbohydrates and carbohydrate conjugates	-	72.7	-	-	1.3249	1.3236	1.2927	0.002382	0.006978	4.237	4.0488	3.9971	3.3706	2.9757	3.1543
neg_8049	Theogallin	metab_17045	yes	up	C10834	neg	17365-11-6;53584-43-3	325.056	2.023	M-H2O-H	C14H16O10	-	70.7	HMDB0039287	-	-	-	-	-	Organic oxygen compounds	Organooxygen compounds	Alcohols and polyols	-	70.7	-	-	1.067	1.0662	1.2676	0.01992	0.03466	3.4091	2.8464	3.0533	2.3441	2.4541	2.5469
neg_8059	1-Methyl-4-nitroimidazole	metab_17055	yes	up	C16621	neg	3034-41-1	108.02	2.023	M-H2O-H	C4H5N3O2	-	33	PW_C040688;HMDB0060659	-	-	-	-	-	Organoheterocyclic compounds	Azoles	Imidazoles	-	33	-	-	1.2405	1.2411	1.3707	0.0009132	0.003519	2.8617	3.0749	2.9697	2.2613	2.2006	2.0367
neg_8110	(3,4,5,6-tetrahydroxyoxan-2-yl)methyl 4-hydroxybenzoate	metab_17106	yes	up	-	neg	-	345.083	1.95627	M+FA-H	C13H16O8	-	40.1	-	-	-	-	-	-	-	-	-	-	40.1	-	-	1.086	1.0861	1.1704	0.003593	0.009491	4.3903	4.307	4.2881	3.5271	3.8665	3.7002
neg_8138	Lepidimoic acid	metab_17134	yes	up	-	neg	157676-09-0	343.067	1.93463	M+Na-2H	C12H18O10	-	76.1	HMDB0041096	-	-	-	-	-	Organic oxygen compounds	Organooxygen compounds	Carbohydrates and carbohydrate conjugates	-	76.1	-	-	1.9569	1.9563	1.768	8.178e-06	0.0001757	4.5412	4.4	4.5243	2.5842	2.4395	2.5928
neg_8145	5,7-Dihydroxy-4H-1-benzopyran-4-one	metab_17141	yes	up	C09001	neg	31721-94-5	223.024	1.93463	M+FA-H	C9H6O4	-	70.2	HMDB0032950	-	-	-	-	-	Organoheterocyclic compounds	Benzopyrans	1-benzopyrans	-	70.2	-	-	1.3589	1.3592	1.3108	0.0004299	0.00212	4.1006	4.0007	3.983	3.0022	3.235	2.9814
neg_8160	Benzyl beta-primeveroside	metab_17156	yes	up	-	neg	130622-31-0	401.145	1.91197	M-H	C18H26O10	-	58.2	HMDB0041190	-	-	-	-	-	Organic oxygen compounds	Organooxygen compounds	Carbohydrates and carbohydrate conjugates	-	58.2	-	-	1.8963	1.8951	1.9249	0.0008812	0.003446	4.1174	3.6256	3.9388	2.1606	1.7168	2.192
neg_8183	N-Feruloylglycyl-L-phenylalanine	metab_17179	yes	up	-	neg	40747-82-8	435.093	1.88938	M+K-2H	C21H22N2O6	-	56.9	HMDB0029356	-	-	-	-	-	Organic acids and derivatives	Carboxylic acids and derivatives	Amino acids, peptides, and analogues	-	56.9	-	-	1.9495	1.9502	1.8194	8.683e-05	0.0007586	4.2943	4.2698	4.4062	2.5759	2.3684	2.1833
neg_8480	6-(2,4-dihydroxy-5-methoxybenzoyloxy)-3,4,5-trihydroxyoxane-2-carboxylic acid	metab_17475	yes	up	-	neg	-	359.062	1.61653	M-H	C14H16O11	-	56.4	-	-	-	-	-	-	-	-	-	-	56.4	-	-	1.9429	1.9434	1.857	0.000307	0.001704	4.2546	4.2284	4.1736	2.5564	2.2741	1.985
neg_8557	Casuarine 6-alpha-D-glucoside	metab_17552	yes	down	-	neg	186795-20-0	366.14	1.5037	M-H	C14H25NO10	-	40.6	HMDB0031999	-	-	-	-	-	Organic oxygen compounds	Organooxygen compounds	Carbohydrates and carbohydrate conjugates	-	40.6	-	-	1.1953	1.1942	0.8335	0.0003527	0.001884	3.6678	3.5877	3.7951	4.3701	4.4467	4.4421
neg_8573	Lactosamine	metab_17568	yes	up	C00203	neg	13000-25-4	322.114	1.45982	M-H2O-H	C12H23NO10	-	69.1	HMDB0006591	-	-	map01100;map00520	Metabolism;Metabolism	Global and overview maps;Carbohydrate metabolism	Lipids and lipid-like molecules	Fatty Acyls	Fatty acyl glycosides	-	69.1	Metabolic pathways;Amino sugar and nucleotide sugar metabolism	Metabolic pathways;Amino sugar and nucleotide sugar metabolism	1.5806	1.5798	1.3641	1.336e-05	0.0002355	4.7267	4.8264	4.7528	3.4303	3.4928	3.566
neg_8656	Arborinine	metab_17650	yes	up	C10643	neg	5489-57-6	306.077	1.18197	M+Na-2H	C16H15NO4	-	32.3	HMDB0030177	-	-	-	-	-	Organoheterocyclic compounds	Quinolines and derivatives	Benzoquinolines	-	32.3	-	-	1.4078	1.4085	1.3833	0.04365	0.06646	3.7235	4.7823	4.7367	2.724	3.3398	3.5104
neg_8662	Acaciabiuronic acid	metab_17656	yes	down	-	neg	7264-19-9	337.078	1.13897	M-H2O-H	C12H20O12	-	67.2	HMDB0029938	-	-	-	-	-	Organic oxygen compounds	Organooxygen compounds	Carbohydrates and carbohydrate conjugates	-	67.2	-	-	1.0324	1.0332	0.8821	0.0004499	0.002183	4.1949	4.1043	4.086	4.6244	4.6595	4.7574
neg_8690	Valyl-Aspartate	metab_17684	yes	down	-	neg	20556-16-5	231.098	1.0313	M-H	C9H16N2O5	-	45.6	HMDB0029123	-	-	-	-	-	Organic acids and derivatives	Carboxylic acids and derivatives	Amino acids, peptides, and analogues	-	45.6	-	-	1.0935	1.0948	0.8056	0.01134	0.02216	2.6292	3.0229	2.6515	3.5806	3.3061	3.4207
neg_8692	O-Succinyl-L-homoserine	metab_17686	yes	down	C01118	neg	1492-23-5	218.066	1.0313	M-H	C8H13NO6	31	-	HMDB0255868	-	-	map01100;map00270;map01110;map00920;map01230	Metabolism;Metabolism;Metabolism;Metabolism;Metabolism	Global and overview maps;Amino acid metabolism;Global and overview maps;Energy metabolism;Global and overview maps	Organic acids and derivatives	Carboxylic acids and derivatives	Amino acids, peptides, and analogues	31	-	Metabolic pathways;Cysteine and methionine metabolism;Biosynthesis of secondary metabolites;Sulfur metabolism;Biosynthesis of amino acids	Metabolic pathways;Cysteine and methionine metabolism;Biosynthesis of secondary metabolites;Sulfur metabolism;Biosynthesis of amino acids	1.056	1.056	0.8665	0.0007442	0.00305	3.6799	3.7916	3.8273	4.3042	4.3002	4.4334
neg_8698	Guanine	metab_17692	yes	down	C00242	neg	73-40-5	150.041	1.0313	M-H	C5H5N5O	91.8	-	HMDB0000132;PW_C000086	Nucleic acids	Bases	map01100;map00230	Metabolism;Metabolism	Global and overview maps;Nucleotide metabolism	Organoheterocyclic compounds	Imidazopyrimidines	Purines and purine derivatives	91.8	-	Metabolic pathways;Purine metabolism	Metabolic pathways;Purine metabolism	1.1945	1.1943	0.7799	0.0001477	0.00106	2.6605	2.5597	2.5603	3.4044	3.2965	3.2762
neg_8907	D-Glucarate	metab_17900	yes	down	C00818	neg	87-73-0	209.03	0.622617	M-H	C6H10O8	65.5	-	HMDB0000663	-	-	map01100;map00053	Metabolism;Metabolism	Global and overview maps;Carbohydrate metabolism	Organic oxygen compounds	Organooxygen compounds	Carbohydrates and carbohydrate conjugates	65.5	-	Metabolic pathways;Ascorbate and aldarate metabolism	Metabolic pathways;Ascorbate and aldarate metabolism	1.1172	1.1192	0.8176	0.009771	0.01981	3.2881	3.1609	2.8693	3.9516	3.663	3.7837
neg_46	(-)-Epicatechin	metab_18184	yes	down	C09727	neg	490-46-0;154-23-4	289.072	2.04542	M+Na-2H, M+Cl, M-H	C15H14O6	92.1	-	HMDB0001871;HMDB0002780	-	-	map01100;map00941;map01110	Metabolism;Metabolism;Metabolism	Global and overview maps;Biosynthesis of other secondary metabolites;Global and overview maps	Phenylpropanoids and polyketides	Flavonoids	Flavans	92.1	-	Metabolic pathways;Flavonoid biosynthesis;Biosynthesis of secondary metabolites	Metabolic pathways;Flavonoid biosynthesis;Biosynthesis of secondary metabolites	1.956	1.9564	0.6408	1.667e-05	0.0002747	3.5655	3.556	3.326	5.43	5.4092	5.4641
neg_1953	Amylose	metab_18185	yes	down	C00718	neg	9005-82-7;6118-87-2	351.13	1.79778	M-H2O-H	C2H6.[C12H20O11]n	-	40.4	HMDB0003403;HMDB0038852;PW_C001872	-	-	map01100;map00500;map01110	Metabolism;Metabolism;Metabolism	Global and overview maps;Carbohydrate metabolism;Global and overview maps	Organic oxygen compounds	Organooxygen compounds	Carbohydrates and carbohydrate conjugates	-	40.4	Metabolic pathways;Starch and sucrose metabolism;Biosynthesis of secondary metabolites	Metabolic pathways;Starch and sucrose metabolism;Biosynthesis of secondary metabolites	1.1672	1.1693	0.8357	0.02225	0.03792	3.9076	4.4409	3.7533	4.9568	4.7316	4.7938
neg_8368	Ascorbic acid	metab_18186	yes	up	C00072	neg	50-81-7	197.008	1.70663	M+Na-2H	C6H8O6	-	58.8	HMDB0000044;PW_C000031	Vitamins and cofactors	Vitamins	map01100;map00480;map01110;map00053;map01240	Metabolism;Metabolism;Metabolism;Metabolism;Metabolism	Global and overview maps;Metabolism of other amino acids;Global and overview maps;Carbohydrate metabolism;Global and overview maps	Organoheterocyclic compounds	Dihydrofurans	Furanones	-	58.8	Metabolic pathways;Glutathione metabolism;Biosynthesis of secondary metabolites;Ascorbate and aldarate metabolism;Biosynthesis of cofactors	Metabolic pathways;Glutathione metabolism;Biosynthesis of secondary metabolites;Ascorbate and aldarate metabolism;Biosynthesis of cofactors	1.5875	1.587	1.4149	8.279e-05	0.0007355	4.3777	4.4327	4.3867	2.955	3.1915	3.1816
neg_7965	EPIGALLOCATECHIN	metab_18189	yes	up	C12127;C12136	neg	970-74-1;490-46-0;970-73-0	305.068	2.134	M-H	C15H14O7	32	-	HMDB0302404;HMDB0038361;HMDB0001871;LMPK12020004;HMDB0038365	-	-	map00941;map01110	Metabolism;Metabolism	Biosynthesis of other secondary metabolites;Global and overview maps	Phenylpropanoids and polyketides	Flavonoids	Flavans	32	-	Flavonoid biosynthesis;Biosynthesis of secondary metabolites	Flavonoid biosynthesis;Biosynthesis of secondary metabolites	1.0488	1.0474	1.1929	0.01852	0.03276	4.212	3.7389	3.7159	3.2084	3.2994	3.2728
neg_32	Maltotriose	metab_18194	yes	up	C01835	neg	1109-28-0;6118-87-2	539.138	0.68	M+Cl, M+FA-H, M-H	C18H32O16	71.4	-	HMDB0038852;HMDB0001262	-	-	map02010	Environmental Information Processing	Membrane transport	Organic oxygen compounds	Organooxygen compounds	Carbohydrates and carbohydrate conjugates	71.4	-	ABC transporters	ABC transporters	1.0533	1.0543	1.1044	0.002146	0.006489	6.1655	6.2623	6.2054	5.7449	5.6506	5.4769
neg_6587	Phloretin	metab_18195	yes	up	C00774	neg	7507-89-3;60-82-2	273.077	4.53737	M-H	C15H14O5	55.7	-	LMPK12120525;HMDB0029646;HMDB0003306	-	-	map00941;map01110	Metabolism;Metabolism	Biosynthesis of other secondary metabolites;Global and overview maps	Organic oxygen compounds	Organooxygen compounds	Carbonyl compounds	55.7	-	Flavonoid biosynthesis;Biosynthesis of secondary metabolites	Flavonoid biosynthesis;Biosynthesis of secondary metabolites	1.5069	1.5051	1.4195	0.001888	0.005898	4.0491	4.1375	3.9339	2.5688	2.8743	3.0964
