# Supplementary material for: Metabolomics Reveals Antioxidant Metabolites in Colored Rice Grains
Source: Metabolites. 2024 Feb 11;14(2):120. doi: 10.3390/metabo14020120 (PMC10891847; doi:10.3390/metabo14020120)
Supplement: Supplementary file 1 [file metabolites-14-00120-s001.zip › Table S5.xls]

## Sheet: Difference between groups
Table S5. DM information of YZ6H and YCN1H comparison groups
ID	Metabolite	Metab ID	Significant	Regulate	KEGG Compound ID	Mode	CAS ID	M/Z	Retention time	Adducts	Formula	Fragmentation Score	Theoretical Fragmentation Score	Library ID	KEGG Compound First Category	KEGG Compound Second Category	KEGG Pathway ID	KEGG Pathway First Category	KEGG Pathway Second Category	HMDB Superclass	HMDB Class	HMDB Subclass	Fragmentation Score	Theoretical Fragmentation Score	KEGG Pathway Description	KEGG Pathway Description	VIP_pred_OPLS-DA	VIP_PLS-DA	FC(YZ6H/YCN1H)	P_value	FDR	YZ6H_1	YZ6H_2	YZ6H_3	YCN1H_1	YCN1H_2	YCN1H_3
pos_3	Gibberellin A14	metab_2	yes	up	C11858	pos	4955-22-0	349.201	3.13162	M+H, M+K, M+NH4, M+Na, 2M+NH4, 2M+Na, M+H-H2O, M+H-2H2O	C20H28O5	61.9	-	HMDB0303454;LMPR0104170015	-	-	map01100;map00904;map01110	Metabolism;Metabolism;Metabolism	Global and overview maps;Metabolism of terpenoids and polyketides;Global and overview maps	Lipids and lipid-like molecules	Prenol lipids	Diterpenoids	61.9	-	Metabolic pathways;Diterpenoid biosynthesis;Biosynthesis of secondary metabolites	Metabolic pathways;Diterpenoid biosynthesis;Biosynthesis of secondary metabolites	1.0676	1.0662	1.0762	0.01542	0.04276	6.4094	6.4959	6.1521	5.8446	5.8805	5.9814
pos_23	12-Oxo-20-carboxy-leukotriene B4	metab_22	yes	up	-	pos	-	387.178	2.92713	M+H, M+NH4, M+Na, M+H-H2O, M+H-2H2O	C20H28O6	-	65.6	HMDB0012550;LMFA03020047	-	-	-	-	-	Lipids and lipid-like molecules	Fatty Acyls	Fatty acids and conjugates	-	65.6	-	-	1.2036	1.2017	1.104	0.004603	0.019	5.8165	5.8892	5.6187	5.1334	5.2615	5.2978
pos_48	NORCANTHARIDIN	metab_47	yes	up	-	pos	-	151.039	1.83447	M+H, 2M+NH4, M+H-H2O, M+CH3OH+H	C8H8O4	49.9	-	-	-	-	-	-	-	-	-	-	49.9	-	-	-	1.3113	1.3093	1.1422	3.749e-05	0.001028	4.9145	4.9655	4.892	4.345	4.318	4.2705
pos_67	C9:2n-2,4	metab_66	yes	down	-	pos	-	155.107	7.81157	M+H, 2M+ACN+H, M+NH4, M+H-H2O	C9H14O2	68.7	-	LMFA01030450	-	-	-	-	-	-	-	-	68.7	-	-	-	1.0134	1.0125	0.921	0.01359	0.0391	4.7688	4.598	4.7217	5.2458	5.0861	4.9658
pos_76	Bicyclo-PGE2	metab_75	yes	up	-	pos	-	357.203	5.95508	M+H, M+K, 2M+Na, M+Na	C20H30O4	88.7	-	HMDB0060054;LMFA03010034	-	-	-	-	-	Lipids and lipid-like molecules	Fatty Acyls	Eicosanoids	88.7	-	-	-	1.2551	1.2535	1.1312	0.03022	0.06963	5.5665	5.9415	5.3881	4.753	5.0826	5.1015
pos_99	N-Acetyl-L-glutamate 5-semialdehyde	metab_97	yes	up	C01250	pos	13074-21-0	138.055	0.67	M+H-2H2O, M+H, M+CH3OH+H, M+NH4	C7H11NO4	-	65.3	HMDB0006488	-	-	map01100;map00220;map01110;map01210;map00330;map01230	Metabolism;Metabolism;Metabolism;Metabolism;Metabolism;Metabolism	Global and overview maps;Amino acid metabolism;Global and overview maps;Global and overview maps;Amino acid metabolism;Global and overview maps	Organic acids and derivatives	Carboxylic acids and derivatives	Amino acids, peptides, and analogues	-	65.3	Metabolic pathways;Arginine biosynthesis;Biosynthesis of secondary metabolites;2-Oxocarboxylic acid metabolism;Arginine and proline metabolism;Biosynthesis of amino acids	Metabolic pathways;Arginine biosynthesis;Biosynthesis of secondary metabolites;2-Oxocarboxylic acid metabolism;Arginine and proline metabolism;Biosynthesis of amino acids	1.2739	1.2729	1.1083	0.002503	0.01279	6.2289	5.987	6.2372	5.516	5.6188	5.5165
pos_143	3-amino-2-naphthoic acid	metab_141	yes	up	-	pos	-	188.071	1.92117	M+H, M+NH4, M+H-H2O	C11H9NO2	33.2	-	-	-	-	-	-	-	-	-	-	33.2	-	-	-	1.2907	1.2898	1.1101	0.007534	0.02613	6.5155	6.1802	6.5712	5.7158	5.8423	5.7979
pos_153	6-(4-ethyl-5-hydroxy-2-methoxyphenoxy)-3,4,5-trihydroxyoxane-2-carboxylic acid	metab_151	yes	up	-	pos	-	377.145	2.28422	M+H-2H2O, M+CH3OH+H, M+H-H2O	C15H20O9	-	44.9	-	-	-	-	-	-	-	-	-	-	44.9	-	-	1.1132	1.1117	1.1057	0.0001356	0.002228	4.6629	4.6058	4.6625	4.1637	4.2462	4.19
pos_158	Prunitrin	metab_156	yes	down	-	pos	154-36-9	429.118	2.47772	M+H-H2O, M+H, M+H-2H2O	C22H22O10	-	64.9	HMDB0034149	-	-	-	-	-	Phenylpropanoids and polyketides	Isoflavonoids	Isoflavonoid O-glycosides	-	64.9	-	-	2.5452	2.5416	0.0717	2.632e-06	0.0001749	0.182	0.1775	0.1734	2.3606	2.5486	2.5258
pos_165	(E)-2-Methyl-2-buten-1-ol O-beta-D-Glucopyranoside	metab_163	yes	up	-	pos	-	293.092	2.83688	M+Na, M+2Na-H, M+H-H2O	C11H20O6	-	57.9	HMDB0033064	-	-	-	-	-	Lipids and lipid-like molecules	Fatty Acyls	Fatty acyl glycosides	-	57.9	-	-	1.7485	1.7453	1.3367	0.002682	0.01328	4.4478	4.7929	4.2401	3.2684	3.4618	3.3556
pos_171	5-[(2,4,5-trihydroxyphenyl)methyl]oxolan-2-one	metab_169	yes	up	-	pos	-	207.065	3.01817	M+ACN+H, M+ACN+Na, M+H-H2O	C11H12O5	-	55.9	-	-	-	-	-	-	-	-	-	-	55.9	-	-	1.0144	1.0143	1.0772	0.01352	0.03894	5.6091	5.6841	5.6092	5.1791	5.1015	5.4096
pos_176	Methyl 3-(4-methoxyphenyl)-2-oxopropanoate	metab_174	yes	up	-	pos	-	209.081	3.17693	2M+H, 2M+NH4, M+H	C11H12O4	67.4	-	-	-	-	-	-	-	-	-	-	67.4	-	-	-	1.1417	1.1431	1.1124	0.03594	0.0795	5.4443	5.5135	5.3728	4.7702	4.6767	5.2337
pos_203	7-Epi-12-hydroxyjasmonic acid glucoside	metab_200	yes	up	-	pos	124649-25-8	389.181	4.15628	M+H, M+Na, M+NH4	C18H28O9	-	69.2	HMDB0040706	-	-	-	-	-	Lipids and lipid-like molecules	Fatty Acyls	Fatty acyl glycosides	-	69.2	-	-	2.4476	2.4444	1.8026	5.414e-05	0.0013	4.7202	4.6685	5.018	2.6524	2.5927	2.7468
pos_224	Phytosphingosine	metab_221	yes	up	C12144	pos	554-62-1	318.3	7.02868	M+H, M+Na, M+H-H2O	C18H39NO3	-	41.7	HMDB0004610;LMSP01030001	-	-	map00600;map01100	Metabolism;Metabolism	Lipid metabolism;Global and overview maps	Organic nitrogen compounds	Organonitrogen compounds	Amines	-	41.7	Sphingolipid metabolism;Metabolic pathways	Sphingolipid metabolism;Metabolic pathways	1.4306	1.4283	1.1182	5.948e-05	0.001353	6.8653	6.9927	6.8863	6.1626	6.2037	6.1871
pos_225	Cortol	metab_222	yes	up	C05482	pos	516-38-1	391.245	6.76637	M+H, M+Na, M+H-H2O	C21H36O5	-	35.3	LMST02030228;HMDB0003180	-	-	-	-	-	Lipids and lipid-like molecules	Steroids and steroid derivatives	Hydroxysteroids	-	35.3	-	-	1.3828	1.3804	1.1445	0.001328	0.008662	5.549	5.6374	5.4043	4.8119	4.9351	4.7478
pos_315	LPA(18:2(9Z,12Z)/0:0)	metab_312	yes	down	C00681	pos	-	435.25	7.8336	M+H, M+NH4, M+2Na-H	C21H39O7P	43.3	-	HMDB0007856;LMGP10050017;PW_C003907	-	-	map01100;map00564;map01110;map00561	Metabolism;Metabolism;Metabolism;Metabolism	Global and overview maps;Lipid metabolism;Global and overview maps;Lipid metabolism	Lipids and lipid-like molecules	Glycerophospholipids	Glycerophosphates	43.3	-	Metabolic pathways;Glycerophospholipid metabolism;Biosynthesis of secondary metabolites;Glycerolipid metabolism	Metabolic pathways;Glycerophospholipid metabolism;Biosynthesis of secondary metabolites;Glycerolipid metabolism	1.7228	1.7201	0.6992	0.002652	0.01324	2.8182	2.4075	2.4404	3.7606	3.4551	3.7466
pos_320	Methyl 9,10-epoxy-12,15-octadecadienoate	metab_317	yes	down	-	pos	-	309.242	7.89832	M+H-H2O, M+Na, M+H	C19H32O3	63.6	-	LMFA01070012	-	-	-	-	-	-	-	-	63.6	-	-	-	1.334	1.3349	0.8279	0.01643	0.04492	3.375	3.6551	3.1694	4.0918	3.9267	4.3015
pos_322	4-hydroxy Nonenal Alkyne	metab_319	yes	down	-	pos	-	194.115	7.81157	M+H, M+NH4, M+ACN+H	C9H12O2	76	-	-	-	-	-	-	-	-	-	-	76	-	-	-	1.0941	1.093	0.904	0.01066	0.03297	4.452	4.2643	4.3896	4.9889	4.8196	4.6898
pos_385	Isorhamnetin-3-O-glucoside	metab_382	yes	up	-	pos	-	501.1	3.40565	M+Na, M+K, M+H	C22H22O12	97.9	-	-	-	-	-	-	-	-	-	-	97.9	-	-	-	2.8643	2.8602	2.2096	3.69e-06	0.000211	5.2581	5.324	5.3876	2.3196	2.5529	2.3544
pos_409	Dryopteric acid	metab_405	yes	up	-	pos	-	349.092	2.77025	M+H, M+ACN+H, M+H-H2O	C17H16O8	39.3	-	LMPK12020078	-	-	-	-	-	-	-	-	39.3	-	-	-	1.4085	1.4066	1.2092	0.001317	0.008624	4.2333	4.1544	4.1821	3.3009	3.4927	3.6003
pos_410	1-O-E-Cinnamoyl-(6-arabinosylglucose)	metab_406	yes	up	-	pos	181373-66-0	460.181	2.68013	M+NH4, M+K, M+H-2H2O	C20H26O11	-	48.5	HMDB0030294	-	-	-	-	-	Phenylpropanoids and polyketides	Cinnamic acids and derivatives	Cinnamic acid esters	-	48.5	-	-	2.0502	2.0474	1.5316	0.0004097	0.004317	4.6443	4.2224	4.2366	2.8744	2.8115	2.8687
pos_422	D-(+)-Galactosamine	metab_418	yes	up	-	pos	-	180.087	2.32748	M+H, 2M+Na, 2M+NH4	C6H13NO5	55.8	-	-	-	-	-	-	-	-	-	-	55.8	-	-	-	1.2867	1.2848	1.1387	2.864e-06	0.000179	4.8163	4.8501	4.8141	4.2359	4.2229	4.2578
pos_423	3-O-Caffeoylshikimic acid	metab_419	yes	up	-	pos	6082-44-6	301.07	2.28422	M+H-2H2O, M+CH3OH+H, M+H-H2O	C16H16O8	-	75.7	HMDB0030654	-	-	-	-	-	Phenylpropanoids and polyketides	Cinnamic acids and derivatives	Hydroxycinnamic acids and derivatives	-	75.7	-	-	2.1071	2.1042	1.3306	5.628e-05	0.001308	6.3689	6.3478	6.4196	4.7666	4.6616	4.954
pos_424	Cyclomammeisin	metab_420	yes	down	-	pos	30563-62-3	445.161	2.26277	M+H, M+Na, M+H-H2O	C25H26O6	-	40	HMDB0030710	-	-	-	-	-	Phenylpropanoids and polyketides	Neoflavonoids	Prenylated neoflavonoids	-	40	-	-	1.4165	1.4159	0.7905	0.008905	0.0292	2.9257	2.9124	2.9002	3.8057	3.8855	3.3643
pos_434	Quercetin 3-beta-D-glucoside	metab_430	yes	up	C05623	pos	482-35-9	465.103	1.9002	M+H, M+Na, M+H-H2O	C21H20O12	44.1	-	HMDB0037362	-	-	map01100;map01110;map00944	Metabolism;Metabolism;Metabolism	Global and overview maps;Global and overview maps;Biosynthesis of other secondary metabolites	Phenylpropanoids and polyketides	Flavonoids	Flavonoid glycosides	44.1	-	Metabolic pathways;Biosynthesis of secondary metabolites;Flavone and flavonol biosynthesis	Metabolic pathways;Biosynthesis of secondary metabolites;Flavone and flavonol biosynthesis	2.3735	2.3701	1.826	2.306e-08	9.451e-06	4.3949	4.4198	4.4361	2.4029	2.4152	2.4377
pos_460	L-Valine	metab_456	yes	down	C00183	pos	72-18-4	118.086	0.6338	M+H, M+K, 2M+H	C5H11NO2	71.6	-	PW_C000704;HMDB0000883	Peptides	Amino acids	map01100;map01110;map00280;map01240;map01210;map00460;map02010;map01230;map00966;map00290;map00970;map00770	Metabolism;Metabolism;Metabolism;Metabolism;Metabolism;Metabolism;Environmental Information Processing;Metabolism;Metabolism;Metabolism;Genetic Information Processing;Metabolism	Global and overview maps;Global and overview maps;Amino acid metabolism;Global and overview maps;Global and overview maps;Metabolism of other amino acids;Membrane transport;Global and overview maps;Biosynthesis of other secondary metabolites;Amino acid metabolism;Translation;Metabolism of cofactors and vitamins	Organic acids and derivatives	Carboxylic acids and derivatives	Amino acids, peptides, and analogues	71.6	-	Metabolic pathways;Biosynthesis of secondary metabolites;Valine, leucine and isoleucine degradation;Biosynthesis of cofactors;2-Oxocarboxylic acid metabolism;Cyanoamino acid metabolism;ABC transporters;Biosynthesis of amino acids;Glucosinolate biosynthesis;Valine, leucine and isoleucine biosynthesis;Aminoacyl-tRNA biosynthesis;Pantothenate and CoA biosynthesis	Metabolic pathways;Biosynthesis of secondary metabolites;Valine, leucine and isoleucine degradation;Biosynthesis of cofactors;2-Oxocarboxylic acid metabolism;Cyanoamino acid metabolism;ABC transporters;Biosynthesis of amino acids;Glucosinolate biosynthesis;Valine, leucine and isoleucine biosynthesis;Aminoacyl-tRNA biosynthesis;Pantothenate and CoA biosynthesis	1.3848	1.3832	0.8899	0.001249	0.008325	5.6653	5.7157	5.6146	6.344	6.5163	6.2377
pos_606	(R)-b-amino-isobutyric acid	metab_601	yes	down	C01205	pos	-	104.071	0.6338	M+H-H2O, M+H	C4H9NO2	69.1	-	LMFA01100049	-	-	map00240;map01100;map00280	Metabolism;Metabolism;Metabolism	Nucleotide metabolism;Global and overview maps;Amino acid metabolism	-	-	-	69.1	-	Pyrimidine metabolism;Metabolic pathways;Valine, leucine and isoleucine degradation	Pyrimidine metabolism;Metabolic pathways;Valine, leucine and isoleucine degradation	1.6867	1.6845	0.8173	0.0001102	0.001977	4.6007	4.6281	4.4352	5.6013	5.6033	5.5135
pos_715	Cytosine	metab_709	yes	up	C00380	pos	71-30-7	112.051	1.01958	M+H, 2M+Na	C4H5N3O	58.3	-	HMDB0000630	Nucleic acids	Bases	map00240;map01100	Metabolism;Metabolism	Nucleotide metabolism;Global and overview maps	Organoheterocyclic compounds	Diazines	Pyrimidines and pyrimidine derivatives	58.3	-	Pyrimidine metabolism;Metabolic pathways	Pyrimidine metabolism;Metabolic pathways	1.0934	1.0918	1.1076	0.0004457	0.004538	4.3796	4.4787	4.4843	3.9946	3.993	4.0606
pos_742	Tetrahydro-2-methyl-3-furanol	metab_736	yes	down	-	pos	29848-44-0	120.102	0.6519	M+NH4, M+2Na-H	C5H10O2	-	48.9	HMDB0039799	-	-	-	-	-	Organoheterocyclic compounds	Tetrahydrofurans	Not Available	-	48.9	-	-	2.1934	2.1916	0.58	0.00496	0.0199	2.5151	2.5019	2.4897	4.7498	4.5096	3.6835
pos_840	1-Methyladenosine	metab_834	yes	up	C02494	pos	15763-06-1	282.12	1.62473	M+H, M+CH3OH+H	C11H15N5O4	56.3	-	HMDB0243935;HMDB0003331	-	-	-	-	-	Nucleosides, nucleotides, and analogues	Purine nucleosides	Not Available	56.3	-	-	-	1.2618	1.2601	1.1424	6.638e-06	0.0003113	4.5179	4.5301	4.5706	3.956	3.9869	3.9779
pos_844	3,7,3',4'-Tetrahydroxy-8-methoxyflavone	metab_838	yes	up	-	pos	-	317.066	1.64665	M+H-H2O, M+H	C16H12O7	43.2	-	LMPK12111607	-	-	-	-	-	-	-	-	43.2	-	-	-	2.4326	2.4289	2.4432	0.01824	0.04845	4.2563	3.8851	3.865	0.4463	2.357	2.111
pos_903	Oleoside dimethyl ester	metab_897	yes	up	-	pos	30164-95-5	436.181	1.79115	M+NH4, M+Na	C18H26O11	-	38.6	HMDB0031350	-	-	-	-	-	Lipids and lipid-like molecules	Prenol lipids	Terpene glycosides	-	38.6	-	-	1.442	1.4408	1.2018	0.002414	0.01252	4.7402	4.4094	4.591	3.8359	3.9003	3.6983
pos_904	4-Hydroxy-5-(3',4'-dihydroxyphenyl)-valeric acid-O-methyl-O-glucuronide	metab_898	yes	up	-	pos	-	452.176	1.79115	M+NH4, M+Na	C18H26O12	-	43.4	HMDB0059972	-	-	-	-	-	Organic oxygen compounds	Organooxygen compounds	Carbohydrates and carbohydrate conjugates	-	43.4	-	-	3.373	3.3689	30.5032	0.0003978	0.004247	4.8806	3.5809	4.2665	0.1348	0.1381	0.1444
pos_921	Procyanidin C1	metab_915	yes	down	C17624	pos	37064-30-5	867.212	1.83447	M+H, M+Na	C45H38O18	-	41.4	HMDB0038370	-	-	-	-	-	Phenylpropanoids and polyketides	Flavonoids	Biflavonoids and polyflavonoids	-	41.4	-	-	1.2506	1.2492	0.8457	0.02895	0.06764	3.203	3.7164	3.7175	4.0918	4.3747	4.1122
pos_939	3,4-Dimethoxyphenyl methyl ketone	metab_933	yes	up	-	pos	1131-62-0	181.086	1.9002	M+H-H2O, M+H	C10H12O3	82.4	-	HMDB0301758	-	-	-	-	-	Organic oxygen compounds	Organooxygen compounds	Carbonyl compounds	82.4	-	-	-	1.4316	1.4294	1.1935	0.0004706	0.004704	4.5211	4.6647	4.5095	3.9193	3.7486	3.8076
pos_941	Delphinidin	metab_935	yes	up	C05908	pos	13270-61-6;528-53-0	285.039	1.9002	M+H-H2O, M+H	C15H10O7	52.8	-	LMPK12010001;HMDB0003074	-	-	map00942;map00941;map01110	Metabolism;Metabolism;Metabolism	Biosynthesis of other secondary metabolites;Biosynthesis of other secondary metabolites;Global and overview maps	Phenylpropanoids and polyketides	Flavonoids	Hydroxyflavonoids	52.8	-	Anthocyanin biosynthesis;Flavonoid biosynthesis;Biosynthesis of secondary metabolites	Anthocyanin biosynthesis;Flavonoid biosynthesis;Biosynthesis of secondary metabolites	3.4779	3.4729	7.1188	1.289e-09	1.806e-06	4.9773	4.9771	5.0199	0.6885	0.6984	0.7165
pos_964	Citrusin E	metab_958	yes	down	-	pos	134860-03-0	395.131	1.98207	M+Na, M+K	C17H24O9	-	56.9	HMDB0039234	-	-	-	-	-	Organic oxygen compounds	Organooxygen compounds	Carbohydrates and carbohydrate conjugates	-	56.9	-	-	1.7185	1.7167	0.757	0.002057	0.01136	3.559	3.3385	3.2696	4.3503	4.3524	4.7274
pos_988	3,4-Dihydroxybenzaldehyde	metab_982	yes	up	C16700	pos	139-85-5	139.039	2.0689	M+H-H2O, M+H	C7H6O3	39.3	-	HMDB0059965	-	-	map00950	Metabolism	Biosynthesis of other secondary metabolites	Organic oxygen compounds	Organooxygen compounds	Carbonyl compounds	39.3	-	Isoquinoline alkaloid biosynthesis	Isoquinoline alkaloid biosynthesis	1.1212	1.1202	1.1241	0.003599	0.01614	4.3262	4.1057	4.3357	3.7884	3.7596	3.8114
pos_994	Kynurenic acid	metab_988	yes	down	C01717	pos	492-27-3	222.076	2.13353	M+H, M+CH3OH+H	C10H7NO3	62.5	-	PW_C000566;HMDB0000715	-	-	map01100;map00380	Metabolism;Metabolism	Global and overview maps;Amino acid metabolism	Organoheterocyclic compounds	Quinolines and derivatives	Quinoline carboxylic acids	62.5	-	Metabolic pathways;Tryptophan metabolism	Metabolic pathways;Tryptophan metabolism	1.7187	1.7174	0.7407	0.001949	0.01102	3.22	3.2231	2.8707	4.1262	4.0706	4.3787
pos_1003	Butyl 3-O-caffeoylquinate	metab_997	yes	down	-	pos	132741-56-1	393.152	2.17605	M+H-H2O, M+ACN+Na	C20H26O9	-	52.9	HMDB0034588	-	-	-	-	-	Organic oxygen compounds	Organooxygen compounds	Alcohols and polyols	-	52.9	-	-	1.0613	1.0611	0.8887	0.007285	0.02559	3.4684	3.5592	3.3027	3.797	3.8884	3.9354
pos_1004	Carboxybupranolol, 4-chloro-3-[3-(1,1-dimethylethylamino)-2-hydroxy-propyloxy]benzoic acid	metab_998	yes	down	-	pos	-	319.14	2.17605	M+H, M+NH4	C14H20ClNO4	-	37.4	HMDB0061131	-	-	-	-	-	Benzenoids	Benzene and substituted derivatives	Benzoic acids and derivatives	-	37.4	-	-	1.686	1.6843	0.6426	0.004749	0.01934	2.117	2.081	1.5668	3.1109	2.9005	2.9619
pos_1022	Sambucus nigra Degraded cyanogenic glycosides (2'-Epimer)	metab_1016	yes	down	-	pos	-	417.118	2.26277	M+H-H2O, M+ACN+Na	C16H19NO8	-	48.5	HMDB0035502	-	-	-	-	-	Organic oxygen compounds	Organooxygen compounds	Carbohydrates and carbohydrate conjugates	-	48.5	-	-	1.2961	1.2942	0.7906	1.208e-06	0.00011	2.2627	2.2495	2.2374	2.8321	2.8663	2.8402
pos_1035	Zingerone	metab_1029	yes	up	C17497	pos	122-48-5	195.102	2.32748	M+H, M+NH4	C11H14O3	77.8	-	HMDB0032590	-	-	-	-	-	Benzenoids	Phenols	Methoxyphenols	77.8	-	-	-	1.3804	1.3786	1.1636	1.479e-05	0.0005374	4.8218	4.7891	4.8573	4.1653	4.1607	4.108
pos_1057	Gly Val Leu	metab_1051	yes	up	-	pos	-	288.192	2.3692	M+H, M+Na	C13H25N3O4	40.4	-	-	-	-	-	-	-	-	-	-	40.4	-	-	-	1.0144	1.0152	1.1183	0.02405	0.05926	3.9179	3.9097	4.0512	3.552	3.7237	3.346
pos_1069	2-[2,4,6-trihydroxy-3-(3-methylbut-2-en-1-yl)phenyl]acetic acid	metab_1063	yes	up	-	pos	-	235.096	2.47772	M+H-H2O, M+NH4	C13H16O5	-	53.5	-	-	-	-	-	-	-	-	-	-	53.5	-	-	1.3626	1.3608	1.2071	0.0001503	0.002354	3.9568	3.8411	3.8308	3.2598	3.1784	3.1945
pos_1073	(S)-Edulinine	metab_1067	yes	up	-	pos	27495-36-9	330.11	2.5	M+K, M+ACN+Na	C16H21NO4	-	74.2	HMDB0030178	-	-	-	-	-	Organoheterocyclic compounds	Quinolines and derivatives	Quinolones and derivatives	-	74.2	-	-	1.7255	1.7241	1.4066	0.003773	0.01666	3.8435	3.9408	3.7566	2.5972	2.5223	3.0841
pos_1086	Epi-4'-hydroxyjasmonic acid	metab_1080	yes	up	-	pos	-	227.128	2.54483	M+H-H2O, M+H	C12H18O4	31.5	-	LMFA02020008	-	-	-	-	-	-	-	-	31.5	-	-	-	1.6271	1.6247	1.2029	8.689e-07	8.903e-05	5.5521	5.6037	5.5488	4.6215	4.637	4.6273
pos_1098	4'-O-Methyl-(-)-epicatechin 3'-O-glucuronide	metab_1092	yes	up	-	pos	-	481.134	2.58998	M+H, M+K	C22H24O12	-	38	HMDB0041674	-	-	-	-	-	Phenylpropanoids and polyketides	Flavonoids	Flavonoid glycosides	-	38	-	-	1.9925	1.99	1.4485	0.0002713	0.003419	4.6168	4.5651	4.6545	3.1732	2.99	3.3898
pos_1124	Morin 3,7,4'-trimethyl ether 2'-glucoside	metab_1118	yes	up	-	pos	-	507.15	2.70265	M+H, M+CH3OH+H	C24H26O12	48	-	LMPK12112511	-	-	-	-	-	-	-	-	48	-	-	-	1.8018	1.8001	1.358	0.002602	0.01308	4.6515	4.4948	4.5413	3.202	3.1712	3.7072
pos_1127	(7'x,8'x)-4,7'-Epoxy-3,8'-bilign-7-ene-3,5'-dimethoxy-4',9,9'-triol	metab_1121	yes	up	-	pos	-	359.149	2.72525	M+H-2H2O, M+H	C20H22O6	37.1	-	HMDB0041276	-	-	-	-	-	Phenylpropanoids and polyketides	2-arylbenzofuran flavonoids	Not Available	37.1	-	-	-	1.2344	1.2363	1.2786	0.04553	0.09513	2.8364	3.0366	3.1875	2.5409	2.5931	1.9514
pos_1141	5-O-Methylvisamminol	metab_1135	yes	up	C09016	pos	80681-42-1	273.112	2.77025	M+H-H2O, M+H	C16H18O5	31.5	-	LMPK13110002	-	-	-	-	-	-	-	-	31.5	-	-	-	2.209	2.2059	1.6703	1.628e-05	0.0005736	4.2713	4.3153	4.392	2.5425	2.5151	2.711
pos_1162	1-Methylestra-1,3,5(10),6-tetraene-3,17beta-diol	metab_1155	yes	up	C15255	pos	-	285.185	2.81553	M+H, M+NH4	C19H24O2	62.8	-	-	-	-	-	-	-	-	-	-	62.8	-	-	-	1.1227	1.1212	1.1074	0.005522	0.0214	4.9065	5.0323	4.7905	4.3449	4.4298	4.5269
pos_1165	5''-(4-Hydroxy-(E)-cinnamoyl) alpha-L-arabinofuranosyl-(1->3)-beta-D-xylopyranosyl-(1->4)-D-xylopyranoside	metab_1158	yes	up	-	pos	102254-69-3	599.14	2.83688	M+Na, M+K	C24H32O15	-	54.9	HMDB0041489	-	-	-	-	-	Organic oxygen compounds	Organooxygen compounds	Carbohydrates and carbohydrate conjugates	-	54.9	-	-	1.8984	1.8966	1.3057	0.002641	0.01321	5.6159	5.8168	5.6738	4.3106	4.0677	4.7233
pos_1181	Nafenopin	metab_1174	yes	up	C11371	pos	3771-19-5	311.164	2.90442	M+H-H2O, M+H	C20H22O3	43.2	-	HMDB0255421	-	-	-	-	-	Benzenoids	Benzene and substituted derivatives	Phenoxyacetic acid derivatives	43.2	-	-	-	1.2969	1.2945	1.1445	0.002549	0.01293	4.98	5.0174	4.7799	4.2069	4.4004	4.3043
pos_1182	3-hydroxy-3-methyl-4-phenylbutan-2-one	metab_1175	yes	up	-	pos	-	220.133	2.88232	M+ACN+H, 2M+H	C11H14O2	-	30.3	-	-	-	-	-	-	-	-	-	-	30.3	-	-	1.5628	1.5612	1.3157	0.003656	0.0163	3.7769	3.8254	3.8021	2.9499	2.6067	3.1117
pos_1207	Echinone	metab_1200	yes	up	C10338	pos	80348-65-8	345.133	2.99538	M+H-H2O, M+H	C19H20O6	36.1	-	-	-	-	-	-	-	-	-	-	36.1	-	-	-	1.7776	1.7757	1.3513	0.003887	0.017	4.4358	4.3483	4.8566	3.1487	3.5599	3.3865
pos_1226	4R,5R,6S-Trihydroxy-2-hydroxymethyl-2-cyclohexen-1-one 6-(2-hydroxy-6-methylbenzoate)	metab_1219	yes	up	-	pos	146475-71-0	331.081	3.06402	M+Na, 2M+Na	C15H16O7	-	53.4	HMDB0040692	-	-	-	-	-	Benzenoids	Benzene and substituted derivatives	Benzoic acids and derivatives	-	53.4	-	-	1.5653	1.5627	1.2058	0.001503	0.009301	5.2317	5.4634	5.0706	4.3374	4.3369	4.4003
pos_1233	3-Methoxy-4-hydroxyphenylethylene glycol	metab_1226	yes	up	-	pos	-	167.07	3.10927	M+H-H2O, 2M+H	C9H12O4	48.8	-	-	-	-	-	-	-	-	-	-	48.8	-	-	-	2.073	2.0698	1.4029	2.042e-05	0.0006759	5.3529	5.4091	5.2183	3.7744	3.7537	3.8636
pos_1268	2,3-Diketo-13,14-dihydro-PGF1a	metab_1261	yes	up	-	pos	-	367.211	3.24553	M+H, M+Na	C20H30O6	84.6	-	-	-	-	-	-	-	-	-	-	84.6	-	-	-	1.1904	1.1878	1.1423	0.03792	0.08281	4.7285	5.1657	4.5573	4.1148	4.3659	4.1714
pos_1269	4-hydroxy-7-methyl-5H-furo[2,3-g]isochromen-5-one	metab_1262	yes	up	-	pos	-	249.076	3.24553	M+H, M+CH3OH+H	C12H8O4	-	33.6	-	-	-	-	-	-	-	-	-	-	33.6	-	-	1.2447	1.2455	1.1744	0.02756	0.06543	4.3395	4.3287	4.22	3.447	3.5009	4.0253
pos_1276	Phlorizin	metab_1269	yes	up	C01604	pos	60-81-1	437.144	3.26842	M+H-H2O, M+H	C21H24O10	-	68.8	HMDB0036634	-	-	map00941;map01110	Metabolism;Metabolism	Biosynthesis of other secondary metabolites;Global and overview maps	Phenylpropanoids and polyketides	Flavonoids	Flavonoid glycosides	-	68.8	Flavonoid biosynthesis;Biosynthesis of secondary metabolites	Flavonoid biosynthesis;Biosynthesis of secondary metabolites	1.5001	1.498	1.2132	0.0003814	0.004134	4.5994	4.6172	4.6277	3.666	3.8307	3.9143
pos_1277	20-Oxo-leukotriene E4	metab_1270	yes	up	-	pos	-	454.226	3.26842	M+H, M+Na	C23H35NO6S	-	33.5	HMDB0012642;LMFA03020065	-	-	-	-	-	Lipids and lipid-like molecules	Fatty Acyls	Eicosanoids	-	33.5	-	-	1.3274	1.3258	1.2195	0.04776	0.09828	4.1411	4.7387	3.8562	3.3328	3.5204	3.5886
pos_1281	Citromitin	metab_1274	yes	up	-	pos	-	437.181	3.2912	M+H-H2O, M+CH3OH+H	C21H24O8	-	37	HMDB0037313	-	-	-	-	-	Phenylpropanoids and polyketides	Flavonoids	O-methylated flavonoids	-	37	-	-	1.2882	1.2866	1.1433	0.0033	0.01516	4.9467	4.9498	4.9004	4.4247	4.1205	4.3977
pos_1294	Hyperoside	metab_1287	yes	up	C10073	pos	482-36-0	465.103	3.13162	M+H, M+Na	C21H20O12	92.6	-	HMDB0030775	-	-	-	-	-	Phenylpropanoids and polyketides	Flavonoids	Flavonoid glycosides	92.6	-	-	-	3.5878	3.5827	7.0256	3.273e-08	1.207e-05	5.2956	5.2768	5.4	0.7448	0.755	0.7737
pos_1299	3,4,5-trihydroxy-6-[(4-oxo-2-phenyl-4H-chromen-3-yl)oxy]oxane-2-carboxylic acid	metab_1292	yes	up	-	pos	-	447.128	3.36	M+H, M+CH3OH+H	C21H18O9	-	40.4	-	-	-	-	-	-	-	-	-	-	40.4	-	-	1.6256	1.6238	1.4828	0.00162	0.00977	2.9909	2.7669	3.1802	1.9577	1.97	2.1005
pos_1304	Gamma-Glutamyl-S-methylcysteinyl-beta-alanine	metab_1297	yes	up	-	pos	102148-91-4	377.15	3.38282	M+ACN+H, 2M+ACN+H	C12H21N3O6S	-	47.6	HMDB0039504	-	-	-	-	-	Organic acids and derivatives	Peptidomimetics	Hybrid peptides	-	47.6	-	-	1.6226	1.6199	1.2707	0.005652	0.02161	4.4671	5.0206	4.5229	3.7469	3.5708	3.7083
pos_1310	4-hydroxy-5-(4-hydroxy-3-methoxyphenyl)pentanoic acid	metab_1303	yes	up	-	pos	-	263.091	3.40565	M+H, M+Na	C12H16O5	-	43.8	-	-	-	-	-	-	-	-	-	-	43.8	-	-	1.0675	1.0661	1.109	0.001371	0.008808	4.2885	4.2686	4.1727	3.7939	3.7822	3.9033
pos_1321	6-(4-ethenyl-3-hydroxyphenoxy)-3,4,5-trihydroxyoxane-2-carboxylic acid	metab_1314	yes	up	-	pos	-	313.092	3.47398	M+H-H2O, M+H	C14H16O8	-	35	-	-	-	-	-	-	-	-	-	-	35	-	-	2.2377	2.2343	1.517	2.783e-06	0.0001768	5.1699	5.2739	5.2072	3.4236	3.5059	3.3872
pos_1327	Lirioresinol A	metab_1320	yes	up	-	pos	21453-71-4	419.17	3.49672	M+H-2H2O, M+H	C22H26O8	40.2	-	HMDB0038928	-	-	-	-	-	Lignans, neolignans and related compounds	Furanoid lignans	Not Available	40.2	-	-	-	1.4535	1.4545	1.2267	0.03175	0.07222	4.8135	4.7755	4.7124	3.8342	3.4447	4.3781
pos_1381	5-Deoxykievitol	metab_1374	yes	up	-	pos	104380-54-3	357.133	3.76948	M+H-H2O, M+H	C20H20O6	38.1	-	HMDB0038774;LMPK12050460	-	-	-	-	-	Phenylpropanoids and polyketides	Isoflavonoids	Isoflavans	38.1	-	-	-	1.4052	1.4034	1.2182	0.002302	0.01218	4.0809	4.0035	4.1268	3.1514	3.3856	3.4864
pos_1409	5-Hydroxy-7-(4-hydroxy-3-methoxyphenyl)-1-phenyl-3-heptanone	metab_1402	yes	up	-	pos	79559-61-8	311.164	3.9292	M+H-H2O, M+Na	C20H24O4	-	63	HMDB0029524	-	-	-	-	-	Phenylpropanoids and polyketides	Diarylheptanoids	Linear diarylheptanoids	-	63	-	-	1.7195	1.7168	1.3313	0.001417	0.009003	4.3624	4.4256	4.2442	3.1612	3.5149	3.1118
pos_1440	Idebenone	metab_1433	yes	up	-	pos	-	361.199	4.17895	M+H, M+Na	C19H30O5	62.6	-	HMDB0253376	-	-	-	-	-	Not Available	Not Available	Not Available	62.6	-	-	-	1.2767	1.2747	1.1604	0.008149	0.02754	4.4786	4.753	4.3302	3.8405	3.8985	3.9503
pos_1466	(2S,4S,6S)-2-[2-(4-Hydroxy-3-meyhoxyphenyl)ethyl]tetrahydro-6-(4,5-dihydroxy-3-methoxyphenyl)-2H-pyran-4-yl 4-acetate	metab_1459	yes	up	-	pos	182227-92-5	433.186	4.38253	M+H, M+Na	C23H28O8	-	36.5	HMDB0030503	-	-	-	-	-	Phenylpropanoids and polyketides	Diarylheptanoids	Linear diarylheptanoids	-	36.5	-	-	3.2632	3.2582	8.7687	2.493e-05	0.0007892	4.4261	4.4754	3.9376	0.4775	0.4858	0.5011
pos_1467	Gibberellin A2	metab_1460	yes	up	-	pos	-	351.18	4.15628	M+H, M+Na	C19H26O6	84.1	-	LMPR0104070003	-	-	-	-	-	-	-	-	84.1	-	-	-	1.334	1.3329	1.193	0.009089	0.02959	4.2312	4.426	4.0478	3.4955	3.4197	3.7349
pos_1474	Pindone	metab_1467	yes	up	C19141	pos	83-26-1	231.101	4.45065	M+H-H2O, M+H	C14H14O3	63.7	-	HMDB0256560	-	-	-	-	-	Benzenoids	Indanes	Indanones	63.7	-	-	-	1.8231	1.8208	1.6628	0.001166	0.007955	3.0757	3.0489	3.0047	2.1203	1.6743	1.6961
pos_1504	1-(2-Furanyl)-2-propanone	metab_1497	yes	up	-	pos	6975-60-6	107.049	3.9292	M+H-H2O, M+ACN+Na	C7H8O2	-	42.5	HMDB0032917	-	-	-	-	-	Organoheterocyclic compounds	Heteroaromatic compounds	Not Available	-	42.5	-	-	1.3745	1.3724	1.1887	8.462e-06	0.0003736	4.2449	4.2473	4.1901	3.529	3.5742	3.5643
pos_1510	6''-O-Acetylglycitin	metab_1503	yes	up	-	pos	134859-96-4	521.165	3.0411	M+H, M+CH3OH+H	C24H24O11	-	76.3	HMDB0039489	-	-	-	-	-	Phenylpropanoids and polyketides	Isoflavonoids	Isoflavonoid O-glycosides	-	76.3	-	-	1.9281	1.9251	1.6417	0.01267	0.03719	3.9749	3.5352	3.6508	1.7127	2.7912	2.295
pos_1534	(all-E)-Crocetin	metab_1527	yes	up	-	pos	27876-94-4	329.175	5.03568	M+H-H2O, M+H	C20H24O4	43.1	-	HMDB0035098	-	-	-	-	-	Lipids and lipid-like molecules	Prenol lipids	Diterpenoids	43.1	-	-	-	1.3267	1.3273	1.2025	0.03587	0.07943	4.5025	4.6566	4.0622	3.5066	3.5067	3.9826
pos_1668	15-Hydroxyleptocarpin	metab_1661	yes	up	-	pos	121541-07-9	401.158	2.95002	M+H-2H2O, M+Na	C20H26O7	-	55	HMDB0036694	-	-	-	-	-	Lipids and lipid-like molecules	Prenol lipids	Terpene lactones	-	55	-	-	1.6046	1.6024	1.2288	5.386e-05	0.0013	4.9278	4.9164	4.9603	3.9275	4.0246	4.0959
pos_1697	PGF2alpha methyl ester	metab_1690	yes	up	-	pos	-	351.253	6.48265	M+H-H2O, M+Na	C21H36O5	31.8	-	LMFA03010115	-	-	-	-	-	-	-	-	31.8	-	-	-	1.1644	1.1623	1.112	0.001307	0.00858	4.9114	5.0082	4.8284	4.4275	4.4748	4.3601
pos_1711	19(20)-EpDPE	metab_1704	yes	up	-	pos	-	362.267	6.61318	M+H, M+NH4	C22H32O3	-	54.9	HMDB0013620;LMFA04000038	-	-	-	-	-	Lipids and lipid-like molecules	Fatty Acyls	Lineolic acids and derivatives	-	54.9	-	-	1.3394	1.3378	1.1617	0.001999	0.01114	4.9247	4.6176	4.7021	4.1047	4.0858	4.0718
pos_1732	Beta-D-Glucopyranosyl-11-hydroxyjasmonic acid	metab_1725	yes	up	-	pos	-	411.163	2.54483	M+Na, M+K	C18H28O9	-	48	HMDB0039964	-	-	-	-	-	Lipids and lipid-like molecules	Fatty Acyls	Fatty acyl glycosides	-	48	-	-	2.1635	2.1603	1.4912	1.617e-05	0.0005734	4.9965	5.1083	5.0682	3.3892	3.2908	3.496
pos_1737	Yucalexin P21	metab_1730	yes	up	-	pos	119626-54-9	322.274	6.85378	M+NH4, M+Na	C20H32O2	-	71.4	HMDB0036754	-	-	-	-	-	Lipids and lipid-like molecules	Prenol lipids	Diterpenoids	-	71.4	-	-	1.2009	1.2003	1.1371	0.009115	0.02962	4.7837	4.4146	4.6379	4.0525	4.1413	3.9757
pos_1739	3,4,5-trihydroxy-6-[3-(2-phenylcyclobutyl)phenoxy]oxane-2-carboxylic acid	metab_1732	yes	up	-	pos	-	401.16	2.5	M+H-H2O, M+H	C22H24O7	-	30.2	-	-	-	-	-	-	-	-	-	-	30.2	-	-	1.837	1.8348	1.3346	0.0007393	0.006185	4.8806	4.9223	4.8544	3.6406	3.4474	3.8961
pos_1747	C17 Sphinganine	metab_1740	yes	up	-	pos	-	288.29	6.9634	M+H-H2O, M+H	C17H37NO2	42.8	-	LMSP01040003	-	-	-	-	-	-	-	-	42.8	-	-	-	1.6949	1.6924	1.3028	0.00104	0.007478	4.3915	4.6456	4.4765	3.2851	3.4672	3.6223
pos_1796	Dihydroceramide	metab_1789	yes	up	C12126	pos	2304-80-5	330.3	7.2911	M+H-H2O, M+H	C19H39NO3	33.9	-	HMDB0011761;PW_C002905;HMDB0006752	-	-	map00600;map01100	Metabolism;Metabolism	Lipid metabolism;Global and overview maps	Lipids and lipid-like molecules	Sphingolipids	Ceramides	33.9	-	Sphingolipid metabolism;Metabolic pathways	Sphingolipid metabolism;Metabolic pathways	1.1581	1.1566	1.093	0.01269	0.03724	6.4105	6.0727	6.0325	5.6799	5.6601	5.6013
pos_1816	Sterol	metab_1809	yes	down	C00370	pos	-	249.221	7.39763	M+H-H2O, M+H	C17H28O	34.2	-	HMDB0060512	-	-	-	-	-	Lipids and lipid-like molecules	Steroids and steroid derivatives	Hydroxysteroids	34.2	-	-	-	1.0572	1.056	0.9041	0.006728	0.02409	4.0217	4.0236	3.9976	4.329	4.6002	4.3901
pos_1937	13(S)-HODE methyl ester	metab_1930	yes	down	-	pos	-	311.258	8.30415	M+H-H2O, M+H	C19H34O3	66.5	-	-	-	-	-	-	-	-	-	-	66.5	-	-	-	1.488	1.4862	0.8137	0.0003816	0.004134	3.4804	3.5989	3.3915	4.3333	4.3242	4.2085
pos_2108	Neoannonin B	metab_2101	yes	up	-	pos	170312-94-4	629.475	9.58627	M+H-H2O, M+Na	C37H66O6	-	60.1	HMDB0037117	-	-	-	-	-	Lipids and lipid-like molecules	Fatty Acyls	Fatty alcohols	-	60.1	-	-	1.0952	1.0944	1.0989	0.01357	0.03907	5.1924	5.2926	5.2068	4.8044	4.9197	4.5562
pos_2135	Cer(d16:1(4E)/20:0(2OH))	metab_2128	yes	up	-	pos	-	582.545	10.097	M+H-H2O, M+H	C36H71NO4	43.2	-	LMSP02010084	-	-	-	-	-	-	-	-	43.2	-	-	-	2.0841	2.081	1.4667	0.0001654	0.002547	4.8604	5.0047	4.8129	3.5054	3.1656	3.3367
pos_2140	GPCho(17:1/17:1)	metab_2133	yes	up	-	pos	-	758.569	10.2922	M+H, M+Na	C42H80NO8P	50.8	-	-	-	-	-	-	-	-	-	-	50.8	-	-	-	1.0376	1.0382	1.0697	0.03046	0.06995	6.8401	6.8771	6.8544	6.3865	6.1865	6.6558
pos_2158	PE-NMe2(15:0/22:5(7Z,10Z,13Z,16Z,19Z))	metab_2151	yes	up	C04308	pos	-	780.552	9.67072	M+H, M+Na	C44H78NO8P	-	37.8	PW_C059952;HMDB0113936	-	-	map01100;map00564;map01110	Metabolism;Metabolism;Metabolism	Global and overview maps;Lipid metabolism;Global and overview maps	Lipids and lipid-like molecules	Glycerophospholipids	Glycerophosphoethanolamines	-	37.8	Metabolic pathways;Glycerophospholipid metabolism;Biosynthesis of secondary metabolites	Metabolic pathways;Glycerophospholipid metabolism;Biosynthesis of secondary metabolites	1.1447	1.1441	1.0975	0.009218	0.02989	5.6219	5.7626	5.6671	5.1703	5.0122	5.3541
pos_2463	Histidinal	metab_2456	yes	down	C01929	pos	23784-15-8	122.071	0.6338	M+H-H2O	C6H9N3O	-	54.6	HMDB0012234	-	-	map01100;map00340;map01110	Metabolism;Metabolism;Metabolism	Global and overview maps;Amino acid metabolism;Global and overview maps	Organic nitrogen compounds	Organonitrogen compounds	Amines	-	54.6	Metabolic pathways;Histidine metabolism;Biosynthesis of secondary metabolites	Metabolic pathways;Histidine metabolism;Biosynthesis of secondary metabolites	1.0138	1.0129	0.9205	0.0007878	0.006379	4.3142	4.3472	4.2876	4.6653	4.6412	4.7619
pos_2469	Thiamine	metab_2462	yes	down	C00378	pos	70-16-6;59-43-8	265.112	0.6338	M+H	C12H16N4OS	60.6	-	HMDB0302835;HMDB0000235;PW_C000158;HMDB0303167	Vitamins and cofactors	Vitamins	map01100;map00730;map04122;map02010;map01240	Metabolism;Metabolism;Genetic Information Processing;Environmental Information Processing;Metabolism	Global and overview maps;Metabolism of cofactors and vitamins;Folding, sorting and degradation;Membrane transport;Global and overview maps	Organoheterocyclic compounds	Diazines	Pyrimidines and pyrimidine derivatives	60.6	-	Metabolic pathways;Thiamine metabolism;Sulfur relay system;ABC transporters;Biosynthesis of cofactors	Metabolic pathways;Thiamine metabolism;Sulfur relay system;ABC transporters;Biosynthesis of cofactors	1.1017	1.1005	0.9088	0.0004869	0.004854	4.3785	4.4058	4.3125	4.8116	4.7454	4.8552
pos_2519	Trigonelline	metab_2512	yes	up	C01004	pos	535-83-1	138.055	0.879233	M+H	C7H7NO2	60.6	-	HMDB0000875	-	-	map00760	Metabolism	Metabolism of cofactors and vitamins	Alkaloids and derivatives	Not Available	Not Available	60.6	-	Nicotinate and nicotinamide metabolism	Nicotinate and nicotinamide metabolism	1.385	1.3838	1.1302	0.0009805	0.007274	6.1155	5.9172	6.1702	5.371	5.4107	5.3255
pos_2552	Niacinamide	metab_2545	yes	down	C00153	pos	98-92-0	123.055	0.957567	M+H	C6H6N2O	62	-	HMDB0001406;PW_C001086	Vitamins and cofactors	Vitamins	map01100;map00760;map01240	Metabolism;Metabolism;Metabolism	Global and overview maps;Metabolism of cofactors and vitamins;Global and overview maps	Organoheterocyclic compounds	Pyridines and derivatives	Pyridinecarboxylic acids and derivatives	62	-	Metabolic pathways;Nicotinate and nicotinamide metabolism;Biosynthesis of cofactors	Metabolic pathways;Nicotinate and nicotinamide metabolism;Biosynthesis of cofactors	1.0692	1.0688	0.8961	0.006104	0.02269	3.6855	3.8071	3.7145	4.1766	4.0388	4.2919
pos_2659	5-Hydroxymethyl-4-methyluracil	metab_2652	yes	down	-	pos	147-61-5	121.04	1.41967	M+H-2H2O	C6H8N2O3	-	39	HMDB0000544	-	-	-	-	-	Organoheterocyclic compounds	Diazines	Pyrimidines and pyrimidine derivatives	-	39	-	-	1.1977	1.1964	0.8522	0.03233	0.07321	3.6948	3.2627	3.3886	3.8097	4.0561	4.2759
pos_2698	Cysteinyl-Threonine	metab_2691	yes	down	-	pos	-	205.064	1.54082	M+H-H2O	C7H14N2O4S	-	45.8	HMDB0028785	-	-	-	-	-	Organic acids and derivatives	Carboxylic acids and derivatives	Amino acids, peptides, and analogues	-	45.8	-	-	2.4432	2.4392	0.3964	0.005247	0.02068	2.0869	0.7528	1.5958	3.9501	3.6946	3.5415
pos_2705	3-Indolebutyric acid	metab_2698	yes	down	C11284	pos	133-32-4	221.128	1.56168	M+NH4	C12H13NO2	-	53.2	HMDB0002096	-	-	-	-	-	Organoheterocyclic compounds	Indoles and derivatives	Indoles	-	53.2	-	-	1.0111	1.0094	0.9273	0.0002451	0.003223	4.7309	4.6362	4.684	5.0534	5.0297	5.0693
pos_2749	PC(4:0/0:0)	metab_2742	yes	up	-	pos	-	328.151	1.68488	M+H	C12H26NO7P	69.2	-	LMGP01050061	-	-	-	-	-	-	-	-	69.2	-	-	-	1.0893	1.0867	1.1426	0.04564	0.09529	4.0972	4.3611	3.8511	3.5959	3.7637	3.4135
pos_2775	Okanin	metab_2768	yes	up	C08724	pos	484-76-4	289.071	1.76857	M+H	C15H12O6	68.5	-	LMPK12120181;HMDB0245776	-	-	-	-	-	Phenylpropanoids and polyketides	Linear 1,3-diarylpropanoids	Chalcones and dihydrochalcones	68.5	-	-	-	2.451	2.4471	2.2057	0.0006515	0.005769	4.0706	4.1042	3.7632	1.5891	2.2001	1.6232
pos_2827	6-O-b-D-Fructofuranosyl-2-deoxy-D-glucose	metab_2820	yes	up	-	pos	57440-92-3	653.255	1.92117	2M+H	C12H22O10	-	31.3	HMDB0040154	-	-	-	-	-	Organic oxygen compounds	Organooxygen compounds	Carbohydrates and carbohydrate conjugates	-	31.3	-	-	2.4713	2.4689	1.8524	0.002168	0.01173	5.3552	4.2784	5.0556	2.6269	2.6393	2.6618
pos_2828	5-Hydroxy-2-(1-hydroxy-5-methyl-4-hexenyl)benzofuran	metab_2821	yes	up	-	pos	197971-79-2	264.159	1.94112	M+NH4	C15H18O3	-	67.4	HMDB0031916	-	-	-	-	-	Organoheterocyclic compounds	Benzofurans	Not Available	-	67.4	-	-	3.7292	3.7237	17.8092	6.488e-08	2.081e-05	5.223	5.3153	5.142	0.2857	0.2918	0.3029
pos_2832	Cyanin	metab_2825	yes	up	C08639	pos	20905-74-2	611.161	1.94112	M+H	C27H30O16	47.3	-	HMDB0304306;LMPK12010113	-	-	map00942	Metabolism	Biosynthesis of other secondary metabolites	Phenylpropanoids and polyketides	Flavonoids	Flavonoid glycosides	47.3	-	Anthocyanin biosynthesis	Anthocyanin biosynthesis	3.1022	3.0987	2.3008	0.002873	0.01389	6.3519	6.2052	6.3976	3.1906	1.66	3.3861
pos_2835	Adipoyl-CoA	metab_2828	yes	up	C14143	pos	25119-42-0	913.201	1.94112	M+NH4	C27H44N7O19P3S	-	40.5	LMFA07050284;HMDB0004047	-	-	map01100	Metabolism	Global and overview maps	Lipids and lipid-like molecules	Fatty Acyls	Fatty acyl thioesters	-	40.5	Metabolic pathways	Metabolic pathways	3.2292	3.2248	2.6955	1.592e-06	0.0001292	5.8713	5.751	6.0377	2.2063	2.1617	2.1841
pos_2842	Trans-Grandmarin	metab_2835	yes	up	-	pos	119239-48-4	648.205	1.96328	2M+ACN+Na	C15H16O6	-	43.1	HMDB0039030	-	-	-	-	-	Phenylpropanoids and polyketides	Coumarins and derivatives	Pyranocoumarins	-	43.1	-	-	1.8678	1.8664	1.431	0.0132	0.03834	5.0695	3.9585	4.6073	3.1604	3.1728	3.1954
pos_2867	Trans-Zeatin-riboside	metab_2860	yes	up	-	pos	-	352.161	2.08933	M+H	C15H21N5O5	60.4	-	-	-	-	-	-	-	-	-	-	60.4	-	-	-	2.0241	2.0214	1.713	1.377e-05	0.0005104	3.5785	3.3989	3.5312	2.0271	2.0257	2.0823
pos_2868	Luteolin-7-O-glucoside	metab_2861	yes	up	-	pos	-	449.108	2.08933	M+H	C21H20O11	85	-	-	-	-	-	-	-	-	-	-	85	-	-	-	2.784	2.7801	1.5243	2.599e-06	0.0001743	7.9918	7.9707	8.0413	5.365	5.2501	5.1311
pos_2873	Caffeine	metab_2866	yes	down	C07481	pos	1958-08-02	195.088	2.13353	M+H	C8H10N4O2	90.5	-	HMDB0001847;PW_C001222	-	-	map01100;map01110;map00232	Metabolism;Metabolism;Metabolism	Global and overview maps;Global and overview maps;Biosynthesis of other secondary metabolites	Organoheterocyclic compounds	Imidazopyrimidines	Purines and purine derivatives	90.5	-	Metabolic pathways;Biosynthesis of secondary metabolites;Caffeine metabolism	Metabolic pathways;Biosynthesis of secondary metabolites;Caffeine metabolism	1.3492	1.3471	0.8253	0.001485	0.009238	3.302	3.0479	3.104	3.7771	3.7828	3.8933
pos_2874	6''-O-(3-Hydroxy-3-methylglutaroyl)astragalin	metab_2867	yes	up	-	pos	157407-84-6	625.175	2.15398	M+CH3OH+H	C27H28O15	-	72.8	HMDB0041129	-	-	-	-	-	Phenylpropanoids and polyketides	Flavonoids	Flavonoid glycosides	-	72.8	-	-	2.8463	2.8424	2.1848	4.824e-06	0.000253	5.3423	5.2062	5.3775	2.5588	2.3241	2.4063
pos_2878	1-Methyl-1,3-cyclohexadiene	metab_2871	yes	down	-	pos	1489-56-1	95.086	2.19847	M+H	C7H10	-	30.2	HMDB0031532	-	-	-	-	-	Hydrocarbons	Unsaturated hydrocarbons	Branched unsaturated hydrocarbons	-	30.2	-	-	1.0844	1.0829	0.8905	0.001026	0.007435	3.5541	3.4478	3.4435	3.9498	3.9395	3.8411
pos_2896	4,7-dioxo-octanoic acid	metab_2889	yes	down	-	pos	-	173.081	2.26277	M+H	C8H12O4	73.7	-	LMFA01060156	-	-	-	-	-	-	-	-	73.7	-	-	-	1.1396	1.139	0.8841	0.009949	0.03151	3.8698	3.7035	3.9101	4.3623	4.4645	4.1627
pos_2903	Hydroxyprolyl-Tyrosine	metab_2896	yes	down	-	pos	-	259.108	2.28422	M+H-2H2O	C14H18N2O5	-	45.6	HMDB0028875	-	-	-	-	-	Organic acids and derivatives	Carboxylic acids and derivatives	Amino acids, peptides, and analogues	-	45.6	-	-	1.753	1.7509	0.7504	0.002203	0.01182	3.2057	3.5462	3.4771	4.322	4.7529	4.5566
pos_2917	Quercetin 3,7-dimethyl ether 5-glucoside	metab_2910	yes	up	-	pos	128388-46-5	493.134	2.32748	M+H	C23H24O12	56	-	HMDB0039336;LMPK12112710	-	-	-	-	-	Phenylpropanoids and polyketides	Flavonoids	Flavonoid glycosides	56	-	-	-	1.7432	1.741	1.3012	0.001327	0.008662	5.0607	4.6367	4.7027	3.7636	3.6098	3.6926
pos_2918	Stachyoside A	metab_2911	yes	down	-	pos	131862-10-7	571.163	2.32748	M+2Na-H	C21H34O15	-	73	HMDB0039092	-	-	-	-	-	Lipids and lipid-like molecules	Prenol lipids	Terpene glycosides	-	73	-	-	1.2968	1.2952	0.8835	0.003705	0.01641	4.8419	4.6818	4.7592	5.368	5.2398	5.5577
pos_2922	Eugenitol	metab_2915	yes	up	-	pos	491-48-5	224.092	2.34803	M+NH4	C11H10O4	-	74.1	HMDB0029466	-	-	-	-	-	Organoheterocyclic compounds	Benzopyrans	1-benzopyrans	-	74.1	-	-	1.2053	1.2035	1.1637	0.0003151	0.003743	3.7581	3.6857	3.708	3.1158	3.2427	3.2247
pos_2925	Xanthotoxol glucoside	metab_2918	yes	up	-	pos	-	751.15	2.34803	2M+Na	C17H16O9	-	67.1	HMDB0038626	-	-	-	-	-	Phenylpropanoids and polyketides	Coumarins and derivatives	Coumarin glycosides	-	67.1	-	-	3.6517	3.6464	5.0944	1.468e-09	1.806e-06	5.8669	5.8698	5.9166	1.1401	1.1516	1.1726
pos_2927	13-Hydroxy-5'-O-methylmelledonal	metab_2920	yes	up	-	pos	112471-06-4	480.223	2.3692	M+NH4	C24H30O9	-	76.7	HMDB0035864	-	-	-	-	-	Lipids and lipid-like molecules	Prenol lipids	Sesquiterpenoids	-	76.7	-	-	2.397	2.3937	1.7641	4.929e-05	0.001245	4.7601	4.6775	4.7609	2.57	2.5824	2.8963
pos_2941	Vitisin B	metab_2934	yes	up	-	pos	-	581.151	2.41213	M+ACN+Na	C25H25O12+	-	57.6	HMDB0036825	-	-	-	-	-	Organoheterocyclic compounds	Pyrrolidines	Phenylpyrrolidines	-	57.6	-	-	1.3852	1.3837	1.1809	0.004791	0.01949	4.7923	4.6825	4.667	3.7759	4.0051	4.1952
pos_2949	Estriol-16-Glucuronide	metab_2942	yes	up	C05504	pos	1852-50-2	482.238	2.43397	M+NH4	C24H32O9	-	56.7	HMDB0006766	-	-	-	-	-	Lipids and lipid-like molecules	Steroids and steroid derivatives	Steroidal glycosides	-	56.7	-	-	2.1147	2.1117	1.3975	1.283e-05	0.0004827	5.5235	5.6432	5.6039	4.0941	3.979	3.9255
pos_2953	Pro Val Leu	metab_2946	yes	down	-	pos	-	328.223	2.45618	M+H	C16H29N3O4	79.1	-	-	-	-	-	-	-	-	-	-	79.1	-	-	-	1.8665	1.8647	0.6059	0.003428	0.01557	1.8211	2.3813	1.796	3.3351	3.4256	3.1359
pos_2960	Val Val Ile	metab_2953	yes	down	-	pos	-	330.239	2.47772	M+H	C16H31N3O4	87.2	-	-	-	-	-	-	-	-	-	-	87.2	-	-	-	1.5246	1.5233	0.7192	0.003108	0.0146	2.0953	2.483	2.07	3.1273	3.0589	3.0563
pos_2984	Demethylsulochrin	metab_2977	yes	up	C15504	pos	-	319.081	2.58998	M+H	C16H14O7	59.1	-	-	-	-	-	-	-	-	-	-	59.1	-	-	-	2.0735	2.0705	1.3926	1.516e-06	0.0001285	5.4221	5.3748	5.4436	3.8471	3.94	3.8743
pos_3005	Vanillylmandelic acid	metab_2998	yes	up	C05584	pos	13244-77-4;55-10-7	181.05	2.68013	M+H-H2O	C9H10O5	36.1	-	HMDB0304531;HMDB0000291;HMDB0254548;PW_C000197	-	-	map01100;map00350	Metabolism;Metabolism	Global and overview maps;Amino acid metabolism	Benzenoids	Phenols	Methoxyphenols	36.1	-	Metabolic pathways;Tyrosine metabolism	Metabolic pathways;Tyrosine metabolism	1.4758	1.4735	1.2066	7.224e-05	0.001545	4.5749	4.5884	4.4647	3.7316	3.751	3.8121
pos_3006	1,1'-(Tetrahydro-6a-hydroxy-2,3a,5-trimethylfuro[2,3-d]-1,3-dioxole-2,5-diyl)bis-ethanone	metab_2999	yes	up	-	pos	18114-49-3	241.107	2.68013	M+H-H2O	C12H18O6	-	79.9	HMDB0032527	-	-	-	-	-	Organic oxygen compounds	Organooxygen compounds	Ethers	-	79.9	-	-	1.8776	1.8748	1.4008	4.872e-06	0.0002531	4.4287	4.3905	4.3098	3.1022	3.1493	3.1198
pos_3022	(E)-1-O-Cinnamoyl-beta-D-glucose	metab_3015	yes	up	-	pos	40004-96-4	621.216	2.72525	2M+H	C15H18O7	-	60	HMDB0030293	-	-	-	-	-	Phenylpropanoids and polyketides	Cinnamic acids and derivatives	Cinnamic acid esters	-	60	-	-	1.4146	1.413	1.1882	0.001534	0.009405	4.6904	4.6096	4.6016	3.9325	3.729	4.0393
pos_3030	Blumealactone A	metab_3023	yes	up	-	pos	111545-46-1	428.205	2.74753	M+ACN+Na	C20H28O6	-	65	HMDB0036665	-	-	-	-	-	Lipids and lipid-like molecules	Prenol lipids	Monoterpenoids	-	65	-	-	1.5815	1.5789	1.26	0.001231	0.008243	4.4586	4.5361	4.2764	3.5946	3.5898	3.3483
pos_3034	DL-3,4-Dihydroxymandelic acid	metab_3027	yes	up	-	pos	-	167.034	2.77025	M+H-H2O	C8H8O5	57.9	-	-	-	-	-	-	-	-	-	-	57.9	-	-	-	1.6306	1.6286	1.2903	6.757e-05	0.001475	4.2398	4.1244	4.3042	3.2474	3.3058	3.2662
pos_3058	(+)-Galbacin	metab_3051	yes	up	C10616	pos	61891-31-4	341.138	2.83688	M+H	C20H20O5	40.7	-	-	-	-	-	-	-	-	-	-	40.7	-	-	-	1.1301	1.1288	1.1312	0.000289	0.003571	3.9934	3.8845	3.9965	3.499	3.5193	3.4778
pos_3077	Marmesin rutinoside	metab_3070	yes	up	-	pos	159650-11-0	555.206	2.88232	M+H	C26H34O13	-	62	HMDB0041413	-	-	-	-	-	Phenylpropanoids and polyketides	Coumarins and derivatives	Furanocoumarins	-	62	-	-	2.5857	2.5828	1.9862	0.001027	0.007438	4.861	4.9695	4.8884	2.3411	2.0575	3.0122
pos_3090	(3xi,6E)-1,7-Diphenyl-6-hepten-3-ol	metab_3083	yes	up	-	pos	87095-76-9	267.174	2.92713	M+H	C19H22O	43.9	-	HMDB0030146	-	-	-	-	-	Phenylpropanoids and polyketides	Diarylheptanoids	Linear diarylheptanoids	43.9	-	-	-	1.2596	1.2578	1.1431	0.003727	0.01649	4.7556	4.8572	4.5786	4.0484	4.132	4.2346
pos_3125	Cuneatin methyl ether	metab_3118	yes	up	-	pos	-	327.086	3.0411	M+H	C18H14O6	52.4	-	LMPK12050088	-	-	-	-	-	-	-	-	52.4	-	-	-	1.9694	1.9689	10.1594	0.01822	0.04841	2.0917	0.917	2.1543	0.1643	0.1683	0.1757
pos_3173	Acteoside	metab_3166	yes	up	C10501	pos	61276-17-3	669.181	3.2	M+2Na-H	C29H36O15	-	49.8	HMDB0259785;HMDB0034843	-	-	-	-	-	Phenylpropanoids and polyketides	Cinnamic acids and derivatives	Hydroxycinnamic acids and derivatives	-	49.8	-	-	2.4191	2.4159	1.6229	0.0003343	0.003852	5.4814	5.5861	5.4076	3.4943	3.0379	3.6205
pos_3177	Oenin	metab_3170	yes	up	C12140	pos	30113-37-2;7228-78-6	493.134	3.22275	M+H	C23H24O12	86	-	HMDB0038010;HMDB0030777;LMPK12010372	-	-	map00942	Metabolism	Biosynthesis of other secondary metabolites	Phenylpropanoids and polyketides	Flavonoids	Flavonoid glycosides	86	-	Anthocyanin biosynthesis	Anthocyanin biosynthesis	1.3828	1.3805	1.1547	0.0007786	0.006347	5.168	5.3137	5.0601	4.4799	4.4609	4.5198
pos_3189	5-(3,4,5-trihydroxyphenyl)pentanoic acid	metab_3182	yes	up	-	pos	-	475.158	3.26842	2M+Na	C11H14O5	-	32.8	-	-	-	-	-	-	-	-	-	-	32.8	-	-	1.3734	1.3717	1.1983	0.0008276	0.006598	4.1025	4.0886	4.2288	3.3754	3.4131	3.5751
pos_3190	11-Oxo-androsterone glucuronide	metab_3183	yes	up	-	pos	-	513.269	3.26842	M+CH3OH+H	C25H36O9	-	52.1	HMDB0010338;LMST05010032	-	-	-	-	-	Lipids and lipid-like molecules	Glycerolipids	Diradylglycerols	-	52.1	-	-	1.0433	1.0414	1.132	0.02403	0.05923	3.6465	4.0442	3.7021	3.3267	3.3715	3.366
pos_3202	Neobanone	metab_3195	yes	up	-	pos	-	383.112	3.3141	M+H	C21H18O7	34.5	-	LMPK12060036	-	-	-	-	-	-	-	-	34.5	-	-	-	1.7759	1.774	1.4783	0.002709	0.01335	3.6878	3.6389	3.5043	2.1831	2.3852	2.7567
pos_3204	Persiconin	metab_3197	yes	up	-	pos	28978-03-2	443.133	3.3141	M+H-2H2O	C23H26O11	-	84	HMDB0037482;LMPK12140586	-	-	-	-	-	Phenylpropanoids and polyketides	Flavonoids	Flavonoid glycosides	-	84	-	-	1.4292	1.4277	1.2481	0.00712	0.02522	3.8407	3.7356	4.1951	3.0302	3.1462	3.2569
pos_3214	4',5,6-Trimethylscutellarein 7-glucoside	metab_3207	yes	up	-	pos	17680-85-2	473.142	3.33705	M+H-H2O	C24H26O11	-	46.1	HMDB0040512	-	-	-	-	-	Benzenoids	Anthracenes	Anthraquinones	-	46.1	-	-	1.4371	1.4356	1.1932	0.001018	0.007421	4.6082	4.5355	4.7893	3.8335	3.9801	3.8621
pos_3218	Benzylmalic acid	metab_3211	yes	up	-	pos	-	225.076	3.36	M+H	C11H12O5	49.1	-	-	-	-	-	-	-	-	-	-	49.1	-	-	-	1.3566	1.355	1.1644	0.0006549	0.005773	4.7083	4.7058	4.7577	4.0155	3.9669	4.1886
pos_3275	Fluocinolone Acetonide	metab_3268	yes	up	-	pos	-	475.194	3.5649	M+Na	C24H30F2O6	-	62.9	-	-	-	-	-	-	-	-	-	-	62.9	-	-	1.5704	1.5678	1.2242	0.0009181	0.007029	4.9304	5.0181	4.7315	3.8842	4.0559	4.0505
pos_3293	Trans-o-Coumaric acid 2-glucoside	metab_3286	yes	up	C05158	pos	618-67-7	309.097	3.65617	M+H-H2O	C15H18O8	-	87.3	HMDB0033581	-	-	map00940;map01110	Metabolism;Metabolism	Biosynthesis of other secondary metabolites;Global and overview maps	Organic oxygen compounds	Organooxygen compounds	Carbohydrates and carbohydrate conjugates	-	87.3	Phenylpropanoid biosynthesis;Biosynthesis of secondary metabolites	Phenylpropanoid biosynthesis;Biosynthesis of secondary metabolites	1.8002	1.7978	1.5274	0.0002026	0.002841	3.3597	3.4262	3.3188	2.1152	2.1276	2.3728
pos_3311	N-cis-Feruloyltyramine	metab_3304	yes	up	-	pos	80510-09-4	314.139	3.7017	M+H	C18H19NO4	42.9	-	HMDB0036381	-	-	-	-	-	Phenylpropanoids and polyketides	Cinnamic acids and derivatives	Hydroxycinnamic acids and derivatives	42.9	-	-	-	2.4433	2.4423	1.9252	0.01043	0.03252	4.6433	4.8918	4.91	2.3583	1.712	3.4318
pos_3444	Gladiatoside C2	metab_3437	yes	up	-	pos	-	549.137	4.47343	M+H-H2O	C29H26O12	-	36.6	HMDB0036254	-	-	-	-	-	Phenylpropanoids and polyketides	Flavonoids	Flavonoid glycosides	-	36.6	-	-	1.3928	1.3916	1.3163	0.002687	0.01328	3.0178	2.9266	3.0208	2.4723	2.2083	2.1283
pos_3492	4-Hydroxyderricin	metab_3485	yes	up	-	pos	-	339.159	4.8821	M+H	C21H22O4	32.1	-	LMPK12120041;HMDB0246454	-	-	-	-	-	Phenylpropanoids and polyketides	Linear 1,3-diarylpropanoids	Chalcones and dihydrochalcones	32.1	-	-	-	2.5837	2.5819	2.6387	0.005262	0.02071	4.1158	4.095	3.9489	2.0287	1.9484	0.6312
pos_3748	Palmyrolide A	metab_3741	yes	up	-	pos	-	338.267	6.56863	M+H	C20H35NO3	55.1	-	-	-	-	-	-	-	-	-	-	55.1	-	-	-	1.1821	1.1809	1.1106	0.00194	0.01102	5.2699	5.0328	5.2064	4.6438	4.6655	4.6562
pos_3783	L-Palmitoylcarnitine	metab_3776	yes	down	C02990	pos	2364-67-2	364.321	6.76637	M+H-2H2O	C23H45NO4	-	72.2	LMFA07070079;HMDB0000222;PW_C000147;HMDB0240774;LMFA07070004	-	-	map01212;map00071	Metabolism;Metabolism	Global and overview maps;Lipid metabolism	Lipids and lipid-like molecules	Fatty Acyls	Fatty acid esters	-	72.2	Fatty acid metabolism;Fatty acid degradation	Fatty acid metabolism;Fatty acid degradation	1.7083	1.7069	0.6754	0.004113	0.01764	2.2866	2.2734	2.2613	3.4512	3.6369	3.013
pos_3848	4-Hydroxyretinoic acid	metab_3841	yes	down	C16677	pos	66592-72-1	650.441	7.13862	2M+NH4	C20H28O3	-	75.1	HMDB0006254;PW_C002690	-	-	map01100	Metabolism	Global and overview maps	Lipids and lipid-like molecules	Prenol lipids	Retinoids	-	75.1	Metabolic pathways	Metabolic pathways	1.0828	1.0853	0.8767	0.04791	0.09846	3.5009	3.9322	3.4447	4	4.0892	4.3203
pos_3883	Ciprostene	metab_3876	yes	down	-	pos	-	365.268	7.2911	M+H	C22H36O4	62.9	-	HMDB0250270	-	-	-	-	-	Lipids and lipid-like molecules	Fatty Acyls	Eicosanoids	62.9	-	-	-	1.5696	1.5674	0.8124	1.775e-05	0.0006034	3.8288	3.7877	3.7802	4.6094	4.7063	4.7114
pos_3888	Sterebin E	metab_3881	yes	up	-	pos	114343-74-7	371.279	7.31217	M+CH3OH+H	C20H34O4	-	64.1	HMDB0035379	-	-	-	-	-	Lipids and lipid-like molecules	Prenol lipids	Diterpenoids	-	64.1	-	-	1.0361	1.0353	1.1036	0.02591	0.06258	4.7531	4.6953	4.5823	4.2257	4.4455	4.0413
pos_4230	Alpha-Amyrone	metab_4223	yes	down	-	pos	638-96-0	425.377	9.22197	M+H	C30H48O	52.7	-	HMDB0036659	-	-	-	-	-	Lipids and lipid-like molecules	Prenol lipids	Triterpenoids	52.7	-	-	-	1.3469	1.3449	0.8797	3.926e-05	0.001046	4.6987	4.7172	4.7493	5.4056	5.3105	5.3891
pos_4881	PC(16:0/18:1(11Z))	metab_4874	yes	up	C00157	pos	-	760.584	10.7684	M+H	C42H82NO8P	-	71.4	PW_C004020;LMGP01010576;HMDB0007971	Lipids	Phospholipids	map01100;map00564;map01110;map00590;map00591;map00592	Metabolism;Metabolism;Metabolism;Metabolism;Metabolism;Metabolism	Global and overview maps;Lipid metabolism;Global and overview maps;Lipid metabolism;Lipid metabolism;Lipid metabolism	Lipids and lipid-like molecules	Glycerophospholipids	Glycerophosphocholines	-	71.4	Metabolic pathways;Glycerophospholipid metabolism;Biosynthesis of secondary metabolites;Arachidonic acid metabolism;Linoleic acid metabolism;alpha-Linolenic acid metabolism	Metabolic pathways;Glycerophospholipid metabolism;Biosynthesis of secondary metabolites;Arachidonic acid metabolism;Linoleic acid metabolism;alpha-Linolenic acid metabolism	1.3876	1.3862	1.1199	0.00405	0.01751	6.7156	6.7209	6.7658	6.0738	5.7806	6.1846
pos_4904	GPCho(18:1/18:2)	metab_4897	yes	up	-	pos	17041-44-0	806.566	10.2702	M+Na	C44H82NO8P	81.8	-	HMDB0008072;HMDB0011310;HMDB0011244;HMDB0013425;HMDB0013429;HMDB0008105	-	-	-	-	-	Lipids and lipid-like molecules	Glycerophospholipids	Glycerophosphocholines	81.8	-	-	-	1.0299	1.0296	1.0713	0.01599	0.04408	6.3404	6.2959	6.3441	5.9191	5.72	6.0788
pos_4938	Cer(d16:2(4E,6E)/20:0(2OH))	metab_4931	yes	up	-	pos	-	580.53	9.92393	M+H	C36H69NO4	90.3	-	LMSP02010089	-	-	-	-	-	-	-	-	90.3	-	-	-	1.831	1.8285	1.3023	0.0003846	0.004154	5.2488	5.2602	5.1043	4.0409	3.8092	4.1376
pos_4958	DG(18:3(9Z,12Z,15Z)/16:0/0:0)	metab_4951	yes	up	C00165	pos	-	591.498	9.71402	M+H	C37H66O5	73.6	-	PW_C003352;HMDB0007301	-	-	-	-	-	Lipids and lipid-like molecules	Fatty Acyls	Lineolic acids and derivatives	73.6	-	-	-	1.1022	1.1002	1.115	0.02958	0.06856	4.8662	5.0483	4.6909	4.4205	4.5254	4.152
pos_5414	LysoPA(16:0/0:0)	metab_5407	yes	up	C04036	pos	-	393.24	8.30415	M+H-H2O	C19H39O7P	-	39.6	HMDB0007853	-	-	-	-	-	Lipids and lipid-like molecules	Glycerophospholipids	Glycerophosphates	-	39.6	-	-	1.2284	1.2267	1.1136	0.0004316	0.004472	5.4111	5.3221	5.2952	4.7364	4.7943	4.8641
pos_5491	Val His Pro Leu	metab_5484	yes	up	-	pos	-	465.282	8.07045	M+H	C22H36N6O5	53.2	-	-	-	-	-	-	-	-	-	-	53.2	-	-	-	1.811	1.8101	1.7841	0.01028	0.03214	2.6645	2.6776	3.3333	1.9593	1.441	1.4627
pos_5692	Hydroxyprolyl-Threonine	metab_5685	yes	down	-	pos	-	250.141	7.48398	M+NH4	C9H16N2O5	-	42.9	HMDB0028873	-	-	-	-	-	Organic acids and derivatives	Carboxylic acids and derivatives	Amino acids, peptides, and analogues	-	42.9	-	-	1.1528	1.1512	0.8777	0.01221	0.03626	3.8983	3.5333	3.7211	4.3288	4.2443	4.1352
pos_5776	Sphinganine	metab_5769	yes	up	C00836	pos	764-22-7	302.305	7.2911	M+H	C18H39NO2	92	-	LMSP01020001;HMDB0242634;HMDB0000269;PW_C000184	-	-	map00600;map01100	Metabolism;Metabolism	Lipid metabolism;Global and overview maps	Organic nitrogen compounds	Organonitrogen compounds	Amines	92	-	Sphingolipid metabolism;Metabolic pathways	Sphingolipid metabolism;Metabolic pathways	1.1387	1.1366	1.0911	0.002309	0.01218	5.6369	5.8415	5.698	5.2302	5.3118	5.1992
pos_5792	CAY10408	metab_5785	yes	up	-	pos	-	393.261	7.24683	M+H	C23H36O5	30.7	-	-	-	-	-	-	-	-	-	-	30.7	-	-	-	1.0281	1.0269	1.0785	0.01745	0.04694	5.8407	5.7907	5.6795	5.3236	5.5283	5.1968
pos_5961	6-hydroxysphingosine	metab_5954	yes	up	-	pos	-	316.284	6.65675	M+H	C18H37NO3	56.3	-	LMSP01080003	-	-	-	-	-	-	-	-	56.3	-	-	-	1.1607	1.1593	1.0887	0.0006072	0.005578	5.9764	5.9479	6.0109	5.4468	5.5833	5.4422
pos_5975	Alpha-Linolenoyl Ethanolamide	metab_5968	yes	up	C13828	pos	-	322.274	6.61318	M+H	C20H35NO2	81	-	HMDB0013624	-	-	-	-	-	Organic nitrogen compounds	Organonitrogen compounds	Amines	81	-	-	-	1.3553	1.354	1.1649	0.003243	0.01502	5.0142	4.6788	4.8022	4.1811	4.2073	4.0559
pos_6214	8,13-dihydroxy-9,11-octadecadienoic acid	metab_6207	yes	down	-	pos	-	313.237	5.76187	M+H	C18H32O4	83.7	-	LMFA02000166	-	-	-	-	-	-	-	-	83.7	-	-	-	1.357	1.356	0.862	0.005969	0.02235	4.4054	4.3074	4.3646	5.0552	5.2794	4.8365
pos_6245	(2Z,6E)-3,7,11,15,19-Pentamethyl-2,6-eicosadien-1-ol	metab_6238	yes	down	-	pos	26549-03-1	387.358	5.65583	M+Na	C25H48O	-	34.4	HMDB0035154	-	-	-	-	-	Lipids and lipid-like molecules	Prenol lipids	Sesterterpenoids	-	34.4	-	-	1.7239	1.721	0.7253	0.01397	0.0399	2.9637	2.6751	3.6139	4.2841	4.2862	4.1851
pos_6254	Feruperine	metab_6247	yes	down	-	pos	77795-15-4	252.138	5.63333	M+H-2H2O	C17H21NO3	-	47.4	HMDB0040699	-	-	-	-	-	Benzenoids	Phenols	Methoxyphenols	-	47.4	-	-	1.8388	1.8413	0.6024	0.0405	0.08687	2.199	2.1858	2.1736	2.9923	3.3172	4.5761
pos_6421	3b,5a,6b-Cholestanetriol	metab_6413	yes	down	-	pos	1253-84-5	385.342	5.07925	M+H-2H2O	C27H48O3	-	45.2	HMDB0003990	-	-	-	-	-	Lipids and lipid-like molecules	Glycerophospholipids	Glycerophosphoethanolamines	-	45.2	-	-	1.9951	1.9917	0.653	0.0006936	0.005992	2.7159	2.4736	2.9526	4.0404	4.1678	4.2603
pos_6428	N-3-oxo-hexadec-11(Z)-enoyl-L-Homoserine lactone	metab_6420	yes	up	-	pos	-	352.247	5.03568	M+H	C20H33NO4	32.9	-	-	-	-	-	-	-	-	-	-	32.9	-	-	-	1.0117	1.0107	1.1033	0.004572	0.0189	4.1793	3.981	4.1469	3.6646	3.7371	3.7514
pos_6503	Dihydroactinidiolide	metab_6494	yes	up	-	pos	15356-74-8	181.122	4.81433	M+H	C11H16O2	82.1	-	HMDB0035240	-	-	-	-	-	Organoheterocyclic compounds	Benzofurans	Not Available	82.1	-	-	-	1.0777	1.0767	1.1045	0.002528	0.01287	4.5078	4.4609	4.6596	4.0808	4.1543	4.1035
pos_6510	Palmitoylglycine	metab_6501	yes	down	-	pos	158305-64-7	331.295	4.76915	M+NH4	C18H35NO3	-	32.9	HMDB0013034	-	-	-	-	-	Organic acids and derivatives	Carboxylic acids and derivatives	Amino acids, peptides, and analogues	-	32.9	-	-	2.8878	2.8834	0.1763	0.004236	0.01798	1.7296	0.1398	0.1365	3.6916	3.8809	3.8078
pos_6523	Palmitoleoyl Ethanolamide	metab_6514	yes	down	-	pos	94421-67-7	315.3	4.72365	M+NH4	C18H35NO2	-	44	HMDB0013648	-	-	-	-	-	Organic nitrogen compounds	Organonitrogen compounds	Amines	-	44	-	-	1.5875	1.5893	0.6742	0.04296	0.09091	2.2519	2.2387	2.2266	3.23	2.7308	4.001
pos_6577	Ax-4''-Hydroxy-3-'-methoxymaysin	metab_6568	yes	up	-	pos	169132-06-3	557.165	4.47343	M+H-2H2O	C28H32O14	-	62.3	HMDB0030238	-	-	-	-	-	Phenylpropanoids and polyketides	Flavonoids	Flavonoid glycosides	-	62.3	-	-	1.6376	1.636	1.2278	0.008011	0.02719	5.4277	5.7251	5.4522	4.644	4.1389	4.7401
pos_6578	Methyl 3,4-dicaffeoylquinate	metab_6569	yes	up	-	pos	345642-66-2	527.155	4.47343	M+H-H2O	C27H28O12	-	45.6	HMDB0037093	-	-	-	-	-	Organic oxygen compounds	Organooxygen compounds	Alcohols and polyols	-	45.6	-	-	1.4877	1.4855	1.2687	0.0001192	0.002065	3.7055	3.8006	3.7149	3.0358	2.8992	2.91
pos_6602	Malvidin	metab_6593	yes	up	C08716	pos	643-84-5	331.081	4.40528	M+H	C17H14O7	76	-	LMPK12010004	-	-	-	-	-	-	-	-	76	-	-	-	1.9375	1.9343	1.3284	0.0007799	0.00635	5.6114	5.6415	5.2734	4.126	4.3117	4.0029
pos_6618	Norfluoxetine	metab_6609	yes	up	-	pos	83891-03-6	337.154	4.33707	M+ACN+H	C16H16F3NO	-	38.8	PW_C040649;HMDB0060551	-	-	-	-	-	Benzenoids	Benzene and substituted derivatives	Trifluoromethylbenzenes	-	38.8	-	-	1.3071	1.3056	1.1691	0.001874	0.0108	4.3137	4.4176	4.3116	3.6051	3.6829	3.8701
pos_6636	Negletein 6-[rhamnosyl-(1->2)-fucoside]	metab_6627	yes	up	C10023	pos	192224-98-9	621.15	4.26888	M+2Na-H	C28H32O13	-	91.8	HMDB0031991	-	-	-	-	-	Organoheterocyclic compounds	Benzopyrans	1-benzopyrans	-	91.8	-	-	1.3907	1.3885	1.1909	0.0001338	0.002214	4.3322	4.3896	4.2295	3.609	3.6214	3.644
pos_6668	5,7-Dihydroxy-3-methoxyflavone	metab_6659	yes	up	C11577	pos	6665-74-3	317.102	4.15628	M+CH3OH+H	C16H12O5	-	30.1	HMDB0029522;LMPK12111654	-	-	-	-	-	Phenylpropanoids and polyketides	Flavonoids	O-methylated flavonoids	-	30.1	-	-	2.6779	2.6744	2.8031	0.005071	0.02018	4.1063	4.6322	3.8585	0.6748	1.7106	2.1087
pos_6689	Dorsteniol	metab_6680	yes	up	-	pos	80794-85-0	263.091	4.11113	M+H	C14H14O5	36.2	-	HMDB0032838	-	-	-	-	-	Phenylpropanoids and polyketides	Coumarins and derivatives	Furanocoumarins	36.2	-	-	-	1.9755	1.9728	1.5088	0.000712	0.006067	4.2343	4.3517	4.0031	2.6845	2.6586	3.0013
pos_6749	Valechlorin	metab_6740	yes	down	-	pos	51771-49-4	491.207	3.9063	M+CH3OH+H	C22H31ClO8	-	60.4	HMDB0041045	-	-	-	-	-	Lipids and lipid-like molecules	Prenol lipids	Monoterpenoids	-	60.4	-	-	1.6112	1.6105	0.7583	0.006264	0.02307	3.1488	3.3499	2.7804	4.1312	3.9111	4.1935
pos_6770	Limocitrol 3-glucoside	metab_6761	yes	up	-	pos	77133-42-7	583.108	3.83782	M+2Na-H	C24H26O14	-	90.5	LMPK12113320;HMDB0037690	-	-	-	-	-	Phenylpropanoids and polyketides	Flavonoids	Flavonoid glycosides	-	90.5	-	-	3.053	3.0487	2.54	5.61e-07	6.9e-05	5.3935	5.4044	5.5696	2.1322	2.1445	2.1669
pos_6772	Acetoxy-6-gingerol	metab_6763	yes	up	-	pos	-	337.201	3.83782	M+H	C19H28O5	33	-	-	-	-	-	-	-	-	-	-	33	-	-	-	1.3229	1.3215	1.1728	0.02417	0.05948	4.7867	5.1762	4.537	3.9892	4.1143	4.2591
pos_6825	(+/-)-Naringenin	metab_6815	yes	up	-	pos	-	273.076	3.72447	M+H	C15H12O5	84.4	-	-	-	-	-	-	-	-	-	-	84.4	-	-	-	2.8162	2.8122	2.444	8.035e-08	2.195e-05	4.726	4.7406	4.8179	1.9321	1.9444	1.9667
pos_6832	N-(p-Hydroxyphenyl)ethyl p-hydroxycinnamide	metab_6822	yes	up	-	pos	36417-86-4	284.128	3.7017	M+H	C17H17NO3	44.1	-	HMDB0039521	-	-	-	-	-	Phenylpropanoids and polyketides	Cinnamic acids and derivatives	Hydroxycinnamic acids and derivatives	44.1	-	-	-	2.1534	2.1512	1.507	0.0004409	0.004524	5.0201	4.7477	5.1601	3.3011	3.4765	3.129
pos_6874	2'-Oxoaloesol 7-glucoside	metab_6864	yes	up	-	pos	-	417.118	3.61055	M+Na	C19H22O9	-	78	-	-	-	-	-	-	-	-	-	-	78	-	-	1.4827	1.4814	1.4157	0.003324	0.01521	2.9167	2.5285	2.9231	1.9547	1.967	1.9893
pos_6875	Isoacoramone	metab_6865	yes	up	-	pos	3904-18-5	225.112	3.61055	M+H	C12H16O4	59	-	HMDB0040629	-	-	-	-	-	Organic oxygen compounds	Organooxygen compounds	Carbonyl compounds	59	-	-	-	1.7495	1.7468	1.2788	1.136e-05	0.0004435	5.0188	5.0372	4.915	3.8925	3.9292	3.8842
pos_6887	5'-(3'-methoxy-4'-hydroxyphenyl)-gamma-valerolactone	metab_6876	yes	up	-	pos	-	223.096	3.58777	M+H	C12H14O4	58.3	-	HMDB0029226	-	-	-	-	-	Benzenoids	Phenols	Methoxyphenols	58.3	-	-	-	2.2167	2.2134	1.4794	1.383e-06	0.00012	5.4112	5.4206	5.3222	3.6472	3.6746	3.5995
pos_6907	PGH2	metab_6896	yes	up	C00427	pos	42935-17-1	335.221	3.54203	M+H-H2O	C20H32O5	71.7	-	HMDB0001381;LMFA03010010	Lipids	Eicosanoids	map01100;map00590	Metabolism;Metabolism	Global and overview maps;Lipid metabolism	Lipids and lipid-like molecules	Fatty Acyls	Eicosanoids	71.7	-	Metabolic pathways;Arachidonic acid metabolism	Metabolic pathways;Arachidonic acid metabolism	1.2231	1.2214	1.1218	0.01328	0.03848	5.3566	5.6357	5.199	4.7152	4.8193	4.8985
pos_6931	Taraxacoside	metab_6920	yes	up	-	pos	98449-40-2	381.118	3.49672	M+H-H2O	C18H22O10	-	79.8	HMDB0030055	-	-	-	-	-	Organic oxygen compounds	Organooxygen compounds	Carbohydrates and carbohydrate conjugates	-	79.8	-	-	1.8376	1.8353	1.3155	0.001777	0.0104	5.0668	5.2829	5.1729	4.0563	3.6242	4.1194
pos_6958	Benzofuran	metab_6946	yes	up	C14512	pos	271-89-6	119.049	3.47398	M+H	C8H6O	70.1	-	HMDB0032929	-	-	-	-	-	Organoheterocyclic compounds	Benzofurans	Not Available	70.1	-	-	-	1.231	1.232	1.1819	0.02837	0.06661	4.0499	4.1412	3.9929	3.2831	3.2268	3.7967
pos_6991	Isorhamnetin	metab_6979	yes	up	C10084	pos	480-19-3	317.065	3.40565	M+H	C16H12O7	84	-	HMDB0002655;LMPK12110002	-	-	-	-	-	Phenylpropanoids and polyketides	Flavonoids	Flavones	84	-	-	-	2.1686	2.1655	1.4618	3.597e-07	5.91e-05	5.2521	5.2843	5.3117	3.6015	3.6525	3.5878
pos_7005	1'-Acetoxychavicol acetate	metab_6993	yes	up	C10426	pos	151986-17-3;52946-22-2	235.096	3.38282	M+H	C13H14O4	53.6	-	HMDB0041005;HMDB0041006	-	-	-	-	-	Benzenoids	Phenol esters	Not Available	53.6	-	-	-	1.6575	1.6556	1.3246	0.001094	0.007669	4.1443	4.0429	4.0803	3.0429	2.9133	3.3055
pos_7029	Phe Gly	metab_7017	yes	down	-	pos	-	223.108	3.33705	M+H	C11H14N2O3	53.1	-	-	-	-	-	-	-	-	-	-	53.1	-	-	-	1.3914	1.3897	0.7291	0.0003235	0.003774	1.8887	1.8756	1.8636	2.5156	2.5098	2.6927
pos_7054	3-(2,5-dimethoxyphenyl)propanoic acid	metab_7042	yes	up	-	pos	-	211.097	3.2912	M+H	C11H14O4	74.7	-	-	-	-	-	-	-	-	-	-	74.7	-	-	-	1.2539	1.2523	1.139	0.0002768	0.003455	4.6566	4.6079	4.6233	4.0855	3.9774	4.1283
pos_7064	Osmanthuside A	metab_7052	yes	up	-	pos	97457-19-7	429.152	3.26842	M+H-H2O	C23H26O9	-	56.6	HMDB0038748	-	-	-	-	-	Phenylpropanoids and polyketides	Cinnamic acids and derivatives	Hydroxycinnamic acids and derivatives	-	56.6	-	-	1.7322	1.7299	1.3336	0.0001705	0.002583	4.2674	4.2589	4.3772	3.299	3.0862	3.2902
pos_7066	7-Deoxy-13-dihydroadriamycinone	metab_7054	yes	up	-	pos	-	401.123	3.26842	M+H	C21H20O8	42.7	-	HMDB0244417	-	-	-	-	-	Benzenoids	Naphthacenes	Tetracenequinones	42.7	-	-	-	1.2981	1.2966	1.1796	0.002065	0.01139	4.1907	3.9972	4.0483	3.378	3.4076	3.5873
pos_7069	4-Hydroxy-2H-pyran-3-carboxaldehyde	metab_7057	yes	up	-	pos	26110-68-9	275.055	3.26842	2M+Na	C6H6O3	-	58.2	HMDB0031256	-	-	-	-	-	Organoheterocyclic compounds	Pyrans	Not Available	-	58.2	-	-	1.867	1.8641	1.5311	0.008533	0.02843	4.0505	3.7988	3.7292	2.0138	2.8736	2.6764
pos_7084	Patulin	metab_7072	yes	up	C16748	pos	149-29-1	137.023	3.24553	M+H-H2O	C7H6O4	-	53.4	HMDB0034299	-	-	-	-	-	Organoheterocyclic compounds	Pyrans	Not Available	-	53.4	-	-	2.5387	2.5352	1.8621	2.495e-06	0.0001705	4.8924	4.8977	5.0416	2.7	2.5939	2.6703
pos_7107	Gibberellin A44	metab_7095	yes	up	C12308	pos	36434-15-8	347.185	3.2	M+H	C20H26O5	69.6	-	HMDB0036901;LMPR0104170030	-	-	-	-	-	Lipids and lipid-like molecules	Prenol lipids	Diterpenoids	69.6	-	-	-	1.0242	1.0236	1.0946	0.01553	0.04302	4.8189	4.9256	4.6606	4.302	4.338	4.5207
pos_7140	3,4-Methylenedioxybenzoic acid	metab_7128	yes	up	-	pos	94-53-1	167.034	3.15433	M+H	C8H6O4	56.6	-	HMDB0032613	-	-	-	-	-	Organoheterocyclic compounds	Benzodioxoles	Not Available	56.6	-	-	-	1.5847	1.5827	1.2945	5.955e-05	0.001353	3.9612	3.8481	4.0183	3.0604	3.0431	3.0344
pos_7153	Quercetin	metab_7141	yes	up	C00389	pos	117-39-5	303.05	3.13162	M+H	C15H10O7	64.5	-	LMPK12110004;HMDB0005794	-	-	map01100;map00941;map01110;map00944	Metabolism;Metabolism;Metabolism;Metabolism	Global and overview maps;Biosynthesis of other secondary metabolites;Global and overview maps;Biosynthesis of other secondary metabolites	Phenylpropanoids and polyketides	Flavonoids	Flavones	64.5	-	Metabolic pathways;Flavonoid biosynthesis;Biosynthesis of secondary metabolites;Flavone and flavonol biosynthesis	Metabolic pathways;Flavonoid biosynthesis;Biosynthesis of secondary metabolites;Flavone and flavonol biosynthesis	2.2962	2.2929	1.5233	3.144e-06	0.0001897	5.4187	5.4227	5.5141	3.5084	3.5829	3.6458
pos_7190	Val Ile Leu	metab_7178	yes	down	-	pos	-	344.254	3.0869	M+H	C17H33N3O4	72.1	-	-	-	-	-	-	-	-	-	-	72.1	-	-	-	1.4138	1.4125	0.7776	0.0008253	0.006589	2.4955	2.6851	2.4327	3.2644	3.2186	3.3092
pos_7268	L-beta-homoleucine	metab_7256	yes	up	-	pos	-	146.118	2.9726	M+H	C7H15NO2	33.4	-	-	-	-	-	-	-	-	-	-	33.4	-	-	-	1.391	1.3894	1.2244	0.0001169	0.002043	3.7459	3.7337	3.8492	3.111	3.1134	3.027
pos_7270	2,6-Dihydroxynaphthalene	metab_7258	yes	up	-	pos	-	161.06	2.9726	M+H	C10H8O2	55.3	-	-	-	-	-	-	-	-	-	-	55.3	-	-	-	1.3032	1.3014	1.1783	0.0003092	0.003727	3.972	4.0338	4.1248	3.4384	3.3811	3.4772
pos_7292	3-(2,5-dihydroxy-4-methoxyphenyl)-3,4-dihydro-2H-1-benzopyran-4,6,7-triol	metab_7280	yes	up	-	pos	-	641.186	2.92713	2M+H	C16H16O7	-	77.8	-	-	-	-	-	-	-	-	-	-	77.8	-	-	3.2123	3.2082	4.8517	0.001449	0.009135	4.7219	4.714	4.8443	1.8571	0.195	0.8912
pos_7302	3-Hydroxy-1-methylestra-1,3,5(10),6-tetraen-17-one	metab_7290	yes	up	C15308	pos	-	283.169	2.92713	M+H	C19H22O2	40.9	-	-	-	-	-	-	-	-	-	-	40.9	-	-	-	1.3039	1.3023	1.1806	0.007821	0.02674	4.315	4.393	4.0556	3.462	3.6008	3.7503
pos_7320	4-Hydroxy-2,3,9-trimethoxypterocarpan	metab_7308	yes	up	-	pos	56841-82-8	331.118	2.90442	M+H	C18H18O6	32.5	-	LMPK12070089;HMDB0033817	-	-	-	-	-	Organic oxygen compounds	Organooxygen compounds	Carbonyl compounds	32.5	-	-	-	1.4215	1.4198	1.2754	0.0007163	0.006077	3.434	3.3906	3.3602	2.7155	2.7573	2.5144
pos_7322	(R)-Bitalin A	metab_7310	yes	up	-	pos	35844-67-8	219.102	2.90442	M+H	C13H14O3	42.6	-	HMDB0040358	-	-	-	-	-	Benzenoids	Benzene and substituted derivatives	Acetophenones	42.6	-	-	-	1.6145	1.6124	1.2865	8.218e-05	0.001675	4.1206	4.1352	4.2883	3.2264	3.2347	3.2881
pos_7343	Isochinomin	metab_7331	yes	up	-	pos	83118-66-5	895.192	2.85963	2M+Na	C20H20O11	-	39.1	HMDB0041147	-	-	-	-	-	Organoheterocyclic compounds	Benzopyrans	1-benzopyrans	-	39.1	-	-	2.5609	2.5574	1.6197	6.834e-05	0.001487	6.0584	6.0527	6.2595	3.6545	3.6705	4.0185
pos_7368	Phe Ile	metab_7356	yes	up	-	pos	-	279.17	2.83688	M+H	C15H22N2O3	71.4	-	-	-	-	-	-	-	-	-	-	71.4	-	-	-	1.0876	1.087	1.1403	0.008813	0.02905	3.6507	3.5652	3.878	3.2749	3.2073	3.2456
pos_7411	Sinapyl alcohol	metab_7399	yes	up	C02325	pos	537-33-7	193.086	2.79292	M+H-H2O	C11H14O4	55.1	-	HMDB0013070	-	-	map01100;map00940;map01110	Metabolism;Metabolism;Metabolism	Global and overview maps;Biosynthesis of other secondary metabolites;Global and overview maps	Benzenoids	Phenols	Methoxyphenols	55.1	-	Metabolic pathways;Phenylpropanoid biosynthesis;Biosynthesis of secondary metabolites	Metabolic pathways;Phenylpropanoid biosynthesis;Biosynthesis of secondary metabolites	1.207	1.2057	1.1116	0.001331	0.008669	5.3033	5.3465	5.2748	4.7545	4.6777	4.8941
pos_7430	2,4-Dihydroxybenzoic acid	metab_7418	yes	up	C00230	pos	99-50-3;89-86-1	155.034	2.77025	M+H	C7H6O4	57.7	-	HMDB0029666;HMDB0001856	-	-	map01100;map01110	Metabolism;Metabolism	Global and overview maps;Global and overview maps	Benzenoids	Benzene and substituted derivatives	Benzoic acids and derivatives	57.7	-	Metabolic pathways;Biosynthesis of secondary metabolites	Metabolic pathways;Biosynthesis of secondary metabolites	2.2506	2.2475	1.712	5.417e-06	0.0002682	4.3274	4.2397	4.4163	2.511	2.5005	2.5715
pos_7452	Cyanidin 3-(6''-acetylglucoside)	metab_7440	yes	up	-	pos	-	491.118	2.72525	M+H	C23H22O12	76.9	-	HMDB0301884;LMPK12010132	-	-	-	-	-	Phenylpropanoids and polyketides	Flavonoids	Flavonoid glycosides	76.9	-	-	-	3.2643	3.2597	3.8064	7.263e-07	8.243e-05	5.1605	4.9974	5.2339	1.3334	1.3452	1.3668
pos_7459	7-Hydroxy-3-(4-methoxyphenyl)-4-propyl-2H-1-benzopyran-2-one	metab_7447	yes	up	C15051	pos	5219-18-1	311.128	2.72525	M+H	C19H18O4	30.7	-	-	-	-	-	-	-	-	-	-	30.7	-	-	-	1.5591	1.5584	1.386	0.0025	0.01278	3.2479	3.0319	3.4047	2.4058	2.407	2.1732
pos_7463	Orsellinic acid	metab_7451	yes	up	C01839	pos	-	169.05	2.72525	M+H	C8H8O4	88.4	-	LMPK13010001	-	-	-	-	-	-	-	-	88.4	-	-	-	1.5894	1.5872	1.289	2.896e-05	0.0008615	3.9633	3.9904	4.0893	3.0782	3.13	3.1346
pos_7501	Eriodictyol 7-(6-galloylglucoside)	metab_7489	yes	up	-	pos	-	585.124	2.63507	M+H-H2O	C28H26O15	-	49.2	HMDB0039921	-	-	-	-	-	Phenylpropanoids and polyketides	Flavonoids	Flavonoid glycosides	-	49.2	-	-	2.8085	2.8044	2.0436	6.164e-06	0.0002992	5.4401	5.5138	5.5143	2.5567	2.8489	2.6536
pos_7509	4,8-dihydroxy-2H-furo[2,3-h]chromen-2-one	metab_7497	yes	up	-	pos	-	219.029	2.63507	M+H	C11H6O5	-	53.7	-	-	-	-	-	-	-	-	-	-	53.7	-	-	1.8806	1.8783	1.4971	0.0009843	0.007278	4.1588	3.6522	3.8264	2.5755	2.5879	2.6104
pos_7512	3,4,5-trihydroxy-6-{3-[(5-oxooxolan-2-yl)methyl]phenoxy}oxane-2-carboxylic acid	metab_7500	yes	up	-	pos	-	759.213	2.61247	2M+Na	C17H20O9	-	48.6	-	-	-	-	-	-	-	-	-	-	48.6	-	-	2.209	2.2059	1.533	3.115e-06	0.0001897	5.0102	4.931	5.0194	3.1972	3.2395	3.3237
pos_7515	Trans-Caffeic acid [apiosyl-(1->6)-glucosyl] ester	metab_7503	yes	up	-	pos	-	497.129	2.61247	M+Na	C20H26O13	-	63	HMDB0033694	-	-	-	-	-	Phenylpropanoids and polyketides	Cinnamic acids and derivatives	Hydroxycinnamic acids and derivatives	-	63	-	-	2.0107	2.0084	1.4737	0.001214	0.008162	4.8939	4.3213	4.5689	3.2336	2.9883	3.1318
pos_7518	Dictyoquinazol C	metab_7506	yes	up	-	pos	-	381.081	2.61247	M+K	C18H18N2O5	-	58.6	HMDB0040442	-	-	-	-	-	Organoheterocyclic compounds	Diazanaphthalenes	Benzodiazines	-	58.6	-	-	1.7348	1.7328	1.386	0.006338	0.02321	4.4263	3.8118	4.0844	2.7442	2.9665	3.1822
pos_7527	Malonyldaidzin	metab_7515	yes	up	C16191	pos	124590-31-4	503.116	2.58998	M+H	C24H22O12	42.4	-	HMDB0041263	-	-	-	-	-	Phenylpropanoids and polyketides	Coumarins and derivatives	Furanocoumarins	42.4	-	-	-	1.8256	1.8231	1.302	5.283e-05	0.001291	5.1675	5.0617	5.1487	3.8474	4.0409	3.9222
pos_7577	2-Hydroxyiminodibenzyl glucuronide	metab_7565	yes	down	-	pos	-	388.139	2.5	M+H	C20H21NO7	32.5	-	-	-	-	-	-	-	-	-	-	32.5	-	-	-	2.3088	2.3059	0.5791	0.000211	0.002926	2.7211	2.8061	2.372	4.5227	4.674	4.4448
pos_7579	Val Glu Leu	metab_7567	yes	down	-	pos	-	360.213	2.5	M+H	C16H29N3O6	75.6	-	-	-	-	-	-	-	-	-	-	75.6	-	-	-	1.6939	1.6914	0.6593	0.009256	0.02996	2.2375	1.7093	2.4669	3.3179	3.305	3.105
pos_7590	Glu Trp	metab_7578	yes	up	-	pos	-	334.14	2.47772	M+H	C16H19N3O5	61.6	-	-	-	-	-	-	-	-	-	-	61.6	-	-	-	1.0912	1.0897	1.1193	0.005867	0.0221	4.2463	4.1653	4.278	3.6341	3.8977	3.8053
pos_7602	Val Gly Phe	metab_7590	yes	down	-	pos	-	322.176	2.45618	M+H	C16H23N3O4	53.6	-	-	-	-	-	-	-	-	-	-	53.6	-	-	-	1.6446	1.6425	0.668	0.0018	0.01051	2.2272	1.9461	1.8258	2.8686	3.0389	3.0736
pos_7608	Nomilin	metab_7596	yes	up	C08773	pos	1063-77-0	497.218	2.43397	M+H-H2O	C28H34O9	-	55.1	HMDB0035772	-	-	-	-	-	Lipids and lipid-like molecules	Prenol lipids	Triterpenoids	-	55.1	-	-	1.7981	1.8005	1.3973	0.03818	0.08323	4.7393	5.0093	4.7274	3.0601	2.9653	4.3334
pos_7610	Kaempferol-3-O-alpha-L-arabinoside	metab_7598	yes	up	-	pos	-	419.097	2.43397	M+H	C20H18O10	97.5	-	-	-	-	-	-	-	-	-	-	97.5	-	-	-	3.4488	3.444	4.3597	7.957e-05	0.001626	5.5076	5.5004	5.5368	0.8622	1.1874	1.7451
pos_7621	N-Deschlorobenzoyl indomethacin	metab_7609	yes	up	-	pos	-	202.086	2.41213	M+H-H2O	C12H13NO3	-	50.7	HMDB0013988	-	-	-	-	-	Organoheterocyclic compounds	Indoles and derivatives	Indolyl carboxylic acids and derivatives	-	50.7	-	-	1.2054	1.2042	1.1375	0.004497	0.01872	4.5536	4.3682	4.6302	3.9332	3.9027	4.0781
pos_7652	Tyr Pro His	metab_7640	yes	down	-	pos	-	416.192	2.34803	M+H	C20H25N5O5	37.9	-	-	-	-	-	-	-	-	-	-	37.9	-	-	-	2.3913	2.3881	0.475	0.0003139	0.003737	2.1493	1.8415	1.5997	3.7654	4.0018	3.9978
pos_7660	2-Phenylbutyrolactone	metab_7648	yes	up	-	pos	-	163.075	2.34803	M+H	C10H10O2	71.5	-	-	-	-	-	-	-	-	-	-	71.5	-	-	-	1.0504	1.0487	1.1122	4.39e-05	0.001144	3.9148	3.915	3.8552	3.4955	3.512	3.4975
pos_7665	6-(3-hydroxybut-1-en-1-yl)-7-methoxy-2H-chromen-2-one	metab_7653	yes	up	-	pos	-	556.194	2.32748	2M+ACN+Na	C14H14O4	-	36.2	-	-	-	-	-	-	-	-	-	-	36.2	-	-	2.4428	2.4393	1.9106	4.071e-07	5.967e-05	4.3866	4.4462	4.4996	2.3107	2.3231	2.3456
pos_7670	Myristoylglycine	metab_7658	yes	down	-	pos	-	303.264	2.32748	M+NH4	C16H31NO3	-	57.6	HMDB0013250	-	-	-	-	-	Organic acids and derivatives	Carboxylic acids and derivatives	Amino acids, peptides, and analogues	-	57.6	-	-	1.9844	1.9816	0.6145	0.008894	0.0292	2.943	2.1559	2.1391	3.9845	3.5982	4.1974
pos_7672	3-(5-Methyl-2-furyl)prop-2-enal	metab_7660	yes	up	-	pos	5555-90-8	137.06	2.32748	M+H	C8H8O2	-	39.7	HMDB0032400	-	-	-	-	-	Organoheterocyclic compounds	Heteroaromatic compounds	Not Available	-	39.7	-	-	1.5161	1.514	1.187	8.407e-06	0.0003736	5.1751	5.1505	5.2319	4.3718	4.3418	4.392
pos_7674	Diosmin	metab_7662	yes	up	C10039	pos	520-27-4	609.181	2.30553	M+H	C28H32O15	69.4	-	HMDB0029548	-	-	-	-	-	Phenylpropanoids and polyketides	Flavonoids	Flavonoid glycosides	69.4	-	-	-	2.6889	2.6848	1.9134	1.662e-05	0.0005755	5.4369	5.4452	5.2874	2.6513	2.9686	2.832
pos_7675	(-)-Epigallocatechin 3-glucuronide	metab_7663	yes	up	-	pos	-	465.103	2.30553	M+H-H2O	C21H22O13	-	75.7	HMDB0041639	-	-	-	-	-	Phenylpropanoids and polyketides	Flavonoids	Flavonoid glycosides	-	75.7	-	-	2.6012	2.5977	2.1783	6.709e-06	0.0003113	4.5549	4.2956	4.4878	2.0252	2.0375	2.0598
pos_7683	ETHYL SYRINGATE	metab_7671	yes	up	-	pos	-	227.091	2.30553	M+H	C11H14O5	66.6	-	-	-	-	-	-	-	-	-	-	66.6	-	-	-	1.3797	1.3781	1.1828	0.0008513	0.006688	4.5921	4.3406	4.4979	3.7644	3.7581	3.8319
pos_7690	Genistin	metab_7678	yes	up	-	pos	529-59-9	433.113	2.28422	M+H	C21H20O10	80.5	-	LMPK12050166;HMDB0033988	-	-	-	-	-	Phenylpropanoids and polyketides	Isoflavonoids	Isoflavonoid O-glycosides	80.5	-	-	-	3.0715	3.0671	2.5604	1.796e-08	9.451e-06	5.4441	5.5155	5.516	2.1444	2.1348	2.1572
pos_7724	NESS 0327	metab_7712	yes	up	-	pos	-	489.1	2.21967	M+H	C24H23Cl3N4O	34.9	-	-	-	-	-	-	-	-	-	-	34.9	-	-	-	3.723	3.719	8.0763	0.00159	0.009636	5.8164	5.7636	5.8272	0.0511	0.0525	2.0517
pos_7725	3,4,5,2',4',6'-Hexahydroxychalcone 2'-glucoside	metab_7713	yes	up	-	pos	-	467.119	2.21967	M+H	C21H22O12	39.4	-	LMPK12120279	-	-	-	-	-	-	-	-	39.4	-	-	-	2.6466	2.6429	1.8488	7.875e-07	8.67e-05	5.4057	5.3729	5.466	2.9294	2.8611	2.9952
pos_7729	DIHYDROROBINETIN	metab_7717	yes	up	-	pos	-	305.065	2.21967	M+H	C15H12O7	57.4	-	-	-	-	-	-	-	-	-	-	57.4	-	-	-	3.0929	3.0887	2.1825	5.421e-05	0.0013	6.3011	6.2589	6.3441	3.0114	2.5207	3.13
pos_7732	3R-aminononanoic acid	metab_7720	yes	down	-	pos	-	174.149	2.21967	M+H	C9H19NO2	58	-	LMFA01100019	-	-	-	-	-	-	-	-	58	-	-	-	2.1022	2.0998	0.6021	0.004688	0.01923	2.8825	2.6888	1.9731	4.2904	4.2474	3.993
pos_7743	5,7-octadienoic acid	metab_7731	yes	down	-	pos	-	141.091	2.19847	M+H	C8H12O2	39	-	LMFA01030442	-	-	-	-	-	-	-	-	39	-	-	-	1.0214	1.02	0.9068	0.000489	0.004861	3.6995	3.6363	3.6714	4.0551	4.0952	3.9875
pos_7764	Graveobioside B	metab_7752	yes	up	-	pos	33579-63-4	595.166	2.13353	M+H	C27H30O15	30.5	-	HMDB0037454	-	-	-	-	-	Phenylpropanoids and polyketides	Flavonoids	Flavonoid glycosides	30.5	-	-	-	1.8475	1.8446	1.2641	5.137e-05	0.001276	5.8482	5.8951	5.7314	4.5712	4.6966	4.5546
pos_7767	7,4',5'-Trihydroxy-5,2'-oxido-4-phenylcoumarin	metab_7755	yes	up	-	pos	-	285.039	2.13353	M+H	C15H8O6	59.4	-	LMPK12100060	-	-	-	-	-	-	-	-	59.4	-	-	-	3.4092	3.4045	6.7369	2.948e-05	0.0008733	4.8619	4.8276	4.8962	0.8062	1.0085	0.3504
pos_7782	Val Val Val	metab_7770	yes	down	-	pos	-	316.223	2.08933	M+H	C15H29N3O4	55.7	-	-	-	-	-	-	-	-	-	-	55.7	-	-	-	1.1149	1.1132	0.8098	0.003509	0.01583	1.9838	1.9707	1.9586	2.5588	2.3004	2.4438
pos_7783	Cyanidin	metab_7771	yes	up	C05905	pos	13306-05-3;528-58-5	287.055	2.08933	M+H	C15H10O6	84.5	-	LMPK12010002;HMDB0244184;HMDB0002708	-	-	map01100;map00942;map00941;map01110	Metabolism;Metabolism;Metabolism;Metabolism	Global and overview maps;Biosynthesis of other secondary metabolites;Biosynthesis of other secondary metabolites;Global and overview maps	Organoheterocyclic compounds	Triazines	1,3,5-triazines	84.5	-	Metabolic pathways;Anthocyanin biosynthesis;Flavonoid biosynthesis;Biosynthesis of secondary metabolites	Metabolic pathways;Anthocyanin biosynthesis;Flavonoid biosynthesis;Biosynthesis of secondary metabolites	2.837	2.8331	1.7113	5.006e-06	0.0002564	6.8754	6.8509	6.9163	4.1753	4.003	3.8845
pos_7806	N17-Dimethylindole-3-carboxaldehyde	metab_7793	yes	up	-	pos	-	174.091	2.04663	M+H	C11H11NO	44.5	-	-	-	-	-	-	-	-	-	-	44.5	-	-	-	1.8858	1.883	1.5228	0.004179	0.01783	3.8452	4.0659	3.7282	2.8925	2.1872	2.5631
pos_7811	(1S,2R,4R,8S)-p-Menthane-2,8,9-triol 9-glucoside	metab_7798	yes	down	-	pos	378254-08-1	373.183	2.025	M+Na	C16H30O8	-	53.2	HMDB0039978	-	-	-	-	-	Lipids and lipid-like molecules	Prenol lipids	Terpene glycosides	-	53.2	-	-	1.1793	1.1782	0.7846	0.01594	0.04399	2.0195	2.0064	1.9943	2.8196	2.4978	2.3561
pos_7814	4-Hydroxy-benzenepropanedioate	metab_7801	yes	up	-	pos	-	197.044	2.025	M+H	C9H8O5	-	43.7	HMDB0059809	-	-	-	-	-	Benzenoids	Phenol esters	Not Available	-	43.7	-	-	1.7129	1.7114	1.346	0.006635	0.02395	4.615	4.1194	4.2888	3.542	3.0395	3.0929
pos_7817	D-2-Aminoadipic acid	metab_7804	yes	down	-	pos	-	144.066	2.025	M+H-H2O	C6H11NO4	37.2	-	-	-	-	-	-	-	-	-	-	37.2	-	-	-	1.0233	1.0217	0.8993	0.002707	0.01335	3.5807	3.3986	3.4122	3.8547	3.8463	3.8542
pos_7837	Asp Trp Phe	metab_7824	yes	down	-	pos	-	467.189	1.96328	M+H	C24H26N4O6	36.9	-	-	-	-	-	-	-	-	-	-	36.9	-	-	-	1.2243	1.2232	0.8714	0.02175	0.05513	4.3565	3.908	4.0597	4.686	4.9016	4.5549
pos_7838	Dihydrozeatin riboside	metab_7825	yes	up	C16447	pos	-	354.177	1.96328	M+H	C15H23N5O5	53.7	-	-	-	-	map01110;map00908	Metabolism;Metabolism	Global and overview maps;Metabolism of terpenoids and polyketides	-	-	-	53.7	-	Biosynthesis of secondary metabolites;Zeatin biosynthesis	Biosynthesis of secondary metabolites;Zeatin biosynthesis	2.5437	2.5401	3.2974	0.0002438	0.003215	3.7075	3.1985	3.1041	0.9978	1.0089	1.0293
pos_7848	Isoorientin 2''-[feruloyl-(->6)-glucoside]	metab_7834	yes	up	-	pos	220948-75-4	751.185	1.94112	M+H-2H2O	C37H38O19	-	75.4	HMDB0032911	-	-	-	-	-	Lignans, neolignans and related compounds	Lignan glycosides	Not Available	-	75.4	-	-	3.1228	3.1184	2.9965	1.853e-07	3.695e-05	5.2687	5.1137	5.1965	1.7174	1.7296	1.7517
pos_7874	2-(2,4-dihydroxyphenyl)-2-oxoacetic acid	metab_7860	yes	up	-	pos	-	165.018	1.92117	M+H-H2O	C8H6O5	-	44.5	-	-	-	-	-	-	-	-	-	-	44.5	-	-	2.395	2.3918	2.3153	1.004e-05	0.0004048	3.6923	3.4498	3.6316	1.5358	1.5478	1.5698
pos_7877	3-Methylindole	metab_7863	yes	up	C08313	pos	83-34-1	132.081	1.92117	M+H	C9H9N	63.2	-	HMDB0000466	-	-	map00380	Metabolism	Amino acid metabolism	Organoheterocyclic compounds	Indoles and derivatives	Indoles	63.2	-	Tryptophan metabolism	Tryptophan metabolism	1.2657	1.2647	1.1625	0.007226	0.02546	4.4583	4.1566	4.5162	3.6726	3.8269	3.7967
pos_7899	Gravacridonetriol	metab_7885	yes	up	-	pos	59086-94-1	399.154	1.87857	M+ACN+H	C19H19NO6	-	81.5	HMDB0029330	-	-	-	-	-	Organoheterocyclic compounds	Quinolines and derivatives	Benzoquinolines	-	81.5	-	-	2.2622	2.2589	1.8142	6.64e-06	0.0003113	4.0012	4.0852	4.0717	2.3316	2.1493	2.2204
pos_7943	Cinncassiol C	metab_7929	yes	down	-	pos	73613-35-1	345.171	1.83447	M+H-2H2O	C20H28O7	-	51.5	HMDB0035166	-	-	-	-	-	Organic oxygen compounds	Organooxygen compounds	Carbohydrates and carbohydrate conjugates	-	51.5	-	-	2.5302	2.5265	0.496	0.0003363	0.003864	2.1337	2.1764	2.49	4.2552	4.632	4.827
pos_7945	Queuine	metab_7931	yes	up	C01449	pos	72496-59-4	319.151	1.83447	M+ACN+H	C12H15N5O3	-	41.5	HMDB0001495	-	-	-	-	-	Organoheterocyclic compounds	Pyrrolopyrimidines	Pyrrolo[2,3-d]pyrimidines	-	41.5	-	-	1.0145	1.0128	1.0919	0.002283	0.01214	4.4988	4.5872	4.4648	4.214	4.0742	4.1231
pos_7953	Flaviolin	metab_7939	yes	up	C18012	pos	479-05-0	207.029	1.83447	M+H	C10H6O5	63.5	-	-	-	-	-	-	-	-	-	-	63.5	-	-	-	1.6318	1.6296	1.3353	4.572e-06	0.0002463	3.812	3.7224	3.7773	2.8086	2.821	2.8435
pos_7964	3'-Glucosyl-2',4',6'-trihydroxyacetophenone	metab_7950	yes	up	-	pos	88885-07-8	353.084	1.8122	M+Na	C14H18O9	-	37	HMDB0040621	-	-	-	-	-	Organic oxygen compounds	Organooxygen compounds	Carbohydrates and carbohydrate conjugates	-	37	-	-	2.3192	2.3162	1.8077	0.0004759	0.004751	4.2673	4.4189	4.347	2.5232	2.6375	2.0471
pos_7999	N6,N6-Dimethyladenosine	metab_7985	yes	up	C03416	pos	2620-62-4	296.135	1.76857	M+H	C12H17N5O4	72.9	-	-	-	-	-	-	-	-	-	-	72.9	-	-	-	1.0672	1.0657	1.1284	0.003026	0.01438	3.6375	3.7079	3.8087	3.2178	3.3675	3.2996
pos_8033	2-Keto-glutaramic acid	metab_8018	yes	down	C00940	pos	18465-19-5	308.106	1.72755	2M+NH4	C5H7NO4	-	68	HMDB0001552	-	-	map01100;map00250	Metabolism;Metabolism	Global and overview maps;Amino acid metabolism	Organic acids and derivatives	Keto acids and derivatives	Short-chain keto acids and derivatives	-	68	Metabolic pathways;Alanine, aspartate and glutamate metabolism	Metabolic pathways;Alanine, aspartate and glutamate metabolism	1.2283	1.2269	0.88	0.0006688	0.005828	3.9927	4.0486	3.9899	4.4507	4.5958	4.6251
pos_8097	3-Hydroxymonoethylglycinexylidide	metab_8082	yes	down	C16572	pos	34604-56-3	187.124	1.66558	M+H-2H2O	C12H18N2O2	-	46.9	HMDB0060678;PW_C040577	-	-	-	-	-	Organic acids and derivatives	Carboxylic acids and derivatives	Amino acids, peptides, and analogues	-	46.9	-	-	1.4868	1.4846	0.838	1.017e-05	0.0004077	4.05	4.0438	4.1076	4.8339	4.8326	4.8929
pos_8101	Ne,Ne dimethyllysine	metab_8086	yes	up	C05545	pos	-	157.134	1.66558	M+H-H2O	C8H18N2O2	-	30.6	HMDB0013287	-	-	map01100;map00310	Metabolism;Metabolism	Global and overview maps;Amino acid metabolism	Organic acids and derivatives	Carboxylic acids and derivatives	Amino acids, peptides, and analogues	-	30.6	Metabolic pathways;Lysine degradation	Metabolic pathways;Lysine degradation	1.4199	1.4175	1.2682	0.005969	0.02235	3.3605	3.8259	3.6513	2.9384	2.8223	2.7867
pos_8129	Valyl-Glutamine	metab_8114	yes	down	-	pos	42854-54-6	228.134	1.64665	M+H-H2O	C10H19N3O4	-	54.6	HMDB0029125	-	-	-	-	-	Organic acids and derivatives	Carboxylic acids and derivatives	Amino acids, peptides, and analogues	-	54.6	-	-	1.9943	1.9914	0.4126	0.01009	0.03174	1.5164	0.8439	0.8838	3.1269	2.399	2.3327
pos_8130	2-(4-Methyl-5-thiazolyl)ethyl formate	metab_8115	yes	up	-	pos	90731-56-9	213.069	1.64665	M+ACN+H	C7H9NO2S	-	43.7	HMDB0032420	-	-	-	-	-	Organoheterocyclic compounds	Azoles	Thiazoles	-	43.7	-	-	1.2679	1.2699	1.1678	0.04957	0.1012	4.7802	5.0105	4.8665	3.879	4.0077	4.6639
pos_8172	5-Acetyl-2,3-dihydro-1H-pyrrolizine	metab_8157	yes	down	-	pos	55041-85-5	150.091	1.604	M+H	C9H11NO	-	30.5	HMDB0040051	-	-	-	-	-	Organoheterocyclic compounds	Pyrrolizines	Not Available	-	30.5	-	-	1.0012	1.0002	0.9227	0.001229	0.008243	4.4131	4.411	4.2862	4.7045	4.7509	4.7535
pos_8220	Piperidine	metab_8205	yes	down	C01746	pos	110-89-4	86.097	1.54082	M+H	C5H11N	51.3	-	HMDB0034301	-	-	map00960	Metabolism	Biosynthesis of other secondary metabolites	Organoheterocyclic compounds	Piperidines	Not Available	51.3	-	Tropane, piperidine and pyridine alkaloid biosynthesis	Tropane, piperidine and pyridine alkaloid biosynthesis	1.0053	1.0051	0.9269	0.005542	0.02142	4.8822	4.9083	4.7463	5.1678	5.1901	5.3248
pos_8233	5'-Deoxyadenosine	metab_8218	yes	up	C05198	pos	4754-39-6	252.109	1.48015	M+H	C10H13N5O3	93.4	-	HMDB0001983	-	-	-	-	-	Nucleosides, nucleotides, and analogues	5''-deoxyribonucleosides	Not Available	93.4	-	-	-	1.2662	1.2653	1.1595	0.00319	0.01485	4.3507	4.1876	4.4786	3.7025	3.8269	3.6975
pos_8263	Semilepidinoside B	metab_8248	yes	up	-	pos	-	430.157	1.41967	M+ACN+Na	C17H22N2O7	-	56.7	HMDB0033108	-	-	-	-	-	Organic oxygen compounds	Organooxygen compounds	Carbohydrates and carbohydrate conjugates	-	56.7	-	-	1.2603	1.2601	1.1975	0.005577	0.02146	3.7246	3.4763	3.7133	3.104	3.1215	2.8873
pos_8355	1-(3-Methylbutanoyl)-6-apiosylglucose	metab_8340	yes	up	-	pos	467242-31-5	438.197	1.18488	M+ACN+H	C16H28O11	-	40.7	HMDB0039953	-	-	-	-	-	Lipids and lipid-like molecules	Fatty Acyls	Fatty acyl glycosides	-	40.7	-	-	1.4387	1.4368	1.1633	0.0002578	0.003336	5.368	5.2554	5.2741	4.6046	4.4551	4.6054
pos_8498	Glu Gln	metab_8482	yes	up	-	pos	-	276.119	0.900083	M+H	C10H17N3O6	52	-	-	-	-	-	-	-	-	-	-	52	-	-	-	1.1458	1.1439	1.126	0.02055	0.05274	4.9062	4.7039	4.573	3.9979	4.346	4.2536
pos_8503	Diacetone alcohol	metab_8487	yes	down	-	pos	123-42-2	134.118	0.900083	M+NH4	C6H12O2	-	31.6	HMDB0031511	-	-	-	-	-	Organic oxygen compounds	Organooxygen compounds	Carbonyl compounds	-	31.6	-	-	2.8077	2.8042	0.4103	0.0007096	0.006066	1.9456	1.8987	2.1233	5.2563	5.0143	4.2729
pos_8574	4-Hydroxybenzaldehyde	metab_8558	yes	up	C00633	pos	123-08-0	123.044	0.70585	M+H	C7H6O2	88.2	-	HMDB0011718	-	-	map01100	Metabolism	Global and overview maps	Organic oxygen compounds	Organooxygen compounds	Carbonyl compounds	88.2	-	Metabolic pathways	Metabolic pathways	1.0615	1.0599	1.088	0.001737	0.01023	5.1261	5.1007	5.1231	4.5932	4.765	4.7503
pos_8673	L-NMMA	metab_8657	yes	up	C03884	pos	17035-90-4	189.135	0.6338	M+H	C7H16N4O2	67.5	-	HMDB0029416	-	-	-	-	-	Organic acids and derivatives	Carboxylic acids and derivatives	Amino acids, peptides, and analogues	67.5	-	-	-	1.0947	1.0931	1.0978	1.102e-05	0.0004369	4.8004	4.7932	4.7536	4.3479	4.3529	4.3679
pos_8679	Oxolan-3-one	metab_8663	yes	down	-	pos	22929-52-8	87.0446	0.6338	M+H	C4H6O2	35.3	-	HMDB0002523	-	-	-	-	-	Organoheterocyclic compounds	Dihydrofurans	Furanones	35.3	-	-	-	1.6695	1.6674	0.8176	0.0001185	0.002065	4.5271	4.5413	4.349	5.4941	5.4979	5.4187
pos_8766	L-2-Amino-5-(methylthio)pentanoic acid	metab_8749	yes	down	C17213	pos	25148-30-5	164.074	0.556333	M+H	C6H13NO2S	-	53.2	HMDB0030406	-	-	map01210;map01110;map00966	Metabolism;Metabolism;Metabolism	Global and overview maps;Global and overview maps;Biosynthesis of other secondary metabolites	Organic acids and derivatives	Carboxylic acids and derivatives	Amino acids, peptides, and analogues	-	53.2	2-Oxocarboxylic acid metabolism;Biosynthesis of secondary metabolites;Glucosinolate biosynthesis	2-Oxocarboxylic acid metabolism;Biosynthesis of secondary metabolites;Glucosinolate biosynthesis	2.6585	2.6544	0.2223	0.0001251	0.002123	0.4379	0.7571	0.974	3.3508	3.1082	3.2981
pos_6876	11beta-hydroxyandrost-4-ene-3,17-dione	metab_8990	yes	up	C05284	pos	382-44-5	303.195	3.61055	M+H	C19H26O3	42.4	-	LMST02020066;HMDB0006773	-	-	-	-	-	Organoheterocyclic compounds	Oxazinanes	Morpholines	42.4	-	-	-	1.0271	1.0268	1.106	0.04111	0.08796	4.7461	4.911	4.4539	4.1531	4.2143	4.3921
pos_7793	Epicatechin	metab_8996	yes	up	C09727;C06562	pos	490-46-0;154-23-4	291.086	2.0689	M+H	C15H14O6	83.2	-	HMDB0001871;LMPK12020003;HMDB0002780	-	-	map01100;map00941;map01110	Metabolism;Metabolism;Metabolism	Global and overview maps;Biosynthesis of other secondary metabolites;Global and overview maps	Phenylpropanoids and polyketides	Flavonoids	Flavans	83.2	-	Metabolic pathways;Flavonoid biosynthesis;Biosynthesis of secondary metabolites	Metabolic pathways;Flavonoid biosynthesis;Biosynthesis of secondary metabolites	2.4317	2.4284	2.0139	9.937e-05	0.001857	4.148	4.1085	4.3402	1.9522	2.3145	1.9868
neg_11	Glucodistylin	metab_9016	yes	up	-	neg	27297-45-6	465.104	2.06765	M-H, 2M-H, M+Cl, M-H2O-H	C21H22O12	-	66.3	HMDB0041597	-	-	-	-	-	Phenylpropanoids and polyketides	Flavonoids	Flavonoid glycosides	-	66.3	-	-	2.2658	2.264	1.5482	1.878e-06	4.76e-05	7.4597	7.4663	7.5168	4.9398	4.8226	4.7323
neg_26	L-Glutamine	metab_9031	yes	down	C00064	neg	5959-95-5;56-85-9	145.061	0.602	M-H, M+FA-H, M-H2O-H	C5H10N2O3	55.6	-	HMDB0000641;HMDB0003423;PW_C000500	Peptides	Amino acids	map01100;map00630;map00220;map00230;map01240;map02010;map00910;map01230;map00240;map00250;map00970;map00750	Metabolism;Metabolism;Metabolism;Metabolism;Metabolism;Environmental Information Processing;Metabolism;Metabolism;Metabolism;Metabolism;Genetic Information Processing;Metabolism	Global and overview maps;Carbohydrate metabolism;Amino acid metabolism;Nucleotide metabolism;Global and overview maps;Membrane transport;Energy metabolism;Global and overview maps;Nucleotide metabolism;Amino acid metabolism;Translation;Metabolism of cofactors and vitamins	Organic acids and derivatives	Carboxylic acids and derivatives	Amino acids, peptides, and analogues	55.6	-	Metabolic pathways;Glyoxylate and dicarboxylate metabolism;Arginine biosynthesis;Purine metabolism;Biosynthesis of cofactors;ABC transporters;Nitrogen metabolism;Biosynthesis of amino acids;Pyrimidine metabolism;Alanine, aspartate and glutamate metabolism;Aminoacyl-tRNA biosynthesis;Vitamin B6 metabolism	Metabolic pathways;Glyoxylate and dicarboxylate metabolism;Arginine biosynthesis;Purine metabolism;Biosynthesis of cofactors;ABC transporters;Nitrogen metabolism;Biosynthesis of amino acids;Pyrimidine metabolism;Alanine, aspartate and glutamate metabolism;Aminoacyl-tRNA biosynthesis;Vitamin B6 metabolism	1.062	1.0608	0.8819	0.0007221	0.003242	4.4626	4.4861	4.3555	4.9443	5.1141	5.0283
neg_50	Tyrosyl-Hydroxyproline	metab_9053	yes	down	-	neg	936346-34-8	293.115	2.2237	M-H, M+Na-2H, M-H2O-H	C14H18N2O5	-	70	HMDB0029106	-	-	-	-	-	Organic acids and derivatives	Carboxylic acids and derivatives	Amino acids, peptides, and analogues	-	70	-	-	1.187	1.1852	0.8123	0.008678	0.01914	3.3816	3.6239	3.1969	3.9715	4.2969	4.2913
neg_51	Zingerone glucoside	metab_9054	yes	up	-	neg	64703-96-4	401.145	2.31362	M+Cl, M+FA-H, M-H	C17H24O8	-	34.5	HMDB0040558	-	-	-	-	-	Organic oxygen compounds	Organooxygen compounds	Carbohydrates and carbohydrate conjugates	-	34.5	-	-	1.4574	1.456	1.3474	1.268e-05	0.0001897	4.2486	4.227	4.3014	3.1928	3.0899	3.2007
neg_100	Chorismate	metab_9103	yes	up	C00251	neg	617-12-9	451.089	2.54185	M+Na-2H, 2M-H, M-H2O-H	C10H10O6	-	58.3	HMDB0012199	-	-	map01100;map01110;map01240;map00130;map00998;map01230;map00790;map00400	Metabolism;Metabolism;Metabolism;Metabolism;Metabolism;Metabolism;Metabolism;Metabolism	Global and overview maps;Global and overview maps;Global and overview maps;Metabolism of cofactors and vitamins;Biosynthesis of other secondary metabolites;Global and overview maps;Metabolism of cofactors and vitamins;Amino acid metabolism	Organic acids and derivatives	Carboxylic acids and derivatives	Dicarboxylic acids and derivatives	-	58.3	Metabolic pathways;Biosynthesis of secondary metabolites;Biosynthesis of cofactors;Ubiquinone and other terpenoid-quinone biosynthesis;Biosynthesis of various secondary metabolites - part 2;Biosynthesis of amino acids;Folate biosynthesis;Phenylalanine, tyrosine and tryptophan biosynthesis	Metabolic pathways;Biosynthesis of secondary metabolites;Biosynthesis of cofactors;Ubiquinone and other terpenoid-quinone biosynthesis;Biosynthesis of various secondary metabolites - part 2;Biosynthesis of amino acids;Folate biosynthesis;Phenylalanine, tyrosine and tryptophan biosynthesis	2.2832	2.2821	2.269	0.0002972	0.00172	4.8045	4.9979	4.8258	2.164	1.7549	2.5279
neg_101	L-glycyl-L-hydroxyproline	metab_9104	yes	down	-	neg	-	223.045	0.64105	M-H, M+FA-H, M+Cl	C7H12N2O4	-	61	-	-	-	-	-	-	-	-	-	-	61	-	-	1.1473	1.1447	0.8386	0.007459	0.01708	3.8993	3.9521	3.514	4.428	4.5416	4.5813
neg_104	Cymorcin monoglucoside	metab_9107	yes	up	-	neg	76859-62-6	327.145	2.65607	M-H, M+Cl, M+FA-H	C16H24O7	-	37	HMDB0029777	-	-	-	-	-	Organic oxygen compounds	Organooxygen compounds	Carbohydrates and carbohydrate conjugates	-	37	-	-	1.6502	1.6492	1.5747	0.0005288	0.002592	3.8525	3.9234	3.9876	2.7318	2.2636	2.4738
neg_113	(+/-)-Taxifolin	metab_9116	yes	up	-	neg	149418-37-1	303.051	3.05855	M-H, M+Na-2H, M-H2O-H	C15H12O7	73.7	-	HMDB0040894	-	-	-	-	-	Phenylpropanoids and polyketides	Stilbenes	Not Available	73.7	-	-	-	2.6189	2.6167	2.4212	1.926e-07	1.096e-05	6.113	5.9613	5.9987	2.463	2.5052	2.4952
neg_124	Beta-D-Xylopyranosyl-(1->5)-alpha-L-arabinofuranosyl-(1->3)-L-arabinose	metab_9126	yes	down	-	neg	7268-42-0	827.268	1.43808	M+Cl, M+FA-H, 2M-H	C15H26O13	-	36.7	HMDB0038859	-	-	-	-	-	Organic oxygen compounds	Organooxygen compounds	Carbohydrates and carbohydrate conjugates	-	36.7	-	-	1.4247	1.4248	0.7474	0.0148	0.02941	3.3325	3.6137	3.3699	4.8189	4.919	4.0661
neg_135	Azaleatin 3-glucoside	metab_9137	yes	up	-	neg	-	477.104	1.63925	M-H, M+Cl, M-H2O-H	C22H22O12	-	62.6	LMPK12112542;HMDB0037360	-	-	-	-	-	Phenylpropanoids and polyketides	Flavonoids	Flavonoid glycosides	-	62.6	-	-	1.9498	1.9474	2.0872	0.002608	0.00765	4.203	3.7872	3.7808	1.3374	2.1119	2.19
neg_315	Thiomorpholine 3-carboxylate	metab_9317	yes	up	C03901	neg	20960-92-3	353.088	1.70663	M+FA-H, 2M+Hac-H	C5H9NO2S	-	32.8	HMDB0059611	-	-	-	-	-	Organic acids and derivatives	Carboxylic acids and derivatives	Amino acids, peptides, and analogues	-	32.8	-	-	2.0211	2.0195	1.9588	4.145e-05	0.0004362	4.4165	4.2232	4.3345	2.292	2.0211	2.3104
neg_327	Gallic acid	metab_9329	yes	up	C01424	neg	149-91-7	169.013	1.75215	M-H2O-H, M-H	C7H6O5	35.6	-	HMDB0005807	-	-	-	-	-	Benzenoids	Benzene and substituted derivatives	Benzoic acids and derivatives	35.6	-	-	-	1.6666	1.6654	1.3899	6.404e-05	0.0005931	5.3019	5.0459	5.0645	3.6901	3.713	3.6848
neg_340	2-Hydroxybenzaldehyde O-[xylosyl-(1->6)-glucoside]	metab_9342	yes	up	-	neg	14907-56-3	461.13	1.79778	M+Na-2H, M+FA-H	C18H24O11	-	46	HMDB0034157	-	-	-	-	-	Organic oxygen compounds	Organooxygen compounds	Carbohydrates and carbohydrate conjugates	-	46	-	-	1.0794	1.0779	1.1474	0.0003844	0.002079	4.7886	4.6413	4.7945	4.1189	4.0993	4.1771
neg_391	Monotropein	metab_9393	yes	up	C09788	neg	5945-50-6	389.109	2.023	M-H, M+Cl	C16H22O11	-	49.9	HMDB0035608;LMPR0102070012	-	-	-	-	-	Lipids and lipid-like molecules	Prenol lipids	Terpene glycosides	-	49.9	-	-	1.782	1.7803	1.7044	0.000803	0.003505	4.2721	3.8828	4.0036	2.1947	2.2779	2.66
neg_403	Homoveratric acid	metab_9405	yes	up	-	neg	93-40-3	195.065	2.0893	M-H, M+Na-2H	C10H12O4	36	-	HMDB0000434	-	-	-	-	-	Benzenoids	Benzene and substituted derivatives	Methoxybenzenes	36	-	-	-	1.2035	1.202	1.2431	1.76e-05	0.0002393	3.8032	3.7974	3.8756	3.0471	3.11	3.0735
neg_418	Safflomin A	metab_9420	yes	up	-	neg	146087-19-6;78281-02-4	593.151	2.11192	M-H2O-H, M-H	C27H32O16	-	34.7	HMDB0040677;HMDB0030558	-	-	-	-	-	Phenylpropanoids and polyketides	Cinnamic acids and derivatives	Hydroxycinnamic acids and derivatives	-	34.7	-	-	1.3147	1.3143	1.201	0.0002208	0.001379	5.3877	5.4798	5.3161	4.4934	4.3991	4.5824
neg_428	3-O-Feruloylquinic acid	metab_9430	yes	up	C02572	neg	62929-69-5	367.103	2.11192	M-H, M+Na-2H	C17H20O9	-	64.9	HMDB0030669	-	-	-	-	-	Organic oxygen compounds	Organooxygen compounds	Alcohols and polyols	-	64.9	-	-	1.2247	1.2232	1.1774	5.43e-05	0.0005308	5.1337	5.141	5.1962	4.3071	4.3962	4.4358
neg_430	2-(3,4,5-trihydroxyphenyl)-3,4-dihydro-2H-1-benzopyran-3,4,5,7-tetrol	metab_9432	yes	up	-	neg	-	303.051	2.24608	M-H2O-H, M+Na-2H	C15H14O8	-	52.2	-	-	-	-	-	-	-	-	-	-	52.2	-	-	2.6454	2.6431	3.2313	4.133e-09	1.399e-06	5.1897	5.2337	5.2511	1.6133	1.6228	1.6164
neg_444	Irilone 4'-glucoside	metab_9446	yes	up	-	neg	50868-47-8	441.083	2.31362	M-H2O-H, M+FA-H	C22H20O11	-	40.9	HMDB0033818	-	-	-	-	-	Phenylpropanoids and polyketides	Isoflavonoids	Isoflavonoid O-glycosides	-	40.9	-	-	1.785	1.7827	1.5143	0.000211	0.001337	4.8871	4.8469	4.9309	2.9746	3.3382	3.3701
neg_474	(-)-erythro-Anethole glycol 2-glucoside	metab_9476	yes	up	-	neg	217973-39-2	343.14	2.47328	M-H, M+Cl	C16H24O8	-	50.8	HMDB0033067	-	-	-	-	-	Organic oxygen compounds	Organooxygen compounds	Carbohydrates and carbohydrate conjugates	-	50.8	-	-	1.8837	1.8825	1.7061	0.0002135	0.001347	4.3829	4.5236	4.5185	2.7559	2.3492	2.7641
neg_500	Astilbin	metab_9502	yes	up	C17449	neg	29838-67-3	495.115	2.61043	M-H, M+FA-H	C21H22O11	-	66.3	HMDB0242667;HMDB0033850	-	-	-	-	-	Phenylpropanoids and polyketides	Flavonoids	Flavonoid glycosides	-	66.3	-	-	2.2134	2.2114	1.9419	7.089e-05	0.0006337	5.4288	5.0787	5.2204	2.641	2.5458	2.9135
neg_523	2-O-Benzoyl-D-glucose	metab_9525	yes	up	-	neg	63029-01-6	329.088	2.74795	M+Na-2H, M+FA-H	C13H16O7	-	77.4	HMDB0034618	-	-	-	-	-	Organic oxygen compounds	Organooxygen compounds	Carbohydrates and carbohydrate conjugates	-	77.4	-	-	2.6007	2.5982	3.4608	2.419e-07	1.263e-05	4.8428	4.8685	5.002	1.4134	1.4226	1.4163
neg_537	3-Phenylpropyl glucosinolate	metab_9539	yes	up	-	neg	76265-25-3	436.071	2.81658	M-H, M+Na-2H	C16H23NO9S2	-	32.6	HMDB0038422	-	-	-	-	-	Organic oxygen compounds	Organooxygen compounds	Carbohydrates and carbohydrate conjugates	-	32.6	-	-	1.0157	1.0147	1.1493	0.001355	0.005027	4.2508	4.2536	4.1696	3.553	3.7618	3.7145
neg_576	Gamma-delta-Dioxovaleric acid	metab_9578	yes	up	C02800	neg	-	151.003	3.0362	M+Na-2H, 2M+FA-H	C5H6O4	-	55.9	HMDB0013233	-	-	map00860	Metabolism	Metabolism of cofactors and vitamins	Organic acids and derivatives	Keto acids and derivatives	Gamma-keto acids and derivatives	-	55.9	Porphyrin and chlorophyll metabolism	Porphyrin and chlorophyll metabolism	2.3379	2.336	2.5411	2.236e-05	0.0002838	4.7378	4.5999	4.6522	1.8312	2.0419	1.6332
neg_578	3,4,5-trihydroxy-6-[2-(2-hydroxybenzoyloxy)phenoxy]oxane-2-carboxylic acid	metab_9580	yes	up	-	neg	-	451.088	3.05855	M-H, M+FA-H	C19H18O10	-	58.3	-	-	-	-	-	-	-	-	-	-	58.3	-	-	3.044	3.0416	3590.53	1.116e-07	7.941e-06	4.6874	4.8802	4.7709	0.0013	0.0013	0.0013
neg_671	Trilobatin	metab_9673	yes	up	-	neg	4192-90-9	435.13	3.28508	M-H2O-H, M-H	C21H24O10	-	80.3	HMDB0037505;LMPK12120518	-	-	-	-	-	Phenylpropanoids and polyketides	Flavonoids	Flavonoid glycosides	-	80.3	-	-	2.5259	2.5242	2.4966	7.055e-05	0.0006318	5.4735	5.5543	5.5479	2.335	1.8337	2.4691
neg_676	5-(3',4',5'-Trihydroxyphenyl)-gamma-valerolactone-3'-O-glucuronide	metab_9678	yes	up	-	neg	-	437.052	3.1937	M+Na-2H, M+K-2H	C17H20O11	-	30.2	HMDB0059984	-	-	-	-	-	Organic oxygen compounds	Organooxygen compounds	Carbohydrates and carbohydrate conjugates	-	30.2	-	-	2.1907	2.1887	1.8657	1.519e-05	0.000217	5.3166	5.3638	5.3654	2.7307	2.814	3.0572
neg_723	2-(3,5-dihydroxyphenyl)-3,5,6,7-tetrahydroxy-3,4-dihydro-2H-1-benzopyran-4-one	metab_9725	yes	up	-	neg	-	319.046	2.77092	M-H, M+Na-2H	C15H12O8	-	78.8	-	-	-	-	-	-	-	-	-	-	78.8	-	-	2.7567	2.754	3.531	2.779e-07	1.367e-05	5.4611	5.3688	5.5676	1.5438	1.5532	1.5468
neg_771	Gentisein	metab_9773	yes	up	C10065	neg	529-49-7	289.036	2.47328	M+FA-H, 2M+FA-H	C13H8O5	-	64.1	HMDB0029463	-	-	-	-	-	Organoheterocyclic compounds	Benzopyrans	1-benzopyrans	-	64.1	-	-	2.4116	2.4094	2.9379	2.669e-08	3.698e-06	4.5281	4.5144	4.5933	1.5432	1.5526	1.5462
neg_830	Isovalerylglutamic acid	metab_9831	yes	down	-	neg	80154-63-8	266.082	5.8778	M+Na-2H, M+Cl	C10H17NO5	-	40.1	HMDB0000726	-	-	-	-	-	Organic acids and derivatives	Carboxylic acids and derivatives	Amino acids, peptides, and analogues	-	40.1	-	-	1.6058	1.6079	0.6831	0.01222	0.02512	2.9834	3.329	3.1453	4.2296	4.364	5.2553
neg_832	1,11-Undecanedicarboxylic acid	metab_9833	yes	down	-	neg	505-52-2	243.16	5.9005	M-H, M+Na-2H	C13H24O4	63.3	-	HMDB0002327	-	-	-	-	-	Lipids and lipid-like molecules	Fatty Acyls	Fatty acids and conjugates	63.3	-	-	-	1.0078	1.0069	0.8625	0.000129	0.000959	3.2973	3.3429	3.2932	3.8456	3.8925	3.7802
neg_874	3,5,6,7-tetrahydroxy-2-(4-hydroxy-3-methoxyphenyl)-8aH-chromen-8a-yl	metab_9875	yes	up	-	neg	-	299.056	2.2909	M-H2O-H, M-H	C16H14O7	-	60.9	-	-	-	-	-	-	-	-	-	-	60.9	-	-	2.0829	2.0802	1.8422	0.0005714	0.002737	4.9695	4.9845	5.0005	2.2494	2.9596	2.9086
neg_1094	Oxoadipic acid	metab_10095	yes	up	C00322	neg	3184-35-8	181.013	2.023	M+Na-2H, 3M-H	C6H8O5	-	48.5	PW_C000150;LMFA01170121;HMDB0000225	Organic acids	Carboxylic acids	map01100;map00310;map01110;map00300;map01240;map01210;map01230;map00380	Metabolism;Metabolism;Metabolism;Metabolism;Metabolism;Metabolism;Metabolism;Metabolism	Global and overview maps;Amino acid metabolism;Global and overview maps;Amino acid metabolism;Global and overview maps;Global and overview maps;Global and overview maps;Amino acid metabolism	Organic acids and derivatives	Keto acids and derivatives	Medium-chain keto acids and derivatives	-	48.5	Metabolic pathways;Lysine degradation;Biosynthesis of secondary metabolites;Lysine biosynthesis;Biosynthesis of cofactors;2-Oxocarboxylic acid metabolism;Biosynthesis of amino acids;Tryptophan metabolism	Metabolic pathways;Lysine degradation;Biosynthesis of secondary metabolites;Lysine biosynthesis;Biosynthesis of cofactors;2-Oxocarboxylic acid metabolism;Biosynthesis of amino acids;Tryptophan metabolism	1.4062	1.4046	1.5565	0.009676	0.02084	3.1754	3.0137	3.1081	1.5693	2.0279	2.3763
neg_1111	Fluorocitric acid	metab_10112	yes	up	-	neg	-	190.998	1.93463	M-H2O-H, M-H	C6H7FO7	-	44	-	-	-	-	-	-	-	-	-	-	44	-	-	1.9852	1.9834	2.2696	2.287e-05	0.000287	3.7427	3.5611	3.6305	1.5277	1.537	1.7521
neg_1646	Fluticasone 17beta-carboxylic acid	metab_10647	yes	down	-	neg	-	431.14	0.924583	M+Cl	C21H26F2O5	-	49.3	HMDB0061092	-	-	-	-	-	Lipids and lipid-like molecules	Steroids and steroid derivatives	Androstane steroids	-	49.3	-	-	1.2501	1.2499	0.8286	0.01058	0.0224	4.5162	4.0566	4.2053	5.3289	5.2226	4.8678
neg_1758	Guanosine-3',5'-cyclic monophosphate	metab_10759	yes	down	-	neg	-	344.04	1.41658	M-H	C10H12N5O7P	92.2	-	-	-	-	-	-	-	-	-	-	92.2	-	-	-	1.1773	1.1765	0.695	0.004527	0.0116	1.7604	1.7201	1.6894	2.5533	2.2263	2.6567
neg_1791	Threoninyl-Cysteine	metab_10792	yes	down	-	neg	186761-52-4	203.049	1.52575	M-H2O-H	C7H14N2O4S	-	38.3	HMDB0029058	-	-	-	-	-	Organic acids and derivatives	Carboxylic acids and derivatives	Amino acids, peptides, and analogues	-	38.3	-	-	1.1347	1.1345	0.642	0.02595	0.04673	1.3822	1.3816	1.3517	2.5058	2.1657	1.7405
neg_1852	2,3,5-trihydroxy-6-(hydroxymethyl)oxan-4-yl 3,4,5-trihydroxybenzoate	metab_10853	yes	up	-	neg	-	331.067	1.63925	M-H	C13H16O10	-	64.6	-	-	-	-	-	-	-	-	-	-	64.6	-	-	1.2558	1.2535	1.2223	0.003388	0.009218	4.7747	4.4406	4.8396	3.8287	3.7332	3.9365
neg_1906	Glutamylmethionine	metab_10907	yes	down	-	neg	4423-22-7	277.086	1.72938	M-H	C10H18N2O5S	-	67.4	HMDB0028825	-	-	-	-	-	Organic acids and derivatives	Carboxylic acids and derivatives	Amino acids, peptides, and analogues	-	67.4	-	-	1.0078	1.0063	0.8187	0.002057	0.006836	2.5254	2.5053	2.3238	2.93	3.0715	2.9822
neg_1994	N-Benzoylaspartic acid	metab_10994	yes	up	-	neg	4631-12-03	282.062	1.86652	M+FA-H	C11H11NO5	-	62.1	HMDB0034251	-	-	-	-	-	Organic acids and derivatives	Carboxylic acids and derivatives	Amino acids, peptides, and analogues	-	62.1	-	-	1.964	1.9623	1.7725	9.482e-06	0.0001555	4.6358	4.5766	4.5072	2.4598	2.6312	2.6488
neg_2019	Cinnamtannin B2	metab_11019	yes	down	C17629	neg	88038-12-4	575.12	1.88938	M-2H	C60H48O24	-	34	HMDB0037668	-	-	-	-	-	Lipids and lipid-like molecules	Prenol lipids	Monoterpenoids	-	34	-	-	1.0492	1.0466	0.8048	0.009649	0.02079	2.6487	2.6327	2.3265	3.2283	2.99	3.2357
neg_2026	4,6,7-trihydroxy-2H-chromen-2-one	metab_11026	yes	up	-	neg	-	193.013	1.91197	M-H	C9H6O5	-	65.7	-	-	-	-	-	-	-	-	-	-	65.7	-	-	1.8811	1.8792	1.644	9.502e-07	2.905e-05	4.6585	4.6184	4.6995	2.7917	2.8867	2.8235
neg_2031	Palatinose	metab_11031	yes	up	C01742	neg	13718-94-0	323.098	1.91197	M-H2O-H	C12H22O11	46.1	-	HMDB0256083	Carbohydrates	Oligosaccharides	-	-	-	Organic oxygen compounds	Organooxygen compounds	Carbohydrates and carbohydrate conjugates	46.1	-	-	-	1.4645	1.4631	1.3589	0.001056	0.004228	4.5132	4.0904	4.2982	3.2058	3.0566	3.2327
neg_2094	1,2,6,8-Tetrahydroxy-3-methylanthraquinone 2-O-b-D-glucoside	metab_11094	yes	up	-	neg	-	493.099	2.00155	M+FA-H	C21H20O11	-	55.2	HMDB0032903	-	-	-	-	-	Benzenoids	Anthracenes	Anthraquinones	-	55.2	-	-	2.1491	2.1472	2.0153	3.919e-06	8.185e-05	4.6967	4.6962	4.8037	2.4259	2.235	2.382
neg_2113	Cinnamtannin II	metab_11113	yes	down	C17626	neg	86631-39-2	720.159	2.023	M-2H	C75H62O30	-	54.4	HMDB0037659	-	-	-	-	-	Phenylpropanoids and polyketides	Flavonoids	Biflavonoids and polyflavonoids	-	54.4	-	-	1.5314	1.5291	0.3491	0.004557	0.01166	0.6942	0.6937	0.6689	2.4069	1.7758	1.7086
neg_2116	3-O-p-Coumaroylquinic acid	metab_11116	yes	up	-	neg	-	337.093	2.04542	M-H	C16H18O8	-	69.2	HMDB0029681	-	-	-	-	-	Organic oxygen compounds	Organooxygen compounds	Alcohols and polyols	-	69.2	-	-	2.2314	2.2284	2.098	0.0001333	0.0009802	5.0113	4.8096	5.0195	2.035	2.5812	2.4585
neg_2119	Kojic acid	metab_11119	yes	up	C14516	neg	501-30-4	163.003	2.06765	M+Na-2H	C6H6O4	-	36	HMDB0032923;HMDB0258034	-	-	-	-	-	Organoheterocyclic compounds	Pyrans	Pyranones and derivatives	-	36	-	-	1.9903	1.9885	1.7902	1.323e-07	8.717e-06	4.5808	4.6311	4.6663	2.5872	2.5838	2.5807
neg_2122	6-Hydroxyluteolin	metab_11122	yes	up	C10072	neg	18003-33-3	301.035	2.06765	M-H	C15H10O7	-	50.5	LMPK12111229;HMDB0036632	-	-	-	-	-	Phenylpropanoids and polyketides	Flavonoids	Flavones	-	50.5	-	-	2.5596	2.5574	2.7023	4.1e-07	1.707e-05	5.3441	5.3507	5.3966	1.9966	1.8896	2.0689
neg_2129	6-[(1Z)-2-hydroxy-3-oxobut-1-en-1-yl]-7-methoxy-2H-chromen-2-one	metab_11129	yes	up	-	neg	-	241.05	2.0893	M-H2O-H	C14H12O5	-	74.2	-	-	-	-	-	-	-	-	-	-	74.2	-	-	2.4165	2.4143	3.3832	1.235e-08	2.481e-06	4.2416	4.2674	4.3105	1.2591	1.2682	1.262
neg_2130	Luteolin	metab_11130	yes	up	C01514	neg	491-70-3	285.041	2.0893	M-H	C15H10O6	49.4	-	LMPK12110006;HMDB0005800	-	-	map01100;map00941;map01110;map00944	Metabolism;Metabolism;Metabolism;Metabolism	Global and overview maps;Biosynthesis of other secondary metabolites;Global and overview maps;Biosynthesis of other secondary metabolites	Phenylpropanoids and polyketides	Flavonoids	Flavones	49.4	-	Metabolic pathways;Flavonoid biosynthesis;Biosynthesis of secondary metabolites;Flavone and flavonol biosynthesis	Metabolic pathways;Flavonoid biosynthesis;Biosynthesis of secondary metabolites;Flavone and flavonol biosynthesis	2.6904	2.6884	3.0332	5.183e-06	9.855e-05	5.5486	5.5639	5.6205	2.0111	1.6286	1.8769
neg_2132	EMODIC ACID	metab_11132	yes	up	-	neg	-	299.02	2.0893	M-H	C15H8O7	39.8	-	-	-	-	-	-	-	-	-	-	39.8	-	-	-	2.5527	2.5504	3.1139	6.488e-09	1.915e-06	4.9241	4.9347	4.9859	1.5853	1.5947	1.5883
neg_2134	D-Erythroascorbic acid 1'-a-D-glucoside	metab_11134	yes	up	-	neg	174339-86-7	345.025	2.0893	M+K-2H	C11H16O10	-	70.3	HMDB0033627	-	-	-	-	-	Organic oxygen compounds	Organooxygen compounds	Carbohydrates and carbohydrate conjugates	-	70.3	-	-	2.1638	2.1618	2.6463	1.2e-05	0.0001819	4.0466	3.7307	3.8917	1.4657	1.475	1.4687
neg_2169	A-L-Fucopyranosyl-(1->2)-b-D-galactopyranosyl-(1->2)-D-xylose	metab_11169	yes	up	-	neg	130136-27-5	495.115	2.1562	M+K-2H	C17H30O14	-	87.8	HMDB0041222	-	-	-	-	-	Organic oxygen compounds	Organooxygen compounds	Carbohydrates and carbohydrate conjugates	-	87.8	-	-	2.241	2.2392	2.5219	4.922e-05	0.0004942	4.5856	4.1413	4.2182	1.6982	1.766	1.6697
neg_2181	Gamma-Diosphenol	metab_11181	yes	down	-	neg	54783-36-7	213.113	2.20167	M+FA-H	C10H16O2	-	38.5	HMDB0037014	-	-	-	-	-	Lipids and lipid-like molecules	Prenol lipids	Monoterpenoids	-	38.5	-	-	1.6901	1.6883	0.5373	0.0008638	0.003688	1.7528	1.7523	1.7483	3.5608	3.2379	2.978
neg_2203	D-1-Deoxy-erythro-hexo-2,3-diulose	metab_11203	yes	up	-	neg	-	183.029	2.24608	M+Na-2H	C6H10O5	-	65.2	HMDB0029934	-	-	-	-	-	Organic oxygen compounds	Organooxygen compounds	Carbohydrates and carbohydrate conjugates	-	65.2	-	-	1.8212	1.8197	1.6425	2.984e-06	6.734e-05	4.4436	4.3178	4.3743	2.7086	2.6151	2.6757
neg_2236	Citrusin D	metab_11236	yes	up	-	neg	65995-51-9	341.124	2.33608	M-H	C16H22O8	-	67	HMDB0039334	-	-	-	-	-	Lipids and lipid-like molecules	Fatty Acyls	Fatty acyl glycosides	-	67	-	-	2.031	2.0297	2.4861	4.763e-06	9.265e-05	3.5215	3.6902	3.4829	1.4298	1.4391	1.4328
neg_2293	Alloathyriol	metab_11293	yes	up	-	neg	67370-97-2	319.046	2.45027	M+FA-H	C14H10O6	-	77.6	HMDB0038715	-	-	-	-	-	Organoheterocyclic compounds	Benzopyrans	1-benzopyrans	-	77.6	-	-	2.6081	2.6059	3.0733	1.789e-07	1.084e-05	5.2831	5.1243	5.1916	1.688	1.6975	1.691
neg_2303	Camelliaside B	metab_11303	yes	up	-	neg	131573-90-5	763.151	2.45027	M+K-2H	C32H38O19	-	69	HMDB0038767;LMPK12111750	-	-	-	-	-	Phenylpropanoids and polyketides	Flavonoids	Flavonoid glycosides	-	69	-	-	2.647	2.6447	2.7607	3.819e-07	1.64e-05	5.6169	5.6692	5.7093	2.0548	1.9623	2.1382
neg_2306	5-Hydroxyvalproic acid	metab_11306	yes	up	C16650	neg	53660-23-4	181.086	2.47328	M+Na-2H	C8H16O3	-	42.4	PW_C008640;HMDB0013898	-	-	-	-	-	Lipids and lipid-like molecules	Fatty Acyls	Fatty acids and conjugates	-	42.4	-	-	1.6067	1.6052	1.5424	2.511e-05	0.000311	3.7033	3.8744	3.8186	2.3976	2.51	2.481
neg_2320	(-)-Shikimic acid	metab_11320	yes	up	C00493	neg	138-59-0	173.045	2.496	M-H	C7H10O5	65.7	-	HMDB0003070	-	-	map01100;map00400;map01110;map01230;map01240	Metabolism;Metabolism;Metabolism;Metabolism;Metabolism	Global and overview maps;Amino acid metabolism;Global and overview maps;Global and overview maps;Global and overview maps	Organic oxygen compounds	Organooxygen compounds	Alcohols and polyols	65.7	-	Metabolic pathways;Phenylalanine, tyrosine and tryptophan biosynthesis;Biosynthesis of secondary metabolites;Biosynthesis of amino acids;Biosynthesis of cofactors	Metabolic pathways;Phenylalanine, tyrosine and tryptophan biosynthesis;Biosynthesis of secondary metabolites;Biosynthesis of amino acids;Biosynthesis of cofactors	1.3606	1.3591	1.3317	2.666e-05	0.0003237	3.8878	3.7786	3.8726	2.8659	2.8554	2.944
neg_2377	3,4,5-trihydroxy-6-(2-methoxybenzoyloxy)oxane-2-carboxylic acid	metab_11377	yes	up	-	neg	-	349.057	2.58732	M+Na-2H	C14H16O9	-	66.8	-	-	-	-	-	-	-	-	-	-	66.8	-	-	2.1658	2.1637	2.531	6.618e-07	2.28e-05	4.0246	3.9136	4.0597	1.5763	1.5857	1.5793
neg_2386	7-hydroxy-1-oxo-1H-isochromene-3-carboxylic acid	metab_11386	yes	up	-	neg	-	205.014	2.61043	M-H	C10H6O5	-	61.9	-	-	-	-	-	-	-	-	-	-	61.9	-	-	2.0715	2.0702	2.1055	0.0002558	0.001542	4.1814	4.3274	4.3012	2.0532	1.7089	2.3224
neg_2404	Cymorcin diglucoside	metab_11404	yes	up	-	neg	-	489.198	2.63327	M-H	C22H34O12	-	48.3	HMDB0039386	-	-	-	-	-	Organic oxygen compounds	Organooxygen compounds	Carbohydrates and carbohydrate conjugates	-	48.3	-	-	2.1089	2.1067	2.1898	1.478e-06	3.982e-05	4.2011	4.1458	4.319	1.9239	1.9334	1.9269
neg_2484	2-Cinnamoyl-1,6-digalloyl-beta-D-glucopyranose	metab_11484	yes	up	-	neg	94356-17-9	635.105	2.77092	M+Na-2H	C29H26O15	-	42.1	HMDB0039192	-	-	-	-	-	Phenylpropanoids and polyketides	Tannins	Not Available	-	42.1	-	-	2.6476	2.6452	3.1641	9.677e-08	7.534e-06	5.2993	5.2071	5.3454	1.666	1.6755	1.6691
neg_2498	Rhoifolin	metab_11498	yes	up	C12627	neg	17306-46-6	623.163	2.79372	M+FA-H	C27H30O14	-	62.5	HMDB0038848;HMDB0303149	-	-	map00944	Metabolism	Biosynthesis of other secondary metabolites	Phenylpropanoids and polyketides	Flavonoids	Flavonoid glycosides	-	62.5	Flavone and flavonol biosynthesis	Flavone and flavonol biosynthesis	1.0347	1.0344	1.1614	0.004216	0.01096	4.204	4.2064	4.1771	3.4978	3.5311	3.8098
neg_2506	(S)-Multifidol 2-[apiosyl-(1->6)-glucoside]	metab_11506	yes	up	-	neg	467437-62-3	485.167	2.81658	M-H2O-H	C22H32O13	-	73	HMDB0039930	-	-	-	-	-	Organic oxygen compounds	Organooxygen compounds	Carbohydrates and carbohydrate conjugates	-	73	-	-	1.5751	1.5738	1.4482	2.54e-05	0.0003135	4.1452	4.1211	4.1803	2.9228	2.753	2.9182
neg_2508	7-Hydroxy-2-methyl-4-oxo-4H-1-benzopyran-5-carboxylic acid	metab_11508	yes	up	-	neg	-	219.029	2.83958	M-H	C11H8O5	-	73.5	HMDB0036346	-	-	-	-	-	Organoheterocyclic compounds	Benzopyrans	1-benzopyrans	-	73.5	-	-	2.2799	2.2785	2.2612	5.419e-06	0.0001016	4.8071	4.8698	4.7662	2.2481	2.1549	1.9843
neg_2547	Tamarixetin	metab_11547	yes	up	C10188	neg	603-61-2	363.072	2.90813	M+FA-H	C16H14O7	-	54.5	LMPK12110606;HMDB0002937	-	-	-	-	-	Phenylpropanoids and polyketides	Flavonoids	O-methylated flavonoids	-	54.5	-	-	2.7062	2.7037	10.5461	1.43e-07	9.16e-06	4.21	4.0778	4.2257	0.3929	0.3987	0.3948
neg_2591	5-Hydroxyconiferyl alcohol	metab_11591	yes	up	C12205	neg	1782-47-4	391.14	2.9984	2M-H	C10H12O4	-	53.9	HMDB0060398	-	-	map00940;map01110	Metabolism;Metabolism	Biosynthesis of other secondary metabolites;Global and overview maps	Benzenoids	Phenols	Methoxyphenols	-	53.9	Phenylpropanoid biosynthesis;Biosynthesis of secondary metabolites	Phenylpropanoid biosynthesis;Biosynthesis of secondary metabolites	2.259	2.2563	4.0623	0.009841	0.02109	3.6662	3.6104	4.102	0.3874	2.1288	0.2847
neg_2654	Quercetin-3-glucoside	metab_11654	yes	up	C05623	neg	482-35-9	463.089	3.1481	M-H	C21H20O12	97.1	-	HMDB0037362;HMDB0247252	-	-	map01100;map01110;map00944	Metabolism;Metabolism;Metabolism	Global and overview maps;Global and overview maps;Biosynthesis of other secondary metabolites	Phenylpropanoids and polyketides	Flavonoids	Flavonoid glycosides	97.1	-	Metabolic pathways;Biosynthesis of secondary metabolites;Flavone and flavonol biosynthesis	Metabolic pathways;Biosynthesis of secondary metabolites;Flavone and flavonol biosynthesis	3.1527	3.1503	9.3195	0.00053	0.002596	5.8009	5.8356	5.9083	0.1131	0.1154	1.654
neg_2707	Matairesinol	metab_11707	yes	up	C10682	neg	580-72-3	357.134	3.26223	M-H	C20H22O6	36	-	HMDB0035698	-	-	map01100;map01110;map00998	Metabolism;Metabolism;Metabolism	Global and overview maps;Global and overview maps;Biosynthesis of other secondary metabolites	Lignans, neolignans and related compounds	Furanoid lignans	Tetrahydrofuran lignans	36	-	Metabolic pathways;Biosynthesis of secondary metabolites;Biosynthesis of various secondary metabolites - part 2	Metabolic pathways;Biosynthesis of secondary metabolites;Biosynthesis of various secondary metabolites - part 2	1.4909	1.4903	1.492	0.0004624	0.002377	3.7504	3.4894	3.3774	2.36	2.3923	2.3631
neg_2719	5,7-Dihydroxy-4'-methoxy-8-methylisoflavanone	metab_11719	yes	up	-	neg	163021-16-7	345.098	3.28508	M+FA-H	C17H16O5	-	43.4	HMDB0041322	-	-	-	-	-	Phenylpropanoids and polyketides	Isoflavonoids	O-methylated isoflavonoids	-	43.4	-	-	2.0546	2.053	2.2761	6.321e-08	6.13e-06	3.8514	3.9249	3.8721	1.7019	1.7114	1.7049
neg_2759	3,8-Dihydroxy-9-methoxycoumestan	metab_11759	yes	up	-	neg	-	343.046	3.37632	M+FA-H	C16H10O6	-	79.5	HMDB0030562	-	-	-	-	-	Phenylpropanoids and polyketides	Isoflavonoids	Coumestans	-	79.5	-	-	2.8276	2.8253	8.7582	2.545e-07	1.318e-05	4.5483	4.7527	4.6636	0.5285	0.5353	0.5307
neg_2768	6,7-Dihydroxycoumarin	metab_11768	yes	up	C09263	neg	305-01-1	177.018	3.39918	M-H	C9H6O4	57.7	-	HMDB0030819	-	-	-	-	-	Phenylpropanoids and polyketides	Coumarins and derivatives	Hydroxycoumarins	57.7	-	-	-	1.4343	1.434	1.3147	0.0002958	0.001718	4.5968	4.5479	4.3526	3.4017	3.343	3.5218
neg_2778	Orientin 7,3'-dimethyl ether	metab_11778	yes	up	-	neg	89915-55-9	457.114	3.422	M-H2O-H	C23H24O11	-	77.1	HMDB0037450;LMPK12111047	-	-	-	-	-	Phenylpropanoids and polyketides	Flavonoids	Flavonoid glycosides	-	77.1	-	-	2.2966	2.2946	2.5762	2.905e-09	1.315e-06	4.4215	4.4466	4.4644	1.7213	1.7307	1.7243
neg_2821	6-(1-benzofuran-4-yloxy)-3,4,5-trihydroxyoxane-2-carboxylic acid	metab_11821	yes	up	-	neg	-	331.046	3.51303	M+Na-2H	C14H14O8	-	82	-	-	-	-	-	-	-	-	-	-	82	-	-	2.1825	2.1806	2.0784	1.883e-05	0.0002517	4.9418	4.5863	4.7142	2.2794	2.289	2.2825
neg_2822	4-Methoxybenzyl O-(2-sulfoglucoside)	metab_11822	yes	up	-	neg	-	361.057	3.51303	M-H2O-H	C14H20O10S	-	61.6	HMDB0034754	-	-	-	-	-	Organic oxygen compounds	Organooxygen compounds	Carbohydrates and carbohydrate conjugates	-	61.6	-	-	1.8916	1.8898	2.0063	0.002038	0.006801	3.9448	3.6971	3.8047	1.6423	2.4187	1.6453
neg_2826	Eriodictyol-7-O-glucoside	metab_11826	yes	up	-	neg	38965-51-4	449.11	3.51303	M-H	C21H22O11	92.9	-	HMDB0029544	-	-	-	-	-	Benzenoids	Benzene and substituted derivatives	Benzoic acids and derivatives	92.9	-	-	-	2.1807	2.1792	2.2761	4.5e-07	1.799e-05	4.3806	4.4447	4.3045	1.919	1.9285	1.922
neg_2864	3-(6-hydroxy-7-methoxy-2H-1,3-benzodioxol-5-yl)prop-2-enoic acid	metab_11864	yes	up	-	neg	-	259.025	3.60422	M+Na-2H	C11H10O6	-	41.1	-	-	-	-	-	-	-	-	-	-	41.1	-	-	1.8136	1.8124	1.4676	0.0003643	0.002001	5.2938	5.4116	5.5181	3.9379	3.6627	3.4553
neg_2872	3-Dehydroquinate	metab_11872	yes	up	C00944	neg	10534-44-8	211.024	3.62702	M+Na-2H	C7H10O6	-	69.6	HMDB0012710	-	-	map01100;map00400;map01110;map01230	Metabolism;Metabolism;Metabolism;Metabolism	Global and overview maps;Amino acid metabolism;Global and overview maps;Global and overview maps	Organic acids and derivatives	Hydroxy acids and derivatives	Alpha hydroxy acids and derivatives	-	69.6	Metabolic pathways;Phenylalanine, tyrosine and tryptophan biosynthesis;Biosynthesis of secondary metabolites;Biosynthesis of amino acids	Metabolic pathways;Phenylalanine, tyrosine and tryptophan biosynthesis;Biosynthesis of secondary metabolites;Biosynthesis of amino acids	1.9503	1.9487	1.6998	1.689e-06	4.444e-05	4.8504	4.712	4.7418	2.837	2.7806	2.798
neg_2878	Marmesin rhamnoside	metab_11878	yes	up	-	neg	142347-99-7	373.129	3.62702	M-H2O-H	C20H24O8	-	74.6	HMDB0039564	-	-	-	-	-	Phenylpropanoids and polyketides	Coumarins and derivatives	Furanocoumarins	-	74.6	-	-	1.5296	1.5274	1.4665	0.0001577	0.001098	3.8842	3.6854	3.9079	2.5215	2.7028	2.6021
neg_2895	Cortolone-3-glucuronide	metab_11895	yes	up	-	neg	56162-46-0	541.266	3.67257	M-H	C27H42O11	-	62.4	HMDB0010320	-	-	-	-	-	Lipids and lipid-like molecules	Steroids and steroid derivatives	Steroidal glycosides	-	62.4	-	-	1.0815	1.0815	1.144	0.001685	0.005911	4.9498	5.101	4.8419	4.2715	4.3936	4.3527
neg_2900	METHYL 7-DESHYDROXYPYROGALLIN-4-CARBOXYLATE	metab_11900	yes	up	-	neg	-	261.04	3.69532	M-H	C13H10O6	53.2	-	-	-	-	-	-	-	-	-	-	53.2	-	-	-	2.1027	2.1014	2.5368	7.356e-05	0.0006502	4.0616	3.6769	3.6305	1.4895	1.4988	1.4925
neg_2916	Apiosylglucosyl 4-hydroxybenzoate	metab_11916	yes	up	-	neg	223261-31-2	469.078	3.71818	M+K-2H	C18H24O12	-	56.8	HMDB0035318	-	-	-	-	-	Organic oxygen compounds	Organooxygen compounds	Carbohydrates and carbohydrate conjugates	-	56.8	-	-	2.3636	2.3619	2.6242	0.002766	0.007986	4.7609	4.9298	4.8882	1.4919	2.7551	1.3102
neg_2978	Epigallocatechin gallate	metab_11978	yes	up	C09731	neg	989-51-5	439.067	3.90032	M-H2O-H	C22H18O11	-	57.9	HMDB0003153	-	-	-	-	-	Phenylpropanoids and polyketides	Flavonoids	Flavans	-	57.9	-	-	2.7381	2.736	6.8299	0.002796	0.008044	4.7367	4.8041	4.6471	0.0782	1.9201	0.0787
neg_3067	HIERACIN	metab_12067	yes	up	-	neg	-	301.035	4.17323	M-H	C15H10O7	62.5	-	-	-	-	-	-	-	-	-	-	62.5	-	-	-	2.1813	2.1798	1.7371	0.0001806	0.001193	5.6767	5.8898	5.9734	3.6908	3.2307	3.1771
neg_3125	2-(3,5-dihydroxyphenyl)-3,5,6,7-tetrahydroxy-4H-chromen-4-one	metab_12125	yes	up	-	neg	-	299.02	4.37797	M-H2O-H	C15H10O8	-	45.9	-	-	-	-	-	-	-	-	-	-	45.9	-	-	2.5167	2.5148	2.8784	1.146e-05	0.0001768	4.9464	5.0165	5.0891	1.9726	1.6313	1.6249
neg_3137	Theaflavic acid	metab_12137	yes	up	-	neg	30407-93-3	449.052	4.42352	M+Na-2H	C21H16O10	-	48.6	HMDB0040609	-	-	-	-	-	Phenylpropanoids and polyketides	Flavonoids	Flavans	-	48.6	-	-	2.2723	2.2705	2.3546	0.006395	0.01509	4.8563	5.0204	4.9639	1.5521	3.1853	1.5645
neg_3196	4-Hydroxy-5-(3'-hydroxyphenyl)-valeric acid-3'-O-sulphate	metab_12196	yes	up	-	neg	-	311.02	4.71948	M+Na-2H	C11H14O7S	-	45.2	HMDB0059975	-	-	-	-	-	Lipids and lipid-like molecules	Fatty Acyls	Fatty acids and conjugates	-	45.2	-	-	2.0496	2.0478	1.7867	2.528e-08	3.576e-06	4.8908	4.9111	4.9495	2.7473	2.757	2.7504
neg_3202	Sulfasalazine	metab_12202	yes	up	C07316	neg	599-79-1	419.041	4.74223	M+Na-2H	C18H14N4O5S	-	71.8	HMDB0014933	-	-	-	-	-	Organoheterocyclic compounds	Azobenzenes	Not Available	-	71.8	-	-	2.4688	2.4666	2.8038	1e-06	2.965e-05	4.7741	4.9486	4.9393	1.7099	1.7194	1.8007
neg_3213	Lamivudine	metab_12213	yes	up	C07065	neg	134678-17-4	503.099	4.7878	2M+FA-H	C8H11N3O3S	-	51.5	HMDB0251826;HMDB0014847;PW_C009184	-	-	-	-	-	Nucleosides, nucleotides, and analogues	Nucleoside and nucleotide analogues	3''-thia pyrimidine nucleosides	-	51.5	-	-	2.4031	2.401	2.5481	2.095e-08	3.16e-06	4.8547	4.9193	4.9258	1.9188	1.9284	1.9219
neg_3352	Cibaric acid	metab_12352	yes	down	-	neg	130523-93-2	305.176	5.58167	M-H2O-H	C18H28O5	-	57.1	HMDB0038580;LMFA02000289	-	-	-	-	-	Lipids and lipid-like molecules	Fatty Acyls	Lineolic acids and derivatives	-	57.1	-	-	1.0693	1.0719	0.8289	0.02383	0.0434	3.3261	3.2395	3.27	3.7615	3.7714	4.3336
neg_3601	LysoPA(20:3(5Z,8Z,11Z)/0:0)	metab_12601	yes	down	-	neg	-	505.257	7.06917	M+FA-H	C23H41O7P	-	50.9	HMDB0114747	-	-	-	-	-	Lipids and lipid-like molecules	Glycerophospholipids	Glycerophosphates	-	50.9	-	-	1.1481	1.1454	0.7936	0.004626	0.01179	2.7928	2.948	2.5287	3.4562	3.4378	3.5282
neg_3988	(3beta,5alpha,9alpha,14alpha,22E,24R)-3,5,9,14-Tetrahydroxyergosta-7,22-dien-6-one	metab_12987	yes	down	-	neg	211486-14-5	441.301	8.73403	M-H2O-H	C28H44O5	-	39.9	HMDB0032690	-	-	-	-	-	Lipids and lipid-like molecules	Steroids and steroid derivatives	Ergostane steroids	-	39.9	-	-	1.4294	1.4281	0.723	0.0004443	0.002316	2.7606	2.7642	2.8625	4.0498	3.823	3.7292
neg_4182	21-hydroxy-heneicosanoic acid	metab_13181	yes	down	-	neg	-	341.306	9.59508	M-H	C21H42O3	57.5	-	LMFA01050076	-	-	-	-	-	-	-	-	57.5	-	-	-	1.0491	1.0487	0.8741	0.002461	0.007324	4.1499	4.068	4.0972	4.7136	4.5432	4.8317
neg_4282	GPA(18:2/18:2)	metab_13281	yes	down	-	neg	-	695.466	10.1283	M-H	C39H69O8P	79.4	-	-	-	-	-	-	-	-	-	-	79.4	-	-	-	1.2883	1.287	0.8193	0.00581	0.01397	4.3107	4.0976	3.9979	5.1017	4.7773	5.2617
neg_5124	GPA(18:1/18:2)	metab_14123	yes	down	-	neg	-	697.482	10.307	M-H	C39H71O8P	85.2	-	-	-	-	-	-	-	-	-	-	85.2	-	-	-	1.2875	1.2856	0.8179	0.004767	0.01202	4.1885	4.0305	3.9583	5.1332	4.6765	5.0804
neg_5188	Cerebronic acid	metab_14187	yes	down	C17873	neg	544-57-0	383.353	9.98937	M-H	C24H48O3	-	68.2	HMDB0039540	-	-	-	-	-	Lipids and lipid-like molecules	Fatty Acyls	Fatty acids and conjugates	-	68.2	-	-	1.0386	1.0387	0.8886	0.003693	0.009872	4.6833	4.6649	4.6479	5.2015	5.1148	5.4351
neg_5195	DG(16:0/20:2(11Z,14Z)/0:0)	metab_14194	yes	up	C00165	neg	-	641.511	9.93125	M+Na-2H	C39H72O5	-	43.5	PW_C003160;HMDB0007109	-	-	-	-	-	Lipids and lipid-like molecules	Glycerolipids	Diradylglycerols	-	43.5	-	-	1.4316	1.4319	1.2931	0.003806	0.0101	4.9695	4.9313	4.8449	3.8351	3.4719	4.096
neg_5324	Annomuricin-D-one	metab_14323	yes	up	-	neg	-	633.438	9.31478	M+Na-2H	C35H64O8	-	70.4	HMDB0030890	-	-	-	-	-	Lipids and lipid-like molecules	Fatty Acyls	Fatty alcohols	-	70.4	-	-	1.3045	1.3035	1.2056	0.0008913	0.003765	5.187	5.2671	5.3579	4.453	4.1947	4.467
neg_5621	2-Pentadecylfuran	metab_14620	yes	down	-	neg	59958-20-2	323.259	8.41408	M+FA-H	C19H34O	-	66.8	HMDB0033609	-	-	-	-	-	Organoheterocyclic compounds	Heteroaromatic compounds	Not Available	-	66.8	-	-	1.2969	1.2953	0.8089	5.881e-05	0.0005591	3.7024	3.7076	3.6466	4.625	4.4721	4.5747
neg_5639	Pravastatin	metab_14638	yes	up	C01844	neg	81093-37-0	459.213	8.34532	M+Cl	C23H36O7	-	46.7	HMDB0256737;LMFA05000695;PW_C002369;HMDB0005022	-	-	-	-	-	Organoheterocyclic compounds	Lactones	Delta valerolactones	-	46.7	-	-	1.0442	1.0434	1.1532	0.002006	0.006722	4.4899	4.3321	4.3648	3.7413	3.752	3.9434
neg_5769	11(R)-HEDE	metab_14768	yes	up	-	neg	-	323.259	7.88552	M-H	C20H36O3	70.3	-	-	-	-	-	-	-	-	-	-	70.3	-	-	-	1.3717	1.3708	1.3801	1.045e-05	0.0001662	3.5901	3.4902	3.5077	2.5893	2.551	2.5296
neg_5787	LysoPA(0:0/18:2(9Z,12Z))	metab_14786	yes	down	-	neg	-	433.236	7.83945	M-H	C21H39O7P	-	86.2	HMDB0007852	-	-	-	-	-	Lipids and lipid-like molecules	Glycerophospholipids	Glycerophosphates	-	86.2	-	-	1.1236	1.1218	0.8647	0.005854	0.01403	4.6289	4.3777	4.2763	5.1661	4.9729	5.2239
neg_5961	3-?Methyl-?5-?propyl-2-?furantridecanoic acid	metab_14960	yes	down	-	neg	-	381.265	7.29117	M+FA-H	C21H36O3	-	58.7	HMDB0112079	-	-	-	-	-	Lipids and lipid-like molecules	Fatty Acyls	Fatty acids and conjugates	-	58.7	-	-	1.5135	1.5124	0.7398	1.108e-05	0.0001725	3.4292	3.3321	3.3467	4.4925	4.5698	4.5984
neg_6373	N-Benzoylanthranilic acid	metab_15372	yes	down	C03141	neg	579-93-1	240.066	5.46765	M-H	C14H11NO3	-	59.4	HMDB0032175	-	-	-	-	-	Benzenoids	Benzene and substituted derivatives	Benzoic acids and derivatives	-	59.4	-	-	1.2789	1.2785	0.7582	0.04583	0.07432	3.0962	3.6455	2.9282	3.701	4.3868	4.664
neg_6376	KOPARIN 2'-METHYL ETHER	metab_15375	yes	up	-	neg	-	313.072	5.44493	M-H	C17H14O6	66.7	-	-	-	-	-	-	-	-	-	-	66.7	-	-	-	1.824	1.8254	1.6532	0.002953	0.008388	4.602	5.0033	4.0688	2.8769	2.7472	2.6482
neg_6385	(+/-)alpha-CMBHC	metab_15384	yes	down	-	neg	-	319.192	5.39945	M-H	C19H28O4	39.8	-	-	-	-	-	-	-	-	-	-	39.8	-	-	-	1.2127	1.2127	0.797	0.008562	0.01895	3.2389	3.3279	3.0895	3.8326	3.9406	4.3437
neg_6412	Eupatorin	metab_15411	yes	up	-	neg	-	343.082	5.2423	M-H	C18H16O7	75.6	-	HMDB0252128;LMPK12111239	-	-	-	-	-	Phenylpropanoids and polyketides	Flavonoids	O-methylated flavonoids	75.6	-	-	-	1.3306	1.3334	1.409	0.0375	0.06306	3.7747	4.3855	3.1679	2.6874	2.5608	2.7911
neg_6444	Trans-3,3',4',5,5',7-Hexahydroxyflavanone	metab_15443	yes	up	-	neg	27200-12-0	319.046	5.1057	M-H	C15H12O8	-	83	HMDB0030835	-	-	-	-	-	Phenylpropanoids and polyketides	Flavonoids	Flavans	-	83	-	-	1.8757	1.8731	3.9814	6.733e-05	0.0006159	2.4585	2.2582	2.5891	0.533	0.6882	0.6135
neg_6453	MG(0:0/14:1(9Z)/0:0)	metab_15452	yes	down	-	neg	-	345.228	5.06018	M+FA-H	C17H32O4	-	53.5	HMDB0011531	-	-	-	-	-	Lipids and lipid-like molecules	Glycerolipids	Monoradylglycerols	-	53.5	-	-	1.1278	1.1301	0.8255	0.041	0.06761	3.8279	3.7811	3.6056	4.4949	4.9889	4.1008
neg_6506	Gomphidic acid	metab_15505	yes	up	-	neg	25328-77-2	393.025	4.83337	M+Na-2H	C18H12O9	-	58.1	HMDB0033542	-	-	-	-	-	Benzenoids	Phenols	Benzenetriols and derivatives	-	58.1	-	-	2.2308	2.2294	1.8807	0.0001464	0.001037	5.5224	5.4667	5.611	3.2985	2.7849	2.742
neg_6573	2-(3,4-dihydroxyphenyl)-5,7-dihydroxy-3,6-dimethoxy-4H-chromen-4-one	metab_15572	yes	up	-	neg	-	367.046	4.58297	M+Na-2H	C17H14O8	-	65.5	-	-	-	-	-	-	-	-	-	-	65.5	-	-	2.1636	2.1654	2.3337	0.01193	0.02463	4.5377	4.7806	4.6132	1.653	1.1558	3.1599
neg_6576	Diosmetin	metab_15575	yes	up	C10038	neg	520-34-3	299.056	4.58297	M-H	C16H12O6	63.8	-	LMPK12110824;HMDB0029676	-	-	-	-	-	Phenylpropanoids and polyketides	Flavonoids	O-methylated flavonoids	63.8	-	-	-	1.0984	1.0981	1.1774	0.03619	0.0613	5.0933	5.0378	4.6235	3.8112	4.43	4.2907
neg_6634	2-Keto-3-deoxy-6-phosphogluconic acid	metab_15632	yes	up	C04442	neg	27244-54-8	303.015	4.37797	M+FA-H	C6H11O9P	-	61.7	HMDB0001376	-	-	map01100;map00030;map01200	Metabolism;Metabolism;Metabolism	Global and overview maps;Carbohydrate metabolism;Global and overview maps	Organic acids and derivatives	Keto acids and derivatives	Medium-chain keto acids and derivatives	-	61.7	Metabolic pathways;Pentose phosphate pathway;Carbon metabolism	Metabolic pathways;Pentose phosphate pathway;Carbon metabolism	2.2365	2.2351	1.9499	0.0003379	0.001886	5.5217	5.1716	5.43	3.1625	2.5908	2.5148
neg_6694	4-(3-hydroxybutyl)-2-methoxyphenol	metab_15692	yes	up	-	neg	-	241.108	4.19597	M+FA-H	C11H16O3	-	47.2	-	-	-	-	-	-	-	-	-	-	47.2	-	-	1.382	1.3823	1.3298	0.01141	0.02381	4.4574	4.3573	4.2515	2.9822	3.1004	3.7431
neg_6774	1-Hydroxy-3-nonanone	metab_15772	yes	down	-	neg	67801-46-1	203.128	3.9913	M+FA-H	C9H18O2	-	43.3	LMFA05000601;HMDB0037143	-	-	-	-	-	Lipids and lipid-like molecules	Fatty Acyls	Fatty alcohols	-	43.3	-	-	1.7361	1.7357	0.5044	0.01987	0.03731	2.2504	1.8431	1.2719	3.7978	4.0239	2.8126
neg_6784	Eriodictyol	metab_15782	yes	up	C05631	neg	552-58-9	287.056	3.96858	M-H	C15H12O6	82.5	-	HMDB0005810;LMPK12140002	-	-	map01100;map00941;map01110	Metabolism;Metabolism;Metabolism	Global and overview maps;Biosynthesis of other secondary metabolites;Global and overview maps	Phenylpropanoids and polyketides	Flavonoids	Flavans	82.5	-	Metabolic pathways;Flavonoid biosynthesis;Biosynthesis of secondary metabolites	Metabolic pathways;Flavonoid biosynthesis;Biosynthesis of secondary metabolites	1.8147	1.8139	1.5444	4.409e-05	0.0004569	4.9668	4.903	4.6728	3.1352	3.1448	3.1382
neg_6815	1-O-Feruloylglucose	metab_15813	yes	up	-	neg	7196-71-6	377.088	3.90032	M+Na-2H	C16H20O9	-	66.2	HMDB0036938	-	-	-	-	-	Phenylpropanoids and polyketides	Cinnamic acids and derivatives	Hydroxycinnamic acids and derivatives	-	66.2	-	-	1.8008	1.7991	1.7205	0.0008293	0.003579	4.4249	3.8333	4.0052	2.2942	2.5166	2.3186
neg_6878	4''-O-Acetylafzelin	metab_15876	yes	up	-	neg	135618-17-6	519.114	3.74102	M+FA-H	C23H22O11	-	45.9	HMDB0039746	-	-	-	-	-	Phenylpropanoids and polyketides	Flavonoids	Flavonoid glycosides	-	45.9	-	-	2.1503	2.1483	2.2188	1.366e-07	8.916e-06	4.3506	4.2845	4.3836	1.9516	1.9612	1.9547
neg_6890	Azlocillin	metab_15888	yes	up	C06839	neg	37091-66-0	496.11	3.71818	M+Cl	C20H23N5O6S	-	40.1	HMDB0015194	-	-	-	-	-	Organic acids and derivatives	Carboxylic acids and derivatives	Amino acids, peptides, and analogues	-	40.1	-	-	2.9939	2.9913	21.4754	2.946e-08	3.999e-06	4.7716	4.8672	4.9007	0.2239	0.2279	0.2252
neg_6893	Naringenin-7-O-glucoside	metab_15891	yes	up	-	neg	-	433.114	3.71818	M-H	C21H22O10	94.4	-	-	-	-	-	-	-	-	-	-	94.4	-	-	-	1.9672	1.9661	1.8064	0.009787	0.02101	4.8174	4.8453	4.9197	2.3206	3.6197	2.1339
neg_6919	8-hydroxy-6,7-dimethoxy-2H-chromen-2-one	metab_15917	yes	up	-	neg	-	243.03	3.67257	M+Na-2H	C11H10O5	-	36.4	-	-	-	-	-	-	-	-	-	-	36.4	-	-	2.4388	2.437	3.31	1.396e-06	3.87e-05	4.2965	4.526	4.3738	1.3253	1.3345	1.3282
neg_6957	Rosuvastatin 5 S-lactone	metab_15955	yes	up	-	neg	-	498.126	3.58143	M+Cl	C22H26FN3O5S	-	36	HMDB0060941	-	-	-	-	-	Organoheterocyclic compounds	Diazines	Pyrimidines and pyrimidine derivatives	-	36	-	-	2.1792	2.1772	2.3254	4.132e-06	8.525e-05	4.1608	4.3798	4.365	1.846	1.8555	1.849
neg_6969	Malvidin 3-O-glucoside	metab_15967	yes	up	C12140	neg	18470-06-9;7228-78-6	491.12	3.55868	M-H	C23H24O12	66.7	-	HMDB0030777	-	-	map00942	Metabolism	Biosynthesis of other secondary metabolites	Phenylpropanoids and polyketides	Flavonoids	Flavonoid glycosides	66.7	-	Anthocyanin biosynthesis	Anthocyanin biosynthesis	1.2652	1.265	1.2211	0.0003782	0.002052	4.6249	4.7738	4.5168	3.7785	3.792	3.826
neg_6971	S-Nitrosoglutathione	metab_15969	yes	up	-	neg	57564-91-7	371.041	3.55868	M+Cl	C10H16N4O7S	-	76.7	HMDB0004645;HMDB0257412	-	-	-	-	-	Organic acids and derivatives	Carboxylic acids and derivatives	Amino acids, peptides, and analogues	-	76.7	-	-	2.2431	2.2413	2.419	8.754e-08	7.246e-06	4.3698	4.4672	4.4297	1.8237	1.8332	1.8267
neg_6999	Vanillic acid-4-O-glucuronide	metab_15997	yes	up	-	neg	18191-12-3	363.072	3.51303	M+Na-2H	C15H18O9	-	84.7	HMDB0060024	-	-	-	-	-	Organic oxygen compounds	Organooxygen compounds	Carbohydrates and carbohydrate conjugates	-	84.7	-	-	2.8127	2.8102	13.1853	1.163e-05	0.0001781	4.7143	4.1948	4.3649	0.3333	0.3385	0.335
neg_7002	2-O-(6-Phospho-alpha-mannosyl)-D-glycerate	metab_16000	yes	up	C16699	neg	-	329.03	3.51303	M-H2O-H	C9H17O12P	-	73.6	HMDB0012152	-	-	-	-	-	Organic oxygen compounds	Organooxygen compounds	Carbohydrates and carbohydrate conjugates	-	73.6	-	-	3.0077	3.0052	35.3387	7.559e-12	2.565e-08	4.7947	4.8087	4.7934	0.1346	0.1372	0.1354
neg_7018	3,5,6,7-tetrahydroxy-2-phenyl-3,4-dihydro-2H-1-benzopyran-4-one	metab_16016	yes	up	-	neg	-	287.056	3.49032	M-H	C15H12O6	-	49.5	-	-	-	-	-	-	-	-	-	-	49.5	-	-	1.8759	1.8752	2.009	0.003559	0.009591	3.9091	3.7267	3.7565	1.5802	1.5897	2.5007
neg_7026	Quercitrin	metab_16024	yes	up	C01750	neg	522-12-3	469.078	3.46753	M+Na-2H	C21H20O11	-	62.9	HMDB0033751;HMDB0257017;LMPK12112171	-	-	map00944	Metabolism	Biosynthesis of other secondary metabolites	Phenylpropanoids and polyketides	Flavonoids	Flavonoid glycosides	-	62.9	Flavone and flavonol biosynthesis	Flavone and flavonol biosynthesis	2.4475	2.4453	2.97	3.074e-07	1.439e-05	4.5638	4.7043	4.7016	1.5635	1.5729	1.5665
neg_7096	Hesperetin	metab_16094	yes	up	C01709	neg	520-33-2	347.077	3.35355	M+FA-H	C16H14O6	-	74.2	HMDB0005782;LMPK12140003	-	-	map00941	Metabolism	Biosynthesis of other secondary metabolites	Phenylpropanoids and polyketides	Flavonoids	O-methylated flavonoids	-	74.2	Flavonoid biosynthesis	Flavonoid biosynthesis	1.9882	1.9863	1.781	2.185e-05	0.0002788	4.7016	4.6403	4.6425	2.4925	2.7851	2.5724
neg_7122	Glucorhein	metab_16120	yes	up	-	neg	34298-86-7	467.062	3.30795	M+Na-2H	C21H18O11	-	53.8	HMDB0032877	-	-	-	-	-	Benzenoids	Anthracenes	Anthracenecarboxylic acids and derivatives	-	53.8	-	-	2.3088	2.3055	2.1857	0.0006417	0.002967	5.1378	5.1211	5.2421	1.8282	2.8127	2.452
neg_7144	3-(3-hydroxyphenyl)-7-methoxy-3,4-dihydro-2H-1-benzopyran-4-one	metab_16142	yes	up	-	neg	-	315.088	3.28508	M+FA-H	C16H14O4	-	68.6	-	-	-	-	-	-	-	-	-	-	68.6	-	-	2.4164	2.4144	2.8546	2.019e-08	3.115e-06	4.5879	4.6601	4.6514	1.6188	1.6282	1.6218
neg_7156	Gibberellin A86	metab_16154	yes	up	-	neg	138703-93-2	401.124	3.26223	M+Na-2H	C19H24O8	-	76.2	HMDB0038450	-	-	-	-	-	Lipids and lipid-like molecules	Prenol lipids	Diterpenoids	-	76.2	-	-	1.6894	1.6871	1.6474	0.008808	0.01936	4.2393	4.0241	3.9034	1.8247	2.7965	2.7655
neg_7176	2,4',5,7-Tetrahydroxyflavanone	metab_16174	yes	up	-	neg	58124-18-8	333.062	3.23945	M+FA-H	C15H12O6	-	87.9	HMDB0040314	-	-	-	-	-	Phenylpropanoids and polyketides	Flavonoids	Hydroxyflavonoids	-	87.9	-	-	2.7756	2.7729	3.375	1.661e-07	1.025e-05	5.5814	5.6037	5.7448	1.6676	1.6771	1.6706
neg_7189	Pyridine N-oxide glucuronide	metab_16187	yes	up	-	neg	-	307.046	3.21655	M+Cl	C11H14NO7+	-	68.9	HMDB0061177	-	-	-	-	-	Organic oxygen compounds	Organooxygen compounds	Carbohydrates and carbohydrate conjugates	-	68.9	-	-	2.1647	2.1633	3.406	6.548e-07	2.268e-05	3.4501	3.4812	3.3367	1.001	1.0097	1.0038
neg_7205	6-Formylumbelliferone	metab_16203	yes	up	-	neg	-	235.024	3.1937	M+FA-H	C10H6O4	-	65.3	HMDB0039147	-	-	-	-	-	Phenylpropanoids and polyketides	Coumarins and derivatives	Hydroxycoumarins	-	65.3	-	-	2.2729	2.2714	2.8514	6.954e-07	2.349e-05	4.0729	4.2022	4.0417	1.4359	1.4452	1.4389
neg_7233	11,13-Dihydrotaraxinic acid glucosyl ester	metab_16231	yes	up	-	neg	75911-16-9	471.187	3.1481	M+FA-H	C21H30O9	-	80.4	HMDB0035867	-	-	-	-	-	Lipids and lipid-like molecules	Saccharolipids	Not Available	-	80.4	-	-	2.4514	2.4495	3.8729	0.001164	0.004533	4.3704	4.2962	4.2191	0.5705	0.9085	1.8491
neg_7288	Daphnetin	metab_16286	yes	up	C03093	neg	486-35-1	177.018	3.05855	M-H	C9H6O4	82.7	-	-	-	-	-	-	-	-	-	-	82.7	-	-	-	1.4402	1.4392	1.3329	3.578e-06	7.685e-05	4.3317	4.2698	4.2632	3.2527	3.1824	3.2161
neg_7310	Maleylacetoacetic acid	metab_16308	yes	up	C01036	neg	5698-52-2	221.009	3.0139	M+Na-2H	C8H8O6	-	47	HMDB0002052;PW_C001376;LMFA01170114	-	-	map01100;map00350	Metabolism;Metabolism	Global and overview maps;Amino acid metabolism	Organic acids and derivatives	Keto acids and derivatives	Medium-chain keto acids and derivatives	-	47	Metabolic pathways;Tyrosine metabolism	Metabolic pathways;Tyrosine metabolism	2.681	2.679	3.5815	3.051e-08	4.061e-06	5.1398	5.1982	5.0901	1.4349	1.4403	1.434
neg_7314	3,7-Dimethylquercetin	metab_16312	yes	up	C01265	neg	2068-02-02	375.072	2.9984	M+FA-H	C17H14O7	-	68.3	HMDB0029263	-	-	map00944	Metabolism	Biosynthesis of other secondary metabolites	Phenylpropanoids and polyketides	Flavonoids	O-methylated flavonoids	-	68.3	Flavone and flavonol biosynthesis	Flavone and flavonol biosynthesis	2.1199	2.1183	2.1352	3.226e-07	1.47e-05	4.3161	4.4297	4.3347	2.038	2.0476	2.0411
neg_7317	5-Methoxysalicylic acid	metab_16315	yes	up	-	neg	2612-02-04	167.034	2.9984	M-H	C8H8O4	70.9	-	HMDB0001868	-	-	-	-	-	Benzenoids	Benzene and substituted derivatives	Benzoic acids and derivatives	70.9	-	-	-	1.8276	1.8264	1.4125	3.576e-06	7.685e-05	5.9962	5.8935	5.832	4.1843	4.176	4.1864
neg_7330	(E)-8-Hydroxy-2-octene-4,6-diynoic acid	metab_16328	yes	up	-	neg	65367-65-9	195.029	2.97622	M+FA-H	C8H6O3	-	54.3	HMDB0031515	-	-	-	-	-	Lipids and lipid-like molecules	Fatty Acyls	Fatty acids and conjugates	-	54.3	-	-	1.7245	1.723	1.347	5.393e-06	0.0001014	6.0402	5.8907	5.9583	4.4323	4.3915	4.458
neg_7418	4-Hydroxy-6-methyl-3-(1-oxobutyl)-2H-pyran-2-one	metab_16416	yes	up	-	neg	22073-85-4	241.071	2.86252	M+FA-H	C10H12O4	-	57.9	HMDB0040637	-	-	-	-	-	Organic oxygen compounds	Organooxygen compounds	Carbonyl compounds	-	57.9	-	-	1.4246	1.4232	1.5476	0.0002555	0.001542	3.0834	2.9171	2.9794	1.8302	1.8995	2.0713
neg_7444	Shoyuflavone A	metab_16442	yes	up	-	neg	190712-87-9	407.041	2.81658	M+Na-2H	C19H14O9	-	40.1	HMDB0034582	-	-	-	-	-	Phenylpropanoids and polyketides	Isoflavonoids	Isoflav-2-enes	-	40.1	-	-	2.804	2.8017	22.8957	1.505e-10	1.588e-07	4.2528	4.2398	4.2217	0.1837	0.187	0.1847
neg_7448	(R)-Pelletierine	metab_16446	yes	down	-	neg	2858-66-4	186.113	2.81658	M+FA-H	C8H15NO	-	40.7	HMDB0030324	-	-	-	-	-	Organoheterocyclic compounds	Piperidines	Not Available	-	40.7	-	-	1.0471	1.0459	0.8542	0.02137	0.0396	3.8248	3.704	3.7559	4.7376	4.306	4.1684
neg_7525	Cordeauxione	metab_16523	yes	up	-	neg	1228-77-9	273.041	2.72493	M-H2O-H	C14H12O7	-	61.3	HMDB0034310	-	-	-	-	-	Organic acids and derivatives	Vinylogous acids	Not Available	-	61.3	-	-	2.5711	2.569	3.5916	1.329e-08	2.506e-06	4.6776	4.7533	4.739	1.3113	1.3205	1.3143
neg_7552	Quercetin 3-[rhamnosyl-(1->2)-alpha-L-arabinopyranoside]	metab_16550	yes	up	-	neg	86749-52-2	601.121	2.6791	M+Na-2H	C26H28O15	-	54	HMDB0037928	-	-	-	-	-	Phenylpropanoids and polyketides	Flavonoids	Flavonoid glycosides	-	54	-	-	2.0383	2.037	1.7634	8.253e-05	0.000702	4.9498	4.9639	5.041	3.085	2.7007	2.6942
neg_7557	Benzyl O-[arabinofuranosyl-(1->6)-glucoside]	metab_16555	yes	up	-	neg	88510-11-6	383.135	2.6791	M-H2O-H	C18H26O10	-	43.3	HMDB0041514	-	-	-	-	-	Organic oxygen compounds	Organooxygen compounds	Carbohydrates and carbohydrate conjugates	-	43.3	-	-	2.4086	2.4067	3.6423	1.329e-05	0.000197	4.1096	4.209	4.0848	1.0207	1.0294	1.3539
neg_7559	2,4,6-trihydroxy-2-[(4-hydroxyphenyl)methyl]-2,3-dihydro-1-benzofuran-3-one	metab_16557	yes	up	-	neg	-	287.056	2.6791	M-H	C15H12O6	-	63.5	-	-	-	-	-	-	-	-	-	-	63.5	-	-	1.8458	1.8443	1.6395	7.712e-06	0.0001325	4.4927	4.5742	4.4703	2.6633	2.8375	2.7558
neg_7601	Butyl salicylate	metab_16599	yes	up	-	neg	2052-14-4	239.092	2.63327	M+FA-H	C11H14O3	-	51.8	HMDB0040730	-	-	-	-	-	Benzenoids	Benzene and substituted derivatives	Benzoic acids and derivatives	-	51.8	-	-	1.3626	1.362	1.3341	0.001147	0.004484	4.1419	3.838	3.8191	2.9623	2.8446	3.0365
neg_7647	Myricetin	metab_16645	yes	up	C10107	neg	529-44-2	317.03	2.56447	M-H	C15H10O8	41.5	-	HMDB0002755;LMPK12110001	-	-	map00941;map01110;map00944	Metabolism;Metabolism;Metabolism	Biosynthesis of other secondary metabolites;Global and overview maps;Biosynthesis of other secondary metabolites	Phenylpropanoids and polyketides	Flavonoids	Flavones	41.5	-	Flavonoid biosynthesis;Biosynthesis of secondary metabolites;Flavone and flavonol biosynthesis	Flavonoid biosynthesis;Biosynthesis of secondary metabolites;Flavone and flavonol biosynthesis	2.5427	2.5401	2.6983	0.0002974	0.00172	5.3939	5.2927	5.4135	1.703	2.5576	1.7061
neg_7689	Phenylglucuronide	metab_16687	yes	up	-	neg	-	291.051	2.51885	M+Na-2H	C12H14O7	-	59.4	HMDB0059806	-	-	-	-	-	Organic oxygen compounds	Organooxygen compounds	Carbohydrates and carbohydrate conjugates	-	59.4	-	-	2.7689	2.7665	12.322	4.398e-06	8.807e-05	4.2269	4.3303	4.3683	0.3486	0.1631	0.5373
neg_7703	3-Glucosyl-2,3',4,4',6-pentahydroxybenzophenone	metab_16701	yes	up	-	neg	92631-83-9	423.094	2.496	M-H	C19H20O11	-	37	HMDB0032645	-	-	-	-	-	Organic oxygen compounds	Organooxygen compounds	Carbohydrates and carbohydrate conjugates	-	37	-	-	2.2176	2.2154	2.2449	1.736e-05	0.0002377	4.5198	4.5972	4.636	1.9407	2.2406	1.9438
neg_7705	3,4,5-trihydroxy-6-(1-oxo-1H-isochromene-3-carbonyloxy)oxane-2-carboxylic acid	metab_16703	yes	up	-	neg	-	347.041	2.496	M-H2O-H	C16H14O10	-	80.8	-	-	-	-	-	-	-	-	-	-	80.8	-	-	1.5434	1.5419	1.5489	0.000373	0.002035	3.7195	3.3315	3.5057	2.2675	2.2771	2.2705
neg_7759	Raffinose	metab_16757	yes	up	C00492	neg	512-69-6	541.12	2.42725	M+K-2H	C18H32O16	-	44	PW_C001805;HMDB0003213	-	-	map01100;map02010;map00052	Metabolism;Environmental Information Processing;Metabolism	Global and overview maps;Membrane transport;Carbohydrate metabolism	Organic oxygen compounds	Organooxygen compounds	Carbohydrates and carbohydrate conjugates	-	44	Metabolic pathways;ABC transporters;Galactose metabolism	Metabolic pathways;ABC transporters;Galactose metabolism	1.4998	1.4982	1.6162	0.0009417	0.003922	3.3527	2.882	3.1142	1.9234	1.9329	1.9265
neg_7775	Taxifolin 3-arabinoside	metab_16773	yes	up	-	neg	-	435.094	2.40465	M-H	C20H20O11	-	47.9	HMDB0041418	-	-	-	-	-	Phenylpropanoids and polyketides	Diarylheptanoids	Cyclic diarylheptanoids	-	47.9	-	-	1.676	1.6745	1.4819	6.437e-06	0.0001153	4.4301	4.4555	4.4999	3.0376	3.0671	2.9287
neg_7812	N-Feruloylaspartic acid	metab_16810	yes	down	-	neg	135068-96-1	308.078	2.3586	M-H	C14H15NO7	-	72.2	HMDB0040830	-	-	-	-	-	Organic acids and derivatives	Carboxylic acids and derivatives	Amino acids, peptides, and analogues	-	72.2	-	-	1.25	1.2478	0.7979	0.009325	0.02025	3.4011	3.7145	3.2262	4.3279	4.1102	4.5215
neg_7813	Wyeronic acid	metab_16811	yes	up	-	neg	117783-52-5	275.056	2.3586	M+FA-H	C13H10O4	-	45.9	HMDB0039141	-	-	-	-	-	Lipids and lipid-like molecules	Fatty Acyls	Fatty acids and conjugates	-	45.9	-	-	2.404	2.402	3.1501	1.152e-08	2.481e-06	4.4046	4.346	4.346	1.3822	1.3915	1.3852
neg_7838	Quercetin 3-O-glucoside	metab_16836	yes	up	C05623	neg	482-35-9;21637-25-2	463.089	2.31362	M-H	C21H20O12	33	-	HMDB0037362	-	-	map01100;map01110;map00944	Metabolism;Metabolism;Metabolism	Global and overview maps;Global and overview maps;Biosynthesis of other secondary metabolites	Phenylpropanoids and polyketides	Flavonoids	Flavonoid glycosides	33	-	Metabolic pathways;Biosynthesis of secondary metabolites;Flavone and flavonol biosynthesis	Metabolic pathways;Biosynthesis of secondary metabolites;Flavone and flavonol biosynthesis	2.538	2.5357	2.8078	1.275e-07	8.483e-06	5.1777	5.0851	5.2103	1.8649	1.8261	1.8196
neg_7908	4-(4-Hydroxyphenyl)-2-butanone glucoside	metab_16906	yes	up	-	neg	38963-94-9	371.135	2.2237	M+FA-H	C16H22O7	-	54.4	HMDB0034863	-	-	-	-	-	Organic oxygen compounds	Organooxygen compounds	Carbohydrates and carbohydrate conjugates	-	54.4	-	-	1.7416	1.7424	1.8119	0.002644	0.007733	3.7102	3.7383	3.5034	2.4762	1.856	1.7128
neg_7976	(S)C(S)S-S-Methylcysteine sulfoxide	metab_16973	yes	down	-	neg	32726-14-0	452.081	2.11192	3M-H	C4H9NO3S	-	34.2	HMDB0029432	-	-	-	-	-	Organic acids and derivatives	Carboxylic acids and derivatives	Amino acids, peptides, and analogues	-	34.2	-	-	1.5917	1.5942	0.4486	0.02873	0.05084	0.6991	0.8883	2.1457	2.8541	2.7962	2.6695
neg_7996	AESCULIN	metab_16993	yes	up	C09264	neg	531-75-9	339.072	2.0893	M-H	C15H16O9	36.9	-	HMDB0030820	-	-	-	-	-	Phenylpropanoids and polyketides	Coumarins and derivatives	Coumarin glycosides	36.9	-	-	-	2.2228	2.2215	2.3394	9.633e-05	0.0007811	4.4683	4.4706	4.522	2.2139	1.6524	1.8882
neg_8046	Furaneol 4-(6-malonylglucoside)	metab_17042	yes	up	-	neg	-	357.083	2.023	M-H2O-H	C15H20O11	-	72.7	HMDB0029778	-	-	-	-	-	Organic oxygen compounds	Organooxygen compounds	Carbohydrates and carbohydrate conjugates	-	72.7	-	-	1.6809	1.6802	1.5728	0.0007956	0.003484	4.237	4.0488	3.9971	2.5553	2.3767	2.8759
neg_8049	Theogallin	metab_17045	yes	up	C10834	neg	17365-11-6;53584-43-3	325.056	2.023	M-H2O-H	C14H16O10	-	70.7	HMDB0039287	-	-	-	-	-	Organic oxygen compounds	Organooxygen compounds	Alcohols and polyols	-	70.7	-	-	1.4253	1.4237	1.5562	0.004623	0.01179	3.4091	2.8464	3.0533	1.8868	1.8963	2.1997
neg_8059	1-Methyl-4-nitroimidazole	metab_17055	yes	up	C16621	neg	3034-41-1	108.02	2.023	M-H2O-H	C4H5N3O2	-	33	PW_C040688;HMDB0060659	-	-	-	-	-	Organoheterocyclic compounds	Azoles	Imidazoles	-	33	-	-	1.1866	1.1865	1.3416	0.002193	0.006836	2.8617	3.0749	2.9697	2.3629	2.0557	2.2198
neg_8110	(3,4,5,6-tetrahydroxyoxan-2-yl)methyl 4-hydroxybenzoate	metab_17106	yes	up	-	neg	-	345.083	1.95627	M+FA-H	C13H16O8	-	40.1	-	-	-	-	-	-	-	-	-	-	40.1	-	-	1.4627	1.4624	1.3487	0.0003061	0.001761	4.3903	4.307	4.2881	3.3622	3.2152	3.0489
neg_8138	Lepidimoic acid	metab_17134	yes	up	-	neg	157676-09-0	343.067	1.93463	M+Na-2H	C12H18O10	-	76.1	HMDB0041096	-	-	-	-	-	Organic oxygen compounds	Organooxygen compounds	Carbohydrates and carbohydrate conjugates	-	76.1	-	-	1.8139	1.8123	1.6101	1.217e-05	0.0001832	4.5412	4.4	4.5243	2.8692	2.7084	2.7857
neg_8145	5,7-Dihydroxy-4H-1-benzopyran-4-one	metab_17141	yes	up	C09001	neg	31721-94-5	223.024	1.93463	M+FA-H	C9H6O4	-	70.2	HMDB0032950	-	-	-	-	-	Organoheterocyclic compounds	Benzopyrans	1-benzopyrans	-	70.2	-	-	1.7011	1.7	1.5908	9.223e-06	0.0001516	4.1006	4.0007	3.983	2.5953	2.4639	2.5373
neg_8160	Benzyl beta-primeveroside	metab_17156	yes	up	-	neg	130622-31-0	401.145	1.91197	M-H	C18H26O10	-	58.2	HMDB0041190	-	-	-	-	-	Organic oxygen compounds	Organooxygen compounds	Carbohydrates and carbohydrate conjugates	-	58.2	-	-	1.6472	1.6451	1.581	0.0008125	0.00354	4.1174	3.6256	3.9388	2.4136	2.5907	2.386
neg_8183	N-Feruloylglycyl-L-phenylalanine	metab_17179	yes	up	-	neg	40747-82-8	435.093	1.88938	M+K-2H	C21H22N2O6	-	56.9	HMDB0029356	-	-	-	-	-	Organic acids and derivatives	Carboxylic acids and derivatives	Amino acids, peptides, and analogues	-	56.9	-	-	1.9234	1.9225	1.8404	0.001654	0.005851	4.2943	4.2698	4.4062	2.778	1.8852	2.384
neg_8290	3-Methoxy-4,5-methylenedioxybenzoic acid	metab_17286	yes	up	-	neg	526-34-1	241.035	1.77495	M+FA-H	C9H8O5	-	40.3	HMDB0030800	-	-	-	-	-	Benzenoids	Benzene and substituted derivatives	Benzoic acids and derivatives	-	40.3	-	-	1.0437	1.0426	1.1982	0.0001421	0.001026	3.472	3.3572	3.438	2.8495	2.8943	2.8234
neg_8620	Xanthine	metab_17615	yes	down	C00385	neg	69-89-6	151.025	1.39423	M-H	C5H4N4O2	81	-	PW_C000198;HMDB0000292	-	-	map01100;map01110;map00230;map00232	Metabolism;Metabolism;Metabolism;Metabolism	Global and overview maps;Global and overview maps;Nucleotide metabolism;Biosynthesis of other secondary metabolites	Organoheterocyclic compounds	Imidazopyrimidines	Purines and purine derivatives	81	-	Metabolic pathways;Biosynthesis of secondary metabolites;Purine metabolism;Caffeine metabolism	Metabolic pathways;Biosynthesis of secondary metabolites;Purine metabolism;Caffeine metabolism	1.0619	1.0614	0.8502	0.0001667	0.001135	3.3498	3.3139	3.3484	3.8834	4.0082	3.8843
neg_8698	Guanine	metab_17692	yes	down	C00242	neg	73-40-5	150.041	1.0313	M-H	C5H5N5O	91.8	-	HMDB0000132;PW_C000086	Nucleic acids	Bases	map01100;map00230	Metabolism;Metabolism	Global and overview maps;Nucleotide metabolism	Organoheterocyclic compounds	Imidazopyrimidines	Purines and purine derivatives	91.8	-	Metabolic pathways;Purine metabolism	Metabolic pathways;Purine metabolism	1.1714	1.1705	0.7846	8.797e-05	0.0007318	2.6605	2.5597	2.5603	3.2491	3.3442	3.3259
neg_8875	Arabinonic acid	metab_17869	yes	down	C00878	neg	488-30-2	165.039	0.64105	M-H	C5H10O6	-	63.6	HMDB0000539	-	-	map00053	Metabolism	Carbohydrate metabolism	Organic oxygen compounds	Organooxygen compounds	Carbohydrates and carbohydrate conjugates	-	63.6	Ascorbate and aldarate metabolism	Ascorbate and aldarate metabolism	1.0772	1.0757	0.8851	0.001317	0.004936	4.8532	4.7465	4.6132	5.3409	5.4156	5.3036
neg_8907	D-Glucarate	metab_17900	yes	down	C00818	neg	87-73-0	209.03	0.622617	M-H	C6H10O8	65.5	-	HMDB0000663	-	-	map01100;map00053	Metabolism;Metabolism	Global and overview maps;Carbohydrate metabolism	Organic oxygen compounds	Organooxygen compounds	Carbohydrates and carbohydrate conjugates	65.5	-	Metabolic pathways;Ascorbate and aldarate metabolism	Metabolic pathways;Ascorbate and aldarate metabolism	1.2692	1.2671	0.7816	0.003007	0.008498	3.2881	3.1609	2.8693	3.8715	4.0511	4.0004
neg_46	(-)-Epicatechin	metab_18184	yes	up	C09727	neg	490-46-0;154-23-4	289.072	2.04542	M+Na-2H, M+Cl, M-H	C15H14O6	92.1	-	HMDB0001871;HMDB0002780	-	-	map01100;map00941;map01110	Metabolism;Metabolism;Metabolism	Global and overview maps;Biosynthesis of other secondary metabolites;Global and overview maps	Phenylpropanoids and polyketides	Flavonoids	Flavans	92.1	-	Metabolic pathways;Flavonoid biosynthesis;Biosynthesis of secondary metabolites	Metabolic pathways;Flavonoid biosynthesis;Biosynthesis of secondary metabolites	1.7633	1.7681	2.1001	0.0209	0.03894	3.5655	3.556	3.326	2.1791	2.1106	0.6839
neg_8368	Ascorbic acid	metab_18186	yes	up	C00072	neg	50-81-7	197.008	1.70663	M+Na-2H	C6H8O6	-	58.8	HMDB0000044;PW_C000031	Vitamins and cofactors	Vitamins	map01100;map00480;map01110;map00053;map01240	Metabolism;Metabolism;Metabolism;Metabolism;Metabolism	Global and overview maps;Metabolism of other amino acids;Global and overview maps;Carbohydrate metabolism;Global and overview maps	Organoheterocyclic compounds	Dihydrofurans	Furanones	-	58.8	Metabolic pathways;Glutathione metabolism;Biosynthesis of secondary metabolites;Ascorbate and aldarate metabolism;Biosynthesis of cofactors	Metabolic pathways;Glutathione metabolism;Biosynthesis of secondary metabolites;Ascorbate and aldarate metabolism;Biosynthesis of cofactors	1.567	1.5657	1.4059	1.301e-05	0.0001937	4.3777	4.4327	4.3867	3.0829	3.0845	3.221
neg_7965	EPIGALLOCATECHIN	metab_18189	yes	up	C12127;C12136	neg	970-74-1;490-46-0;970-73-0	305.068	2.134	M-H	C15H14O7	32	-	HMDB0302404;HMDB0038361;HMDB0001871;LMPK12020004;HMDB0038365	-	-	map00941;map01110	Metabolism;Metabolism	Biosynthesis of other secondary metabolites;Global and overview maps	Phenylpropanoids and polyketides	Flavonoids	Flavans	32	-	Flavonoid biosynthesis;Biosynthesis of secondary metabolites	Flavonoid biosynthesis;Biosynthesis of secondary metabolites	1.6076	1.6068	1.5606	0.003129	0.008705	4.212	3.7389	3.7159	2.3676	2.3201	2.7878
neg_6587	Phloretin	metab_18195	yes	up	C00774	neg	7507-89-3;60-82-2	273.077	4.53737	M-H	C15H14O5	55.7	-	LMPK12120525;HMDB0029646;HMDB0003306	-	-	map00941;map01110	Metabolism;Metabolism	Biosynthesis of other secondary metabolites;Global and overview maps	Organic oxygen compounds	Organooxygen compounds	Carbonyl compounds	55.7	-	Flavonoid biosynthesis;Biosynthesis of secondary metabolites	Flavonoid biosynthesis;Biosynthesis of secondary metabolites	2.1219	2.1206	2.3557	2.476e-06	5.775e-05	4.0491	4.1375	3.9339	1.711	1.7205	1.7141
