# Supplementary material for: Metabolomics Reveals Antioxidant Metabolites in Colored Rice Grains
Source: Metabolites. 2024 Feb 11;14(2):120. doi: 10.3390/metabo14020120 (PMC10891847; doi:10.3390/metabo14020120)
Supplement: Supplementary file 1 [file metabolites-14-00120-s001.zip › Table S6.xls]

## Sheet: Difference between groups
Table S6. DM information of YJN818 and HN comparison groups
ID	Metabolite	Metab ID	Significant	Regulate	KEGG Compound ID	Mode	CAS ID	M/Z	Retention time	Adducts	Formula	Fragmentation Score	Theoretical Fragmentation Score	Library ID	KEGG Compound First Category	KEGG Compound Second Category	KEGG Pathway ID	KEGG Pathway First Category	KEGG Pathway Second Category	HMDB Superclass	HMDB Class	HMDB Subclass	Fragmentation Score	Theoretical Fragmentation Score	KEGG Pathway Description	KEGG Pathway Description	VIP_pred_OPLS-DA	VIP_PLS-DA	FC(YJN818/HN)	P_value	FDR	YJN818_1	YJN818_2	YJN818_3	HN_1	HN_2	HN_3
pos_7	9,12,13-TriHOME	metab_6	yes	down	C14833	pos	-	353.229	5.31835	M+H-2H2O, M+Na, M+NH4, M+2Na-H, 2M+Na, 2M+K, M+H-H2O	C18H34O5	-	47.7	LMFA02000014;HMDB0004708	-	-	map00591	Metabolism	Lipid metabolism	Lipids and lipid-like molecules	Fatty Acyls	Fatty acids and conjugates	-	47.7	Linoleic acid metabolism	Linoleic acid metabolism	1.7228	1.7107	0.9258	0.005943	0.09289	6.1123	6.1128	6.1545	6.5494	6.7982	6.506
pos_14	PE(16:0/0:0)	metab_13	yes	up	-	pos	53862-35-4	454.293	8.02743	M+H, M+2Na-H, M+Na, 2M+Na, 2M+H, M+H-H2O	C21H44NO7P	98.4	-	LMGP02050002;HMDB0011503	-	-	-	-	-	Lipids and lipid-like molecules	Glycerophospholipids	Glycerophosphoethanolamines	98.4	-	-	-	1.0744	1.0675	1.0287	0.004127	0.07871	6.7527	6.7549	6.8316	6.6184	6.5549	6.5989
pos_21	Citric acid	metab_20	yes	down	C00158	pos	77-92-9	215.016	1.24843	M+H-H2O, M+NH4, M+Na, M+H, M+H-2H2O	C6H8O7	83.7	-	PW_C000063;HMDB0000094	Organic acids	Carboxylic acids	map01100;map00630;map01110;map01240;map01210;map01200;map01230;map00250;map00020	Metabolism;Metabolism;Metabolism;Metabolism;Metabolism;Metabolism;Metabolism;Metabolism;Metabolism	Global and overview maps;Carbohydrate metabolism;Global and overview maps;Global and overview maps;Global and overview maps;Global and overview maps;Global and overview maps;Amino acid metabolism;Carbohydrate metabolism	Organic acids and derivatives	Carboxylic acids and derivatives	Tricarboxylic acids and derivatives	83.7	-	Metabolic pathways;Glyoxylate and dicarboxylate metabolism;Biosynthesis of secondary metabolites;Biosynthesis of cofactors;2-Oxocarboxylic acid metabolism;Carbon metabolism;Biosynthesis of amino acids;Alanine, aspartate and glutamate metabolism;Citrate cycle (TCA cycle)	Metabolic pathways;Glyoxylate and dicarboxylate metabolism;Biosynthesis of secondary metabolites;Biosynthesis of cofactors;2-Oxocarboxylic acid metabolism;Carbon metabolism;Biosynthesis of amino acids;Alanine, aspartate and glutamate metabolism;Citrate cycle (TCA cycle)	1.1051	1.0973	0.9578	0.01473	0.1297	4.8368	4.7342	4.7239	5.0201	4.9033	5.0018
pos_23	12-Oxo-20-carboxy-leukotriene B4	metab_22	yes	up	-	pos	-	387.178	2.92713	M+H, M+NH4, M+Na, M+H-H2O, M+H-2H2O	C20H28O6	-	65.6	HMDB0012550;LMFA03020047	-	-	-	-	-	Lipids and lipid-like molecules	Fatty Acyls	Fatty acids and conjugates	-	65.6	-	-	1.0162	1.0119	1.0326	0.01921	0.1414	5.7841	5.7197	5.7658	5.6168	5.4873	5.6208
pos_31	9-OxoODE	metab_30	yes	down	C14766	pos	-	277.216	7.39763	M+H-H2O, M+H, M+Na, M+K, M+H-2H2O	C18H30O3	65.7	-	HMDB0004669;LMFA02000251;LMFA02000274	-	-	map00591	Metabolism	Lipid metabolism	Lipids and lipid-like molecules	Fatty Acyls	Lineolic acids and derivatives	65.7	-	Linoleic acid metabolism	Linoleic acid metabolism	1.7945	1.7928	0.9135	0.02978	0.1633	6.2535	6.1985	6.2027	6.4582	7.0359	6.9269
pos_82	3-Methyl-2-cyclohexen-1-one	metab_81	yes	down	-	pos	1193-18-6	111.081	5.31835	M+H-H2O, M+CH3OH+H, 2M+H, M+H	C7H10O	54.1	-	HMDB0031541	-	-	-	-	-	Organic oxygen compounds	Organooxygen compounds	Carbonyl compounds	54.1	-	-	-	1.0811	1.0718	0.9566	0.005796	0.09285	4.2512	4.2444	4.1901	4.4083	4.4786	4.3764
pos_161	P-Cresol glucuronide	metab_159	yes	down	-	pos	-	307.079	2.56753	M+H, M+Na, M+H-H2O	C13H16O7	-	49	HMDB0011686	-	-	-	-	-	Organic oxygen compounds	Organooxygen compounds	Carbohydrates and carbohydrate conjugates	-	49	-	-	1.5537	1.5455	0.9002	0.01103	0.117	3.7833	3.7005	3.612	3.9641	4.2278	4.1349
pos_204	Yucalexin P15	metab_201	yes	up	-	pos	119626-52-7	313.18	4.45065	M+H-H2O, M+NH4, M+H-2H2O	C20H26O4	-	62.9	HMDB0036753	-	-	-	-	-	Lipids and lipid-like molecules	Prenol lipids	Diterpenoids	-	62.9	-	-	1.3363	1.3376	1.0784	0.04174	0.1875	4.6807	4.6834	4.6272	4.5502	4.1932	4.2313
pos_206	3-[2-(3,7-dimethylocta-2,6-dien-1-yl)-3,4,6-trihydroxyphenyl]propanoic acid	metab_203	yes	up	-	pos	-	317.174	4.74642	M+H-H2O, M+H, M+Na	C19H26O5	-	32.9	-	-	-	-	-	-	-	-	-	-	32.9	-	-	1.3262	1.3331	1.0749	0.04815	0.2013	5.0041	4.8164	4.9132	4.7869	4.4607	4.4605
pos_210	9Z-Dodecen-7-ynyl acetate	metab_207	yes	down	-	pos	-	223.169	5.44428	M+H-2H2O, M+H, M+H-H2O	C14H22O2	51.7	-	LMFA07010247	-	-	-	-	-	-	-	-	51.7	-	-	-	1.1567	1.1439	0.9495	0.03236	0.1691	4.549	4.5466	4.4871	4.9046	4.7463	4.6571
pos_225	Cortol	metab_222	yes	up	C05482	pos	516-38-1	391.245	6.76637	M+H, M+Na, M+H-H2O	C21H36O5	-	35.3	LMST02030228;HMDB0003180	-	-	-	-	-	Lipids and lipid-like molecules	Steroids and steroid derivatives	Hydroxysteroids	-	35.3	-	-	1.6329	1.635	1.0904	0.002804	0.06608	5.3764	5.2542	5.2615	4.903	4.9211	4.7505
pos_231	PG(18:2(9Z,12Z)/0:0)	metab_228	yes	up	-	pos	-	491.277	7.63602	M+H-H2O, M+H, M+H-2H2O	C24H45O9P	47.1	-	LMGP04050014	-	-	-	-	-	-	-	-	47.1	-	-	-	1.3592	1.3535	1.0654	0.01605	0.1339	5.1687	5.1705	5.3513	5.0098	4.8333	4.885
pos_315	LPA(18:2(9Z,12Z)/0:0)	metab_312	yes	down	C00681	pos	-	435.25	7.8336	M+H, M+NH4, M+2Na-H	C21H39O7P	43.3	-	HMDB0007856;LMGP10050017;PW_C003907	-	-	map01100;map00564;map01110;map00561	Metabolism;Metabolism;Metabolism;Metabolism	Global and overview maps;Lipid metabolism;Global and overview maps;Lipid metabolism	Lipids and lipid-like molecules	Glycerophospholipids	Glycerophosphates	43.3	-	Metabolic pathways;Glycerophospholipid metabolism;Biosynthesis of secondary metabolites;Glycerolipid metabolism	Metabolic pathways;Glycerophospholipid metabolism;Biosynthesis of secondary metabolites;Glycerolipid metabolism	3.199	3.1858	0.6035	1.294e-05	0.00682	2.4664	2.454	2.3838	3.9852	3.9738	4.1468
pos_320	Methyl 9,10-epoxy-12,15-octadecadienoate	metab_317	yes	down	-	pos	-	309.242	7.89832	M+H-H2O, M+Na, M+H	C19H32O3	63.6	-	LMFA01070012	-	-	-	-	-	-	-	-	63.6	-	-	-	2.3099	2.2853	0.777	0.0344	0.1745	3.9191	3.365	2.8654	4.2644	4.3736	4.4253
pos_350	Geranyl hexanoate	metab_347	yes	up	-	pos	10032-02-7	253.216	5.38057	M+H-H2O, M+H, M+H-2H2O	C16H28O2	39.1	-	HMDB0029351	-	-	-	-	-	Lipids and lipid-like molecules	Fatty Acyls	Fatty alcohol esters	39.1	-	-	-	1.8425	1.8427	1.1534	0.002697	0.06462	4.2457	4.1729	4.1207	3.5373	3.775	3.5604
pos_357	4,4alpha,5,6-Tetrahydro-7-methyl-2(3H)-naphthalenone	metab_354	yes	down	-	pos	34545-88-5	195.138	5.31835	M+H, M+CH3OH+H, M+H-H2O	C11H14O	62.3	-	HMDB0039803	-	-	-	-	-	Organic oxygen compounds	Organooxygen compounds	Carbonyl compounds	62.3	-	-	-	1.6567	1.6463	0.9177	0.007257	0.101	5.1101	5.0982	5.1182	5.4624	5.7474	5.4909
pos_358	Cis-3-Hexenyl pentanoate	metab_355	yes	down	-	pos	35852-46-1	149.132	5.31835	M+H-2H2O, M+H-H2O, M+Na	C11H20O2	-	51.1	LMFA07010807;HMDB0031691	-	-	-	-	-	Lipids and lipid-like molecules	Fatty Acyls	Fatty acid esters	-	51.1	-	-	1.55	1.5388	0.9233	0.008934	0.1066	4.8681	4.8392	4.8383	5.1665	5.4205	5.1689
pos_385	Isorhamnetin-3-O-glucoside	metab_382	yes	up	-	pos	-	501.1	3.40565	M+Na, M+K, M+H	C22H22O12	97.9	-	-	-	-	-	-	-	-	-	-	97.9	-	-	-	1.6304	1.6286	1.1147	0.002666	0.06426	4.2774	4.2649	4.1093	3.7204	3.8473	3.7827
pos_395	Yucalexin B'11	metab_391	yes	up	-	pos	119642-80-7	285.185	3.13162	M+H-H2O, M+H, M+H-2H2O	C19H26O3	-	42.1	HMDB0036696	-	-	-	-	-	Organic oxygen compounds	Organooxygen compounds	Alcohols and polyols	-	42.1	-	-	1.0313	1.0247	1.0364	0.03452	0.1747	5.5587	5.5881	5.5223	5.4336	5.2444	5.4057
pos_424	Cyclomammeisin	metab_420	yes	up	-	pos	30563-62-3	445.161	2.26277	M+H, M+Na, M+H-H2O	C25H26O6	-	40	HMDB0030710	-	-	-	-	-	Phenylpropanoids and polyketides	Neoflavonoids	Prenylated neoflavonoids	-	40	-	-	1.4416	1.4378	1.1208	0.03599	0.1766	3.7317	3.5249	3.5157	3.297	2.9999	3.3165
pos_428	Gamma-Glu-Leu	metab_424	yes	down	-	pos	2566-39-4	261.144	2.15398	M+H, M+Na, M+H-2H2O	C11H20N2O5	88.3	-	HMDB0011171	-	-	-	-	-	Organic acids and derivatives	Carboxylic acids and derivatives	Amino acids, peptides, and analogues	88.3	-	-	-	1.9849	1.972	0.8635	0.0003438	0.02915	4.0285	3.8511	3.9105	4.5564	4.5198	4.5763
pos_429	Pro Ala Leu	metab_425	yes	down	-	pos	-	300.192	2.0689	M+H, M+K, M+Na	C14H25N3O4	73.4	-	-	-	-	-	-	-	-	-	-	73.4	-	-	-	2.2078	2.1972	0.756	0.002822	0.06629	2.4261	2.583	2.361	3.1234	3.4514	3.1753
pos_483	Stachyose	metab_479	yes	down	C01613	pos	10094-58-3;470-55-3;470-55-3	689.211	1.18488	M+NH4, M+Na, M+K	C24H42O21	53.1	-	PW_C001923;HMDB0003553	-	-	map01100;map00052	Metabolism;Metabolism	Global and overview maps;Carbohydrate metabolism	Organic oxygen compounds	Organooxygen compounds	Carbohydrates and carbohydrate conjugates	53.1	-	Metabolic pathways;Galactose metabolism	Metabolic pathways;Galactose metabolism	3.3846	3.3633	0.5892	0.002123	0.05911	2.6327	2.7613	2.55	4.9966	4.3106	4.1755
pos_606	(R)-b-amino-isobutyric acid	metab_601	yes	down	C01205	pos	-	104.071	0.6338	M+H-H2O, M+H	C4H9NO2	69.1	-	LMFA01100049	-	-	map00240;map01100;map00280	Metabolism;Metabolism;Metabolism	Nucleotide metabolism;Global and overview maps;Amino acid metabolism	-	-	-	69.1	-	Pyrimidine metabolism;Metabolic pathways;Valine, leucine and isoleucine degradation	Pyrimidine metabolism;Metabolic pathways;Valine, leucine and isoleucine degradation	2.3071	2.2921	0.8517	0.0005593	0.03684	4.9398	4.8624	4.7083	5.7671	5.596	5.6743
pos_741	D-1-[(3-Carboxypropyl)amino]-1-deoxyfructose	metab_735	yes	up	-	pos	10003-63-1	266.123	0.6519	M+H-H2O, M+H	C10H19NO7	-	70.1	HMDB0038663	-	-	-	-	-	Organic acids and derivatives	Carboxylic acids and derivatives	Amino acids, peptides, and analogues	-	70.1	-	-	1.9808	1.9905	1.21	0.03954	0.1831	4.758	4.1853	3.97	3.7128	3.449	3.5088
pos_767	5'-O-beta-D-Glucosylpyridoxine	metab_761	yes	up	C03996	pos	-	332.134	1.39762	M+H-H2O, M+H	C14H21NO8	37.4	-	HMDB0246884	-	-	-	-	-	Organoheterocyclic compounds	Pyridines and derivatives	Pyridoxines	37.4	-	-	-	1.0989	1.0988	1.038	0.02116	0.1445	5.9365	5.9112	5.7884	5.5932	5.6912	5.7088
pos_841	Val Val	metab_835	yes	down	-	pos	-	217.155	1.64665	M+H-H2O, M+H	C10H20N2O3	50.9	-	-	-	-	-	-	-	-	-	-	50.9	-	-	-	1.566	1.553	0.9012	0.002601	0.06352	3.6247	3.6555	3.5614	4.0337	4.0861	3.9096
pos_844	3,7,3',4'-Tetrahydroxy-8-methoxyflavone	metab_838	yes	up	-	pos	-	317.066	1.64665	M+H-H2O, M+H	C16H12O7	43.2	-	LMPK12111607	-	-	-	-	-	-	-	-	43.2	-	-	-	1.6307	1.6178	1.1699	0.01737	0.1391	3.2579	3.1811	3.0871	2.587	2.6269	2.9268
pos_845	Val Leu Ser	metab_839	yes	down	-	pos	-	318.202	1.64665	M+H, M+ACN+H	C14H27N3O5	60.8	-	-	-	-	-	-	-	-	-	-	60.8	-	-	-	1.9884	1.982	0.8042	0.01437	0.1292	2.8284	2.8502	2.7493	3.2105	3.7727	3.4964
pos_853	(+)-Muscarine	metab_847	yes	up	C07473	pos	300-54-9	174.149	1.66558	M+H-H2O, M+H	C9H19NO2	39.8	-	HMDB0029936	-	-	-	-	-	Organic oxygen compounds	Organooxygen compounds	Carbohydrates and carbohydrate conjugates	39.8	-	-	-	1.5522	1.5438	1.1016	0.01654	0.1354	4.4754	4.6767	4.4077	3.9692	4.1742	4.1662
pos_880	Asn Ile	metab_874	yes	down	-	pos	-	246.145	1.72755	M+H, M+Na	C10H19N3O4	86.6	-	-	-	-	-	-	-	-	-	-	86.6	-	-	-	1.4236	1.4077	0.8957	0.02707	0.158	3.2414	3.1593	2.9004	3.5068	3.4602	3.4174
pos_902	Leu Val Ala	metab_896	yes	down	-	pos	-	302.207	1.79115	M+H, M+Na	C14H27N3O4	61	-	-	-	-	-	-	-	-	-	-	61	-	-	-	2.33	2.3144	0.6952	7.916e-05	0.0177	1.9679	1.9555	1.8859	2.8184	2.8402	2.6965
pos_921	Procyanidin C1	metab_915	yes	up	C17624	pos	37064-30-5	867.212	1.83447	M+H, M+Na	C45H38O18	-	41.4	HMDB0038370	-	-	-	-	-	Phenylpropanoids and polyketides	Flavonoids	Biflavonoids and polyflavonoids	-	41.4	-	-	1.413	1.4132	1.0668	0.03417	0.1742	6.1277	5.8046	5.8372	5.4654	5.5319	5.6592
pos_1029	1-O-Sinapoylglucose	metab_1023	yes	up	-	pos	-	387.128	2.28422	M+H, M+NH4	C17H22O10	45.2	-	HMDB0041175	-	-	-	-	-	Phenylpropanoids and polyketides	Cinnamic acids and derivatives	Hydroxycinnamic acids and derivatives	45.2	-	-	-	1.0081	1.0018	1.0379	0.01203	0.1221	4.6985	4.7378	4.6952	4.4636	4.5742	4.5758
pos_1057	Gly Val Leu	metab_1051	yes	down	-	pos	-	288.192	2.3692	M+H, M+Na	C13H25N3O4	40.4	-	-	-	-	-	-	-	-	-	-	40.4	-	-	-	1.1049	1.1008	0.9453	0.0187	0.1414	3.7173	3.6969	3.6698	3.8127	4.0006	3.9134
pos_1089	(+)-Lyoniresinol 9-glucoside	metab_1083	yes	up	-	pos	-	600.265	2.54483	M+NH4, M+Na	C28H38O13	-	53.3	HMDB0041148	-	-	-	-	-	Lignans, neolignans and related compounds	Lignan glycosides	Not Available	-	53.3	-	-	1.7981	1.7992	1.1142	0.003527	0.07392	5.37	5.1871	5.0799	4.71	4.6793	4.644
pos_1165	5''-(4-Hydroxy-(E)-cinnamoyl) alpha-L-arabinofuranosyl-(1->3)-beta-D-xylopyranosyl-(1->4)-D-xylopyranoside	metab_1158	yes	down	-	pos	102254-69-3	599.14	2.83688	M+Na, M+K	C24H32O15	-	54.9	HMDB0041489	-	-	-	-	-	Organic oxygen compounds	Organooxygen compounds	Carbohydrates and carbohydrate conjugates	-	54.9	-	-	1.3019	1.3069	0.9309	0.0401	0.1844	4.322	4.4643	4.2609	4.5478	4.6227	4.8454
pos_1207	Echinone	metab_1200	yes	down	C10338	pos	80348-65-8	345.133	2.99538	M+H-H2O, M+H	C19H20O6	36.1	-	-	-	-	-	-	-	-	-	-	36.1	-	-	-	1.4078	1.4043	0.9071	0.02985	0.1633	3.6129	3.5318	3.4346	3.6953	3.9967	3.97
pos_1299	3,4,5-trihydroxy-6-[(4-oxo-2-phenyl-4H-chromen-3-yl)oxy]oxane-2-carboxylic acid	metab_1292	yes	down	-	pos	-	447.128	3.36	M+H, M+CH3OH+H	C21H18O9	-	40.4	-	-	-	-	-	-	-	-	-	-	40.4	-	-	1.8552	1.8485	0.7856	0.007626	0.1021	2.0329	2.3422	1.9889	2.7065	2.757	2.6377
pos_1303	11-trans-LTD4	metab_1296	yes	up	-	pos	-	497.268	3.38282	M+H-H2O, M+H	C25H40N2O6S	60.4	-	LMFA03020021	-	-	-	-	-	-	-	-	60.4	-	-	-	1.8416	1.847	1.2203	0.04232	0.189	3.7608	3.3688	3.6059	3.2758	2.6297	2.8932
pos_1310	4-hydroxy-5-(4-hydroxy-3-methoxyphenyl)pentanoic acid	metab_1303	yes	up	-	pos	-	263.091	3.40565	M+H, M+Na	C12H16O5	-	43.8	-	-	-	-	-	-	-	-	-	-	43.8	-	-	1.02	1.0173	1.0411	0.004955	0.08584	4.3556	4.3547	4.3638	4.1376	4.2424	4.1777
pos_1327	Lirioresinol A	metab_1320	yes	up	-	pos	21453-71-4	419.17	3.49672	M+H-2H2O, M+H	C22H26O8	40.2	-	HMDB0038928	-	-	-	-	-	Lignans, neolignans and related compounds	Furanoid lignans	Not Available	40.2	-	-	-	1.0091	1.0012	1.0343	0.001582	0.05191	4.9211	4.923	4.9092	4.7408	4.7277	4.7959
pos_1409	5-Hydroxy-7-(4-hydroxy-3-methoxyphenyl)-1-phenyl-3-heptanone	metab_1402	yes	down	-	pos	79559-61-8	311.164	3.9292	M+H-H2O, M+Na	C20H24O4	-	63	HMDB0029524	-	-	-	-	-	Phenylpropanoids and polyketides	Diarylheptanoids	Linear diarylheptanoids	-	63	-	-	1.5376	1.5172	0.885	0.0202	0.1434	3.2196	3.0764	3.1679	3.6901	3.6412	3.3639
pos_1440	Idebenone	metab_1433	yes	up	-	pos	-	361.199	4.17895	M+H, M+Na	C19H30O5	62.6	-	HMDB0253376	-	-	-	-	-	Not Available	Not Available	Not Available	62.6	-	-	-	1.1529	1.1529	1.0558	0.01447	0.1292	4.3882	4.3007	4.4344	4.2227	4.1079	4.0974
pos_1452	Testolic acid	metab_1445	yes	up	C01618	pos	-	321.206	4.29172	M+H, M+Na	C19H28O4	70.8	-	LMST02020081	-	-	-	-	-	-	-	-	70.8	-	-	-	1.4275	1.4276	1.0722	0.01596	0.1337	5.3261	5.1974	5.3913	5.0843	4.873	4.886
pos_1465	(8)-Gingerol	metab_1458	yes	up	C17495	pos	23513-08-8	323.222	4.17895	M+H, M+Na	C19H30O4	48.9	-	HMDB0033615	-	-	-	-	-	Benzenoids	Phenols	Methoxyphenols	48.9	-	-	-	1.4652	1.4655	1.0901	0.03546	0.1757	4.8139	4.6759	4.9506	4.5973	4.253	4.3955
pos_1474	Pindone	metab_1467	yes	up	C19141	pos	83-26-1	231.101	4.45065	M+H-H2O, M+H	C14H14O3	63.7	-	HMDB0256560	-	-	-	-	-	Benzenoids	Indanes	Indanones	63.7	-	-	-	1.57	1.5535	1.207	0.03429	0.1745	2.5574	2.4827	2.8309	1.991	2.2217	2.3104
pos_1477	3-Hydroxytetradecanedioic acid	metab_1470	yes	down	-	pos	73179-89-2	297.167	4.47343	M+H-2H2O, M+Na	C14H26O5	-	53.7	HMDB0000394	-	-	-	-	-	Lipids and lipid-like molecules	Fatty Acyls	Fatty acids and conjugates	-	53.7	-	-	1.5967	1.5785	0.9067	0.03304	0.1714	4.5544	4.3733	4.519	5.183	4.9209	4.7239
pos_1534	(all-E)-Crocetin	metab_1527	yes	up	-	pos	27876-94-4	329.175	5.03568	M+H-H2O, M+H	C20H24O4	43.1	-	HMDB0035098	-	-	-	-	-	Lipids and lipid-like molecules	Prenol lipids	Diterpenoids	43.1	-	-	-	1.5236	1.5291	1.1183	0.04536	0.1953	4.292	4.0735	4.2594	4.0327	3.5675	3.6885
pos_1554	2E,6E-Octadienal	metab_1547	yes	down	-	pos	-	107.086	5.31835	M+H-H2O, M+H	C8H12O	63.1	-	LMFA06000131	-	-	-	-	-	-	-	-	63.1	-	-	-	1.116	1.1066	0.9514	0.01501	0.1303	4.2333	4.1926	4.1509	4.3585	4.4992	4.3604
pos_1556	4,6-Decadiyn-1-ol	metab_1549	yes	down	-	pos	-	151.112	5.31835	M+H-H2O, M+H	C10H14O	-	76	HMDB0038913;LMFA05000629	-	-	-	-	-	Lipids and lipid-like molecules	Fatty Acyls	Fatty alcohols	-	76	-	-	1.0457	1.0355	0.9611	0.02441	0.1517	4.8321	4.7623	4.7276	4.9235	5.058	4.9199
pos_1582	3-(4-Isopropylphenyl)propanal	metab_1575	yes	down	-	pos	7775-00-0	177.127	5.31835	M+H-H2O, M+H	C12H16O	58	-	HMDB0036171	-	-	-	-	-	Lipids and lipid-like molecules	Prenol lipids	Monoterpenoids	58	-	-	-	1.2322	1.2224	0.9502	0.01447	0.1292	4.9985	4.9646	4.9652	5.1787	5.3607	5.1706
pos_1689	PC(12:0/0:0)	metab_1682	yes	up	-	pos	-	440.277	6.39768	M+H, M+Na	C20H42NO7P	80.5	-	HMDB0240697;LMGP01050009	-	-	-	-	-	Lipids and lipid-like molecules	Glycerophospholipids	Glycerophosphocholines	80.5	-	-	-	1.2177	1.2087	1.0543	0.02214	0.1454	5.0304	5.0179	5.2212	4.8534	4.7702	4.8618
pos_1697	PGF2alpha methyl ester	metab_1690	yes	up	-	pos	-	351.253	6.48265	M+H-H2O, M+Na	C21H36O5	31.8	-	LMFA03010115	-	-	-	-	-	-	-	-	31.8	-	-	-	1.1755	1.1834	1.0574	0.02235	0.1461	4.73	4.5593	4.5794	4.3921	4.4354	4.2882
pos_1747	C17 Sphinganine	metab_1740	yes	up	-	pos	-	288.29	6.9634	M+H-H2O, M+H	C17H37NO2	42.8	-	LMSP01040003	-	-	-	-	-	-	-	-	42.8	-	-	-	1.4505	1.4462	1.1139	0.005414	0.08995	3.4474	3.3828	3.4415	3.1787	2.9693	3.0745
pos_1816	Sterol	metab_1809	yes	down	C00370	pos	-	249.221	7.39763	M+H-H2O, M+H	C17H28O	34.2	-	HMDB0060512	-	-	-	-	-	Lipids and lipid-like molecules	Steroids and steroid derivatives	Hydroxysteroids	34.2	-	-	-	2.3487	2.345	0.807	0.01147	0.1195	3.9595	3.9694	3.9628	4.4864	5.1684	5.0807
pos_1844	PC(15:0/0:0)	metab_1837	yes	up	C04230	pos	-	482.326	7.59252	M+H, M+Na	C23H48NO7P	65.5	-	HMDB0010375;HMDB0010381;LMGP01050016	Lipids	Phospholipids	map00564	Metabolism	Lipid metabolism	Lipids and lipid-like molecules	Glycerophospholipids	Glycerophosphocholines	65.5	-	Glycerophospholipid metabolism	Glycerophospholipid metabolism	1.1766	1.1661	1.0425	0.01007	0.1115	5.6505	5.7592	5.7346	5.5386	5.4082	5.4987
pos_1850	PG(20:5(5Z,8Z,11Z,14Z,17Z)/0:0)	metab_1843	yes	up	-	pos	-	531.27	7.63602	M+H, M+Na	C26H43O9P	53.2	-	LMGP04050030	-	-	-	-	-	-	-	-	53.2	-	-	-	1.0663	1.0645	1.0436	0.01923	0.1414	4.7988	4.7843	4.8607	4.7061	4.5482	4.5878
pos_1876	15(S)-Hydroxyeicosatrienoic acid	metab_1869	yes	up	-	pos	13-16-1	355.284	7.85582	M+H-H2O, M+CH3OH+H	C20H34O3	-	74.5	HMDB0005045	-	-	-	-	-	Lipids and lipid-like molecules	Fatty Acyls	Eicosanoids	-	74.5	-	-	1.0849	1.0888	1.0431	0.01478	0.1298	5.0831	4.9707	5.0413	4.8762	4.8474	4.7493
pos_1880	PA(20:5(5Z,8Z,11Z,14Z,17Z)/0:0)	metab_1873	yes	down	-	pos	-	457.232	7.8336	M+H, M+2Na-H	C23H37O7P	33.4	-	LMGP10050033	-	-	-	-	-	-	-	-	33.4	-	-	-	1.9503	1.937	0.8629	0.0008356	0.04251	3.8834	3.8656	3.6759	4.4245	4.418	4.3956
pos_1886	Palmitic acid	metab_1879	yes	up	C00249	pos	1957-10-03	239.237	7.91952	M+H-H2O, M+H	C16H32O2	-	30.8	HMDB0303203;HMDB0000220;LMFA01010001;PW_C000145	Lipids	Fatty acids	map01100;map00071;map01212;map00073;map00061;map00062;map01040	Metabolism;Metabolism;Metabolism;Metabolism;Metabolism;Metabolism;Metabolism	Global and overview maps;Lipid metabolism;Global and overview maps;Lipid metabolism;Lipid metabolism;Lipid metabolism;Lipid metabolism	Lipids and lipid-like molecules	Fatty Acyls	Fatty acids and conjugates	-	30.8	Metabolic pathways;Fatty acid degradation;Fatty acid metabolism;Cutin, suberine and wax biosynthesis;Fatty acid biosynthesis;Fatty acid elongation;Biosynthesis of unsaturated fatty acids	Metabolic pathways;Fatty acid degradation;Fatty acid metabolism;Cutin, suberine and wax biosynthesis;Fatty acid biosynthesis;Fatty acid elongation;Biosynthesis of unsaturated fatty acids	1.1875	1.1942	1.072	0.02763	0.1594	3.9678	3.774	3.8728	3.6882	3.6348	3.5099
pos_1937	13(S)-HODE methyl ester	metab_1930	yes	down	-	pos	-	311.258	8.30415	M+H-H2O, M+H	C19H34O3	66.5	-	-	-	-	-	-	-	-	-	-	66.5	-	-	-	1.5899	1.5741	0.8953	0.01595	0.1337	3.7632	3.6767	3.6936	4.3451	4.1005	3.9903
pos_1995	LysoPE(18:3(6Z,9Z,12Z)/0:0)	metab_1988	yes	up	-	pos	-	476.274	8.88288	M+H, M+Na	C23H42NO7P	37.4	-	HMDB0011508	-	-	-	-	-	Lipids and lipid-like molecules	Glycerophospholipids	Glycerophosphoethanolamines	37.4	-	-	-	1.0445	1.0362	1.038	0.02384	0.1506	5.2239	5.2327	5.3786	5.1055	5.043	5.1072
pos_2082	DGDG(18:3/18:3)	metab_2075	yes	up	-	pos	-	959.569	9.39297	M+NH4, M+Na	C51H84O15	82.7	-	-	-	-	-	-	-	-	-	-	82.7	-	-	-	1.4538	1.4354	1.0731	0.0415	0.1869	5.6815	5.7426	5.7463	5.3278	5.1105	5.5611
pos_2094	Annomutacin	metab_2087	yes	down	-	pos	170900-29-5	647.485	9.47743	M+NH4, M+Na	C37H68O7	-	64.2	HMDB0031749	-	-	-	-	-	Lipids and lipid-like molecules	Fatty Acyls	Fatty alcohols	-	64.2	-	-	1.4493	1.4376	0.9342	0.02331	0.1492	5.2565	5.1675	5.3833	5.7699	5.664	5.4861
pos_2108	Neoannonin B	metab_2101	yes	down	-	pos	170312-94-4	629.475	9.58627	M+H-H2O, M+Na	C37H66O6	-	60.1	HMDB0037117	-	-	-	-	-	Lipids and lipid-like molecules	Fatty Acyls	Fatty alcohols	-	60.1	-	-	1.1923	1.177	0.9479	0.037	0.1783	4.7803	4.6015	4.7454	5.0774	4.97	4.8562
pos_2126	GPCho(18:2/18:2)	metab_2119	yes	up	-	pos	998-06-1	782.568	9.8817	M+H, M+Na	C44H80NO8P	71.1	-	HMDB0008138;HMDB0011310;HMDB0013435;HMDB0011277	-	-	-	-	-	Lipids and lipid-like molecules	Glycerophospholipids	Glycerophosphocholines	71.1	-	-	-	1.9476	1.9335	1.0985	0.0007078	0.04073	6.6725	6.7647	6.6304	6.036	6.0412	6.1883
pos_2129	PC(14:0/18:2(9Z,12Z))	metab_2122	yes	up	C00157	pos	92345-33-0	730.537	9.86005	M+H, M+Na	C40H76NO8P	-	33.4	PW_C003924;HMDB0007874;LMGP01010496	Lipids	Phospholipids	map01100;map00564;map01110;map00590;map00591;map00592	Metabolism;Metabolism;Metabolism;Metabolism;Metabolism;Metabolism	Global and overview maps;Lipid metabolism;Global and overview maps;Lipid metabolism;Lipid metabolism;Lipid metabolism	Lipids and lipid-like molecules	Glycerophospholipids	Glycerophosphocholines	-	33.4	Metabolic pathways;Glycerophospholipid metabolism;Biosynthesis of secondary metabolites;Arachidonic acid metabolism;Linoleic acid metabolism;alpha-Linolenic acid metabolism	Metabolic pathways;Glycerophospholipid metabolism;Biosynthesis of secondary metabolites;Arachidonic acid metabolism;Linoleic acid metabolism;alpha-Linolenic acid metabolism	1.8464	1.8357	1.1097	0.0004125	0.03203	5.4903	5.4444	5.4174	4.9022	4.8391	4.994
pos_2135	Cer(d16:1(4E)/20:0(2OH))	metab_2128	yes	up	-	pos	-	582.545	10.097	M+H-H2O, M+H	C36H71NO4	43.2	-	LMSP02010084	-	-	-	-	-	-	-	-	43.2	-	-	-	1.8871	1.8772	1.1478	0.00164	0.05261	4.3542	4.4392	4.5569	3.8779	3.9593	3.7935
pos_2140	GPCho(17:1/17:1)	metab_2133	yes	up	-	pos	-	758.569	10.2922	M+H, M+Na	C42H80NO8P	50.8	-	-	-	-	-	-	-	-	-	-	50.8	-	-	-	1.945	1.9346	1.0985	0.0002387	0.02412	6.6676	6.6748	6.6039	5.9743	6.0674	6.1183
pos_2146	GPEtn(14:1/22:2)	metab_2139	yes	up	-	pos	-	742.537	10.0106	M+H, M+Na	C41H76NO8P	97.9	-	HMDB0008876	-	-	-	-	-	Lipids and lipid-like molecules	Glycerophospholipids	Glycerophosphoethanolamines	97.9	-	-	-	1.1272	1.1273	1.0428	0.02492	0.1526	5.5611	5.565	5.5515	5.2197	5.4448	5.3296
pos_2152	GPEtn(18:2/18:2)	metab_2145	yes	up	-	pos	20707-71-5	740.522	9.83962	M+H, M+Na	C41H74NO8P	99	-	HMDB0011409;HMDB0011442;HMDB0009093	-	-	-	-	-	Lipids and lipid-like molecules	Glycerophospholipids	Glycerophosphoethanolamines	99	-	-	-	1.3746	1.3662	1.0548	0.0009766	0.04393	5.7581	5.8461	5.7733	5.4509	5.5242	5.5005
pos_2158	PE-NMe2(15:0/22:5(7Z,10Z,13Z,16Z,19Z))	metab_2151	yes	up	C04308	pos	-	780.552	9.67072	M+H, M+Na	C44H78NO8P	-	37.8	PW_C059952;HMDB0113936	-	-	map01100;map00564;map01110	Metabolism;Metabolism;Metabolism	Global and overview maps;Lipid metabolism;Global and overview maps	Lipids and lipid-like molecules	Glycerophospholipids	Glycerophosphoethanolamines	-	37.8	Metabolic pathways;Glycerophospholipid metabolism;Biosynthesis of secondary metabolites	Metabolic pathways;Glycerophospholipid metabolism;Biosynthesis of secondary metabolites	2.289	2.2712	1.176	0.002057	0.05831	5.5856	5.655	5.6602	4.8652	4.5639	4.9442
pos_2409	4-Hydroxystachydrine	metab_2402	yes	down	C08269	pos	515-25-3	192.123	0.556333	M+CH3OH+H	C7H13NO3	-	50.1	HMDB0029412;HMDB0029230	-	-	-	-	-	Organic acids and derivatives	Carboxylic acids and derivatives	Amino acids, peptides, and analogues	-	50.1	-	-	1.674	1.6577	0.8645	0.03898	0.1818	3.2131	3.368	3.3145	3.8697	4.0719	3.5076
pos_2452	4-Pyrimidine Methanamine (hydrochloride)	metab_2445	yes	down	-	pos	-	110.072	0.61585	M+H	C5H7N3	54	-	-	-	-	-	-	-	-	-	-	54	-	-	-	1.6286	1.6269	0.9065	0.001305	0.04836	4.1059	4.1883	4.1584	4.629	4.4839	4.6239
pos_2573	4-Acetamido-2-aminobutanoic acid	metab_2566	yes	down	C06442	pos	1190-46-1	125.071	1.00018	M+H-2H2O	C6H12N2O3	-	62	HMDB0031411	-	-	map01100;map00260	Metabolism;Metabolism	Global and overview maps;Amino acid metabolism	Organic acids and derivatives	Carboxylic acids and derivatives	Amino acids, peptides, and analogues	-	62	Metabolic pathways;Glycine, serine and threonine metabolism	Metabolic pathways;Glycine, serine and threonine metabolism	1.3225	1.317	0.9307	0.000374	0.03004	3.7211	3.7577	3.676	3.9855	3.9895	4.0114
pos_2696	L-Isoleucine	metab_2689	yes	down	C00407	pos	73-32-5;1509-34-8	132.102	1.54082	M+H	C6H13NO2	76.3	-	HMDB0000557;PW_C000112;HMDB0000172	Peptides	Amino acids	map01100;map01110;map00280;map00290;map01210;map00960;map02010;map01230;map00966;map00460;map00970	Metabolism;Metabolism;Metabolism;Metabolism;Metabolism;Metabolism;Environmental Information Processing;Metabolism;Metabolism;Metabolism;Genetic Information Processing	Global and overview maps;Global and overview maps;Amino acid metabolism;Amino acid metabolism;Global and overview maps;Biosynthesis of other secondary metabolites;Membrane transport;Global and overview maps;Biosynthesis of other secondary metabolites;Metabolism of other amino acids;Translation	Organic acids and derivatives	Carboxylic acids and derivatives	Amino acids, peptides, and analogues	76.3	-	Metabolic pathways;Biosynthesis of secondary metabolites;Valine, leucine and isoleucine degradation;Valine, leucine and isoleucine biosynthesis;2-Oxocarboxylic acid metabolism;Tropane, piperidine and pyridine alkaloid biosynthesis;ABC transporters;Biosynthesis of amino acids;Glucosinolate biosynthesis;Cyanoamino acid metabolism;Aminoacyl-tRNA biosynthesis	Metabolic pathways;Biosynthesis of secondary metabolites;Valine, leucine and isoleucine degradation;Valine, leucine and isoleucine biosynthesis;2-Oxocarboxylic acid metabolism;Tropane, piperidine and pyridine alkaloid biosynthesis;ABC transporters;Biosynthesis of amino acids;Glucosinolate biosynthesis;Cyanoamino acid metabolism;Aminoacyl-tRNA biosynthesis	1.4878	1.4829	0.9334	0.001004	0.04435	4.9982	4.9795	4.941	5.3367	5.2583	5.3878
pos_2749	PC(4:0/0:0)	metab_2742	yes	up	-	pos	-	328.151	1.68488	M+H	C12H26NO7P	69.2	-	LMGP01050061	-	-	-	-	-	-	-	-	69.2	-	-	-	1.7273	1.7051	1.1371	0.04491	0.1945	4.3142	4.8469	4.6215	3.811	4.1572	4.152
pos_2775	Okanin	metab_2768	yes	up	C08724	pos	484-76-4	289.071	1.76857	M+H	C15H12O6	68.5	-	LMPK12120181;HMDB0245776	-	-	-	-	-	Phenylpropanoids and polyketides	Linear 1,3-diarylpropanoids	Chalcones and dihydrochalcones	68.5	-	-	-	1.4229	1.4263	1.082	0.02435	0.1517	5.0157	4.7777	4.6986	4.384	4.4886	4.5211
pos_2822	Pro Val Val	metab_2815	yes	down	-	pos	-	314.207	1.92117	M+H	C15H27N3O4	86.6	-	-	-	-	-	-	-	-	-	-	86.6	-	-	-	1.8513	1.8504	0.809	0.01154	0.12	2.3184	2.6586	2.5351	2.9553	3.2617	3.0676
pos_2868	Luteolin-7-O-glucoside	metab_2861	yes	up	-	pos	-	449.108	2.08933	M+H	C21H20O11	85	-	-	-	-	-	-	-	-	-	-	85	-	-	-	2.0638	2.0768	1.1558	0.03706	0.1784	6.4683	5.8931	5.5789	5.2072	5.1978	5.1175
pos_2903	Hydroxyprolyl-Tyrosine	metab_2896	yes	up	-	pos	-	259.108	2.28422	M+H-2H2O	C14H18N2O5	-	45.6	HMDB0028875	-	-	-	-	-	Organic acids and derivatives	Carboxylic acids and derivatives	Amino acids, peptides, and analogues	-	45.6	-	-	1.9709	1.9705	1.3934	0.03513	0.1751	2.8123	2.4293	2.4422	2.1221	1.4676	1.9244
pos_2953	Pro Val Leu	metab_2946	yes	down	-	pos	-	328.223	2.45618	M+H	C16H29N3O4	79.1	-	-	-	-	-	-	-	-	-	-	79.1	-	-	-	1.4049	1.3991	0.906	0.00198	0.05797	3.0164	3.0741	3.1364	3.3998	3.4405	3.3447
pos_2960	Val Val Ile	metab_2953	yes	down	-	pos	-	330.239	2.47772	M+H	C16H31N3O4	87.2	-	-	-	-	-	-	-	-	-	-	87.2	-	-	-	2.0519	2.0416	0.788	0.0005401	0.03684	2.5126	2.5707	2.3661	3.102	3.1895	3.1626
pos_3030	Blumealactone A	metab_3023	yes	up	-	pos	111545-46-1	428.205	2.74753	M+ACN+Na	C20H28O6	-	65	HMDB0036665	-	-	-	-	-	Lipids and lipid-like molecules	Prenol lipids	Monoterpenoids	-	65	-	-	2.7873	2.7753	1.3938	8.637e-06	0.00682	4.2929	4.2413	4.356	3.0836	3.1273	3.0372
pos_3090	(3xi,6E)-1,7-Diphenyl-6-hepten-3-ol	metab_3083	yes	up	-	pos	87095-76-9	267.174	2.92713	M+H	C19H22O	43.9	-	HMDB0030146	-	-	-	-	-	Phenylpropanoids and polyketides	Diarylheptanoids	Linear diarylheptanoids	43.9	-	-	-	1.0671	1.0644	1.0482	0.04094	0.1857	4.7088	4.6182	4.6396	4.5163	4.3089	4.4996
pos_3159	(+)-cis-5,6-Dihydro-5-hydroxy-4-methoxy-6-(2-phenylethyl)-2H-pyran-2-one	metab_3152	yes	up	-	pos	52247-81-1	249.112	3.17693	M+H	C14H16O4	37.2	-	HMDB0029575	-	-	-	-	-	Phenylpropanoids and polyketides	Kavalactones	Not Available	37.2	-	-	-	1.2519	1.2466	1.0473	0.01713	0.1378	6.1019	6.1574	5.9539	5.8442	5.7301	5.8166
pos_3235	2-Octenedioic acid	metab_3228	yes	down	-	pos	5698-50-0	173.081	3.42863	M+H	C8H12O4	65	-	LMFA01170085;HMDB0000341	-	-	-	-	-	Lipids and lipid-like molecules	Fatty Acyls	Fatty acids and conjugates	65	-	-	-	1.4703	1.4617	0.9154	0.007535	0.1018	3.9057	3.9355	3.8767	4.4074	4.1924	4.2009
pos_3384	Normethandrolone	metab_3377	yes	up	C14491	pos	514-61-4	289.216	4.11113	M+H	C19H28O2	45.1	-	-	-	-	-	-	-	-	-	-	45.1	-	-	-	1.3413	1.3339	1.0746	0.002507	0.06268	4.2339	4.1766	4.205	3.9409	3.8347	3.9644
pos_3424	7-keto DHEA	metab_3417	yes	up	-	pos	-	303.195	4.38253	M+H	C19H26O3	76.8	-	-	-	-	-	-	-	-	-	-	76.8	-	-	-	1.3993	1.3985	1.0727	0.01928	0.1414	5.1177	4.9844	5.211	4.8806	4.6678	4.7252
pos_3545	7-Oxo-11-dodecenoic acid	metab_3538	yes	down	-	pos	-	213.148	5.31835	M+H	C12H20O3	73.1	-	LMFA01060182	-	-	-	-	-	-	-	-	73.1	-	-	-	1.8044	1.7938	0.8974	0.005872	0.09286	4.7026	4.7066	4.7343	5.1358	5.4538	5.1733
pos_3612	Oblongolide	metab_3605	yes	down	C09519	pos	97344-05-3	221.153	5.74065	M+H	C14H20O2	65.2	-	-	-	-	-	-	-	-	-	-	65.2	-	-	-	1.1216	1.1062	0.9432	0.02184	0.1448	3.6928	3.5647	3.6442	3.8621	3.9306	3.7677
pos_3783	L-Palmitoylcarnitine	metab_3776	yes	down	C02990	pos	2364-67-2	364.321	6.76637	M+H-2H2O	C23H45NO4	-	72.2	LMFA07070079;HMDB0000222;PW_C000147;HMDB0240774;LMFA07070004	-	-	map01212;map00071	Metabolism;Metabolism	Global and overview maps;Lipid metabolism	Lipids and lipid-like molecules	Fatty Acyls	Fatty acid esters	-	72.2	Fatty acid metabolism;Fatty acid degradation	Fatty acid metabolism;Fatty acid degradation	2.0545	2.0513	0.7619	0.04135	0.1868	2.3323	3.0757	2.2498	3.4683	3.3032	3.2809
pos_3869	Isoleucyl-Histidine	metab_3862	yes	up	-	pos	-	575.268	7.22493	2M+K	C12H20N4O3	-	50.2	HMDB0028909	-	-	-	-	-	Organic acids and derivatives	Carboxylic acids and derivatives	Amino acids, peptides, and analogues	-	50.2	-	-	1.05	1.0368	1.0382	0.02272	0.1473	5.1645	5.241	5.3234	5.0472	5.0033	5.0992
pos_3907	3-Caren-5-one	metab_3900	yes	down	-	pos	81800-50-2	151.112	7.39763	M+H	C10H14O	52.2	-	HMDB0035591	-	-	-	-	-	Lipids and lipid-like molecules	Prenol lipids	Monoterpenoids	52.2	-	-	-	1.9749	1.9716	0.8467	0.0229	0.1481	3.9076	3.8313	3.8245	4.1723	4.795	4.689
pos_4078	Tauroursodeoxycholic acid	metab_4071	yes	up	C16868	pos	14605-22-2	541.335	8.34655	M+ACN+H	C26H45NO6S	-	65.5	LMST05040015;HMDB0000874	-	-	-	-	-	Lipids and lipid-like molecules	Steroids and steroid derivatives	Bile acids, alcohols and derivatives	-	65.5	-	-	1.3755	1.3763	1.0666	0.003271	0.0716	5.0839	4.9436	5.005	4.7481	4.6979	4.6486
pos_4208	Jimenezin	metab_4201	yes	down	-	pos	204185-17-1	664.513	9.09357	M+ACN+H	C37H66O7	-	69	HMDB0032088	-	-	-	-	-	Lipids and lipid-like molecules	Fatty Acyls	Fatty alcohols	-	69	-	-	1.1807	1.1702	0.9455	0.03414	0.1742	4.4995	4.4436	4.2764	4.7295	4.5771	4.6774
pos_4213	Mactraxanthin	metab_4206	yes	down	-	pos	86105-69-3	669.47	9.11545	M+CH3OH+H	C40H60O6	-	53	HMDB0036928	-	-	-	-	-	Lipids and lipid-like molecules	Prenol lipids	Tetraterpenoids	-	53	-	-	1.3937	1.3787	0.9433	0.006296	0.09606	5.3561	5.2773	5.3328	5.6674	5.7243	5.5344
pos_4236	PE(16:0/P-18:1(11Z))	metab_4229	yes	down	-	pos	-	666.529	9.28592	M+H-2H2O	C39H76NO7P	-	33.2	HMDB0008951	-	-	-	-	-	Lipids and lipid-like molecules	Glycerophospholipids	Glycerophosphoethanolamines	-	33.2	-	-	1.6105	1.6011	0.9246	0.0001987	0.02199	4.9873	4.9871	5.0249	5.3992	5.4608	5.3628
pos_4881	PC(16:0/18:1(11Z))	metab_4874	yes	up	C00157	pos	-	760.584	10.7684	M+H	C42H82NO8P	-	71.4	PW_C004020;LMGP01010576;HMDB0007971	Lipids	Phospholipids	map01100;map00564;map01110;map00590;map00591;map00592	Metabolism;Metabolism;Metabolism;Metabolism;Metabolism;Metabolism	Global and overview maps;Lipid metabolism;Global and overview maps;Lipid metabolism;Lipid metabolism;Lipid metabolism	Lipids and lipid-like molecules	Glycerophospholipids	Glycerophosphocholines	-	71.4	Metabolic pathways;Glycerophospholipid metabolism;Biosynthesis of secondary metabolites;Arachidonic acid metabolism;Linoleic acid metabolism;alpha-Linolenic acid metabolism	Metabolic pathways;Glycerophospholipid metabolism;Biosynthesis of secondary metabolites;Arachidonic acid metabolism;Linoleic acid metabolism;alpha-Linolenic acid metabolism	2.2146	2.2083	1.1423	0.002013	0.05831	6.3842	6.4218	6.3177	5.4024	5.7709	5.571
pos_4904	GPCho(18:1/18:2)	metab_4897	yes	up	-	pos	17041-44-0	806.566	10.2702	M+Na	C44H82NO8P	81.8	-	HMDB0008072;HMDB0011310;HMDB0011244;HMDB0013425;HMDB0013429;HMDB0008105	-	-	-	-	-	Lipids and lipid-like molecules	Glycerophospholipids	Glycerophosphocholines	81.8	-	-	-	2.1464	2.1381	1.1357	0.0004209	0.03235	6.1171	6.1192	6.0706	5.2539	5.4813	5.3828
pos_4938	Cer(d16:2(4E,6E)/20:0(2OH))	metab_4931	yes	up	-	pos	-	580.53	9.92393	M+H	C36H69NO4	90.3	-	LMSP02010089	-	-	-	-	-	-	-	-	90.3	-	-	-	1.6166	1.6046	1.1014	0.007955	0.1041	4.6413	4.7817	4.7473	4.1353	4.3916	4.3365
pos_4958	DG(18:3(9Z,12Z,15Z)/16:0/0:0)	metab_4951	yes	down	C00165	pos	-	591.498	9.71402	M+H	C37H66O5	73.6	-	PW_C003352;HMDB0007301	-	-	-	-	-	Lipids and lipid-like molecules	Fatty Acyls	Lineolic acids and derivatives	73.6	-	-	-	2.0227	2.0033	0.8631	0.004891	0.08555	4.2482	4.1748	4.2281	5.0531	4.9447	4.6613
pos_5056	DG(18:4(6Z,9Z,12Z,15Z)/18:2(9Z,12Z)/0:0)	metab_5049	yes	down	C00165	pos	-	613.482	9.39297	M+H	C39H64O5	74.4	-	PW_C003386;HMDB0007335	-	-	-	-	-	Lipids and lipid-like molecules	Fatty Acyls	Lineolic acids and derivatives	74.4	-	-	-	1.5908	1.5825	0.925	0.0001251	0.01861	4.8683	4.9268	4.8839	5.3073	5.3147	5.2494
pos_5082	MG(0:0/15:0/0:0)	metab_5075	yes	down	-	pos	-	671.485	9.30762	2M+K	C18H36O4	-	35.7	HMDB0011532	-	-	-	-	-	Lipids and lipid-like molecules	Glycerolipids	Monoradylglycerols	-	35.7	-	-	1.8282	1.8141	0.9125	0.001164	0.04643	5.539	5.5578	5.5401	6.1537	6.1298	5.9507
pos_5409	Glycidyl oleate	metab_5402	yes	down	C19426	pos	5431-33-4	339.289	8.32553	M+H	C21H38O3	40.5	-	-	-	-	-	-	-	-	-	-	40.5	-	-	-	1.0587	1.0513	0.9645	0.01906	0.1414	5.3663	5.2853	5.4146	5.501	5.6196	5.5349
pos_5414	LysoPA(16:0/0:0)	metab_5407	yes	up	C04036	pos	-	393.24	8.30415	M+H-H2O	C19H39O7P	-	39.6	HMDB0007853	-	-	-	-	-	Lipids and lipid-like molecules	Glycerophospholipids	Glycerophosphates	-	39.6	-	-	1.356	1.3603	1.0613	0.006675	0.09867	5.4789	5.3615	5.3619	5.1096	5.1567	5.0015
pos_5567	Pregnanetriol	metab_5560	yes	down	-	pos	27178-64-9	337.273	7.81157	M+H	C21H36O3	-	54.1	HMDB0256756;HMDB0006070	-	-	-	-	-	Lipids and lipid-like molecules	Steroids and steroid derivatives	Pregnane steroids	-	54.1	-	-	1.0417	1.0414	0.9674	0.005971	0.09289	5.3805	5.3618	5.4583	5.5588	5.5718	5.6153
pos_5749	(+/-)-(Z)-2-(5-Tetradecenyl)cyclobutanone	metab_5742	yes	up	-	pos	173074-85-6	306.279	7.3556	M+ACN+H	C18H32O	-	71	HMDB0037543	-	-	-	-	-	Organic oxygen compounds	Organooxygen compounds	Carbonyl compounds	-	71	-	-	1.5934	1.5911	1.087	0.004264	0.07924	5.2798	5.1492	5.3481	4.9042	4.8507	4.76
pos_6214	8,13-dihydroxy-9,11-octadecadienoic acid	metab_6207	yes	down	-	pos	-	313.237	5.76187	M+H	C18H32O4	83.7	-	LMFA02000166	-	-	-	-	-	-	-	-	83.7	-	-	-	1.9243	1.9096	0.8845	0.001949	0.05797	4.5834	4.5739	4.5102	5.1112	5.3032	5.0379
pos_6245	(2Z,6E)-3,7,11,15,19-Pentamethyl-2,6-eicosadien-1-ol	metab_6238	yes	down	-	pos	26549-03-1	387.358	5.65583	M+Na	C25H48O	-	34.4	HMDB0035154	-	-	-	-	-	Lipids and lipid-like molecules	Prenol lipids	Sesterterpenoids	-	34.4	-	-	2.7064	2.6868	0.6955	0.03518	0.1751	3.3912	2.3002	3.4777	4.7881	4.1956	4.1969
pos_6253	Herculin	metab_6246	yes	down	-	pos	-	269.259	5.63333	M+NH4	C16H29NO	-	61.6	LMFA08020180;HMDB0030275	-	-	-	-	-	Lipids and lipid-like molecules	Fatty Acyls	Fatty amides	-	61.6	-	-	3.4167	3.4001	0.5963	0.0003104	0.02827	2.8055	2.6553	2.7019	4.8247	4.299	4.5645
pos_6346	1-Acetoxy-2-hydroxy-16-heptadecyn-4-one	metab_6338	yes	down	-	pos	24607-10-1	369.203	5.31835	M+2Na-H	C19H32O4	-	41.9	LMFA05000595;HMDB0031007	-	-	-	-	-	Lipids and lipid-like molecules	Fatty Acyls	Fatty alcohols	-	41.9	-	-	1.7512	1.7406	0.8866	0.007912	0.1041	4.0038	3.9905	4.0577	4.412	4.735	4.4468
pos_6359	(S)-(-)-Perillyl alcohol	metab_6351	yes	down	C02452	pos	536-59-4	135.117	5.31835	M+H-H2O	C10H16O	77.9	-	HMDB0003634	-	-	map01110;map00903;map00902	Metabolism;Metabolism;Metabolism	Global and overview maps;Metabolism of terpenoids and polyketides;Metabolism of terpenoids and polyketides	Lipids and lipid-like molecules	Prenol lipids	Monoterpenoids	77.9	-	Biosynthesis of secondary metabolites;Limonene and pinene degradation;Monoterpenoid biosynthesis	Biosynthesis of secondary metabolites;Limonene and pinene degradation;Monoterpenoid biosynthesis	1.1492	1.1379	0.9519	0.01236	0.1234	4.4793	4.4175	4.4049	4.6236	4.7495	4.6003
pos_6363	Chavicol	metab_6355	yes	down	C16930	pos	501-92-8	117.07	5.31835	M+H-H2O	C9H10O	-	50.9	HMDB0034107	-	-	map00940	Metabolism	Biosynthesis of other secondary metabolites	Benzenoids	Phenols	1-hydroxy-2-unsubstituted benzenoids	-	50.9	Phenylpropanoid biosynthesis	Phenylpropanoid biosynthesis	1.4028	1.3953	0.9116	0.007525	0.1018	3.3872	3.44	3.3891	3.6654	3.8619	3.677
pos_6421	3b,5a,6b-Cholestanetriol	metab_6413	yes	down	-	pos	1253-84-5	385.342	5.07925	M+H-2H2O	C27H48O3	-	45.2	HMDB0003990	-	-	-	-	-	Lipids and lipid-like molecules	Glycerophospholipids	Glycerophosphoethanolamines	-	45.2	-	-	2.7154	2.6895	0.6993	0.01882	0.1414	3.385	2.5201	3.0201	4.6965	4.0003	4.0643
pos_6503	Dihydroactinidiolide	metab_6494	yes	up	-	pos	15356-74-8	181.122	4.81433	M+H	C11H16O2	82.1	-	HMDB0035240	-	-	-	-	-	Organoheterocyclic compounds	Benzofurans	Not Available	82.1	-	-	-	1.1681	1.1625	1.0503	0.000198	0.02199	4.4585	4.5017	4.454	4.2584	4.2665	4.2449
pos_6599	Delta-12-Prostaglandin J2	metab_6590	yes	up	C05958	pos	87893-54-7	357.203	4.40528	M+Na	C20H30O4	-	34.7	PW_C002100;LMFA03010020;HMDB0004238	-	-	map00590;map01100	Metabolism;Metabolism	Lipid metabolism;Global and overview maps	Lipids and lipid-like molecules	Fatty Acyls	Eicosanoids	-	34.7	Arachidonic acid metabolism;Metabolic pathways	Arachidonic acid metabolism;Metabolic pathways	1.5398	1.5446	1.0964	0.03756	0.179	5.1921	4.983	5.0821	4.8982	4.4596	4.5597
pos_6602	Malvidin	metab_6593	yes	down	C08716	pos	643-84-5	331.081	4.40528	M+H	C17H14O7	76	-	LMPK12010004	-	-	-	-	-	-	-	-	76	-	-	-	1.2083	1.2072	0.9445	0.02997	0.1633	4.4295	4.5995	4.646	4.8987	4.8406	4.7372
pos_6668	5,7-Dihydroxy-3-methoxyflavone	metab_6659	yes	up	C11577	pos	6665-74-3	317.102	4.15628	M+CH3OH+H	C16H12O5	-	30.1	HMDB0029522;LMPK12111654	-	-	-	-	-	Phenylpropanoids and polyketides	Flavonoids	O-methylated flavonoids	-	30.1	-	-	3.0437	3.0219	2.4665	0.02312	0.1486	3.1938	2.7004	2.4002	0.7377	0.7121	1.9134
pos_6689	Dorsteniol	metab_6680	yes	up	-	pos	80794-85-0	263.091	4.11113	M+H	C14H14O5	36.2	-	HMDB0032838	-	-	-	-	-	Phenylpropanoids and polyketides	Coumarins and derivatives	Furanocoumarins	36.2	-	-	-	1.741	1.7342	1.1349	0.003433	0.07341	4.1928	4.256	4.0908	3.8049	3.5882	3.6555
pos_6736	15(R)-PGE1	metab_6727	yes	up	-	pos	-	337.237	3.95185	M+H-H2O	C20H34O5	72.9	-	-	-	-	-	-	-	-	-	-	72.9	-	-	-	1.6106	1.6077	1.1028	0.02482	0.1524	5.1657	4.9948	4.9015	4.7004	4.3405	4.6177
pos_6772	Acetoxy-6-gingerol	metab_6763	yes	up	-	pos	-	337.201	3.83782	M+H	C19H28O5	33	-	-	-	-	-	-	-	-	-	-	33	-	-	-	1.1955	1.1958	1.0556	0.01309	0.1265	4.7083	4.6496	4.764	4.5368	4.4688	4.371
pos_6813	5-Megastigmen-7-yne-3,9-diol 3-glucoside	metab_6804	yes	up	-	pos	62512-27-0	335.185	3.74668	M+H-2H2O	C19H30O7	-	40.3	HMDB0032842	-	-	-	-	-	Organic oxygen compounds	Organooxygen compounds	Carbohydrates and carbohydrate conjugates	-	40.3	-	-	1.0677	1.0688	1.0502	0.03147	0.1668	4.394	4.3733	4.4741	4.2998	4.2075	4.1019
pos_6907	PGH2	metab_6896	yes	up	C00427	pos	42935-17-1	335.221	3.54203	M+H-H2O	C20H32O5	71.7	-	HMDB0001381;LMFA03010010	Lipids	Eicosanoids	map01100;map00590	Metabolism;Metabolism	Global and overview maps;Lipid metabolism	Lipids and lipid-like molecules	Fatty Acyls	Eicosanoids	71.7	-	Metabolic pathways;Arachidonic acid metabolism	Metabolic pathways;Arachidonic acid metabolism	1.3472	1.3444	1.063	0.01923	0.1414	5.4835	5.3602	5.4131	5.2059	4.9501	5.1391
pos_6991	Isorhamnetin	metab_6979	yes	up	C10084	pos	480-19-3	317.065	3.40565	M+H	C16H12O7	84	-	HMDB0002655;LMPK12110002	-	-	-	-	-	Phenylpropanoids and polyketides	Flavonoids	Flavones	84	-	-	-	1.0709	1.0674	1.0539	0.03986	0.1842	4.178	4.1964	4.1238	3.8183	4.017	4.0243
pos_7029	Phe Gly	metab_7017	yes	down	-	pos	-	223.108	3.33705	M+H	C11H14N2O3	53.1	-	-	-	-	-	-	-	-	-	-	53.1	-	-	-	1.4101	1.3989	0.8489	0.04004	0.1844	2.1961	2.1553	1.8522	2.3776	2.5501	2.379
pos_7067	PGA3	metab_7055	yes	up	-	pos	-	333.205	3.26842	M+H	C20H28O4	80.4	-	LMFA03010140	-	-	-	-	-	-	-	-	80.4	-	-	-	1.061	1.0595	1.0405	0.04495	0.1945	5.6047	5.4748	5.4947	5.3783	5.1855	5.3672
pos_7069	4-Hydroxy-2H-pyran-3-carboxaldehyde	metab_7057	yes	down	-	pos	26110-68-9	275.055	3.26842	2M+Na	C6H6O3	-	58.2	HMDB0031256	-	-	-	-	-	Organoheterocyclic compounds	Pyrans	Not Available	-	58.2	-	-	1.9022	1.894	0.8004	0.01759	0.14	2.4117	2.381	2.8234	3.1611	3.3118	3.0428
pos_7107	Gibberellin A44	metab_7095	yes	up	C12308	pos	36434-15-8	347.185	3.2	M+H	C20H26O5	69.6	-	HMDB0036901;LMPR0104170030	-	-	-	-	-	Lipids and lipid-like molecules	Prenol lipids	Diterpenoids	69.6	-	-	-	1.2891	1.2841	1.0564	0.0002971	0.02774	4.9393	4.9191	4.9158	4.6997	4.6269	4.6585
pos_7190	Val Ile Leu	metab_7178	yes	down	-	pos	-	344.254	3.0869	M+H	C17H33N3O4	72.1	-	-	-	-	-	-	-	-	-	-	72.1	-	-	-	1.8212	1.8142	0.8255	0.02025	0.1434	2.9358	2.8085	2.576	3.1288	3.4461	3.5024
pos_7302	3-Hydroxy-1-methylestra-1,3,5(10),6-tetraen-17-one	metab_7290	yes	up	C15308	pos	-	283.169	2.92713	M+H	C19H22O2	40.9	-	-	-	-	-	-	-	-	-	-	40.9	-	-	-	1.1151	1.112	1.0531	0.009013	0.1066	4.2075	4.1035	4.2324	3.9986	3.9307	3.9815
pos_7368	Phe Ile	metab_7356	yes	down	-	pos	-	279.17	2.83688	M+H	C15H22N2O3	71.4	-	-	-	-	-	-	-	-	-	-	71.4	-	-	-	1.8479	1.8389	0.8374	0.007623	0.1021	3.0676	3.0326	2.7497	3.4453	3.492	3.6318
pos_7464	Asn Cys Lys Tyr	metab_7452	yes	down	-	pos	-	527.23	2.70265	M+H	C22H34N6O7S	57.3	-	-	-	-	-	-	-	-	-	-	57.3	-	-	-	2.2084	2.2121	0.8293	0.0218	0.1448	4.2916	4.0678	4.3187	5.3084	4.6464	5.3318
pos_7495	Ile Phe	metab_7483	yes	down	-	pos	-	279.17	2.65757	M+H	C15H22N2O3	53.1	-	-	-	-	-	-	-	-	-	-	53.1	-	-	-	1.4497	1.448	0.8909	0.0409	0.1857	3.3367	3.1227	3.1945	3.7061	3.3804	3.75
pos_7590	Glu Trp	metab_7578	yes	down	-	pos	-	334.14	2.47772	M+H	C16H19N3O5	61.6	-	-	-	-	-	-	-	-	-	-	61.6	-	-	-	1.1591	1.162	0.9429	0.03245	0.1693	4.0281	4.0439	4.1126	4.4408	4.1923	4.2916
pos_7639	Ala Val Leu	metab_7627	yes	down	-	pos	-	302.207	2.3692	M+H	C14H27N3O4	70	-	-	-	-	-	-	-	-	-	-	70	-	-	-	2.661	2.6528	0.5892	0.00353	0.07392	1.6994	1.6872	1.6183	2.459	3.0514	2.9836
pos_7642	Ile Leu	metab_7630	yes	down	-	pos	-	245.186	2.3692	M+H	C12H24N2O3	50	-	-	-	-	-	-	-	-	-	-	50	-	-	-	1.6272	1.6162	0.885	0.001638	0.05261	3.3447	3.3063	3.1617	3.6859	3.6917	3.71
pos_7652	Tyr Pro His	metab_7640	yes	down	-	pos	-	416.192	2.34803	M+H	C20H25N5O5	37.9	-	-	-	-	-	-	-	-	-	-	37.9	-	-	-	2.8742	2.8643	0.6732	0.0001069	0.01861	2.5558	2.8414	2.6415	3.9983	3.9672	3.9765
pos_7665	6-(3-hydroxybut-1-en-1-yl)-7-methoxy-2H-chromen-2-one	metab_7653	yes	up	-	pos	-	556.194	2.32748	2M+ACN+Na	C14H14O4	-	36.2	-	-	-	-	-	-	-	-	-	-	36.2	-	-	1.5829	1.5637	1.1257	0.007207	0.101	3.5689	3.7618	3.7933	3.2536	3.2511	3.3787
pos_7724	NESS 0327	metab_7712	yes	up	-	pos	-	489.1	2.21967	M+H	C24H23Cl3N4O	34.9	-	-	-	-	-	-	-	-	-	-	34.9	-	-	-	3.7641	3.7734	5.2802	0.02333	0.1492	4.0012	3.1257	2.3718	1.6852	0.0566	0.057
pos_7726	Pro Ile Tyr	metab_7714	yes	down	-	pos	-	392.218	2.21967	M+H	C20H29N3O5	63.4	-	-	-	-	-	-	-	-	-	-	63.4	-	-	-	1.6848	1.6757	0.8188	0.01391	0.1285	2.2311	2.2187	2.1487	2.5288	2.9083	2.6253
pos_7783	Cyanidin	metab_7771	yes	up	C05905	pos	13306-05-3;528-58-5	287.055	2.08933	M+H	C15H10O6	84.5	-	LMPK12010002;HMDB0244184;HMDB0002708	-	-	map01100;map00942;map00941;map01110	Metabolism;Metabolism;Metabolism;Metabolism	Global and overview maps;Biosynthesis of other secondary metabolites;Biosynthesis of other secondary metabolites;Global and overview maps	Organoheterocyclic compounds	Triazines	1,3,5-triazines	84.5	-	Metabolic pathways;Anthocyanin biosynthesis;Flavonoid biosynthesis;Biosynthesis of secondary metabolites	Metabolic pathways;Anthocyanin biosynthesis;Flavonoid biosynthesis;Biosynthesis of secondary metabolites	2.0888	2.1006	1.2002	0.0313	0.1666	5.3395	4.7697	4.4954	4.0705	4.086	4.0129
pos_7806	N17-Dimethylindole-3-carboxaldehyde	metab_7793	yes	up	-	pos	-	174.091	2.04663	M+H	C11H11NO	44.5	-	-	-	-	-	-	-	-	-	-	44.5	-	-	-	2.2456	2.2293	1.2944	0.0005543	0.03684	3.4765	3.5055	3.5308	2.7306	2.5622	2.8288
pos_7964	3'-Glucosyl-2',4',6'-trihydroxyacetophenone	metab_7950	yes	down	-	pos	88885-07-8	353.084	1.8122	M+Na	C14H18O9	-	37	HMDB0040621	-	-	-	-	-	Organic oxygen compounds	Organooxygen compounds	Carbohydrates and carbohydrate conjugates	-	37	-	-	1.9149	1.9058	0.7881	0.008995	0.1066	2.4077	2.0563	2.4429	2.8987	2.8618	3.0012
pos_8033	2-Keto-glutaramic acid	metab_8018	yes	down	C00940	pos	18465-19-5	308.106	1.72755	2M+NH4	C5H7NO4	-	68	HMDB0001552	-	-	map01100;map00250	Metabolism;Metabolism	Global and overview maps;Amino acid metabolism	Organic acids and derivatives	Keto acids and derivatives	Short-chain keto acids and derivatives	-	68	Metabolic pathways;Alanine, aspartate and glutamate metabolism	Metabolic pathways;Alanine, aspartate and glutamate metabolism	2.102	2.0942	0.7742	0.01918	0.1414	2.7286	2.3498	2.8741	3.6756	3.2381	3.3574
pos_8065	Cys Phe Glu	metab_8050	yes	down	-	pos	-	398.141	1.68488	M+H	C17H23N3O6S	44.4	-	-	-	-	-	-	-	-	-	-	44.4	-	-	-	1.2563	1.2481	0.9381	0.003655	0.07454	3.9464	3.8348	3.9591	4.1435	4.1951	4.1748
pos_8085	Pro Gln Val	metab_8070	yes	down	-	pos	-	343.197	1.66558	M+H	C15H26N4O5	49.6	-	-	-	-	-	-	-	-	-	-	49.6	-	-	-	2.1038	2.0909	0.7395	0.0002253	0.02375	2.0071	1.9948	1.9251	2.616	2.769	2.6304
pos_8090	Glu Met	metab_8075	yes	down	-	pos	-	279.101	1.66558	M+H	C10H18N2O5S	44.6	-	-	-	-	-	-	-	-	-	-	44.6	-	-	-	3.4246	3.4026	0.4536	0.001093	0.04506	1.6473	1.8602	1.155	3.5076	3.4978	3.2724
pos_8091	Val Pro Gly	metab_8076	yes	down	-	pos	-	272.16	1.66558	M+H	C12H21N3O4	62.7	-	-	-	-	-	-	-	-	-	-	62.7	-	-	-	2.185	2.1666	0.81	0.001359	0.04871	3.4166	3.2277	3.1004	3.9919	4.0629	3.9737
pos_8101	Ne,Ne dimethyllysine	metab_8086	yes	down	C05545	pos	-	157.134	1.66558	M+H-H2O	C8H18N2O2	-	30.6	HMDB0013287	-	-	map01100;map00310	Metabolism;Metabolism	Global and overview maps;Amino acid metabolism	Organic acids and derivatives	Carboxylic acids and derivatives	Amino acids, peptides, and analogues	-	30.6	Metabolic pathways;Lysine degradation	Metabolic pathways;Lysine degradation	1.9309	1.9157	0.8423	0.03712	0.1784	3.5668	3.6245	3.8372	4.2658	4.7639	4.0633
pos_8127	Zidovudine	metab_8112	yes	up	C07210	pos	30516-87-1	250.093	1.64665	M+H-H2O	C10H13N5O4	-	64.9	PW_C008998;HMDB0014638;HMDB0246088	-	-	-	-	-	Nucleosides, nucleotides, and analogues	Pyrimidine nucleosides	Pyrimidine 2'',3''-dideoxyribonucleosides	-	64.9	-	-	1.6572	1.6589	1.1648	0.03572	0.1761	3.5678	3.8026	3.5274	3.2784	3.2407	2.8385
pos_8157	4-Methyl-5-thiazoleethanol	metab_8142	yes	up	C04294	pos	137-00-8	144.048	1.62473	M+H	C6H9NOS	52.4	-	HMDB0032985	-	-	map00730;map01100;map01240	Metabolism;Metabolism;Metabolism	Metabolism of cofactors and vitamins;Global and overview maps;Global and overview maps	Organoheterocyclic compounds	Azoles	Thiazoles	52.4	-	Thiamine metabolism;Metabolic pathways;Biosynthesis of cofactors	Thiamine metabolism;Metabolic pathways;Biosynthesis of cofactors	1.5055	1.4988	1.1132	0.006873	0.09945	3.7554	3.8133	3.6106	3.4117	3.2658	3.3642
pos_8220	Piperidine	metab_8205	yes	down	C01746	pos	110-89-4	86.097	1.54082	M+H	C5H11N	51.3	-	HMDB0034301	-	-	map00960	Metabolism	Biosynthesis of other secondary metabolites	Organoheterocyclic compounds	Piperidines	Not Available	51.3	-	Tropane, piperidine and pyridine alkaloid biosynthesis	Tropane, piperidine and pyridine alkaloid biosynthesis	1.4228	1.419	0.9371	0.002221	0.05958	4.9237	4.9225	4.8655	5.2503	5.1512	5.2974
pos_8400	Nepsilon-Acetyl-L-lysine	metab_8384	yes	down	C02727	pos	692-04-6	189.123	1.01958	M+H	C8H16N2O3	78	-	HMDB0000206	-	-	map01100;map00310	Metabolism;Metabolism	Global and overview maps;Amino acid metabolism	Organic acids and derivatives	Carboxylic acids and derivatives	Amino acids, peptides, and analogues	78	-	Metabolic pathways;Lysine degradation	Metabolic pathways;Lysine degradation	1.3018	1.2893	0.9346	0.002615	0.06357	3.9381	3.8949	3.8691	4.2343	4.1751	4.1112
pos_8503	Diacetone alcohol	metab_8487	yes	down	-	pos	123-42-2	134.118	0.900083	M+NH4	C6H12O2	-	31.6	HMDB0031511	-	-	-	-	-	Organic oxygen compounds	Organooxygen compounds	Carbonyl compounds	-	31.6	-	-	3.63	3.6021	0.4689	0.0006784	0.04022	1.8724	1.8601	1.7907	4.1557	4.1309	3.4914
pos_8619	L-Aspartic acid	metab_8603	yes	up	C00049	pos	56-84-8	134.045	0.687917	M+H	C4H7NO4	65.2	-	PW_C000123;HMDB0000191	Peptides;Hormones and transmitters	Amino acids;Neurotransmitters	map01100;map00220;map01110;map00770;map00300;map01240;map01210;map00270;map01200;map00260;map01230;map00760;map00460;map00250;map00710;map00970;map00261;map02010;map00410;map00340	Metabolism;Metabolism;Metabolism;Metabolism;Metabolism;Metabolism;Metabolism;Metabolism;Metabolism;Metabolism;Metabolism;Metabolism;Metabolism;Metabolism;Metabolism;Genetic Information Processing;Metabolism;Environmental Information Processing;Metabolism;Metabolism	Global and overview maps;Amino acid metabolism;Global and overview maps;Metabolism of cofactors and vitamins;Amino acid metabolism;Global and overview maps;Global and overview maps;Amino acid metabolism;Global and overview maps;Amino acid metabolism;Global and overview maps;Metabolism of cofactors and vitamins;Metabolism of other amino acids;Amino acid metabolism;Energy metabolism;Translation;Bio…	Organic acids and derivatives	Carboxylic acids and derivatives	Amino acids, peptides, and analogues	65.2	-	Metabolic pathways;Arginine biosynthesis;Biosynthesis of secondary metabolites;Pantothenate and CoA biosynthesis;Lysine biosynthesis;Biosynthesis of cofactors;2-Oxocarboxylic acid metabolism;Cysteine and methionine metabolism;Carbon metabolism;Glycine, serine and threonine metabolism;Biosynthesis of amino acids;Nicotinate and nicotinamide metabolism;Cyanoamino acid metabolism;Alanine, aspartate a…	Metabolic pathways;Arginine biosynthesis;Biosynthesis of secondary metabolites;Pantothenate and CoA biosynthesis;Lysine biosynthesis;Biosynthesis of cofactors;2-Oxocarboxylic acid metabolism;Cysteine and methionine metabolism;Carbon metabolism;Glycine, serine and threonine metabolism;Biosynthesis of amino acids;Nicotinate and nicotinamide metabolism;Cyanoamino acid metabolism;Alanine, aspartate a…	1.3228	1.3306	1.068	0.04018	0.1844	5.4609	5.1324	5.1908	5.0214	4.8866	4.8714
pos_8679	Oxolan-3-one	metab_8663	yes	down	-	pos	22929-52-8	87.0446	0.6338	M+H	C4H6O2	35.3	-	HMDB0002523	-	-	-	-	-	Organoheterocyclic compounds	Dihydrofurans	Furanones	35.3	-	-	-	2.2893	2.2751	0.851	0.000758	0.04075	4.8556	4.7907	4.6084	5.6628	5.4881	5.6016
pos_8766	L-2-Amino-5-(methylthio)pentanoic acid	metab_8749	yes	down	C17213	pos	25148-30-5	164.074	0.556333	M+H	C6H13NO2S	-	53.2	HMDB0030406	-	-	map01210;map01110;map00966	Metabolism;Metabolism;Metabolism	Global and overview maps;Global and overview maps;Biosynthesis of other secondary metabolites	Organic acids and derivatives	Carboxylic acids and derivatives	Amino acids, peptides, and analogues	-	53.2	2-Oxocarboxylic acid metabolism;Biosynthesis of secondary metabolites;Glucosinolate biosynthesis	2-Oxocarboxylic acid metabolism;Biosynthesis of secondary metabolites;Glucosinolate biosynthesis	3.8683	3.8531	0.2572	0.0007546	0.04075	0.8351	1.2315	0.4147	3.2592	3.0176	3.3707
pos_8785	1,4,5,8-TETRAHYDROXY-2,6-DIMETHYLANTHROQUINONE	metab_8768	yes	down	-	pos	-	301.073	0.5364	M+H	C16H12O6	66.5	-	-	-	-	-	-	-	-	-	-	66.5	-	-	-	1.709	1.7041	0.8405	0.01003	0.1114	2.5303	2.5652	2.7288	3.2787	3.0353	2.9955
pos_8794	L-Lysine	metab_8777	yes	down	C00047	pos	10098-89-2;56-87-1	147.113	0.5364	M+H	C6H14N2O2	40.3	-	HMDB0301757;PW_C000118;HMDB0000182	Peptides	Amino acids	map01100;map00310;map01110;map00300;map01210;map00780;map02010;map01230;map00970;map00960	Metabolism;Metabolism;Metabolism;Metabolism;Metabolism;Metabolism;Environmental Information Processing;Metabolism;Genetic Information Processing;Metabolism	Global and overview maps;Amino acid metabolism;Global and overview maps;Amino acid metabolism;Global and overview maps;Metabolism of cofactors and vitamins;Membrane transport;Global and overview maps;Translation;Biosynthesis of other secondary metabolites	Organic acids and derivatives	Carboxylic acids and derivatives	Amino acids, peptides, and analogues	40.3	-	Metabolic pathways;Lysine degradation;Biosynthesis of secondary metabolites;Lysine biosynthesis;2-Oxocarboxylic acid metabolism;Biotin metabolism;ABC transporters;Biosynthesis of amino acids;Aminoacyl-tRNA biosynthesis;Tropane, piperidine and pyridine alkaloid biosynthesis	Metabolic pathways;Lysine degradation;Biosynthesis of secondary metabolites;Lysine biosynthesis;2-Oxocarboxylic acid metabolism;Biotin metabolism;ABC transporters;Biosynthesis of amino acids;Aminoacyl-tRNA biosynthesis;Tropane, piperidine and pyridine alkaloid biosynthesis	1.4856	1.4796	0.9184	0.0001907	0.02199	3.9054	3.9592	3.8801	4.2789	4.2387	4.2716
pos_6876	11beta-hydroxyandrost-4-ene-3,17-dione	metab_8990	yes	up	C05284	pos	382-44-5	303.195	3.61055	M+H	C19H26O3	42.4	-	LMST02020066;HMDB0006773	-	-	-	-	-	Organoheterocyclic compounds	Oxazinanes	Morpholines	42.4	-	-	-	1.1791	1.177	1.0489	0.002049	0.05831	4.8651	4.8252	4.8474	4.6788	4.59	4.5901
neg_5	9,10,13-TriHOME	metab_9010	yes	down	C14835	neg	29907-57-1	329.233	5.3095	M-H, M+Cl, 2M-H, M+Na-2H	C18H34O5	-	62.7	HMDB0004710	-	-	map00591	Metabolism	Lipid metabolism	Lipids and lipid-like molecules	Fatty Acyls	Fatty acids and conjugates	-	62.7	Linoleic acid metabolism	Linoleic acid metabolism	1.6784	1.6688	0.9214	0.002239	0.04281	6.0759	6.0841	6.1359	6.5565	6.7635	6.5375
neg_11	Glucodistylin	metab_9016	yes	up	-	neg	27297-45-6	465.104	2.06765	M-H, 2M-H, M+Cl, M-H2O-H	C21H22O12	-	66.3	HMDB0041597	-	-	-	-	-	Phenylpropanoids and polyketides	Flavonoids	Flavonoid glycosides	-	66.3	-	-	1.4569	1.4481	1.0911	0.04709	0.1529	5.7932	5.4451	5.248	5.0281	5.09	4.9901
neg_26	L-Glutamine	metab_9031	yes	down	C00064	neg	5959-95-5;56-85-9	145.061	0.602	M-H, M+FA-H, M-H2O-H	C5H10N2O3	55.6	-	HMDB0000641;HMDB0003423;PW_C000500	Peptides	Amino acids	map01100;map00630;map00220;map00230;map01240;map02010;map00910;map01230;map00240;map00250;map00970;map00750	Metabolism;Metabolism;Metabolism;Metabolism;Metabolism;Environmental Information Processing;Metabolism;Metabolism;Metabolism;Metabolism;Genetic Information Processing;Metabolism	Global and overview maps;Carbohydrate metabolism;Amino acid metabolism;Nucleotide metabolism;Global and overview maps;Membrane transport;Energy metabolism;Global and overview maps;Nucleotide metabolism;Amino acid metabolism;Translation;Metabolism of cofactors and vitamins	Organic acids and derivatives	Carboxylic acids and derivatives	Amino acids, peptides, and analogues	55.6	-	Metabolic pathways;Glyoxylate and dicarboxylate metabolism;Arginine biosynthesis;Purine metabolism;Biosynthesis of cofactors;ABC transporters;Nitrogen metabolism;Biosynthesis of amino acids;Pyrimidine metabolism;Alanine, aspartate and glutamate metabolism;Aminoacyl-tRNA biosynthesis;Vitamin B6 metabolism	Metabolic pathways;Glyoxylate and dicarboxylate metabolism;Arginine biosynthesis;Purine metabolism;Biosynthesis of cofactors;ABC transporters;Nitrogen metabolism;Biosynthesis of amino acids;Pyrimidine metabolism;Alanine, aspartate and glutamate metabolism;Aminoacyl-tRNA biosynthesis;Vitamin B6 metabolism	1.5244	1.5331	0.9048	0.02972	0.1211	4.9418	4.4772	4.607	5.1276	5.0993	5.2743
neg_29	D-glycero-L-galacto-Octulose	metab_9034	yes	down	-	neg	-	239.077	0.622617	M+Cl, M+K-2H, M-H	C8H16O8	-	57.5	HMDB0029954	-	-	-	-	-	Organic oxygen compounds	Organooxygen compounds	Carbohydrates and carbohydrate conjugates	-	57.5	-	-	1.1077	1.1037	0.9579	9.236e-05	0.01446	4.9947	5.0027	5.0265	5.2082	5.2369	5.2398
neg_93	Gingerglycolipid A	metab_9096	yes	up	-	neg	145937-22-0	721.366	7.1724	M-H, M+Cl, M+FA-H	C33H56O14	-	85.1	HMDB0041093;LMGL04010019	-	-	-	-	-	Lipids and lipid-like molecules	Glycerolipids	Glycosylglycerols	-	85.1	-	-	1.7626	1.7505	1.1904	0.0383	0.1365	4.0863	4.2468	3.991	3.8193	3.1203	3.4131
neg_94	(9S,10S)-9,10-dihydroxyoctadecanoate	metab_9097	yes	down	C15988	neg	-	315.254	7.14035	M-H, M+Cl, M+Na-2H	C18H36O4	-	41.7	HMDB0059633	-	-	-	-	-	Lipids and lipid-like molecules	Fatty Acyls	Fatty acids and conjugates	-	41.7	-	-	1.3155	1.3065	0.9439	0.00592	0.06063	5.4148	5.5242	5.6042	5.7986	5.8919	5.8343
neg_100	Chorismate	metab_9103	yes	up	C00251	neg	617-12-9	451.089	2.54185	M+Na-2H, 2M-H, M-H2O-H	C10H10O6	-	58.3	HMDB0012199	-	-	map01100;map01110;map01240;map00130;map00998;map01230;map00790;map00400	Metabolism;Metabolism;Metabolism;Metabolism;Metabolism;Metabolism;Metabolism;Metabolism	Global and overview maps;Global and overview maps;Global and overview maps;Metabolism of cofactors and vitamins;Biosynthesis of other secondary metabolites;Global and overview maps;Metabolism of cofactors and vitamins;Amino acid metabolism	Organic acids and derivatives	Carboxylic acids and derivatives	Dicarboxylic acids and derivatives	-	58.3	Metabolic pathways;Biosynthesis of secondary metabolites;Biosynthesis of cofactors;Ubiquinone and other terpenoid-quinone biosynthesis;Biosynthesis of various secondary metabolites - part 2;Biosynthesis of amino acids;Folate biosynthesis;Phenylalanine, tyrosine and tryptophan biosynthesis	Metabolic pathways;Biosynthesis of secondary metabolites;Biosynthesis of cofactors;Ubiquinone and other terpenoid-quinone biosynthesis;Biosynthesis of various secondary metabolites - part 2;Biosynthesis of amino acids;Folate biosynthesis;Phenylalanine, tyrosine and tryptophan biosynthesis	1.3763	1.3711	1.1397	0.01191	0.08008	3.1685	3.0021	2.9088	2.5865	2.7162	2.6638
neg_101	L-glycyl-L-hydroxyproline	metab_9104	yes	down	-	neg	-	223.045	0.64105	M-H, M+FA-H, M+Cl	C7H12N2O4	-	61	-	-	-	-	-	-	-	-	-	-	61	-	-	1.5015	1.5067	0.9005	0.0142	0.08575	4.2843	4.0403	3.9756	4.6611	4.4829	4.5138
neg_113	(+/-)-Taxifolin	metab_9116	yes	up	-	neg	149418-37-1	303.051	3.05855	M-H, M+Na-2H, M-H2O-H	C15H12O7	73.7	-	HMDB0040894	-	-	-	-	-	Phenylpropanoids and polyketides	Stilbenes	Not Available	73.7	-	-	-	1.3667	1.363	1.073	0.003642	0.0516	5.2284	5.1312	5.1158	4.7166	4.8479	4.8575
neg_120	Cinncassiol D4 2-glucoside	metab_9122	yes	up	-	neg	-	559.277	3.44482	M-H, M+Cl, M+FA-H	C26H42O10	-	47.4	HMDB0035065	-	-	-	-	-	Lipids and lipid-like molecules	Prenol lipids	Terpene glycosides	-	47.4	-	-	1.3728	1.3586	1.0816	0.01929	0.09758	5.1368	4.8651	4.9178	4.6489	4.4912	4.655
neg_138	Prostaglandin E2	metab_9140	yes	down	C00584	neg	363-24-6	397.221	5.3095	M+Cl, M+FA-H, 2M+FA-H	C20H32O5	-	59.1	PW_C000949;LMFA03010003;HMDB0001220	Lipids	Eicosanoids	map01100;map00590	Metabolism;Metabolism	Global and overview maps;Lipid metabolism	Lipids and lipid-like molecules	Fatty Acyls	Eicosanoids	-	59.1	Metabolic pathways;Arachidonic acid metabolism	Metabolic pathways;Arachidonic acid metabolism	1.1463	1.1399	0.9534	0.0122	0.08148	5.2532	5.2163	5.3083	5.4888	5.6181	5.4417
neg_224	L-Histidine	metab_9226	yes	down	C00135	neg	71-00-1	154.061	0.5798	M-H2O-H, M-H	C6H9N3O2	91.6	-	PW_C000116;HMDB0000177	Peptides	Amino acids	map01100;map01110;map00340;map02010;map01230;map00970;map00410	Metabolism;Metabolism;Metabolism;Environmental Information Processing;Metabolism;Genetic Information Processing;Metabolism	Global and overview maps;Global and overview maps;Amino acid metabolism;Membrane transport;Global and overview maps;Translation;Metabolism of other amino acids	Organic acids and derivatives	Carboxylic acids and derivatives	Amino acids, peptides, and analogues	91.6	-	Metabolic pathways;Biosynthesis of secondary metabolites;Histidine metabolism;ABC transporters;Biosynthesis of amino acids;Aminoacyl-tRNA biosynthesis;beta-Alanine metabolism	Metabolic pathways;Biosynthesis of secondary metabolites;Histidine metabolism;ABC transporters;Biosynthesis of amino acids;Aminoacyl-tRNA biosynthesis;beta-Alanine metabolism	1.5715	1.5649	0.9012	0.005482	0.05939	4.136	4.3693	4.3046	4.7555	4.6437	4.8152
neg_288	4-Pyridoxic acid	metab_9290	yes	down	C00847	neg	82-82-6	182.045	1.59372	M-H, 2M+FA-H	C8H9NO4	81.1	-	HMDB0000017;PW_C000011	-	-	map01100;map00750	Metabolism;Metabolism	Global and overview maps;Metabolism of cofactors and vitamins	Organoheterocyclic compounds	Pyridines and derivatives	Pyridinecarboxylic acids and derivatives	81.1	-	Metabolic pathways;Vitamin B6 metabolism	Metabolic pathways;Vitamin B6 metabolism	1.079	1.0762	0.9559	1.596e-05	0.007223	4.5158	4.4998	4.5072	4.7205	4.726	4.7026
neg_340	2-Hydroxybenzaldehyde O-[xylosyl-(1->6)-glucoside]	metab_9342	yes	down	-	neg	14907-56-3	461.13	1.79778	M+Na-2H, M+FA-H	C18H24O11	-	46	HMDB0034157	-	-	-	-	-	Organic oxygen compounds	Organooxygen compounds	Carbohydrates and carbohydrate conjugates	-	46	-	-	1.0873	1.0801	0.9479	0.0262	0.1144	4.446	4.3752	4.3853	4.5317	4.7629	4.6388
neg_350	Nonate	metab_9352	yes	down	-	neg	-	233.103	1.86652	M-H2O-H, M+FA-H	C9H16O4	-	32	HMDB0011717	-	-	-	-	-	Lipids and lipid-like molecules	Fatty Acyls	Fatty acids and conjugates	-	32	-	-	1.037	1.0354	0.9515	0.005769	0.05988	4.0877	4.0748	3.9679	4.2514	4.2537	4.2411
neg_377	1-(dimethylamino)-2-methyl-3,4-diphenylbutane-1,3-diol	metab_9379	yes	down	-	neg	-	344.183	1.95627	M+Na-2H, M+FA-H	C19H25NO2	-	34.2	-	-	-	-	-	-	-	-	-	-	34.2	-	-	1.7599	1.751	0.7535	0.0009628	0.03199	1.7461	1.7309	1.7143	2.1983	2.4172	2.2714
neg_391	Monotropein	metab_9393	yes	up	C09788	neg	5945-50-6	389.109	2.023	M-H, M+Cl	C16H22O11	-	49.9	HMDB0035608;LMPR0102070012	-	-	-	-	-	Lipids and lipid-like molecules	Prenol lipids	Terpene glycosides	-	49.9	-	-	1.1208	1.1082	1.0653	0.03941	0.1391	4.4903	4.2115	4.261	4.0929	4.0348	4.0408
neg_411	3-Hydroxysuberic acid	metab_9413	yes	down	-	neg	73141-47-6	189.076	2.134	M-H, 2M+Hac-H	C8H14O5	-	32.6	HMDB0000325	-	-	-	-	-	Organic acids and derivatives	Hydroxy acids and derivatives	Medium-chain hydroxy acids and derivatives	-	32.6	-	-	1.3713	1.3735	0.9171	0.004714	0.05773	4.0407	3.9692	3.9055	4.4036	4.2361	4.3534
neg_428	3-O-Feruloylquinic acid	metab_9430	yes	up	C02572	neg	62929-69-5	367.103	2.11192	M-H, M+Na-2H	C17H20O9	-	64.9	HMDB0030669	-	-	-	-	-	Organic oxygen compounds	Organooxygen compounds	Alcohols and polyols	-	64.9	-	-	1.0286	1.0304	1.0477	0.02548	0.1129	4.8802	4.827	4.7982	4.5393	4.7304	4.5768
neg_476	Austdiol	metab_9478	yes	down	-	neg	53043-28-0	235.061	2.496	M-H, M+Na-2H	C12H12O5	-	72.2	HMDB0030858	-	-	-	-	-	Organoheterocyclic compounds	Azaphilones	Not Available	-	72.2	-	-	1.6735	1.6614	0.8548	0.0287	0.1196	3.262	3.3448	3.5447	3.6628	4.1494	4.0653
neg_477	Glutamyltryptophan	metab_9479	yes	down	-	neg	38101-59-6	332.125	2.496	M-H2O-H, M-H	C16H19N3O5	-	54.8	HMDB0028830	-	-	-	-	-	Organic acids and derivatives	Carboxylic acids and derivatives	Amino acids, peptides, and analogues	-	54.8	-	-	1.3992	1.4013	0.89	0.04795	0.1544	3.3823	3.4811	3.65	4.1888	3.7424	3.8792
neg_523	2-O-Benzoyl-D-glucose	metab_9525	yes	up	-	neg	63029-01-6	329.088	2.74795	M+Na-2H, M+FA-H	C13H16O7	-	77.4	HMDB0034618	-	-	-	-	-	Organic oxygen compounds	Organooxygen compounds	Carbohydrates and carbohydrate conjugates	-	77.4	-	-	2.0319	2.0287	1.3309	0.02829	0.1185	3.7238	3.345	3.308	2.1623	2.7931	2.8413
neg_576	Gamma-delta-Dioxovaleric acid	metab_9578	yes	up	C02800	neg	-	151.003	3.0362	M+Na-2H, 2M+FA-H	C5H6O4	-	55.9	HMDB0013233	-	-	map00860	Metabolism	Metabolism of cofactors and vitamins	Organic acids and derivatives	Keto acids and derivatives	Gamma-keto acids and derivatives	-	55.9	Porphyrin and chlorophyll metabolism	Porphyrin and chlorophyll metabolism	1.8925	1.8883	1.2431	0.0002761	0.01955	3.3766	3.3036	3.276	2.6481	2.7564	2.6053
neg_671	Trilobatin	metab_9673	yes	up	-	neg	4192-90-9	435.13	3.28508	M-H2O-H, M-H	C21H24O10	-	80.3	HMDB0037505;LMPK12120518	-	-	-	-	-	Phenylpropanoids and polyketides	Flavonoids	Flavonoid glycosides	-	80.3	-	-	1.9242	1.9062	1.1535	0.01469	0.08691	5.7337	5.2809	5.3333	4.7803	4.5233	4.8673
neg_723	2-(3,5-dihydroxyphenyl)-3,5,6,7-tetrahydroxy-3,4-dihydro-2H-1-benzopyran-4-one	metab_9725	yes	up	-	neg	-	319.046	2.77092	M-H, M+Na-2H	C15H12O8	-	78.8	-	-	-	-	-	-	-	-	-	-	78.8	-	-	2.3579	2.3459	1.5373	0.00223	0.04278	3.2228	2.8194	2.7888	1.8253	1.9352	1.9849
neg_770	6-(4-ethyl-3-hydroxyphenoxy)-3,4,5-trihydroxyoxane-2-carboxylic acid	metab_9772	yes	down	-	neg	-	295.082	2.496	M-H2O-H, M-H	C14H18O8	-	84.4	-	-	-	-	-	-	-	-	-	-	84.4	-	-	1.9033	1.895	0.8344	0.01304	0.08364	3.5066	3.4502	3.7777	4.0266	4.4553	4.3815
neg_771	Gentisein	metab_9773	yes	up	C10065	neg	529-49-7	289.036	2.47328	M+FA-H, 2M+FA-H	C13H8O5	-	64.1	HMDB0029463	-	-	-	-	-	Organoheterocyclic compounds	Benzopyrans	1-benzopyrans	-	64.1	-	-	2.176	2.1679	1.5515	0.001151	0.03368	2.591	2.4853	2.2421	1.6036	1.5604	1.5526
neg_808	Xi-7-Hydroxyhexadecanedioic acid	metab_9809	yes	down	-	neg	-	301.202	5.26503	M-H, M+Na-2H	C16H30O5	-	56	HMDB0037830	-	-	-	-	-	Lipids and lipid-like molecules	Fatty Acyls	Fatty acids and conjugates	-	56	-	-	1.2582	1.261	0.9195	0.03414	0.1291	3.8713	3.8019	3.91	4.39	4.1653	4.0413
neg_874	3,5,6,7-tetrahydroxy-2-(4-hydroxy-3-methoxyphenyl)-8aH-chromen-8a-yl	metab_9875	yes	up	-	neg	-	299.056	2.2909	M-H2O-H, M-H	C16H14O7	-	60.9	-	-	-	-	-	-	-	-	-	-	60.9	-	-	2.1548	2.1456	1.3434	0.002832	0.04643	3.6213	3.2668	3.2532	2.4522	2.6246	2.4712
neg_889	LysoPC(14:0/0:0)	metab_9890	yes	up	C04230	neg	20559-16-4	512.299	7.05497	M+Cl, M+FA-H	C22H46NO7P	-	88.9	HMDB0010379;PW_C006388	Lipids	Phospholipids	map00564	Metabolism	Lipid metabolism	Lipids and lipid-like molecules	Glycerophospholipids	Glycerophosphocholines	-	88.9	Glycerophospholipid metabolism	Glycerophospholipid metabolism	1.1828	1.1806	1.051	0.01458	0.08688	5.6354	5.7119	5.847	5.487	5.4003	5.4728
neg_924	LysoPA(i-14:0/0:0)	metab_9925	yes	up	-	neg	-	363.194	7.53683	M-H2O-H, M-H	C17H35O7P	-	35.6	HMDB0114765	-	-	-	-	-	Lipids and lipid-like molecules	Glycerophospholipids	Glycerophosphates	-	35.6	-	-	1.2254	1.2147	1.0692	0.0293	0.1204	4.9112	4.6451	4.7737	4.5448	4.4905	4.3675
neg_1029	Galanal A	metab_10030	yes	down	-	neg	104086-74-0	363.215	7.33355	M+FA-H, 2M+FA-H	C20H30O3	-	39.1	HMDB0035311	-	-	-	-	-	Organic oxygen compounds	Organooxygen compounds	Alcohols and polyols	-	39.1	-	-	1.1094	1.0989	0.9542	0.01692	0.09274	5.0305	5.0977	5.0551	5.2232	5.4178	5.2718
neg_1124	Erinapyrone A	metab_10125	yes	up	-	neg	146064-66-6	123.044	1.68385	M-H2O-H, M-H	C7H10O3	-	50.8	HMDB0041426	-	-	-	-	-	Organoheterocyclic compounds	Pyrans	Pyranones and derivatives	-	50.8	-	-	1.1043	1.1052	1.0619	0.001878	0.04042	3.8936	3.9226	3.8623	3.627	3.7147	3.6552
neg_1299	N'-Hydroxyneosaxitoxin	metab_10300	yes	up	-	neg	153856-78-1	330.12	1.39423	M-H2O-H, M-H	C10H17N7O6	-	32.6	HMDB0033665	-	-	-	-	-	Phenylpropanoids and polyketides	Saxitoxins, gonyautoxins, and derivatives	Not Available	-	32.6	-	-	1.127	1.1234	1.0592	0.006409	0.06209	4.3723	4.3844	4.2908	4.069	4.0718	4.1783
neg_1548	N-Methyl-1-deoxynojirimycin	metab_10549	yes	up	-	neg	69567-10-8	214.048	0.602	M+K-2H	C7H15NO4	-	77.9	HMDB0035360	-	-	-	-	-	Organoheterocyclic compounds	Piperidines	Not Available	-	77.9	-	-	1.7227	1.7176	1.118	0.0003023	0.01955	5.0997	5.1455	5.0201	4.5483	4.5047	4.6
neg_1619	Ribonolactone	metab_10620	yes	down	C02674	neg	5336-08-03	129.018	0.778817	M-H2O-H	C5H8O5	-	53.6	HMDB0001900	-	-	-	-	-	Organic oxygen compounds	Organooxygen compounds	Carbohydrates and carbohydrate conjugates	-	53.6	-	-	1.1213	1.128	0.9441	0.03125	0.1239	4.637	4.4686	4.4632	4.9075	4.7114	4.7547
neg_1835	Guanosine-5'-monophosphate	metab_10836	yes	down	C00144	neg	85-32-5	362.051	1.61653	M-H	C10H14N5O8P	92.3	-	HMDB0001397	Nucleic acids	Nucleotides	map01100;map00230	Metabolism;Metabolism	Global and overview maps;Nucleotide metabolism	Nucleosides, nucleotides, and analogues	Purine nucleotides	Purine ribonucleotides	92.3	-	Metabolic pathways;Purine metabolism	Metabolic pathways;Purine metabolism	1.0674	1.0677	0.9079	0.03015	0.122	2.3952	2.4286	2.2184	2.6165	2.6168	2.523
neg_1871	N-Acetylcystathionine	metab_10872	yes	up	-	neg	20619-80-1	527.152	1.66145	2M-H	C9H16N2O5S	-	37.6	HMDB0002381	-	-	-	-	-	Organic acids and derivatives	Carboxylic acids and derivatives	Amino acids, peptides, and analogues	-	37.6	-	-	1.5269	1.5344	1.2048	0.01554	0.08967	2.5853	2.8814	2.829	2.2761	2.428	2.18
neg_1906	Glutamylmethionine	metab_10907	yes	down	-	neg	4423-22-7	277.086	1.72938	M-H	C10H18N2O5S	-	67.4	HMDB0028825	-	-	-	-	-	Organic acids and derivatives	Carboxylic acids and derivatives	Amino acids, peptides, and analogues	-	67.4	-	-	1.4792	1.4782	0.8757	0.0004004	0.02123	2.8687	2.7799	2.7881	3.2543	3.2048	3.175
neg_2076	Asparaginyl-Phenylalanine	metab_11076	yes	down	-	neg	-	278.115	1.97887	M-H	C13H17N3O4	-	66.9	HMDB0028738	-	-	-	-	-	Organic acids and derivatives	Carboxylic acids and derivatives	Amino acids, peptides, and analogues	-	66.9	-	-	1.6532	1.6434	0.7943	0.03634	0.1326	2.229	2.2283	2.2161	2.7571	3.1418	2.5021
neg_2113	Cinnamtannin II	metab_11113	yes	up	C17626	neg	86631-39-2	720.159	2.023	M-2H	C75H62O30	-	54.4	HMDB0037659	-	-	-	-	-	Phenylpropanoids and polyketides	Flavonoids	Biflavonoids and polyflavonoids	-	54.4	-	-	1.2937	1.2856	1.063	0.01407	0.08542	5.6934	5.4666	5.4998	5.1589	5.2332	5.2799
neg_2122	6-Hydroxyluteolin	metab_11122	yes	up	C10072	neg	18003-33-3	301.035	2.06765	M-H	C15H10O7	-	50.5	LMPK12111229;HMDB0036632	-	-	-	-	-	Phenylpropanoids and polyketides	Flavonoids	Flavones	-	50.5	-	-	2.1466	2.1423	1.4328	0.02799	0.1182	3.5807	3.086	2.8293	1.9414	2.5473	2.137
neg_2161	Azelaic acid	metab_11161	yes	down	C08261	neg	123-99-9	233.103	2.1562	M+FA-H	C9H16O4	-	68	HMDB0000784;LMFA01170054	-	-	-	-	-	Lipids and lipid-like molecules	Fatty Acyls	Fatty acids and conjugates	-	68	-	-	1.1557	1.1554	0.9387	0.002436	0.04375	3.8636	3.8427	3.7865	4.1349	4.0695	4.0378
neg_2184	Jasmolone glucoside	metab_11184	yes	up	-	neg	-	387.166	2.20167	M+FA-H	C17H26O7	-	48.4	HMDB0032870	-	-	-	-	-	Organic oxygen compounds	Organooxygen compounds	Carbohydrates and carbohydrate conjugates	-	48.4	-	-	1.6627	1.6485	1.2017	0.02764	0.1173	3.6538	3.2606	3.2004	2.9748	2.7631	2.6808
neg_2293	Alloathyriol	metab_11293	yes	up	-	neg	67370-97-2	319.046	2.45027	M+FA-H	C14H10O6	-	77.6	HMDB0038715	-	-	-	-	-	Organoheterocyclic compounds	Benzopyrans	1-benzopyrans	-	77.6	-	-	2.1533	2.1514	1.4571	0.00793	0.06685	3.0446	2.8185	2.6883	1.9584	2.2134	1.6974
neg_2320	(-)-Shikimic acid	metab_11320	yes	up	C00493	neg	138-59-0	173.045	2.496	M-H	C7H10O5	65.7	-	HMDB0003070	-	-	map01100;map00400;map01110;map01230;map01240	Metabolism;Metabolism;Metabolism;Metabolism;Metabolism	Global and overview maps;Amino acid metabolism;Global and overview maps;Global and overview maps;Global and overview maps	Organic oxygen compounds	Organooxygen compounds	Alcohols and polyols	65.7	-	Metabolic pathways;Phenylalanine, tyrosine and tryptophan biosynthesis;Biosynthesis of secondary metabolites;Biosynthesis of amino acids;Biosynthesis of cofactors	Metabolic pathways;Phenylalanine, tyrosine and tryptophan biosynthesis;Biosynthesis of secondary metabolites;Biosynthesis of amino acids;Biosynthesis of cofactors	1.0312	1.0305	1.0714	0.02244	0.1053	3.3187	3.2214	3.2704	2.9489	3.1266	3.0812
neg_2386	7-hydroxy-1-oxo-1H-isochromene-3-carboxylic acid	metab_11386	yes	up	-	neg	-	205.014	2.61043	M-H	C10H6O5	-	61.9	-	-	-	-	-	-	-	-	-	-	61.9	-	-	1.3889	1.3847	1.1407	0.006223	0.06163	3.0589	2.8996	2.9942	2.5881	2.7175	2.5424
neg_2508	7-Hydroxy-2-methyl-4-oxo-4H-1-benzopyran-5-carboxylic acid	metab_11508	yes	up	-	neg	-	219.029	2.83958	M-H	C11H8O5	-	73.5	HMDB0036346	-	-	-	-	-	Organoheterocyclic compounds	Benzopyrans	1-benzopyrans	-	73.5	-	-	1.7423	1.7442	1.2307	0.02826	0.1185	3.5156	3.3341	3.3291	2.4411	3.0605	2.7696
neg_2591	5-Hydroxyconiferyl alcohol	metab_11591	yes	down	C12205	neg	1782-47-4	391.14	2.9984	2M-H	C10H12O4	-	53.9	HMDB0060398	-	-	map00940;map01110	Metabolism;Metabolism	Biosynthesis of other secondary metabolites;Global and overview maps	Benzenoids	Phenols	Methoxyphenols	-	53.9	Phenylpropanoid biosynthesis;Biosynthesis of secondary metabolites	Phenylpropanoid biosynthesis;Biosynthesis of secondary metabolites	2.0669	2.0507	0.7176	0.009908	0.07253	1.8734	2.2129	2.1801	2.6284	3.0366	3.0678
neg_2654	Quercetin-3-glucoside	metab_11654	yes	up	C05623	neg	482-35-9	463.089	3.1481	M-H	C21H20O12	97.1	-	HMDB0037362;HMDB0247252	-	-	map01100;map01110;map00944	Metabolism;Metabolism;Metabolism	Global and overview maps;Global and overview maps;Biosynthesis of other secondary metabolites	Phenylpropanoids and polyketides	Flavonoids	Flavonoid glycosides	97.1	-	Metabolic pathways;Biosynthesis of secondary metabolites;Flavone and flavonol biosynthesis	Metabolic pathways;Biosynthesis of secondary metabolites;Flavone and flavonol biosynthesis	1.3259	1.3155	1.1121	0.02672	0.1156	3.7647	3.4267	3.5194	3.2034	3.2653	3.1621
neg_2707	Matairesinol	metab_11707	yes	down	C10682	neg	580-72-3	357.134	3.26223	M-H	C20H22O6	36	-	HMDB0035698	-	-	map01100;map01110;map00998	Metabolism;Metabolism;Metabolism	Global and overview maps;Global and overview maps;Biosynthesis of other secondary metabolites	Lignans, neolignans and related compounds	Furanoid lignans	Tetrahydrofuran lignans	36	-	Metabolic pathways;Biosynthesis of secondary metabolites;Biosynthesis of various secondary metabolites - part 2	Metabolic pathways;Biosynthesis of secondary metabolites;Biosynthesis of various secondary metabolites - part 2	1.5092	1.5036	0.8329	0.04895	0.1562	2.3512	2.3384	2.7744	3.1048	3.0818	2.7748
neg_2719	5,7-Dihydroxy-4'-methoxy-8-methylisoflavanone	metab_11719	yes	up	-	neg	163021-16-7	345.098	3.28508	M+FA-H	C17H16O5	-	43.4	HMDB0041322	-	-	-	-	-	Phenylpropanoids and polyketides	Isoflavonoids	O-methylated isoflavonoids	-	43.4	-	-	1.718	1.7055	1.1904	0.02061	0.1001	4.0129	3.5707	3.554	3.0227	3.1222	3.2119
neg_2821	6-(1-benzofuran-4-yloxy)-3,4,5-trihydroxyoxane-2-carboxylic acid	metab_11821	yes	up	-	neg	-	331.046	3.51303	M+Na-2H	C14H14O8	-	82	-	-	-	-	-	-	-	-	-	-	82	-	-	2.3125	2.303	1.4049	0.00166	0.03828	3.5088	3.4656	3.2876	2.3659	2.285	2.6538
neg_2864	3-(6-hydroxy-7-methoxy-2H-1,3-benzodioxol-5-yl)prop-2-enoic acid	metab_11864	yes	up	-	neg	-	259.025	3.60422	M+Na-2H	C11H10O6	-	41.1	-	-	-	-	-	-	-	-	-	-	41.1	-	-	1.8998	1.8916	1.1745	0.007016	0.06384	4.8843	4.6076	4.4437	3.8748	4.0202	3.9706
neg_2872	3-Dehydroquinate	metab_11872	yes	up	C00944	neg	10534-44-8	211.024	3.62702	M+Na-2H	C7H10O6	-	69.6	HMDB0012710	-	-	map01100;map00400;map01110;map01230	Metabolism;Metabolism;Metabolism;Metabolism	Global and overview maps;Amino acid metabolism;Global and overview maps;Global and overview maps	Organic acids and derivatives	Hydroxy acids and derivatives	Alpha hydroxy acids and derivatives	-	69.6	Metabolic pathways;Phenylalanine, tyrosine and tryptophan biosynthesis;Biosynthesis of secondary metabolites;Biosynthesis of amino acids	Metabolic pathways;Phenylalanine, tyrosine and tryptophan biosynthesis;Biosynthesis of secondary metabolites;Biosynthesis of amino acids	1.4	1.3953	1.1094	0.001861	0.04036	3.7495	3.6852	3.6044	3.2668	3.3287	3.356
neg_2895	Cortolone-3-glucuronide	metab_11895	yes	up	-	neg	56162-46-0	541.266	3.67257	M-H	C27H42O11	-	62.4	HMDB0010320	-	-	-	-	-	Lipids and lipid-like molecules	Steroids and steroid derivatives	Steroidal glycosides	-	62.4	-	-	1.113	1.1005	1.0584	0.04233	0.1449	4.9251	4.7157	4.6639	4.5331	4.4258	4.5567
neg_2900	METHYL 7-DESHYDROXYPYROGALLIN-4-CARBOXYLATE	metab_11900	yes	up	-	neg	-	261.04	3.69532	M-H	C13H10O6	53.2	-	-	-	-	-	-	-	-	-	-	53.2	-	-	-	1.8659	1.8504	1.4398	0.01033	0.07425	2.4389	1.9414	2.2182	1.5901	1.4949	1.4988
neg_2978	Epigallocatechin gallate	metab_11978	yes	up	C09731	neg	989-51-5	439.067	3.90032	M-H2O-H	C22H18O11	-	57.9	HMDB0003153	-	-	-	-	-	Phenylpropanoids and polyketides	Flavonoids	Flavans	-	57.9	-	-	1.9542	1.949	1.3974	0.04938	0.1566	3.3715	2.7841	2.7067	1.7042	2.4367	2.2021
neg_3066	Jasmolone	metab_12066	yes	up	-	neg	54383-66-3	225.113	4.17323	M+FA-H	C11H16O2	-	57.5	HMDB0030039	-	-	-	-	-	Organic oxygen compounds	Organooxygen compounds	Alcohols and polyols	-	57.5	-	-	1.272	1.2642	1.088	0.008052	0.06706	3.84	3.7326	3.9272	3.581	3.4913	3.4974
neg_3067	HIERACIN	metab_12067	yes	up	-	neg	-	301.035	4.17323	M-H	C15H10O7	62.5	-	-	-	-	-	-	-	-	-	-	62.5	-	-	-	2.7497	2.738	1.4132	0.000135	0.01632	4.8255	4.5299	4.5971	3.249	3.2754	3.3493
neg_3245	Tetranor 12-HETE	metab_12245	yes	up	-	neg	-	287.165	4.94718	M+Na-2H	C16H26O3	-	57.3	HMDB0060055	-	-	-	-	-	Lipids and lipid-like molecules	Fatty Acyls	Fatty acids and conjugates	-	57.3	-	-	2.5311	2.5163	1.6917	0.005085	0.0588	2.9855	2.8981	2.9733	2.175	1.5283	1.5322
neg_3511	Jasmonic acid	metab_12511	yes	up	C08491	neg	59366-47-1;6894-38-8	209.118	6.62337	M-H	C12H18O3	-	34.9	LMFA02020001;HMDB0032797	-	-	map01100;map00592;map01110;map04075	Metabolism;Metabolism;Metabolism;Environmental Information Processing	Global and overview maps;Lipid metabolism;Global and overview maps;Signal transduction	Lipids and lipid-like molecules	Fatty Acyls	Lineolic acids and derivatives	-	34.9	Metabolic pathways;alpha-Linolenic acid metabolism;Biosynthesis of secondary metabolites;Plant hormone signal transduction	Metabolic pathways;alpha-Linolenic acid metabolism;Biosynthesis of secondary metabolites;Plant hormone signal transduction	1.569	1.5624	1.1205	0.0005288	0.02455	4.1401	4.1686	4.1655	3.7933	3.6476	3.693
neg_3512	12-OPDA	metab_12512	yes	up	C01226	neg	85551-10-6	291.197	6.62337	M-H	C18H28O3	59	-	HMDB0301804	-	-	map01100;map00592;map01110	Metabolism;Metabolism;Metabolism	Global and overview maps;Lipid metabolism;Global and overview maps	Lipids and lipid-like molecules	Fatty Acyls	Eicosanoids	59	-	Metabolic pathways;alpha-Linolenic acid metabolism;Biosynthesis of secondary metabolites	Metabolic pathways;alpha-Linolenic acid metabolism;Biosynthesis of secondary metabolites	1.6486	1.6415	1.1371	0.001216	0.03397	4.0994	4.154	4.1375	3.7422	3.5418	3.6126
neg_3584	9-OxoOTrE	metab_12584	yes	down	-	neg	-	291.197	7.00158	M-H	C18H28O3	57	-	-	-	-	-	-	-	-	-	-	57	-	-	-	1.615	1.6054	0.8954	0.005325	0.05939	4.2425	4.2236	4.1665	4.5394	4.8335	4.7373
neg_3677	Eriojaposide B	metab_12676	yes	up	C17889	neg	351412-97-0	561.256	7.35287	M+FA-H	C25H40O11	-	69.9	HMDB0038029	-	-	-	-	-	Lipids and lipid-like molecules	Fatty Acyls	Fatty acyl glycosides	-	69.9	-	-	1.7687	1.7584	1.1757	0.002202	0.04245	3.9131	3.7584	3.9282	3.4103	3.2526	3.2039
neg_3773	1-Oleoylglycerophosphoinositol	metab_12772	yes	down	-	neg	1114770-15-8	597.306	7.83945	M-H	C27H51O12P	-	53.3	HMDB0061693	-	-	-	-	-	Lipids and lipid-like molecules	Glycerophospholipids	Glycerophosphoinositols	-	53.3	-	-	1.5305	1.5241	0.9183	0.0002992	0.01955	4.7691	4.7908	4.7024	5.1316	5.2141	5.1865
neg_3792	CPA(18:2(9Z,12Z)/0:0)	metab_12791	yes	up	-	neg	-	415.226	7.89978	M-H	C21H37O6P	-	65.2	HMDB0007007	-	-	-	-	-	Lipids and lipid-like molecules	Fatty Acyls	Lineolic acids and derivatives	-	65.2	-	-	1.3969	1.383	1.0806	0.02386	0.1093	5.3991	5.1372	5.3108	5.0467	4.8292	4.7882
neg_3876	CPA(16:0/0:0)	metab_12875	yes	up	-	neg	-	391.226	8.34532	M-H	C19H37O6P	-	90.5	HMDB0007003	-	-	-	-	-	Lipids and lipid-like molecules	Glycerophospholipids	Glycerophosphates	-	90.5	-	-	1.1595	1.1549	1.0507	0.02155	0.1027	5.754	5.5991	5.5686	5.4066	5.4246	5.2753
neg_4016	12-hydroxyheptadecanoic acid	metab_13015	yes	up	-	neg	-	285.243	8.77915	M-H	C17H34O3	-	49.9	HMDB0061663	-	-	-	-	-	Lipids and lipid-like molecules	Fatty Acyls	Fatty acids and conjugates	-	49.9	-	-	1.2666	1.2621	1.0849	0.02539	0.1128	4.2026	4.3142	4.0971	4.0053	3.7617	3.8611
neg_4041	MGDG(13:0/18:2)	metab_13040	yes	down	-	neg	-	711.506	8.88788	M-H	C40H72O10	55.5	-	-	-	-	-	-	-	-	-	-	55.5	-	-	-	1.6803	1.6788	0.887	0.003308	0.04972	4.326	4.0997	4.0751	4.67	4.7555	4.6698
neg_4259	GPEtn(18:1/18:2)	metab_13258	yes	up	-	neg	1188-56-3;205648-90-4	740.522	10.0249	M-H	C41H76NO8P	56	-	HMDB0009027;HMDB0009060;HMDB0011376	-	-	-	-	-	Lipids and lipid-like molecules	Glycerophospholipids	Glycerophosphoethanolamines	56	-	-	-	1.5028	1.5023	1.0842	0.0004788	0.02305	5.3013	5.3336	5.3149	4.8859	4.9781	4.8488
neg_4282	GPA(18:2/18:2)	metab_13281	yes	down	-	neg	-	695.466	10.1283	M-H	C39H69O8P	79.4	-	-	-	-	-	-	-	-	-	-	79.4	-	-	-	2.4965	2.4901	0.7953	0.0001614	0.01767	4.4267	4.4668	4.2219	5.4936	5.4465	5.5521
neg_4352	GPA(17:0/18:2)	metab_13351	yes	down	-	neg	-	685.482	11.1982	M-H	C38H71O8P	50	-	-	-	-	-	-	-	-	-	-	50	-	-	-	1.4572	1.4537	0.9209	0.04537	0.1501	5.2412	5.329	5.4314	5.5258	5.8056	6.0433
neg_5088	PI(16:0/18:2(9Z,12Z))	metab_14087	yes	up	-	neg	219584-66-4	833.519	10.7528	M-H	C43H79O13P	-	39.7	LMGP06010959;HMDB0009784	-	-	-	-	-	Lipids and lipid-like molecules	Glycerophospholipids	Glycerophosphoinositols	-	39.7	-	-	1.1181	1.1193	1.0411	0.0143	0.08599	6.3566	6.3854	6.2634	5.9903	6.139	6.1268
neg_5122	PE-NMe(18:0/18:2(9Z,12Z))	metab_14121	yes	up	C01241	neg	-	802.561	10.307	M+FA-H	C42H80NO8P	-	44.9	HMDB0113089;PW_C059212	-	-	-	-	-	Lipids and lipid-like molecules	Glycerophospholipids	Glycerophosphoethanolamines	-	44.9	-	-	1.7729	1.7701	1.1098	6.049e-05	0.01141	5.7177	5.7766	5.673	5.1407	5.1784	5.1501
neg_5124	GPA(18:1/18:2)	metab_14123	yes	down	-	neg	-	697.482	10.307	M-H	C39H71O8P	85.2	-	-	-	-	-	-	-	-	-	-	85.2	-	-	-	2.5809	2.5726	0.7791	0.00138	0.03562	4.4708	4.4698	4.0275	5.4655	5.6288	5.5525
neg_5127	PE-NMe(18:1(11Z)/20:2(11Z,14Z))	metab_14126	yes	up	C01241	neg	-	828.576	10.2749	M+FA-H	C44H82NO8P	-	56.4	HMDB0113122;PW_C059245	-	-	-	-	-	Lipids and lipid-like molecules	Glycerophospholipids	Glycerophosphoethanolamines	-	56.4	-	-	1.8276	1.828	1.1151	0.001106	0.03359	5.9695	6.0104	5.9213	5.2646	5.4867	5.3006
neg_5172	1-Palmitoyl-2-linoleoyl PE	metab_14171	yes	up	-	neg	-	714.508	10.0403	M-H	C39H74NO8P	69.6	-	-	-	-	-	-	-	-	-	-	69.6	-	-	-	1.7257	1.7229	1.1123	0.0001821	0.01895	5.2996	5.4116	5.3084	4.8367	4.7914	4.7755
neg_5195	DG(16:0/20:2(11Z,14Z)/0:0)	metab_14194	yes	up	C00165	neg	-	641.511	9.93125	M+Na-2H	C39H72O5	-	43.5	PW_C003160;HMDB0007109	-	-	-	-	-	Lipids and lipid-like molecules	Glycerolipids	Diradylglycerols	-	43.5	-	-	1.7099	1.7135	1.1411	0.004236	0.05497	4.4568	4.5507	4.5075	3.8317	4.1278	3.8854
neg_5201	PE-NMe(18:1(11Z)/20:3(5Z,8Z,11Z))	metab_14200	yes	up	C01241	neg	-	826.561	9.90082	M+FA-H	C44H80NO8P	-	61.6	PW_C059246;HMDB0113123	-	-	-	-	-	Lipids and lipid-like molecules	Glycerophospholipids	Glycerophosphoethanolamines	-	61.6	-	-	1.7668	1.7593	1.1104	0.0008986	0.03124	5.755	5.7663	5.68	5.1692	5.06	5.2621
neg_5598	CPA(18:1(11Z)/0:0)	metab_14597	yes	up	-	neg	-	417.241	8.4601	M-H	C21H39O6P	-	67.3	HMDB0007005	-	-	-	-	-	Lipids and lipid-like molecules	Glycerophospholipids	Glycerophosphates	-	67.3	-	-	1.0566	1.0488	1.0487	0.03548	0.1313	5.1973	4.9806	5.0101	4.8455	4.8734	4.7663
neg_5639	Pravastatin	metab_14638	yes	up	C01844	neg	81093-37-0	459.213	8.34532	M+Cl	C23H36O7	-	46.7	HMDB0256737;LMFA05000695;PW_C002369;HMDB0005022	-	-	-	-	-	Organoheterocyclic compounds	Lactones	Delta valerolactones	-	46.7	-	-	1.0473	1.0468	1.0557	0.04652	0.1519	4.6308	4.5103	4.3871	4.2868	4.3406	4.1862
neg_5769	11(R)-HEDE	metab_14768	yes	down	-	neg	-	323.259	7.88552	M-H	C20H36O3	70.3	-	-	-	-	-	-	-	-	-	-	70.3	-	-	-	1.163	1.1643	0.8934	0.03388	0.1291	2.4865	2.3653	2.3663	2.7672	2.7807	2.5309
neg_5787	LysoPA(0:0/18:2(9Z,12Z))	metab_14786	yes	down	-	neg	-	433.236	7.83945	M-H	C21H39O7P	-	86.2	HMDB0007852	-	-	-	-	-	Lipids and lipid-like molecules	Glycerophospholipids	Glycerophosphates	-	86.2	-	-	2.0541	2.0525	0.8539	0.001244	0.03438	4.6912	4.596	4.3902	5.3944	5.2713	5.3499
neg_5794	1-Palmitoylglycerophosphoinositol	metab_14793	yes	up	-	neg	1425501-12-7	571.289	7.81812	M-H	C25H49O12P	-	51.4	HMDB0061695	-	-	-	-	-	Lipids and lipid-like molecules	Glycerophospholipids	Glycerophosphoinositols	-	51.4	-	-	1.088	1.0817	1.05	0.0116	0.07921	4.8483	4.8147	4.8403	4.7039	4.5746	4.534
neg_5924	9(S)-HOTrE	metab_14923	yes	down	C16326	neg	-	293.212	7.37588	M-H	C18H30O3	51.4	-	HMDB0247705	-	-	map00592	Metabolism	Lipid metabolism	Lipids and lipid-like molecules	Fatty Acyls	Lineolic acids and derivatives	51.4	-	alpha-Linolenic acid metabolism	alpha-Linolenic acid metabolism	1.7569	1.7442	0.8996	0.0137	0.08505	5.4153	5.4519	5.4	5.7446	6.2088	6.1279
neg_5945	9(S)-HODE	metab_14944	yes	down	C14767	neg	73543-67-6	295.228	7.33355	M-H	C18H32O3	79.1	-	HMDB0004670	-	-	map00591	Metabolism	Lipid metabolism	Lipids and lipid-like molecules	Fatty Acyls	Lineolic acids and derivatives	79.1	-	Linoleic acid metabolism	Linoleic acid metabolism	1.0219	1.0121	0.9678	0.01932	0.0976	6.227	6.2751	6.2799	6.4052	6.5725	6.4287
neg_5954	PE(14:0/0:0)	metab_14953	yes	up	-	neg	-	424.247	7.31063	M-H	C19H40NO7P	97.3	-	LMGP02050003	-	-	-	-	-	-	-	-	97.3	-	-	-	1.1467	1.1394	1.0474	0.01564	0.08988	5.7164	5.6831	5.8234	5.5489	5.3871	5.5072
neg_6076	15-Deoxy-d-12,14-PGJ2	metab_15075	yes	down	C14717	neg	87893-55-8	361.2	6.94523	M+FA-H	C20H28O3	-	43.8	HMDB0005079;PW_C002398	-	-	map00590	Metabolism	Lipid metabolism	Lipids and lipid-like molecules	Fatty Acyls	Eicosanoids	-	43.8	Arachidonic acid metabolism	Arachidonic acid metabolism	1.4476	1.4361	0.9112	0.01157	0.0792	4.1713	4.2043	4.1589	4.4223	4.7376	4.5948
neg_6257	9(S)-HpOTrE	metab_15256	yes	up	C16321	neg	111004-08-1	309.207	6.10543	M-H	C18H30O4	76.2	-	-	-	-	map00592;map01110	Metabolism;Metabolism	Lipid metabolism;Global and overview maps	-	-	-	76.2	-	alpha-Linolenic acid metabolism;Biosynthesis of secondary metabolites	alpha-Linolenic acid metabolism;Biosynthesis of secondary metabolites	1.2758	1.2737	1.0597	0.005304	0.05939	5.4667	5.4706	5.5111	5.2423	5.2121	5.0663
neg_6376	KOPARIN 2'-METHYL ETHER	metab_15375	yes	up	-	neg	-	313.072	5.44493	M-H	C17H14O6	66.7	-	-	-	-	-	-	-	-	-	-	66.7	-	-	-	1.283	1.2727	1.1199	0.02781	0.1178	3.1994	3.2133	3.057	2.9332	2.6488	2.874
neg_6402	Traumatin	metab_15401	yes	down	C16309	neg	65410-38-0	233.115	5.3095	M+Na-2H	C12H20O3	-	49.4	HMDB0037326;LMFA01060093	-	-	map00592;map01110	Metabolism;Metabolism	Lipid metabolism;Global and overview maps	Lipids and lipid-like molecules	Fatty Acyls	Fatty acids and conjugates	-	49.4	alpha-Linolenic acid metabolism;Biosynthesis of secondary metabolites	alpha-Linolenic acid metabolism;Biosynthesis of secondary metabolites	1.975	1.9651	0.7619	0.0006961	0.02864	2.2727	2.2804	2.2547	2.8954	3.1271	2.9124
neg_6484	Parthenin	metab_15483	yes	up	C09523	neg	508-59-8	261.113	4.94718	M-H	C15H18O4	63.7	-	LMPR0103420001;HMDB0253304	-	-	-	-	-	Lipids and lipid-like molecules	Prenol lipids	Terpene lactones	63.7	-	-	-	1.2834	1.2885	1.2247	0.03425	0.1291	1.7112	2.0805	1.9797	1.6067	1.5517	1.5556
neg_6506	Gomphidic acid	metab_15505	yes	up	-	neg	25328-77-2	393.025	4.83337	M+Na-2H	C18H12O9	-	58.1	HMDB0033542	-	-	-	-	-	Benzenoids	Phenols	Benzenetriols and derivatives	-	58.1	-	-	3.1317	3.1188	1.8399	0.01031	0.07425	4.6169	4.1365	3.7264	2.8308	2.255	1.6982
neg_6507	Estriol	metab_15506	yes	up	C05141	neg	50-27-1;547-81-9	333.171	4.83337	M+FA-H	C18H24O3	-	75.1	HMDB0000153;HMDB0000347;PW_C000100	Steroids;Hormones and transmitters	18-Carbon atoms;Steroid hormones	map01100	Metabolism	Global and overview maps	Lipids and lipid-like molecules	Steroids and steroid derivatives	Estrane steroids	-	75.1	Metabolic pathways	Metabolic pathways	1.252	1.2397	1.0709	0.03919	0.1386	5.0618	4.8987	5.0357	4.8608	4.5926	4.5505
neg_6634	2-Keto-3-deoxy-6-phosphogluconic acid	metab_15632	yes	up	C04442	neg	27244-54-8	303.015	4.37797	M+FA-H	C6H11O9P	-	61.7	HMDB0001376	-	-	map01100;map00030;map01200	Metabolism;Metabolism;Metabolism	Global and overview maps;Carbohydrate metabolism;Global and overview maps	Organic acids and derivatives	Keto acids and derivatives	Medium-chain keto acids and derivatives	-	61.7	Metabolic pathways;Pentose phosphate pathway;Carbon metabolism	Metabolic pathways;Pentose phosphate pathway;Carbon metabolism	2.8752	2.852	1.747	0.01109	0.0776	4.2518	3.7096	3.2652	2.3992	1.7117	2.315
neg_6686	3-[[5-Methyl-2-(1-methylethyl)cyclohexyl]oxy]-1,2-propanediol	metab_15684	yes	down	-	neg	87061-04-9	275.186	4.2187	M+FA-H	C13H26O3	-	39.1	HMDB0036133	-	-	-	-	-	Lipids and lipid-like molecules	Prenol lipids	Monoterpenoids	-	39.1	-	-	3.0343	3.0395	0.5507	0.006411	0.06209	2.4314	1.5268	2.5636	4.1339	3.8909	3.818
neg_6694	4-(3-hydroxybutyl)-2-methoxyphenol	metab_15692	yes	up	-	neg	-	241.108	4.19597	M+FA-H	C11H16O3	-	47.2	-	-	-	-	-	-	-	-	-	-	47.2	-	-	2.0969	2.0819	1.2672	0.00337	0.05017	4.0522	3.651	3.9233	3.1225	2.9451	3.1064
neg_6738	11-Hydroxy-9-tridecenoic acid	metab_15736	yes	down	-	neg	105798-56-9	273.171	4.08228	M+FA-H	C13H24O3	-	53.5	HMDB0035881;LMFA01050437	-	-	-	-	-	Lipids and lipid-like molecules	Fatty Acyls	Fatty acids and conjugates	-	53.5	-	-	2.243	2.2485	0.7631	0.01959	0.09826	3.5074	2.9268	3.4984	4.6886	4.3076	4.0204
neg_6774	1-Hydroxy-3-nonanone	metab_15772	yes	down	-	neg	67801-46-1	203.128	3.9913	M+FA-H	C9H18O2	-	43.3	LMFA05000601;HMDB0037143	-	-	-	-	-	Lipids and lipid-like molecules	Fatty Acyls	Fatty alcohols	-	43.3	-	-	3.0094	3.0094	0.5271	0.004292	0.05508	2.3083	1.8373	1.6034	3.9268	3.7482	3.2297
neg_6784	Eriodictyol	metab_15782	yes	up	C05631	neg	552-58-9	287.056	3.96858	M-H	C15H12O6	82.5	-	HMDB0005810;LMPK12140002	-	-	map01100;map00941;map01110	Metabolism;Metabolism;Metabolism	Global and overview maps;Biosynthesis of other secondary metabolites;Global and overview maps	Phenylpropanoids and polyketides	Flavonoids	Flavans	82.5	-	Metabolic pathways;Flavonoid biosynthesis;Biosynthesis of secondary metabolites	Metabolic pathways;Flavonoid biosynthesis;Biosynthesis of secondary metabolites	1.289	1.2729	1.0903	0.03606	0.132	4.3538	4.0401	4.14	3.9258	3.7142	3.8553
neg_6835	8-iso-15-keto-PGE2	metab_15833	yes	up	-	neg	914804-63-0	349.202	3.85477	M-H	C20H30O5	36.1	-	HMDB0002341;LMFA03110009	-	-	-	-	-	Lipids and lipid-like molecules	Fatty Acyls	Eicosanoids	36.1	-	-	-	1.0053	0.9975	1.0459	0.02019	0.09936	4.5936	4.5702	4.6459	4.4677	4.3043	4.43
neg_6878	4''-O-Acetylafzelin	metab_15876	yes	up	-	neg	135618-17-6	519.114	3.74102	M+FA-H	C23H22O11	-	45.9	HMDB0039746	-	-	-	-	-	Phenylpropanoids and polyketides	Flavonoids	Flavonoid glycosides	-	45.9	-	-	1.5234	1.5192	1.1353	0.0008042	0.0306	3.5887	3.6036	3.5073	3.0969	3.1168	3.2126
neg_6999	Vanillic acid-4-O-glucuronide	metab_15997	yes	up	-	neg	18191-12-3	363.072	3.51303	M+Na-2H	C15H18O9	-	84.7	HMDB0060024	-	-	-	-	-	Organic oxygen compounds	Organooxygen compounds	Carbohydrates and carbohydrate conjugates	-	84.7	-	-	1.7741	1.7652	1.286	0.04801	0.1545	3.2033	3.2836	2.7148	2.6827	2.1143	2.3577
neg_7002	2-O-(6-Phospho-alpha-mannosyl)-D-glycerate	metab_16000	yes	up	C16699	neg	-	329.03	3.51303	M-H2O-H	C9H17O12P	-	73.6	HMDB0012152	-	-	-	-	-	Organic oxygen compounds	Organooxygen compounds	Carbohydrates and carbohydrate conjugates	-	73.6	-	-	1.8855	1.8675	1.4411	0.03605	0.132	2.8465	2.3216	2.1337	1.6636	1.5119	1.8906
neg_7144	3-(3-hydroxyphenyl)-7-methoxy-3,4-dihydro-2H-1-benzopyran-4-one	metab_16142	yes	up	-	neg	-	315.088	3.28508	M+FA-H	C16H14O4	-	68.6	-	-	-	-	-	-	-	-	-	-	68.6	-	-	1.8753	1.8585	1.1784	0.01488	0.08754	4.8416	4.387	4.446	3.8848	3.7053	4.0137
neg_7310	Maleylacetoacetic acid	metab_16308	yes	up	C01036	neg	5698-52-2	221.009	3.0139	M+Na-2H	C8H8O6	-	47	HMDB0002052;PW_C001376;LMFA01170114	-	-	map01100;map00350	Metabolism;Metabolism	Global and overview maps;Amino acid metabolism	Organic acids and derivatives	Keto acids and derivatives	Medium-chain keto acids and derivatives	-	47	Metabolic pathways;Tyrosine metabolism	Metabolic pathways;Tyrosine metabolism	2.5986	2.5857	1.8367	0.0008548	0.03119	2.9719	2.5827	2.5458	1.4909	1.4791	1.4403
neg_7311	2-Ethyl-2-Hydroxybutyric acid	metab_16309	yes	down	-	neg	3639-21-2	131.07	3.0139	M-H	C6H12O3	35.7	-	HMDB0001975	-	-	-	-	-	Lipids and lipid-like molecules	Fatty Acyls	Fatty acids and conjugates	35.7	-	-	-	1.3651	1.3604	0.9022	0.008239	0.06736	3.2351	3.4141	3.2911	3.7707	3.6494	3.5971
neg_7317	5-Methoxysalicylic acid	metab_16315	yes	up	-	neg	2612-02-04	167.034	2.9984	M-H	C8H8O4	70.9	-	HMDB0001868	-	-	-	-	-	Benzenoids	Benzene and substituted derivatives	Benzoic acids and derivatives	70.9	-	-	-	1.5419	1.542	1.0953	0.001395	0.03586	5.0731	5.1046	5.0257	4.5352	4.7108	4.6361
neg_7330	(E)-8-Hydroxy-2-octene-4,6-diynoic acid	metab_16328	yes	up	-	neg	65367-65-9	195.029	2.97622	M+FA-H	C8H6O3	-	54.3	HMDB0031515	-	-	-	-	-	Lipids and lipid-like molecules	Fatty Acyls	Fatty acids and conjugates	-	54.3	-	-	1.2904	1.2898	1.0685	0.003041	0.04815	4.9087	4.8847	4.8053	4.4997	4.6255	4.5358
neg_7397	Kainic acid	metab_16395	yes	down	C12819	neg	487-79-6	212.092	2.8853	M-H	C10H15NO4	39.3	-	HMDB0253757	-	-	-	-	-	Organic acids and derivatives	Carboxylic acids and derivatives	Amino acids, peptides, and analogues	39.3	-	-	-	1.1116	1.1166	0.8861	0.02774	0.1176	2.1494	1.8845	2.0335	2.2783	2.2899	2.2779
neg_7647	Myricetin	metab_16645	yes	up	C10107	neg	529-44-2	317.03	2.56447	M-H	C15H10O8	41.5	-	HMDB0002755;LMPK12110001	-	-	map00941;map01110;map00944	Metabolism;Metabolism;Metabolism	Biosynthesis of other secondary metabolites;Global and overview maps;Biosynthesis of other secondary metabolites	Phenylpropanoids and polyketides	Flavonoids	Flavones	41.5	-	Flavonoid biosynthesis;Biosynthesis of secondary metabolites;Flavone and flavonol biosynthesis	Flavonoid biosynthesis;Biosynthesis of secondary metabolites;Flavone and flavonol biosynthesis	2.3937	2.3865	1.3997	0.0003449	0.02087	3.7644	3.5748	3.5651	2.6004	2.7068	2.4831
neg_7711	Isoleucyl-Isoleucine	metab_16709	yes	down	-	neg	-	243.171	2.496	M-H	C12H24N2O3	-	51.4	HMDB0028910	-	-	-	-	-	Organic acids and derivatives	Carboxylic acids and derivatives	Amino acids, peptides, and analogues	-	51.4	-	-	1.9265	1.9191	0.7868	0.0007103	0.02887	2.3968	2.6112	2.4725	3.2367	3.1185	3.1545
neg_7719	Flavanomarein	metab_16717	yes	up	-	neg	-	449.109	2.47328	M-H	C21H22O11	62.3	-	-	-	-	-	-	-	-	-	-	62.3	-	-	-	1.7975	1.7798	1.2284	0.0443	0.1486	4.0691	3.3141	3.7691	3.1437	3.0942	2.8398
neg_7775	Taxifolin 3-arabinoside	metab_16773	yes	up	-	neg	-	435.094	2.40465	M-H	C20H20O11	-	47.9	HMDB0041418	-	-	-	-	-	Phenylpropanoids and polyketides	Diarylheptanoids	Cyclic diarylheptanoids	-	47.9	-	-	1.0016	1.0028	1.0699	0.01668	0.09236	3.1	3.17	3.0031	2.8585	2.8972	2.912
neg_7813	Wyeronic acid	metab_16811	yes	up	-	neg	117783-52-5	275.056	2.3586	M+FA-H	C13H10O4	-	45.9	HMDB0039141	-	-	-	-	-	Lipids and lipid-like molecules	Fatty Acyls	Fatty acids and conjugates	-	45.9	-	-	2.677	2.6698	1.8283	6.012e-05	0.01141	2.9215	2.8421	2.766	1.4419	1.5923	1.6299
neg_7885	N-[4'-hydroxy-(E)-cinnamoyl]-L-aspartic acid	metab_16883	yes	down	-	neg	-	278.067	2.26862	M-H	C13H13NO6	-	40.3	HMDB0029234	-	-	-	-	-	Organic acids and derivatives	Carboxylic acids and derivatives	Amino acids, peptides, and analogues	-	40.3	-	-	1.1491	1.1503	0.9425	0.005504	0.05939	4.1659	4.1498	4.1165	4.4092	4.3151	4.4661
neg_7926	P-Salicylic acid	metab_16924	yes	up	C00156	neg	99-96-7	137.023	2.20167	M-H	C7H6O3	78.3	-	HMDB0000500	-	-	map01100;map00130;map01110;map00790;map01240	Metabolism;Metabolism;Metabolism;Metabolism;Metabolism	Global and overview maps;Metabolism of cofactors and vitamins;Global and overview maps;Metabolism of cofactors and vitamins;Global and overview maps	Benzenoids	Benzene and substituted derivatives	Benzoic acids and derivatives	78.3	-	Metabolic pathways;Ubiquinone and other terpenoid-quinone biosynthesis;Biosynthesis of secondary metabolites;Folate biosynthesis;Biosynthesis of cofactors	Metabolic pathways;Ubiquinone and other terpenoid-quinone biosynthesis;Biosynthesis of secondary metabolites;Folate biosynthesis;Biosynthesis of cofactors	1.9947	1.9946	1.1432	0.0003718	0.02123	5.7431	5.844	5.7778	4.9694	5.1694	5.0487
neg_7942	Procyanidin B2	metab_16940	yes	up	C17639	neg	29106-49-8	577.135	2.1562	M-H	C30H26O12	94.7	-	LMPK12030002;HMDB0033973	-	-	-	-	-	Phenylpropanoids and polyketides	Flavonoids	Biflavonoids and polyflavonoids	94.7	-	-	-	1.0193	1.0098	1.0383	0.02907	0.12	5.9201	5.7176	5.7474	5.5677	5.5725	5.6039
neg_7996	AESCULIN	metab_16993	yes	down	C09264	neg	531-75-9	339.072	2.0893	M-H	C15H16O9	36.9	-	HMDB0030820	-	-	-	-	-	Phenylpropanoids and polyketides	Coumarins and derivatives	Coumarin glycosides	36.9	-	-	-	1.8845	1.8842	0.7266	0.02371	0.1091	2.2184	1.6192	1.9914	2.5853	2.8908	2.547
neg_8055	Valyl-Isoleucine	metab_17051	yes	down	-	neg	20556-14-3	229.155	2.023	M-H	C11H22N2O3	-	59.1	HMDB0029130	-	-	-	-	-	Organic acids and derivatives	Carboxylic acids and derivatives	Amino acids, peptides, and analogues	-	59.1	-	-	1.7797	1.7751	0.8302	0.002713	0.04575	2.9049	3.0074	2.7545	3.5513	3.506	3.3813
neg_8058	Vanillin	metab_17054	yes	up	C00755	neg	121-33-5	151.039	2.023	M-H	C8H8O3	41.1	-	HMDB0245834;HMDB0012308;MJDBOTE0000374	-	-	map01100;map01110;map00998	Metabolism;Metabolism;Metabolism	Global and overview maps;Global and overview maps;Biosynthesis of other secondary metabolites	Benzenoids	Phenols	Methoxyphenols	41.1	-	Metabolic pathways;Biosynthesis of secondary metabolites;Biosynthesis of various secondary metabolites - part 2	Metabolic pathways;Biosynthesis of secondary metabolites;Biosynthesis of various secondary metabolites - part 2	1.0228	1.0226	1.0463	0.00105	0.03268	4.3443	4.3503	4.3113	4.1154	4.1795	4.1328
neg_8059	1-Methyl-4-nitroimidazole	metab_17055	yes	up	C16621	neg	3034-41-1	108.02	2.023	M-H2O-H	C4H5N3O2	-	33	PW_C040688;HMDB0060659	-	-	-	-	-	Organoheterocyclic compounds	Azoles	Imidazoles	-	33	-	-	1.3123	1.311	1.1542	0.009937	0.07253	2.5362	2.5187	2.4465	2.2613	2.2006	2.0367
neg_8187	Cynaratriol	metab_17183	yes	down	-	neg	70894-20-1	319.097	1.88938	M+K-2H	C15H22O5	-	48.9	HMDB0034983	-	-	-	-	-	Lipids and lipid-like molecules	Prenol lipids	Terpene lactones	-	48.9	-	-	1.4388	1.4425	0.8477	0.03494	0.1304	2.7396	2.3043	2.3516	2.8584	2.9638	2.9028
neg_8290	3-Methoxy-4,5-methylenedioxybenzoic acid	metab_17286	yes	down	-	neg	526-34-1	241.035	1.77495	M+FA-H	C9H8O5	-	40.3	HMDB0030800	-	-	-	-	-	Benzenoids	Benzene and substituted derivatives	Benzoic acids and derivatives	-	40.3	-	-	1.466	1.461	0.8833	0.009127	0.06993	3.153	3.0518	3.2159	3.4099	3.6488	3.6068
neg_8380	Bisnorbiotin	metab_17375	yes	up	C20384	neg	16968-98-2	261.055	1.68385	M+FA-H	C8H12N2O3S	-	43.5	HMDB0004821	-	-	map00780	Metabolism	Metabolism of cofactors and vitamins	Organic acids and derivatives	Carboxylic acids and derivatives	Amino acids, peptides, and analogues	-	43.5	Biotin metabolism	Biotin metabolism	2.1858	2.1926	1.5018	0.01571	0.09003	2.7592	2.9001	2.9955	1.4834	2.2572	2.0222
neg_8456	Valyl-Valine	metab_17451	yes	down	-	neg	3918-94-3	215.139	1.63925	M-H	C10H20N2O3	-	61.6	HMDB0029140	-	-	-	-	-	Organic acids and derivatives	Carboxylic acids and derivatives	Amino acids, peptides, and analogues	-	61.6	-	-	1.7853	1.7846	0.787	0.01318	0.0838	2.407	2.4741	2.1023	3.083	3.0166	2.773
neg_8512	N-Acetylproline	metab_17507	yes	down	-	neg	68-95-1	138.055	1.59372	M-H2O-H	C7H11NO3	-	40.7	HMDB0094701;HMDB0242126	-	-	-	-	-	Organic acids and derivatives	Carboxylic acids and derivatives	Amino acids, peptides, and analogues	-	40.7	-	-	1.0402	1.0376	0.9549	4.651e-05	0.01048	4.1222	4.0968	4.1013	4.299	4.3139	4.291
neg_8564	Guanosine	metab_17559	yes	down	C00387	neg	118-00-3	282.084	1.48172	M-H	C10H13N5O5	96.7	-	PW_C000087;HMDB0000133	Nucleic acids	Nucleosides	map01100;map02010;map00230	Metabolism;Environmental Information Processing;Metabolism	Global and overview maps;Membrane transport;Nucleotide metabolism	Nucleosides, nucleotides, and analogues	Purine nucleosides	Not Available	96.7	-	Metabolic pathways;ABC transporters;Purine metabolism	Metabolic pathways;ABC transporters;Purine metabolism	1.1665	1.1657	0.94	0.01375	0.08506	4.229	4.2917	4.1603	4.5244	4.3967	4.5709
neg_8620	Xanthine	metab_17615	yes	down	C00385	neg	69-89-6	151.025	1.39423	M-H	C5H4N4O2	81	-	PW_C000198;HMDB0000292	-	-	map01100;map01110;map00230;map00232	Metabolism;Metabolism;Metabolism;Metabolism	Global and overview maps;Global and overview maps;Nucleotide metabolism;Biosynthesis of other secondary metabolites	Organoheterocyclic compounds	Imidazopyrimidines	Purines and purine derivatives	81	-	Metabolic pathways;Biosynthesis of secondary metabolites;Purine metabolism;Caffeine metabolism	Metabolic pathways;Biosynthesis of secondary metabolites;Purine metabolism;Caffeine metabolism	1.99	1.9888	0.8051	0.004721	0.05773	3.1728	2.9601	3.196	4.0238	3.91	3.6548
neg_8656	Arborinine	metab_17650	yes	up	C10643	neg	5489-57-6	306.077	1.18197	M+Na-2H	C16H15NO4	-	32.3	HMDB0030177	-	-	-	-	-	Organoheterocyclic compounds	Quinolines and derivatives	Benzoquinolines	-	32.3	-	-	2.8669	2.8696	1.4976	0.006988	0.06384	4.5101	4.6568	5.1687	2.724	3.3398	3.5104
neg_8662	Acaciabiuronic acid	metab_17656	yes	down	-	neg	7264-19-9	337.078	1.13897	M-H2O-H	C12H20O12	-	67.2	HMDB0029938	-	-	-	-	-	Organic oxygen compounds	Organooxygen compounds	Carbohydrates and carbohydrate conjugates	-	67.2	-	-	1.1045	1.1123	0.9442	0.03521	0.1311	4.5297	4.2801	4.4473	4.6244	4.6595	4.7574
neg_8690	Valyl-Aspartate	metab_17684	yes	down	-	neg	20556-16-5	231.098	1.0313	M-H	C9H16N2O5	-	45.6	HMDB0029123	-	-	-	-	-	Organic acids and derivatives	Carboxylic acids and derivatives	Amino acids, peptides, and analogues	-	45.6	-	-	1.2822	1.2884	0.9019	0.01911	0.09733	3.1693	3.0346	3.0929	3.5806	3.3061	3.4207
neg_8698	Guanine	metab_17692	yes	down	C00242	neg	73-40-5	150.041	1.0313	M-H	C5H5N5O	91.8	-	HMDB0000132;PW_C000086	Nucleic acids	Bases	map01100;map00230	Metabolism;Metabolism	Global and overview maps;Nucleotide metabolism	Organoheterocyclic compounds	Imidazopyrimidines	Purines and purine derivatives	91.8	-	Metabolic pathways;Purine metabolism	Metabolic pathways;Purine metabolism	1.3644	1.3627	0.8969	0.00101	0.03232	2.9794	2.989	2.9812	3.4044	3.2965	3.2762
neg_8712	Oxoglutaric acid	metab_17706	yes	down	C00026	neg	328-50-7	145.013	1.00985	M-H	C5H6O5	39.9	-	HMDB0000208;PW_C000134	Organic acids	Carboxylic acids	map01100;map00630;map00310;map01110;map00300;map01240;map01210;map00340;map00040;map01200;map00220;map00053;map00250;map01230;map00020;map00650;map00660;map00430	Metabolism;Metabolism;Metabolism;Metabolism;Metabolism;Metabolism;Metabolism;Metabolism;Metabolism;Metabolism;Metabolism;Metabolism;Metabolism;Metabolism;Metabolism;Metabolism;Metabolism;Metabolism	Global and overview maps;Carbohydrate metabolism;Amino acid metabolism;Global and overview maps;Amino acid metabolism;Global and overview maps;Global and overview maps;Amino acid metabolism;Carbohydrate metabolism;Global and overview maps;Amino acid metabolism;Carbohydrate metabolism;Amino acid metabolism;Global and overview maps;Carbohydrate metabolism;Carbohydrate metabolism;Carbohydrate metabo…	Organic acids and derivatives	Keto acids and derivatives	Gamma-keto acids and derivatives	39.9	-	Metabolic pathways;Glyoxylate and dicarboxylate metabolism;Lysine degradation;Biosynthesis of secondary metabolites;Lysine biosynthesis;Biosynthesis of cofactors;2-Oxocarboxylic acid metabolism;Histidine metabolism;Pentose and glucuronate interconversions;Carbon metabolism;Arginine biosynthesis;Ascorbate and aldarate metabolism;Alanine, aspartate and glutamate metabolism;Biosynthesis of amino aci…	Metabolic pathways;Glyoxylate and dicarboxylate metabolism;Lysine degradation;Biosynthesis of secondary metabolites;Lysine biosynthesis;Biosynthesis of cofactors;2-Oxocarboxylic acid metabolism;Histidine metabolism;Pentose and glucuronate interconversions;Carbon metabolism;Arginine biosynthesis;Ascorbate and aldarate metabolism;Alanine, aspartate and glutamate metabolism;Biosynthesis of amino aci…	1.6272	1.6249	0.8612	0.004143	0.05413	3.0902	3.1726	3.0426	3.6033	3.4701	3.7331
neg_8907	D-Glucarate	metab_17900	yes	down	C00818	neg	87-73-0	209.03	0.622617	M-H	C6H10O8	65.5	-	HMDB0000663	-	-	map01100;map00053	Metabolism;Metabolism	Global and overview maps;Carbohydrate metabolism	Organic oxygen compounds	Organooxygen compounds	Carbohydrates and carbohydrate conjugates	65.5	-	Metabolic pathways;Ascorbate and aldarate metabolism	Metabolic pathways;Ascorbate and aldarate metabolism	2.0665	2.071	0.7844	0.00532	0.05939	3.2235	2.8889	2.8263	3.9516	3.663	3.7837
neg_1953	Amylose	metab_18185	yes	down	C00718	neg	9005-82-7;6118-87-2	351.13	1.79778	M-H2O-H	C2H6.[C12H20O11]n	-	40.4	HMDB0003403;HMDB0038852;PW_C001872	-	-	map01100;map00500;map01110	Metabolism;Metabolism;Metabolism	Global and overview maps;Carbohydrate metabolism;Global and overview maps	Organic oxygen compounds	Organooxygen compounds	Carbohydrates and carbohydrate conjugates	-	40.4	Metabolic pathways;Starch and sucrose metabolism;Biosynthesis of secondary metabolites	Metabolic pathways;Starch and sucrose metabolism;Biosynthesis of secondary metabolites	1.8597	1.8649	0.8622	0.005652	0.05979	4.3526	3.9988	4.1331	4.9568	4.7316	4.7938
neg_8905	D-Glucose	metab_18187	yes	down	C00031	neg	50-99-7;2280-44-6;2280-44-6;492-61-5;492-62-6	225.061	0.622617	M+FA-H	C6H12O6	-	43.7	HMDB0242534;PW_C000077;HMDB0000122;HMDB0003345	Carbohydrates	Monosaccharides	map01100;map01110;map00520;map02010;map00052;map00010;map00500;map00030	Metabolism;Metabolism;Metabolism;Environmental Information Processing;Metabolism;Metabolism;Metabolism;Metabolism	Global and overview maps;Global and overview maps;Carbohydrate metabolism;Membrane transport;Carbohydrate metabolism;Carbohydrate metabolism;Carbohydrate metabolism;Carbohydrate metabolism	Organic oxygen compounds	Organooxygen compounds	Carbohydrates and carbohydrate conjugates	-	43.7	Metabolic pathways;Biosynthesis of secondary metabolites;Amino sugar and nucleotide sugar metabolism;ABC transporters;Galactose metabolism;Glycolysis / Gluconeogenesis;Starch and sucrose metabolism;Pentose phosphate pathway	Metabolic pathways;Biosynthesis of secondary metabolites;Amino sugar and nucleotide sugar metabolism;ABC transporters;Galactose metabolism;Glycolysis / Gluconeogenesis;Starch and sucrose metabolism;Pentose phosphate pathway	1.2778	1.2755	0.9308	0.0002117	0.01955	3.9989	3.9875	3.9589	4.3128	4.2753	4.2446
neg_7965	EPIGALLOCATECHIN	metab_18189	yes	up	C12127;C12136	neg	970-74-1;490-46-0;970-73-0	305.068	2.134	M-H	C15H14O7	32	-	HMDB0302404;HMDB0038361;HMDB0001871;LMPK12020004;HMDB0038365	-	-	map00941;map01110	Metabolism;Metabolism	Biosynthesis of other secondary metabolites;Global and overview maps	Phenylpropanoids and polyketides	Flavonoids	Flavans	32	-	Flavonoid biosynthesis;Biosynthesis of secondary metabolites	Flavonoid biosynthesis;Biosynthesis of secondary metabolites	1.9872	1.9795	1.2196	0.000418	0.02149	4.097	3.9106	3.9204	3.2084	3.2994	3.2728
neg_118	L-Glutamate	metab_18192	yes	up	C00025	neg	6893-26-1;56-86-0	146.045	0.622617	M-H, M+K-2H, M-H2O-H	C5H9NO4	86.1	-	HMDB0000148;HMDB0003339;HMDB0060475	Peptides;Hormones and transmitters	Amino acids;Neurotransmitters	map01100;map00630;map00220;map01200;map00430;map01240;map01210;map00330;map02010;map00860;map00480;map01230;map00250;map00910;map00970;map00340;map01110;map00650;map00660	Metabolism;Metabolism;Metabolism;Metabolism;Metabolism;Metabolism;Metabolism;Metabolism;Environmental Information Processing;Metabolism;Metabolism;Metabolism;Metabolism;Metabolism;Genetic Information Processing;Metabolism;Metabolism;Metabolism;Metabolism	Global and overview maps;Carbohydrate metabolism;Amino acid metabolism;Global and overview maps;Metabolism of other amino acids;Global and overview maps;Global and overview maps;Amino acid metabolism;Membrane transport;Metabolism of cofactors and vitamins;Metabolism of other amino acids;Global and overview maps;Amino acid metabolism;Energy metabolism;Translation;Amino acid metabolism;Global and o…	Organic acids and derivatives	Carboxylic acids and derivatives	Amino acids, peptides, and analogues	86.1	-	Metabolic pathways;Glyoxylate and dicarboxylate metabolism;Arginine biosynthesis;Carbon metabolism;Taurine and hypotaurine metabolism;Biosynthesis of cofactors;2-Oxocarboxylic acid metabolism;Arginine and proline metabolism;ABC transporters;Porphyrin and chlorophyll metabolism;Glutathione metabolism;Biosynthesis of amino acids;Alanine, aspartate and glutamate metabolism;Nitrogen metabolism;Aminoa…	Metabolic pathways;Glyoxylate and dicarboxylate metabolism;Arginine biosynthesis;Carbon metabolism;Taurine and hypotaurine metabolism;Biosynthesis of cofactors;2-Oxocarboxylic acid metabolism;Arginine and proline metabolism;ABC transporters;Porphyrin and chlorophyll metabolism;Glutathione metabolism;Biosynthesis of amino acids;Alanine, aspartate and glutamate metabolism;Nitrogen metabolism;Aminoa…	1.3193	1.3115	1.0629	0.0008465	0.03106	5.4236	5.33	5.3254	5.0668	5.0164	5.0464
neg_6587	Phloretin	metab_18195	yes	up	C00774	neg	7507-89-3;60-82-2	273.077	4.53737	M-H	C15H14O5	55.7	-	LMPK12120525;HMDB0029646;HMDB0003306	-	-	map00941;map01110	Metabolism;Metabolism	Biosynthesis of other secondary metabolites;Global and overview maps	Organic oxygen compounds	Organooxygen compounds	Carbonyl compounds	55.7	-	Flavonoid biosynthesis;Biosynthesis of secondary metabolites	Flavonoid biosynthesis;Biosynthesis of secondary metabolites	1.7275	1.7246	1.2147	0.02348	0.1085	3.5983	3.3315	3.4426	2.5688	2.8743	3.0964
