# Supplementary material for: Metabolomics Reveals Antioxidant Metabolites in Colored Rice Grains
Source: Metabolites. 2024 Feb 11;14(2):120. doi: 10.3390/metabo14020120 (PMC10891847; doi:10.3390/metabo14020120)
Supplement: Supplementary file 1 [file metabolites-14-00120-s001.zip › Table S7.xls]

## Sheet: Difference between groups
Table S7. DM information of YJN818 and YCN1H comparison groups
ID	Metabolite	Metab ID	Significant	Regulate	KEGG Compound ID	Mode	CAS ID	M/Z	Retention time	Adducts	Formula	Fragmentation Score	Theoretical Fragmentation Score	Library ID	KEGG Compound First Category	KEGG Compound Second Category	KEGG Pathway ID	KEGG Pathway First Category	KEGG Pathway Second Category	HMDB Superclass	HMDB Class	HMDB Subclass	Fragmentation Score	Theoretical Fragmentation Score	KEGG Pathway Description	KEGG Pathway Description	VIP_pred_OPLS-DA	VIP_PLS-DA	FC(YJN818/YCN1H)	P_value	FDR	YJN818_1	YJN818_2	YJN818_3	YCN1H_1	YCN1H_2	YCN1H_3
pos_3	Gibberellin A14	metab_2	yes	up	C11858	pos	4955-22-0	349.201	3.13162	M+H, M+K, M+NH4, M+Na, 2M+NH4, 2M+Na, M+H-H2O, M+H-2H2O	C20H28O5	61.9	-	HMDB0303454;LMPR0104170015	-	-	map01100;map00904;map01110	Metabolism;Metabolism;Metabolism	Global and overview maps;Metabolism of terpenoids and polyketides;Global and overview maps	Lipids and lipid-like molecules	Prenol lipids	Diterpenoids	61.9	-	Metabolic pathways;Diterpenoid biosynthesis;Biosynthesis of secondary metabolites	Metabolic pathways;Diterpenoid biosynthesis;Biosynthesis of secondary metabolites	1.6639	1.639	1.1059	0.0004365	0.01519	6.5266	6.5995	6.4547	5.8446	5.8805	5.9814
pos_21	Citric acid	metab_20	yes	down	C00158	pos	77-92-9	215.016	1.24843	M+H-H2O, M+NH4, M+Na, M+H, M+H-2H2O	C6H8O7	83.7	-	PW_C000063;HMDB0000094	Organic acids	Carboxylic acids	map01100;map00630;map01110;map01240;map01210;map01200;map01230;map00250;map00020	Metabolism;Metabolism;Metabolism;Metabolism;Metabolism;Metabolism;Metabolism;Metabolism;Metabolism	Global and overview maps;Carbohydrate metabolism;Global and overview maps;Global and overview maps;Global and overview maps;Global and overview maps;Global and overview maps;Amino acid metabolism;Carbohydrate metabolism	Organic acids and derivatives	Carboxylic acids and derivatives	Tricarboxylic acids and derivatives	83.7	-	Metabolic pathways;Glyoxylate and dicarboxylate metabolism;Biosynthesis of secondary metabolites;Biosynthesis of cofactors;2-Oxocarboxylic acid metabolism;Carbon metabolism;Biosynthesis of amino acids;Alanine, aspartate and glutamate metabolism;Citrate cycle (TCA cycle)	Metabolic pathways;Glyoxylate and dicarboxylate metabolism;Biosynthesis of secondary metabolites;Biosynthesis of cofactors;2-Oxocarboxylic acid metabolism;Carbon metabolism;Biosynthesis of amino acids;Alanine, aspartate and glutamate metabolism;Citrate cycle (TCA cycle)	1.3792	1.3585	0.9148	0.003818	0.04306	4.8368	4.7342	4.7239	5.2389	5.3022	5.0858
pos_23	12-Oxo-20-carboxy-leukotriene B4	metab_22	yes	up	-	pos	-	387.178	2.92713	M+H, M+NH4, M+Na, M+H-H2O, M+H-2H2O	C20H28O6	-	65.6	HMDB0012550;LMFA03020047	-	-	-	-	-	Lipids and lipid-like molecules	Fatty Acyls	Fatty acids and conjugates	-	65.6	-	-	1.5204	1.5011	1.1006	0.0005983	0.0176	5.7841	5.7197	5.7658	5.1334	5.2615	5.2978
pos_94	2-amino-6-hydroxyhexanoic acid	metab_93	yes	down	-	pos	-	130.086	0.687917	M+H-H2O, M+ACN+H, M+H, M+H-2H2O	C6H13NO3	-	49.4	-	-	-	-	-	-	-	-	-	-	49.4	-	-	1.74	1.7172	0.8728	2.704e-05	0.003763	4.677	4.6083	4.6109	5.2652	5.3378	5.3179
pos_143	3-amino-2-naphthoic acid	metab_141	yes	up	-	pos	-	188.071	1.92117	M+H, M+NH4, M+H-H2O	C11H9NO2	33.2	-	-	-	-	-	-	-	-	-	-	33.2	-	-	-	1.5845	1.5627	1.098	0.000481	0.01573	6.2885	6.4257	6.3424	5.7158	5.8423	5.7979
pos_171	5-[(2,4,5-trihydroxyphenyl)methyl]oxolan-2-one	metab_169	yes	up	-	pos	-	207.065	3.01817	M+ACN+H, M+ACN+Na, M+H-H2O	C11H12O5	-	55.9	-	-	-	-	-	-	-	-	-	-	55.9	-	-	1.577	1.5552	1.1109	0.003474	0.04067	5.7797	5.8279	5.8224	5.1791	5.1015	5.4096
pos_173	3-O-Caffeoyl-1-O-methylquinic acid	metab_171	yes	up	-	pos	-	369.118	3.0869	M+H-2H2O, M+H, 2M+H	C17H20O9	-	81.9	HMDB0039959	-	-	-	-	-	Organic oxygen compounds	Organooxygen compounds	Alcohols and polyols	-	81.9	-	-	1.4329	1.413	1.0883	0.005109	0.05085	5.9341	5.9951	5.9589	5.4387	5.3561	5.6425
pos_176	Methyl 3-(4-methoxyphenyl)-2-oxopropanoate	metab_174	yes	up	-	pos	-	209.081	3.17693	2M+H, 2M+NH4, M+H	C11H12O4	67.4	-	-	-	-	-	-	-	-	-	-	67.4	-	-	-	1.6597	1.6455	1.14	0.01654	0.09608	5.5799	5.5584	5.5979	4.7702	4.6767	5.2337
pos_200	4-Isopropyl-3-cyclohexene-1-carboxylic acid	metab_198	yes	up	-	pos	56424-87-4	201.149	4.24618	M+CH3OH+H, 2M+Na, 2M+NH4	C10H16O2	-	54.2	HMDB0037175	-	-	-	-	-	Lipids and lipid-like molecules	Prenol lipids	Monoterpenoids	-	54.2	-	-	1.6329	1.6133	1.142	0.001697	0.0287	5.1	4.8926	4.8462	4.3068	4.3033	4.382
pos_203	7-Epi-12-hydroxyjasmonic acid glucoside	metab_200	yes	up	-	pos	124649-25-8	389.181	4.15628	M+H, M+Na, M+NH4	C18H28O9	-	69.2	HMDB0040706	-	-	-	-	-	Lipids and lipid-like molecules	Fatty Acyls	Fatty acyl glycosides	-	69.2	-	-	3.0025	2.9635	1.7541	5.69e-06	0.001749	4.7562	4.6547	4.6073	2.6524	2.5927	2.7468
pos_204	Yucalexin P15	metab_201	yes	up	-	pos	119626-52-7	313.18	4.45065	M+H-H2O, M+NH4, M+H-2H2O	C20H26O4	-	62.9	HMDB0036753	-	-	-	-	-	Lipids and lipid-like molecules	Prenol lipids	Diterpenoids	-	62.9	-	-	1.3217	1.3076	1.101	0.01302	0.08479	4.6807	4.6834	4.6272	4.178	4.1009	4.4281
pos_225	Cortol	metab_222	yes	up	C05482	pos	516-38-1	391.245	6.76637	M+H, M+Na, M+H-H2O	C21H36O5	-	35.3	LMST02030228;HMDB0003180	-	-	-	-	-	Lipids and lipid-like molecules	Steroids and steroid derivatives	Hydroxysteroids	-	35.3	-	-	1.4153	1.4085	1.0962	0.002343	0.0339	5.3764	5.2542	5.2615	4.8119	4.9351	4.7478
pos_315	LPA(18:2(9Z,12Z)/0:0)	metab_312	yes	down	C00681	pos	-	435.25	7.8336	M+H, M+NH4, M+2Na-H	C21H39O7P	43.3	-	HMDB0007856;LMGP10050017;PW_C003907	-	-	map01100;map00564;map01110;map00561	Metabolism;Metabolism;Metabolism;Metabolism	Global and overview maps;Lipid metabolism;Global and overview maps;Lipid metabolism	Lipids and lipid-like molecules	Glycerophospholipids	Glycerophosphates	43.3	-	Metabolic pathways;Glycerophospholipid metabolism;Biosynthesis of secondary metabolites;Glycerolipid metabolism	Metabolic pathways;Glycerophospholipid metabolism;Biosynthesis of secondary metabolites;Glycerolipid metabolism	2.3244	2.3017	0.6664	0.0002899	0.01362	2.4664	2.454	2.3838	3.7606	3.4551	3.7466
pos_350	Geranyl hexanoate	metab_347	yes	up	-	pos	10032-02-7	253.216	5.38057	M+H-H2O, M+H, M+H-2H2O	C16H28O2	39.1	-	HMDB0029351	-	-	-	-	-	Lipids and lipid-like molecules	Fatty Acyls	Fatty alcohol esters	39.1	-	-	-	1.8311	1.823	1.228	0.002095	0.0321	4.2457	4.1729	4.1207	3.3771	3.5944	3.2392
pos_377	Fructoselysine	metab_374	yes	up	C16488	pos	-	309.169	4.15628	M+H, M+Na, M+H-H2O	C12H24N2O7	54.6	-	HMDB0242138;HMDB0252495	-	-	-	-	-	Organic acids and derivatives	Carboxylic acids and derivatives	Amino acids, peptides, and analogues	54.6	-	-	-	1.65	1.6181	1.1946	0.0472	0.1688	4.1631	4.9351	4.3633	3.5366	3.9213	3.8108
pos_385	Isorhamnetin-3-O-glucoside	metab_382	yes	up	-	pos	-	501.1	3.40565	M+Na, M+K, M+H	C22H22O12	97.9	-	-	-	-	-	-	-	-	-	-	97.9	-	-	-	2.8446	2.8118	1.7505	3.713e-05	0.004642	4.2774	4.2649	4.1093	2.3196	2.5529	2.3544
pos_395	Yucalexin B'11	metab_391	yes	up	-	pos	119642-80-7	285.185	3.13162	M+H-H2O, M+H, M+H-2H2O	C19H26O3	-	42.1	HMDB0036696	-	-	-	-	-	Organic oxygen compounds	Organooxygen compounds	Alcohols and polyols	-	42.1	-	-	1.5763	1.5533	1.113	0.0007016	0.01871	5.5587	5.5881	5.5223	4.9212	4.9517	5.1043
pos_409	Dryopteric acid	metab_405	yes	up	-	pos	-	349.092	2.77025	M+H, M+ACN+H, M+H-H2O	C17H16O8	39.3	-	LMPK12020078	-	-	-	-	-	-	-	-	39.3	-	-	-	1.0838	1.0706	1.0921	0.0469	0.1681	3.8668	3.8415	3.6435	3.3009	3.4927	3.6003
pos_410	1-O-E-Cinnamoyl-(6-arabinosylglucose)	metab_406	yes	up	-	pos	181373-66-0	460.181	2.68013	M+NH4, M+K, M+H-2H2O	C20H26O11	-	48.5	HMDB0030294	-	-	-	-	-	Phenylpropanoids and polyketides	Cinnamic acids and derivatives	Cinnamic acid esters	-	48.5	-	-	1.4277	1.4143	1.1715	0.006544	0.05889	3.5116	3.1957	3.3155	2.8744	2.8115	2.8687
pos_423	3-O-Caffeoylshikimic acid	metab_419	yes	up	-	pos	6082-44-6	301.07	2.28422	M+H-2H2O, M+CH3OH+H, M+H-H2O	C16H16O8	-	75.7	HMDB0030654	-	-	-	-	-	Phenylpropanoids and polyketides	Cinnamic acids and derivatives	Hydroxycinnamic acids and derivatives	-	75.7	-	-	1.4775	1.4568	1.1066	0.004126	0.04481	5.2818	5.3289	5.3049	4.7666	4.6616	4.954
pos_425	2-(1-Ethoxyethoxy)propanoic acid	metab_421	yes	up	-	pos	-	163.096	2.24048	M+H, M+NH4, M+H-2H2O	C7H14O4	-	30.7	HMDB0059918	-	-	-	-	-	Organic acids and derivatives	Carboxylic acids and derivatives	Carboxylic acids	-	30.7	-	-	1.2317	1.2121	1.0746	0.001759	0.02928	4.973	5.0488	5.015	4.7188	4.5831	4.6914
pos_434	Quercetin 3-beta-D-glucoside	metab_430	yes	up	C05623	pos	482-35-9	465.103	1.9002	M+H, M+Na, M+H-H2O	C21H20O12	44.1	-	HMDB0037362	-	-	map01100;map01110;map00944	Metabolism;Metabolism;Metabolism	Global and overview maps;Global and overview maps;Biosynthesis of other secondary metabolites	Phenylpropanoids and polyketides	Flavonoids	Flavonoid glycosides	44.1	-	Metabolic pathways;Biosynthesis of secondary metabolites;Flavone and flavonol biosynthesis	Metabolic pathways;Biosynthesis of secondary metabolites;Flavone and flavonol biosynthesis	2.0676	2.0453	1.401	0.0003866	0.0147	3.5419	3.2388	3.385	2.4029	2.4152	2.4377
pos_447	Sn-Glycero-3-phosphocholine	metab_443	yes	up	C00670	pos	28319-77-9	258.11	0.61585	M+H, M+Na, M+K	C8H20NO6P	97	-	HMDB0000086	-	-	map00565;map00564	Metabolism;Metabolism	Lipid metabolism;Lipid metabolism	Lipids and lipid-like molecules	Glycerophospholipids	Glycerophosphocholines	97	-	Ether lipid metabolism;Glycerophospholipid metabolism	Ether lipid metabolism;Glycerophospholipid metabolism	1.2782	1.2596	1.0577	0.006555	0.05889	7.1091	7.1204	7.0985	6.7669	6.5755	6.8211
pos_460	L-Valine	metab_456	yes	down	C00183	pos	72-18-4	118.086	0.6338	M+H, M+K, 2M+H	C5H11NO2	71.6	-	PW_C000704;HMDB0000883	Peptides	Amino acids	map01100;map01110;map00280;map01240;map01210;map00460;map02010;map01230;map00966;map00290;map00970;map00770	Metabolism;Metabolism;Metabolism;Metabolism;Metabolism;Metabolism;Environmental Information Processing;Metabolism;Metabolism;Metabolism;Genetic Information Processing;Metabolism	Global and overview maps;Global and overview maps;Amino acid metabolism;Global and overview maps;Global and overview maps;Metabolism of other amino acids;Membrane transport;Global and overview maps;Biosynthesis of other secondary metabolites;Amino acid metabolism;Translation;Metabolism of cofactors and vitamins	Organic acids and derivatives	Carboxylic acids and derivatives	Amino acids, peptides, and analogues	71.6	-	Metabolic pathways;Biosynthesis of secondary metabolites;Valine, leucine and isoleucine degradation;Biosynthesis of cofactors;2-Oxocarboxylic acid metabolism;Cyanoamino acid metabolism;ABC transporters;Biosynthesis of amino acids;Glucosinolate biosynthesis;Valine, leucine and isoleucine biosynthesis;Aminoacyl-tRNA biosynthesis;Pantothenate and CoA biosynthesis	Metabolic pathways;Biosynthesis of secondary metabolites;Valine, leucine and isoleucine degradation;Biosynthesis of cofactors;2-Oxocarboxylic acid metabolism;Cyanoamino acid metabolism;ABC transporters;Biosynthesis of amino acids;Glucosinolate biosynthesis;Valine, leucine and isoleucine biosynthesis;Aminoacyl-tRNA biosynthesis;Pantothenate and CoA biosynthesis	1.6678	1.6419	0.8998	0.001745	0.02926	5.7636	5.6731	5.7468	6.344	6.5163	6.2377
pos_483	Stachyose	metab_479	yes	down	C01613	pos	10094-58-3;470-55-3;470-55-3	689.211	1.18488	M+NH4, M+Na, M+K	C24H42O21	53.1	-	PW_C001923;HMDB0003553	-	-	map01100;map00052	Metabolism;Metabolism	Global and overview maps;Carbohydrate metabolism	Organic oxygen compounds	Organooxygen compounds	Carbohydrates and carbohydrate conjugates	53.1	-	Metabolic pathways;Galactose metabolism	Metabolic pathways;Galactose metabolism	2.8821	2.8649	0.5549	0.02455	0.1184	2.6327	2.7613	2.55	5.1963	5.5329	3.5856
pos_606	(R)-b-amino-isobutyric acid	metab_601	yes	down	C01205	pos	-	104.071	0.6338	M+H-H2O, M+H	C4H9NO2	69.1	-	LMFA01100049	-	-	map00240;map01100;map00280	Metabolism;Metabolism;Metabolism	Nucleotide metabolism;Global and overview maps;Amino acid metabolism	-	-	-	69.1	-	Pyrimidine metabolism;Metabolic pathways;Valine, leucine and isoleucine degradation	Pyrimidine metabolism;Metabolic pathways;Valine, leucine and isoleucine degradation	1.8018	1.7768	0.8679	0.0005805	0.01755	4.9398	4.8624	4.7083	5.6013	5.6033	5.5135
pos_715	Cytosine	metab_709	yes	up	C00380	pos	71-30-7	112.051	1.01958	M+H, 2M+Na	C4H5N3O	58.3	-	HMDB0000630	Nucleic acids	Bases	map00240;map01100	Metabolism;Metabolism	Nucleotide metabolism;Global and overview maps	Organoheterocyclic compounds	Diazines	Pyrimidines and pyrimidine derivatives	58.3	-	Pyrimidine metabolism;Metabolic pathways	Pyrimidine metabolism;Metabolic pathways	1.1738	1.1539	1.0792	0.002625	0.03573	4.2977	4.4178	4.286	3.9946	3.993	4.0606
pos_741	D-1-[(3-Carboxypropyl)amino]-1-deoxyfructose	metab_735	yes	up	-	pos	10003-63-1	266.123	0.6519	M+H-H2O, M+H	C10H19NO7	-	70.1	HMDB0038663	-	-	-	-	-	Organic acids and derivatives	Carboxylic acids and derivatives	Amino acids, peptides, and analogues	-	70.1	-	-	1.7095	1.6919	1.22	0.0355	0.1451	4.758	4.1853	3.97	3.659	3.3795	3.5458
pos_742	Tetrahydro-2-methyl-3-furanol	metab_736	yes	down	-	pos	29848-44-0	120.102	0.6519	M+NH4, M+2Na-H	C5H10O2	-	48.9	HMDB0039799	-	-	-	-	-	Organoheterocyclic compounds	Tetrahydrofurans	Not Available	-	48.9	-	-	2.7475	2.7131	0.5862	0.005291	0.05192	2.5609	2.5484	2.4782	4.7498	4.5096	3.6835
pos_767	5'-O-beta-D-Glucosylpyridoxine	metab_761	yes	up	C03996	pos	-	332.134	1.39762	M+H-H2O, M+H	C14H21NO8	37.4	-	HMDB0246884	-	-	-	-	-	Organoheterocyclic compounds	Pyridines and derivatives	Pyridoxines	37.4	-	-	-	1.0144	1.0105	1.0504	0.04988	0.1738	5.9365	5.9112	5.7884	5.5151	5.4994	5.7778
pos_826	N-Hydroxy-1-aminonaphthalene	metab_820	yes	up	C14789	pos	607-30-7	160.076	1.604	M+H, M+NH4	C10H9NO	59.7	-	HMDB0062503	-	-	-	-	-	Benzenoids	Naphthalenes	Not Available	59.7	-	-	-	2.1185	2.0819	1.2235	0.008409	0.06804	5.8717	6.2198	5.5155	4.7196	4.6975	4.9727
pos_841	Val Val	metab_835	yes	down	-	pos	-	217.155	1.64665	M+H-H2O, M+H	C10H20N2O3	50.9	-	-	-	-	-	-	-	-	-	-	50.9	-	-	-	1.1551	1.1413	0.9194	0.005789	0.05532	3.6247	3.6555	3.5614	4.0052	3.9574	3.8306
pos_853	(+)-Muscarine	metab_847	yes	up	C07473	pos	300-54-9	174.149	1.66558	M+H-H2O, M+H	C9H19NO2	39.8	-	HMDB0029936	-	-	-	-	-	Organic oxygen compounds	Organooxygen compounds	Carbohydrates and carbohydrate conjugates	39.8	-	-	-	1.3184	1.3029	1.1032	0.01295	0.08479	4.4754	4.6767	4.4077	4.2069	4.0701	4.0138
pos_873	4-Hydroxy-3-methoxycinnamaldehyde	metab_867	yes	up	C02666	pos	458-36-6;20649-42-7	179.07	1.70598	M+H, M+NH4	C10H10O3	36.7	-	HMDB0141782	-	-	map01100;map00940;map01110	Metabolism;Metabolism;Metabolism	Global and overview maps;Biosynthesis of other secondary metabolites;Global and overview maps	Benzenoids	Phenols	Methoxyphenols	36.7	-	Metabolic pathways;Phenylpropanoid biosynthesis;Biosynthesis of secondary metabolites	Metabolic pathways;Phenylpropanoid biosynthesis;Biosynthesis of secondary metabolites	1.7322	1.7073	1.1404	0.0002621	0.01321	5.4891	5.4964	5.4899	4.8555	4.707	4.8868
pos_902	Leu Val Ala	metab_896	yes	down	-	pos	-	302.207	1.79115	M+H, M+Na	C14H27N3O4	61	-	-	-	-	-	-	-	-	-	-	61	-	-	-	1.6174	1.606	0.751	0.01198	0.0807	1.9679	1.9555	1.8859	2.7925	2.3027	2.6386
pos_921	Procyanidin C1	metab_915	yes	up	C17624	pos	37064-30-5	867.212	1.83447	M+H, M+Na	C45H38O18	-	41.4	HMDB0038370	-	-	-	-	-	Phenylpropanoids and polyketides	Flavonoids	Biflavonoids and polyflavonoids	-	41.4	-	-	2.7686	2.7413	1.4126	0.000228	0.01237	6.1277	5.8046	5.8372	4.0918	4.3747	4.1122
pos_964	Citrusin E	metab_958	yes	down	-	pos	134860-03-0	395.131	1.98207	M+Na, M+K	C17H24O9	-	56.9	HMDB0039234	-	-	-	-	-	Organic oxygen compounds	Organooxygen compounds	Carbohydrates and carbohydrate conjugates	-	56.9	-	-	1.6731	1.6803	0.8414	0.01881	0.1033	3.6231	4.0414	3.6375	4.3503	4.3524	4.7274
pos_965	L-Threo-3-Phenylserine	metab_959	yes	up	C03290	pos	6254-48-4	146.06	1.92117	M+H-2H2O, M+ACN+H	C9H11NO3	-	69.3	HMDB0002184	-	-	-	-	-	Organic acids and derivatives	Carboxylic acids and derivatives	Amino acids, peptides, and analogues	-	69.3	-	-	1.0171	1.0013	1.0471	0.002877	0.03766	5.2784	5.3585	5.2885	5.0152	5.0959	5.0955
pos_988	3,4-Dihydroxybenzaldehyde	metab_982	yes	up	C16700	pos	139-85-5	139.039	2.0689	M+H-H2O, M+H	C7H6O3	39.3	-	HMDB0059965	-	-	map00950	Metabolism	Biosynthesis of other secondary metabolites	Organic oxygen compounds	Organooxygen compounds	Carbonyl compounds	39.3	-	Isoquinoline alkaloid biosynthesis	Isoquinoline alkaloid biosynthesis	1.515	1.4969	1.1397	0.001588	0.02809	4.4447	4.2857	4.2158	3.7884	3.7596	3.8114
pos_1001	Oleuroside	metab_995	yes	up	-	pos	116383-31-4	579.15	2.15398	M+CH3OH+H, M+K	C25H32O13	-	60	HMDB0035352	-	-	-	-	-	Lipids and lipid-like molecules	Prenol lipids	Sesquiterpenoids	-	60	-	-	2.7396	2.7063	1.4524	0.0002587	0.01321	5.6964	5.3172	5.3135	3.6689	3.7167	3.8561
pos_1003	Butyl 3-O-caffeoylquinate	metab_997	yes	up	-	pos	132741-56-1	393.152	2.17605	M+H-H2O, M+ACN+Na	C20H26O9	-	52.9	HMDB0034588	-	-	-	-	-	Organic oxygen compounds	Organooxygen compounds	Alcohols and polyols	-	52.9	-	-	1.5248	1.5038	1.1358	0.0005261	0.01666	4.4385	4.426	4.3365	3.797	3.8884	3.9354
pos_1014	(E)-10-Hydroxy-2-decene-4,6-diynoic acid	metab_1008	yes	up	-	pos	-	211.096	2.19847	M+H-H2O, M+CH3OH+H	C10H10O3	-	54.5	HMDB0038965	-	-	-	-	-	Lipids and lipid-like molecules	Fatty Acyls	Fatty acids and conjugates	-	54.5	-	-	1.2243	1.2014	1.096	0.01786	0.1003	4.2077	4.4075	4.1217	3.8462	3.8151	3.9618
pos_1022	Sambucus nigra Degraded cyanogenic glycosides (2'-Epimer)	metab_1016	yes	down	-	pos	-	417.118	2.26277	M+H-H2O, M+ACN+Na	C16H19NO8	-	48.5	HMDB0035502	-	-	-	-	-	Organic oxygen compounds	Organooxygen compounds	Carbohydrates and carbohydrate conjugates	-	48.5	-	-	1.4477	1.4314	0.8292	0.002295	0.03373	2.3929	2.46	2.2259	2.8321	2.8663	2.8402
pos_1025	1-Oxo-1H-2-benzopyran-3-carboxaldehyde	metab_1019	yes	up	-	pos	34328-51-3	207.065	2.28422	M+H, M+CH3OH+H	C10H6O3	59.1	-	HMDB0030577	-	-	-	-	-	Phenylpropanoids and polyketides	Isocoumarins and derivatives	Not Available	59.1	-	-	-	1.5377	1.5177	1.1076	0.006799	0.06042	5.7687	5.8148	5.8009	5.195	5.0653	5.4361
pos_1029	1-O-Sinapoylglucose	metab_1023	yes	up	-	pos	-	387.128	2.28422	M+H, M+NH4	C17H22O10	45.2	-	HMDB0041175	-	-	-	-	-	Phenylpropanoids and polyketides	Cinnamic acids and derivatives	Hydroxycinnamic acids and derivatives	45.2	-	-	-	1.5944	1.5723	1.144	0.003719	0.04254	4.6985	4.7378	4.6952	4.0754	3.9735	4.3013
pos_1069	2-[2,4,6-trihydroxy-3-(3-methylbut-2-en-1-yl)phenyl]acetic acid	metab_1063	yes	up	-	pos	-	235.096	2.47772	M+H-H2O, M+NH4	C13H16O5	-	53.5	-	-	-	-	-	-	-	-	-	-	53.5	-	-	1.2462	1.2313	1.1087	0.0001651	0.01078	3.5702	3.5512	3.5582	3.2598	3.1784	3.1945
pos_1073	(S)-Edulinine	metab_1067	yes	up	-	pos	27495-36-9	330.11	2.5	M+K, M+ACN+Na	C16H21NO4	-	74.2	HMDB0030178	-	-	-	-	-	Organoheterocyclic compounds	Quinolines and derivatives	Quinolones and derivatives	-	74.2	-	-	2.5127	2.4768	1.5283	0.001358	0.02566	4.0969	4.1899	4.2538	2.5972	2.5223	3.0841
pos_1089	(+)-Lyoniresinol 9-glucoside	metab_1083	yes	up	-	pos	-	600.265	2.54483	M+NH4, M+Na	C28H38O13	-	53.3	HMDB0041148	-	-	-	-	-	Lignans, neolignans and related compounds	Lignan glycosides	Not Available	-	53.3	-	-	1.8587	1.8392	1.2009	0.0209	0.1091	5.37	5.1871	5.0799	4.396	3.9329	4.69
pos_1124	Morin 3,7,4'-trimethyl ether 2'-glucoside	metab_1118	yes	up	-	pos	-	507.15	2.70265	M+H, M+CH3OH+H	C24H26O12	48	-	LMPK12112511	-	-	-	-	-	-	-	-	48	-	-	-	1.9642	1.9349	1.2765	0.009915	0.0736	4.1831	4.4928	4.1923	3.202	3.1712	3.7072
pos_1127	(7'x,8'x)-4,7'-Epoxy-3,8'-bilign-7-ene-3,5'-dimethoxy-4',9,9'-triol	metab_1121	yes	up	-	pos	-	359.149	2.72525	M+H-2H2O, M+H	C20H22O6	37.1	-	HMDB0041276	-	-	-	-	-	Phenylpropanoids and polyketides	2-arylbenzofuran flavonoids	Not Available	37.1	-	-	-	2.292	2.2918	1.5229	0.004208	0.04525	3.6778	3.5894	3.5245	2.5409	2.5931	1.9514
pos_1141	5-O-Methylvisamminol	metab_1135	yes	up	C09016	pos	80681-42-1	273.112	2.77025	M+H-H2O, M+H	C16H18O5	31.5	-	LMPK13110002	-	-	-	-	-	-	-	-	31.5	-	-	-	1.4601	1.4388	1.1896	0.002053	0.03163	3.1037	3.1208	3.0182	2.5425	2.5151	2.711
pos_1162	1-Methylestra-1,3,5(10),6-tetraene-3,17beta-diol	metab_1155	yes	up	C15255	pos	-	285.185	2.81553	M+H, M+NH4	C19H24O2	62.8	-	-	-	-	-	-	-	-	-	-	62.8	-	-	-	1.3344	1.3178	1.0938	0.002954	0.03822	4.9234	4.818	4.8072	4.3449	4.4298	4.5269
pos_1181	Nafenopin	metab_1174	yes	up	C11371	pos	3771-19-5	311.164	2.90442	M+H-H2O, M+H	C20H22O3	43.2	-	HMDB0255421	-	-	-	-	-	Benzenoids	Benzene and substituted derivatives	Phenoxyacetic acid derivatives	43.2	-	-	-	1.4056	1.392	1.1064	0.001998	0.03129	4.7918	4.7001	4.7937	4.2069	4.4004	4.3043
pos_1233	3-Methoxy-4-hydroxyphenylethylene glycol	metab_1226	yes	up	-	pos	-	167.07	3.10927	M+H-H2O, 2M+H	C9H12O4	48.8	-	-	-	-	-	-	-	-	-	-	48.8	-	-	-	1.2515	1.2344	1.0935	0.0005291	0.01666	4.1686	4.1367	4.1516	3.7744	3.7537	3.8636
pos_1242	Cortisol	metab_1235	yes	up	C00735	pos	50-23-7	380.243	3.13162	M+NH4, M+K	C21H30O5	-	56.2	HMDB0000063;LMST02030001;PW_C000045	Steroids;Hormones and transmitters	21-Carbon atoms;Steroid hormones	map01100	Metabolism	Global and overview maps	Lipids and lipid-like molecules	Steroids and steroid derivatives	Hydroxysteroids	-	56.2	Metabolic pathways	Metabolic pathways	1.2066	1.1873	1.0675	0.003425	0.04067	5.3069	5.4493	5.2722	4.9964	5.0057	5.0132
pos_1268	2,3-Diketo-13,14-dihydro-PGF1a	metab_1261	yes	up	-	pos	-	367.211	3.24553	M+H, M+Na	C20H30O6	84.6	-	-	-	-	-	-	-	-	-	-	84.6	-	-	-	1.2046	1.2007	1.0868	0.01702	0.09747	4.642	4.4765	4.6295	4.1148	4.3659	4.1714
pos_1269	4-hydroxy-7-methyl-5H-furo[2,3-g]isochromen-5-one	metab_1262	yes	up	-	pos	-	249.076	3.24553	M+H, M+CH3OH+H	C12H8O4	-	33.6	-	-	-	-	-	-	-	-	-	-	33.6	-	-	1.6816	1.668	1.1938	0.01861	0.1027	4.359	4.3448	4.3967	3.447	3.5009	4.0253
pos_1276	Phlorizin	metab_1269	yes	up	C01604	pos	60-81-1	437.144	3.26842	M+H-H2O, M+H	C21H24O10	-	68.8	HMDB0036634	-	-	map00941;map01110	Metabolism;Metabolism	Biosynthesis of other secondary metabolites;Global and overview maps	Phenylpropanoids and polyketides	Flavonoids	Flavonoid glycosides	-	68.8	Flavonoid biosynthesis;Biosynthesis of secondary metabolites	Flavonoid biosynthesis;Biosynthesis of secondary metabolites	1.4787	1.4649	1.1493	0.02698	0.1248	4.6723	4.227	4.2182	3.666	3.8307	3.9143
pos_1277	20-Oxo-leukotriene E4	metab_1270	yes	up	-	pos	-	454.226	3.26842	M+H, M+Na	C23H35NO6S	-	33.5	HMDB0012642;LMFA03020065	-	-	-	-	-	Lipids and lipid-like molecules	Fatty Acyls	Eicosanoids	-	33.5	-	-	2.0457	2.0199	1.2741	0.0008202	0.01995	4.5736	4.4039	4.3289	3.3328	3.5204	3.5886
pos_1293	Clavirin I	metab_1286	yes	up	-	pos	-	291.159	3.33705	M+H-H2O, M+H	C17H22O4	41.1	-	LMFA03120025	-	-	-	-	-	-	-	-	41.1	-	-	-	1.9218	1.8885	1.2708	0.00345	0.04067	3.8357	4.2756	3.9384	3.1726	3.0898	3.2193
pos_1310	4-hydroxy-5-(4-hydroxy-3-methoxyphenyl)pentanoic acid	metab_1303	yes	up	-	pos	-	263.091	3.40565	M+H, M+Na	C12H16O5	-	43.8	-	-	-	-	-	-	-	-	-	-	43.8	-	-	1.5384	1.5168	1.139	0.0001622	0.01078	4.3556	4.3547	4.3638	3.7939	3.7822	3.9033
pos_1321	6-(4-ethenyl-3-hydroxyphenoxy)-3,4,5-trihydroxyoxane-2-carboxylic acid	metab_1314	yes	up	-	pos	-	313.092	3.47398	M+H-H2O, M+H	C14H16O8	-	35	-	-	-	-	-	-	-	-	-	-	35	-	-	1.1308	1.1227	1.0855	0.001779	0.02943	3.6962	3.7471	3.7564	3.4236	3.5059	3.3872
pos_1327	Lirioresinol A	metab_1320	yes	up	-	pos	21453-71-4	419.17	3.49672	M+H-2H2O, M+H	C22H26O8	40.2	-	HMDB0038928	-	-	-	-	-	Lignans, neolignans and related compounds	Furanoid lignans	Not Available	40.2	-	-	-	2.0299	2.011	1.2656	0.0189	0.1034	4.9211	4.923	4.9092	3.8342	3.4447	4.3781
pos_1381	5-Deoxykievitol	metab_1374	yes	up	-	pos	104380-54-3	357.133	3.76948	M+H-H2O, M+H	C20H20O6	38.1	-	HMDB0038774;LMPK12050460	-	-	-	-	-	Phenylpropanoids and polyketides	Isoflavonoids	Isoflavans	38.1	-	-	-	1.5909	1.572	1.1805	0.005842	0.05554	4.0497	3.8832	3.8996	3.1514	3.3856	3.4864
pos_1404	Leukotriene C5	metab_1397	yes	up	-	pos	75207-09-9	624.295	3.88337	M+H, M+Na	C30H45N3O9S	-	65.7	HMDB0012993	-	-	-	-	-	Organic acids and derivatives	Carboxylic acids and derivatives	Amino acids, peptides, and analogues	-	65.7	-	-	1.5013	1.4969	1.1366	0.04502	0.1643	5.3142	4.838	5.2454	4.3231	4.4031	4.8208
pos_1440	Idebenone	metab_1433	yes	up	-	pos	-	361.199	4.17895	M+H, M+Na	C19H30O5	62.6	-	HMDB0253376	-	-	-	-	-	Not Available	Not Available	Not Available	62.6	-	-	-	1.448	1.4305	1.1227	0.000691	0.0187	4.3882	4.3007	4.4344	3.8405	3.8985	3.9503
pos_1452	Testolic acid	metab_1445	yes	up	C01618	pos	-	321.206	4.29172	M+H, M+Na	C19H28O4	70.8	-	LMST02020081	-	-	-	-	-	-	-	-	70.8	-	-	-	1.8565	1.8336	1.1747	0.0009667	0.02152	5.3261	5.1974	5.3913	4.3852	4.5352	4.6279
pos_1465	(8)-Gingerol	metab_1458	yes	up	C17495	pos	23513-08-8	323.222	4.17895	M+H, M+Na	C19H30O4	48.9	-	HMDB0033615	-	-	-	-	-	Benzenoids	Phenols	Methoxyphenols	48.9	-	-	-	1.5465	1.5292	1.1338	0.005227	0.05155	4.8139	4.6759	4.9506	4.1154	4.2925	4.3267
pos_1467	Gibberellin A2	metab_1460	yes	up	-	pos	-	351.18	4.15628	M+H, M+Na	C19H26O6	84.1	-	LMPR0104070003	-	-	-	-	-	-	-	-	84.1	-	-	-	1.3189	1.3079	1.1214	0.01469	0.09079	4.028	3.8927	4.0238	3.4955	3.4197	3.7349
pos_1474	Pindone	metab_1467	yes	up	C19141	pos	83-26-1	231.101	4.45065	M+H-H2O, M+H	C14H14O3	63.7	-	HMDB0256560	-	-	-	-	-	Benzenoids	Indanes	Indanones	63.7	-	-	-	1.802	1.7858	1.4339	0.01154	0.07888	2.5574	2.4827	2.8309	2.1203	1.6743	1.6961
pos_1534	(all-E)-Crocetin	metab_1527	yes	up	-	pos	27876-94-4	329.175	5.03568	M+H-H2O, M+H	C20H24O4	43.1	-	HMDB0035098	-	-	-	-	-	Lipids and lipid-like molecules	Prenol lipids	Diterpenoids	43.1	-	-	-	1.4322	1.4287	1.1482	0.03466	0.1438	4.292	4.0735	4.2594	3.5066	3.5067	3.9826
pos_1668	15-Hydroxyleptocarpin	metab_1661	yes	up	-	pos	121541-07-9	401.158	2.95002	M+H-2H2O, M+Na	C20H26O7	-	55	HMDB0036694	-	-	-	-	-	Lipids and lipid-like molecules	Prenol lipids	Terpene lactones	-	55	-	-	1.8932	1.8685	1.2004	0.0001349	0.009796	4.8158	4.7773	4.8713	3.9275	4.0246	4.0959
pos_1739	3,4,5-trihydroxy-6-[3-(2-phenylcyclobutyl)phenoxy]oxane-2-carboxylic acid	metab_1732	yes	up	-	pos	-	401.16	2.5	M+H-H2O, M+H	C22H24O7	-	30.2	-	-	-	-	-	-	-	-	-	-	30.2	-	-	2.684	2.6461	1.4439	0.0003095	0.01396	5.2365	5.2346	5.3865	3.6406	3.4474	3.8961
pos_1816	Sterol	metab_1809	yes	down	C00370	pos	-	249.221	7.39763	M+H-H2O, M+H	C17H28O	34.2	-	HMDB0060512	-	-	-	-	-	Lipids and lipid-like molecules	Steroids and steroid derivatives	Hydroxysteroids	34.2	-	-	-	1.4237	1.4025	0.8928	0.004424	0.04682	3.9595	3.9694	3.9628	4.329	4.6002	4.3901
pos_1844	PC(15:0/0:0)	metab_1837	yes	up	C04230	pos	-	482.326	7.59252	M+H, M+Na	C23H48NO7P	65.5	-	HMDB0010375;HMDB0010381;LMGP01050016	Lipids	Phospholipids	map00564	Metabolism	Lipid metabolism	Lipids and lipid-like molecules	Glycerophospholipids	Glycerophosphocholines	65.5	-	Glycerophospholipid metabolism	Glycerophospholipid metabolism	1.0422	1.0247	1.0459	0.002596	0.03553	5.6505	5.7592	5.7346	5.4485	5.4443	5.4999
pos_1880	PA(20:5(5Z,8Z,11Z,14Z,17Z)/0:0)	metab_1873	yes	down	-	pos	-	457.232	7.8336	M+H, M+2Na-H	C23H37O7P	33.4	-	LMGP10050033	-	-	-	-	-	-	-	-	33.4	-	-	-	1.2956	1.2893	0.9013	0.01487	0.09125	3.8834	3.8656	3.6759	4.3093	4.0712	4.2944
pos_1886	Palmitic acid	metab_1879	yes	down	C00249	pos	1957-10-03	239.237	7.91952	M+H-H2O, M+H	C16H32O2	-	30.8	HMDB0303203;HMDB0000220;LMFA01010001;PW_C000145	Lipids	Fatty acids	map01100;map00071;map01212;map00073;map00061;map00062;map01040	Metabolism;Metabolism;Metabolism;Metabolism;Metabolism;Metabolism;Metabolism	Global and overview maps;Lipid metabolism;Global and overview maps;Lipid metabolism;Lipid metabolism;Lipid metabolism;Lipid metabolism	Lipids and lipid-like molecules	Fatty Acyls	Fatty acids and conjugates	-	30.8	Metabolic pathways;Fatty acid degradation;Fatty acid metabolism;Cutin, suberine and wax biosynthesis;Fatty acid biosynthesis;Fatty acid elongation;Biosynthesis of unsaturated fatty acids	Metabolic pathways;Fatty acid degradation;Fatty acid metabolism;Cutin, suberine and wax biosynthesis;Fatty acid biosynthesis;Fatty acid elongation;Biosynthesis of unsaturated fatty acids	1.7666	1.7427	0.8419	0.003743	0.04274	3.9678	3.774	3.8728	4.3895	4.7349	4.6709
pos_1925	Thr Ala Leu Glu	metab_1918	yes	up	-	pos	-	433.232	8.30415	M+H, M+Na	C18H32N4O8	49.7	-	-	-	-	-	-	-	-	-	-	49.7	-	-	-	1.4341	1.4198	1.1507	0.008451	0.06821	3.9515	3.8	3.6114	3.2526	3.3493	3.2727
pos_1937	13(S)-HODE methyl ester	metab_1930	yes	down	-	pos	-	311.258	8.30415	M+H-H2O, M+H	C19H34O3	66.5	-	-	-	-	-	-	-	-	-	-	66.5	-	-	-	1.6024	1.5785	0.8652	0.0002761	0.0133	3.7632	3.6767	3.6936	4.3333	4.3242	4.2085
pos_2004	Ethyltestosterone	metab_1997	yes	down	-	pos	1235-97-8	349.273	8.96722	M+CH3OH+H, 2M+K	C21H32O2	-	50.5	HMDB0006002;LMST02030201	-	-	-	-	-	Lipids and lipid-like molecules	Steroids and steroid derivatives	Pregnane steroids	-	50.5	-	-	1.3395	1.3213	0.8921	0.0477	0.1695	4.2039	4.1504	3.7732	4.3413	4.7141	4.5377
pos_2082	DGDG(18:3/18:3)	metab_2075	yes	up	-	pos	-	959.569	9.39297	M+NH4, M+Na	C51H84O15	82.7	-	-	-	-	-	-	-	-	-	-	82.7	-	-	-	1.1741	1.1557	1.0592	0.00339	0.04062	5.6815	5.7426	5.7463	5.4276	5.3118	5.469
pos_2135	Cer(d16:1(4E)/20:0(2OH))	metab_2128	yes	up	-	pos	-	582.545	10.097	M+H-H2O, M+H	C36H71NO4	43.2	-	LMSP02010084	-	-	-	-	-	-	-	-	43.2	-	-	-	2.2174	2.1872	1.3339	0.0006216	0.01791	4.3542	4.4392	4.5569	3.5054	3.1656	3.3367
pos_2158	PE-NMe2(15:0/22:5(7Z,10Z,13Z,16Z,19Z))	metab_2151	yes	up	C04308	pos	-	780.552	9.67072	M+H, M+Na	C44H78NO8P	-	37.8	PW_C059952;HMDB0113936	-	-	map01100;map00564;map01110	Metabolism;Metabolism;Metabolism	Global and overview maps;Lipid metabolism;Global and overview maps	Lipids and lipid-like molecules	Glycerophospholipids	Glycerophosphoethanolamines	-	37.8	Metabolic pathways;Glycerophospholipid metabolism;Biosynthesis of secondary metabolites	Metabolic pathways;Glycerophospholipid metabolism;Biosynthesis of secondary metabolites	1.3689	1.3514	1.0879	0.01105	0.07709	5.5856	5.655	5.6602	5.1703	5.0122	5.3541
pos_2463	Histidinal	metab_2456	yes	down	C01929	pos	23784-15-8	122.071	0.6338	M+H-H2O	C6H9N3O	-	54.6	HMDB0012234	-	-	map01100;map00340;map01110	Metabolism;Metabolism;Metabolism	Global and overview maps;Amino acid metabolism;Global and overview maps	Organic nitrogen compounds	Organonitrogen compounds	Amines	-	54.6	Metabolic pathways;Histidine metabolism;Biosynthesis of secondary metabolites	Metabolic pathways;Histidine metabolism;Biosynthesis of secondary metabolites	1.0494	1.0483	0.9446	0.004311	0.04613	4.3804	4.4629	4.4449	4.6653	4.6412	4.7619
pos_2469	Thiamine	metab_2462	yes	down	C00378	pos	70-16-6;59-43-8	265.112	0.6338	M+H	C12H16N4OS	60.6	-	HMDB0302835;HMDB0000235;PW_C000158;HMDB0303167	Vitamins and cofactors	Vitamins	map01100;map00730;map04122;map02010;map01240	Metabolism;Metabolism;Genetic Information Processing;Environmental Information Processing;Metabolism	Global and overview maps;Metabolism of cofactors and vitamins;Folding, sorting and degradation;Membrane transport;Global and overview maps	Organoheterocyclic compounds	Diazines	Pyrimidines and pyrimidine derivatives	60.6	-	Metabolic pathways;Thiamine metabolism;Sulfur relay system;ABC transporters;Biosynthesis of cofactors	Metabolic pathways;Thiamine metabolism;Sulfur relay system;ABC transporters;Biosynthesis of cofactors	1.0929	1.0876	0.9425	0.00167	0.02869	4.4949	4.5568	4.5331	4.8116	4.7454	4.8552
pos_2573	4-Acetamido-2-aminobutanoic acid	metab_2566	yes	up	C06442	pos	1190-46-1	125.071	1.00018	M+H-2H2O	C6H12N2O3	-	62	HMDB0031411	-	-	map01100;map00260	Metabolism;Metabolism	Global and overview maps;Amino acid metabolism	Organic acids and derivatives	Carboxylic acids and derivatives	Amino acids, peptides, and analogues	-	62	Metabolic pathways;Glycine, serine and threonine metabolism	Metabolic pathways;Glycine, serine and threonine metabolism	1.242	1.2249	1.1026	0.0002429	0.0128	3.7211	3.7577	3.676	3.3416	3.3864	3.3865
pos_2628	3-Isopropylmalate	metab_2621	yes	down	C04411	pos	126576-14-5	218.102	1.22722	M+ACN+H	C7H12O5	-	61.8	HMDB0012156	-	-	map01100;map01210;map01110;map01230;map00290	Metabolism;Metabolism;Metabolism;Metabolism;Metabolism	Global and overview maps;Global and overview maps;Global and overview maps;Global and overview maps;Amino acid metabolism	Lipids and lipid-like molecules	Fatty Acyls	Fatty acids and conjugates	-	61.8	Metabolic pathways;2-Oxocarboxylic acid metabolism;Biosynthesis of secondary metabolites;Biosynthesis of amino acids;Valine, leucine and isoleucine biosynthesis	Metabolic pathways;2-Oxocarboxylic acid metabolism;Biosynthesis of secondary metabolites;Biosynthesis of amino acids;Valine, leucine and isoleucine biosynthesis	1.0366	1.0215	0.9445	0.005444	0.05278	4.3308	4.3299	4.2949	4.5038	4.657	4.5567
pos_2659	5-Hydroxymethyl-4-methyluracil	metab_2652	yes	down	-	pos	147-61-5	121.04	1.41967	M+H-2H2O	C6H8N2O3	-	39	HMDB0000544	-	-	-	-	-	Organoheterocyclic compounds	Diazines	Pyrimidines and pyrimidine derivatives	-	39	-	-	1.3132	1.3203	0.8866	0.0392	0.1524	3.6899	3.622	3.4517	3.8097	4.0561	4.2759
pos_2672	Ser Val	metab_2665	yes	down	-	pos	-	205.118	1.4401	M+H	C8H16N2O4	61.9	-	-	-	-	-	-	-	-	-	-	61.9	-	-	-	1.1619	1.1443	0.9261	0.001214	0.02404	3.9232	3.8282	3.8207	4.1986	4.1612	4.1363
pos_2696	L-Isoleucine	metab_2689	yes	down	C00407	pos	73-32-5;1509-34-8	132.102	1.54082	M+H	C6H13NO2	76.3	-	HMDB0000557;PW_C000112;HMDB0000172	Peptides	Amino acids	map01100;map01110;map00280;map00290;map01210;map00960;map02010;map01230;map00966;map00460;map00970	Metabolism;Metabolism;Metabolism;Metabolism;Metabolism;Metabolism;Environmental Information Processing;Metabolism;Metabolism;Metabolism;Genetic Information Processing	Global and overview maps;Global and overview maps;Amino acid metabolism;Amino acid metabolism;Global and overview maps;Biosynthesis of other secondary metabolites;Membrane transport;Global and overview maps;Biosynthesis of other secondary metabolites;Metabolism of other amino acids;Translation	Organic acids and derivatives	Carboxylic acids and derivatives	Amino acids, peptides, and analogues	76.3	-	Metabolic pathways;Biosynthesis of secondary metabolites;Valine, leucine and isoleucine degradation;Valine, leucine and isoleucine biosynthesis;2-Oxocarboxylic acid metabolism;Tropane, piperidine and pyridine alkaloid biosynthesis;ABC transporters;Biosynthesis of amino acids;Glucosinolate biosynthesis;Cyanoamino acid metabolism;Aminoacyl-tRNA biosynthesis	Metabolic pathways;Biosynthesis of secondary metabolites;Valine, leucine and isoleucine degradation;Valine, leucine and isoleucine biosynthesis;2-Oxocarboxylic acid metabolism;Tropane, piperidine and pyridine alkaloid biosynthesis;ABC transporters;Biosynthesis of amino acids;Glucosinolate biosynthesis;Cyanoamino acid metabolism;Aminoacyl-tRNA biosynthesis	1.2784	1.2708	0.9301	0.00132	0.02529	4.9982	4.9795	4.941	5.2908	5.3181	5.4332
pos_2705	3-Indolebutyric acid	metab_2698	yes	down	C11284	pos	133-32-4	221.128	1.56168	M+NH4	C12H13NO2	-	53.2	HMDB0002096	-	-	-	-	-	Organoheterocyclic compounds	Indoles and derivatives	Indoles	-	53.2	-	-	3.313	3.2732	0.5146	2.691e-05	0.003763	2.7009	2.7213	2.3735	5.0534	5.0297	5.0693
pos_2749	PC(4:0/0:0)	metab_2742	yes	up	-	pos	-	328.151	1.68488	M+H	C12H26NO7P	69.2	-	LMGP01050061	-	-	-	-	-	-	-	-	69.2	-	-	-	2.0642	2.0436	1.2793	0.00556	0.05355	4.3142	4.8469	4.6215	3.5959	3.7637	3.4135
pos_2775	Okanin	metab_2768	yes	up	C08724	pos	484-76-4	289.071	1.76857	M+H	C15H12O6	68.5	-	LMPK12120181;HMDB0245776	-	-	-	-	-	Phenylpropanoids and polyketides	Linear 1,3-diarylpropanoids	Chalcones and dihydrochalcones	68.5	-	-	-	3.6676	3.6307	2.6779	0.0001617	0.01078	5.0157	4.7777	4.6986	1.5891	2.2001	1.6232
pos_2822	Pro Val Val	metab_2815	yes	down	-	pos	-	314.207	1.92117	M+H	C15H27N3O4	86.6	-	-	-	-	-	-	-	-	-	-	86.6	-	-	-	1.101	1.0921	0.8845	0.0391	0.1524	2.3184	2.6586	2.5351	2.7957	2.9162	2.7813
pos_2857	Polygonolide	metab_2850	yes	up	C09963	pos	100560-66-5	221.081	2.04663	M+H	C12H12O4	46.2	-	-	-	-	-	-	-	-	-	-	46.2	-	-	-	1.7951	1.7679	1.2616	0.0003796	0.01451	3.453	3.5634	3.5006	2.7204	2.7237	2.894
pos_2867	Trans-Zeatin-riboside	metab_2860	yes	up	-	pos	-	352.161	2.08933	M+H	C15H21N5O5	60.4	-	-	-	-	-	-	-	-	-	-	60.4	-	-	-	2.4834	2.4555	1.6836	0.0003602	0.0141	3.6839	3.2782	3.3659	2.0271	2.0257	2.0823
pos_2896	4,7-dioxo-octanoic acid	metab_2889	yes	down	-	pos	-	173.081	2.26277	M+H	C8H12O4	73.7	-	LMFA01060156	-	-	-	-	-	-	-	-	73.7	-	-	-	1.568	1.5481	0.8674	0.003276	0.04001	3.7291	3.7997	3.7386	4.3623	4.4645	4.1627
pos_2903	Hydroxyprolyl-Tyrosine	metab_2896	yes	down	-	pos	-	259.108	2.28422	M+H-2H2O	C14H18N2O5	-	45.6	HMDB0028875	-	-	-	-	-	Organic acids and derivatives	Carboxylic acids and derivatives	Amino acids, peptides, and analogues	-	45.6	-	-	2.9674	2.9256	0.5636	0.0003607	0.0141	2.8123	2.4293	2.4422	4.322	4.7529	4.5566
pos_2917	Quercetin 3,7-dimethyl ether 5-glucoside	metab_2910	yes	up	-	pos	128388-46-5	493.134	2.32748	M+H	C23H24O12	56	-	HMDB0039336;LMPK12112710	-	-	-	-	-	Phenylpropanoids and polyketides	Flavonoids	Flavonoid glycosides	56	-	-	-	1.2224	1.2042	1.0933	0.002305	0.03374	3.9886	4.0487	4.0628	3.7636	3.6098	3.6926
pos_2918	Stachyoside A	metab_2911	yes	up	-	pos	131862-10-7	571.163	2.32748	M+2Na-H	C21H34O15	-	73	HMDB0039092	-	-	-	-	-	Lipids and lipid-like molecules	Prenol lipids	Terpene glycosides	-	73	-	-	1.3945	1.3751	1.0865	0.008518	0.06852	5.8302	5.9116	5.8219	5.368	5.2398	5.5577
pos_2927	13-Hydroxy-5'-O-methylmelledonal	metab_2920	yes	up	-	pos	112471-06-4	480.223	2.3692	M+NH4	C24H30O9	-	76.7	HMDB0035864	-	-	-	-	-	Lipids and lipid-like molecules	Prenol lipids	Sesquiterpenoids	-	76.7	-	-	3.3679	3.3219	1.9441	2.965e-05	0.003861	5.1412	5.1838	5.3218	2.57	2.5824	2.8963
pos_2941	Vitisin B	metab_2934	yes	up	-	pos	-	581.151	2.41213	M+ACN+Na	C25H25O12+	-	57.6	HMDB0036825	-	-	-	-	-	Organoheterocyclic compounds	Pyrrolidines	Phenylpyrrolidines	-	57.6	-	-	2.2299	2.1975	1.2833	0.0008498	0.02019	5.0628	5.1811	5.1262	3.7759	4.0051	4.1952
pos_2949	Estriol-16-Glucuronide	metab_2942	yes	up	C05504	pos	1852-50-2	482.238	2.43397	M+NH4	C24H32O9	-	56.7	HMDB0006766	-	-	-	-	-	Lipids and lipid-like molecules	Steroids and steroid derivatives	Steroidal glycosides	-	56.7	-	-	1.9899	1.9686	1.2228	0.000201	0.01205	4.8495	4.838	4.9844	4.0941	3.979	3.9255
pos_2951	4,4'-Dihydroxybiphenyl	metab_2944	yes	up	C14297	pos	92-88-6	187.076	2.45618	M+H	C12H10O2	45.2	-	-	-	-	-	-	-	-	-	-	45.2	-	-	-	1.13	1.1142	1.1174	0.001137	0.02335	2.8196	2.8023	2.7145	2.4768	2.4715	2.5129
pos_2960	Val Val Ile	metab_2953	yes	down	-	pos	-	330.239	2.47772	M+H	C16H31N3O4	87.2	-	-	-	-	-	-	-	-	-	-	87.2	-	-	-	1.6185	1.5996	0.8059	0.0007841	0.01941	2.5126	2.5707	2.3661	3.1273	3.0589	3.0563
pos_2984	Demethylsulochrin	metab_2977	yes	down	C15504	pos	-	319.081	2.58998	M+H	C16H14O7	59.1	-	-	-	-	-	-	-	-	-	-	59.1	-	-	-	1.9177	1.8901	0.7844	0.001081	0.02285	3.2325	3.0044	2.9114	3.8471	3.94	3.8743
pos_3005	Vanillylmandelic acid	metab_2998	yes	up	C05584	pos	13244-77-4;55-10-7	181.05	2.68013	M+H-H2O	C9H10O5	36.1	-	HMDB0304531;HMDB0000291;HMDB0254548;PW_C000197	-	-	map01100;map00350	Metabolism;Metabolism	Global and overview maps;Amino acid metabolism	Benzenoids	Phenols	Methoxyphenols	36.1	-	Metabolic pathways;Tyrosine metabolism	Metabolic pathways;Tyrosine metabolism	1.0587	1.0433	1.0675	0.0006233	0.01791	4.0003	4.0248	4.032	3.7316	3.751	3.8121
pos_3022	(E)-1-O-Cinnamoyl-beta-D-glucose	metab_3015	yes	up	-	pos	40004-96-4	621.216	2.72525	2M+H	C15H18O7	-	60	HMDB0030293	-	-	-	-	-	Phenylpropanoids and polyketides	Cinnamic acids and derivatives	Cinnamic acid esters	-	60	-	-	2.3108	2.2793	1.309	0.0002794	0.0133	5.1896	5.0514	5.0726	3.9325	3.729	4.0393
pos_3030	Blumealactone A	metab_3023	yes	up	-	pos	111545-46-1	428.205	2.74753	M+ACN+Na	C20H28O6	-	65	HMDB0036665	-	-	-	-	-	Lipids and lipid-like molecules	Prenol lipids	Monoterpenoids	-	65	-	-	1.8558	1.8449	1.2239	0.0008621	0.02032	4.2929	4.2413	4.356	3.5946	3.5898	3.3483
pos_3050	Apigenin 7-[rhamnosyl-(1->2)-galacturonide]	metab_3043	yes	up	-	pos	124167-97-1	625.175	2.79292	M+CH3OH+H	C27H28O15	-	43.5	HMDB0038847	-	-	-	-	-	Phenylpropanoids and polyketides	Flavonoids	Flavonoid glycosides	-	43.5	-	-	1.4165	1.3948	1.0993	0.01671	0.09629	5.4575	5.5511	5.5044	5.1117	4.7627	5.1472
pos_3058	(+)-Galbacin	metab_3051	yes	up	C10616	pos	61891-31-4	341.138	2.83688	M+H	C20H20O5	40.7	-	-	-	-	-	-	-	-	-	-	40.7	-	-	-	1.4292	1.4133	1.1312	0.0001922	0.0117	4.0099	3.9676	3.8975	3.499	3.5193	3.4778
pos_3059	7-Deoxyloganate	metab_3052	yes	up	C11636	pos	-	361.147	2.83688	M+H	C16H24O9	33.3	-	-	-	-	map01110;map00902	Metabolism;Metabolism	Global and overview maps;Metabolism of terpenoids and polyketides	-	-	-	33.3	-	Biosynthesis of secondary metabolites;Monoterpenoid biosynthesis	Biosynthesis of secondary metabolites;Monoterpenoid biosynthesis	1.3414	1.3242	1.1055	0.006989	0.0613	4.5849	4.5084	4.427	4.0582	3.9648	4.2082
pos_3090	(3xi,6E)-1,7-Diphenyl-6-hepten-3-ol	metab_3083	yes	up	-	pos	87095-76-9	267.174	2.92713	M+H	C19H22O	43.9	-	HMDB0030146	-	-	-	-	-	Phenylpropanoids and polyketides	Diarylheptanoids	Linear diarylheptanoids	43.9	-	-	-	1.5033	1.4841	1.1252	0.001021	0.02221	4.7088	4.6182	4.6396	4.0484	4.132	4.2346
pos_3159	(+)-cis-5,6-Dihydro-5-hydroxy-4-methoxy-6-(2-phenylethyl)-2H-pyran-2-one	metab_3152	yes	up	-	pos	52247-81-1	249.112	3.17693	M+H	C14H16O4	37.2	-	HMDB0029575	-	-	-	-	-	Phenylpropanoids and polyketides	Kavalactones	Not Available	37.2	-	-	-	2.1411	2.12	1.2349	0.02101	0.1094	6.1019	6.1574	5.9539	4.8628	4.4124	5.4723
pos_3173	Acteoside	metab_3166	yes	up	C10501	pos	61276-17-3	669.181	3.2	M+2Na-H	C29H36O15	-	49.8	HMDB0259785;HMDB0034843	-	-	-	-	-	Phenylpropanoids and polyketides	Cinnamic acids and derivatives	Hydroxycinnamic acids and derivatives	-	49.8	-	-	1.8889	1.8628	1.2535	0.008607	0.06886	4.2235	4.2151	4.2867	3.4943	3.0379	3.6205
pos_3177	Oenin	metab_3170	yes	up	C12140	pos	30113-37-2;7228-78-6	493.134	3.22275	M+H	C23H24O12	86	-	HMDB0038010;HMDB0030777;LMPK12010372	-	-	map00942	Metabolism	Biosynthesis of other secondary metabolites	Phenylpropanoids and polyketides	Flavonoids	Flavonoid glycosides	86	-	Anthocyanin biosynthesis	Anthocyanin biosynthesis	1.31	1.2896	1.0862	0.0005395	0.01672	4.8085	4.9234	4.8907	4.4799	4.4609	4.5198
pos_3202	Neobanone	metab_3195	yes	up	-	pos	-	383.112	3.3141	M+H	C21H18O7	34.5	-	LMPK12060036	-	-	-	-	-	-	-	-	34.5	-	-	-	1.7118	1.697	1.2989	0.01579	0.0939	3.2815	3.045	3.1908	2.1831	2.3852	2.7567
pos_3204	Persiconin	metab_3197	yes	up	-	pos	28978-03-2	443.133	3.3141	M+H-2H2O	C23H26O11	-	84	HMDB0037482;LMPK12140586	-	-	-	-	-	Phenylpropanoids and polyketides	Flavonoids	Flavonoid glycosides	-	84	-	-	1.8981	1.8727	1.2586	0.0002638	0.01321	3.9772	3.9305	3.9634	3.0302	3.1462	3.2569
pos_3213	Isopentyl gentiobioside	metab_3206	yes	down	-	pos	178275-89-3	451.159	3.33705	M+K	C17H32O11	-	45.1	HMDB0041512	-	-	-	-	-	Lipids and lipid-like molecules	Fatty Acyls	Fatty acyl glycosides	-	45.1	-	-	1.1852	1.1635	0.9161	0.01546	0.09317	3.9196	3.646	3.7288	4.1599	4.0979	4.0715
pos_3218	Benzylmalic acid	metab_3211	yes	up	-	pos	-	225.076	3.36	M+H	C11H12O5	49.1	-	-	-	-	-	-	-	-	-	-	49.1	-	-	-	1.0447	1.0362	1.067	0.01706	0.09753	4.3302	4.3007	4.3572	4.0155	3.9669	4.1886
pos_3265	4-OH-Retinal	metab_3258	yes	up	-	pos	-	283.206	3.54203	M+H-H2O	C20H28O2	-	48.7	HMDB0012788	-	-	-	-	-	Lipids and lipid-like molecules	Prenol lipids	Retinoids	-	48.7	-	-	1.2695	1.2528	1.0855	0.0004736	0.01573	4.6563	4.6098	4.631	4.2192	4.2532	4.3285
pos_3293	Trans-o-Coumaric acid 2-glucoside	metab_3286	yes	up	C05158	pos	618-67-7	309.097	3.65617	M+H-H2O	C15H18O8	-	87.3	HMDB0033581	-	-	map00940;map01110	Metabolism;Metabolism	Biosynthesis of other secondary metabolites;Global and overview maps	Organic oxygen compounds	Organooxygen compounds	Carbohydrates and carbohydrate conjugates	-	87.3	Phenylpropanoid biosynthesis;Biosynthesis of secondary metabolites	Phenylpropanoid biosynthesis;Biosynthesis of secondary metabolites	2.0759	2.0467	1.4417	0.0004104	0.01507	3.136	3.1597	3.2421	2.1152	2.1276	2.3728
pos_3321	Leukotriene A4	metab_3314	yes	up	C00909	pos	72059-45-1	283.206	3.74668	M+H-2H2O	C20H30O3	-	45.1	HMDB0001337;PW_C001030;LMFA03020023	Lipids	Eicosanoids	map00590;map01100	Metabolism;Metabolism	Lipid metabolism;Global and overview maps	Lipids and lipid-like molecules	Fatty Acyls	Fatty acids and conjugates	-	45.1	Arachidonic acid metabolism;Metabolic pathways	Arachidonic acid metabolism;Metabolic pathways	1.4261	1.4076	1.1029	0.003134	0.03912	5.1883	5.074	5.0049	4.5407	4.5867	4.715
pos_3384	Normethandrolone	metab_3377	yes	up	C14491	pos	514-61-4	289.216	4.11113	M+H	C19H28O2	45.1	-	-	-	-	-	-	-	-	-	-	45.1	-	-	-	1.0682	1.0597	1.0735	0.01978	0.1059	4.2339	4.1766	4.205	3.8052	3.8868	4.0591
pos_3424	7-keto DHEA	metab_3417	yes	up	-	pos	-	303.195	4.38253	M+H	C19H26O3	76.8	-	-	-	-	-	-	-	-	-	-	76.8	-	-	-	1.7127	1.6917	1.1532	0.001921	0.03047	5.1177	4.9844	5.211	4.3368	4.3837	4.5561
pos_3476	Thr Ala Thr Phe	metab_3469	yes	up	-	pos	-	439.215	4.74642	M+H	C20H30N4O7	72.3	-	-	-	-	-	-	-	-	-	-	72.3	-	-	-	1.3217	1.3109	1.1191	0.02462	0.1187	4.4642	4.0723	4.2079	3.6845	3.823	3.8803
pos_3486	12(S)-HPETE	metab_3479	yes	up	C05965	pos	67675-13-2;71774-10-2	359.219	4.81433	M+Na	C20H32O4	-	48.1	HMDB0004243;PW_C002105	-	-	map00590;map01100	Metabolism;Metabolism	Lipid metabolism;Global and overview maps	Lipids and lipid-like molecules	Fatty Acyls	Eicosanoids	-	48.1	Arachidonic acid metabolism;Metabolic pathways	Arachidonic acid metabolism;Metabolic pathways	2.9012	2.8629	1.6836	0.003186	0.03939	5.0228	4.8233	4.6507	2.67	2.4971	3.4427
pos_3691	(4Z,7Z,11E,13Z,16Z,19Z)-10-Hydroperoxydocosahexaenoic acid	metab_3684	yes	up	-	pos	121694-98-2	343.225	6.1889	M+H-H2O	C22H32O4	-	39.6	HMDB0062277	-	-	-	-	-	Lipids and lipid-like molecules	Fatty Acyls	Fatty acids and conjugates	-	39.6	-	-	2.3254	2.3096	1.5179	0.03591	0.1458	4.9896	3.6092	4.1167	2.5537	2.5661	3.2565
pos_3883	Ciprostene	metab_3876	yes	down	-	pos	-	365.268	7.2911	M+H	C22H36O4	62.9	-	HMDB0250270	-	-	-	-	-	Lipids and lipid-like molecules	Fatty Acyls	Eicosanoids	62.9	-	-	-	1.8353	1.8151	0.8383	7.439e-05	0.007236	3.8825	3.9808	3.8978	4.6094	4.7063	4.7114
pos_3907	3-Caren-5-one	metab_3900	yes	down	-	pos	81800-50-2	151.112	7.39763	M+H	C10H14O	52.2	-	HMDB0035591	-	-	-	-	-	Lipids and lipid-like molecules	Prenol lipids	Monoterpenoids	52.2	-	-	-	1.1088	1.0913	0.9285	0.0102	0.07446	3.9076	3.8313	3.8245	4.1088	4.2679	4.0768
pos_4062	1-Monopalmitin	metab_4055	yes	down	-	pos	32899-41-5	331.284	8.24047	M+H	C19H38O4	98	-	HMDB0245964;HMDB0011564	-	-	-	-	-	Lipids and lipid-like molecules	Glycerolipids	Monoradylglycerols	98	-	-	-	1.2379	1.2267	0.9333	0.01233	0.08211	5.2581	5.4018	5.1758	5.5448	5.7321	5.6905
pos_4873	DG(16:0/18:2(9Z,12Z)/0:0)	metab_4866	yes	up	C00165	pos	51621-26-2	575.503	11.0501	M+H-H2O	C37H68O5	-	59	PW_C003154;HMDB0007103	-	-	-	-	-	Lipids and lipid-like molecules	Fatty Acyls	Lineolic acids and derivatives	-	59	-	-	1.0009	0.9855	1.044	0.02666	0.1241	6.0983	6.122	6.0082	5.8768	5.6874	5.895
pos_4881	PC(16:0/18:1(11Z))	metab_4874	yes	up	C00157	pos	-	760.584	10.7684	M+H	C42H82NO8P	-	71.4	PW_C004020;LMGP01010576;HMDB0007971	Lipids	Phospholipids	map01100;map00564;map01110;map00590;map00591;map00592	Metabolism;Metabolism;Metabolism;Metabolism;Metabolism;Metabolism	Global and overview maps;Lipid metabolism;Global and overview maps;Lipid metabolism;Lipid metabolism;Lipid metabolism	Lipids and lipid-like molecules	Glycerophospholipids	Glycerophosphocholines	-	71.4	Metabolic pathways;Glycerophospholipid metabolism;Biosynthesis of secondary metabolites;Arachidonic acid metabolism;Linoleic acid metabolism;alpha-Linolenic acid metabolism	Metabolic pathways;Glycerophospholipid metabolism;Biosynthesis of secondary metabolites;Arachidonic acid metabolism;Linoleic acid metabolism;alpha-Linolenic acid metabolism	1.1611	1.1492	1.0602	0.04374	0.1621	6.3842	6.4218	6.3177	6.0738	5.7806	6.1846
pos_4938	Cer(d16:2(4E,6E)/20:0(2OH))	metab_4931	yes	up	-	pos	-	580.53	9.92393	M+H	C36H69NO4	90.3	-	LMSP02010089	-	-	-	-	-	-	-	-	90.3	-	-	-	1.7757	1.7477	1.1819	0.002378	0.03413	4.6413	4.7817	4.7473	4.0409	3.8092	4.1376
pos_5056	DG(18:4(6Z,9Z,12Z,15Z)/18:2(9Z,12Z)/0:0)	metab_5049	yes	down	C00165	pos	-	613.482	9.39297	M+H	C39H64O5	74.4	-	PW_C003386;HMDB0007335	-	-	-	-	-	Lipids and lipid-like molecules	Fatty Acyls	Lineolic acids and derivatives	74.4	-	-	-	1.0388	1.0267	0.9501	0.005833	0.05553	4.8683	4.9268	4.8839	5.1572	5.2225	5.0689
pos_5093	PC(18:0/0:0)	metab_5086	yes	down	C04230	pos	19420-57-6	546.353	9.26488	M+Na	C26H54NO7P	95.8	-	LMGP01050026;HMDB0010384	Lipids	Phospholipids	map00564	Metabolism	Lipid metabolism	Lipids and lipid-like molecules	Glycerophospholipids	Glycerophosphocholines	95.8	-	Glycerophospholipid metabolism	Glycerophospholipid metabolism	1.1016	1.0891	0.947	0.01041	0.07504	5.1635	5.3227	5.3681	5.5669	5.6197	5.556
pos_5409	Glycidyl oleate	metab_5402	yes	down	C19426	pos	5431-33-4	339.289	8.32553	M+H	C21H38O3	40.5	-	-	-	-	-	-	-	-	-	-	40.5	-	-	-	1.1401	1.1214	0.9471	0.002229	0.03332	5.3663	5.2853	5.4146	5.6352	5.6951	5.6327
pos_5414	LysoPA(16:0/0:0)	metab_5407	yes	up	C04036	pos	-	393.24	8.30415	M+H-H2O	C19H39O7P	-	39.6	HMDB0007853	-	-	-	-	-	Lipids and lipid-like molecules	Glycerophospholipids	Glycerophosphates	-	39.6	-	-	1.6314	1.6109	1.1257	0.0003609	0.0141	5.4789	5.3615	5.3619	4.7364	4.7943	4.8641
pos_5422	Propanoyl phosphate	metab_5415	yes	up	C02876	pos	-	155.01	8.30415	M+H	C3H7O5P	44.9	-	-	-	-	map01100;map00660;map00640	Metabolism;Metabolism;Metabolism	Global and overview maps;Carbohydrate metabolism;Carbohydrate metabolism	-	-	-	44.9	-	Metabolic pathways;C5-Branched dibasic acid metabolism;Propanoate metabolism	Metabolic pathways;C5-Branched dibasic acid metabolism;Propanoate metabolism	1.1529	1.1403	1.0901	0.00912	0.07075	4.0276	3.8338	3.863	3.5997	3.5241	3.6322
pos_5511	Ascorbyl stearate	metab_5504	yes	up	-	pos	10605-09-1	460.327	7.98507	M+NH4	C24H42O7	-	34.2	HMDB0038242;LMFA07010789	-	-	-	-	-	Lipids and lipid-like molecules	Fatty Acyls	Fatty acid esters	-	34.2	-	-	1.478	1.4538	1.1836	0.03072	0.1341	3.781	3.8383	3.3443	3.0423	2.9884	3.2347
pos_5567	Pregnanetriol	metab_5560	yes	down	-	pos	27178-64-9	337.273	7.81157	M+H	C21H36O3	-	54.1	HMDB0256756;HMDB0006070	-	-	-	-	-	Lipids and lipid-like molecules	Steroids and steroid derivatives	Pregnane steroids	-	54.1	-	-	1.0277	1.0167	0.9563	0.00425	0.04564	5.3805	5.3618	5.4583	5.5879	5.6685	5.686
pos_6214	8,13-dihydroxy-9,11-octadecadienoic acid	metab_6207	yes	down	-	pos	-	313.237	5.76187	M+H	C18H32O4	83.7	-	LMFA02000166	-	-	-	-	-	-	-	-	83.7	-	-	-	1.4162	1.4017	0.9009	0.01817	0.1012	4.5834	4.5739	4.5102	5.0552	5.2794	4.8365
pos_6245	(2Z,6E)-3,7,11,15,19-Pentamethyl-2,6-eicosadien-1-ol	metab_6238	yes	down	-	pos	26549-03-1	387.358	5.65583	M+Na	C25H48O	-	34.4	HMDB0035154	-	-	-	-	-	Lipids and lipid-like molecules	Prenol lipids	Sesterterpenoids	-	34.4	-	-	2.1454	2.1022	0.7187	0.03475	0.1438	3.3912	2.3002	3.4777	4.2841	4.2862	4.1851
pos_6421	3b,5a,6b-Cholestanetriol	metab_6413	yes	down	-	pos	1253-84-5	385.342	5.07925	M+H-2H2O	C27H48O3	-	45.2	HMDB0003990	-	-	-	-	-	Lipids and lipid-like molecules	Glycerophospholipids	Glycerophosphoethanolamines	-	45.2	-	-	2.2173	2.1831	0.7158	0.01029	0.07465	3.385	2.5201	3.0201	4.0404	4.1678	4.2603
pos_6503	Dihydroactinidiolide	metab_6494	yes	up	-	pos	15356-74-8	181.122	4.81433	M+H	C11H16O2	82.1	-	HMDB0035240	-	-	-	-	-	Organoheterocyclic compounds	Benzofurans	Not Available	82.1	-	-	-	1.2639	1.2485	1.087	0.0001732	0.01112	4.4585	4.5017	4.454	4.0808	4.1543	4.1035
pos_6577	Ax-4''-Hydroxy-3-'-methoxymaysin	metab_6568	yes	up	-	pos	169132-06-3	557.165	4.47343	M+H-2H2O	C28H32O14	-	62.3	HMDB0030238	-	-	-	-	-	Phenylpropanoids and polyketides	Flavonoids	Flavonoid glycosides	-	62.3	-	-	1.6863	1.6596	1.161	0.02649	0.1236	5.2313	5.4083	5.0618	4.644	4.1389	4.7401
pos_6578	Methyl 3,4-dicaffeoylquinate	metab_6569	yes	up	-	pos	345642-66-2	527.155	4.47343	M+H-H2O	C27H28O12	-	45.6	HMDB0037093	-	-	-	-	-	Organic oxygen compounds	Organooxygen compounds	Alcohols and polyols	-	45.6	-	-	1.5218	1.5034	1.1811	0.0019	0.0304	3.3911	3.4619	3.5918	3.0358	2.8992	2.91
pos_6579	Prehumulinic acid	metab_6570	yes	up	-	pos	-	322.202	4.47343	M+ACN+H	C16H24O4	-	41.8	HMDB0030148	-	-	-	-	-	Organic acids and derivatives	Vinylogous acids	Not Available	-	41.8	-	-	1.7816	1.7602	1.2783	0.001113	0.02307	3.3764	3.2177	3.4384	2.52	2.6102	2.7173
pos_6599	Delta-12-Prostaglandin J2	metab_6590	yes	up	C05958	pos	87893-54-7	357.203	4.40528	M+Na	C20H30O4	-	34.7	PW_C002100;LMFA03010020;HMDB0004238	-	-	map00590;map01100	Metabolism;Metabolism	Lipid metabolism;Global and overview maps	Lipids and lipid-like molecules	Fatty Acyls	Eicosanoids	-	34.7	Arachidonic acid metabolism;Metabolic pathways	Arachidonic acid metabolism;Metabolic pathways	1.8362	1.8171	1.19	0.007876	0.06536	5.1921	4.983	5.0821	4.0963	4.1477	4.5792
pos_6602	Malvidin	metab_6593	yes	up	C08716	pos	643-84-5	331.081	4.40528	M+H	C17H14O7	76	-	LMPK12010004	-	-	-	-	-	-	-	-	76	-	-	-	1.2772	1.2786	1.0991	0.02089	0.1091	4.4295	4.5995	4.646	4.126	4.3117	4.0029
pos_6680	13-Nor-6-eremophilene-8,11-dione	metab_6671	yes	up	-	pos	348119-85-7	238.18	4.13398	M+NH4	C14H20O2	-	37.4	HMDB0037606	-	-	-	-	-	Lipids and lipid-like molecules	Prenol lipids	Sesquiterpenoids	-	37.4	-	-	1.0914	1.081	1.0714	0.001687	0.0287	4.1688	4.1104	4.0998	3.8045	3.9064	3.8429
pos_6689	Dorsteniol	metab_6680	yes	up	-	pos	80794-85-0	263.091	4.11113	M+H	C14H14O5	36.2	-	HMDB0032838	-	-	-	-	-	Phenylpropanoids and polyketides	Coumarins and derivatives	Furanocoumarins	36.2	-	-	-	2.4915	2.455	1.5031	0.0003123	0.01396	4.1928	4.256	4.0908	2.6845	2.6586	3.0013
pos_6699	Xi-3-(4-Isopropylphenyl)-2-methylpropanal	metab_6690	yes	up	-	pos	-	191.143	4.08833	M+H	C13H18O	57.2	-	HMDB0037763	-	-	-	-	-	Lipids and lipid-like molecules	Prenol lipids	Monoterpenoids	57.2	-	-	-	1.1631	1.1535	1.0816	0.003972	0.04385	4.326	4.1714	4.191	3.8781	3.9536	3.8989
pos_6736	15(R)-PGE1	metab_6727	yes	up	-	pos	-	337.237	3.95185	M+H-H2O	C20H34O5	72.9	-	-	-	-	-	-	-	-	-	-	72.9	-	-	-	1.8834	1.8588	1.1932	0.001118	0.02311	5.1657	4.9948	4.9015	4.1382	4.1619	4.325
pos_6749	Valechlorin	metab_6740	yes	up	-	pos	51771-49-4	491.207	3.9063	M+CH3OH+H	C22H31ClO8	-	60.4	HMDB0041045	-	-	-	-	-	Lipids and lipid-like molecules	Prenol lipids	Monoterpenoids	-	60.4	-	-	1.567	1.5432	1.1532	0.02376	0.1169	4.9012	4.8085	4.4009	4.1312	3.9111	4.1935
pos_6771	8-hydroxy-13,17-octadecadiene-9,11-diynoic acid	metab_6762	yes	up	-	pos	-	289.18	3.83782	M+H	C18H24O3	60.8	-	LMFA02000186	-	-	-	-	-	-	-	-	60.8	-	-	-	1.0958	1.0791	1.0647	0.01659	0.09623	4.8607	4.96	4.898	4.4693	4.6803	4.6745
pos_6772	Acetoxy-6-gingerol	metab_6763	yes	up	-	pos	-	337.201	3.83782	M+H	C19H28O5	33	-	-	-	-	-	-	-	-	-	-	33	-	-	-	1.5902	1.5698	1.1422	0.002282	0.03373	4.7083	4.6496	4.764	3.9892	4.1143	4.2591
pos_6813	5-Megastigmen-7-yne-3,9-diol 3-glucoside	metab_6804	yes	up	-	pos	62512-27-0	335.185	3.74668	M+H-2H2O	C19H30O7	-	40.3	HMDB0032842	-	-	-	-	-	Organic oxygen compounds	Organooxygen compounds	Carbohydrates and carbohydrate conjugates	-	40.3	-	-	1.1949	1.1858	1.0901	0.02377	0.1169	4.394	4.3733	4.4741	3.9076	4.0018	4.2373
pos_6825	(+/-)-Naringenin	metab_6815	yes	up	-	pos	-	273.076	3.72447	M+H	C15H12O5	84.4	-	-	-	-	-	-	-	-	-	-	84.4	-	-	-	2.8755	2.8412	1.9512	7.017e-05	0.007189	4.0119	3.7417	3.6504	1.9321	1.9444	1.9667
pos_6832	N-(p-Hydroxyphenyl)ethyl p-hydroxycinnamide	metab_6822	yes	up	-	pos	36417-86-4	284.128	3.7017	M+H	C17H17NO3	44.1	-	HMDB0039521	-	-	-	-	-	Phenylpropanoids and polyketides	Cinnamic acids and derivatives	Hydroxycinnamic acids and derivatives	44.1	-	-	-	1.3634	1.3683	1.1381	0.01277	0.08425	3.7675	3.814	3.6928	3.3011	3.4765	3.129
pos_6903	Leukotriene D5	metab_6892	yes	up	-	pos	-	495.253	3.54203	M+H	C25H38N2O6S	-	54.7	LMFA03020073;HMDB0012994	-	-	-	-	-	Lipids and lipid-like molecules	Fatty Acyls	Eicosanoids	-	54.7	-	-	1.6012	1.588	1.1941	0.02168	0.1116	4.2	3.8214	4.0835	3.1277	3.3985	3.612
pos_6907	PGH2	metab_6896	yes	up	C00427	pos	42935-17-1	335.221	3.54203	M+H-H2O	C20H32O5	71.7	-	HMDB0001381;LMFA03010010	Lipids	Eicosanoids	map01100;map00590	Metabolism;Metabolism	Global and overview maps;Lipid metabolism	Lipids and lipid-like molecules	Fatty Acyls	Eicosanoids	71.7	-	Metabolic pathways;Arachidonic acid metabolism	Metabolic pathways;Arachidonic acid metabolism	1.6334	1.6131	1.1264	0.0006848	0.0187	5.4835	5.3602	5.4131	4.7152	4.8193	4.8985
pos_6931	Taraxacoside	metab_6920	yes	up	-	pos	98449-40-2	381.118	3.49672	M+H-H2O	C18H22O10	-	79.8	HMDB0030055	-	-	-	-	-	Organic oxygen compounds	Organooxygen compounds	Carbohydrates and carbohydrate conjugates	-	79.8	-	-	2.0073	1.9772	1.2395	0.003798	0.04302	4.8703	4.8944	4.8594	4.0563	3.6242	4.1194
pos_6991	Isorhamnetin	metab_6979	yes	up	C10084	pos	480-19-3	317.065	3.40565	M+H	C16H12O7	84	-	HMDB0002655;LMPK12110002	-	-	-	-	-	Phenylpropanoids and polyketides	Flavonoids	Flavones	84	-	-	-	1.5719	1.5538	1.1527	4.696e-05	0.00533	4.178	4.1964	4.1238	3.6015	3.6525	3.5878
pos_7005	1'-Acetoxychavicol acetate	metab_6993	yes	up	C10426	pos	151986-17-3;52946-22-2	235.096	3.38282	M+H	C13H14O4	53.6	-	HMDB0041005;HMDB0041006	-	-	-	-	-	Benzenoids	Phenol esters	Not Available	53.6	-	-	-	1.4025	1.3885	1.1568	0.0138	0.08805	3.5745	3.561	3.5781	3.0429	2.9133	3.3055
pos_7029	Phe Gly	metab_7017	yes	down	-	pos	-	223.108	3.33705	M+H	C11H14N2O3	53.1	-	-	-	-	-	-	-	-	-	-	53.1	-	-	-	1.4263	1.4197	0.8037	0.0152	0.09196	2.1961	2.1553	1.8522	2.5156	2.5098	2.6927
pos_7064	Osmanthuside A	metab_7052	yes	up	-	pos	97457-19-7	429.152	3.26842	M+H-H2O	C23H26O9	-	56.6	HMDB0038748	-	-	-	-	-	Phenylpropanoids and polyketides	Cinnamic acids and derivatives	Hydroxycinnamic acids and derivatives	-	56.6	-	-	2.9509	2.9108	1.6016	1.306e-05	0.00291	5.1108	5.1981	5.1858	3.299	3.0862	3.2902
pos_7066	7-Deoxy-13-dihydroadriamycinone	metab_7054	yes	up	-	pos	-	401.123	3.26842	M+H	C21H20O8	42.7	-	HMDB0244417	-	-	-	-	-	Benzenoids	Naphthacenes	Tetracenequinones	42.7	-	-	-	1.7337	1.7104	1.1972	0.0006029	0.0176	4.1868	4.1097	4.1246	3.378	3.4076	3.5873
pos_7067	PGA3	metab_7055	yes	up	-	pos	-	333.205	3.26842	M+H	C20H28O4	80.4	-	LMFA03010140	-	-	-	-	-	-	-	-	80.4	-	-	-	1.3433	1.3269	1.0814	0.001442	0.02637	5.6047	5.4748	5.4947	5.066	5.0841	5.1774
pos_7071	Boviquinone 4	metab_7059	yes	up	-	pos	28129-52-4	207.138	3.26842	M+2H	C26H36O4	-	42.1	HMDB0030057	-	-	-	-	-	Lipids and lipid-like molecules	Prenol lipids	Diterpenoids	-	42.1	-	-	1.1175	1.106	1.0722	0.005243	0.05157	4.4913	4.3844	4.3095	4.1176	4.0932	4.0862
pos_7078	Neoraufuracin	metab_7066	yes	up	-	pos	-	435.165	3.24553	M+H	C22H26O9	52.9	-	LMPK12130057	-	-	-	-	-	-	-	-	52.9	-	-	-	1.4971	1.493	1.1325	0.03983	0.154	5.066	5.0897	5.1759	4.4059	4.2397	4.8934
pos_7084	Patulin	metab_7072	yes	up	C16748	pos	149-29-1	137.023	3.24553	M+H-H2O	C7H6O4	-	53.4	HMDB0034299	-	-	-	-	-	Organoheterocyclic compounds	Pyrans	Not Available	-	53.4	-	-	2.2566	2.2276	1.432	0.0002791	0.0133	3.9361	3.8411	3.6298	2.7	2.5939	2.6703
pos_7107	Gibberellin A44	metab_7095	yes	up	C12308	pos	36434-15-8	347.185	3.2	M+H	C20H26O5	69.6	-	HMDB0036901;LMPR0104170030	-	-	-	-	-	Lipids and lipid-like molecules	Prenol lipids	Diterpenoids	69.6	-	-	-	1.5313	1.5104	1.1226	0.001391	0.02597	4.9393	4.9191	4.9158	4.302	4.338	4.5207
pos_7190	Val Ile Leu	metab_7178	yes	down	-	pos	-	344.254	3.0869	M+H	C17H33N3O4	72.1	-	-	-	-	-	-	-	-	-	-	72.1	-	-	-	1.4211	1.406	0.8496	0.01065	0.07612	2.9358	2.8085	2.576	3.2644	3.2186	3.3092
pos_7270	2,6-Dihydroxynaphthalene	metab_7258	yes	up	-	pos	-	161.06	2.9726	M+H	C10H8O2	55.3	-	-	-	-	-	-	-	-	-	-	55.3	-	-	-	1.4128	1.3933	1.1305	9.858e-05	0.00808	3.8854	3.8666	3.8869	3.4384	3.3811	3.4772
pos_7289	1,2-Disinapoylgentiobiose	metab_7277	yes	up	-	pos	-	777.221	2.92713	M+Na	C34H42O19	-	36.2	HMDB0030335	-	-	-	-	-	Phenylpropanoids and polyketides	Cinnamic acids and derivatives	Hydroxycinnamic acids and derivatives	-	36.2	-	-	1.748	1.7236	1.1402	0.003376	0.04062	5.7883	5.8096	5.7766	5.0596	4.8928	5.2857
pos_7302	3-Hydroxy-1-methylestra-1,3,5(10),6-tetraen-17-one	metab_7290	yes	up	C15308	pos	-	283.169	2.92713	M+H	C19H22O2	40.9	-	-	-	-	-	-	-	-	-	-	40.9	-	-	-	1.5694	1.5504	1.1601	0.003322	0.04018	4.2075	4.1035	4.2324	3.462	3.6008	3.7503
pos_7320	4-Hydroxy-2,3,9-trimethoxypterocarpan	metab_7308	yes	up	-	pos	56841-82-8	331.118	2.90442	M+H	C18H18O6	32.5	-	LMPK12070089;HMDB0033817	-	-	-	-	-	Organic oxygen compounds	Organooxygen compounds	Carbonyl compounds	32.5	-	-	-	1.9024	1.8893	1.308	0.000422	0.01514	3.4879	3.457	3.5003	2.7155	2.7573	2.5144
pos_7322	(R)-Bitalin A	metab_7310	yes	up	-	pos	35844-67-8	219.102	2.90442	M+H	C13H14O3	42.6	-	HMDB0040358	-	-	-	-	-	Benzenoids	Benzene and substituted derivatives	Acetophenones	42.6	-	-	-	1.0382	1.0269	1.0775	0.002892	0.03776	3.556	3.4402	3.51	3.2264	3.2347	3.2881
pos_7368	Phe Ile	metab_7356	yes	down	-	pos	-	279.17	2.83688	M+H	C15H22N2O3	71.4	-	-	-	-	-	-	-	-	-	-	71.4	-	-	-	1.0365	1.0256	0.9097	0.04619	0.1671	3.0676	3.0326	2.7497	3.2749	3.2073	3.2456
pos_7385	7a-Hydroxydehydroepiandrosterone	metab_7373	yes	up	C18045	pos	53-00-9	287.2	2.81553	M+H-H2O	C19H28O3	-	35.6	LMST02020101;HMDB0004611	-	-	-	-	-	Lipids and lipid-like molecules	Steroids and steroid derivatives	Androstane steroids	-	35.6	-	-	1.0522	1.042	1.0664	0.03596	0.1459	4.8655	4.6999	4.6042	4.3537	4.395	4.5385
pos_7386	L-Pyridosine	metab_7374	yes	up	-	pos	31489-08-4	277.118	2.81553	M+Na	C12H18N2O4	-	65.7	HMDB0029443	-	-	-	-	-	Organic acids and derivatives	Carboxylic acids and derivatives	Amino acids, peptides, and analogues	-	65.7	-	-	1.2489	1.2402	1.1178	0.03722	0.1493	3.6612	3.9897	4.0486	3.5307	3.562	3.3751
pos_7389	Dehydrofalcarinol	metab_7377	yes	up	C17716	pos	-	243.174	2.81553	M+H	C17H22O	34.7	-	-	-	-	-	-	-	-	-	-	34.7	-	-	-	1.2029	1.1895	1.0885	0.01226	0.082	4.5024	4.3411	4.2957	3.9581	3.9853	4.1284
pos_7411	Sinapyl alcohol	metab_7399	yes	up	C02325	pos	537-33-7	193.086	2.79292	M+H-H2O	C11H14O4	55.1	-	HMDB0013070	-	-	map01100;map00940;map01110	Metabolism;Metabolism;Metabolism	Global and overview maps;Biosynthesis of other secondary metabolites;Global and overview maps	Benzenoids	Phenols	Methoxyphenols	55.1	-	Metabolic pathways;Phenylpropanoid biosynthesis;Biosynthesis of secondary metabolites	Metabolic pathways;Phenylpropanoid biosynthesis;Biosynthesis of secondary metabolites	1.2024	1.1859	1.0718	0.006315	0.05773	5.1148	5.1479	5.0923	4.7545	4.6777	4.8941
pos_7459	7-Hydroxy-3-(4-methoxyphenyl)-4-propyl-2H-1-benzopyran-2-one	metab_7447	yes	up	C15051	pos	5219-18-1	311.128	2.72525	M+H	C19H18O4	30.7	-	-	-	-	-	-	-	-	-	-	30.7	-	-	-	2.1335	2.1152	1.4397	0.0002211	0.01233	3.3687	3.3796	3.3105	2.4058	2.407	2.1732
pos_7501	Eriodictyol 7-(6-galloylglucoside)	metab_7489	yes	down	-	pos	-	585.124	2.63507	M+H-H2O	C28H26O15	-	49.2	HMDB0039921	-	-	-	-	-	Phenylpropanoids and polyketides	Flavonoids	Flavonoid glycosides	-	49.2	-	-	1.3518	1.3329	0.8295	0.01875	0.1032	2.0864	2.2216	2.376	2.5567	2.8489	2.6536
pos_7527	Malonyldaidzin	metab_7515	yes	down	C16191	pos	124590-31-4	503.116	2.58998	M+H	C24H22O12	42.4	-	HMDB0041263	-	-	-	-	-	Phenylpropanoids and polyketides	Coumarins and derivatives	Furanocoumarins	42.4	-	-	-	2.161	2.1311	0.7163	0.007638	0.06439	3.161	2.8826	2.4156	3.8474	4.0409	3.9222
pos_7577	2-Hydroxyiminodibenzyl glucuronide	metab_7565	yes	down	-	pos	-	388.139	2.5	M+H	C20H21NO7	32.5	-	-	-	-	-	-	-	-	-	-	32.5	-	-	-	3.0233	2.9825	0.55	7.754e-05	0.007236	2.6485	2.5533	2.3017	4.5227	4.674	4.4448
pos_7590	Glu Trp	metab_7578	yes	up	-	pos	-	334.14	2.47772	M+H	C16H19N3O5	61.6	-	-	-	-	-	-	-	-	-	-	61.6	-	-	-	1.0475	1.0358	1.0749	0.02562	0.1212	4.0281	4.0439	4.1126	3.6341	3.8977	3.8053
pos_7610	Kaempferol-3-O-alpha-L-arabinoside	metab_7598	yes	up	-	pos	-	419.097	2.43397	M+H	C20H18O10	97.5	-	-	-	-	-	-	-	-	-	-	97.5	-	-	-	2.2923	2.2703	2.0735	0.02601	0.1222	3.2051	2.4379	2.2265	0.8622	1.1874	1.7451
pos_7614	Val Trp	metab_7602	yes	up	-	pos	-	304.165	2.43397	M+H	C16H21N3O3	73	-	-	-	-	-	-	-	-	-	-	73	-	-	-	1.052	1.0624	1.0889	0.03488	0.1442	3.5586	3.6354	3.5033	3.2572	3.4289	3.1378
pos_7621	N-Deschlorobenzoyl indomethacin	metab_7609	yes	up	-	pos	-	202.086	2.41213	M+H-H2O	C12H13NO3	-	50.7	HMDB0013988	-	-	-	-	-	Organoheterocyclic compounds	Indoles and derivatives	Indolyl carboxylic acids and derivatives	-	50.7	-	-	1.3928	1.3713	1.1121	0.001726	0.02907	4.3815	4.4652	4.4024	3.9332	3.9027	4.0781
pos_7639	Ala Val Leu	metab_7627	yes	down	-	pos	-	302.207	2.3692	M+H	C14H27N3O4	70	-	-	-	-	-	-	-	-	-	-	70	-	-	-	1.6299	1.643	0.7168	0.01518	0.09196	1.6994	1.6872	1.6183	2.1486	2.1863	2.6454
pos_7652	Tyr Pro His	metab_7640	yes	down	-	pos	-	416.192	2.34803	M+H	C20H25N5O5	37.9	-	-	-	-	-	-	-	-	-	-	37.9	-	-	-	2.3406	2.3166	0.6833	0.0004192	0.01514	2.5558	2.8414	2.6415	3.7654	4.0018	3.9978
pos_7665	6-(3-hydroxybut-1-en-1-yl)-7-methoxy-2H-chromen-2-one	metab_7653	yes	up	-	pos	-	556.194	2.32748	2M+ACN+Na	C14H14O4	-	36.2	-	-	-	-	-	-	-	-	-	-	36.2	-	-	2.4882	2.4548	1.5942	4.085e-05	0.004709	3.5689	3.7618	3.7933	2.3107	2.3231	2.3456
pos_7674	Diosmin	metab_7662	yes	up	C10039	pos	520-27-4	609.181	2.30553	M+H	C28H32O15	69.4	-	HMDB0029548	-	-	-	-	-	Phenylpropanoids and polyketides	Flavonoids	Flavonoid glycosides	69.4	-	-	-	1.2738	1.258	1.1576	0.04983	0.1738	3.0433	3.2456	3.4952	2.6513	2.9686	2.832
pos_7683	ETHYL SYRINGATE	metab_7671	yes	up	-	pos	-	227.091	2.30553	M+H	C11H14O5	66.6	-	-	-	-	-	-	-	-	-	-	66.6	-	-	-	1.2096	1.1934	1.0875	0.0003594	0.0141	4.1087	4.0891	4.149	3.7644	3.7581	3.8319
pos_7692	Pro Trp	metab_7680	yes	up	-	pos	-	302.15	2.28422	M+H	C16H19N3O3	56.3	-	-	-	-	-	-	-	-	-	-	56.3	-	-	-	1.2526	1.2505	1.1103	0.007856	0.06536	3.8738	3.8021	3.7098	3.4083	3.5262	3.319
pos_7707	2,3-Butanediol glucoside	metab_7695	yes	down	-	pos	146763-54-4	217.107	2.26277	M+H-2H2O	C10H20O7	-	82.2	HMDB0040822	-	-	-	-	-	Organic oxygen compounds	Organooxygen compounds	Carbohydrates and carbohydrate conjugates	-	82.2	-	-	1.4915	1.4722	0.8863	0.004153	0.04492	4.0661	4.0946	4.0511	4.6108	4.7347	4.4325
pos_7724	NESS 0327	metab_7712	yes	up	-	pos	-	489.1	2.21967	M+H	C24H23Cl3N4O	34.9	-	-	-	-	-	-	-	-	-	-	34.9	-	-	-	3.0239	3.0058	4.407	0.03997	0.154	4.0012	3.1257	2.3718	0.0511	0.0525	2.0517
pos_7732	3R-aminononanoic acid	metab_7720	yes	down	-	pos	-	174.149	2.21967	M+H	C9H19NO2	58	-	LMFA01100019	-	-	-	-	-	-	-	-	58	-	-	-	1.8881	1.8589	0.8027	0.002476	0.03472	3.5096	3.2874	3.2627	4.2904	4.2474	3.993
pos_7764	Graveobioside B	metab_7752	yes	up	-	pos	33579-63-4	595.166	2.13353	M+H	C27H30O15	30.5	-	HMDB0037454	-	-	-	-	-	Phenylpropanoids and polyketides	Flavonoids	Flavonoid glycosides	30.5	-	-	-	1.3482	1.3359	1.0901	0.001248	0.02429	5.0058	5.0716	4.9918	4.5712	4.6966	4.5546
pos_7770	Quercetin 3-(3-p-coumaroylglucoside)	metab_7758	yes	up	-	pos	76211-70-6	593.129	2.11117	M+H-H2O	C30H26O14	-	65.2	HMDB0037365	-	-	-	-	-	Phenylpropanoids and polyketides	Flavonoids	Flavonoid glycosides	-	65.2	-	-	3.9503	3.9017	3.4387	1.029e-05	0.002531	5.1291	4.899	4.6935	1.4119	1.4239	1.4456
pos_7782	Val Val Val	metab_7770	yes	down	-	pos	-	316.223	2.08933	M+H	C15H29N3O4	55.7	-	-	-	-	-	-	-	-	-	-	55.7	-	-	-	1.3573	1.3439	0.8209	0.00524	0.05157	2.0292	2.0169	1.9471	2.5588	2.3004	2.4438
pos_7783	Cyanidin	metab_7771	yes	up	C05905	pos	13306-05-3;528-58-5	287.055	2.08933	M+H	C15H10O6	84.5	-	LMPK12010002;HMDB0244184;HMDB0002708	-	-	map01100;map00942;map00941;map01110	Metabolism;Metabolism;Metabolism;Metabolism	Global and overview maps;Biosynthesis of other secondary metabolites;Biosynthesis of other secondary metabolites;Global and overview maps	Organoheterocyclic compounds	Triazines	1,3,5-triazines	84.5	-	Metabolic pathways;Anthocyanin biosynthesis;Flavonoid biosynthesis;Biosynthesis of secondary metabolites	Metabolic pathways;Anthocyanin biosynthesis;Flavonoid biosynthesis;Biosynthesis of secondary metabolites	1.7945	1.7839	1.2106	0.03206	0.1381	5.3395	4.7697	4.4954	4.1753	4.003	3.8845
pos_7806	N17-Dimethylindole-3-carboxaldehyde	metab_7793	yes	up	-	pos	-	174.091	2.04663	M+H	C11H11NO	44.5	-	-	-	-	-	-	-	-	-	-	44.5	-	-	-	1.992	1.9624	1.3752	0.00944	0.0723	3.4765	3.5055	3.5308	2.8925	2.1872	2.5631
pos_7808	Cadabicine methyl ether	metab_7795	yes	up	-	pos	-	472.218	2.025	M+Na	C26H31N3O4	-	65.5	HMDB0039857	-	-	-	-	-	Phenylpropanoids and polyketides	Flavonoids	Flavonoid glycosides	-	65.5	-	-	2.4733	2.4711	1.5836	0.04803	0.1701	4.4136	4.5548	4.5854	2.1669	2.3665	4.0251
pos_7809	Taraxinic acid glucosyl ester	metab_7796	yes	up	-	pos	75911-14-7	442.207	2.025	M+NH4	C21H28O9	-	43	HMDB0035249	-	-	-	-	-	Lipids and lipid-like molecules	Prenol lipids	Terpene lactones	-	43	-	-	1.1392	1.1244	1.0757	0.01673	0.09629	4.4993	4.5924	4.626	4.2406	4.1317	4.3803
pos_7837	Asp Trp Phe	metab_7824	yes	down	-	pos	-	467.189	1.96328	M+H	C24H26N4O6	36.9	-	-	-	-	-	-	-	-	-	-	36.9	-	-	-	1.2786	1.2699	0.9079	0.03504	0.1446	4.1538	4.4657	4.219	4.686	4.9016	4.5549
pos_7877	3-Methylindole	metab_7863	yes	up	C08313	pos	83-34-1	132.081	1.92117	M+H	C9H9N	63.2	-	HMDB0000466	-	-	map00380	Metabolism	Amino acid metabolism	Organoheterocyclic compounds	Indoles and derivatives	Indoles	63.2	-	Tryptophan metabolism	Tryptophan metabolism	1.5423	1.521	1.1434	0.0006468	0.01821	4.2513	4.3549	4.3076	3.6726	3.8269	3.7967
pos_7943	Cinncassiol C	metab_7929	yes	down	-	pos	73613-35-1	345.171	1.83447	M+H-2H2O	C20H28O7	-	51.5	HMDB0035166	-	-	-	-	-	Organic oxygen compounds	Organooxygen compounds	Carbohydrates and carbohydrate conjugates	-	51.5	-	-	2.6405	2.6136	0.6421	0.00442	0.04682	3.3275	2.9381	2.5401	4.2552	4.632	4.827
pos_8033	2-Keto-glutaramic acid	metab_8018	yes	down	C00940	pos	18465-19-5	308.106	1.72755	2M+NH4	C5H7NO4	-	68	HMDB0001552	-	-	map01100;map00250	Metabolism;Metabolism	Global and overview maps;Amino acid metabolism	Organic acids and derivatives	Keto acids and derivatives	Short-chain keto acids and derivatives	-	68	Metabolic pathways;Alanine, aspartate and glutamate metabolism	Metabolic pathways;Alanine, aspartate and glutamate metabolism	2.9119	2.8725	0.5817	0.0003228	0.01409	2.7286	2.3498	2.8741	4.4507	4.5958	4.6251
pos_8065	Cys Phe Glu	metab_8050	yes	down	-	pos	-	398.141	1.68488	M+H	C17H23N3O6S	44.4	-	-	-	-	-	-	-	-	-	-	44.4	-	-	-	1.2124	1.1934	0.9128	0.02514	0.1199	3.9464	3.8348	3.9591	4.1002	4.44	4.3215
pos_8090	Glu Met	metab_8075	yes	down	-	pos	-	279.101	1.66558	M+H	C10H18N2O5S	44.6	-	-	-	-	-	-	-	-	-	-	44.6	-	-	-	2.1717	2.147	0.5751	0.009764	0.07318	1.6473	1.8602	1.155	2.9602	2.6295	2.5167
pos_8091	Val Pro Gly	metab_8076	yes	down	-	pos	-	272.16	1.66558	M+H	C12H21N3O4	62.7	-	-	-	-	-	-	-	-	-	-	62.7	-	-	-	1.5472	1.5234	0.8512	0.006363	0.05788	3.4166	3.2277	3.1004	3.7253	3.9224	3.799
pos_8097	3-Hydroxymonoethylglycinexylidide	metab_8082	yes	down	C16572	pos	34604-56-3	187.124	1.66558	M+H-2H2O	C12H18N2O2	-	46.9	HMDB0060678;PW_C040577	-	-	-	-	-	Organic acids and derivatives	Carboxylic acids and derivatives	Amino acids, peptides, and analogues	-	46.9	-	-	2.1572	2.1313	0.7867	4.1e-06	0.001355	3.8184	3.7786	3.8556	4.8339	4.8326	4.8929
pos_8101	Ne,Ne dimethyllysine	metab_8086	yes	up	C05545	pos	-	157.134	1.66558	M+H-H2O	C8H18N2O2	-	30.6	HMDB0013287	-	-	map01100;map00310	Metabolism;Metabolism	Global and overview maps;Amino acid metabolism	Organic acids and derivatives	Carboxylic acids and derivatives	Amino acids, peptides, and analogues	-	30.6	Metabolic pathways;Lysine degradation	Metabolic pathways;Lysine degradation	1.9046	1.8832	1.2903	0.0009251	0.02126	3.5668	3.6245	3.8372	2.9384	2.8223	2.7867
pos_8127	Zidovudine	metab_8112	yes	up	C07210	pos	30516-87-1	250.093	1.64665	M+H-H2O	C10H13N5O4	-	64.9	PW_C008998;HMDB0014638;HMDB0246088	-	-	-	-	-	Nucleosides, nucleotides, and analogues	Pyrimidine nucleosides	Pyrimidine 2'',3''-dideoxyribonucleosides	-	64.9	-	-	1.4923	1.4775	1.1742	0.01048	0.0753	3.5678	3.8026	3.5274	3.0061	3.2577	3.0195
pos_8130	2-(4-Methyl-5-thiazolyl)ethyl formate	metab_8115	yes	down	-	pos	90731-56-9	213.069	1.64665	M+ACN+H	C7H9NO2S	-	43.7	HMDB0032420	-	-	-	-	-	Organoheterocyclic compounds	Azoles	Thiazoles	-	43.7	-	-	2.1023	2.1088	0.7402	0.01441	0.08998	3.2588	2.9148	3.1161	3.879	4.0077	4.6639
pos_8172	5-Acetyl-2,3-dihydro-1H-pyrrolizine	metab_8157	yes	down	-	pos	55041-85-5	150.091	1.604	M+H	C9H11NO	-	30.5	HMDB0040051	-	-	-	-	-	Organoheterocyclic compounds	Pyrrolizines	Not Available	-	30.5	-	-	2.4272	2.4	0.7213	5.096e-05	0.005611	3.3527	3.5553	3.3396	4.7045	4.7509	4.7535
pos_8220	Piperidine	metab_8205	yes	down	C01746	pos	110-89-4	86.097	1.54082	M+H	C5H11N	51.3	-	HMDB0034301	-	-	map00960	Metabolism	Biosynthesis of other secondary metabolites	Organoheterocyclic compounds	Piperidines	Not Available	51.3	-	Tropane, piperidine and pyridine alkaloid biosynthesis	Tropane, piperidine and pyridine alkaloid biosynthesis	1.1761	1.1733	0.938	0.003556	0.04122	4.9237	4.9225	4.8655	5.1678	5.1901	5.3248
pos_8233	5'-Deoxyadenosine	metab_8218	yes	up	C05198	pos	4754-39-6	252.109	1.48015	M+H	C10H13N5O3	93.4	-	HMDB0001983	-	-	-	-	-	Nucleosides, nucleotides, and analogues	5''-deoxyribonucleosides	Not Available	93.4	-	-	-	1.4997	1.4898	1.1478	0.01159	0.07908	4.5304	4.1971	4.1588	3.7025	3.8269	3.6975
pos_8315	Ptelatoside B	metab_8300	yes	up	-	pos	90852-99-6	470.198	1.3769	M+ACN+H	C20H28O10	-	71.6	HMDB0034447	-	-	-	-	-	Organic oxygen compounds	Organooxygen compounds	Carbohydrates and carbohydrate conjugates	-	71.6	-	-	1.1165	1.105	1.0634	0.02078	0.1089	5.236	5.3026	5.2186	4.8578	4.8584	5.1003
pos_8355	1-(3-Methylbutanoyl)-6-apiosylglucose	metab_8340	yes	down	-	pos	467242-31-5	438.197	1.18488	M+ACN+H	C16H28O11	-	40.7	HMDB0039953	-	-	-	-	-	Lipids and lipid-like molecules	Fatty Acyls	Fatty acyl glycosides	-	40.7	-	-	4.4091	4.3527	0.0488	2.073e-05	0.003399	0.5837	0.0452	0.0387	4.6046	4.4551	4.6054
pos_8474	Tranexamic Acid	metab_8458	yes	up	C12535	pos	1197-18-8	190.144	0.939317	M+CH3OH+H	C8H15NO2	-	33.5	PW_C008836;HMDB0014447	-	-	-	-	-	Organic acids and derivatives	Carboxylic acids and derivatives	Amino acids, peptides, and analogues	-	33.5	-	-	1.0811	1.0672	1.0683	0.01286	0.08452	4.5162	4.5048	4.4494	4.0815	4.2302	4.2976
pos_8503	Diacetone alcohol	metab_8487	yes	down	-	pos	123-42-2	134.118	0.900083	M+NH4	C6H12O2	-	31.6	HMDB0031511	-	-	-	-	-	Organic oxygen compounds	Organooxygen compounds	Carbonyl compounds	-	31.6	-	-	3.6427	3.5916	0.3797	0.0005354	0.01666	1.8724	1.8601	1.7907	5.2563	5.0143	4.2729
pos_8574	4-Hydroxybenzaldehyde	metab_8558	yes	up	C00633	pos	123-08-0	123.044	0.70585	M+H	C7H6O2	88.2	-	HMDB0011718	-	-	map01100	Metabolism	Global and overview maps	Organic oxygen compounds	Organooxygen compounds	Carbonyl compounds	88.2	-	Metabolic pathways	Metabolic pathways	1.4872	1.4676	1.1082	0.001676	0.02869	5.2591	5.2432	5.1334	4.5932	4.765	4.7503
pos_8679	Oxolan-3-one	metab_8663	yes	down	-	pos	22929-52-8	87.0446	0.6338	M+H	C4H6O2	35.3	-	HMDB0002523	-	-	-	-	-	Organoheterocyclic compounds	Dihydrofurans	Furanones	35.3	-	-	-	1.7773	1.7532	0.8687	0.0007845	0.01941	4.8556	4.7907	4.6084	5.4941	5.4979	5.4187
pos_8766	L-2-Amino-5-(methylthio)pentanoic acid	metab_8749	yes	down	C17213	pos	25148-30-5	164.074	0.556333	M+H	C6H13NO2S	-	53.2	HMDB0030406	-	-	map01210;map01110;map00966	Metabolism;Metabolism;Metabolism	Global and overview maps;Global and overview maps;Biosynthesis of other secondary metabolites	Organic acids and derivatives	Carboxylic acids and derivatives	Amino acids, peptides, and analogues	-	53.2	2-Oxocarboxylic acid metabolism;Biosynthesis of secondary metabolites;Glucosinolate biosynthesis	2-Oxocarboxylic acid metabolism;Biosynthesis of secondary metabolites;Glucosinolate biosynthesis	3.2636	3.23	0.2543	0.0006037	0.0176	0.8351	1.2315	0.4147	3.3508	3.1082	3.2981
pos_8785	1,4,5,8-TETRAHYDROXY-2,6-DIMETHYLANTHROQUINONE	metab_8768	yes	down	-	pos	-	301.073	0.5364	M+H	C16H12O6	66.5	-	-	-	-	-	-	-	-	-	-	66.5	-	-	-	1.592	1.5713	0.8087	0.01154	0.07888	2.5303	2.5652	2.7288	3.2227	3.4441	3.009
pos_6876	11beta-hydroxyandrost-4-ene-3,17-dione	metab_8990	yes	up	C05284	pos	382-44-5	303.195	3.61055	M+H	C19H26O3	42.4	-	LMST02020066;HMDB0006773	-	-	-	-	-	Organoheterocyclic compounds	Oxazinanes	Morpholines	42.4	-	-	-	1.6085	1.5869	1.1394	0.001225	0.02405	4.8651	4.8252	4.8474	4.1531	4.2143	4.3921
pos_8003	Caffeic acid	metab_8992	yes	up	C01197	pos	501-16-6;4361-87-9;331-39-5	163.039	1.76857	M+H-H2O	C9H8O4	78	-	HMDB0003501;HMDB0001964	-	-	map01100;map00940;map01110	Metabolism;Metabolism;Metabolism	Global and overview maps;Biosynthesis of other secondary metabolites;Global and overview maps	Phenylpropanoids and polyketides	Cinnamic acids and derivatives	Hydroxycinnamic acids and derivatives	78	-	Metabolic pathways;Phenylpropanoid biosynthesis;Biosynthesis of secondary metabolites	Metabolic pathways;Phenylpropanoid biosynthesis;Biosynthesis of secondary metabolites	1.4117	1.3869	1.1356	0.02827	0.1276	4.1419	4.4964	4.1706	3.7069	3.6193	3.9542
pos_7793	Epicatechin	metab_8996	yes	up	C09727;C06562	pos	490-46-0;154-23-4	291.086	2.0689	M+H	C15H14O6	83.2	-	HMDB0001871;LMPK12020003;HMDB0002780	-	-	map01100;map00941;map01110	Metabolism;Metabolism;Metabolism	Global and overview maps;Biosynthesis of other secondary metabolites;Global and overview maps	Phenylpropanoids and polyketides	Flavonoids	Flavans	83.2	-	Metabolic pathways;Flavonoid biosynthesis;Biosynthesis of secondary metabolites	Metabolic pathways;Flavonoid biosynthesis;Biosynthesis of secondary metabolites	3.4335	3.3971	2.2729	0.0001812	0.01138	5.0465	4.674	4.498	1.9522	2.3145	1.9868
pos_393	Estradiol	metab_8997	yes	up	C00951	pos	50-28-2	305.211	3.13162	M+Na, M+CH3OH+H, M+H-H2O	C18H24O2	-	66.2	HMDB0303648;PW_C000098;HMDB0000151;MJDBOTE0000772	Steroids;Hormones and transmitters	18-Carbon atoms;Steroid hormones	map01100	Metabolism	Global and overview maps	Lipids and lipid-like molecules	Steroids and steroid derivatives	Steroid esters	-	66.2	Metabolic pathways	Metabolic pathways	1.5357	1.5132	1.1	0.0005423	0.01674	5.8549	5.936	5.7976	5.2626	5.3501	5.3761
pos_1159	Gibberellin A15	metab_8998	yes	up	C14162	pos	-	331.19	2.81553	M+H-H2O, M+H	C20H26O4	55.2	-	LMPR0104170017;HMDB0303456	-	-	-	-	-	Lipids and lipid-like molecules	Prenol lipids	Diterpenoids	55.2	-	-	-	1.0775	1.0658	1.0641	0.02858	0.1284	5.159	4.9857	4.8926	4.6549	4.6763	4.7998
neg_8	2-Hydroxydecanedioic acid	metab_9013	yes	up	-	neg	103963-71-9	217.108	3.39918	M-H, 2M+Hac-H, M+Na-2H, M-H2O-H	C10H18O5	-	47.9	HMDB0000424	-	-	-	-	-	Organic acids and derivatives	Hydroxy acids and derivatives	Medium-chain hydroxy acids and derivatives	-	47.9	-	-	1.0047	1.0007	1.0723	0.01796	0.0707	4.6155	4.5052	4.4945	4.1446	4.1833	4.3683
neg_11	Glucodistylin	metab_9016	yes	up	-	neg	27297-45-6	465.104	2.06765	M-H, 2M-H, M+Cl, M-H2O-H	C21H22O12	-	66.3	HMDB0041597	-	-	-	-	-	Phenylpropanoids and polyketides	Flavonoids	Flavonoid glycosides	-	66.3	-	-	1.4785	1.4718	1.1372	0.01758	0.0703	5.7932	5.4451	5.248	4.9398	4.8226	4.7323
neg_39	D-Gluconic acid	metab_9043	yes	down	C00257	neg	526-95-4	195.05	0.64105	M-H, M+Na-2H, M-H2O-H	C6H12O7	70.3	-	HMDB0000625;HMDB0303730	Carbohydrates	Monosaccharides	map01100;map00030;map01110;map01200	Metabolism;Metabolism;Metabolism;Metabolism	Global and overview maps;Carbohydrate metabolism;Global and overview maps;Global and overview maps	Organic oxygen compounds	Organooxygen compounds	Carbohydrates and carbohydrate conjugates	70.3	-	Metabolic pathways;Pentose phosphate pathway;Biosynthesis of secondary metabolites;Carbon metabolism	Metabolic pathways;Pentose phosphate pathway;Biosynthesis of secondary metabolites;Carbon metabolism	1.3926	1.3805	0.9059	0.007082	0.0437	5.5262	5.365	5.2886	5.9886	6.0796	5.7912
neg_94	(9S,10S)-9,10-dihydroxyoctadecanoate	metab_9097	yes	down	C15988	neg	-	315.254	7.14035	M-H, M+Cl, M+Na-2H	C18H36O4	-	41.7	HMDB0059633	-	-	-	-	-	Lipids and lipid-like molecules	Fatty Acyls	Fatty acids and conjugates	-	41.7	-	-	1.0499	1.0489	0.9406	0.02874	0.09471	5.4148	5.5242	5.6042	5.97	5.9286	5.687
neg_100	Chorismate	metab_9103	yes	up	C00251	neg	617-12-9	451.089	2.54185	M+Na-2H, 2M-H, M-H2O-H	C10H10O6	-	58.3	HMDB0012199	-	-	map01100;map01110;map01240;map00130;map00998;map01230;map00790;map00400	Metabolism;Metabolism;Metabolism;Metabolism;Metabolism;Metabolism;Metabolism;Metabolism	Global and overview maps;Global and overview maps;Global and overview maps;Metabolism of cofactors and vitamins;Biosynthesis of other secondary metabolites;Global and overview maps;Metabolism of cofactors and vitamins;Amino acid metabolism	Organic acids and derivatives	Carboxylic acids and derivatives	Dicarboxylic acids and derivatives	-	58.3	Metabolic pathways;Biosynthesis of secondary metabolites;Biosynthesis of cofactors;Ubiquinone and other terpenoid-quinone biosynthesis;Biosynthesis of various secondary metabolites - part 2;Biosynthesis of amino acids;Folate biosynthesis;Phenylalanine, tyrosine and tryptophan biosynthesis	Metabolic pathways;Biosynthesis of secondary metabolites;Biosynthesis of cofactors;Ubiquinone and other terpenoid-quinone biosynthesis;Biosynthesis of various secondary metabolites - part 2;Biosynthesis of amino acids;Folate biosynthesis;Phenylalanine, tyrosine and tryptophan biosynthesis	1.6937	1.6905	1.4081	0.02046	0.07654	3.1685	3.0021	2.9088	2.164	1.7549	2.5279
neg_101	L-glycyl-L-hydroxyproline	metab_9104	yes	down	-	neg	-	223.045	0.64105	M-H, M+FA-H, M+Cl	C7H12N2O4	-	61	-	-	-	-	-	-	-	-	-	-	61	-	-	1.1785	1.1704	0.9077	0.01635	0.0676	4.2843	4.0403	3.9756	4.428	4.5416	4.5813
neg_104	Cymorcin monoglucoside	metab_9107	yes	up	-	neg	76859-62-6	327.145	2.65607	M-H, M+Cl, M+FA-H	C16H24O7	-	37	HMDB0029777	-	-	-	-	-	Organic oxygen compounds	Organooxygen compounds	Carbohydrates and carbohydrate conjugates	-	37	-	-	1.4767	1.4557	1.2639	0.01959	0.07456	3.2066	2.9342	3.2998	2.7318	2.2636	2.4738
neg_112	3',6-Disinapoylsucrose	metab_9115	yes	up	-	neg	139891-98-8	753.225	2.93103	M-H, M+Cl, M+Na-2H	C34H42O19	-	81.7	HMDB0040838	-	-	-	-	-	Phenylpropanoids and polyketides	Cinnamic acids and derivatives	Hydroxycinnamic acids and derivatives	-	81.7	-	-	1.7459	1.734	1.1834	0.00471	0.03696	5.5681	5.6269	5.6266	4.7039	4.4935	5.0153
neg_113	(+/-)-Taxifolin	metab_9116	yes	up	-	neg	149418-37-1	303.051	3.05855	M-H, M+Na-2H, M-H2O-H	C15H12O7	73.7	-	HMDB0040894	-	-	-	-	-	Phenylpropanoids and polyketides	Stilbenes	Not Available	73.7	-	-	-	3.149	3.1244	2.0732	2.322e-07	0.0001268	5.2284	5.1312	5.1158	2.463	2.5052	2.4952
neg_114	2-Feruloyl-1-sinapoylgentiobiose	metab_9117	yes	up	-	neg	-	723.215	3.05855	M-H, M+Na-2H, M+Cl	C33H40O18	-	68.1	HMDB0030334	-	-	-	-	-	Phenylpropanoids and polyketides	Cinnamic acids and derivatives	Hydroxycinnamic acids and derivatives	-	68.1	-	-	1.1281	1.1216	1.0677	0.007693	0.04537	5.7899	5.8736	5.8495	5.4388	5.3634	5.6015
neg_120	Cinncassiol D4 2-glucoside	metab_9122	yes	up	-	neg	-	559.277	3.44482	M-H, M+Cl, M+FA-H	C26H42O10	-	47.4	HMDB0035065	-	-	-	-	-	Lipids and lipid-like molecules	Prenol lipids	Terpene glycosides	-	47.4	-	-	1.4829	1.4698	1.1409	0.002043	0.02343	5.1368	4.8651	4.9178	4.3148	4.3847	4.378
neg_270	(-)-Citramalic acid	metab_9272	yes	down	-	neg	-	147.029	1.45982	M-H, M+FA-H	C5H8O5	55.9	-	-	-	-	-	-	-	-	-	-	55.9	-	-	-	1.1353	1.1252	0.9171	0.01216	0.05727	4.3895	4.151	4.1384	4.6181	4.6578	4.5482
neg_315	Thiomorpholine 3-carboxylate	metab_9317	yes	up	C03901	neg	20960-92-3	353.088	1.70663	M+FA-H, 2M+Hac-H	C5H9NO2S	-	32.8	HMDB0059611	-	-	-	-	-	Organic acids and derivatives	Carboxylic acids and derivatives	Amino acids, peptides, and analogues	-	32.8	-	-	1.8509	1.8351	1.4262	0.0006137	0.01221	3.1755	3.1696	3.1034	2.292	2.0211	2.3104
neg_391	Monotropein	metab_9393	yes	up	C09788	neg	5945-50-6	389.109	2.023	M-H, M+Cl	C16H22O11	-	49.9	HMDB0035608;LMPR0102070012	-	-	-	-	-	Lipids and lipid-like molecules	Prenol lipids	Terpene glycosides	-	49.9	-	-	2.6674	2.644	1.8171	0.000312	0.008612	4.4903	4.2115	4.261	2.1947	2.2779	2.66
neg_428	3-O-Feruloylquinic acid	metab_9430	yes	up	C02572	neg	62929-69-5	367.103	2.11192	M-H, M+Na-2H	C17H20O9	-	64.9	HMDB0030669	-	-	-	-	-	Organic oxygen compounds	Organooxygen compounds	Alcohols and polyols	-	64.9	-	-	1.2871	1.2772	1.1039	0.000536	0.01159	4.8802	4.827	4.7982	4.3071	4.3962	4.4358
neg_430	2-(3,4,5-trihydroxyphenyl)-3,4-dihydro-2H-1-benzopyran-3,4,5,7-tetrol	metab_9432	yes	up	-	neg	-	303.051	2.24608	M-H2O-H, M+Na-2H	C15H14O8	-	52.2	-	-	-	-	-	-	-	-	-	-	52.2	-	-	3.1951	3.1687	2.7087	5.185e-05	0.002983	4.678	4.1924	4.2707	1.6133	1.6228	1.6164
neg_444	Irilone 4'-glucoside	metab_9446	yes	up	-	neg	50868-47-8	441.083	2.31362	M-H2O-H, M+FA-H	C22H20O11	-	40.9	HMDB0033818	-	-	-	-	-	Phenylpropanoids and polyketides	Isoflavonoids	Isoflavonoid O-glycosides	-	40.9	-	-	1.9215	1.9078	1.3191	0.001601	0.02073	4.3316	4.2736	4.1695	2.9746	3.3382	3.3701
neg_466	2',5'-Dihydroxyacetophenone	metab_9468	yes	up	-	neg	490-78-8	197.045	2.45027	M+FA-H, 2M-H	C8H8O3	-	33.3	HMDB0032629	-	-	-	-	-	Organic oxygen compounds	Organooxygen compounds	Carbonyl compounds	-	33.3	-	-	1.3472	1.3391	1.1473	0.002865	0.02847	4.1041	4.032	3.8753	3.4201	3.4885	3.5611
neg_500	Astilbin	metab_9502	yes	up	C17449	neg	29838-67-3	495.115	2.61043	M-H, M+FA-H	C21H22O11	-	66.3	HMDB0242667;HMDB0033850	-	-	-	-	-	Phenylpropanoids and polyketides	Flavonoids	Flavonoid glycosides	-	66.3	-	-	1.7241	1.7096	1.3137	0.004753	0.03717	3.7417	3.4054	3.4942	2.641	2.5458	2.9135
neg_523	2-O-Benzoyl-D-glucose	metab_9525	yes	up	-	neg	63029-01-6	329.088	2.74795	M+Na-2H, M+FA-H	C13H16O7	-	77.4	HMDB0034618	-	-	-	-	-	Organic oxygen compounds	Organooxygen compounds	Carbohydrates and carbohydrate conjugates	-	77.4	-	-	2.742	2.7204	2.4411	0.0001047	0.004645	3.7238	3.345	3.308	1.4134	1.4226	1.4163
neg_537	3-Phenylpropyl glucosinolate	metab_9539	yes	up	-	neg	76265-25-3	436.071	2.81658	M-H, M+Na-2H	C16H23NO9S2	-	32.6	HMDB0038422	-	-	-	-	-	Organic oxygen compounds	Organooxygen compounds	Carbohydrates and carbohydrate conjugates	-	32.6	-	-	1.5017	1.4913	1.1714	0.001639	0.02092	4.4108	4.2753	4.2309	3.553	3.7618	3.7145
neg_576	Gamma-delta-Dioxovaleric acid	metab_9578	yes	up	C02800	neg	-	151.003	3.0362	M+Na-2H, 2M+FA-H	C5H6O4	-	55.9	HMDB0013233	-	-	map00860	Metabolism	Metabolism of cofactors and vitamins	Organic acids and derivatives	Keto acids and derivatives	Gamma-keto acids and derivatives	-	55.9	Porphyrin and chlorophyll metabolism	Porphyrin and chlorophyll metabolism	2.3314	2.3208	1.8087	0.0002605	0.007462	3.3766	3.3036	3.276	1.8312	2.0419	1.6332
neg_578	3,4,5-trihydroxy-6-[2-(2-hydroxybenzoyloxy)phenoxy]oxane-2-carboxylic acid	metab_9580	yes	up	-	neg	-	451.088	3.05855	M-H, M+FA-H	C19H18O10	-	58.3	-	-	-	-	-	-	-	-	-	-	58.3	-	-	2.8337	2.8145	1633.36	1.446e-05	0.001527	2.0822	2.3451	2.0934	0.0013	0.0013	0.0013
neg_671	Trilobatin	metab_9673	yes	up	-	neg	4192-90-9	435.13	3.28508	M-H2O-H, M-H	C21H24O10	-	80.3	HMDB0037505;LMPK12120518	-	-	-	-	-	Phenylpropanoids and polyketides	Flavonoids	Flavonoid glycosides	-	80.3	-	-	3.4498	3.4186	2.4623	0.0001764	0.006334	5.7337	5.2809	5.3333	2.335	1.8337	2.4691
neg_676	5-(3',4',5'-Trihydroxyphenyl)-gamma-valerolactone-3'-O-glucuronide	metab_9678	yes	up	-	neg	-	437.052	3.1937	M+Na-2H, M+K-2H	C17H20O11	-	30.2	HMDB0059984	-	-	-	-	-	Organic oxygen compounds	Organooxygen compounds	Carbohydrates and carbohydrate conjugates	-	30.2	-	-	1.5926	1.5803	1.2546	0.006058	0.0406	3.7907	3.5019	3.4998	2.7307	2.814	3.0572
neg_723	2-(3,5-dihydroxyphenyl)-3,5,6,7-tetrahydroxy-3,4-dihydro-2H-1-benzopyran-4-one	metab_9725	yes	up	-	neg	-	319.046	2.77092	M-H, M+Na-2H	C15H12O8	-	78.8	-	-	-	-	-	-	-	-	-	-	78.8	-	-	2.2544	2.2366	1.9018	0.000567	0.01164	3.2228	2.8194	2.7888	1.5438	1.5532	1.5468
neg_771	Gentisein	metab_9773	yes	up	C10065	neg	529-49-7	289.036	2.47328	M+FA-H, 2M+FA-H	C13H8O5	-	64.1	HMDB0029463	-	-	-	-	-	Organoheterocyclic compounds	Benzopyrans	1-benzopyrans	-	64.1	-	-	1.793	1.7828	1.5766	0.000989	0.01576	2.591	2.4853	2.2421	1.5432	1.5526	1.5462
neg_832	1,11-Undecanedicarboxylic acid	metab_9833	yes	down	-	neg	505-52-2	243.16	5.9005	M-H, M+Na-2H	C13H24O4	63.3	-	HMDB0002327	-	-	-	-	-	Lipids and lipid-like molecules	Fatty Acyls	Fatty acids and conjugates	63.3	-	-	-	1.149	1.1377	0.9057	0.0007916	0.01359	3.5102	3.4859	3.4335	3.8456	3.8925	3.7802
neg_889	LysoPC(14:0/0:0)	metab_9890	yes	up	C04230	neg	20559-16-4	512.299	7.05497	M+Cl, M+FA-H	C22H46NO7P	-	88.9	HMDB0010379;PW_C006388	Lipids	Phospholipids	map00564	Metabolism	Lipid metabolism	Lipids and lipid-like molecules	Glycerophospholipids	Glycerophosphocholines	-	88.9	Glycerophospholipid metabolism	Glycerophospholipid metabolism	1.0505	1.0383	1.0587	0.007735	0.04548	5.6354	5.7119	5.847	5.4449	5.386	5.4093
neg_924	LysoPA(i-14:0/0:0)	metab_9925	yes	up	-	neg	-	363.194	7.53683	M-H2O-H, M-H	C17H35O7P	-	35.6	HMDB0114765	-	-	-	-	-	Lipids and lipid-like molecules	Glycerophospholipids	Glycerophosphates	-	35.6	-	-	1.5528	1.5368	1.1626	0.001373	0.01928	4.9112	4.6451	4.7737	4.0906	4.0612	4.1762
neg_1111	Fluorocitric acid	metab_10112	yes	up	-	neg	-	190.998	1.93463	M-H2O-H, M-H	C6H7FO7	-	44	-	-	-	-	-	-	-	-	-	-	44	-	-	1.2161	1.1991	1.2958	0.04288	0.1024	1.939	1.9334	2.3708	1.5277	1.537	1.7521
neg_1124	Erinapyrone A	metab_10125	yes	up	-	neg	146064-66-6	123.044	1.68385	M-H2O-H, M-H	C7H10O3	-	50.8	HMDB0041426	-	-	-	-	-	Organoheterocyclic compounds	Pyrans	Pyranones and derivatives	-	50.8	-	-	1.2345	1.2258	1.1187	3.469e-05	0.002453	3.8936	3.9226	3.8623	3.4658	3.4728	3.5003
neg_1298	Adenosine-5'-monophosphate	metab_10299	yes	up	C00020	neg	61-19-8	328.045	1.39423	M-H2O-H, M-H	C10H14N5O7P	70.2	-	HMDB0000045	Nucleic acids	Nucleotides	map01100;map01240;map01110;map00230;map00908	Metabolism;Metabolism;Metabolism;Metabolism;Metabolism	Global and overview maps;Global and overview maps;Global and overview maps;Nucleotide metabolism;Metabolism of terpenoids and polyketides	Nucleosides, nucleotides, and analogues	Purine nucleotides	Purine ribonucleotides	70.2	-	Metabolic pathways;Biosynthesis of cofactors;Biosynthesis of secondary metabolites;Purine metabolism;Zeatin biosynthesis	Metabolic pathways;Biosynthesis of cofactors;Biosynthesis of secondary metabolites;Purine metabolism;Zeatin biosynthesis	1.2621	1.2638	1.1898	0.04745	0.1096	3.4848	3.2034	3.1841	2.801	2.4761	3.0206
neg_1302	Glycerophosphocholine	metab_10303	yes	up	C00670	neg	28319-77-9	292.072	0.602	M+Cl, M+FA-H	C8H20NO6P	88.2	-	HMDB0008060;HMDB0008162;HMDB0008587;HMDB0008159;HMDB0008030;HMDB0008422;HMDB0008062;HMDB0008521;HMDB0007963;HMDB0008226;HMDB0007928;HMDB0008720;HMDB0008094;HMDB0008093;HMDB0008291;HMDB0008391;HMDB0008820;HMDB0008554;HMDB0008622;HMDB0008261;HMDB0007929;HMDB0008718;HMDB0008786;HMDB0007895;HMDB0008524;HMDB0000086;HMDB0008193;HMDB0008787;HMDB0008621;HMDB0008455;HMDB0008358;HMDB0008425;HMDB0008488;HMD…	-	-	map00565;map00564	Metabolism;Metabolism	Lipid metabolism;Lipid metabolism	Lipids and lipid-like molecules	Glycerophospholipids	Glycerophosphocholines	88.2	-	Ether lipid metabolism;Glycerophospholipid metabolism	Ether lipid metabolism;Glycerophospholipid metabolism	1.2682	1.2589	1.0948	0.005012	0.03814	5.2798	5.3749	5.3099	4.9145	4.7087	4.9603
neg_1316	Glutamylasparagine	metab_10317	yes	up	-	neg	36314-37-1	242.079	0.622617	M-H2O-H, M+K-2H	C9H15N3O6	-	38.4	HMDB0028814	-	-	-	-	-	Organic acids and derivatives	Carboxylic acids and derivatives	Amino acids, peptides, and analogues	-	38.4	-	-	1.1936	1.1838	1.0748	0.005425	0.03922	5.8381	5.889	5.8566	5.5286	5.3067	5.5235
neg_1369	Cis-Aconitic Acid	metab_10370	yes	down	C00417	neg	585-84-2	173.008	0.698933	M-H, M-H2O-H	C6H6O6	62.3	-	PW_C000051;HMDB0000072	Organic acids	Carboxylic acids	map01100;map00630;map01110;map01210;map00020;map00660	Metabolism;Metabolism;Metabolism;Metabolism;Metabolism;Metabolism	Global and overview maps;Carbohydrate metabolism;Global and overview maps;Global and overview maps;Carbohydrate metabolism;Carbohydrate metabolism	Organic acids and derivatives	Carboxylic acids and derivatives	Tricarboxylic acids and derivatives	62.3	-	Metabolic pathways;Glyoxylate and dicarboxylate metabolism;Biosynthesis of secondary metabolites;2-Oxocarboxylic acid metabolism;Citrate cycle (TCA cycle);C5-Branched dibasic acid metabolism	Metabolic pathways;Glyoxylate and dicarboxylate metabolism;Biosynthesis of secondary metabolites;2-Oxocarboxylic acid metabolism;Citrate cycle (TCA cycle);C5-Branched dibasic acid metabolism	1.2854	1.2737	0.9104	0.007434	0.04438	5.0174	4.789	4.7603	5.3405	5.4172	5.2444
neg_1425	6-Oxopiperidine-2-carboxylic acid	metab_10426	yes	down	-	neg	-	188.056	1.0313	M-H, M+FA-H	C6H9NO3	-	47.8	HMDB0061705	-	-	-	-	-	Organic acids and derivatives	Carboxylic acids and derivatives	Amino acids, peptides, and analogues	-	47.8	-	-	1.008	0.9989	0.9355	0.006837	0.04295	4.3591	4.2213	4.1775	4.5763	4.5407	4.5202
neg_1548	N-Methyl-1-deoxynojirimycin	metab_10549	yes	up	-	neg	69567-10-8	214.048	0.602	M+K-2H	C7H15NO4	-	77.9	HMDB0035360	-	-	-	-	-	Organoheterocyclic compounds	Piperidines	Not Available	-	77.9	-	-	1.4114	1.4025	1.1237	0.00243	0.02594	5.0997	5.1455	5.0201	4.4911	4.4219	4.6696
neg_1618	3-(3-methylbut-2-en-1-yl)-4-(sulfooxy)benzoic acid	metab_10619	yes	down	-	neg	-	571.092	0.75995	2M-H	C12H14O6S	-	36.6	-	-	-	-	-	-	-	-	-	-	36.6	-	-	1.1078	1.1024	0.9159	0.008354	0.0471	3.8872	3.879	3.9374	4.256	4.3849	4.137
neg_1619	Ribonolactone	metab_10620	yes	down	C02674	neg	5336-08-03	129.018	0.778817	M-H2O-H	C5H8O5	-	53.6	HMDB0001900	-	-	-	-	-	Organic oxygen compounds	Organooxygen compounds	Carbohydrates and carbohydrate conjugates	-	53.6	-	-	1.2857	1.2744	0.9062	0.003605	0.03231	4.637	4.4686	4.4632	4.9938	5.0775	4.9014
neg_1646	Fluticasone 17beta-carboxylic acid	metab_10647	yes	down	-	neg	-	431.14	0.924583	M+Cl	C21H26F2O5	-	49.3	HMDB0061092	-	-	-	-	-	Lipids and lipid-like molecules	Steroids and steroid derivatives	Androstane steroids	-	49.3	-	-	1.3897	1.3784	0.8817	0.03151	0.09926	4.74	4.5482	4.3077	5.3289	5.2226	4.8678
neg_1724	D-Xylono-1,5-lactone	metab_10725	yes	down	C02266	neg	-	129.018	1.24832	M-H2O-H	C5H8O5	-	59.7	HMDB0011676	-	-	map01100;map00040	Metabolism;Metabolism	Global and overview maps;Carbohydrate metabolism	Organoheterocyclic compounds	Lactones	Delta valerolactones	-	59.7	Metabolic pathways;Pentose and glucuronate interconversions	Metabolic pathways;Pentose and glucuronate interconversions	1.1882	1.1762	0.9249	0.004421	0.03569	5.0283	4.9172	4.8375	5.3431	5.3921	5.2502
neg_1758	Guanosine-3',5'-cyclic monophosphate	metab_10759	yes	down	-	neg	-	344.04	1.41658	M-H	C10H12N5O7P	92.2	-	-	-	-	-	-	-	-	-	-	92.2	-	-	-	1.589	1.5909	0.7084	0.00513	0.03869	1.7717	1.7566	1.7399	2.5533	2.2263	2.6567
neg_1871	N-Acetylcystathionine	metab_10872	yes	down	-	neg	20619-80-1	527.152	1.66145	2M-H	C9H16N2O5S	-	37.6	HMDB0002381	-	-	-	-	-	Organic acids and derivatives	Carboxylic acids and derivatives	Amino acids, peptides, and analogues	-	37.6	-	-	2.6214	2.6001	0.5975	9.8e-05	0.004526	2.5853	2.8814	2.829	4.4759	4.6883	4.7208
neg_1965	N-Acetylmuramate	metab_10965	yes	down	C02713	neg	61633-75-8	274.093	1.82058	M-H2O-H	C11H19NO8	-	33.8	HMDB0060493	Carbohydrates	Monosaccharides	map01100;map00520	Metabolism;Metabolism	Global and overview maps;Carbohydrate metabolism	Organic oxygen compounds	Organooxygen compounds	Carbohydrates and carbohydrate conjugates	-	33.8	Metabolic pathways;Amino sugar and nucleotide sugar metabolism	Metabolic pathways;Amino sugar and nucleotide sugar metabolism	1.002	1.0062	0.9103	0.04377	0.1039	3.3473	3.3118	3.3553	3.797	3.7617	3.4435
neg_1977	Indole-3-carboxylic acid	metab_10977	yes	down	C19837	neg	771-50-6	206.046	1.84355	M+FA-H	C9H7NO2	35.3	-	HMDB0003320	-	-	-	-	-	Organoheterocyclic compounds	Indoles and derivatives	Indolecarboxylic acids and derivatives	35.3	-	-	-	1.0676	1.0575	0.9221	0.008837	0.04841	4.0298	3.9247	3.8065	4.2032	4.2599	4.2896
neg_2019	Cinnamtannin B2	metab_11019	yes	up	C17629	neg	88038-12-4	575.12	1.88938	M-2H	C60H48O24	-	34	HMDB0037668	-	-	-	-	-	Lipids and lipid-like molecules	Prenol lipids	Monoterpenoids	-	34	-	-	2.9315	2.9069	1.7366	1.472e-05	0.001527	5.5565	5.4537	5.406	3.2283	2.99	3.2357
neg_2026	4,6,7-trihydroxy-2H-chromen-2-one	metab_11026	yes	up	-	neg	-	193.013	1.91197	M-H	C9H6O5	-	65.7	-	-	-	-	-	-	-	-	-	-	65.7	-	-	1.3727	1.3635	1.1814	0.0002423	0.007089	3.4087	3.3263	3.3097	2.7917	2.8867	2.8235
neg_2049	Cinnamtannin A2	metab_11049	yes	up	C17625	neg	86631-38-1	576.127	1.93463	M-2H	C60H50O24	-	49.9	HMDB0037661	-	-	-	-	-	Phenylpropanoids and polyketides	Flavonoids	Biflavonoids and polyflavonoids	-	49.9	-	-	3.9739	3.9425	4.7789	1.481e-06	0.000457	5.5709	5.2872	5.2853	1.1221	1.1311	1.125
neg_2056	Endalin	metab_11056	yes	down	-	neg	106908-12-7	264.055	1.95627	M+Cl	C9H12FN3O3	-	56.4	HMDB0041887	-	-	-	-	-	Nucleosides, nucleotides, and analogues	Pyrimidine nucleosides	Pyrimidine 2'',3''-dideoxyribonucleosides	-	56.4	-	-	1.5446	1.5447	0.7175	0.03532	0.09926	2.2234	1.5538	2.1131	3.0018	2.5629	2.6442
neg_2113	Cinnamtannin II	metab_11113	yes	up	C17626	neg	86631-39-2	720.159	2.023	M-2H	C75H62O30	-	54.4	HMDB0037659	-	-	-	-	-	Phenylpropanoids and polyketides	Flavonoids	Biflavonoids and polyflavonoids	-	54.4	-	-	3.6379	3.6096	2.8274	0.0001043	0.004645	5.6934	5.4666	5.4998	2.4069	1.7758	1.7086
neg_2116	3-O-p-Coumaroylquinic acid	metab_11116	yes	up	-	neg	-	337.093	2.04542	M-H	C16H18O8	-	69.2	HMDB0029681	-	-	-	-	-	Organic oxygen compounds	Organooxygen compounds	Alcohols and polyols	-	69.2	-	-	2.1205	2.103	1.5365	0.002728	0.02751	3.8006	3.469	3.5983	2.035	2.5812	2.4585
neg_2122	6-Hydroxyluteolin	metab_11122	yes	up	C10072	neg	18003-33-3	301.035	2.06765	M-H	C15H10O7	-	50.5	LMPK12111229;HMDB0036632	-	-	-	-	-	Phenylpropanoids and polyketides	Flavonoids	Flavones	-	50.5	-	-	2.02	2.0056	1.5945	0.006475	0.04222	3.5807	3.086	2.8293	1.9966	1.8896	2.0689
neg_2125	Phlorisobutyrophenone 2-glucoside	metab_11125	yes	up	-	neg	17004-75-0	357.119	2.06765	M-H	C16H22O9	-	33.9	HMDB0029651	-	-	-	-	-	Organic oxygen compounds	Organooxygen compounds	Carbohydrates and carbohydrate conjugates	-	33.9	-	-	1.7159	1.7068	1.3616	0.002925	0.02881	3.2621	3.2636	2.9057	2.2758	2.2443	2.4057
neg_2130	Luteolin	metab_11130	yes	up	C01514	neg	491-70-3	285.041	2.0893	M-H	C15H10O6	49.4	-	LMPK12110006;HMDB0005800	-	-	map01100;map00941;map01110;map00944	Metabolism;Metabolism;Metabolism;Metabolism	Global and overview maps;Biosynthesis of other secondary metabolites;Global and overview maps;Biosynthesis of other secondary metabolites	Phenylpropanoids and polyketides	Flavonoids	Flavones	49.4	-	Metabolic pathways;Flavonoid biosynthesis;Biosynthesis of secondary metabolites;Flavone and flavonol biosynthesis	Metabolic pathways;Flavonoid biosynthesis;Biosynthesis of secondary metabolites;Flavone and flavonol biosynthesis	2.2971	2.2795	1.8298	0.006621	0.04252	3.8865	3.2402	2.9671	2.0111	1.6286	1.8769
neg_2238	3-Methyl-3-butenyl apiosyl-(1->6)-glucoside	metab_11238	yes	down	-	neg	198832-72-3	379.161	2.33608	M-H	C16H28O10	-	56.9	HMDB0031954	-	-	-	-	-	Lipids and lipid-like molecules	Fatty Acyls	Fatty acyl glycosides	-	56.9	-	-	1.0879	1.0756	0.8879	0.007749	0.04548	2.7738	2.754	2.5735	3.0887	2.9987	3.0369
neg_2249	Gentiobiosyl 2-methyl-6-oxo-2E,4E-heptadienoate	metab_11249	yes	up	-	neg	-	459.151	2.3586	M-H2O-H	C20H30O13	-	37.6	HMDB0032134	-	-	-	-	-	Organic oxygen compounds	Organooxygen compounds	Carbohydrates and carbohydrate conjugates	-	37.6	-	-	1.0587	1.0462	1.0797	0.01718	0.06931	4.4844	4.5144	4.6618	4.3485	4.141	4.1644
neg_2293	Alloathyriol	metab_11293	yes	up	-	neg	67370-97-2	319.046	2.45027	M+FA-H	C14H10O6	-	77.6	HMDB0038715	-	-	-	-	-	Organoheterocyclic compounds	Benzopyrans	1-benzopyrans	-	77.6	-	-	2.0561	2.0416	1.6844	0.0003716	0.009609	3.0446	2.8185	2.6883	1.688	1.6975	1.691
neg_2320	(-)-Shikimic acid	metab_11320	yes	up	C00493	neg	138-59-0	173.045	2.496	M-H	C7H10O5	65.7	-	HMDB0003070	-	-	map01100;map00400;map01110;map01230;map01240	Metabolism;Metabolism;Metabolism;Metabolism;Metabolism	Global and overview maps;Amino acid metabolism;Global and overview maps;Global and overview maps;Global and overview maps	Organic oxygen compounds	Organooxygen compounds	Alcohols and polyols	65.7	-	Metabolic pathways;Phenylalanine, tyrosine and tryptophan biosynthesis;Biosynthesis of secondary metabolites;Biosynthesis of amino acids;Biosynthesis of cofactors	Metabolic pathways;Phenylalanine, tyrosine and tryptophan biosynthesis;Biosynthesis of secondary metabolites;Biosynthesis of amino acids;Biosynthesis of cofactors	1.1794	1.168	1.1323	0.0006507	0.01251	3.3187	3.2214	3.2704	2.8659	2.8554	2.944
neg_2386	7-hydroxy-1-oxo-1H-isochromene-3-carboxylic acid	metab_11386	yes	up	-	neg	-	205.014	2.61043	M-H	C10H6O5	-	61.9	-	-	-	-	-	-	-	-	-	-	61.9	-	-	1.8229	1.8098	1.4714	0.006467	0.04222	3.0589	2.8996	2.9942	2.0532	1.7089	2.3224
neg_2498	Rhoifolin	metab_11498	yes	up	C12627	neg	17306-46-6	623.163	2.79372	M+FA-H	C27H30O14	-	62.5	HMDB0038848;HMDB0303149	-	-	map00944	Metabolism	Biosynthesis of other secondary metabolites	Phenylpropanoids and polyketides	Flavonoids	Flavonoid glycosides	-	62.5	Flavone and flavonol biosynthesis	Flavone and flavonol biosynthesis	1.4815	1.4735	1.1777	0.008119	0.04654	4.1233	4.4178	4.2238	3.4978	3.5311	3.8098
neg_2508	7-Hydroxy-2-methyl-4-oxo-4H-1-benzopyran-5-carboxylic acid	metab_11508	yes	up	-	neg	-	219.029	2.83958	M-H	C11H8O5	-	73.5	HMDB0036346	-	-	-	-	-	Organoheterocyclic compounds	Benzopyrans	1-benzopyrans	-	73.5	-	-	2.1543	2.1401	1.5937	0.0002138	0.006646	3.5156	3.3341	3.3291	2.2481	2.1549	1.9843
neg_2647	1-Methoxy-1-(2,4,5-trimethoxyphenyl)-2-propanol	metab_11647	yes	up	-	neg	98205-47-1	557.261	3.12563	2M+FA-H	C13H20O5	-	31.2	HMDB0031772	-	-	-	-	-	Benzenoids	Benzene and substituted derivatives	Phenylpropanes	-	31.2	-	-	1.0746	1.0668	1.0847	0.03681	0.09926	4.9964	4.6802	4.6142	4.3581	4.3779	4.44
neg_2654	Quercetin-3-glucoside	metab_11654	yes	up	C05623	neg	482-35-9	463.089	3.1481	M-H	C21H20O12	97.1	-	HMDB0037362;HMDB0247252	-	-	map01100;map01110;map00944	Metabolism;Metabolism;Metabolism	Global and overview maps;Global and overview maps;Biosynthesis of other secondary metabolites	Phenylpropanoids and polyketides	Flavonoids	Flavonoid glycosides	97.1	-	Metabolic pathways;Biosynthesis of secondary metabolites;Flavone and flavonol biosynthesis	Metabolic pathways;Biosynthesis of secondary metabolites;Flavone and flavonol biosynthesis	3.2092	3.1878	5.6892	0.004909	0.03774	3.7647	3.4267	3.5194	0.1131	0.1154	1.654
neg_2719	5,7-Dihydroxy-4'-methoxy-8-methylisoflavanone	metab_11719	yes	up	-	neg	163021-16-7	345.098	3.28508	M+FA-H	C17H16O5	-	43.4	HMDB0041322	-	-	-	-	-	Phenylpropanoids and polyketides	Isoflavonoids	O-methylated isoflavonoids	-	43.4	-	-	2.715	2.6933	2.1764	0.0001819	0.006402	4.0129	3.5707	3.554	1.7019	1.7114	1.7049
neg_2759	3,8-Dihydroxy-9-methoxycoumestan	metab_11759	yes	up	-	neg	-	343.046	3.37632	M+FA-H	C16H10O6	-	79.5	HMDB0030562	-	-	-	-	-	Phenylpropanoids and polyketides	Isoflavonoids	Coumestans	-	79.5	-	-	2.8108	2.7819	5.0668	0.0006045	0.0121	2.9933	2.2637	2.8218	0.5285	0.5353	0.5307
neg_2768	6,7-Dihydroxycoumarin	metab_11768	yes	up	C09263	neg	305-01-1	177.018	3.39918	M-H	C9H6O4	57.7	-	HMDB0030819	-	-	-	-	-	Phenylpropanoids and polyketides	Coumarins and derivatives	Hydroxycoumarins	57.7	-	-	-	1.5683	1.5532	1.1978	0.0008657	0.01419	4.1992	4.0118	4.0871	3.4017	3.343	3.5218
neg_2778	Orientin 7,3'-dimethyl ether	metab_11778	yes	up	-	neg	89915-55-9	457.114	3.422	M-H2O-H	C23H24O11	-	77.1	HMDB0037450;LMPK12111047	-	-	-	-	-	Phenylpropanoids and polyketides	Flavonoids	Flavonoid glycosides	-	77.1	-	-	3.4277	3.4004	2.8336	1.191e-08	2.021e-05	4.9251	4.8527	4.8858	1.7213	1.7307	1.7243
neg_2821	6-(1-benzofuran-4-yloxy)-3,4,5-trihydroxyoxane-2-carboxylic acid	metab_11821	yes	up	-	neg	-	331.046	3.51303	M+Na-2H	C14H14O8	-	82	-	-	-	-	-	-	-	-	-	-	82	-	-	2.0455	2.032	1.4978	7.394e-05	0.003774	3.5088	3.4656	3.2876	2.2794	2.289	2.2825
neg_2826	Eriodictyol-7-O-glucoside	metab_11826	yes	up	-	neg	38965-51-4	449.11	3.51303	M-H	C21H22O11	92.9	-	HMDB0029544	-	-	-	-	-	Benzenoids	Benzene and substituted derivatives	Benzoic acids and derivatives	92.9	-	-	-	1.8433	1.8253	1.5143	0.008704	0.04803	3.3131	2.6289	2.7925	1.919	1.9285	1.922
neg_2864	3-(6-hydroxy-7-methoxy-2H-1,3-benzodioxol-5-yl)prop-2-enoic acid	metab_11864	yes	up	-	neg	-	259.025	3.60422	M+Na-2H	C11H10O6	-	41.1	-	-	-	-	-	-	-	-	-	-	41.1	-	-	1.8198	1.8129	1.2605	0.00721	0.04383	4.8843	4.6076	4.4437	3.9379	3.6627	3.4553
neg_2872	3-Dehydroquinate	metab_11872	yes	up	C00944	neg	10534-44-8	211.024	3.62702	M+Na-2H	C7H10O6	-	69.6	HMDB0012710	-	-	map01100;map00400;map01110;map01230	Metabolism;Metabolism;Metabolism;Metabolism	Global and overview maps;Amino acid metabolism;Global and overview maps;Global and overview maps	Organic acids and derivatives	Hydroxy acids and derivatives	Alpha hydroxy acids and derivatives	-	69.6	Metabolic pathways;Phenylalanine, tyrosine and tryptophan biosynthesis;Biosynthesis of secondary metabolites;Biosynthesis of amino acids	Metabolic pathways;Phenylalanine, tyrosine and tryptophan biosynthesis;Biosynthesis of secondary metabolites;Biosynthesis of amino acids	1.7965	1.7834	1.3119	4.198e-05	0.002639	3.7495	3.6852	3.6044	2.837	2.7806	2.798
neg_2878	Marmesin rhamnoside	metab_11878	yes	up	-	neg	142347-99-7	373.129	3.62702	M-H2O-H	C20H24O8	-	74.6	HMDB0039564	-	-	-	-	-	Phenylpropanoids and polyketides	Coumarins and derivatives	Furanocoumarins	-	74.6	-	-	2.3262	2.3078	1.5604	2.609e-05	0.00206	4.1394	3.9954	4.0771	2.5215	2.7028	2.6021
neg_2895	Cortolone-3-glucuronide	metab_11895	yes	up	-	neg	56162-46-0	541.266	3.67257	M-H	C27H42O11	-	62.4	HMDB0010320	-	-	-	-	-	Lipids and lipid-like molecules	Steroids and steroid derivatives	Steroidal glycosides	-	62.4	-	-	1.2131	1.2051	1.0989	0.008038	0.04624	4.9251	4.7157	4.6639	4.2715	4.3936	4.3527
neg_2900	METHYL 7-DESHYDROXYPYROGALLIN-4-CARBOXYLATE	metab_11900	yes	up	-	neg	-	261.04	3.69532	M-H	C13H10O6	53.2	-	-	-	-	-	-	-	-	-	-	53.2	-	-	-	1.5632	1.5451	1.4726	0.008019	0.04621	2.4389	1.9414	2.2182	1.4895	1.4988	1.4925
neg_2954	9S-hydroxy-11,15-dioxo-5Z,13E-prostadienoic acid	metab_11954	yes	up	C04758	neg	-	395.207	3.83205	M+FA-H	C20H30O5	-	40.2	HMDB0062297;LMFA03010206	-	-	-	-	-	Lipids and lipid-like molecules	Fatty Acyls	Eicosanoids	-	40.2	-	-	1.5835	1.5703	1.1496	1.48e-05	0.001527	5.2057	5.1929	5.2047	4.4746	4.5313	4.5659
neg_2978	Epigallocatechin gallate	metab_11978	yes	up	C09731	neg	989-51-5	439.067	3.90032	M-H2O-H	C22H18O11	-	57.9	HMDB0003153	-	-	-	-	-	Phenylpropanoids and polyketides	Flavonoids	Flavans	-	57.9	-	-	2.6964	2.7107	4.2663	0.02521	0.087	3.3715	2.7841	2.7067	0.0782	1.9201	0.0787
neg_3067	HIERACIN	metab_12067	yes	up	-	neg	-	301.035	4.17323	M-H	C15H10O7	62.5	-	-	-	-	-	-	-	-	-	-	62.5	-	-	-	2.1435	2.1263	1.3818	0.002304	0.02524	4.8255	4.5299	4.5971	3.6908	3.2307	3.1771
neg_3125	2-(3,5-dihydroxyphenyl)-3,5,6,7-tetrahydroxy-4H-chromen-4-one	metab_12125	yes	up	-	neg	-	299.02	4.37797	M-H2O-H	C15H10O8	-	45.9	-	-	-	-	-	-	-	-	-	-	45.9	-	-	2.5559	2.534	2.0229	0.0003699	0.009609	3.7388	3.3612	3.4788	1.9726	1.6313	1.6249
neg_3130	Phenylalanyl-Valine	metab_12130	yes	up	-	neg	3918-90-9	527.286	4.40073	2M-H	C14H20N2O3	-	58.4	HMDB0029008	-	-	-	-	-	Organic acids and derivatives	Carboxylic acids and derivatives	Amino acids, peptides, and analogues	-	58.4	-	-	1.5129	1.5022	1.1736	0.000671	0.01275	4.3405	4.258	4.1983	3.5316	3.692	3.6802
neg_3196	4-Hydroxy-5-(3'-hydroxyphenyl)-valeric acid-3'-O-sulphate	metab_12196	yes	up	-	neg	-	311.02	4.71948	M+Na-2H	C11H14O7S	-	45.2	HMDB0059975	-	-	-	-	-	Lipids and lipid-like molecules	Fatty Acyls	Fatty acids and conjugates	-	45.2	-	-	1.7292	1.7157	1.3092	0.004313	0.03544	3.894	3.4814	3.4342	2.7473	2.757	2.7504
neg_3512	12-OPDA	metab_12512	yes	up	C01226	neg	85551-10-6	291.197	6.62337	M-H	C18H28O3	59	-	HMDB0301804	-	-	map01100;map00592;map01110	Metabolism;Metabolism;Metabolism	Global and overview maps;Lipid metabolism;Global and overview maps	Lipids and lipid-like molecules	Fatty Acyls	Eicosanoids	59	-	Metabolic pathways;alpha-Linolenic acid metabolism;Biosynthesis of secondary metabolites	Metabolic pathways;alpha-Linolenic acid metabolism;Biosynthesis of secondary metabolites	1.0161	1.0176	1.0874	0.03724	0.09926	4.0994	4.154	4.1375	3.6663	3.7172	4.0098
neg_3601	LysoPA(20:3(5Z,8Z,11Z)/0:0)	metab_12601	yes	down	-	neg	-	505.257	7.06917	M+FA-H	C23H41O7P	-	50.9	HMDB0114747	-	-	-	-	-	Lipids and lipid-like molecules	Glycerophospholipids	Glycerophosphates	-	50.9	-	-	1.6065	1.6056	0.7804	0.009137	0.04962	2.6173	2.4955	3.0217	3.4562	3.4378	3.5282
neg_3705	Cis-9,10-Epoxystearic acid	metab_12704	yes	up	C19418	neg	2443-39-2	297.243	7.51592	M-H	C18H34O3	34.4	-	HMDB0247617	-	-	map00073	Metabolism	Lipid metabolism	Lipids and lipid-like molecules	Fatty Acyls	Lineolic acids and derivatives	34.4	-	Cutin, suberine and wax biosynthesis	Cutin, suberine and wax biosynthesis	1.3578	1.3578	1.0996	0.003353	0.03092	5.8155	5.7861	5.6901	5.3291	5.3027	5.0933
neg_3773	1-Oleoylglycerophosphoinositol	metab_12772	yes	down	-	neg	1114770-15-8	597.306	7.83945	M-H	C27H51O12P	-	53.3	HMDB0061693	-	-	-	-	-	Lipids and lipid-like molecules	Glycerophospholipids	Glycerophosphoinositols	-	53.3	-	-	1.0082	0.9984	0.9419	0.006865	0.04295	4.7691	4.7908	4.7024	5.147	4.9835	5.0105
neg_3792	CPA(18:2(9Z,12Z)/0:0)	metab_12791	yes	up	-	neg	-	415.226	7.89978	M-H	C21H37O6P	-	65.2	HMDB0007007	-	-	-	-	-	Lipids and lipid-like molecules	Fatty Acyls	Lineolic acids and derivatives	-	65.2	-	-	1.5021	1.486	1.1347	0.001891	0.02264	5.3991	5.1372	5.3108	4.5909	4.6491	4.7249
neg_3876	CPA(16:0/0:0)	metab_12875	yes	up	-	neg	-	391.226	8.34532	M-H	C19H37O6P	-	90.5	HMDB0007003	-	-	-	-	-	Lipids and lipid-like molecules	Glycerophospholipids	Glycerophosphates	-	90.5	-	-	1.5322	1.5197	1.1307	0.001291	0.01879	5.754	5.5991	5.5686	4.9298	4.9337	5.1029
neg_3988	(3beta,5alpha,9alpha,14alpha,22E,24R)-3,5,9,14-Tetrahydroxyergosta-7,22-dien-6-one	metab_12987	yes	up	-	neg	211486-14-5	441.301	8.73403	M-H2O-H	C28H44O5	-	39.9	HMDB0032690	-	-	-	-	-	Lipids and lipid-like molecules	Steroids and steroid derivatives	Ergostane steroids	-	39.9	-	-	1.3878	1.3797	1.1422	0.005169	0.03872	4.3713	4.4126	4.4662	4.0498	3.823	3.7292
neg_4282	GPA(18:2/18:2)	metab_13281	yes	down	-	neg	-	695.466	10.1283	M-H	C39H69O8P	79.4	-	-	-	-	-	-	-	-	-	-	79.4	-	-	-	1.5079	1.5095	0.8663	0.0139	0.06149	4.4267	4.4668	4.2219	5.1017	4.7773	5.2617
neg_5088	PI(16:0/18:2(9Z,12Z))	metab_14087	yes	up	-	neg	219584-66-4	833.519	10.7528	M-H	C43H79O13P	-	39.7	LMGP06010959;HMDB0009784	-	-	-	-	-	Lipids and lipid-like molecules	Glycerophospholipids	Glycerophosphoinositols	-	39.7	-	-	1.13	1.1238	1.0645	0.01489	0.064	6.3566	6.3854	6.2634	6.0363	5.7791	6.0386
neg_5124	GPA(18:1/18:2)	metab_14123	yes	down	-	neg	-	697.482	10.307	M-H	C39H71O8P	85.2	-	-	-	-	-	-	-	-	-	-	85.2	-	-	-	1.4209	1.4136	0.871	0.03606	0.09926	4.4708	4.4698	4.0275	5.1332	4.6765	5.0804
neg_5172	1-Palmitoyl-2-linoleoyl PE	metab_14171	yes	up	-	neg	-	714.508	10.0403	M-H	C39H74NO8P	69.6	-	-	-	-	-	-	-	-	-	-	69.6	-	-	-	1.0064	1.0106	1.0661	0.04093	0.09926	5.2996	5.4116	5.3084	4.934	4.8773	5.217
neg_5195	DG(16:0/20:2(11Z,14Z)/0:0)	metab_14194	yes	up	C00165	neg	-	641.511	9.93125	M+Na-2H	C39H72O5	-	43.5	PW_C003160;HMDB0007109	-	-	-	-	-	Lipids and lipid-like molecules	Glycerolipids	Diradylglycerols	-	43.5	-	-	1.5232	1.5184	1.1852	0.01835	0.07158	4.4568	4.5507	4.5075	3.8351	3.4719	4.096
neg_5324	Annomuricin-D-one	metab_14323	yes	down	-	neg	-	633.438	9.31478	M+Na-2H	C35H64O8	-	70.4	HMDB0030890	-	-	-	-	-	Lipids and lipid-like molecules	Fatty Acyls	Fatty alcohols	-	70.4	-	-	1.0198	1.0265	0.9263	0.02341	0.08345	4.0162	4.0659	4.0678	4.453	4.1947	4.467
neg_5539	(+)-15,16-Dihydroxyoctadecanoic acid	metab_14538	yes	down	-	neg	-	297.243	8.6433	M-H2O-H	C18H36O4	-	33.9	HMDB0031008	-	-	-	-	-	Lipids and lipid-like molecules	Fatty Acyls	Fatty acids and conjugates	-	33.9	-	-	1.2668	1.2638	0.9154	0.004096	0.03467	4.9271	4.9303	4.9109	5.2557	5.3584	5.5194
neg_5598	CPA(18:1(11Z)/0:0)	metab_14597	yes	up	-	neg	-	417.241	8.4601	M-H	C21H39O6P	-	67.3	HMDB0007005	-	-	-	-	-	Lipids and lipid-like molecules	Glycerophospholipids	Glycerophosphates	-	67.3	-	-	1.3447	1.3327	1.1123	0.003364	0.03098	5.1973	4.9806	5.0101	4.5165	4.4966	4.6428
neg_5639	Pravastatin	metab_14638	yes	up	C01844	neg	81093-37-0	459.213	8.34532	M+Cl	C23H36O7	-	46.7	HMDB0256737;LMFA05000695;PW_C002369;HMDB0005022	-	-	-	-	-	Organoheterocyclic compounds	Lactones	Delta valerolactones	-	46.7	-	-	1.5776	1.5664	1.1828	0.001927	0.02281	4.6308	4.5103	4.3871	3.7413	3.752	3.9434
neg_5652	1-Palmitoyl Lysophosphatidic Acid	metab_14651	yes	up	-	neg	-	409.236	8.29942	M-H	C19H39O7P	61.8	-	-	-	-	-	-	-	-	-	-	61.8	-	-	-	1.0168	1.0097	1.0694	0.0106	0.05325	4.811	4.6845	4.5991	4.4368	4.342	4.3998
neg_5787	LysoPA(0:0/18:2(9Z,12Z))	metab_14786	yes	down	-	neg	-	433.236	7.83945	M-H	C21H39O7P	-	86.2	HMDB0007852	-	-	-	-	-	Lipids and lipid-like molecules	Glycerophospholipids	Glycerophosphates	-	86.2	-	-	1.3917	1.3852	0.8903	0.00859	0.04775	4.6912	4.596	4.3902	5.1661	4.9729	5.2239
neg_5794	1-Palmitoylglycerophosphoinositol	metab_14793	yes	up	-	neg	1425501-12-7	571.289	7.81812	M-H	C25H49O12P	-	51.4	HMDB0061695	-	-	-	-	-	Lipids and lipid-like molecules	Glycerophospholipids	Glycerophosphoinositols	-	51.4	-	-	1.2198	1.21	1.0902	6.361e-06	0.001028	4.8483	4.8147	4.8403	4.4439	4.4388	4.4178
neg_5961	3-?Methyl-?5-?propyl-2-?furantridecanoic acid	metab_14960	yes	down	-	neg	-	381.265	7.29117	M+FA-H	C21H36O3	-	58.7	HMDB0112079	-	-	-	-	-	Lipids and lipid-like molecules	Fatty Acyls	Fatty acids and conjugates	-	58.7	-	-	1.6724	1.6583	0.834	5.078e-05	0.002946	3.7656	3.8493	3.7783	4.4925	4.5698	4.5984
neg_6376	KOPARIN 2'-METHYL ETHER	metab_15375	yes	up	-	neg	-	313.072	5.44493	M-H	C17H14O6	66.7	-	-	-	-	-	-	-	-	-	-	66.7	-	-	-	1.1674	1.167	1.1451	0.008571	0.04773	3.1994	3.2133	3.057	2.8769	2.7472	2.6482
neg_6402	Traumatin	metab_15401	yes	down	C16309	neg	65410-38-0	233.115	5.3095	M+Na-2H	C12H20O3	-	49.4	HMDB0037326;LMFA01060093	-	-	map00592;map01110	Metabolism;Metabolism	Lipid metabolism;Global and overview maps	Lipids and lipid-like molecules	Fatty Acyls	Fatty acids and conjugates	-	49.4	alpha-Linolenic acid metabolism;Biosynthesis of secondary metabolites	alpha-Linolenic acid metabolism;Biosynthesis of secondary metabolites	1.3439	1.3388	0.8072	0.01554	0.06569	2.2727	2.2804	2.2547	2.7996	3.0479	2.5852
neg_6484	Parthenin	metab_15483	yes	up	C09523	neg	508-59-8	261.113	4.94718	M-H	C15H18O4	63.7	-	LMPR0103420001;HMDB0253304	-	-	-	-	-	Lipids and lipid-like molecules	Prenol lipids	Terpene lactones	63.7	-	-	-	1.0905	1.086	1.2413	0.02759	0.09202	1.7112	2.0805	1.9797	1.5462	1.5556	1.5492
neg_6506	Gomphidic acid	metab_15505	yes	up	-	neg	25328-77-2	393.025	4.83337	M+Na-2H	C18H12O9	-	58.1	HMDB0033542	-	-	-	-	-	Benzenoids	Phenols	Benzenetriols and derivatives	-	58.1	-	-	2.0024	1.9925	1.414	0.01773	0.07045	4.6169	4.1365	3.7264	3.2985	2.7849	2.742
neg_6634	2-Keto-3-deoxy-6-phosphogluconic acid	metab_15632	yes	up	C04442	neg	27244-54-8	303.015	4.37797	M+FA-H	C6H11O9P	-	61.7	HMDB0001376	-	-	map01100;map00030;map01200	Metabolism;Metabolism;Metabolism	Global and overview maps;Carbohydrate metabolism;Global and overview maps	Organic acids and derivatives	Keto acids and derivatives	Medium-chain keto acids and derivatives	-	61.7	Metabolic pathways;Pentose phosphate pathway;Carbon metabolism	Metabolic pathways;Pentose phosphate pathway;Carbon metabolism	1.7236	1.7176	1.3578	0.04832	0.1108	4.2518	3.7096	3.2652	3.1625	2.5908	2.5148
neg_6686	3-[[5-Methyl-2-(1-methylethyl)cyclohexyl]oxy]-1,2-propanediol	metab_15684	yes	down	-	neg	87061-04-9	275.186	4.2187	M+FA-H	C13H26O3	-	39.1	HMDB0036133	-	-	-	-	-	Lipids and lipid-like molecules	Prenol lipids	Monoterpenoids	-	39.1	-	-	2.0477	2.0485	0.6136	0.03874	0.09926	2.4314	1.5268	2.5636	3.6955	3.9923	2.9413
neg_6774	1-Hydroxy-3-nonanone	metab_15772	yes	down	-	neg	67801-46-1	203.128	3.9913	M+FA-H	C9H18O2	-	43.3	LMFA05000601;HMDB0037143	-	-	-	-	-	Lipids and lipid-like molecules	Fatty Acyls	Fatty alcohols	-	43.3	-	-	2.3174	2.3051	0.5405	0.0187	0.0726	2.3083	1.8373	1.6034	3.7978	4.0239	2.8126
neg_6784	Eriodictyol	metab_15782	yes	up	C05631	neg	552-58-9	287.056	3.96858	M-H	C15H12O6	82.5	-	HMDB0005810;LMPK12140002	-	-	map01100;map00941;map01110	Metabolism;Metabolism;Metabolism	Global and overview maps;Biosynthesis of other secondary metabolites;Global and overview maps	Phenylpropanoids and polyketides	Flavonoids	Flavans	82.5	-	Metabolic pathways;Flavonoid biosynthesis;Biosynthesis of secondary metabolites	Metabolic pathways;Flavonoid biosynthesis;Biosynthesis of secondary metabolites	1.9505	1.9331	1.331	0.0003595	0.009577	4.3538	4.0401	4.14	3.1352	3.1448	3.1382
neg_6815	1-O-Feruloylglucose	metab_15813	yes	up	-	neg	7196-71-6	377.088	3.90032	M+Na-2H	C16H20O9	-	66.2	HMDB0036938	-	-	-	-	-	Phenylpropanoids and polyketides	Cinnamic acids and derivatives	Hydroxycinnamic acids and derivatives	-	66.2	-	-	1.5828	1.5858	1.3312	0.0247	0.0859	3.3727	3.3799	2.7376	2.2942	2.5166	2.3186
neg_6835	8-iso-15-keto-PGE2	metab_15833	yes	up	-	neg	914804-63-0	349.202	3.85477	M-H	C20H30O5	36.1	-	HMDB0002341;LMFA03110009	-	-	-	-	-	Lipids and lipid-like molecules	Fatty Acyls	Eicosanoids	36.1	-	-	-	1.3342	1.3216	1.1191	0.0008277	0.01384	4.5936	4.5702	4.6459	4.0222	4.1258	4.1917
neg_6878	4''-O-Acetylafzelin	metab_15876	yes	up	-	neg	135618-17-6	519.114	3.74102	M+FA-H	C23H22O11	-	45.9	HMDB0039746	-	-	-	-	-	Phenylpropanoids and polyketides	Flavonoids	Flavonoid glycosides	-	45.9	-	-	2.4442	2.4263	1.8236	7.245e-07	0.0002893	3.5887	3.6036	3.5073	1.9516	1.9612	1.9547
neg_6890	Azlocillin	metab_15888	yes	up	C06839	neg	37091-66-0	496.11	3.71818	M+Cl	C20H23N5O6S	-	40.1	HMDB0015194	-	-	-	-	-	Organic acids and derivatives	Carboxylic acids and derivatives	Amino acids, peptides, and analogues	-	40.1	-	-	3.6617	3.6323	17.0492	2.015e-05	0.001767	4.1584	3.6793	3.7054	0.2239	0.2279	0.2252
neg_6895	Oryzalide B	metab_15893	yes	up	-	neg	134885-94-2	365.197	3.71818	M+FA-H	C19H28O4	-	40.3	HMDB0037592	-	-	-	-	-	Lipids and lipid-like molecules	Prenol lipids	Terpene lactones	-	40.3	-	-	1.3461	1.334	1.1146	0.004928	0.03784	4.9808	5.0069	5.0978	4.3709	4.4995	4.6642
neg_6969	Malvidin 3-O-glucoside	metab_15967	yes	up	C12140	neg	18470-06-9;7228-78-6	491.12	3.55868	M-H	C23H24O12	66.7	-	HMDB0030777	-	-	map00942	Metabolism	Biosynthesis of other secondary metabolites	Phenylpropanoids and polyketides	Flavonoids	Flavonoid glycosides	66.7	-	Anthocyanin biosynthesis	Anthocyanin biosynthesis	1.3914	1.3798	1.1382	0.0001123	0.004951	4.2614	4.3483	4.3636	3.7785	3.792	3.826
neg_6972	13,14-Dihydro-15-keto-PGE2	metab_15970	yes	up	C04671	neg	363-23-5	351.218	3.55868	M-H	C20H32O5	46.9	-	HMDB0002776;LMFA03010031	-	-	-	-	-	Lipids and lipid-like molecules	Fatty Acyls	Eicosanoids	46.9	-	-	-	1.0905	1.0788	1.0765	0.006584	0.04248	4.8141	4.7532	4.8766	4.3632	4.5137	4.5419
neg_6982	6-Thioinosine-5'-monophosphate	metab_15980	yes	up	C04646	neg	53-83-8	409.024	3.53592	M+FA-H	C10H13N4O7PS	-	52.3	PW_C040504;HMDB0060416	-	-	-	-	-	Nucleosides, nucleotides, and analogues	Purine nucleotides	Purine ribonucleotides	-	52.3	-	-	1.407	1.4031	1.1217	0.002274	0.02505	5.0095	5.1436	5.1646	4.6196	4.6109	4.425
neg_6999	Vanillic acid-4-O-glucuronide	metab_15997	yes	up	-	neg	18191-12-3	363.072	3.51303	M+Na-2H	C15H18O9	-	84.7	HMDB0060024	-	-	-	-	-	Organic oxygen compounds	Organooxygen compounds	Carbohydrates and carbohydrate conjugates	-	84.7	-	-	3.167	3.1477	9.1389	0.0001046	0.004645	3.2033	3.2836	2.7148	0.3333	0.3385	0.335
neg_7002	2-O-(6-Phospho-alpha-mannosyl)-D-glycerate	metab_16000	yes	up	C16699	neg	-	329.03	3.51303	M-H2O-H	C9H17O12P	-	73.6	HMDB0012152	-	-	-	-	-	Organic oxygen compounds	Organooxygen compounds	Carbohydrates and carbohydrate conjugates	-	73.6	-	-	2.8955	2.8741	17.9234	0.0004209	0.01031	2.8465	2.3216	2.1337	0.1346	0.1372	0.1354
neg_7018	3,5,6,7-tetrahydroxy-2-phenyl-3,4-dihydro-2H-1-benzopyran-4-one	metab_16016	yes	up	-	neg	-	287.056	3.49032	M-H	C15H12O6	-	49.5	-	-	-	-	-	-	-	-	-	-	49.5	-	-	2.6189	2.6	2.0254	0.003241	0.03026	3.901	3.7811	3.8018	1.5802	1.5897	2.5007
neg_7096	Hesperetin	metab_16094	yes	up	C01709	neg	520-33-2	347.077	3.35355	M+FA-H	C16H14O6	-	74.2	HMDB0005782;LMPK12140003	-	-	map00941	Metabolism	Biosynthesis of other secondary metabolites	Phenylpropanoids and polyketides	Flavonoids	O-methylated flavonoids	-	74.2	Flavonoid biosynthesis	Flavonoid biosynthesis	1.8655	1.8517	1.3661	0.0008817	0.01432	3.51	3.5133	3.7005	2.4925	2.7851	2.5724
neg_7144	3-(3-hydroxyphenyl)-7-methoxy-3,4-dihydro-2H-1-benzopyran-4-one	metab_16142	yes	up	-	neg	-	315.088	3.28508	M+FA-H	C16H14O4	-	68.6	-	-	-	-	-	-	-	-	-	-	68.6	-	-	3.295	3.2681	2.8084	3.305e-05	0.002413	4.8416	4.387	4.446	1.6188	1.6282	1.6218
neg_7156	Gibberellin A86	metab_16154	yes	up	-	neg	138703-93-2	401.124	3.26223	M+Na-2H	C19H24O8	-	76.2	HMDB0038450	-	-	-	-	-	Lipids and lipid-like molecules	Prenol lipids	Diterpenoids	-	76.2	-	-	1.8225	1.8058	1.4281	0.03289	0.09926	3.5202	3.3722	3.6545	1.8247	2.7965	2.7655
neg_7175	Gly Leu Phe	metab_16173	yes	up	-	neg	-	334.177	3.23945	M-H	C17H25N3O4	74	-	-	-	-	-	-	-	-	-	-	74	-	-	-	1.3468	1.336	1.1863	0.001589	0.02067	3.1407	3.1825	3.3025	2.6361	2.7892	2.6905
neg_7176	2,4',5,7-Tetrahydroxyflavanone	metab_16174	yes	up	-	neg	58124-18-8	333.062	3.23945	M+FA-H	C15H12O6	-	87.9	HMDB0040314	-	-	-	-	-	Phenylpropanoids and polyketides	Flavonoids	Hydroxyflavonoids	-	87.9	-	-	2.6574	2.6362	2.1417	3.199e-05	0.002361	3.7656	3.4878	3.491	1.6676	1.6771	1.6706
neg_7205	6-Formylumbelliferone	metab_16203	yes	up	-	neg	-	235.024	3.1937	M+FA-H	C10H6O4	-	65.3	HMDB0039147	-	-	-	-	-	Phenylpropanoids and polyketides	Coumarins and derivatives	Hydroxycoumarins	-	65.3	-	-	1.9338	1.9181	1.7056	0.0001353	0.005504	2.5971	2.3817	2.3896	1.4359	1.4452	1.4389
neg_7288	Daphnetin	metab_16286	yes	up	C03093	neg	486-35-1	177.018	3.05855	M-H	C9H6O4	82.7	-	-	-	-	-	-	-	-	-	-	82.7	-	-	-	1.1641	1.1568	1.1156	0.000409	0.01013	3.5805	3.6409	3.5464	3.2527	3.1824	3.2161
neg_7310	Maleylacetoacetic acid	metab_16308	yes	up	C01036	neg	5698-52-2	221.009	3.0139	M+Na-2H	C8H8O6	-	47	HMDB0002052;PW_C001376;LMFA01170114	-	-	map01100;map00350	Metabolism;Metabolism	Global and overview maps;Amino acid metabolism	Organic acids and derivatives	Keto acids and derivatives	Medium-chain keto acids and derivatives	-	47	Metabolic pathways;Tyrosine metabolism	Metabolic pathways;Tyrosine metabolism	2.1418	2.125	1.8802	0.0007523	0.01334	2.9719	2.5827	2.5458	1.4349	1.4403	1.434
neg_7311	2-Ethyl-2-Hydroxybutyric acid	metab_16309	yes	down	-	neg	3639-21-2	131.07	3.0139	M-H	C6H12O3	35.7	-	HMDB0001975	-	-	-	-	-	Lipids and lipid-like molecules	Fatty Acyls	Fatty acids and conjugates	35.7	-	-	-	1.1139	1.1097	0.8966	0.02398	0.08463	3.2351	3.4141	3.2911	3.7545	3.8199	3.5112
neg_7317	5-Methoxysalicylic acid	metab_16315	yes	up	-	neg	2612-02-04	167.034	2.9984	M-H	C8H8O4	70.9	-	HMDB0001868	-	-	-	-	-	Benzenoids	Benzene and substituted derivatives	Benzoic acids and derivatives	70.9	-	-	-	1.8113	1.7983	1.2119	2.797e-06	0.0006514	5.0731	5.1046	5.0257	4.1843	4.176	4.1864
neg_7330	(E)-8-Hydroxy-2-octene-4,6-diynoic acid	metab_16328	yes	up	-	neg	65367-65-9	195.029	2.97622	M+FA-H	C8H6O3	-	54.3	HMDB0031515	-	-	-	-	-	Lipids and lipid-like molecules	Fatty Acyls	Fatty acids and conjugates	-	54.3	-	-	1.2665	1.2573	1.0992	0.0002816	0.007998	4.9087	4.8847	4.8053	4.4323	4.3915	4.458
neg_7350	Camellianin A	metab_16348	yes	up	-	neg	109232-77-1	665.175	2.93103	M+FA-H	C29H32O15	-	79.9	HMDB0029908	-	-	-	-	-	Phenylpropanoids and polyketides	Flavonoids	Flavonoid glycosides	-	79.9	-	-	2.1837	2.1785	1.4552	0.02231	0.08077	4.3953	5.0958	4.6358	3.1974	2.648	3.862
neg_7359	Sinapic acid	metab_16357	yes	up	C00482	neg	7361-90-2;7362-37-0;530-59-6;7362-37-0	223.061	2.93103	M-H	C11H12O5	94.4	-	HMDB0032616;HMDB0034069	-	-	map01100;map00940;map01110	Metabolism;Metabolism;Metabolism	Global and overview maps;Biosynthesis of other secondary metabolites;Global and overview maps	Phenylpropanoids and polyketides	Cinnamic acids and derivatives	Hydroxycinnamic acids and derivatives	94.4	-	Metabolic pathways;Phenylpropanoid biosynthesis;Biosynthesis of secondary metabolites	Metabolic pathways;Phenylpropanoid biosynthesis;Biosynthesis of secondary metabolites	1.3444	1.3358	1.1392	0.003222	0.03018	4.1631	4.2425	4.1642	3.6266	3.5788	3.8291
neg_7418	4-Hydroxy-6-methyl-3-(1-oxobutyl)-2H-pyran-2-one	metab_16416	yes	up	-	neg	22073-85-4	241.071	2.86252	M+FA-H	C10H12O4	-	57.9	HMDB0040637	-	-	-	-	-	Organic oxygen compounds	Organooxygen compounds	Carbonyl compounds	-	57.9	-	-	1.1087	1.1021	1.1898	0.0135	0.06063	2.2055	2.371	2.3268	1.8302	1.8995	2.0713
neg_7446	Gamma-Glutamylphenylalanine	metab_16444	yes	up	-	neg	7432-24-8	275.104	2.81658	M-H2O-H	C14H18N2O5	-	68.3	HMDB0000594	-	-	-	-	-	Organic acids and derivatives	Carboxylic acids and derivatives	Amino acids, peptides, and analogues	-	68.3	-	-	1.3272	1.3393	1.1722	0.02177	0.07961	3.5316	3.8416	3.7163	3.2867	3.2577	2.9186
neg_7512	Apigenin 7-[galactosyl-(1->4)-mannoside]	metab_16510	yes	up	-	neg	84638-36-8	593.152	2.72493	M-H	C27H30O15	-	88.2	HMDB0037852	-	-	-	-	-	Organic acids and derivatives	Carboxylic acids and derivatives	Carboxylic acid derivatives	-	88.2	-	-	1.297	1.289	1.1008	0.0003037	0.008482	4.9758	5.0548	5.0357	4.5103	4.6182	4.5578
neg_7525	Cordeauxione	metab_16523	yes	up	-	neg	1228-77-9	273.041	2.72493	M-H2O-H	C14H12O7	-	61.3	HMDB0034310	-	-	-	-	-	Organic acids and derivatives	Vinylogous acids	Not Available	-	61.3	-	-	2.4648	2.4459	2.2738	0.0007538	0.01334	3.3474	2.8543	2.7673	1.3113	1.3205	1.3143
neg_7552	Quercetin 3-[rhamnosyl-(1->2)-alpha-L-arabinopyranoside]	metab_16550	yes	up	-	neg	86749-52-2	601.121	2.6791	M+Na-2H	C26H28O15	-	54	HMDB0037928	-	-	-	-	-	Phenylpropanoids and polyketides	Flavonoids	Flavonoid glycosides	-	54	-	-	1.2353	1.2227	1.1673	0.02771	0.09223	3.2621	3.2317	3.4051	3.085	2.7007	2.6942
neg_7559	2,4,6-trihydroxy-2-[(4-hydroxyphenyl)methyl]-2,3-dihydro-1-benzofuran-3-one	metab_16557	yes	up	-	neg	-	287.056	2.6791	M-H	C15H12O6	-	63.5	-	-	-	-	-	-	-	-	-	-	63.5	-	-	2.5169	2.4971	1.6319	0.0005346	0.01159	4.8185	4.3192	4.3338	2.6633	2.8375	2.7558
neg_7647	Myricetin	metab_16645	yes	up	C10107	neg	529-44-2	317.03	2.56447	M-H	C15H10O8	41.5	-	HMDB0002755;LMPK12110001	-	-	map00941;map01110;map00944	Metabolism;Metabolism;Metabolism	Biosynthesis of other secondary metabolites;Global and overview maps;Biosynthesis of other secondary metabolites	Phenylpropanoids and polyketides	Flavonoids	Flavones	41.5	-	Flavonoid biosynthesis;Biosynthesis of secondary metabolites;Flavone and flavonol biosynthesis	Flavonoid biosynthesis;Biosynthesis of secondary metabolites;Flavone and flavonol biosynthesis	2.3991	2.3965	1.8276	0.004854	0.03749	3.7644	3.5748	3.5651	1.703	2.5576	1.7061
neg_7689	Phenylglucuronide	metab_16687	yes	up	-	neg	-	291.051	2.51885	M+Na-2H	C12H14O7	-	59.4	HMDB0059806	-	-	-	-	-	Organic oxygen compounds	Organooxygen compounds	Carbohydrates and carbohydrate conjugates	-	59.4	-	-	2.4249	2.3947	5.7077	0.003079	0.02948	2.1363	1.5391	2.3116	0.3486	0.1631	0.5373
neg_7711	Isoleucyl-Isoleucine	metab_16709	yes	down	-	neg	-	243.171	2.496	M-H	C12H24N2O3	-	51.4	HMDB0028910	-	-	-	-	-	Organic acids and derivatives	Carboxylic acids and derivatives	Amino acids, peptides, and analogues	-	51.4	-	-	1.3169	1.3113	0.8261	0.01919	0.07379	2.3968	2.6112	2.4725	3.1011	3.18	2.7765
neg_7812	N-Feruloylaspartic acid	metab_16810	yes	down	-	neg	135068-96-1	308.078	2.3586	M-H	C14H15NO7	-	72.2	HMDB0040830	-	-	-	-	-	Organic acids and derivatives	Carboxylic acids and derivatives	Amino acids, peptides, and analogues	-	72.2	-	-	1.3862	1.3908	0.8694	0.01045	0.05294	3.7738	3.8073	3.6882	4.3279	4.1102	4.5215
neg_7813	Wyeronic acid	metab_16811	yes	up	-	neg	117783-52-5	275.056	2.3586	M+FA-H	C13H10O4	-	45.9	HMDB0039141	-	-	-	-	-	Lipids and lipid-like molecules	Fatty Acyls	Fatty acids and conjugates	-	45.9	-	-	2.3233	2.306	2.0512	5.409e-06	0.0009923	2.9215	2.8421	2.766	1.3822	1.3915	1.3852
neg_7838	Quercetin 3-O-glucoside	metab_16836	yes	up	C05623	neg	482-35-9;21637-25-2	463.089	2.31362	M-H	C21H20O12	33	-	HMDB0037362	-	-	map01100;map01110;map00944	Metabolism;Metabolism;Metabolism	Global and overview maps;Global and overview maps;Biosynthesis of other secondary metabolites	Phenylpropanoids and polyketides	Flavonoids	Flavonoid glycosides	33	-	Metabolic pathways;Biosynthesis of secondary metabolites;Flavone and flavonol biosynthesis	Metabolic pathways;Biosynthesis of secondary metabolites;Flavone and flavonol biosynthesis	1.862	1.8458	1.5199	0.0008373	0.0139	2.9986	2.6581	2.7181	1.8649	1.8261	1.8196
neg_7871	Cystathionine ketimine	metab_16869	yes	down	-	neg	87254-95-3	224.002	2.2909	M+Na-2H	C7H9NO4S	-	36.4	HMDB0002015	-	-	-	-	-	Organic acids and derivatives	Carboxylic acids and derivatives	Amino acids, peptides, and analogues	-	36.4	-	-	1.5408	1.5277	0.6817	6.476e-05	0.003476	1.3923	1.3775	1.3613	2.0833	2.0191	1.9587
neg_7883	Pantetheine	metab_16881	yes	down	C00831	neg	496-65-1	277.123	2.26862	M-H	C11H22N2O4S	-	67.4	PW_C001887;HMDB0003426	-	-	map01110;map00770	Metabolism;Metabolism	Global and overview maps;Metabolism of cofactors and vitamins	Organic acids and derivatives	Carboxylic acids and derivatives	Amino acids, peptides, and analogues	-	67.4	Biosynthesis of secondary metabolites;Pantothenate and CoA biosynthesis	Biosynthesis of secondary metabolites;Pantothenate and CoA biosynthesis	1.2835	1.2789	0.8336	0.008481	0.04742	2.33	2.3234	2.6185	2.8698	2.9545	2.9009
neg_7926	P-Salicylic acid	metab_16924	yes	up	C00156	neg	99-96-7	137.023	2.20167	M-H	C7H6O3	78.3	-	HMDB0000500	-	-	map01100;map00130;map01110;map00790;map01240	Metabolism;Metabolism;Metabolism;Metabolism;Metabolism	Global and overview maps;Metabolism of cofactors and vitamins;Global and overview maps;Metabolism of cofactors and vitamins;Global and overview maps	Benzenoids	Benzene and substituted derivatives	Benzoic acids and derivatives	78.3	-	Metabolic pathways;Ubiquinone and other terpenoid-quinone biosynthesis;Biosynthesis of secondary metabolites;Folate biosynthesis;Biosynthesis of cofactors	Metabolic pathways;Ubiquinone and other terpenoid-quinone biosynthesis;Biosynthesis of secondary metabolites;Folate biosynthesis;Biosynthesis of cofactors	2.1597	2.1439	1.2777	2.063e-06	0.0005602	5.7431	5.844	5.7778	4.5449	4.5247	4.5212
neg_7942	Procyanidin B2	metab_16940	yes	up	C17639	neg	29106-49-8	577.135	2.1562	M-H	C30H26O12	94.7	-	LMPK12030002;HMDB0033973	-	-	-	-	-	Phenylpropanoids and polyketides	Flavonoids	Biflavonoids and polyflavonoids	94.7	-	-	-	2.3936	2.373	1.3674	0.0001313	0.005436	5.9201	5.7176	5.7474	4.0997	4.2163	4.3981
neg_7976	(S)C(S)S-S-Methylcysteine sulfoxide	metab_16973	yes	up	-	neg	32726-14-0	452.081	2.11192	3M-H	C4H9NO3S	-	34.2	HMDB0029432	-	-	-	-	-	Organic acids and derivatives	Carboxylic acids and derivatives	Amino acids, peptides, and analogues	-	34.2	-	-	1.3371	1.3361	1.1839	0.003999	0.03415	3.1871	3.4098	3.2526	2.8541	2.7962	2.6695
neg_8049	Theogallin	metab_17045	yes	up	C10834	neg	17365-11-6;53584-43-3	325.056	2.023	M-H2O-H	C14H16O10	-	70.7	HMDB0039287	-	-	-	-	-	Organic oxygen compounds	Organooxygen compounds	Alcohols and polyols	-	70.7	-	-	1.4324	1.4252	1.321	0.02568	0.08822	2.9324	2.5478	2.4225	1.8868	1.8963	2.1997
neg_8055	Valyl-Isoleucine	metab_17051	yes	down	-	neg	20556-14-3	229.155	2.023	M-H	C11H22N2O3	-	59.1	HMDB0029130	-	-	-	-	-	Organic acids and derivatives	Carboxylic acids and derivatives	Amino acids, peptides, and analogues	-	59.1	-	-	1.2422	1.2342	0.8591	0.0244	0.08546	2.9049	3.0074	2.7545	3.4584	3.4921	3.1383
neg_8058	Vanillin	metab_17054	yes	up	C00755	neg	121-33-5	151.039	2.023	M-H	C8H8O3	41.1	-	HMDB0245834;HMDB0012308;MJDBOTE0000374	-	-	map01100;map01110;map00998	Metabolism;Metabolism;Metabolism	Global and overview maps;Global and overview maps;Biosynthesis of other secondary metabolites	Benzenoids	Phenols	Methoxyphenols	41.1	-	Metabolic pathways;Biosynthesis of secondary metabolites;Biosynthesis of various secondary metabolites - part 2	Metabolic pathways;Biosynthesis of secondary metabolites;Biosynthesis of various secondary metabolites - part 2	1.4906	1.4821	1.161	3.593e-05	0.002453	4.3443	4.3503	4.3113	3.7495	3.771	3.6805
neg_8138	Lepidimoic acid	metab_17134	yes	down	-	neg	157676-09-0	343.067	1.93463	M+Na-2H	C12H18O10	-	76.1	HMDB0041096	-	-	-	-	-	Organic oxygen compounds	Organooxygen compounds	Carbohydrates and carbohydrate conjugates	-	76.1	-	-	1.236	1.2227	0.84	0.01042	0.05294	2.4461	2.4088	2.1706	2.8692	2.7084	2.7857
neg_8145	5,7-Dihydroxy-4H-1-benzopyran-4-one	metab_17141	yes	up	C09001	neg	31721-94-5	223.024	1.93463	M+FA-H	C9H6O4	-	70.2	HMDB0032950	-	-	-	-	-	Organoheterocyclic compounds	Benzopyrans	1-benzopyrans	-	70.2	-	-	1.4494	1.4384	1.2283	0.0005905	0.01197	3.1844	3.1153	3.0305	2.5953	2.4639	2.5373
neg_8148	L-Tryptophan	metab_17144	yes	up	C00078	neg	73-22-3	203.082	1.93463	M-H	C11H12N2O2	90.1	-	PW_C000741;HMDB0000929	Peptides	Amino acids	map01100;map01110;map00260;map01240;map01210;map00998;map01230;map00966;map00970;map00400;map00380	Metabolism;Metabolism;Metabolism;Metabolism;Metabolism;Metabolism;Metabolism;Metabolism;Genetic Information Processing;Metabolism;Metabolism	Global and overview maps;Global and overview maps;Amino acid metabolism;Global and overview maps;Global and overview maps;Biosynthesis of other secondary metabolites;Global and overview maps;Biosynthesis of other secondary metabolites;Translation;Amino acid metabolism;Amino acid metabolism	Organoheterocyclic compounds	Indoles and derivatives	Indolyl carboxylic acids and derivatives	90.1	-	Metabolic pathways;Biosynthesis of secondary metabolites;Glycine, serine and threonine metabolism;Biosynthesis of cofactors;2-Oxocarboxylic acid metabolism;Biosynthesis of various secondary metabolites - part 2;Biosynthesis of amino acids;Glucosinolate biosynthesis;Aminoacyl-tRNA biosynthesis;Phenylalanine, tyrosine and tryptophan biosynthesis;Tryptophan metabolism	Metabolic pathways;Biosynthesis of secondary metabolites;Glycine, serine and threonine metabolism;Biosynthesis of cofactors;2-Oxocarboxylic acid metabolism;Biosynthesis of various secondary metabolites - part 2;Biosynthesis of amino acids;Glucosinolate biosynthesis;Aminoacyl-tRNA biosynthesis;Phenylalanine, tyrosine and tryptophan biosynthesis;Tryptophan metabolism	1.2084	1.2056	1.0943	0.007175	0.04383	4.8178	5.0427	4.935	4.42	4.6036	4.497
neg_8160	Benzyl beta-primeveroside	metab_17156	yes	down	-	neg	130622-31-0	401.145	1.91197	M-H	C18H26O10	-	58.2	HMDB0041190	-	-	-	-	-	Organic oxygen compounds	Organooxygen compounds	Carbohydrates and carbohydrate conjugates	-	58.2	-	-	1.4149	1.3936	0.7515	0.02533	0.08729	1.7026	2.178	1.6709	2.4136	2.5907	2.386
neg_8290	3-Methoxy-4,5-methylenedioxybenzoic acid	metab_17286	yes	up	-	neg	526-34-1	241.035	1.77495	M+FA-H	C9H8O5	-	40.3	HMDB0030800	-	-	-	-	-	Benzenoids	Benzene and substituted derivatives	Benzoic acids and derivatives	-	40.3	-	-	1.0006	0.99	1.0994	0.005464	0.03922	3.153	3.0518	3.2159	2.8495	2.8943	2.8234
neg_8380	Bisnorbiotin	metab_17375	yes	up	C20384	neg	16968-98-2	261.055	1.68385	M+FA-H	C8H12N2O3S	-	43.5	HMDB0004821	-	-	map00780	Metabolism	Metabolism of cofactors and vitamins	Organic acids and derivatives	Carboxylic acids and derivatives	Amino acids, peptides, and analogues	-	43.5	Biotin metabolism	Biotin metabolism	1.2798	1.2665	1.1976	0.008614	0.04781	2.7592	2.9001	2.9955	2.4722	2.267	2.4887
neg_8408	2-amino-3-methylbutanedioic acid	metab_17403	yes	up	-	neg	-	146.045	1.66145	M-H	C5H9NO4	61.4	-	-	-	-	-	-	-	-	-	-	61.4	-	-	-	1.1351	1.1314	1.1505	0.04839	0.111	3.551	3.245	3.0415	2.7892	2.9195	2.8411
neg_8456	Valyl-Valine	metab_17451	yes	down	-	neg	3918-94-3	215.139	1.63925	M-H	C10H20N2O3	-	61.6	HMDB0029140	-	-	-	-	-	Organic acids and derivatives	Carboxylic acids and derivatives	Amino acids, peptides, and analogues	-	61.6	-	-	1.2428	1.2349	0.8226	0.04616	0.1076	2.407	2.4741	2.1023	2.9666	2.9609	2.5628
neg_8480	6-(2,4-dihydroxy-5-methoxybenzoyloxy)-3,4,5-trihydroxyoxane-2-carboxylic acid	metab_17475	yes	down	-	neg	-	359.062	1.61653	M-H	C14H16O11	-	56.4	-	-	-	-	-	-	-	-	-	-	56.4	-	-	2.4288	2.4171	0.5635	0.001949	0.02286	2.4768	1.7012	2.2346	3.8017	3.8061	3.7739
neg_8518	Beta-D-Glucopyranosyl anthranilate	metab_17513	yes	up	-	neg	-	344.099	1.57105	M+FA-H	C13H17NO7	-	57.7	HMDB0041517	-	-	-	-	-	Organic oxygen compounds	Organooxygen compounds	Carbohydrates and carbohydrate conjugates	-	57.7	-	-	1.3126	1.3088	1.1384	0.01229	0.05763	4.24	4.2527	4.1632	3.6173	3.5673	3.9341
neg_8573	Lactosamine	metab_17568	yes	down	C00203	neg	13000-25-4	322.114	1.45982	M-H2O-H	C12H23NO10	-	69.1	HMDB0006591	-	-	map01100;map00520	Metabolism;Metabolism	Global and overview maps;Carbohydrate metabolism	Lipids and lipid-like molecules	Fatty Acyls	Fatty acyl glycosides	-	69.1	Metabolic pathways;Amino sugar and nucleotide sugar metabolism	Metabolic pathways;Amino sugar and nucleotide sugar metabolism	2.2863	2.2696	0.7141	1.053e-05	0.001391	3.4962	3.5692	3.4991	4.9131	4.8629	5.0176
neg_8588	Histidinyl-Isoleucine	metab_17583	yes	up	-	neg	129050-48-2	267.146	1.43808	M-H	C12H20N4O3	-	47.6	HMDB0028888	-	-	-	-	-	Organic acids and derivatives	Carboxylic acids and derivatives	Amino acids, peptides, and analogues	-	47.6	-	-	1.163	1.1594	1.2199	0.003019	0.02913	2.1629	2.223	2.0215	1.746	1.7586	1.7491
neg_8616	Uridine-5'-monophosphate	metab_17611	yes	up	C00105	neg	58-97-9	323.028	1.39423	M-H	C9H13N2O9P	82.9	-	HMDB0000288	Nucleic acids	Nucleotides	map00240;map01100;map01240	Metabolism;Metabolism;Metabolism	Nucleotide metabolism;Global and overview maps;Global and overview maps	Nucleosides, nucleotides, and analogues	Pyrimidine nucleotides	Pyrimidine ribonucleotides	82.9	-	Pyrimidine metabolism;Metabolic pathways;Biosynthesis of cofactors	Pyrimidine metabolism;Metabolic pathways;Biosynthesis of cofactors	1.3962	1.3878	1.2712	0.02907	0.0956	3.2064	2.7888	2.639	2.1866	2.1962	2.4078
neg_8620	Xanthine	metab_17615	yes	down	C00385	neg	69-89-6	151.025	1.39423	M-H	C5H4N4O2	81	-	PW_C000198;HMDB0000292	-	-	map01100;map01110;map00230;map00232	Metabolism;Metabolism;Metabolism;Metabolism	Global and overview maps;Global and overview maps;Nucleotide metabolism;Biosynthesis of other secondary metabolites	Organoheterocyclic compounds	Imidazopyrimidines	Purines and purine derivatives	81	-	Metabolic pathways;Biosynthesis of secondary metabolites;Purine metabolism;Caffeine metabolism	Metabolic pathways;Biosynthesis of secondary metabolites;Purine metabolism;Caffeine metabolism	1.7183	1.7076	0.7924	0.0006817	0.01289	3.1728	2.9601	3.196	3.8834	4.0082	3.8843
neg_8698	Guanine	metab_17692	yes	down	C00242	neg	73-40-5	150.041	1.0313	M-H	C5H5N5O	91.8	-	HMDB0000132;PW_C000086	Nucleic acids	Bases	map01100;map00230	Metabolism;Metabolism	Global and overview maps;Nucleotide metabolism	Organoheterocyclic compounds	Imidazopyrimidines	Purines and purine derivatives	91.8	-	Metabolic pathways;Purine metabolism	Metabolic pathways;Purine metabolism	1.0877	1.0785	0.9023	0.0003833	0.009672	2.9794	2.989	2.9812	3.2491	3.3442	3.3259
neg_8712	Oxoglutaric acid	metab_17706	yes	down	C00026	neg	328-50-7	145.013	1.00985	M-H	C5H6O5	39.9	-	HMDB0000208;PW_C000134	Organic acids	Carboxylic acids	map01100;map00630;map00310;map01110;map00300;map01240;map01210;map00340;map00040;map01200;map00220;map00053;map00250;map01230;map00020;map00650;map00660;map00430	Metabolism;Metabolism;Metabolism;Metabolism;Metabolism;Metabolism;Metabolism;Metabolism;Metabolism;Metabolism;Metabolism;Metabolism;Metabolism;Metabolism;Metabolism;Metabolism;Metabolism;Metabolism	Global and overview maps;Carbohydrate metabolism;Amino acid metabolism;Global and overview maps;Amino acid metabolism;Global and overview maps;Global and overview maps;Amino acid metabolism;Carbohydrate metabolism;Global and overview maps;Amino acid metabolism;Carbohydrate metabolism;Amino acid metabolism;Global and overview maps;Carbohydrate metabolism;Carbohydrate metabolism;Carbohydrate metabo…	Organic acids and derivatives	Keto acids and derivatives	Gamma-keto acids and derivatives	39.9	-	Metabolic pathways;Glyoxylate and dicarboxylate metabolism;Lysine degradation;Biosynthesis of secondary metabolites;Lysine biosynthesis;Biosynthesis of cofactors;2-Oxocarboxylic acid metabolism;Histidine metabolism;Pentose and glucuronate interconversions;Carbon metabolism;Arginine biosynthesis;Ascorbate and aldarate metabolism;Alanine, aspartate and glutamate metabolism;Biosynthesis of amino aci…	Metabolic pathways;Glyoxylate and dicarboxylate metabolism;Lysine degradation;Biosynthesis of secondary metabolites;Lysine biosynthesis;Biosynthesis of cofactors;2-Oxocarboxylic acid metabolism;Histidine metabolism;Pentose and glucuronate interconversions;Carbon metabolism;Arginine biosynthesis;Ascorbate and aldarate metabolism;Alanine, aspartate and glutamate metabolism;Biosynthesis of amino aci…	1.3233	1.3098	0.867	0.0003121	0.008612	3.0902	3.1726	3.0426	3.6086	3.5595	3.5664
neg_8845	6-({[3,4-dihydroxy-4-(hydroxymethyl)oxolan-2-yl]oxy}methyl)oxane-2,3,4,5-tetrol	metab_17839	yes	down	-	neg	-	357.104	0.659333	M+FA-H	C11H20O10	-	48.4	-	-	-	-	-	-	-	-	-	-	48.4	-	-	1.3418	1.3296	0.8897	0.005862	0.04003	4.2408	4.1742	4.021	4.52	4.7107	4.7478
neg_8875	Arabinonic acid	metab_17869	yes	down	C00878	neg	488-30-2	165.039	0.64105	M-H	C5H10O6	-	63.6	HMDB0000539	-	-	map00053	Metabolism	Carbohydrate metabolism	Organic oxygen compounds	Organooxygen compounds	Carbohydrates and carbohydrate conjugates	-	63.6	Ascorbate and aldarate metabolism	Ascorbate and aldarate metabolism	1.142	1.1312	0.9249	0.02377	0.08407	5.1668	4.8614	4.825	5.3409	5.4156	5.3036
neg_8878	Allantoin	metab_17872	yes	up	C01551	neg	97-59-6	157.036	0.64105	M-H	C4H6N4O3	75	-	HMDB0000462	-	-	-	-	-	Organoheterocyclic compounds	Azoles	Imidazoles	75	-	-	-	1.0519	1.0456	1.0776	0.02275	0.08193	4.744	4.7141	4.7108	4.4749	4.1951	4.4785
neg_8907	D-Glucarate	metab_17900	yes	down	C00818	neg	87-73-0	209.03	0.622617	M-H	C6H10O8	65.5	-	HMDB0000663	-	-	map01100;map00053	Metabolism;Metabolism	Global and overview maps;Carbohydrate metabolism	Organic oxygen compounds	Organooxygen compounds	Carbohydrates and carbohydrate conjugates	65.5	-	Metabolic pathways;Ascorbate and aldarate metabolism	Metabolic pathways;Ascorbate and aldarate metabolism	1.8902	1.8743	0.7499	0.001776	0.02195	3.2235	2.8889	2.8263	3.8715	4.0511	4.0004
neg_46	(-)-Epicatechin	metab_18184	yes	up	C09727	neg	490-46-0;154-23-4	289.072	2.04542	M+Na-2H, M+Cl, M-H	C15H14O6	92.1	-	HMDB0001871;HMDB0002780	-	-	map01100;map00941;map01110	Metabolism;Metabolism;Metabolism	Global and overview maps;Biosynthesis of other secondary metabolites;Global and overview maps	Phenylpropanoids and polyketides	Flavonoids	Flavans	92.1	-	Metabolic pathways;Flavonoid biosynthesis;Biosynthesis of secondary metabolites	Metabolic pathways;Flavonoid biosynthesis;Biosynthesis of secondary metabolites	3.8204	3.8105	3.4415	0.0013	0.01882	5.9478	5.6532	5.5182	2.1791	2.1106	0.6839
neg_7965	EPIGALLOCATECHIN	metab_18189	yes	up	C12127;C12136	neg	970-74-1;490-46-0;970-73-0	305.068	2.134	M-H	C15H14O7	32	-	HMDB0302404;HMDB0038361;HMDB0001871;LMPK12020004;HMDB0038365	-	-	map00941;map01110	Metabolism;Metabolism	Biosynthesis of other secondary metabolites;Global and overview maps	Phenylpropanoids and polyketides	Flavonoids	Flavans	32	-	Flavonoid biosynthesis;Biosynthesis of secondary metabolites	Flavonoid biosynthesis;Biosynthesis of secondary metabolites	2.3212	2.3016	1.5955	0.0007602	0.01334	4.097	3.9106	3.9204	2.3676	2.3201	2.7878
neg_8648	Isocitrate	metab_18191	yes	down	C00311	neg	6061-97-8;320-77-4	191.019	1.2299	M-H	C6H8O7	76	-	HMDB0304324;HMDB0001874;HMDB0000193	Organic acids	Carboxylic acids	map01100;map00630;map01110;map01240;map01210;map01200;map01230;map00020	Metabolism;Metabolism;Metabolism;Metabolism;Metabolism;Metabolism;Metabolism;Metabolism	Global and overview maps;Carbohydrate metabolism;Global and overview maps;Global and overview maps;Global and overview maps;Global and overview maps;Global and overview maps;Carbohydrate metabolism	Organic acids and derivatives	Carboxylic acids and derivatives	Tricarboxylic acids and derivatives	76	-	Metabolic pathways;Glyoxylate and dicarboxylate metabolism;Biosynthesis of secondary metabolites;Biosynthesis of cofactors;2-Oxocarboxylic acid metabolism;Carbon metabolism;Biosynthesis of amino acids;Citrate cycle (TCA cycle)	Metabolic pathways;Glyoxylate and dicarboxylate metabolism;Biosynthesis of secondary metabolites;Biosynthesis of cofactors;2-Oxocarboxylic acid metabolism;Carbon metabolism;Biosynthesis of amino acids;Citrate cycle (TCA cycle)	1.3042	1.2927	0.925	0.006184	0.04115	6.1656	5.9748	5.9475	6.5329	6.6186	6.404
neg_6587	Phloretin	metab_18195	yes	up	C00774	neg	7507-89-3;60-82-2	273.077	4.53737	M-H	C15H14O5	55.7	-	LMPK12120525;HMDB0029646;HMDB0003306	-	-	map00941;map01110	Metabolism;Metabolism	Biosynthesis of other secondary metabolites;Global and overview maps	Organic oxygen compounds	Organooxygen compounds	Carbonyl compounds	55.7	-	Flavonoid biosynthesis;Biosynthesis of secondary metabolites	Flavonoid biosynthesis;Biosynthesis of secondary metabolites	2.5404	2.5188	2.0157	2.309e-05	0.001912	3.5983	3.3315	3.4426	1.711	1.7205	1.7141
