# Supplementary material for: Metabolomics Reveals Antioxidant Metabolites in Colored Rice Grains
Source: Metabolites. 2024 Feb 11;14(2):120. doi: 10.3390/metabo14020120 (PMC10891847; doi:10.3390/metabo14020120)
Supplement: Supplementary file 1 [file metabolites-14-00120-s001.zip › Table S8.xls]

## Sheet: Difference between groups
Table S8. DM information of HN and YCN1H comparison groups
ID	Metabolite	Metab ID	Significant	Regulate	KEGG Compound ID	Mode	CAS ID	M/Z	Retention time	Adducts	Formula	Fragmentation Score	Theoretical Fragmentation Score	Library ID	KEGG Compound First Category	KEGG Compound Second Category	KEGG Pathway ID	KEGG Pathway First Category	KEGG Pathway Second Category	HMDB Superclass	HMDB Class	HMDB Subclass	Fragmentation Score	Theoretical Fragmentation Score	KEGG Pathway Description	KEGG Pathway Description	VIP_pred_OPLS-DA	VIP_PLS-DA	FC(HN/YCN1H)	P_value	FDR	HN_1	HN_2	HN_3	YCN1H_1	YCN1H_2	YCN1H_3
pos_3	Gibberellin A14	metab_2	yes	up	C11858	pos	4955-22-0	349.201	3.13162	M+H, M+K, M+NH4, M+Na, 2M+NH4, 2M+Na, M+H-H2O, M+H-2H2O	C20H28O5	61.9	-	HMDB0303454;LMPR0104170015	-	-	map01100;map00904;map01110	Metabolism;Metabolism;Metabolism	Global and overview maps;Metabolism of terpenoids and polyketides;Global and overview maps	Lipids and lipid-like molecules	Prenol lipids	Diterpenoids	61.9	-	Metabolic pathways;Diterpenoid biosynthesis;Biosynthesis of secondary metabolites	Metabolic pathways;Diterpenoid biosynthesis;Biosynthesis of secondary metabolites	1.5887	1.5894	1.0784	0.003995	0.0693	6.4308	6.2328	6.431	5.8446	5.8805	5.9814
pos_14	PE(16:0/0:0)	metab_13	yes	down	-	pos	53862-35-4	454.293	8.02743	M+H, M+2Na-H, M+Na, 2M+Na, 2M+H, M+H-H2O	C21H44NO7P	98.4	-	LMGP02050002;HMDB0011503	-	-	-	-	-	Lipids and lipid-like molecules	Glycerophospholipids	Glycerophosphoethanolamines	98.4	-	-	-	1.2554	1.244	0.9599	0.000966	0.03579	6.6184	6.5549	6.5989	6.8273	6.8567	6.9142
pos_21	Citric acid	metab_20	yes	down	C00158	pos	77-92-9	215.016	1.24843	M+H-H2O, M+NH4, M+Na, M+H, M+H-2H2O	C6H8O7	83.7	-	PW_C000063;HMDB0000094	Organic acids	Carboxylic acids	map01100;map00630;map01110;map01240;map01210;map01200;map01230;map00250;map00020	Metabolism;Metabolism;Metabolism;Metabolism;Metabolism;Metabolism;Metabolism;Metabolism;Metabolism	Global and overview maps;Carbohydrate metabolism;Global and overview maps;Global and overview maps;Global and overview maps;Global and overview maps;Global and overview maps;Amino acid metabolism;Carbohydrate metabolism	Organic acids and derivatives	Carboxylic acids and derivatives	Tricarboxylic acids and derivatives	83.7	-	Metabolic pathways;Glyoxylate and dicarboxylate metabolism;Biosynthesis of secondary metabolites;Biosynthesis of cofactors;2-Oxocarboxylic acid metabolism;Carbon metabolism;Biosynthesis of amino acids;Alanine, aspartate and glutamate metabolism;Citrate cycle (TCA cycle)	Metabolic pathways;Glyoxylate and dicarboxylate metabolism;Biosynthesis of secondary metabolites;Biosynthesis of cofactors;2-Oxocarboxylic acid metabolism;Carbon metabolism;Biosynthesis of amino acids;Alanine, aspartate and glutamate metabolism;Citrate cycle (TCA cycle)	1.0798	1.0725	0.9551	0.03384	0.1781	5.0201	4.9033	5.0018	5.2389	5.3022	5.0858
pos_23	12-Oxo-20-carboxy-leukotriene B4	metab_22	yes	up	-	pos	-	387.178	2.92713	M+H, M+NH4, M+Na, M+H-H2O, M+H-2H2O	C20H28O6	-	65.6	HMDB0012550;LMFA03020047	-	-	-	-	-	Lipids and lipid-like molecules	Fatty Acyls	Fatty acids and conjugates	-	65.6	-	-	1.3602	1.3596	1.0658	0.006604	0.0889	5.6168	5.4873	5.6208	5.1334	5.2615	5.2978
pos_33	PC(18:2/0:0)	metab_32	yes	down	-	pos	-	520.34	7.59252	M+H, 2M+H, M+Na, M+K, M+H-H2O	C26H50NO7P	87.4	-	LMGP01050034	-	-	-	-	-	-	-	-	87.4	-	-	-	1.1382	1.1217	0.9677	0.01646	0.1376	7.4216	7.253	7.3487	7.5118	7.6329	7.6125
pos_61	PC(16:0/0:0)	metab_60	yes	down	C04230	pos	17364-16-8	518.322	8.75388	M+Na, 2M+H, 2M+Na, M+K	C24H50NO7P	97	-	HMDB0010382;LMGP01050018	Lipids	Phospholipids	map00564	Metabolism	Lipid metabolism	Lipids and lipid-like molecules	Glycerophospholipids	Glycerophosphocholines	97	-	Glycerophospholipid metabolism	Glycerophospholipid metabolism	1.0805	1.0677	0.9656	0.02652	0.1739	6.427	6.3963	6.5521	6.6112	6.7727	6.679
pos_94	2-amino-6-hydroxyhexanoic acid	metab_93	yes	down	-	pos	-	130.086	0.687917	M+H-H2O, M+ACN+H, M+H, M+H-2H2O	C6H13NO3	-	49.4	-	-	-	-	-	-	-	-	-	-	49.4	-	-	1.8033	1.7895	0.8945	6.433e-05	0.007536	4.7941	4.716	4.7319	5.2652	5.3378	5.3179
pos_134	Hydroxyphenylacetylglycine	metab_132	yes	down	C05596	pos	28116-23-6	242.1	1.72755	M+H-H2O, M+CH3OH+H, M+Na	C10H11NO4	-	34.6	HMDB0000735	-	-	map00350	Metabolism	Amino acid metabolism	Organic acids and derivatives	Carboxylic acids and derivatives	Amino acids, peptides, and analogues	-	34.6	Tyrosine metabolism	Tyrosine metabolism	1.2292	1.2167	0.9483	0.004692	0.07607	5.0785	4.9365	4.9607	5.2674	5.2951	5.2298
pos_143	3-amino-2-naphthoic acid	metab_141	yes	up	-	pos	-	188.071	1.92117	M+H, M+NH4, M+H-H2O	C11H9NO2	33.2	-	-	-	-	-	-	-	-	-	-	33.2	-	-	-	1.6939	1.679	1.0861	0.0004677	0.02604	6.2772	6.3377	6.2353	5.7158	5.8423	5.7979
pos_161	P-Cresol glucuronide	metab_159	yes	up	-	pos	-	307.079	2.56753	M+H, M+Na, M+H-H2O	C13H16O7	-	49	HMDB0011686	-	-	-	-	-	Organic oxygen compounds	Organooxygen compounds	Carbohydrates and carbohydrate conjugates	-	49	-	-	1.2685	1.2529	1.0827	0.02587	0.1726	3.9641	4.2278	4.1349	3.7155	3.7903	3.8801
pos_171	5-[(2,4,5-trihydroxyphenyl)methyl]oxolan-2-one	metab_169	yes	up	-	pos	-	207.065	3.01817	M+ACN+H, M+ACN+Na, M+H-H2O	C11H12O5	-	55.9	-	-	-	-	-	-	-	-	-	-	55.9	-	-	1.5147	1.5115	1.0832	0.01191	0.116	5.6167	5.6419	5.7355	5.1791	5.1015	5.4096
pos_173	3-O-Caffeoyl-1-O-methylquinic acid	metab_171	yes	up	-	pos	-	369.118	3.0869	M+H-2H2O, M+H, 2M+H	C17H20O9	-	81.9	HMDB0039959	-	-	-	-	-	Organic oxygen compounds	Organooxygen compounds	Alcohols and polyols	-	81.9	-	-	1.306	1.3038	1.0617	0.02503	0.1694	5.7335	5.8252	5.8913	5.4387	5.3561	5.6425
pos_176	Methyl 3-(4-methoxyphenyl)-2-oxopropanoate	metab_174	yes	up	-	pos	-	209.081	3.17693	2M+H, 2M+NH4, M+H	C11H12O4	67.4	-	-	-	-	-	-	-	-	-	-	67.4	-	-	-	1.7504	1.7491	1.124	0.02455	0.1679	5.5131	5.4711	5.52	4.7702	4.6767	5.2337
pos_200	4-Isopropyl-3-cyclohexene-1-carboxylic acid	metab_198	yes	up	-	pos	56424-87-4	201.149	4.24618	M+CH3OH+H, 2M+Na, 2M+NH4	C10H16O2	-	54.2	HMDB0037175	-	-	-	-	-	Lipids and lipid-like molecules	Prenol lipids	Monoterpenoids	-	54.2	-	-	1.4463	1.4421	1.0887	0.00531	0.08011	4.6408	4.6596	4.8442	4.3068	4.3033	4.382
pos_203	7-Epi-12-hydroxyjasmonic acid glucoside	metab_200	yes	up	-	pos	124649-25-8	389.181	4.15628	M+H, M+Na, M+NH4	C18H28O9	-	69.2	HMDB0040706	-	-	-	-	-	Lipids and lipid-like molecules	Fatty Acyls	Fatty acyl glycosides	-	69.2	-	-	3.5535	3.5318	1.8134	1.149e-06	0.0007063	4.8352	4.8183	4.8408	2.6524	2.5927	2.7468
pos_315	LPA(18:2(9Z,12Z)/0:0)	metab_312	yes	up	C00681	pos	-	435.25	7.8336	M+H, M+NH4, M+2Na-H	C21H39O7P	43.3	-	HMDB0007856;LMGP10050017;PW_C003907	-	-	map01100;map00564;map01110;map00561	Metabolism;Metabolism;Metabolism;Metabolism	Global and overview maps;Lipid metabolism;Global and overview maps;Lipid metabolism	Lipids and lipid-like molecules	Glycerophospholipids	Glycerophosphates	43.3	-	Metabolic pathways;Glycerophospholipid metabolism;Biosynthesis of secondary metabolites;Glycerolipid metabolism	Metabolic pathways;Glycerophospholipid metabolism;Biosynthesis of secondary metabolites;Glycerolipid metabolism	1.3743	1.3734	1.1043	0.02889	0.1781	3.9852	3.9738	4.1468	3.7606	3.4551	3.7466
pos_377	Fructoselysine	metab_374	yes	up	C16488	pos	-	309.169	4.15628	M+H, M+Na, M+H-H2O	C12H24N2O7	54.6	-	HMDB0242138;HMDB0252495	-	-	-	-	-	Organic acids and derivatives	Carboxylic acids and derivatives	Amino acids, peptides, and analogues	54.6	-	-	-	1.8707	1.861	1.1797	0.01793	0.1436	4.6594	4.4302	4.204	3.5366	3.9213	3.8108
pos_385	Isorhamnetin-3-O-glucoside	metab_382	yes	up	-	pos	-	501.1	3.40565	M+Na, M+K, M+H	C22H22O12	97.9	-	-	-	-	-	-	-	-	-	-	97.9	-	-	-	2.8256	2.8049	1.5704	7.202e-05	0.00799	3.7204	3.8473	3.7827	2.3196	2.5529	2.3544
pos_395	Yucalexin B'11	metab_391	yes	up	-	pos	119642-80-7	285.185	3.13162	M+H-H2O, M+H, M+H-2H2O	C19H26O3	-	42.1	HMDB0036696	-	-	-	-	-	Organic oxygen compounds	Organooxygen compounds	Alcohols and polyols	-	42.1	-	-	1.3912	1.3933	1.0739	0.01073	0.1112	5.4336	5.2444	5.4057	4.9212	4.9517	5.1043
pos_410	1-O-E-Cinnamoyl-(6-arabinosylglucose)	metab_406	yes	up	-	pos	181373-66-0	460.181	2.68013	M+NH4, M+K, M+H-2H2O	C20H26O11	-	48.5	HMDB0030294	-	-	-	-	-	Phenylpropanoids and polyketides	Cinnamic acids and derivatives	Cinnamic acid esters	-	48.5	-	-	1.6449	1.6248	1.1676	0.00246	0.05485	3.3039	3.4571	3.2275	2.8744	2.8115	2.8687
pos_411	Apigenin 7-xylosyl-(1->2)-glucoside	metab_407	yes	up	-	pos	-	565.155	2.70265	M+H, M+Na, M+H-H2O	C26H28O14	35.1	-	LMPK12110353	-	-	-	-	-	-	-	-	35.1	-	-	-	1.0606	1.0478	1.037	0.007683	0.09705	5.7111	5.8062	5.7413	5.5299	5.6069	5.5065
pos_423	3-O-Caffeoylshikimic acid	metab_419	yes	up	-	pos	6082-44-6	301.07	2.28422	M+H-2H2O, M+CH3OH+H, M+H-H2O	C16H16O8	-	75.7	HMDB0030654	-	-	-	-	-	Phenylpropanoids and polyketides	Cinnamic acids and derivatives	Hydroxycinnamic acids and derivatives	-	75.7	-	-	1.3239	1.3201	1.072	0.02376	0.1655	5.0488	5.1682	5.199	4.7666	4.6616	4.954
pos_425	2-(1-Ethoxyethoxy)propanoic acid	metab_421	yes	up	-	pos	-	163.096	2.24048	M+H, M+NH4, M+H-2H2O	C7H14O4	-	30.7	HMDB0059918	-	-	-	-	-	Organic acids and derivatives	Carboxylic acids and derivatives	Carboxylic acids	-	30.7	-	-	1.2657	1.2565	1.063	0.006198	0.08585	4.8853	4.9793	5.008	4.7188	4.5831	4.6914
pos_428	Gamma-Glu-Leu	metab_424	yes	up	-	pos	2566-39-4	261.144	2.15398	M+H, M+Na, M+H-2H2O	C11H20N2O5	88.3	-	HMDB0011171	-	-	-	-	-	Organic acids and derivatives	Carboxylic acids and derivatives	Amino acids, peptides, and analogues	88.3	-	-	-	1.2259	1.2273	1.0749	0.04914	0.1957	4.5564	4.5198	4.5763	4.1303	4.4582	4.1132
pos_434	Quercetin 3-beta-D-glucoside	metab_430	yes	up	C05623	pos	482-35-9	465.103	1.9002	M+H, M+Na, M+H-H2O	C21H20O12	44.1	-	HMDB0037362	-	-	map01100;map01110;map00944	Metabolism;Metabolism;Metabolism	Global and overview maps;Global and overview maps;Biosynthesis of other secondary metabolites	Phenylpropanoids and polyketides	Flavonoids	Flavonoid glycosides	44.1	-	Metabolic pathways;Biosynthesis of secondary metabolites;Flavone and flavonol biosynthesis	Metabolic pathways;Biosynthesis of secondary metabolites;Flavone and flavonol biosynthesis	2.383	2.3616	1.4076	0.0005023	0.02671	3.2153	3.514	3.4865	2.4029	2.4152	2.4377
pos_826	N-Hydroxy-1-aminonaphthalene	metab_820	yes	up	C14789	pos	607-30-7	160.076	1.604	M+H, M+NH4	C10H9NO	59.7	-	HMDB0062503	-	-	-	-	-	Benzenoids	Naphthalenes	Not Available	59.7	-	-	-	2.1914	2.1911	1.1832	0.004021	0.0693	5.8588	5.4532	5.7166	4.7196	4.6975	4.9727
pos_840	1-Methyladenosine	metab_834	yes	up	C02494	pos	15763-06-1	282.12	1.62473	M+H, M+CH3OH+H	C11H15N5O4	56.3	-	HMDB0243935;HMDB0003331	-	-	-	-	-	Nucleosides, nucleotides, and analogues	Purine nucleosides	Not Available	56.3	-	-	-	1.3363	1.3216	1.0783	0.001069	0.03791	4.2795	4.3495	4.2264	3.956	3.9869	3.9779
pos_856	Pantothenic Acid	metab_850	yes	down	C00864	pos	79-83-4	220.118	1.66558	M+H-H2O, M+H	C9H17NO5	93.9	-	PW_C000136;HMDB0250782;HMDB0000210	Vitamins and cofactors	Vitamins	map01100;map01110;map00770;map00410;map01240	Metabolism;Metabolism;Metabolism;Metabolism;Metabolism	Global and overview maps;Global and overview maps;Metabolism of cofactors and vitamins;Metabolism of other amino acids;Global and overview maps	Organic acids and derivatives	Carboxylic acids and derivatives	Amino acids, peptides, and analogues	93.9	-	Metabolic pathways;Biosynthesis of secondary metabolites;Pantothenate and CoA biosynthesis;beta-Alanine metabolism;Biosynthesis of cofactors	Metabolic pathways;Biosynthesis of secondary metabolites;Pantothenate and CoA biosynthesis;beta-Alanine metabolism;Biosynthesis of cofactors	1.2305	1.2188	0.9574	0.0005474	0.02745	5.9611	5.8801	5.9043	6.1576	6.1862	6.1906
pos_873	4-Hydroxy-3-methoxycinnamaldehyde	metab_867	yes	up	C02666	pos	458-36-6;20649-42-7	179.07	1.70598	M+H, M+NH4	C10H10O3	36.7	-	HMDB0141782	-	-	map01100;map00940;map01110	Metabolism;Metabolism;Metabolism	Global and overview maps;Biosynthesis of other secondary metabolites;Global and overview maps	Benzenoids	Phenols	Methoxyphenols	36.7	-	Metabolic pathways;Phenylpropanoid biosynthesis;Biosynthesis of secondary metabolites	Metabolic pathways;Phenylpropanoid biosynthesis;Biosynthesis of secondary metabolites	2.0965	2.0807	1.1586	0.0003406	0.02185	5.5053	5.6277	5.6066	4.8555	4.707	4.8868
pos_904	4-Hydroxy-5-(3',4'-dihydroxyphenyl)-valeric acid-O-methyl-O-glucuronide	metab_898	yes	up	-	pos	-	452.176	1.79115	M+NH4, M+Na	C18H26O12	-	43.4	HMDB0059972	-	-	-	-	-	Organic oxygen compounds	Organooxygen compounds	Carbohydrates and carbohydrate conjugates	-	43.4	-	-	3.8879	3.8551	20.0431	0.0009841	0.03594	2.1829	3.0087	3.1732	0.1348	0.1381	0.1444
pos_921	Procyanidin C1	metab_915	yes	up	C17624	pos	37064-30-5	867.212	1.83447	M+H, M+Na	C45H38O18	-	41.4	HMDB0038370	-	-	-	-	-	Phenylpropanoids and polyketides	Flavonoids	Biflavonoids and polyflavonoids	-	41.4	-	-	2.7988	2.7823	1.3241	0.0002242	0.01723	5.4654	5.5319	5.6592	4.0918	4.3747	4.1122
pos_965	L-Threo-3-Phenylserine	metab_959	yes	up	C03290	pos	6254-48-4	146.06	1.92117	M+H-2H2O, M+ACN+H	C9H11NO3	-	69.3	HMDB0002184	-	-	-	-	-	Organic acids and derivatives	Carboxylic acids and derivatives	Amino acids, peptides, and analogues	-	69.3	-	-	1.0483	1.0379	1.0391	0.004914	0.07833	5.2792	5.2998	5.2231	5.0152	5.0959	5.0955
pos_988	3,4-Dihydroxybenzaldehyde	metab_982	yes	up	C16700	pos	139-85-5	139.039	2.0689	M+H-H2O, M+H	C7H6O3	39.3	-	HMDB0059965	-	-	map00950	Metabolism	Biosynthesis of other secondary metabolites	Organic oxygen compounds	Organooxygen compounds	Carbonyl compounds	39.3	-	Isoquinoline alkaloid biosynthesis	Isoquinoline alkaloid biosynthesis	1.4622	1.4478	1.1004	0.002428	0.0546	4.059	4.2276	4.2108	3.7884	3.7596	3.8114
pos_1001	Oleuroside	metab_995	yes	up	-	pos	116383-31-4	579.15	2.15398	M+CH3OH+H, M+K	C25H32O13	-	60	HMDB0035352	-	-	-	-	-	Lipids and lipid-like molecules	Prenol lipids	Sesquiterpenoids	-	60	-	-	2.8209	2.8053	1.3664	2.831e-05	0.004351	5.1053	5.0745	5.1793	3.6689	3.7167	3.8561
pos_1003	Butyl 3-O-caffeoylquinate	metab_997	yes	up	-	pos	132741-56-1	393.152	2.17605	M+H-H2O, M+ACN+Na	C20H26O9	-	52.9	HMDB0034588	-	-	-	-	-	Organic oxygen compounds	Organooxygen compounds	Alcohols and polyols	-	52.9	-	-	1.6113	1.5974	1.1167	0.0006813	0.03141	4.3131	4.3745	4.2918	3.797	3.8884	3.9354
pos_1022	Sambucus nigra Degraded cyanogenic glycosides (2'-Epimer)	metab_1016	yes	down	-	pos	-	417.118	2.26277	M+H-H2O, M+ACN+Na	C16H19NO8	-	48.5	HMDB0035502	-	-	-	-	-	Organic oxygen compounds	Organooxygen compounds	Carbohydrates and carbohydrate conjugates	-	48.5	-	-	1.3495	1.3283	0.8749	0.02769	0.1781	2.4454	2.336	2.69	2.8321	2.8663	2.8402
pos_1025	1-Oxo-1H-2-benzopyran-3-carboxaldehyde	metab_1019	yes	up	-	pos	34328-51-3	207.065	2.28422	M+H, M+CH3OH+H	C10H6O3	59.1	-	HMDB0030577	-	-	-	-	-	Phenylpropanoids and polyketides	Isocoumarins and derivatives	Not Available	59.1	-	-	-	1.479	1.476	1.0816	0.02043	0.1534	5.5914	5.668	5.7169	5.195	5.0653	5.4361
pos_1029	1-O-Sinapoylglucose	metab_1023	yes	up	-	pos	-	387.128	2.28422	M+H, M+NH4	C17H22O10	45.2	-	HMDB0041175	-	-	-	-	-	Phenylpropanoids and polyketides	Cinnamic acids and derivatives	Hydroxycinnamic acids and derivatives	45.2	-	-	-	1.4852	1.479	1.1023	0.01535	0.1332	4.4636	4.5742	4.5758	4.0754	3.9735	4.3013
pos_1057	Gly Val Leu	metab_1051	yes	up	-	pos	-	288.192	2.3692	M+H, M+Na	C13H25N3O4	40.4	-	-	-	-	-	-	-	-	-	-	40.4	-	-	-	1.3487	1.3369	1.1039	0.03915	0.1781	3.8127	4.0006	3.9134	3.552	3.7237	3.346
pos_1069	2-[2,4,6-trihydroxy-3-(3-methylbut-2-en-1-yl)phenyl]acetic acid	metab_1063	yes	up	-	pos	-	235.096	2.47772	M+H-H2O, M+NH4	C13H16O5	-	53.5	-	-	-	-	-	-	-	-	-	-	53.5	-	-	1.33	1.3147	1.0978	0.002953	0.06018	3.4511	3.5957	3.5287	3.2598	3.1784	3.1945
pos_1073	(S)-Edulinine	metab_1067	yes	up	-	pos	27495-36-9	330.11	2.5	M+K, M+ACN+Na	C16H21NO4	-	74.2	HMDB0030178	-	-	-	-	-	Organoheterocyclic compounds	Quinolines and derivatives	Quinolones and derivatives	-	74.2	-	-	2.6674	2.647	1.464	0.002612	0.05601	3.9438	4.1454	3.9212	2.5972	2.5223	3.0841
pos_1127	(7'x,8'x)-4,7'-Epoxy-3,8'-bilign-7-ene-3,5'-dimethoxy-4',9,9'-triol	metab_1121	yes	up	-	pos	-	359.149	2.72525	M+H-2H2O, M+H	C20H22O6	37.1	-	HMDB0041276	-	-	-	-	-	Phenylpropanoids and polyketides	2-arylbenzofuran flavonoids	Not Available	37.1	-	-	-	2.4682	2.4452	1.4759	0.009484	0.1054	3.2626	3.6922	3.5018	2.5409	2.5931	1.9514
pos_1141	5-O-Methylvisamminol	metab_1135	yes	up	C09016	pos	80681-42-1	273.112	2.77025	M+H-H2O, M+H	C16H18O5	31.5	-	LMPK13110002	-	-	-	-	-	-	-	-	31.5	-	-	-	1.7778	1.7546	1.2259	0.01156	0.115	2.99	3.3936	3.142	2.5425	2.5151	2.711
pos_1162	1-Methylestra-1,3,5(10),6-tetraene-3,17beta-diol	metab_1155	yes	up	C15255	pos	-	285.185	2.81553	M+H, M+NH4	C19H24O2	62.8	-	-	-	-	-	-	-	-	-	-	62.8	-	-	-	1.031	1.0369	1.051	0.04335	0.1808	4.7306	4.5472	4.703	4.3449	4.4298	4.5269
pos_1181	Nafenopin	metab_1174	yes	up	C11371	pos	3771-19-5	311.164	2.90442	M+H-H2O, M+H	C20H22O3	43.2	-	HMDB0255421	-	-	-	-	-	Benzenoids	Benzene and substituted derivatives	Phenoxyacetic acid derivatives	43.2	-	-	-	1.2533	1.2637	1.0764	0.03847	0.1781	4.7952	4.4736	4.6304	4.2069	4.4004	4.3043
pos_1207	Echinone	metab_1200	yes	up	C10338	pos	80348-65-8	345.133	2.99538	M+H-H2O, M+H	C19H20O6	36.1	-	-	-	-	-	-	-	-	-	-	36.1	-	-	-	1.6296	1.6105	1.1551	0.02708	0.1758	3.6953	3.9967	3.97	3.1487	3.5599	3.3865
pos_1233	3-Methoxy-4-hydroxyphenylethylene glycol	metab_1226	yes	up	-	pos	-	167.07	3.10927	M+H-H2O, 2M+H	C9H12O4	48.8	-	-	-	-	-	-	-	-	-	-	48.8	-	-	-	1.2612	1.2525	1.0743	0.001651	0.04614	4.0472	4.0982	4.0912	3.7744	3.7537	3.8636
pos_1242	Cortisol	metab_1235	yes	up	C00735	pos	50-23-7	380.243	3.13162	M+NH4, M+K	C21H30O5	-	56.2	HMDB0000063;LMST02030001;PW_C000045	Steroids;Hormones and transmitters	21-Carbon atoms;Steroid hormones	map01100	Metabolism	Global and overview maps	Lipids and lipid-like molecules	Steroids and steroid derivatives	Hydroxysteroids	-	56.2	Metabolic pathways	Metabolic pathways	1.2073	1.216	1.0579	0.01954	0.1506	5.4009	5.146	5.3365	4.9964	5.0057	5.0132
pos_1269	4-hydroxy-7-methyl-5H-furo[2,3-g]isochromen-5-one	metab_1262	yes	up	-	pos	-	249.076	3.24553	M+H, M+CH3OH+H	C12H8O4	-	33.6	-	-	-	-	-	-	-	-	-	-	33.6	-	-	1.9	1.9	1.1941	0.02088	0.1554	4.398	4.2638	4.4426	3.447	3.5009	4.0253
pos_1293	Clavirin I	metab_1286	yes	up	-	pos	-	291.159	3.33705	M+H-H2O, M+H	C17H22O4	41.1	-	LMFA03120025	-	-	-	-	-	-	-	-	41.1	-	-	-	2.5051	2.4773	1.3455	0.000902	0.03578	4.1305	4.4884	4.141	3.1726	3.0898	3.2193
pos_1299	3,4,5-trihydroxy-6-[(4-oxo-2-phenyl-4H-chromen-3-yl)oxy]oxane-2-carboxylic acid	metab_1292	yes	up	-	pos	-	447.128	3.36	M+H, M+CH3OH+H	C21H18O9	-	40.4	-	-	-	-	-	-	-	-	-	-	40.4	-	-	1.9971	1.9812	1.344	0.0002707	0.01977	2.7065	2.757	2.6377	1.9577	1.97	2.1005
pos_1310	4-hydroxy-5-(4-hydroxy-3-methoxyphenyl)pentanoic acid	metab_1303	yes	up	-	pos	-	263.091	3.40565	M+H, M+Na	C12H16O5	-	43.8	-	-	-	-	-	-	-	-	-	-	43.8	-	-	1.4264	1.4136	1.0941	0.001862	0.04855	4.1376	4.2424	4.1777	3.7939	3.7822	3.9033
pos_1321	6-(4-ethenyl-3-hydroxyphenoxy)-3,4,5-trihydroxyoxane-2-carboxylic acid	metab_1314	yes	up	-	pos	-	313.092	3.47398	M+H-H2O, M+H	C14H16O8	-	35	-	-	-	-	-	-	-	-	-	-	35	-	-	1.6333	1.6155	1.1404	0.005734	0.08213	3.7573	4.0089	4.0006	3.4236	3.5059	3.3872
pos_1327	Lirioresinol A	metab_1320	yes	up	-	pos	21453-71-4	419.17	3.49672	M+H-2H2O, M+H	C22H26O8	40.2	-	HMDB0038928	-	-	-	-	-	Lignans, neolignans and related compounds	Furanoid lignans	Not Available	40.2	-	-	-	2.068	2.0681	1.2236	0.03285	0.1781	4.7408	4.7277	4.7959	3.8342	3.4447	4.3781
pos_1381	5-Deoxykievitol	metab_1374	yes	up	-	pos	104380-54-3	357.133	3.76948	M+H-H2O, M+H	C20H20O6	38.1	-	HMDB0038774;LMPK12050460	-	-	-	-	-	Phenylpropanoids and polyketides	Isoflavonoids	Isoflavans	38.1	-	-	-	1.7005	1.6902	1.1619	0.01001	0.1079	3.7685	3.8909	3.9856	3.1514	3.3856	3.4864
pos_1440	Idebenone	metab_1433	yes	up	-	pos	-	361.199	4.17895	M+H, M+Na	C19H30O5	62.6	-	HMDB0253376	-	-	-	-	-	Not Available	Not Available	Not Available	62.6	-	-	-	1.1476	1.1446	1.0634	0.008548	0.1011	4.2227	4.1079	4.0974	3.8405	3.8985	3.9503
pos_1452	Testolic acid	metab_1445	yes	up	C01618	pos	-	321.206	4.29172	M+H, M+Na	C19H28O4	70.8	-	LMST02020081	-	-	-	-	-	-	-	-	70.8	-	-	-	1.507	1.5041	1.0957	0.0118	0.1156	5.0843	4.873	4.886	4.3852	4.5352	4.6279
pos_1668	15-Hydroxyleptocarpin	metab_1661	yes	up	-	pos	121541-07-9	401.158	2.95002	M+H-2H2O, M+Na	C20H26O7	-	55	HMDB0036694	-	-	-	-	-	Lipids and lipid-like molecules	Prenol lipids	Terpene lactones	-	55	-	-	1.9796	1.9658	1.1693	0.0002361	0.01777	4.6477	4.7164	4.7228	3.9275	4.0246	4.0959
pos_1739	3,4,5-trihydroxy-6-[3-(2-phenylcyclobutyl)phenoxy]oxane-2-carboxylic acid	metab_1732	yes	up	-	pos	-	401.16	2.5	M+H-H2O, M+H	C22H24O7	-	30.2	-	-	-	-	-	-	-	-	-	-	30.2	-	-	2.9272	2.9041	1.4081	0.0005715	0.02795	5.034	5.2921	5.1389	3.6406	3.4474	3.8961
pos_1747	C17 Sphinganine	metab_1740	yes	down	-	pos	-	288.29	6.9634	M+H-H2O, M+H	C17H37NO2	42.8	-	LMSP01040003	-	-	-	-	-	-	-	-	42.8	-	-	-	1.3968	1.3804	0.889	0.02861	0.1781	3.1787	2.9693	3.0745	3.2851	3.4672	3.6223
pos_1814	PC(16:1/0:0)	metab_1807	yes	down	-	pos	-	494.324	7.37612	M+H, M+Na	C24H48NO7P	83.1	-	LMGP01050021	-	-	-	-	-	-	-	-	83.1	-	-	-	1.1537	1.14	0.9574	0.002468	0.05485	5.3	5.2206	5.3169	5.4834	5.5456	5.5145
pos_1876	15(S)-Hydroxyeicosatrienoic acid	metab_1869	yes	down	-	pos	13-16-1	355.284	7.85582	M+H-H2O, M+CH3OH+H	C20H34O3	-	74.5	HMDB0005045	-	-	-	-	-	Lipids and lipid-like molecules	Fatty Acyls	Eicosanoids	-	74.5	-	-	1.4977	1.4903	0.9164	0.02213	0.1609	4.8762	4.8474	4.7493	5.0399	5.4196	5.3337
pos_1886	Palmitic acid	metab_1879	yes	down	C00249	pos	1957-10-03	239.237	7.91952	M+H-H2O, M+H	C16H32O2	-	30.8	HMDB0303203;HMDB0000220;LMFA01010001;PW_C000145	Lipids	Fatty acids	map01100;map00071;map01212;map00073;map00061;map00062;map01040	Metabolism;Metabolism;Metabolism;Metabolism;Metabolism;Metabolism;Metabolism	Global and overview maps;Lipid metabolism;Global and overview maps;Lipid metabolism;Lipid metabolism;Lipid metabolism;Lipid metabolism	Lipids and lipid-like molecules	Fatty Acyls	Fatty acids and conjugates	-	30.8	Metabolic pathways;Fatty acid degradation;Fatty acid metabolism;Cutin, suberine and wax biosynthesis;Fatty acid biosynthesis;Fatty acid elongation;Biosynthesis of unsaturated fatty acids	Metabolic pathways;Fatty acid degradation;Fatty acid metabolism;Cutin, suberine and wax biosynthesis;Fatty acid biosynthesis;Fatty acid elongation;Biosynthesis of unsaturated fatty acids	2.3655	2.352	0.7853	0.001134	0.03918	3.6882	3.6348	3.5099	4.3895	4.7349	4.6709
pos_1925	Thr Ala Leu Glu	metab_1918	yes	up	-	pos	-	433.232	8.30415	M+H, M+Na	C18H32N4O8	49.7	-	-	-	-	-	-	-	-	-	-	49.7	-	-	-	1.4628	1.444	1.117	0.005775	0.0824	3.6774	3.7908	3.5642	3.2526	3.3493	3.2727
pos_1995	LysoPE(18:3(6Z,9Z,12Z)/0:0)	metab_1988	yes	down	-	pos	-	476.274	8.88288	M+H, M+Na	C23H42NO7P	37.4	-	HMDB0011508	-	-	-	-	-	Lipids and lipid-like molecules	Glycerophospholipids	Glycerophosphoethanolamines	37.4	-	-	-	1.2546	1.2426	0.9476	0.00323	0.06297	5.1055	5.043	5.1072	5.2883	5.4126	5.3982
pos_2004	Ethyltestosterone	metab_1997	yes	down	-	pos	1235-97-8	349.273	8.96722	M+CH3OH+H, 2M+K	C21H32O2	-	50.5	HMDB0006002;LMST02030201	-	-	-	-	-	Lipids and lipid-like molecules	Steroids and steroid derivatives	Pregnane steroids	-	50.5	-	-	1.9828	1.9619	0.8318	0.0221	0.1609	4.1282	3.6082	3.5696	4.3413	4.7141	4.5377
pos_2123	DGDG(16:0/18:2)	metab_2116	yes	down	-	pos	-	934.645	9.83962	M+NH4, M+Na	C49H88O15	72.9	-	-	-	-	-	-	-	-	-	-	72.9	-	-	-	1.3338	1.3276	0.927	0.04456	0.184	4.6533	4.739	4.7864	4.8985	5.3218	5.0751
pos_2135	Cer(d16:1(4E)/20:0(2OH))	metab_2128	yes	up	-	pos	-	582.545	10.097	M+H-H2O, M+H	C36H71NO4	43.2	-	LMSP02010084	-	-	-	-	-	-	-	-	43.2	-	-	-	1.7159	1.6997	1.1622	0.007726	0.09742	3.8779	3.9593	3.7935	3.5054	3.1656	3.3367
pos_2175	Leu Asp Ala	metab_2168	yes	up	-	pos	-	318.166	1.64665	M+H, M+Na	C13H23N3O6	50	-	-	-	-	-	-	-	-	-	-	50	-	-	-	1.1311	1.1248	1.0616	0.001374	0.04251	3.9015	3.9032	3.9245	3.6372	3.7327	3.6804
pos_2452	4-Pyrimidine Methanamine (hydrochloride)	metab_2445	yes	up	-	pos	-	110.072	0.61585	M+H	C5H7N3	54	-	-	-	-	-	-	-	-	-	-	54	-	-	-	1.1439	1.1461	1.0624	0.0323	0.1781	4.629	4.4839	4.6239	4.1752	4.358	4.3979
pos_2463	Histidinal	metab_2456	yes	down	C01929	pos	23784-15-8	122.071	0.6338	M+H-H2O	C6H9N3O	-	54.6	HMDB0012234	-	-	map01100;map00340;map01110	Metabolism;Metabolism;Metabolism	Global and overview maps;Amino acid metabolism;Global and overview maps	Organic nitrogen compounds	Organonitrogen compounds	Amines	-	54.6	Metabolic pathways;Histidine metabolism;Biosynthesis of secondary metabolites	Metabolic pathways;Histidine metabolism;Biosynthesis of secondary metabolites	1.4529	1.4344	0.9194	0.004874	0.07817	4.3948	4.2043	4.3333	4.6653	4.6412	4.7619
pos_2469	Thiamine	metab_2462	yes	down	C00378	pos	70-16-6;59-43-8	265.112	0.6338	M+H	C12H16N4OS	60.6	-	HMDB0302835;HMDB0000235;PW_C000158;HMDB0303167	Vitamins and cofactors	Vitamins	map01100;map00730;map04122;map02010;map01240	Metabolism;Metabolism;Genetic Information Processing;Environmental Information Processing;Metabolism	Global and overview maps;Metabolism of cofactors and vitamins;Folding, sorting and degradation;Membrane transport;Global and overview maps	Organoheterocyclic compounds	Diazines	Pyrimidines and pyrimidine derivatives	60.6	-	Metabolic pathways;Thiamine metabolism;Sulfur relay system;ABC transporters;Biosynthesis of cofactors	Metabolic pathways;Thiamine metabolism;Sulfur relay system;ABC transporters;Biosynthesis of cofactors	1.5538	1.532	0.9092	0.006361	0.08647	4.4916	4.2267	4.3854	4.8116	4.7454	4.8552
pos_2552	Niacinamide	metab_2545	yes	down	C00153	pos	98-92-0	123.055	0.957567	M+H	C6H6N2O	62	-	HMDB0001406;PW_C001086	Vitamins and cofactors	Vitamins	map01100;map00760;map01240	Metabolism;Metabolism;Metabolism	Global and overview maps;Metabolism of cofactors and vitamins;Global and overview maps	Organoheterocyclic compounds	Pyridines and derivatives	Pyridinecarboxylic acids and derivatives	62	-	Metabolic pathways;Nicotinate and nicotinamide metabolism;Biosynthesis of cofactors	Metabolic pathways;Nicotinate and nicotinamide metabolism;Biosynthesis of cofactors	1.0362	1.0433	0.9463	0.04473	0.1843	3.8927	3.9722	3.9698	4.1766	4.0388	4.2919
pos_2573	4-Acetamido-2-aminobutanoic acid	metab_2566	yes	up	C06442	pos	1190-46-1	125.071	1.00018	M+H-2H2O	C6H12N2O3	-	62	HMDB0031411	-	-	map01100;map00260	Metabolism;Metabolism	Global and overview maps;Amino acid metabolism	Organic acids and derivatives	Carboxylic acids and derivatives	Amino acids, peptides, and analogues	-	62	Metabolic pathways;Glycine, serine and threonine metabolism	Metabolic pathways;Glycine, serine and threonine metabolism	1.9061	1.8945	1.1848	3.264e-06	0.001338	3.9855	3.9895	4.0114	3.3416	3.3864	3.3865
pos_2672	Ser Val	metab_2665	yes	down	-	pos	-	205.118	1.4401	M+H	C8H16N2O4	61.9	-	-	-	-	-	-	-	-	-	-	61.9	-	-	-	1.2728	1.2635	0.9325	0.000336	0.02177	3.9169	3.8723	3.8624	4.1986	4.1612	4.1363
pos_2705	3-Indolebutyric acid	metab_2698	yes	down	C11284	pos	133-32-4	221.128	1.56168	M+NH4	C12H13NO2	-	53.2	HMDB0002096	-	-	-	-	-	Organoheterocyclic compounds	Indoles and derivatives	Indoles	-	53.2	-	-	4.0235	3.9914	0.4476	0.0001268	0.01215	2.1142	2.0297	2.6381	5.0534	5.0297	5.0693
pos_2749	PC(4:0/0:0)	metab_2742	yes	up	-	pos	-	328.151	1.68488	M+H	C12H26NO7P	69.2	-	LMGP01050061	-	-	-	-	-	-	-	-	69.2	-	-	-	1.4827	1.4644	1.125	0.04244	0.1788	3.811	4.1572	4.152	3.5959	3.7637	3.4135
pos_2775	Okanin	metab_2768	yes	up	C08724	pos	484-76-4	289.071	1.76857	M+H	C15H12O6	68.5	-	LMPK12120181;HMDB0245776	-	-	-	-	-	Phenylpropanoids and polyketides	Linear 1,3-diarylpropanoids	Chalcones and dihydrochalcones	68.5	-	-	-	3.9195	3.8948	2.4751	0.0001939	0.01544	4.384	4.4886	4.5211	1.5891	2.2001	1.6232
pos_2857	Polygonolide	metab_2850	yes	up	C09963	pos	100560-66-5	221.081	2.04663	M+H	C12H12O4	46.2	-	-	-	-	-	-	-	-	-	-	46.2	-	-	-	1.8575	1.8361	1.2299	0.01061	0.1107	3.1712	3.6062	3.4769	2.7204	2.7237	2.894
pos_2867	Trans-Zeatin-riboside	metab_2860	yes	up	-	pos	-	352.161	2.08933	M+H	C15H21N5O5	60.4	-	-	-	-	-	-	-	-	-	-	60.4	-	-	-	2.7952	2.7737	1.6553	1.655e-05	0.003336	3.2875	3.462	3.4069	2.0271	2.0257	2.0823
pos_2903	Hydroxyprolyl-Tyrosine	metab_2896	yes	down	-	pos	-	259.108	2.28422	M+H-2H2O	C14H18N2O5	-	45.6	HMDB0028875	-	-	-	-	-	Organic acids and derivatives	Carboxylic acids and derivatives	Amino acids, peptides, and analogues	-	45.6	-	-	3.9566	3.9192	0.4045	0.0003007	0.02073	2.1221	1.4676	1.9244	4.322	4.7529	4.5566
pos_2917	Quercetin 3,7-dimethyl ether 5-glucoside	metab_2910	yes	up	-	pos	128388-46-5	493.134	2.32748	M+H	C23H24O12	56	-	HMDB0039336;LMPK12112710	-	-	-	-	-	Phenylpropanoids and polyketides	Flavonoids	Flavonoid glycosides	56	-	-	-	1.1256	1.1144	1.067	0.02338	0.1644	3.8297	3.9842	3.993	3.7636	3.6098	3.6926
pos_2918	Stachyoside A	metab_2911	yes	up	-	pos	131862-10-7	571.163	2.32748	M+2Na-H	C21H34O15	-	73	HMDB0039092	-	-	-	-	-	Lipids and lipid-like molecules	Prenol lipids	Terpene glycosides	-	73	-	-	1.3307	1.3273	1.0642	0.02213	0.1609	5.6868	5.7548	5.7645	5.368	5.2398	5.5577
pos_2927	13-Hydroxy-5'-O-methylmelledonal	metab_2920	yes	up	-	pos	112471-06-4	480.223	2.3692	M+NH4	C24H30O9	-	76.7	HMDB0035864	-	-	-	-	-	Lipids and lipid-like molecules	Prenol lipids	Sesquiterpenoids	-	76.7	-	-	3.7271	3.7007	1.8904	3.303e-05	0.004694	5.0408	5.1628	5.0136	2.57	2.5824	2.8963
pos_2941	Vitisin B	metab_2934	yes	up	-	pos	-	581.151	2.41213	M+ACN+Na	C25H25O12+	-	57.6	HMDB0036825	-	-	-	-	-	Organoheterocyclic compounds	Pyrrolidines	Phenylpyrrolidines	-	57.6	-	-	2.4603	2.4409	1.267	0.001269	0.04162	4.9664	5.1453	5.0618	3.7759	4.0051	4.1952
pos_2949	Estriol-16-Glucuronide	metab_2942	yes	up	C05504	pos	1852-50-2	482.238	2.43397	M+NH4	C24H32O9	-	56.7	HMDB0006766	-	-	-	-	-	Lipids and lipid-like molecules	Steroids and steroid derivatives	Steroidal glycosides	-	56.7	-	-	2.3721	2.3585	1.2425	5.516e-05	0.006782	5.0082	4.9623	4.9395	4.0941	3.979	3.9255
pos_2984	Demethylsulochrin	metab_2977	yes	down	C15504	pos	-	319.081	2.58998	M+H	C16H14O7	59.1	-	-	-	-	-	-	-	-	-	-	59.1	-	-	-	2.3755	2.3687	0.7458	0.0002959	0.02069	2.8824	3.0441	2.7717	3.8471	3.94	3.8743
pos_3005	Vanillylmandelic acid	metab_2998	yes	up	C05584	pos	13244-77-4;55-10-7	181.05	2.68013	M+H-H2O	C9H10O5	36.1	-	HMDB0304531;HMDB0000291;HMDB0254548;PW_C000197	-	-	map01100;map00350	Metabolism;Metabolism	Global and overview maps;Amino acid metabolism	Benzenoids	Phenols	Methoxyphenols	36.1	-	Metabolic pathways;Tyrosine metabolism	Metabolic pathways;Tyrosine metabolism	1.2262	1.2181	1.0701	0.0008275	0.03463	3.9979	4.0359	4.0525	3.7316	3.751	3.8121
pos_3022	(E)-1-O-Cinnamoyl-beta-D-glucose	metab_3015	yes	up	-	pos	40004-96-4	621.216	2.72525	2M+H	C15H18O7	-	60	HMDB0030293	-	-	-	-	-	Phenylpropanoids and polyketides	Cinnamic acids and derivatives	Cinnamic acid esters	-	60	-	-	2.4851	2.4637	1.2764	0.0007172	0.03206	4.8677	5.1076	4.9582	3.9325	3.729	4.0393
pos_3030	Blumealactone A	metab_3023	yes	down	-	pos	111545-46-1	428.205	2.74753	M+ACN+Na	C20H28O6	-	65	HMDB0036665	-	-	-	-	-	Lipids and lipid-like molecules	Prenol lipids	Monoterpenoids	-	65	-	-	1.518	1.5145	0.8781	0.007408	0.09507	3.0836	3.1273	3.0372	3.5946	3.5898	3.3483
pos_3050	Apigenin 7-[rhamnosyl-(1->2)-galacturonide]	metab_3043	yes	up	-	pos	124167-97-1	625.175	2.79292	M+CH3OH+H	C27H28O15	-	43.5	HMDB0038847	-	-	-	-	-	Phenylpropanoids and polyketides	Flavonoids	Flavonoid glycosides	-	43.5	-	-	1.597	1.5836	1.1013	0.0304	0.1781	5.3361	5.654	5.5524	5.1117	4.7627	5.1472
pos_3058	(+)-Galbacin	metab_3051	yes	up	C10616	pos	61891-31-4	341.138	2.83688	M+H	C20H20O5	40.7	-	-	-	-	-	-	-	-	-	-	40.7	-	-	-	1.6248	1.6097	1.1329	0.001542	0.04503	3.8452	4.0179	4.0278	3.499	3.5193	3.4778
pos_3059	7-Deoxyloganate	metab_3052	yes	up	C11636	pos	-	361.147	2.83688	M+H	C16H24O9	33.3	-	-	-	-	map01110;map00902	Metabolism;Metabolism	Global and overview maps;Metabolism of terpenoids and polyketides	-	-	-	33.3	-	Biosynthesis of secondary metabolites;Monoterpenoid biosynthesis	Biosynthesis of secondary metabolites;Monoterpenoid biosynthesis	1.3058	1.2969	1.0802	0.01829	0.1457	4.3165	4.4763	4.4195	4.0582	3.9648	4.2082
pos_3090	(3xi,6E)-1,7-Diphenyl-6-hepten-3-ol	metab_3083	yes	up	-	pos	87095-76-9	267.174	2.92713	M+H	C19H22O	43.9	-	HMDB0030146	-	-	-	-	-	Phenylpropanoids and polyketides	Diarylheptanoids	Linear diarylheptanoids	43.9	-	-	-	1.2281	1.2332	1.0735	0.02394	0.1661	4.5163	4.3089	4.4996	4.0484	4.132	4.2346
pos_3159	(+)-cis-5,6-Dihydro-5-hydroxy-4-methoxy-6-(2-phenylethyl)-2H-pyran-2-one	metab_3152	yes	up	-	pos	52247-81-1	249.112	3.17693	M+H	C14H16O4	37.2	-	HMDB0029575	-	-	-	-	-	Phenylpropanoids and polyketides	Kavalactones	Not Available	37.2	-	-	-	2.0432	2.047	1.1792	0.04632	0.1887	5.8442	5.7301	5.8166	4.8628	4.4124	5.4723
pos_3173	Acteoside	metab_3166	yes	up	C10501	pos	61276-17-3	669.181	3.2	M+2Na-H	C29H36O15	-	49.8	HMDB0259785;HMDB0034843	-	-	-	-	-	Phenylpropanoids and polyketides	Cinnamic acids and derivatives	Hydroxycinnamic acids and derivatives	-	49.8	-	-	2.096	2.0787	1.2479	0.01739	0.1417	3.9992	4.4164	4.2549	3.4943	3.0379	3.6205
pos_3177	Oenin	metab_3170	yes	up	C12140	pos	30113-37-2;7228-78-6	493.134	3.22275	M+H	C23H24O12	86	-	HMDB0038010;HMDB0030777;LMPK12010372	-	-	map00942	Metabolism	Biosynthesis of other secondary metabolites	Phenylpropanoids and polyketides	Flavonoids	Flavonoid glycosides	86	-	Anthocyanin biosynthesis	Anthocyanin biosynthesis	1.2946	1.2818	1.0664	0.002573	0.05601	4.7041	4.8371	4.8123	4.4799	4.4609	4.5198
pos_3202	Neobanone	metab_3195	yes	up	-	pos	-	383.112	3.3141	M+H	C21H18O7	34.5	-	LMPK12060036	-	-	-	-	-	-	-	-	34.5	-	-	-	1.7774	1.7606	1.2588	0.03292	0.1781	3.0898	3.2466	2.8863	2.1831	2.3852	2.7567
pos_3204	Persiconin	metab_3197	yes	up	-	pos	28978-03-2	443.133	3.3141	M+H-2H2O	C23H26O11	-	84	HMDB0037482;LMPK12140586	-	-	-	-	-	Phenylpropanoids and polyketides	Flavonoids	Flavonoid glycosides	-	84	-	-	2.2628	2.2407	1.2856	0.001182	0.03982	3.8853	4.1859	4.0534	3.0302	3.1462	3.2569
pos_3218	Benzylmalic acid	metab_3211	yes	up	-	pos	-	225.076	3.36	M+H	C11H12O5	49.1	-	-	-	-	-	-	-	-	-	-	49.1	-	-	-	1.1029	1.1027	1.0606	0.03216	0.1781	4.2409	4.3028	4.3661	4.0155	3.9669	4.1886
pos_3265	4-OH-Retinal	metab_3258	yes	up	-	pos	-	283.206	3.54203	M+H-H2O	C20H28O2	-	48.7	HMDB0012788	-	-	-	-	-	Lipids and lipid-like molecules	Prenol lipids	Retinoids	-	48.7	-	-	1.0609	1.0669	1.0537	0.02719	0.1762	4.5828	4.3832	4.5223	4.2192	4.2532	4.3285
pos_3293	Trans-o-Coumaric acid 2-glucoside	metab_3286	yes	up	C05158	pos	618-67-7	309.097	3.65617	M+H-H2O	C15H18O8	-	87.3	HMDB0033581	-	-	map00940;map01110	Metabolism;Metabolism	Biosynthesis of other secondary metabolites;Global and overview maps	Organic oxygen compounds	Organooxygen compounds	Carbohydrates and carbohydrate conjugates	-	87.3	Phenylpropanoid biosynthesis;Biosynthesis of secondary metabolites	Phenylpropanoid biosynthesis;Biosynthesis of secondary metabolites	2.1048	2.0946	1.3574	0.001618	0.04607	2.9067	2.9609	3.1111	2.1152	2.1276	2.3728
pos_3424	7-keto DHEA	metab_3417	yes	up	-	pos	-	303.195	4.38253	M+H	C19H26O3	76.8	-	-	-	-	-	-	-	-	-	-	76.8	-	-	-	1.2927	1.2937	1.075	0.0226	0.1623	4.8806	4.6678	4.7252	4.3368	4.3837	4.5561
pos_3486	12(S)-HPETE	metab_3479	yes	up	C05965	pos	67675-13-2;71774-10-2	359.219	4.81433	M+Na	C20H32O4	-	48.1	HMDB0004243;PW_C002105	-	-	map00590;map01100	Metabolism;Metabolism	Lipid metabolism;Global and overview maps	Lipids and lipid-like molecules	Fatty Acyls	Eicosanoids	-	48.1	Arachidonic acid metabolism;Metabolic pathways	Arachidonic acid metabolism;Metabolic pathways	2.5197	2.5261	1.446	0.02611	0.173	4.5365	3.737	4.1777	2.67	2.4971	3.4427
pos_3883	Ciprostene	metab_3876	yes	down	-	pos	-	365.268	7.2911	M+H	C22H36O4	62.9	-	HMDB0250270	-	-	-	-	-	Lipids and lipid-like molecules	Fatty Acyls	Eicosanoids	62.9	-	-	-	2.0836	2.0624	0.8364	0.00173	0.04674	4.1026	3.7882	3.842	4.6094	4.7063	4.7114
pos_3954	Goshonoside F2	metab_3947	yes	down	-	pos	90851-25-5	517.337	7.59252	M+CH3OH+H	C26H44O8	-	65.7	HMDB0038540	-	-	-	-	-	Lipids and lipid-like molecules	Prenol lipids	Terpene glycosides	-	65.7	-	-	2.0464	2.0264	0.8197	0.01019	0.1085	3.6397	3.4138	3.5606	4.023	4.5578	4.3678
pos_3956	S-(11-hydroxy-9-deoxy-delta12-PGD2)-glutathione	metab_3949	yes	down	-	pos	-	610.309	7.59252	M+H-2H2O	C30H51N3O10S	-	34.4	HMDB0013055	-	-	-	-	-	Organic acids and derivatives	Carboxylic acids and derivatives	Amino acids, peptides, and analogues	-	34.4	-	-	1.0298	1.0108	0.9594	0.03343	0.1781	5.072	4.8444	4.9642	5.1665	5.1688	5.1734
pos_4062	1-Monopalmitin	metab_4055	yes	down	-	pos	32899-41-5	331.284	8.24047	M+H	C19H38O4	98	-	HMDB0245964;HMDB0011564	-	-	-	-	-	Lipids and lipid-like molecules	Glycerolipids	Monoradylglycerols	98	-	-	-	1.7651	1.7547	0.9033	0.0007623	0.03347	5.1331	5.1168	5.0772	5.5448	5.7321	5.6905
pos_4078	Tauroursodeoxycholic acid	metab_4071	yes	down	C16868	pos	14605-22-2	541.335	8.34655	M+ACN+H	C26H45NO6S	-	65.5	LMST05040015;HMDB0000874	-	-	-	-	-	Lipids and lipid-like molecules	Steroids and steroid derivatives	Bile acids, alcohols and derivatives	-	65.5	-	-	1.699	1.6885	0.8971	0.009757	0.1071	4.7481	4.6979	4.6486	5.0249	5.4086	5.2785
pos_4208	Jimenezin	metab_4201	yes	up	-	pos	204185-17-1	664.513	9.09357	M+ACN+H	C37H66O7	-	69	HMDB0032088	-	-	-	-	-	Lipids and lipid-like molecules	Fatty Acyls	Fatty alcohols	-	69	-	-	1.1546	1.1605	1.0612	0.02796	0.1781	4.7295	4.5771	4.6774	4.519	4.3611	4.2967
pos_4213	Mactraxanthin	metab_4206	yes	up	-	pos	86105-69-3	669.47	9.11545	M+CH3OH+H	C40H60O6	-	53	HMDB0036928	-	-	-	-	-	Lipids and lipid-like molecules	Prenol lipids	Tetraterpenoids	-	53	-	-	1.0822	1.0685	1.0419	0.02434	0.1672	5.6674	5.7243	5.5344	5.4182	5.4677	5.36
pos_4230	Alpha-Amyrone	metab_4223	yes	down	-	pos	638-96-0	425.377	9.22197	M+H	C30H48O	52.7	-	HMDB0036659	-	-	-	-	-	Lipids and lipid-like molecules	Prenol lipids	Triterpenoids	52.7	-	-	-	1.423	1.4168	0.9327	0.002102	0.05168	4.9306	5.0179	5.0739	5.4056	5.3105	5.3891
pos_4236	PE(16:0/P-18:1(11Z))	metab_4229	yes	up	-	pos	-	666.529	9.28592	M+H-2H2O	C39H76NO7P	-	33.2	HMDB0008951	-	-	-	-	-	Lipids and lipid-like molecules	Glycerophospholipids	Glycerophosphoethanolamines	-	33.2	-	-	1.133	1.1241	1.0477	0.01898	0.1487	5.3992	5.4608	5.3628	5.1688	5.2588	5.059
pos_4904	GPCho(18:1/18:2)	metab_4897	yes	down	-	pos	17041-44-0	806.566	10.2702	M+Na	C44H82NO8P	81.8	-	HMDB0008072;HMDB0011310;HMDB0011244;HMDB0013425;HMDB0013429;HMDB0008105	-	-	-	-	-	Lipids and lipid-like molecules	Glycerophospholipids	Glycerophosphocholines	81.8	-	-	-	1.6755	1.6812	0.9098	0.01226	0.1177	5.2539	5.4813	5.3828	5.9191	5.72	6.0788
pos_4958	DG(18:3(9Z,12Z,15Z)/16:0/0:0)	metab_4951	yes	up	C00165	pos	-	591.498	9.71402	M+H	C37H66O5	73.6	-	PW_C003352;HMDB0007301	-	-	-	-	-	Lipids and lipid-like molecules	Fatty Acyls	Lineolic acids and derivatives	73.6	-	-	-	1.6126	1.6088	1.1191	0.03208	0.1781	5.0531	4.9447	4.6613	4.4205	4.5254	4.152
pos_5093	PC(18:0/0:0)	metab_5086	yes	down	C04230	pos	19420-57-6	546.353	9.26488	M+Na	C26H54NO7P	95.8	-	LMGP01050026;HMDB0010384	Lipids	Phospholipids	map00564	Metabolism	Lipid metabolism	Lipids and lipid-like molecules	Glycerophospholipids	Glycerophosphocholines	95.8	-	Glycerophospholipid metabolism	Glycerophospholipid metabolism	1.2869	1.2792	0.9462	0.004006	0.0693	5.2027	5.2778	5.3632	5.5669	5.6197	5.556
pos_5414	LysoPA(16:0/0:0)	metab_5407	yes	up	C04036	pos	-	393.24	8.30415	M+H-H2O	C19H39O7P	-	39.6	HMDB0007853	-	-	-	-	-	Lipids and lipid-like molecules	Glycerophospholipids	Glycerophosphates	-	39.6	-	-	1.2602	1.2463	1.0607	0.007824	0.09811	5.1096	5.1567	5.0015	4.7364	4.7943	4.8641
pos_5491	Val His Pro Leu	metab_5484	yes	up	-	pos	-	465.282	8.07045	M+H	C22H36N6O5	53.2	-	-	-	-	-	-	-	-	-	-	53.2	-	-	-	3.0512	3.0273	2.0123	0.001467	0.04399	3.3678	3.4061	3.0119	1.9593	1.441	1.4627
pos_5749	(+/-)-(Z)-2-(5-Tetradecenyl)cyclobutanone	metab_5742	yes	down	-	pos	173074-85-6	306.279	7.3556	M+ACN+H	C18H32O	-	71	HMDB0037543	-	-	-	-	-	Organic oxygen compounds	Organooxygen compounds	Carbonyl compounds	-	71	-	-	1.5761	1.5672	0.9101	0.01647	0.1376	4.9042	4.8507	4.76	5.0986	5.4754	5.373
pos_5813	PC(18:3/0:0)	metab_5806	yes	down	-	pos	-	540.306	7.18178	M+Na	C26H48NO7P	97.6	-	HMDB0010388;LMGP01050038	-	-	-	-	-	Lipids and lipid-like molecules	Glycerophospholipids	Glycerophosphocholines	97.6	-	-	-	1.6202	1.6056	0.9059	0.005427	0.08092	4.6989	4.4989	4.5441	5.0077	5.1807	4.9816
pos_6053	PC(16:0/2:0)[S]	metab_6046	yes	down	-	pos	-	538.35	6.29393	M+H	C26H52NO8P	53.9	-	-	-	-	-	-	-	-	-	-	53.9	-	-	-	1.3483	1.3374	0.9376	0.0009364	0.03579	4.7938	4.77	4.8213	5.18	5.0802	5.0805
pos_6253	Herculin	metab_6246	yes	up	-	pos	-	269.259	5.63333	M+NH4	C16H29NO	-	61.6	LMFA08020180;HMDB0030275	-	-	-	-	-	Lipids and lipid-like molecules	Fatty Acyls	Fatty amides	-	61.6	-	-	2.5144	2.5196	1.4079	0.04062	0.1781	4.8247	4.299	4.5645	3.2587	2.5105	3.9527
pos_6578	Methyl 3,4-dicaffeoylquinate	metab_6569	yes	up	-	pos	345642-66-2	527.155	4.47343	M+H-H2O	C27H28O12	-	45.6	HMDB0037093	-	-	-	-	-	Organic oxygen compounds	Organooxygen compounds	Alcohols and polyols	-	45.6	-	-	1.6031	1.5967	1.156	0.00218	0.0527	3.5016	3.3822	3.3388	3.0358	2.8992	2.91
pos_6579	Prehumulinic acid	metab_6570	yes	up	-	pos	-	322.202	4.47343	M+ACN+H	C16H24O4	-	41.8	HMDB0030148	-	-	-	-	-	Organic acids and derivatives	Vinylogous acids	Not Available	-	41.8	-	-	1.6023	1.5945	1.1888	0.01644	0.1376	3.3078	3.0947	2.9266	2.52	2.6102	2.7173
pos_6602	Malvidin	metab_6593	yes	up	C08716	pos	643-84-5	331.081	4.40528	M+H	C17H14O7	76	-	LMPK12010004	-	-	-	-	-	-	-	-	76	-	-	-	1.9503	1.9409	1.1637	0.002595	0.05601	4.8987	4.8406	4.7372	4.126	4.3117	4.0029
pos_6689	Dorsteniol	metab_6680	yes	up	-	pos	80794-85-0	263.091	4.11113	M+H	C14H14O5	36.2	-	HMDB0032838	-	-	-	-	-	Phenylpropanoids and polyketides	Coumarins and derivatives	Furanocoumarins	36.2	-	-	-	2.2424	2.2348	1.3243	0.002109	0.05168	3.8049	3.5882	3.6555	2.6845	2.6586	3.0013
pos_6699	Xi-3-(4-Isopropylphenyl)-2-methylpropanal	metab_6690	yes	up	-	pos	-	191.143	4.08833	M+H	C13H18O	57.2	-	HMDB0037763	-	-	-	-	-	Lipids and lipid-like molecules	Prenol lipids	Monoterpenoids	57.2	-	-	-	1.169	1.1652	1.0616	0.0007965	0.03411	4.1722	4.1253	4.1551	3.8781	3.9536	3.8989
pos_6736	15(R)-PGE1	metab_6727	yes	up	-	pos	-	337.237	3.95185	M+H-H2O	C20H34O5	72.9	-	-	-	-	-	-	-	-	-	-	72.9	-	-	-	1.2588	1.2696	1.082	0.04953	0.1969	4.7004	4.3405	4.6177	4.1382	4.1619	4.325
pos_6772	Acetoxy-6-gingerol	metab_6763	yes	up	-	pos	-	337.201	3.83782	M+H	C19H28O5	33	-	-	-	-	-	-	-	-	-	-	33	-	-	-	1.3162	1.3083	1.082	0.02104	0.1557	4.5368	4.4688	4.371	3.9892	4.1143	4.2591
pos_6825	(+/-)-Naringenin	metab_6815	yes	up	-	pos	-	273.076	3.72447	M+H	C15H12O5	84.4	-	-	-	-	-	-	-	-	-	-	84.4	-	-	-	3.092	3.0786	1.8475	2.514e-05	0.004032	3.6142	3.4639	3.72	1.9321	1.9444	1.9667
pos_6874	2'-Oxoaloesol 7-glucoside	metab_6864	yes	up	-	pos	-	417.118	3.61055	M+Na	C19H22O9	-	78	-	-	-	-	-	-	-	-	-	-	78	-	-	1.926	1.8967	1.3472	0.01096	0.1123	2.403	2.9286	2.6309	1.9547	1.967	1.9893
pos_6907	PGH2	metab_6896	yes	up	C00427	pos	42935-17-1	335.221	3.54203	M+H-H2O	C20H32O5	71.7	-	HMDB0001381;LMFA03010010	Lipids	Eicosanoids	map01100;map00590	Metabolism;Metabolism	Global and overview maps;Lipid metabolism	Lipids and lipid-like molecules	Fatty Acyls	Eicosanoids	71.7	-	Metabolic pathways;Arachidonic acid metabolism	Metabolic pathways;Arachidonic acid metabolism	1.1714	1.1785	1.0597	0.03682	0.1781	5.2059	4.9501	5.1391	4.7152	4.8193	4.8985
pos_6931	Taraxacoside	metab_6920	yes	up	-	pos	98449-40-2	381.118	3.49672	M+H-H2O	C18H22O10	-	79.8	HMDB0030055	-	-	-	-	-	Organic oxygen compounds	Organooxygen compounds	Carbohydrates and carbohydrate conjugates	-	79.8	-	-	2.0394	2.0244	1.1983	0.0117	0.1156	4.5475	4.8283	4.7633	4.0563	3.6242	4.1194
pos_6991	Isorhamnetin	metab_6979	yes	up	C10084	pos	480-19-3	317.065	3.40565	M+H	C16H12O7	84	-	HMDB0002655;LMPK12110002	-	-	-	-	-	Phenylpropanoids and polyketides	Flavonoids	Flavones	84	-	-	-	1.3586	1.3434	1.0938	0.008477	0.1009	3.8183	4.017	4.0243	3.6015	3.6525	3.5878
pos_7005	1'-Acetoxychavicol acetate	metab_6993	yes	up	C10426	pos	151986-17-3;52946-22-2	235.096	3.38282	M+H	C13H14O4	53.6	-	HMDB0041005;HMDB0041006	-	-	-	-	-	Benzenoids	Phenol esters	Not Available	53.6	-	-	-	1.3183	1.3193	1.116	0.03767	0.1781	3.4149	3.4404	3.4793	3.0429	2.9133	3.3055
pos_7064	Osmanthuside A	metab_7052	yes	up	-	pos	97457-19-7	429.152	3.26842	M+H-H2O	C23H26O9	-	56.6	HMDB0038748	-	-	-	-	-	Phenylpropanoids and polyketides	Cinnamic acids and derivatives	Hydroxycinnamic acids and derivatives	-	56.6	-	-	3.309	3.2846	1.5845	5.455e-05	0.006782	4.9558	5.1972	5.1773	3.299	3.0862	3.2902
pos_7066	7-Deoxy-13-dihydroadriamycinone	metab_7054	yes	up	-	pos	-	401.123	3.26842	M+H	C21H20O8	42.7	-	HMDB0244417	-	-	-	-	-	Benzenoids	Naphthacenes	Tetracenequinones	42.7	-	-	-	1.8706	1.857	1.1796	0.001947	0.04935	3.9675	4.1255	4.1427	3.378	3.4076	3.5873
pos_7071	Boviquinone 4	metab_7059	yes	up	-	pos	28129-52-4	207.138	3.26842	M+2H	C26H36O4	-	42.1	HMDB0030057	-	-	-	-	-	Lipids and lipid-like molecules	Prenol lipids	Diterpenoids	-	42.1	-	-	1.1558	1.1481	1.0593	0.005074	0.07876	4.2686	4.3417	4.4161	4.1176	4.0932	4.0862
pos_7078	Neoraufuracin	metab_7066	yes	up	-	pos	-	435.165	3.24553	M+H	C22H26O9	52.9	-	LMPK12130057	-	-	-	-	-	-	-	-	52.9	-	-	-	1.7039	1.7067	1.1334	0.03876	0.1781	5.1503	5.0542	5.1392	4.4059	4.2397	4.8934
pos_7107	Gibberellin A44	metab_7095	yes	up	C12308	pos	36434-15-8	347.185	3.2	M+H	C20H26O5	69.6	-	HMDB0036901;LMPR0104170030	-	-	-	-	-	Lipids and lipid-like molecules	Prenol lipids	Diterpenoids	69.6	-	-	-	1.1884	1.1868	1.0627	0.01792	0.1436	4.6997	4.6269	4.6585	4.302	4.338	4.5207
pos_7270	2,6-Dihydroxynaphthalene	metab_7258	yes	up	-	pos	-	161.06	2.9726	M+H	C10H8O2	55.3	-	-	-	-	-	-	-	-	-	-	55.3	-	-	-	1.4031	1.3915	1.1046	0.005931	0.0835	3.6704	3.8337	3.8688	3.4384	3.3811	3.4772
pos_7289	1,2-Disinapoylgentiobiose	metab_7277	yes	up	-	pos	-	777.221	2.92713	M+Na	C34H42O19	-	36.2	HMDB0030335	-	-	-	-	-	Phenylpropanoids and polyketides	Cinnamic acids and derivatives	Hydroxycinnamic acids and derivatives	-	36.2	-	-	1.7431	1.7355	1.1124	0.01103	0.1126	5.539	5.6798	5.7312	5.0596	4.8928	5.2857
pos_7302	3-Hydroxy-1-methylestra-1,3,5(10),6-tetraen-17-one	metab_7290	yes	up	C15308	pos	-	283.169	2.92713	M+H	C19H22O2	40.9	-	-	-	-	-	-	-	-	-	-	40.9	-	-	-	1.3857	1.3818	1.1016	0.01295	0.1216	3.9986	3.9307	3.9815	3.462	3.6008	3.7503
pos_7320	4-Hydroxy-2,3,9-trimethoxypterocarpan	metab_7308	yes	up	-	pos	56841-82-8	331.118	2.90442	M+H	C18H18O6	32.5	-	LMPK12070089;HMDB0033817	-	-	-	-	-	Organic oxygen compounds	Organooxygen compounds	Carbonyl compounds	32.5	-	-	-	2.0246	2.0028	1.2727	0.002639	0.05621	3.2661	3.5363	3.3625	2.7155	2.7573	2.5144
pos_7322	(R)-Bitalin A	metab_7310	yes	up	-	pos	35844-67-8	219.102	2.90442	M+H	C13H14O3	42.6	-	HMDB0040358	-	-	-	-	-	Benzenoids	Benzene and substituted derivatives	Acetophenones	42.6	-	-	-	1.1765	1.1625	1.0763	0.004411	0.07293	3.4348	3.5667	3.4921	3.2264	3.2347	3.2881
pos_7368	Phe Ile	metab_7356	yes	up	-	pos	-	279.17	2.83688	M+H	C15H22N2O3	71.4	-	-	-	-	-	-	-	-	-	-	71.4	-	-	-	1.2242	1.2194	1.0863	0.009134	0.1037	3.4453	3.492	3.6318	3.2749	3.2073	3.2456
pos_7386	L-Pyridosine	metab_7374	yes	up	-	pos	31489-08-4	277.118	2.81553	M+Na	C12H18N2O4	-	65.7	HMDB0029443	-	-	-	-	-	Organic acids and derivatives	Carboxylic acids and derivatives	Amino acids, peptides, and analogues	-	65.7	-	-	1.2121	1.2093	1.0788	0.01105	0.1126	3.7962	3.7711	3.7249	3.5307	3.562	3.3751
pos_7434	Arg Lys Lys Phe	metab_7422	yes	up	-	pos	-	578.374	2.74753	M+H	C27H47N9O5	61.4	-	-	-	-	-	-	-	-	-	-	61.4	-	-	-	2.0972	2.09	1.3377	0.005848	0.08296	3.165	3.1448	3.2579	2.2788	2.673	2.2011
pos_7459	7-Hydroxy-3-(4-methoxyphenyl)-4-propyl-2H-1-benzopyran-2-one	metab_7447	yes	up	C15051	pos	5219-18-1	311.128	2.72525	M+H	C19H18O4	30.7	-	-	-	-	-	-	-	-	-	-	30.7	-	-	-	2.3949	2.3754	1.4281	0.0005508	0.02745	3.2066	3.4125	3.3592	2.4058	2.407	2.1732
pos_7463	Orsellinic acid	metab_7451	yes	up	C01839	pos	-	169.05	2.72525	M+H	C8H8O4	88.4	-	LMPK13010001	-	-	-	-	-	-	-	-	88.4	-	-	-	1.0354	1.0288	1.0607	0.0009751	0.03579	3.2822	3.3023	3.3241	3.0782	3.13	3.1346
pos_7496	C12:5n-1,3,5,7,9	metab_7484	yes	up	-	pos	-	191.107	2.65757	M+H	C12H14O2	61.7	-	LMFA01030243	-	-	-	-	-	-	-	-	61.7	-	-	-	1.081	1.0746	1.0556	0.01185	0.1156	4.0977	4.1723	4.2679	3.9792	3.9486	3.9487
pos_7501	Eriodictyol 7-(6-galloylglucoside)	metab_7489	yes	down	-	pos	-	585.124	2.63507	M+H-H2O	C28H26O15	-	49.2	HMDB0039921	-	-	-	-	-	Phenylpropanoids and polyketides	Flavonoids	Flavonoid glycosides	-	49.2	-	-	3.0144	2.9749	0.3012	0.04725	0.1906	2.1237	0.1514	0.1523	2.5567	2.8489	2.6536
pos_7512	3,4,5-trihydroxy-6-{3-[(5-oxooxolan-2-yl)methyl]phenoxy}oxane-2-carboxylic acid	metab_7500	yes	down	-	pos	-	759.213	2.61247	2M+Na	C17H20O9	-	48.6	-	-	-	-	-	-	-	-	-	-	48.6	-	-	1.3987	1.3885	0.8912	0.005068	0.07876	2.8394	2.8572	3.0019	3.1972	3.2395	3.3237
pos_7527	Malonyldaidzin	metab_7515	yes	down	C16191	pos	124590-31-4	503.116	2.58998	M+H	C24H22O12	42.4	-	HMDB0041263	-	-	-	-	-	Phenylpropanoids and polyketides	Coumarins and derivatives	Furanocoumarins	42.4	-	-	-	2.113	2.1179	0.7887	0.006356	0.08647	2.8731	3.3817	3.0598	3.8474	4.0409	3.9222
pos_7577	2-Hydroxyiminodibenzyl glucuronide	metab_7565	yes	down	-	pos	-	388.139	2.5	M+H	C20H21NO7	32.5	-	-	-	-	-	-	-	-	-	-	32.5	-	-	-	3.4502	3.429	0.5496	1.357e-05	0.002998	2.5673	2.5096	2.4211	4.5227	4.674	4.4448
pos_7590	Glu Trp	metab_7578	yes	up	-	pos	-	334.14	2.47772	M+H	C16H19N3O5	61.6	-	-	-	-	-	-	-	-	-	-	61.6	-	-	-	1.6852	1.6847	1.14	0.007465	0.09544	4.4408	4.1923	4.2916	3.6341	3.8977	3.8053
pos_7617	3-Phenylpropyl acetate	metab_7605	yes	up	C17663	pos	122-72-5	179.107	2.43397	M+H	C11H14O2	59.5	-	HMDB0033386	-	-	-	-	-	Benzenoids	Benzene and substituted derivatives	Not Available	59.5	-	-	-	1.4656	1.4534	1.1018	0.01251	0.1193	4.2395	4.4029	4.4759	4.0865	3.9455	3.8743
pos_7621	N-Deschlorobenzoyl indomethacin	metab_7609	yes	up	-	pos	-	202.086	2.41213	M+H-H2O	C12H13NO3	-	50.7	HMDB0013988	-	-	-	-	-	Organoheterocyclic compounds	Indoles and derivatives	Indolyl carboxylic acids and derivatives	-	50.7	-	-	1.5376	1.5309	1.106	0.001591	0.04585	4.3998	4.3704	4.4058	3.9332	3.9027	4.0781
pos_7665	6-(3-hydroxybut-1-en-1-yl)-7-methoxy-2H-chromen-2-one	metab_7653	yes	up	-	pos	-	556.194	2.32748	2M+ACN+Na	C14H14O4	-	36.2	-	-	-	-	-	-	-	-	-	-	36.2	-	-	2.3692	2.3566	1.4162	2.378e-05	0.004032	3.2536	3.2511	3.3787	2.3107	2.3231	2.3456
pos_7672	3-(5-Methyl-2-furyl)prop-2-enal	metab_7660	yes	up	-	pos	5555-90-8	137.06	2.32748	M+H	C8H8O2	-	39.7	HMDB0032400	-	-	-	-	-	Organoheterocyclic compounds	Heteroaromatic compounds	Not Available	-	39.7	-	-	1.1858	1.1716	1.0591	0.008756	0.1023	4.5261	4.6997	4.654	4.3718	4.3418	4.392
pos_7683	ETHYL SYRINGATE	metab_7671	yes	up	-	pos	-	227.091	2.30553	M+H	C11H14O5	66.6	-	-	-	-	-	-	-	-	-	-	66.6	-	-	-	1.2888	1.2804	1.0793	0.003784	0.06769	4.0047	4.0941	4.1548	3.7644	3.7581	3.8319
pos_7692	Pro Trp	metab_7680	yes	up	-	pos	-	302.15	2.28422	M+H	C16H19N3O3	56.3	-	-	-	-	-	-	-	-	-	-	56.3	-	-	-	1.2185	1.23	1.0901	0.03807	0.1781	3.8873	3.6306	3.6592	3.4083	3.5262	3.319
pos_7725	3,4,5,2',4',6'-Hexahydroxychalcone 2'-glucoside	metab_7713	yes	up	-	pos	-	467.119	2.21967	M+H	C21H22O12	39.4	-	LMPK12120279	-	-	-	-	-	-	-	-	39.4	-	-	-	1.6613	1.657	1.1676	0.001257	0.04138	3.5069	3.3481	3.4037	2.9294	2.8611	2.9952
pos_7726	Pro Ile Tyr	metab_7714	yes	up	-	pos	-	392.218	2.21967	M+H	C20H29N3O5	63.4	-	-	-	-	-	-	-	-	-	-	63.4	-	-	-	1.6392	1.6128	1.2269	0.01217	0.1172	2.5288	2.9083	2.6253	2.1747	2.187	2.2095
pos_7729	DIHYDROROBINETIN	metab_7717	yes	up	-	pos	-	305.065	2.21967	M+H	C15H12O7	57.4	-	-	-	-	-	-	-	-	-	-	57.4	-	-	-	2.0444	2.0298	1.2806	0.02113	0.1559	3.4714	3.8594	3.7616	3.0114	2.5207	3.13
pos_7732	3R-aminononanoic acid	metab_7720	yes	down	-	pos	-	174.149	2.21967	M+H	C9H19NO2	58	-	LMFA01100019	-	-	-	-	-	-	-	-	58	-	-	-	2.4994	2.492	0.7316	0.00216	0.05258	3.1552	3.2134	2.7983	4.2904	4.2474	3.993
pos_7764	Graveobioside B	metab_7752	yes	up	-	pos	33579-63-4	595.166	2.13353	M+H	C27H30O15	30.5	-	HMDB0037454	-	-	-	-	-	Phenylpropanoids and polyketides	Flavonoids	Flavonoid glycosides	30.5	-	-	-	1.4705	1.4604	1.0825	0.001212	0.04011	4.9862	5.0091	4.9674	4.5712	4.6966	4.5546
pos_7770	Quercetin 3-(3-p-coumaroylglucoside)	metab_7758	yes	up	-	pos	76211-70-6	593.129	2.11117	M+H-H2O	C30H26O14	-	65.2	HMDB0037365	-	-	-	-	-	Phenylpropanoids and polyketides	Flavonoids	Flavonoid glycosides	-	65.2	-	-	4.4046	4.3773	3.3308	4.939e-09	3.643e-05	4.7804	4.7488	4.7295	1.4119	1.4239	1.4456
pos_7808	Cadabicine methyl ether	metab_7795	yes	up	-	pos	-	472.218	2.025	M+Na	C26H31N3O4	-	65.5	HMDB0039857	-	-	-	-	-	Phenylpropanoids and polyketides	Flavonoids	Flavonoid glycosides	-	65.5	-	-	3.0333	3.0388	1.6688	0.03902	0.1781	4.5319	4.5366	5.2131	2.1669	2.3665	4.0251
pos_7877	3-Methylindole	metab_7863	yes	up	C08313	pos	83-34-1	132.081	1.92117	M+H	C9H9N	63.2	-	HMDB0000466	-	-	map00380	Metabolism	Amino acid metabolism	Organoheterocyclic compounds	Indoles and derivatives	Indoles	63.2	-	Tryptophan metabolism	Tryptophan metabolism	1.6254	1.614	1.1238	0.001338	0.04187	4.2788	4.2507	4.1646	3.6726	3.8269	3.7967
pos_7964	3'-Glucosyl-2',4',6'-trihydroxyacetophenone	metab_7950	yes	up	-	pos	88885-07-8	353.084	1.8122	M+Na	C14H18O9	-	37	HMDB0040621	-	-	-	-	-	Organic oxygen compounds	Organooxygen compounds	Carbohydrates and carbohydrate conjugates	-	37	-	-	1.567	1.5751	1.2156	0.04924	0.1959	2.8987	2.8618	3.0012	2.5232	2.6375	2.0471
pos_8029	Val Ile Glu	metab_8014	yes	down	-	pos	-	360.213	1.72755	M+H	C16H29N3O6	53.5	-	-	-	-	-	-	-	-	-	-	53.5	-	-	-	3.6059	3.5842	0.0786	0.001377	0.04251	0.2036	0.1921	0.1932	2.9925	2.513	1.9862
pos_8033	2-Keto-glutaramic acid	metab_8018	yes	down	C00940	pos	18465-19-5	308.106	1.72755	2M+NH4	C5H7NO4	-	68	HMDB0001552	-	-	map01100;map00250	Metabolism;Metabolism	Global and overview maps;Amino acid metabolism	Organic acids and derivatives	Keto acids and derivatives	Short-chain keto acids and derivatives	-	68	Metabolic pathways;Alanine, aspartate and glutamate metabolism	Metabolic pathways;Alanine, aspartate and glutamate metabolism	2.5427	2.5166	0.7514	0.001309	0.04185	3.6756	3.2381	3.3574	4.4507	4.5958	4.6251
pos_8062	8-(1-hydroxy-2-methoxypropan-2-yl)-2H-furo[2,3-h]chromen-2-one	metab_8047	yes	up	-	pos	-	566.206	1.68488	2M+NH4	C15H14O5	-	68.1	-	-	-	-	-	-	-	-	-	-	68.1	-	-	1.4313	1.4199	1.0914	0.0332	0.1781	4.7886	5.0248	4.881	4.542	4.2789	4.6434
pos_8090	Glu Met	metab_8075	yes	up	-	pos	-	279.101	1.66558	M+H	C10H18N2O5S	44.6	-	-	-	-	-	-	-	-	-	-	44.6	-	-	-	1.9767	1.9629	1.2679	0.009237	0.1042	3.5076	3.4978	3.2724	2.9602	2.6295	2.5167
pos_8097	3-Hydroxymonoethylglycinexylidide	metab_8082	yes	down	C16572	pos	34604-56-3	187.124	1.66558	M+H-2H2O	C12H18N2O2	-	46.9	HMDB0060678;PW_C040577	-	-	-	-	-	Organic acids and derivatives	Carboxylic acids and derivatives	Amino acids, peptides, and analogues	-	46.9	-	-	2.3538	2.3337	0.8032	0.00015	0.01333	4.0255	3.811	3.8577	4.8339	4.8326	4.8929
pos_8101	Ne,Ne dimethyllysine	metab_8086	yes	up	C05545	pos	-	157.134	1.66558	M+H-H2O	C8H18N2O2	-	30.6	HMDB0013287	-	-	map01100;map00310	Metabolism;Metabolism	Global and overview maps;Amino acid metabolism	Organic acids and derivatives	Carboxylic acids and derivatives	Amino acids, peptides, and analogues	-	30.6	Metabolic pathways;Lysine degradation	Metabolic pathways;Lysine degradation	2.9345	2.8985	1.5318	0.002069	0.05117	4.2658	4.7639	4.0633	2.9384	2.8223	2.7867
pos_8130	2-(4-Methyl-5-thiazolyl)ethyl formate	metab_8115	yes	down	-	pos	90731-56-9	213.069	1.64665	M+ACN+H	C7H9NO2S	-	43.7	HMDB0032420	-	-	-	-	-	Organoheterocyclic compounds	Azoles	Thiazoles	-	43.7	-	-	2.1222	2.1184	0.7897	0.02328	0.1639	3.2661	3.2626	3.382	3.879	4.0077	4.6639
pos_8157	4-Methyl-5-thiazoleethanol	metab_8142	yes	down	C04294	pos	137-00-8	144.048	1.62473	M+H	C6H9NOS	52.4	-	HMDB0032985	-	-	map00730;map01100;map01240	Metabolism;Metabolism;Metabolism	Metabolism of cofactors and vitamins;Global and overview maps;Global and overview maps	Organoheterocyclic compounds	Azoles	Thiazoles	52.4	-	Thiamine metabolism;Metabolic pathways;Biosynthesis of cofactors	Thiamine metabolism;Metabolic pathways;Biosynthesis of cofactors	1.042	1.0279	0.9423	0.0158	0.1355	3.4117	3.2658	3.3642	3.5302	3.6054	3.5193
pos_8158	3-Hydroxyaminophenol	metab_8143	yes	down	C14602	pos	-	126.055	1.62473	M+H	C6H7NO2	32.4	-	-	-	-	-	-	-	-	-	-	32.4	-	-	-	1.0035	0.9973	0.9576	0.003148	0.06215	4.1597	4.1189	4.0677	4.3168	4.2845	4.2883
pos_8172	5-Acetyl-2,3-dihydro-1H-pyrrolizine	metab_8157	yes	down	-	pos	55041-85-5	150.091	1.604	M+H	C9H11NO	-	30.5	HMDB0040051	-	-	-	-	-	Organoheterocyclic compounds	Pyrrolizines	Not Available	-	30.5	-	-	2.7072	2.6916	0.7331	3.823e-05	0.005321	3.5587	3.5056	3.3527	4.7045	4.7509	4.7535
pos_8233	5'-Deoxyadenosine	metab_8218	yes	up	C05198	pos	4754-39-6	252.109	1.48015	M+H	C10H13N5O3	93.4	-	HMDB0001983	-	-	-	-	-	Nucleosides, nucleotides, and analogues	5''-deoxyribonucleosides	Not Available	93.4	-	-	-	1.9141	1.9027	1.1702	0.0003123	0.02134	4.3247	4.3699	4.4439	3.7025	3.8269	3.6975
pos_8315	Ptelatoside B	metab_8300	yes	up	-	pos	90852-99-6	470.198	1.3769	M+ACN+H	C20H28O10	-	71.6	HMDB0034447	-	-	-	-	-	Organic oxygen compounds	Organooxygen compounds	Carbohydrates and carbohydrate conjugates	-	71.6	-	-	1.2534	1.2474	1.0642	0.03461	0.1781	5.1358	5.325	5.3063	4.8578	4.8584	5.1003
pos_8355	1-(3-Methylbutanoyl)-6-apiosylglucose	metab_8340	yes	down	-	pos	467242-31-5	438.197	1.18488	M+ACN+H	C16H28O11	-	40.7	HMDB0039953	-	-	-	-	-	Lipids and lipid-like molecules	Fatty Acyls	Fatty acyl glycosides	-	40.7	-	-	3.7519	3.6875	0.425	0.01402	0.1273	2.6476	0.6883	2.4723	4.6046	4.4551	4.6054
pos_8406	Isoputreanine	metab_8390	yes	down	-	pos	66165-33-1	143.118	1.01958	M+H-H2O	C7H16N2O2	-	30.8	HMDB0006009	-	-	-	-	-	Organic acids and derivatives	Carboxylic acids and derivatives	Amino acids, peptides, and analogues	-	30.8	-	-	1.3066	1.2946	0.9136	0.02434	0.1672	3.5121	3.4087	3.5749	3.7295	3.7712	3.9894
pos_8474	Tranexamic Acid	metab_8458	yes	up	C12535	pos	1197-18-8	190.144	0.939317	M+CH3OH+H	C8H15NO2	-	33.5	PW_C008836;HMDB0014447	-	-	-	-	-	Organic acids and derivatives	Carboxylic acids and derivatives	Amino acids, peptides, and analogues	-	33.5	-	-	1.0531	1.0523	1.0554	0.04373	0.1814	4.5336	4.3853	4.3905	4.0815	4.2302	4.2976
pos_8574	4-Hydroxybenzaldehyde	metab_8558	yes	up	C00633	pos	123-08-0	123.044	0.70585	M+H	C7H6O2	88.2	-	HMDB0011718	-	-	map01100	Metabolism	Global and overview maps	Organic oxygen compounds	Organooxygen compounds	Carbonyl compounds	88.2	-	Metabolic pathways	Metabolic pathways	1.2665	1.2635	1.0674	0.02313	0.1637	5.1541	4.9808	4.9238	4.5932	4.765	4.7503
pos_6876	11beta-hydroxyandrost-4-ene-3,17-dione	metab_8990	yes	up	C05284	pos	382-44-5	303.195	3.61055	M+H	C19H26O3	42.4	-	LMST02020066;HMDB0006773	-	-	-	-	-	Organoheterocyclic compounds	Oxazinanes	Morpholines	42.4	-	-	-	1.3991	1.3944	1.0863	0.009128	0.1037	4.6788	4.59	4.5901	4.1531	4.2143	4.3921
pos_8003	Caffeic acid	metab_8992	yes	up	C01197	pos	501-16-6;4361-87-9;331-39-5	163.039	1.76857	M+H-H2O	C9H8O4	78	-	HMDB0003501;HMDB0001964	-	-	map01100;map00940;map01110	Metabolism;Metabolism;Metabolism	Global and overview maps;Biosynthesis of other secondary metabolites;Global and overview maps	Phenylpropanoids and polyketides	Cinnamic acids and derivatives	Hydroxycinnamic acids and derivatives	78	-	Metabolic pathways;Phenylpropanoid biosynthesis;Biosynthesis of secondary metabolites	Metabolic pathways;Phenylpropanoid biosynthesis;Biosynthesis of secondary metabolites	1.5942	1.5934	1.1309	0.01661	0.1379	4.1703	4.1882	4.398	3.7069	3.6193	3.9542
pos_7793	Epicatechin	metab_8996	yes	up	C09727;C06562	pos	490-46-0;154-23-4	291.086	2.0689	M+H	C15H14O6	83.2	-	HMDB0001871;LMPK12020003;HMDB0002780	-	-	map01100;map00941;map01110	Metabolism;Metabolism;Metabolism	Global and overview maps;Biosynthesis of other secondary metabolites;Global and overview maps	Phenylpropanoids and polyketides	Flavonoids	Flavans	83.2	-	Metabolic pathways;Flavonoid biosynthesis;Biosynthesis of secondary metabolites	Metabolic pathways;Flavonoid biosynthesis;Biosynthesis of secondary metabolites	3.7135	3.691	2.1396	4.318e-05	0.005792	4.3935	4.4439	4.5442	1.9522	2.3145	1.9868
pos_393	Estradiol	metab_8997	yes	up	C00951	pos	50-28-2	305.211	3.13162	M+Na, M+CH3OH+H, M+H-H2O	C18H24O2	-	66.2	HMDB0303648;PW_C000098;HMDB0000151;MJDBOTE0000772	Steroids;Hormones and transmitters	18-Carbon atoms;Steroid hormones	map01100	Metabolism	Global and overview maps	Lipids and lipid-like molecules	Steroids and steroid derivatives	Steroid esters	-	66.2	Metabolic pathways	Metabolic pathways	1.4616	1.4637	1.0741	0.005468	0.08095	5.8061	5.5994	5.7706	5.2626	5.3501	5.3761
neg_8	2-Hydroxydecanedioic acid	metab_9013	yes	up	-	neg	103963-71-9	217.108	3.39918	M-H, 2M+Hac-H, M+Na-2H, M-H2O-H	C10H18O5	-	47.9	HMDB0000424	-	-	-	-	-	Organic acids and derivatives	Hydroxy acids and derivatives	Medium-chain hydroxy acids and derivatives	-	47.9	-	-	1.2099	1.2055	1.0751	0.02028	0.1337	4.4547	4.624	4.5715	4.1446	4.1833	4.3683
neg_45	D-(+)-Raffinose	metab_9049	yes	down	C00492	neg	512-69-6	539.139	0.945883	M+Cl, M+K-2H, 2M-H	C18H32O16	93.5	-	HMDB0003213	-	-	map01100;map02010;map00052	Metabolism;Environmental Information Processing;Metabolism	Global and overview maps;Membrane transport;Carbohydrate metabolism	Organic oxygen compounds	Organooxygen compounds	Carbohydrates and carbohydrate conjugates	93.5	-	Metabolic pathways;ABC transporters;Galactose metabolism	Metabolic pathways;ABC transporters;Galactose metabolism	1.3835	1.3824	0.9254	0.02696	0.1548	5.4609	5.2482	5.1774	5.7836	5.84	5.5421
neg_56	Gingerglycolipid B	metab_9059	yes	down	-	neg	88168-90-5	723.381	7.59542	M-H, M+Cl, M+FA-H	C33H58O14	-	83.8	HMDB0041094	-	-	-	-	-	Lipids and lipid-like molecules	Glycerolipids	Glycosylglycerols	-	83.8	-	-	1.9376	1.9258	0.8633	0.009099	0.08991	5.0176	4.8758	4.8413	5.4082	5.9445	5.7165
neg_85	Glycerol 2-(9Z,12Z-octadecadienoate) 1-hexadecanoate 3-O-[alpha-D-galactopyranosyl-(1->6)-beta-D-galactopyranoside]	metab_9088	yes	down	-	neg	145033-48-3	961.611	9.86367	M-H, M+Cl, M+FA-H	C49H88O15	-	36.9	HMDB0041511	-	-	-	-	-	Lipids and lipid-like molecules	Glycerolipids	Glycosylglycerols	-	36.9	-	-	1.3865	1.3744	0.9037	0.04033	0.1905	4.1197	4.0643	4.1692	4.3033	4.8006	4.5662
neg_89	Gingerglycolipid C	metab_9092	yes	down	-	neg	35949-86-1	725.397	8.03735	M-H, M+FA-H, M+Cl	C33H60O14	-	74.1	LMGL04010018;HMDB0041095	-	-	-	-	-	Lipids and lipid-like molecules	Glycerolipids	Glycosylglycerols	-	74.1	-	-	1.9402	1.932	0.8419	0.01527	0.1184	4.5364	4.1422	4.1183	4.815	5.3107	5.0766
neg_93	Gingerglycolipid A	metab_9096	yes	down	-	neg	145937-22-0	721.366	7.1724	M-H, M+Cl, M+FA-H	C33H56O14	-	85.1	HMDB0041093;LMGL04010019	-	-	-	-	-	Lipids and lipid-like molecules	Glycerolipids	Glycosylglycerols	-	85.1	-	-	1.7751	1.7695	0.8278	0.03867	0.187	3.8193	3.1203	3.4131	3.9837	4.4006	4.1233
neg_104	Cymorcin monoglucoside	metab_9107	yes	up	-	neg	76859-62-6	327.145	2.65607	M-H, M+Cl, M+FA-H	C16H24O7	-	37	HMDB0029777	-	-	-	-	-	Organic oxygen compounds	Organooxygen compounds	Carbohydrates and carbohydrate conjugates	-	37	-	-	1.8879	1.8786	1.3056	0.0165	0.1236	2.9855	3.4315	3.3356	2.7318	2.2636	2.4738
neg_112	3',6-Disinapoylsucrose	metab_9115	yes	up	-	neg	139891-98-8	753.225	2.93103	M-H, M+Cl, M+Na-2H	C34H42O19	-	81.7	HMDB0040838	-	-	-	-	-	Phenylpropanoids and polyketides	Cinnamic acids and derivatives	Hydroxycinnamic acids and derivatives	-	81.7	-	-	1.8549	1.8461	1.1513	0.009862	0.09272	5.3883	5.4855	5.4914	4.7039	4.4935	5.0153
neg_113	(+/-)-Taxifolin	metab_9116	yes	up	-	neg	149418-37-1	303.051	3.05855	M-H, M+Na-2H, M-H2O-H	C15H12O7	73.7	-	HMDB0040894	-	-	-	-	-	Phenylpropanoids and polyketides	Stilbenes	Not Available	73.7	-	-	-	3.4809	3.4619	1.9321	1.026e-06	0.0004645	4.7166	4.8479	4.8575	2.463	2.5052	2.4952
neg_114	2-Feruloyl-1-sinapoylgentiobiose	metab_9117	yes	up	-	neg	-	723.215	3.05855	M-H, M+Na-2H, M+Cl	C33H40O18	-	68.1	HMDB0030334	-	-	-	-	-	Phenylpropanoids and polyketides	Cinnamic acids and derivatives	Hydroxycinnamic acids and derivatives	-	68.1	-	-	1.0323	1.0298	1.0443	0.03428	0.1767	5.649	5.7447	5.7348	5.4388	5.3634	5.6015
neg_120	Cinncassiol D4 2-glucoside	metab_9122	yes	up	-	neg	-	559.277	3.44482	M-H, M+Cl, M+FA-H	C26H42O10	-	47.4	HMDB0035065	-	-	-	-	-	Lipids and lipid-like molecules	Prenol lipids	Terpene glycosides	-	47.4	-	-	1.056	1.0582	1.0548	0.01459	0.1156	4.6489	4.4912	4.655	4.3148	4.3847	4.378
neg_224	L-Histidine	metab_9226	yes	up	C00135	neg	71-00-1	154.061	0.5798	M-H2O-H, M-H	C6H9N3O2	91.6	-	PW_C000116;HMDB0000177	Peptides	Amino acids	map01100;map01110;map00340;map02010;map01230;map00970;map00410	Metabolism;Metabolism;Metabolism;Environmental Information Processing;Metabolism;Genetic Information Processing;Metabolism	Global and overview maps;Global and overview maps;Amino acid metabolism;Membrane transport;Global and overview maps;Translation;Metabolism of other amino acids	Organic acids and derivatives	Carboxylic acids and derivatives	Amino acids, peptides, and analogues	91.6	-	Metabolic pathways;Biosynthesis of secondary metabolites;Histidine metabolism;ABC transporters;Biosynthesis of amino acids;Aminoacyl-tRNA biosynthesis;beta-Alanine metabolism	Metabolic pathways;Biosynthesis of secondary metabolites;Histidine metabolism;ABC transporters;Biosynthesis of amino acids;Aminoacyl-tRNA biosynthesis;beta-Alanine metabolism	1.0809	1.0826	1.0611	0.04151	0.1926	4.7555	4.6437	4.8152	4.3159	4.506	4.574
neg_288	4-Pyridoxic acid	metab_9290	yes	up	C00847	neg	82-82-6	182.045	1.59372	M-H, 2M+FA-H	C8H9NO4	81.1	-	HMDB0000017;PW_C000011	-	-	map01100;map00750	Metabolism;Metabolism	Global and overview maps;Metabolism of cofactors and vitamins	Organoheterocyclic compounds	Pyridines and derivatives	Pyridinecarboxylic acids and derivatives	81.1	-	Metabolic pathways;Vitamin B6 metabolism	Metabolic pathways;Vitamin B6 metabolism	1.0976	1.0919	1.0522	0.0005625	0.01793	4.7205	4.726	4.7026	4.4568	4.5263	4.4616
neg_315	Thiomorpholine 3-carboxylate	metab_9317	yes	up	C03901	neg	20960-92-3	353.088	1.70663	M+FA-H, 2M+Hac-H	C5H9NO2S	-	32.8	HMDB0059611	-	-	-	-	-	Organic acids and derivatives	Carboxylic acids and derivatives	Amino acids, peptides, and analogues	-	32.8	-	-	2.2191	2.2075	1.4361	0.0006647	0.0197	3.1744	3.1049	3.2329	2.292	2.0211	2.3104
neg_334	6-Caffeoylsucrose	metab_9336	yes	up	-	neg	-	503.141	1.77495	M-H, M+FA-H	C21H28O14	-	66.4	HMDB0035486	-	-	-	-	-	Organic oxygen compounds	Organooxygen compounds	Carbohydrates and carbohydrate conjugates	-	66.4	-	-	2.1232	2.1156	1.2248	0.0203	0.1337	5.3061	5.2661	5.4635	4.2596	3.9811	4.8502
neg_340	2-Hydroxybenzaldehyde O-[xylosyl-(1->6)-glucoside]	metab_9342	yes	up	-	neg	14907-56-3	461.13	1.79778	M+Na-2H, M+FA-H	C18H24O11	-	46	HMDB0034157	-	-	-	-	-	Organic oxygen compounds	Organooxygen compounds	Carbohydrates and carbohydrate conjugates	-	46	-	-	1.6092	1.599	1.1239	0.001926	0.03756	4.5317	4.7629	4.6388	4.1189	4.0993	4.1771
neg_377	1-(dimethylamino)-2-methyl-3,4-diphenylbutane-1,3-diol	metab_9379	yes	up	-	neg	-	344.183	1.95627	M+Na-2H, M+FA-H	C19H25NO2	-	34.2	-	-	-	-	-	-	-	-	-	-	34.2	-	-	1.6368	1.6255	1.2979	0.001305	0.02963	2.1983	2.4172	2.2714	1.7548	1.7943	1.7579
neg_391	Monotropein	metab_9393	yes	up	C09788	neg	5945-50-6	389.109	2.023	M-H, M+Cl	C16H22O11	-	49.9	HMDB0035608;LMPR0102070012	-	-	-	-	-	Lipids and lipid-like molecules	Prenol lipids	Terpene glycosides	-	49.9	-	-	2.9402	2.9247	1.7056	0.0003134	0.01278	4.0929	4.0348	4.0408	2.1947	2.2779	2.66
neg_403	Homoveratric acid	metab_9405	yes	up	-	neg	93-40-3	195.065	2.0893	M-H, M+Na-2H	C10H12O4	36	-	HMDB0000434	-	-	-	-	-	Benzenoids	Benzene and substituted derivatives	Methoxybenzenes	36	-	-	-	1.5254	1.5172	1.157	0.009152	0.0903	3.3694	3.7114	3.5983	3.0471	3.11	3.0735
neg_411	3-Hydroxysuberic acid	metab_9413	yes	up	-	neg	73141-47-6	189.076	2.134	M-H, 2M+Hac-H	C8H14O5	-	32.6	HMDB0000325	-	-	-	-	-	Organic acids and derivatives	Hydroxy acids and derivatives	Medium-chain hydroxy acids and derivatives	-	32.6	-	-	1.1592	1.1584	1.0696	0.009907	0.09301	4.4036	4.2361	4.3534	3.9884	4.0484	4.1113
neg_426	(-)-trans-3,4-Dihydro-4,8-dihydroxy-3-methyl-1H-2-benzopyran-1-one	metab_9428	yes	up	-	neg	70287-70-6	239.056	2.2237	M-H2O-H, M+FA-H	C10H10O4	-	64.4	HMDB0030765	-	-	-	-	-	Organoheterocyclic compounds	Benzopyrans	2-benzopyrans	-	64.4	-	-	1.0186	1.0169	1.0572	0.02186	0.138	4.0611	4.2294	4.2417	3.9725	3.9069	3.9723
neg_428	3-O-Feruloylquinic acid	metab_9430	yes	up	C02572	neg	62929-69-5	367.103	2.11192	M-H, M+Na-2H	C17H20O9	-	64.9	HMDB0030669	-	-	-	-	-	Organic oxygen compounds	Organooxygen compounds	Alcohols and polyols	-	64.9	-	-	1.0325	1.0252	1.0537	0.02777	0.1569	4.5393	4.7304	4.5768	4.3071	4.3962	4.4358
neg_430	2-(3,4,5-trihydroxyphenyl)-3,4-dihydro-2H-1-benzopyran-3,4,5,7-tetrol	metab_9432	yes	up	-	neg	-	303.051	2.24608	M-H2O-H, M+Na-2H	C15H14O8	-	52.2	-	-	-	-	-	-	-	-	-	-	52.2	-	-	3.5743	3.555	2.5158	9.401e-06	0.001934	3.8971	4.1266	4.1803	1.6133	1.6228	1.6164
neg_444	Irilone 4'-glucoside	metab_9446	yes	up	-	neg	50868-47-8	441.083	2.31362	M-H2O-H, M+FA-H	C22H20O11	-	40.9	HMDB0033818	-	-	-	-	-	Phenylpropanoids and polyketides	Isoflavonoids	Isoflavonoid O-glycosides	-	40.9	-	-	2.0865	2.0756	1.2701	0.003052	0.04957	4.0251	4.1945	4.0819	2.9746	3.3382	3.3701
neg_466	2',5'-Dihydroxyacetophenone	metab_9468	yes	up	-	neg	490-78-8	197.045	2.45027	M+FA-H, 2M-H	C8H8O3	-	33.3	HMDB0032629	-	-	-	-	-	Organic oxygen compounds	Organooxygen compounds	Carbonyl compounds	-	33.3	-	-	1.5874	1.5798	1.1401	0.0002903	0.01218	3.9718	3.9729	3.9934	3.4201	3.4885	3.5611
neg_477	Glutamyltryptophan	metab_9479	yes	up	-	neg	38101-59-6	332.125	2.496	M-H2O-H, M-H	C16H19N3O5	-	54.8	HMDB0028830	-	-	-	-	-	Organic acids and derivatives	Carboxylic acids and derivatives	Amino acids, peptides, and analogues	-	54.8	-	-	1.6021	1.6072	1.1724	0.03133	0.1673	4.1888	3.7424	3.8792	3.1254	3.5191	3.4304
neg_523	2-O-Benzoyl-D-glucose	metab_9525	yes	up	-	neg	63029-01-6	329.088	2.74795	M+Na-2H, M+FA-H	C13H16O7	-	77.4	HMDB0034618	-	-	-	-	-	Organic oxygen compounds	Organooxygen compounds	Carbohydrates and carbohydrate conjugates	-	77.4	-	-	2.4043	2.3947	1.8342	0.005688	0.06866	2.1623	2.7931	2.8413	1.4134	1.4226	1.4163
neg_537	3-Phenylpropyl glucosinolate	metab_9539	yes	up	-	neg	76265-25-3	436.071	2.81658	M-H, M+Na-2H	C16H23NO9S2	-	32.6	HMDB0038422	-	-	-	-	-	Organic oxygen compounds	Organooxygen compounds	Carbohydrates and carbohydrate conjugates	-	32.6	-	-	1.4584	1.4552	1.1167	0.003379	0.05192	4.1299	4.0509	4.1355	3.553	3.7618	3.7145
neg_576	Gamma-delta-Dioxovaleric acid	metab_9578	yes	up	C02800	neg	-	151.003	3.0362	M+Na-2H, 2M+FA-H	C5H6O4	-	55.9	HMDB0013233	-	-	map00860	Metabolism	Metabolism of cofactors and vitamins	Organic acids and derivatives	Keto acids and derivatives	Gamma-keto acids and derivatives	-	55.9	Porphyrin and chlorophyll metabolism	Porphyrin and chlorophyll metabolism	2.0461	2.0338	1.455	0.002717	0.04589	2.6481	2.7564	2.6053	1.8312	2.0419	1.6332
neg_671	Trilobatin	metab_9673	yes	up	-	neg	4192-90-9	435.13	3.28508	M-H2O-H, M-H	C21H24O10	-	80.3	HMDB0037505;LMPK12120518	-	-	-	-	-	Phenylpropanoids and polyketides	Flavonoids	Flavonoid glycosides	-	80.3	-	-	3.5944	3.5762	2.1347	0.0003315	0.01301	4.7803	4.5233	4.8673	2.335	1.8337	2.4691
neg_723	2-(3,5-dihydroxyphenyl)-3,5,6,7-tetrahydroxy-3,4-dihydro-2H-1-benzopyran-4-one	metab_9725	yes	up	-	neg	-	319.046	2.77092	M-H, M+Na-2H	C15H12O8	-	78.8	-	-	-	-	-	-	-	-	-	-	78.8	-	-	1.3617	1.356	1.2371	0.001477	0.03213	1.8253	1.9352	1.9849	1.5438	1.5532	1.5468
neg_924	LysoPA(i-14:0/0:0)	metab_9925	yes	up	-	neg	-	363.194	7.53683	M-H2O-H, M-H	C17H35O7P	-	35.6	HMDB0114765	-	-	-	-	-	Lipids and lipid-like molecules	Glycerophospholipids	Glycerophosphates	-	35.6	-	-	1.3332	1.3226	1.0874	0.004654	0.06017	4.5448	4.4905	4.3675	4.0906	4.0612	4.1762
neg_1035	LysoPC(18:3(6Z,9Z,12Z))	metab_10036	yes	down	C04230	neg	-	562.315	7.1724	M+Cl, M+FA-H	C26H48NO7P	-	81	HMDB0010387	Lipids	Phospholipids	map00564	Metabolism	Lipid metabolism	Lipids and lipid-like molecules	Glycerophospholipids	Glycerophosphocholines	-	81	Glycerophospholipid metabolism	Glycerophospholipid metabolism	1.3972	1.3896	0.9227	0.01012	0.09404	4.9578	4.7446	4.8302	5.1713	5.3752	5.2042
neg_1111	Fluorocitric acid	metab_10112	yes	up	-	neg	-	190.998	1.93463	M-H2O-H, M-H	C6H7FO7	-	44	-	-	-	-	-	-	-	-	-	-	44	-	-	2.093	2.0775	1.5367	0.001554	0.03339	2.4213	2.6339	2.3497	1.5277	1.537	1.7521
neg_1369	Cis-Aconitic Acid	metab_10370	yes	down	C00417	neg	585-84-2	173.008	0.698933	M-H, M-H2O-H	C6H6O6	62.3	-	PW_C000051;HMDB0000072	Organic acids	Carboxylic acids	map01100;map00630;map01110;map01210;map00020;map00660	Metabolism;Metabolism;Metabolism;Metabolism;Metabolism;Metabolism	Global and overview maps;Carbohydrate metabolism;Global and overview maps;Global and overview maps;Carbohydrate metabolism;Carbohydrate metabolism	Organic acids and derivatives	Carboxylic acids and derivatives	Tricarboxylic acids and derivatives	62.3	-	Metabolic pathways;Glyoxylate and dicarboxylate metabolism;Biosynthesis of secondary metabolites;2-Oxocarboxylic acid metabolism;Citrate cycle (TCA cycle);C5-Branched dibasic acid metabolism	Metabolic pathways;Glyoxylate and dicarboxylate metabolism;Biosynthesis of secondary metabolites;2-Oxocarboxylic acid metabolism;Citrate cycle (TCA cycle);C5-Branched dibasic acid metabolism	1.0043	0.9986	0.9567	0.04152	0.1926	5.1749	4.9842	5.1501	5.3405	5.4172	5.2444
neg_1425	6-Oxopiperidine-2-carboxylic acid	metab_10426	yes	down	-	neg	-	188.056	1.0313	M-H, M+FA-H	C6H9NO3	-	47.8	HMDB0061705	-	-	-	-	-	Organic acids and derivatives	Carboxylic acids and derivatives	Amino acids, peptides, and analogues	-	47.8	-	-	1.1514	1.1474	0.9384	0.01185	0.1031	4.3893	4.1971	4.213	4.5763	4.5407	4.5202
neg_1618	3-(3-methylbut-2-en-1-yl)-4-(sulfooxy)benzoic acid	metab_10619	yes	down	-	neg	-	571.092	0.75995	2M-H	C12H14O6S	-	36.6	-	-	-	-	-	-	-	-	-	-	36.6	-	-	1.3649	1.3553	0.9103	0.007659	0.08166	3.8872	3.8229	3.9197	4.256	4.3849	4.137
neg_1842	Isorhamnetin 3-O-[4-Hydroxy-E-cinnamoyl-(->6)-b-D-glucopyranosyl-(1->2)-a-L-rhamnopyranoside]	metab_10843	yes	down	-	neg	-	751.184	1.61653	M-H2O-H	C37H38O18	-	31.9	HMDB0038252	-	-	-	-	-	Phenylpropanoids and polyketides	Flavonoids	Flavonoid glycosides	-	31.9	-	-	1.0181	1.0101	0.9549	0.01055	0.09527	4.5927	4.5242	4.59	4.7483	4.7372	4.8682
neg_1871	N-Acetylcystathionine	metab_10872	yes	down	-	neg	20619-80-1	527.152	1.66145	2M-H	C9H16N2O5S	-	37.6	HMDB0002381	-	-	-	-	-	Organic acids and derivatives	Carboxylic acids and derivatives	Amino acids, peptides, and analogues	-	37.6	-	-	3.485	3.4673	0.4959	2.463e-05	0.002833	2.2761	2.428	2.18	4.4759	4.6883	4.7208
neg_1906	Glutamylmethionine	metab_10907	yes	up	-	neg	4423-22-7	277.086	1.72938	M-H	C10H18N2O5S	-	67.4	HMDB0028825	-	-	-	-	-	Organic acids and derivatives	Carboxylic acids and derivatives	Amino acids, peptides, and analogues	-	67.4	-	-	1.0195	1.0169	1.0721	0.01019	0.09404	3.2543	3.2048	3.175	2.93	3.0715	2.9822
neg_1977	Indole-3-carboxylic acid	metab_10977	yes	down	C19837	neg	771-50-6	206.046	1.84355	M+FA-H	C9H7NO2	35.3	-	HMDB0003320	-	-	-	-	-	Organoheterocyclic compounds	Indoles and derivatives	Indolecarboxylic acids and derivatives	35.3	-	-	-	1.1056	1.102	0.9358	0.02928	0.1621	4.1335	3.8872	3.9135	4.2032	4.2599	4.2896
neg_2019	Cinnamtannin B2	metab_11019	yes	up	C17629	neg	88038-12-4	575.12	1.88938	M-2H	C60H48O24	-	34	HMDB0037668	-	-	-	-	-	Lipids and lipid-like molecules	Prenol lipids	Monoterpenoids	-	34	-	-	3.3976	3.3783	1.7023	1.119e-05	0.002033	5.3815	5.3357	5.3763	3.2283	2.99	3.2357
neg_2026	4,6,7-trihydroxy-2H-chromen-2-one	metab_11026	yes	up	-	neg	-	193.013	1.91197	M-H	C9H6O5	-	65.7	-	-	-	-	-	-	-	-	-	-	65.7	-	-	1.4735	1.4645	1.1514	0.001656	0.03443	3.1756	3.3473	3.2664	2.7917	2.8867	2.8235
neg_2049	Cinnamtannin A2	metab_11049	yes	up	C17625	neg	86631-38-1	576.127	1.93463	M-2H	C60H50O24	-	49.9	HMDB0037661	-	-	-	-	-	Phenylpropanoids and polyketides	Flavonoids	Biflavonoids and polyflavonoids	-	49.9	-	-	4.5825	4.5576	4.5675	1.767e-08	3.999e-05	5.0987	5.131	5.1987	1.1221	1.1311	1.125
neg_2076	Asparaginyl-Phenylalanine	metab_11076	yes	up	-	neg	-	278.115	1.97887	M-H	C13H17N3O4	-	66.9	HMDB0028738	-	-	-	-	-	Organic acids and derivatives	Carboxylic acids and derivatives	Amino acids, peptides, and analogues	-	66.9	-	-	1.9344	1.9134	1.4286	0.03558	0.1803	2.7571	3.1418	2.5021	2.1228	2.1854	1.571
neg_2113	Cinnamtannin II	metab_11113	yes	up	C17626	neg	86631-39-2	720.159	2.023	M-2H	C75H62O30	-	54.4	HMDB0037659	-	-	-	-	-	Phenylpropanoids and polyketides	Flavonoids	Biflavonoids and polyflavonoids	-	54.4	-	-	4.1113	4.0865	2.6599	0.0001324	0.007951	5.1589	5.2332	5.2799	2.4069	1.7758	1.7086
neg_2116	3-O-p-Coumaroylquinic acid	metab_11116	yes	up	-	neg	-	337.093	2.04542	M-H	C16H18O8	-	69.2	HMDB0029681	-	-	-	-	-	Organic oxygen compounds	Organooxygen compounds	Alcohols and polyols	-	69.2	-	-	2.266	2.2583	1.4411	0.003999	0.05642	3.3005	3.3989	3.4951	2.035	2.5812	2.4585
neg_2125	Phlorisobutyrophenone 2-glucoside	metab_11125	yes	up	-	neg	17004-75-0	357.119	2.06765	M-H	C16H22O9	-	33.9	HMDB0029651	-	-	-	-	-	Organic oxygen compounds	Organooxygen compounds	Carbohydrates and carbohydrate conjugates	-	33.9	-	-	1.7154	1.7123	1.2603	0.004968	0.06236	2.9585	2.7264	3.0454	2.2758	2.2443	2.4057
neg_2130	Luteolin	metab_11130	yes	up	C01514	neg	491-70-3	285.041	2.0893	M-H	C15H10O6	49.4	-	LMPK12110006;HMDB0005800	-	-	map01100;map00941;map01110;map00944	Metabolism;Metabolism;Metabolism;Metabolism	Global and overview maps;Biosynthesis of other secondary metabolites;Global and overview maps;Biosynthesis of other secondary metabolites	Phenylpropanoids and polyketides	Flavonoids	Flavones	49.4	-	Metabolic pathways;Flavonoid biosynthesis;Biosynthesis of secondary metabolites;Flavone and flavonol biosynthesis	Metabolic pathways;Flavonoid biosynthesis;Biosynthesis of secondary metabolites;Flavone and flavonol biosynthesis	1.9349	1.9222	1.4176	0.007612	0.08162	2.4295	2.7969	2.5956	2.0111	1.6286	1.8769
neg_2181	Gamma-Diosphenol	metab_11181	yes	up	-	neg	54783-36-7	213.113	2.20167	M+FA-H	C10H16O2	-	38.5	HMDB0037014	-	-	-	-	-	Lipids and lipid-like molecules	Prenol lipids	Monoterpenoids	-	38.5	-	-	1.6434	1.6348	1.1859	0.03082	0.1655	3.7537	3.8278	4.0134	3.5608	3.2379	2.978
neg_2184	Jasmolone glucoside	metab_11184	yes	down	-	neg	-	387.166	2.20167	M+FA-H	C17H26O7	-	48.4	HMDB0032870	-	-	-	-	-	Organic oxygen compounds	Organooxygen compounds	Carbohydrates and carbohydrate conjugates	-	48.4	-	-	1.5943	1.5872	0.8426	0.007079	0.078	2.9748	2.7631	2.6808	3.2329	3.3355	3.4207
neg_2203	D-1-Deoxy-erythro-hexo-2,3-diulose	metab_11203	yes	up	-	neg	-	183.029	2.24608	M+Na-2H	C6H10O5	-	65.2	HMDB0029934	-	-	-	-	-	Organic oxygen compounds	Organooxygen compounds	Carbohydrates and carbohydrate conjugates	-	65.2	-	-	1.0017	0.9936	1.0761	0.004884	0.06231	2.8451	2.9154	2.8461	2.7086	2.6151	2.6757
neg_2238	3-Methyl-3-butenyl apiosyl-(1->6)-glucoside	metab_11238	yes	down	-	neg	198832-72-3	379.161	2.33608	M-H	C16H28O10	-	56.9	HMDB0031954	-	-	-	-	-	Lipids and lipid-like molecules	Fatty Acyls	Fatty acyl glycosides	-	56.9	-	-	1.1553	1.1467	0.9129	0.002777	0.04643	2.7857	2.7178	2.8235	3.0887	2.9987	3.0369
neg_2249	Gentiobiosyl 2-methyl-6-oxo-2E,4E-heptadienoate	metab_11249	yes	up	-	neg	-	459.151	2.3586	M-H2O-H	C20H30O13	-	37.6	HMDB0032134	-	-	-	-	-	Organic oxygen compounds	Organooxygen compounds	Carbohydrates and carbohydrate conjugates	-	37.6	-	-	1.0527	1.0469	1.0581	0.02685	0.1547	4.4117	4.4657	4.5128	4.3485	4.141	4.1644
neg_2386	7-hydroxy-1-oxo-1H-isochromene-3-carboxylic acid	metab_11386	yes	up	-	neg	-	205.014	2.61043	M-H	C10H6O5	-	61.9	-	-	-	-	-	-	-	-	-	-	61.9	-	-	1.6161	1.6061	1.2899	0.03369	0.1744	2.5881	2.7175	2.5424	2.0532	1.7089	2.3224
neg_2498	Rhoifolin	metab_11498	yes	up	C12627	neg	17306-46-6	623.163	2.79372	M+FA-H	C27H30O14	-	62.5	HMDB0038848;HMDB0303149	-	-	map00944	Metabolism	Biosynthesis of other secondary metabolites	Phenylpropanoids and polyketides	Flavonoids	Flavonoid glycosides	-	62.5	Flavone and flavonol biosynthesis	Flavone and flavonol biosynthesis	1.7178	1.7101	1.1672	0.006191	0.07208	4.103	4.2897	4.2594	3.4978	3.5311	3.8098
neg_2508	7-Hydroxy-2-methyl-4-oxo-4H-1-benzopyran-5-carboxylic acid	metab_11508	yes	up	-	neg	-	219.029	2.83958	M-H	C11H8O5	-	73.5	HMDB0036346	-	-	-	-	-	Organoheterocyclic compounds	Benzopyrans	1-benzopyrans	-	73.5	-	-	1.6747	1.6639	1.295	0.0322	0.1702	2.4411	3.0605	2.7696	2.2481	2.1549	1.9843
neg_2591	5-Hydroxyconiferyl alcohol	metab_11591	yes	up	C12205	neg	1782-47-4	391.14	2.9984	2M-H	C10H12O4	-	53.9	HMDB0060398	-	-	map00940;map01110	Metabolism;Metabolism	Biosynthesis of other secondary metabolites;Global and overview maps	Benzenoids	Phenols	Methoxyphenols	-	53.9	Phenylpropanoid biosynthesis;Biosynthesis of secondary metabolites	Phenylpropanoid biosynthesis;Biosynthesis of secondary metabolites	2.9588	2.9523	3.1177	0.0324	0.1708	2.6284	3.0366	3.0678	0.3874	2.1288	0.2847
neg_2654	Quercetin-3-glucoside	metab_11654	yes	up	C05623	neg	482-35-9	463.089	3.1481	M-H	C21H20O12	97.1	-	HMDB0037362;HMDB0247252	-	-	map01100;map01110;map00944	Metabolism;Metabolism;Metabolism	Global and overview maps;Global and overview maps;Biosynthesis of other secondary metabolites	Phenylpropanoids and polyketides	Flavonoids	Flavonoid glycosides	97.1	-	Metabolic pathways;Biosynthesis of secondary metabolites;Flavone and flavonol biosynthesis	Metabolic pathways;Biosynthesis of secondary metabolites;Flavone and flavonol biosynthesis	3.5407	3.5222	5.1155	0.007367	0.08065	3.2034	3.2653	3.1621	0.1131	0.1154	1.654
neg_2707	Matairesinol	metab_11707	yes	up	C10682	neg	580-72-3	357.134	3.26223	M-H	C20H22O6	36	-	HMDB0035698	-	-	map01100;map01110;map00998	Metabolism;Metabolism;Metabolism	Global and overview maps;Global and overview maps;Biosynthesis of other secondary metabolites	Lignans, neolignans and related compounds	Furanoid lignans	Tetrahydrofuran lignans	36	-	Metabolic pathways;Biosynthesis of secondary metabolites;Biosynthesis of various secondary metabolites - part 2	Metabolic pathways;Biosynthesis of secondary metabolites;Biosynthesis of various secondary metabolites - part 2	1.7499	1.735	1.2593	0.004515	0.05951	3.1048	3.0818	2.7748	2.36	2.3923	2.3631
neg_2719	5,7-Dihydroxy-4'-methoxy-8-methylisoflavanone	metab_11719	yes	up	-	neg	163021-16-7	345.098	3.28508	M+FA-H	C17H16O5	-	43.4	HMDB0041322	-	-	-	-	-	Phenylpropanoids and polyketides	Isoflavonoids	O-methylated isoflavonoids	-	43.4	-	-	2.7127	2.6988	1.8283	1.336e-05	0.00216	3.0227	3.1222	3.2119	1.7019	1.7114	1.7049
neg_2768	6,7-Dihydroxycoumarin	metab_11768	yes	up	C09263	neg	305-01-1	177.018	3.39918	M-H	C9H6O4	57.7	-	HMDB0030819	-	-	-	-	-	Phenylpropanoids and polyketides	Coumarins and derivatives	Hydroxycoumarins	57.7	-	-	-	1.3892	1.3861	1.1204	0.01482	0.1166	3.9826	3.6865	3.833	3.4017	3.343	3.5218
neg_2778	Orientin 7,3'-dimethyl ether	metab_11778	yes	up	-	neg	89915-55-9	457.114	3.422	M-H2O-H	C23H24O11	-	77.1	HMDB0037450;LMPK12111047	-	-	-	-	-	Phenylpropanoids and polyketides	Flavonoids	Flavonoid glycosides	-	77.1	-	-	3.9923	3.9702	2.7687	9.809e-07	0.0004645	4.6538	4.8311	4.8437	1.7213	1.7307	1.7243
neg_2826	Eriodictyol-7-O-glucoside	metab_11826	yes	up	-	neg	38965-51-4	449.11	3.51303	M-H	C21H22O11	92.9	-	HMDB0029544	-	-	-	-	-	Benzenoids	Benzene and substituted derivatives	Benzoic acids and derivatives	92.9	-	-	-	1.6909	1.6781	1.3391	0.04019	0.1901	2.2752	2.9984	2.4515	1.919	1.9285	1.922
neg_2872	3-Dehydroquinate	metab_11872	yes	up	C00944	neg	10534-44-8	211.024	3.62702	M+Na-2H	C7H10O6	-	69.6	HMDB0012710	-	-	map01100;map00400;map01110;map01230	Metabolism;Metabolism;Metabolism;Metabolism	Global and overview maps;Amino acid metabolism;Global and overview maps;Global and overview maps	Organic acids and derivatives	Hydroxy acids and derivatives	Alpha hydroxy acids and derivatives	-	69.6	Metabolic pathways;Phenylalanine, tyrosine and tryptophan biosynthesis;Biosynthesis of secondary metabolites;Biosynthesis of amino acids	Metabolic pathways;Phenylalanine, tyrosine and tryptophan biosynthesis;Biosynthesis of secondary metabolites;Biosynthesis of amino acids	1.6297	1.6209	1.1825	8.065e-05	0.005662	3.2668	3.3287	3.356	2.837	2.7806	2.798
neg_2878	Marmesin rhamnoside	metab_11878	yes	up	-	neg	142347-99-7	373.129	3.62702	M-H2O-H	C20H24O8	-	74.6	HMDB0039564	-	-	-	-	-	Phenylpropanoids and polyketides	Coumarins and derivatives	Furanocoumarins	-	74.6	-	-	2.8372	2.8226	1.5945	6.805e-05	0.005076	4.0131	4.222	4.2452	2.5215	2.7028	2.6021
neg_2954	9S-hydroxy-11,15-dioxo-5Z,13E-prostadienoic acid	metab_11954	yes	up	C04758	neg	-	395.207	3.83205	M+FA-H	C20H30O5	-	40.2	HMDB0062297;LMFA03010206	-	-	-	-	-	Lipids and lipid-like molecules	Fatty Acyls	Eicosanoids	-	40.2	-	-	1.4317	1.4325	1.0953	0.01027	0.09404	5.0324	4.7748	5.059	4.4746	4.5313	4.5659
neg_3089	Syringaldehyde	metab_12089	yes	down	-	neg	-	181.05	4.24142	M-H	C9H10O4	66	-	HMDB0258653	-	-	-	-	-	Benzenoids	Phenols	Methoxyphenols	66	-	-	-	1.5447	1.5397	0.8765	0.01553	0.1196	3.8642	3.4684	3.5313	4.1596	4.1578	4.075
neg_3125	2-(3,5-dihydroxyphenyl)-3,5,6,7-tetrahydroxy-4H-chromen-4-one	metab_12125	yes	up	-	neg	-	299.02	4.37797	M-H2O-H	C15H10O8	-	45.9	-	-	-	-	-	-	-	-	-	-	45.9	-	-	2.819	2.8036	1.8956	0.0009924	0.02513	3.0294	3.3935	3.4876	1.9726	1.6313	1.6249
neg_3130	Phenylalanyl-Valine	metab_12130	yes	up	-	neg	3918-90-9	527.286	4.40073	2M-H	C14H20N2O3	-	58.4	HMDB0029008	-	-	-	-	-	Organic acids and derivatives	Carboxylic acids and derivatives	Amino acids, peptides, and analogues	-	58.4	-	-	1.8189	1.8123	1.1898	0.009525	0.09128	4.0479	4.4605	4.4665	3.5316	3.692	3.6802
neg_3245	Tetranor 12-HETE	metab_12245	yes	down	-	neg	-	287.165	4.94718	M+Na-2H	C16H26O3	-	57.3	HMDB0060055	-	-	-	-	-	Lipids and lipid-like molecules	Fatty Acyls	Fatty acids and conjugates	-	57.3	-	-	1.9189	1.9101	0.6756	0.03632	0.1817	2.175	1.5283	1.5322	2.3024	2.5754	2.8715
neg_3352	Cibaric acid	metab_12352	yes	down	-	neg	130523-93-2	305.176	5.58167	M-H2O-H	C18H28O5	-	57.1	HMDB0038580;LMFA02000289	-	-	-	-	-	Lipids and lipid-like molecules	Fatty Acyls	Lineolic acids and derivatives	-	57.1	-	-	1.5467	1.5396	0.8595	0.04439	0.199	3.4545	3.4057	3.3393	3.7615	3.7714	4.3336
neg_3584	9-OxoOTrE	metab_12584	yes	up	-	neg	-	291.197	7.00158	M-H	C18H28O3	57	-	-	-	-	-	-	-	-	-	-	57	-	-	-	1.3211	1.3137	1.0869	0.01889	0.1288	4.5394	4.8335	4.7373	4.2816	4.4218	4.2766
neg_3653	PE(18:3/0:0)	metab_12652	yes	down	-	neg	-	474.263	7.27345	M-H	C23H42NO7P	96.5	-	-	-	-	-	-	-	-	-	-	96.5	-	-	-	1.2897	1.2801	0.9263	0.0037	0.05413	4.1925	4.1841	4.2113	4.4296	4.6163	4.543
neg_3677	Eriojaposide B	metab_12676	yes	down	C17889	neg	351412-97-0	561.256	7.35287	M+FA-H	C25H40O11	-	69.9	HMDB0038029	-	-	-	-	-	Lipids and lipid-like molecules	Fatty Acyls	Fatty acyl glycosides	-	69.9	-	-	1.8371	1.8263	0.8223	0.01292	0.1079	3.4103	3.2526	3.2039	3.7115	4.2395	4.0505
neg_3876	CPA(16:0/0:0)	metab_12875	yes	up	-	neg	-	391.226	8.34532	M-H	C19H37O6P	-	90.5	HMDB0007003	-	-	-	-	-	Lipids and lipid-like molecules	Glycerophospholipids	Glycerophosphates	-	90.5	-	-	1.364	1.3532	1.0762	0.006801	0.07631	5.4066	5.4246	5.2753	4.9298	4.9337	5.1029
neg_3926	LysoPC(17:0)	metab_12925	yes	down	C04230	neg	50930-23-9	508.341	8.52895	M-H	C25H52NO7P	-	55.4	HMDB0012108	Lipids	Phospholipids	map00564	Metabolism	Lipid metabolism	Lipids and lipid-like molecules	Glycerophospholipids	Glycerophosphocholines	-	55.4	Glycerophospholipid metabolism	Glycerophospholipid metabolism	1.1223	1.1148	0.9493	5.998e-05	0.004812	4.5002	4.4897	4.5326	4.7556	4.7517	4.7407
neg_3963	PE(18:0/0:0)	metab_12962	yes	down	-	neg	-	480.31	8.6433	M-H	C23H48NO7P	66.8	-	LMGP02050001	-	-	-	-	-	-	-	-	66.8	-	-	-	1.05	1.0431	0.9609	0.0008668	0.02311	5.3154	5.2415	5.273	5.4757	5.4876	5.5134
neg_3988	(3beta,5alpha,9alpha,14alpha,22E,24R)-3,5,9,14-Tetrahydroxyergosta-7,22-dien-6-one	metab_12987	yes	up	-	neg	211486-14-5	441.301	8.73403	M-H2O-H	C28H44O5	-	39.9	HMDB0032690	-	-	-	-	-	Lipids and lipid-like molecules	Steroids and steroid derivatives	Ergostane steroids	-	39.9	-	-	1.6949	1.6831	1.1513	0.005855	0.06982	4.3483	4.526	4.4823	4.0498	3.823	3.7292
neg_4282	GPA(18:2/18:2)	metab_13281	yes	up	-	neg	-	695.466	10.1283	M-H	C39H69O8P	79.4	-	-	-	-	-	-	-	-	-	-	79.4	-	-	-	1.4049	1.3994	1.0892	0.03655	0.1824	5.4936	5.4465	5.5521	5.1017	4.7773	5.2617
neg_5122	PE-NMe(18:0/18:2(9Z,12Z))	metab_14121	yes	down	C01241	neg	-	802.561	10.307	M+FA-H	C42H80NO8P	-	44.9	HMDB0113089;PW_C059212	-	-	-	-	-	Lipids and lipid-like molecules	Glycerophospholipids	Glycerophosphoethanolamines	-	44.9	-	-	1.3367	1.3331	0.9292	0.02395	0.1453	5.1407	5.1784	5.1501	5.5009	5.3863	5.7588
neg_5124	GPA(18:1/18:2)	metab_14123	yes	up	-	neg	-	697.482	10.307	M-H	C39H71O8P	85.2	-	-	-	-	-	-	-	-	-	-	85.2	-	-	-	1.6515	1.6418	1.1181	0.01817	0.1282	5.4655	5.6288	5.5525	5.1332	4.6765	5.0804
neg_5127	PE-NMe(18:1(11Z)/20:2(11Z,14Z))	metab_14126	yes	down	C01241	neg	-	828.576	10.2749	M+FA-H	C44H82NO8P	-	56.4	HMDB0113122;PW_C059245	-	-	-	-	-	Lipids and lipid-like molecules	Glycerophospholipids	Glycerophosphoethanolamines	-	56.4	-	-	1.4767	1.4789	0.9199	0.01528	0.1184	5.2646	5.4867	5.3006	5.8299	5.6524	5.9699
neg_5324	Annomuricin-D-one	metab_14323	yes	down	-	neg	-	633.438	9.31478	M+Na-2H	C35H64O8	-	70.4	HMDB0030890	-	-	-	-	-	Lipids and lipid-like molecules	Fatty Acyls	Fatty alcohols	-	70.4	-	-	1.3284	1.3315	0.9078	0.03276	0.1716	4.0222	4.0898	3.7952	4.453	4.1947	4.467
neg_5539	(+)-15,16-Dihydroxyoctadecanoic acid	metab_14538	yes	down	-	neg	-	297.243	8.6433	M-H2O-H	C18H36O4	-	33.9	HMDB0031008	-	-	-	-	-	Lipids and lipid-like molecules	Fatty Acyls	Fatty acids and conjugates	-	33.9	-	-	1.3727	1.3664	0.9249	0.01607	0.122	5.091	4.9668	4.8648	5.2557	5.3584	5.5194
neg_5580	2-hydroxyhexadecanoic acid	metab_14579	yes	down	-	neg	16452-52-1	271.228	8.52895	M-H	C16H32O3	75.2	-	HMDB0031057	-	-	-	-	-	Lipids and lipid-like molecules	Fatty Acyls	Fatty acids and conjugates	75.2	-	-	-	1.1834	1.1786	0.9422	0.02946	0.1626	5.2689	5.0201	5.0176	5.3807	5.3621	5.5036
neg_5598	CPA(18:1(11Z)/0:0)	metab_14597	yes	up	-	neg	-	417.241	8.4601	M-H	C21H39O6P	-	67.3	HMDB0007005	-	-	-	-	-	Lipids and lipid-like molecules	Glycerophospholipids	Glycerophosphates	-	67.3	-	-	1.1602	1.151	1.0606	0.007779	0.08238	4.8455	4.8734	4.7663	4.5165	4.4966	4.6428
neg_5621	2-Pentadecylfuran	metab_14620	yes	down	-	neg	59958-20-2	323.259	8.41408	M+FA-H	C19H34O	-	66.8	HMDB0033609	-	-	-	-	-	Organoheterocyclic compounds	Heteroaromatic compounds	Not Available	-	66.8	-	-	1.4424	1.438	0.91	0.001115	0.02686	4.1468	4.1807	4.1131	4.625	4.4721	4.5747
neg_5639	Pravastatin	metab_14638	yes	up	C01844	neg	81093-37-0	459.213	8.34532	M+Cl	C23H36O7	-	46.7	HMDB0256737;LMFA05000695;PW_C002369;HMDB0005022	-	-	-	-	-	Organoheterocyclic compounds	Lactones	Delta valerolactones	-	46.7	-	-	1.5083	1.497	1.1204	0.004524	0.05951	4.2868	4.3406	4.1862	3.7413	3.752	3.9434
neg_5765	MG(0:0/a-17:0/0:0)[rac]	metab_14764	yes	down	-	neg	-	365.27	7.89978	M+Na-2H	C20H40O4	-	64.5	HMDB0072848	-	-	-	-	-	Lipids and lipid-like molecules	Glycerolipids	Monoradylglycerols	-	64.5	-	-	1.3304	1.3257	0.863	0.009248	0.09045	2.4585	2.2569	2.2609	2.6694	2.7735	2.6377
neg_5923	LysoPC(16:1(9Z)/0:0)	metab_14922	yes	down	C04230	neg	76790-27-7	538.315	7.37588	M+FA-H	C24H48NO7P	-	78.7	HMDB0010383	Lipids	Phospholipids	map00564	Metabolism	Lipid metabolism	Lipids and lipid-like molecules	Glycerophospholipids	Glycerophosphocholines	-	78.7	Glycerophospholipid metabolism	Glycerophospholipid metabolism	1.0052	0.9979	0.9585	0.006427	0.07387	4.7813	4.6604	4.7532	4.9286	4.9666	4.9173
neg_5961	3-?Methyl-?5-?propyl-2-?furantridecanoic acid	metab_14960	yes	down	-	neg	-	381.265	7.29117	M+FA-H	C21H36O3	-	58.7	HMDB0112079	-	-	-	-	-	Lipids and lipid-like molecules	Fatty Acyls	Fatty acids and conjugates	-	58.7	-	-	1.8763	1.8658	0.8445	0.003602	0.0535	4.0642	3.7006	3.7725	4.4925	4.5698	4.5984
neg_6000	LysoPA(20:3(8Z,11Z,14Z)/0:0)	metab_14999	yes	down	-	neg	-	505.257	7.18657	M+FA-H	C23H41O7P	-	37.3	HMDB0114759	-	-	-	-	-	Lipids and lipid-like molecules	Glycerophospholipids	Glycerophosphates	-	37.3	-	-	1.4135	1.4078	0.896	0.02091	0.1348	3.9025	3.6333	3.6885	4.0436	4.3307	4.1504
neg_6206	Hydroxypelenolide	metab_15205	yes	down	-	neg	17909-94-3	251.165	6.31037	M-H	C15H24O3	-	75.2	HMDB0036663	-	-	-	-	-	Lipids and lipid-like molecules	Prenol lipids	Terpene lactones	-	75.2	-	-	1.0774	1.0751	0.9198	0.01154	0.1014	2.8914	2.7835	2.7206	3.0206	3.0915	3.0177
neg_6784	Eriodictyol	metab_15782	yes	up	C05631	neg	552-58-9	287.056	3.96858	M-H	C15H12O6	82.5	-	HMDB0005810;LMPK12140002	-	-	map01100;map00941;map01110	Metabolism;Metabolism;Metabolism	Global and overview maps;Biosynthesis of other secondary metabolites;Global and overview maps	Phenylpropanoids and polyketides	Flavonoids	Flavans	82.5	-	Metabolic pathways;Flavonoid biosynthesis;Biosynthesis of secondary metabolites	Metabolic pathways;Flavonoid biosynthesis;Biosynthesis of secondary metabolites	1.8859	1.8791	1.2208	0.0003724	0.01392	3.9258	3.7142	3.8553	3.1352	3.1448	3.1382
neg_6815	1-O-Feruloylglucose	metab_15813	yes	up	-	neg	7196-71-6	377.088	3.90032	M+Na-2H	C16H20O9	-	66.2	HMDB0036938	-	-	-	-	-	Phenylpropanoids and polyketides	Cinnamic acids and derivatives	Hydroxycinnamic acids and derivatives	-	66.2	-	-	1.5365	1.5479	1.2298	0.03924	0.1881	3.1878	2.6156	2.962	2.2942	2.5166	2.3186
neg_6835	8-iso-15-keto-PGE2	metab_15833	yes	up	-	neg	914804-63-0	349.202	3.85477	M-H	C20H30O5	36.1	-	HMDB0002341;LMFA03110009	-	-	-	-	-	Lipids and lipid-like molecules	Fatty Acyls	Eicosanoids	36.1	-	-	-	1.1589	1.1588	1.07	0.01464	0.1156	4.4677	4.3043	4.43	4.0222	4.1258	4.1917
neg_6878	4''-O-Acetylafzelin	metab_15876	yes	up	-	neg	135618-17-6	519.114	3.74102	M+FA-H	C23H22O11	-	45.9	HMDB0039746	-	-	-	-	-	Phenylpropanoids and polyketides	Flavonoids	Flavonoid glycosides	-	45.9	-	-	2.487	2.4746	1.6063	4.951e-06	0.0014	3.0969	3.1168	3.2126	1.9516	1.9612	1.9547
neg_6890	Azlocillin	metab_15888	yes	up	C06839	neg	37091-66-0	496.11	3.71818	M+Cl	C20H23N5O6S	-	40.1	HMDB0015194	-	-	-	-	-	Organic acids and derivatives	Carboxylic acids and derivatives	Amino acids, peptides, and analogues	-	40.1	-	-	4.189	4.1679	15.9016	2.444e-06	0.0008732	3.4945	3.5135	3.7587	0.2239	0.2279	0.2252
neg_6895	Oryzalide B	metab_15893	yes	up	-	neg	134885-94-2	365.197	3.71818	M+FA-H	C19H28O4	-	40.3	HMDB0037592	-	-	-	-	-	Lipids and lipid-like molecules	Prenol lipids	Terpene lactones	-	40.3	-	-	1.4127	1.4038	1.0922	0.01028	0.09404	4.9396	4.9781	4.8653	4.3709	4.4995	4.6642
neg_6969	Malvidin 3-O-glucoside	metab_15967	yes	up	C12140	neg	18470-06-9;7228-78-6	491.12	3.55868	M-H	C23H24O12	66.7	-	HMDB0030777	-	-	map00942	Metabolism	Biosynthesis of other secondary metabolites	Phenylpropanoids and polyketides	Flavonoids	Flavonoid glycosides	66.7	-	Anthocyanin biosynthesis	Anthocyanin biosynthesis	1.4917	1.4828	1.1142	0.0005715	0.01813	4.1572	4.2991	4.2414	3.7785	3.792	3.826
neg_6982	6-Thioinosine-5'-monophosphate	metab_15980	yes	up	C04646	neg	53-83-8	409.024	3.53592	M+FA-H	C10H13N4O7PS	-	52.3	PW_C040504;HMDB0060416	-	-	-	-	-	Nucleosides, nucleotides, and analogues	Purine nucleotides	Purine ribonucleotides	-	52.3	-	-	1.8545	1.8436	1.1474	0.0006271	0.01935	5.169	5.2559	5.2434	4.6196	4.6109	4.425
neg_6999	Vanillic acid-4-O-glucuronide	metab_15997	yes	up	-	neg	18191-12-3	363.072	3.51303	M+Na-2H	C15H18O9	-	84.7	HMDB0060024	-	-	-	-	-	Organic oxygen compounds	Organooxygen compounds	Carbohydrates and carbohydrate conjugates	-	84.7	-	-	3.2516	3.2378	7.1067	0.0002396	0.01145	2.6827	2.1143	2.3577	0.3333	0.3385	0.335
neg_7002	2-O-(6-Phospho-alpha-mannosyl)-D-glycerate	metab_16000	yes	up	C16699	neg	-	329.03	3.51303	M-H2O-H	C9H17O12P	-	73.6	HMDB0012152	-	-	-	-	-	Organic oxygen compounds	Organooxygen compounds	Carbohydrates and carbohydrate conjugates	-	73.6	-	-	2.8311	2.8202	12.4374	0.0001464	0.008644	1.6636	1.5119	1.8906	0.1346	0.1372	0.1354
neg_7018	3,5,6,7-tetrahydroxy-2-phenyl-3,4-dihydro-2H-1-benzopyran-4-one	metab_16016	yes	up	-	neg	-	287.056	3.49032	M-H	C15H12O6	-	49.5	-	-	-	-	-	-	-	-	-	-	49.5	-	-	3.0147	3.0004	1.972	0.004014	0.05642	3.7877	3.6326	3.7617	1.5802	1.5897	2.5007
neg_7096	Hesperetin	metab_16094	yes	up	C01709	neg	520-33-2	347.077	3.35355	M+FA-H	C16H14O6	-	74.2	HMDB0005782;LMPK12140003	-	-	map00941	Metabolism	Biosynthesis of other secondary metabolites	Phenylpropanoids and polyketides	Flavonoids	O-methylated flavonoids	-	74.2	Flavonoid biosynthesis	Flavonoid biosynthesis	2.0817	2.0715	1.3286	0.001818	0.03615	3.3221	3.5678	3.5401	2.4925	2.7851	2.5724
neg_7144	3-(3-hydroxyphenyl)-7-methoxy-3,4-dihydro-2H-1-benzopyran-4-one	metab_16142	yes	up	-	neg	-	315.088	3.28508	M+FA-H	C16H14O4	-	68.6	-	-	-	-	-	-	-	-	-	-	68.6	-	-	3.4181	3.4026	2.3832	1.498e-05	0.002331	3.8848	3.7053	4.0137	1.6188	1.6282	1.6218
neg_7156	Gibberellin A86	metab_16154	yes	up	-	neg	138703-93-2	401.124	3.26223	M+Na-2H	C19H24O8	-	76.2	HMDB0038450	-	-	-	-	-	Lipids and lipid-like molecules	Prenol lipids	Diterpenoids	-	76.2	-	-	2.4323	2.4214	1.5175	0.01765	0.1268	3.7354	3.8619	3.6095	1.8247	2.7965	2.7655
neg_7175	Gly Leu Phe	metab_16173	yes	up	-	neg	-	334.177	3.23945	M-H	C17H25N3O4	74	-	-	-	-	-	-	-	-	-	-	74	-	-	-	1.6067	1.592	1.1959	0.008065	0.08372	3.196	3.4214	3.0871	2.6361	2.7892	2.6905
neg_7176	2,4',5,7-Tetrahydroxyflavanone	metab_16174	yes	up	-	neg	58124-18-8	333.062	3.23945	M+FA-H	C15H12O6	-	87.9	HMDB0040314	-	-	-	-	-	Phenylpropanoids and polyketides	Flavonoids	Hydroxyflavonoids	-	87.9	-	-	2.1591	2.1548	1.6208	0.02773	0.1569	2.0962	3.0279	3.006	1.6676	1.6771	1.6706
neg_7288	Daphnetin	metab_16286	yes	up	C03093	neg	486-35-1	177.018	3.05855	M-H	C9H6O4	82.7	-	-	-	-	-	-	-	-	-	-	82.7	-	-	-	1.293	1.2834	1.1007	0.0004123	0.01465	3.5674	3.5581	3.4974	3.2527	3.1824	3.2161
neg_7317	5-Methoxysalicylic acid	metab_16315	yes	up	-	neg	2612-02-04	167.034	2.9984	M-H	C8H8O4	70.9	-	HMDB0001868	-	-	-	-	-	Benzenoids	Benzene and substituted derivatives	Benzoic acids and derivatives	70.9	-	-	-	1.5073	1.4979	1.1064	0.0009478	0.02437	4.5352	4.7108	4.6361	4.1843	4.176	4.1864
neg_7350	Camellianin A	metab_16348	yes	up	-	neg	109232-77-1	665.175	2.93103	M+FA-H	C29H32O15	-	79.9	HMDB0029908	-	-	-	-	-	Phenylpropanoids and polyketides	Flavonoids	Flavonoid glycosides	-	79.9	-	-	2.5665	2.5566	1.4379	0.0173	0.1254	4.4987	4.6569	4.8032	3.1974	2.648	3.862
neg_7359	Sinapic acid	metab_16357	yes	up	C00482	neg	7361-90-2;7362-37-0;530-59-6;7362-37-0	223.061	2.93103	M-H	C11H12O5	94.4	-	HMDB0032616;HMDB0034069	-	-	map01100;map00940;map01110	Metabolism;Metabolism;Metabolism	Global and overview maps;Biosynthesis of other secondary metabolites;Global and overview maps	Phenylpropanoids and polyketides	Cinnamic acids and derivatives	Hydroxycinnamic acids and derivatives	94.4	-	Metabolic pathways;Phenylpropanoid biosynthesis;Biosynthesis of secondary metabolites	Metabolic pathways;Phenylpropanoid biosynthesis;Biosynthesis of secondary metabolites	1.5999	1.5956	1.1436	0.00672	0.07577	4.103	4.1811	4.334	3.6266	3.5788	3.8291
neg_7446	Gamma-Glutamylphenylalanine	metab_16444	yes	up	-	neg	7432-24-8	275.104	2.81658	M-H2O-H	C14H18N2O5	-	68.3	HMDB0000594	-	-	-	-	-	Organic acids and derivatives	Carboxylic acids and derivatives	Amino acids, peptides, and analogues	-	68.3	-	-	1.3257	1.3178	1.1243	0.03071	0.1653	3.5707	3.5608	3.5074	3.2867	3.2577	2.9186
neg_7512	Apigenin 7-[galactosyl-(1->4)-mannoside]	metab_16510	yes	up	-	neg	84638-36-8	593.152	2.72493	M-H	C27H30O15	-	88.2	HMDB0037852	-	-	-	-	-	Organic acids and derivatives	Carboxylic acids and derivatives	Carboxylic acid derivatives	-	88.2	-	-	1.5288	1.5199	1.0993	0.0002604	0.01183	4.9972	5.0547	4.992	4.5103	4.6182	4.5578
neg_7525	Cordeauxione	metab_16523	yes	up	-	neg	1228-77-9	273.041	2.72493	M-H2O-H	C14H12O7	-	61.3	HMDB0034310	-	-	-	-	-	Organic acids and derivatives	Vinylogous acids	Not Available	-	61.3	-	-	2.073	2.073	1.7042	0.01525	0.1184	2.0885	1.9465	2.6893	1.3113	1.3205	1.3143
neg_7533	Norrubrofusarin 6-beta-gentiobioside	metab_16531	yes	up	-	neg	-	563.141	2.70208	M-H2O-H	C26H30O15	-	77.8	HMDB0034570	-	-	-	-	-	Organoheterocyclic compounds	Naphthopyrans	Naphthopyranones	-	77.8	-	-	1.0083	1.0032	1.0362	0.00126	0.02909	5.7137	5.7288	5.7145	5.5071	5.5653	5.484
neg_7559	2,4,6-trihydroxy-2-[(4-hydroxyphenyl)methyl]-2,3-dihydro-1-benzofuran-3-one	metab_16557	yes	up	-	neg	-	287.056	2.6791	M-H	C15H12O6	-	63.5	-	-	-	-	-	-	-	-	-	-	63.5	-	-	2.6297	2.6173	1.4829	2.126e-05	0.002577	4.0598	4.0464	4.138	2.6633	2.8375	2.7558
neg_7601	Butyl salicylate	metab_16599	yes	up	-	neg	2052-14-4	239.092	2.63327	M+FA-H	C11H14O3	-	51.8	HMDB0040730	-	-	-	-	-	Benzenoids	Benzene and substituted derivatives	Benzoic acids and derivatives	-	51.8	-	-	1.0752	1.0667	1.0834	0.01628	0.1228	3.2353	3.2013	3.1454	2.9623	2.8446	3.0365
neg_7719	Flavanomarein	metab_16717	yes	down	-	neg	-	449.109	2.47328	M-H	C21H22O11	62.3	-	-	-	-	-	-	-	-	-	-	62.3	-	-	-	1.3346	1.3339	0.8845	0.02438	0.1458	3.1437	3.0942	2.8398	3.4272	3.3127	3.5243
neg_7871	Cystathionine ketimine	metab_16869	yes	down	-	neg	87254-95-3	224.002	2.2909	M+Na-2H	C7H9NO4S	-	36.4	HMDB0002015	-	-	-	-	-	Organic acids and derivatives	Carboxylic acids and derivatives	Amino acids, peptides, and analogues	-	36.4	-	-	1.7549	1.7457	0.7059	0.0001194	0.007576	1.4606	1.4062	1.4101	2.0833	2.0191	1.9587
neg_7883	Pantetheine	metab_16881	yes	down	C00831	neg	496-65-1	277.123	2.26862	M-H	C11H22N2O4S	-	67.4	PW_C001887;HMDB0003426	-	-	map01110;map00770	Metabolism;Metabolism	Global and overview maps;Metabolism of cofactors and vitamins	Organic acids and derivatives	Carboxylic acids and derivatives	Amino acids, peptides, and analogues	-	67.4	Biosynthesis of secondary metabolites;Pantothenate and CoA biosynthesis	Biosynthesis of secondary metabolites;Pantothenate and CoA biosynthesis	1.6411	1.6285	0.8095	0.008667	0.08752	2.5114	2.1347	2.4149	2.8698	2.9545	2.9009
neg_7926	P-Salicylic acid	metab_16924	yes	up	C00156	neg	99-96-7	137.023	2.20167	M-H	C7H6O3	78.3	-	HMDB0000500	-	-	map01100;map00130;map01110;map00790;map01240	Metabolism;Metabolism;Metabolism;Metabolism;Metabolism	Global and overview maps;Metabolism of cofactors and vitamins;Global and overview maps;Metabolism of cofactors and vitamins;Global and overview maps	Benzenoids	Benzene and substituted derivatives	Benzoic acids and derivatives	78.3	-	Metabolic pathways;Ubiquinone and other terpenoid-quinone biosynthesis;Biosynthesis of secondary metabolites;Folate biosynthesis;Biosynthesis of cofactors	Metabolic pathways;Ubiquinone and other terpenoid-quinone biosynthesis;Biosynthesis of secondary metabolites;Folate biosynthesis;Biosynthesis of cofactors	1.6507	1.6394	1.1177	0.000816	0.02261	4.9694	5.1694	5.0487	4.5449	4.5247	4.5212
neg_7942	Procyanidin B2	metab_16940	yes	up	C17639	neg	29106-49-8	577.135	2.1562	M-H	C30H26O12	94.7	-	LMPK12030002;HMDB0033973	-	-	-	-	-	Phenylpropanoids and polyketides	Flavonoids	Biflavonoids and polyflavonoids	94.7	-	-	-	2.6379	2.6245	1.3169	0.0001052	0.006936	5.5677	5.5725	5.6039	4.0997	4.2163	4.3981
neg_7976	(S)C(S)S-S-Methylcysteine sulfoxide	metab_16973	yes	up	-	neg	32726-14-0	452.081	2.11192	3M-H	C4H9NO3S	-	34.2	HMDB0029432	-	-	-	-	-	Organic acids and derivatives	Carboxylic acids and derivatives	Amino acids, peptides, and analogues	-	34.2	-	-	1.5737	1.5609	1.1796	0.004607	0.05991	3.3532	3.3243	3.1368	2.8541	2.7962	2.6695
neg_7983	5-Hydroxy-p-mentha-6,8-dien-2-one	metab_16980	yes	up	-	neg	56423-48-4	211.097	2.11192	M+FA-H	C10H14O2	-	62.9	HMDB0037011	-	-	-	-	-	Lipids and lipid-like molecules	Prenol lipids	Monoterpenoids	-	62.9	-	-	1.9475	1.9358	1.2469	0.01304	0.1084	3.9027	4.0591	4.1718	3.5757	3.1488	3.0069
neg_7996	AESCULIN	metab_16993	yes	up	C09264	neg	531-75-9	339.072	2.0893	M-H	C15H16O9	36.9	-	HMDB0030820	-	-	-	-	-	Phenylpropanoids and polyketides	Coumarins and derivatives	Coumarin glycosides	36.9	-	-	-	1.8818	1.8648	1.3942	0.01811	0.1282	2.5853	2.8908	2.547	2.2139	1.6524	1.8882
neg_8046	Furaneol 4-(6-malonylglucoside)	metab_17042	yes	up	-	neg	-	357.083	2.023	M-H2O-H	C15H20O11	-	72.7	HMDB0029778	-	-	-	-	-	Organic oxygen compounds	Organooxygen compounds	Carbohydrates and carbohydrate conjugates	-	72.7	-	-	1.5681	1.5624	1.2167	0.03825	0.1859	3.3706	2.9757	3.1543	2.5553	2.3767	2.8759
neg_8049	Theogallin	metab_17045	yes	up	C10834	neg	17365-11-6;53584-43-3	325.056	2.023	M-H2O-H	C14H16O10	-	70.7	HMDB0039287	-	-	-	-	-	Organic oxygen compounds	Organooxygen compounds	Alcohols and polyols	-	70.7	-	-	1.4471	1.4439	1.2277	0.0185	0.1282	2.3441	2.4541	2.5469	1.8868	1.8963	2.1997
neg_8058	Vanillin	metab_17054	yes	up	C00755	neg	121-33-5	151.039	2.023	M-H	C8H8O3	41.1	-	HMDB0245834;HMDB0012308;MJDBOTE0000374	-	-	map01100;map01110;map00998	Metabolism;Metabolism;Metabolism	Global and overview maps;Global and overview maps;Biosynthesis of other secondary metabolites	Benzenoids	Phenols	Methoxyphenols	41.1	-	Metabolic pathways;Biosynthesis of secondary metabolites;Biosynthesis of various secondary metabolites - part 2	Metabolic pathways;Biosynthesis of secondary metabolites;Biosynthesis of various secondary metabolites - part 2	1.4539	1.4447	1.1095	0.0002545	0.01178	4.1154	4.1795	4.1328	3.7495	3.771	3.6805
neg_8110	(3,4,5,6-tetrahydroxyoxan-2-yl)methyl 4-hydroxybenzoate	metab_17106	yes	up	-	neg	-	345.083	1.95627	M+FA-H	C13H16O8	-	40.1	-	-	-	-	-	-	-	-	-	-	40.1	-	-	1.5025	1.4908	1.1524	0.02144	0.1372	3.5271	3.8665	3.7002	3.3622	3.2152	3.0489
neg_8138	Lepidimoic acid	metab_17134	yes	down	-	neg	157676-09-0	343.067	1.93463	M+Na-2H	C12H18O10	-	76.1	HMDB0041096	-	-	-	-	-	Organic oxygen compounds	Organooxygen compounds	Carbohydrates and carbohydrate conjugates	-	76.1	-	-	1.0713	1.0627	0.9107	0.0216	0.1373	2.5842	2.4395	2.5928	2.8692	2.7084	2.7857
neg_8145	5,7-Dihydroxy-4H-1-benzopyran-4-one	metab_17141	yes	up	C09001	neg	31721-94-5	223.024	1.93463	M+FA-H	C9H6O4	-	70.2	HMDB0032950	-	-	-	-	-	Organoheterocyclic compounds	Benzopyrans	1-benzopyrans	-	70.2	-	-	1.6435	1.6292	1.2137	0.003822	0.0553	3.0022	3.235	2.9814	2.5953	2.4639	2.5373
neg_8148	L-Tryptophan	metab_17144	yes	up	C00078	neg	73-22-3	203.082	1.93463	M-H	C11H12N2O2	90.1	-	PW_C000741;HMDB0000929	Peptides	Amino acids	map01100;map01110;map00260;map01240;map01210;map00998;map01230;map00966;map00970;map00400;map00380	Metabolism;Metabolism;Metabolism;Metabolism;Metabolism;Metabolism;Metabolism;Metabolism;Genetic Information Processing;Metabolism;Metabolism	Global and overview maps;Global and overview maps;Amino acid metabolism;Global and overview maps;Global and overview maps;Biosynthesis of other secondary metabolites;Global and overview maps;Biosynthesis of other secondary metabolites;Translation;Amino acid metabolism;Amino acid metabolism	Organoheterocyclic compounds	Indoles and derivatives	Indolyl carboxylic acids and derivatives	90.1	-	Metabolic pathways;Biosynthesis of secondary metabolites;Glycine, serine and threonine metabolism;Biosynthesis of cofactors;2-Oxocarboxylic acid metabolism;Biosynthesis of various secondary metabolites - part 2;Biosynthesis of amino acids;Glucosinolate biosynthesis;Aminoacyl-tRNA biosynthesis;Phenylalanine, tyrosine and tryptophan biosynthesis;Tryptophan metabolism	Metabolic pathways;Biosynthesis of secondary metabolites;Glycine, serine and threonine metabolism;Biosynthesis of cofactors;2-Oxocarboxylic acid metabolism;Biosynthesis of various secondary metabolites - part 2;Biosynthesis of amino acids;Glucosinolate biosynthesis;Aminoacyl-tRNA biosynthesis;Phenylalanine, tyrosine and tryptophan biosynthesis;Tryptophan metabolism	1.5937	1.5858	1.1127	0.003111	0.04992	5.1147	5.0198	4.9094	4.42	4.6036	4.497
neg_8227	Taxiphyllin	metab_17223	yes	up	C01855	neg	21401-21-8	310.093	1.84355	M-H	C14H17NO7	-	42.9	HMDB0030704	-	-	-	-	-	Organic oxygen compounds	Organooxygen compounds	Carbohydrates and carbohydrate conjugates	-	42.9	-	-	1.3813	1.3765	1.112	0.009464	0.09126	3.8128	3.9808	4.0297	3.6149	3.4378	3.578
neg_8290	3-Methoxy-4,5-methylenedioxybenzoic acid	metab_17286	yes	up	-	neg	526-34-1	241.035	1.77495	M+FA-H	C9H8O5	-	40.3	HMDB0030800	-	-	-	-	-	Benzenoids	Benzene and substituted derivatives	Benzoic acids and derivatives	-	40.3	-	-	1.8901	1.8795	1.2447	0.000794	0.02236	3.4099	3.6488	3.6068	2.8495	2.8943	2.8234
neg_8404	D-Pantothenic acid	metab_17399	yes	down	C00864	neg	79-83-4	218.103	1.66145	M-H	C9H17NO5	93.6	-	HMDB0250782;HMDB0000210	Vitamins and cofactors	Vitamins	map01100;map01110;map00770;map00410;map01240	Metabolism;Metabolism;Metabolism;Metabolism;Metabolism	Global and overview maps;Global and overview maps;Metabolism of cofactors and vitamins;Metabolism of other amino acids;Global and overview maps	Organic acids and derivatives	Carboxylic acids and derivatives	Amino acids, peptides, and analogues	93.6	-	Metabolic pathways;Biosynthesis of secondary metabolites;Pantothenate and CoA biosynthesis;beta-Alanine metabolism;Biosynthesis of cofactors	Metabolic pathways;Biosynthesis of secondary metabolites;Pantothenate and CoA biosynthesis;beta-Alanine metabolism;Biosynthesis of cofactors	1.1913	1.1859	0.9476	0.004239	0.0577	5.3008	5.152	5.1634	5.5141	5.484	5.4797
neg_8480	6-(2,4-dihydroxy-5-methoxybenzoyloxy)-3,4,5-trihydroxyoxane-2-carboxylic acid	metab_17475	yes	down	-	neg	-	359.062	1.61653	M-H	C14H16O11	-	56.4	-	-	-	-	-	-	-	-	-	-	56.4	-	-	2.7843	2.773	0.5988	0.0007722	0.02184	2.5564	2.2741	1.985	3.8017	3.8061	3.7739
neg_8518	Beta-D-Glucopyranosyl anthranilate	metab_17513	yes	up	-	neg	-	344.099	1.57105	M+FA-H	C13H17NO7	-	57.7	HMDB0041517	-	-	-	-	-	Organic oxygen compounds	Organooxygen compounds	Carbohydrates and carbohydrate conjugates	-	57.7	-	-	1.3327	1.3329	1.1114	0.0416	0.1928	3.9839	4.1152	4.2589	3.6173	3.5673	3.9341
neg_8557	Casuarine 6-alpha-D-glucoside	metab_17552	yes	up	-	neg	186795-20-0	366.14	1.5037	M-H	C14H25NO10	-	40.6	HMDB0031999	-	-	-	-	-	Organic oxygen compounds	Organooxygen compounds	Carbohydrates and carbohydrate conjugates	-	40.6	-	-	1.3586	1.3508	1.09	0.001671	0.03448	4.3701	4.4467	4.4421	4.1038	3.9717	4.0884
neg_8564	Guanosine	metab_17559	yes	up	C00387	neg	118-00-3	282.084	1.48172	M-H	C10H13N5O5	96.7	-	PW_C000087;HMDB0000133	Nucleic acids	Nucleosides	map01100;map02010;map00230	Metabolism;Environmental Information Processing;Metabolism	Global and overview maps;Membrane transport;Nucleotide metabolism	Nucleosides, nucleotides, and analogues	Purine nucleosides	Not Available	96.7	-	Metabolic pathways;ABC transporters;Purine metabolism	Metabolic pathways;ABC transporters;Purine metabolism	1.1273	1.1253	1.0697	0.03868	0.187	4.5244	4.3967	4.5709	4.1734	4.0805	4.3579
neg_8565	4-Acetyl-2(3H)-benzoxazolone	metab_17560	yes	down	-	neg	70735-79-4	222.04	1.48172	M+FA-H	C9H7NO3	-	69.2	HMDB0040612	-	-	-	-	-	Organoheterocyclic compounds	Benzoxazoles	Benzoxazolones	-	69.2	-	-	1.1442	1.1379	0.9385	0.0305	0.1651	4.6041	4.3292	4.4335	4.6737	4.7639	4.8053
neg_8573	Lactosamine	metab_17568	yes	down	C00203	neg	13000-25-4	322.114	1.45982	M-H2O-H	C12H23NO10	-	69.1	HMDB0006591	-	-	map01100;map00520	Metabolism;Metabolism	Global and overview maps;Carbohydrate metabolism	Lipids and lipid-like molecules	Fatty Acyls	Fatty acyl glycosides	-	69.1	Metabolic pathways;Amino sugar and nucleotide sugar metabolism	Metabolic pathways;Amino sugar and nucleotide sugar metabolism	2.7359	2.7202	0.709	1.825e-05	0.002434	3.4303	3.4928	3.566	4.9131	4.8629	5.0176
neg_8588	Histidinyl-Isoleucine	metab_17583	yes	up	-	neg	129050-48-2	267.146	1.43808	M-H	C12H20N4O3	-	47.6	HMDB0028888	-	-	-	-	-	Organic acids and derivatives	Carboxylic acids and derivatives	Amino acids, peptides, and analogues	-	47.6	-	-	1.5074	1.4991	1.2484	2.419e-06	0.0008732	2.2065	2.1785	2.1733	1.746	1.7586	1.7491
neg_8656	Arborinine	metab_17650	yes	down	C10643	neg	5489-57-6	306.077	1.18197	M+Na-2H	C16H15NO4	-	32.3	HMDB0030177	-	-	-	-	-	Organoheterocyclic compounds	Quinolines and derivatives	Benzoquinolines	-	32.3	-	-	2.2761	2.2692	0.7461	0.01192	0.1036	2.724	3.3398	3.5104	4.3903	4.1574	4.283
neg_8690	Valyl-Aspartate	metab_17684	yes	up	-	neg	20556-16-5	231.098	1.0313	M-H	C9H16N2O5	-	45.6	HMDB0029123	-	-	-	-	-	Organic acids and derivatives	Carboxylic acids and derivatives	Amino acids, peptides, and analogues	-	45.6	-	-	1.2195	1.2201	1.108	0.03189	0.1689	3.5806	3.3061	3.4207	3.2007	3.1272	2.9763
neg_8691	5-L-Glutamyl-L-alanine	metab_17685	yes	down	C03740	neg	5875-41-2	217.082	1.0313	M-H	C8H14N2O5	58.4	-	HMDB0006248	-	-	map01100;map00480	Metabolism;Metabolism	Global and overview maps;Metabolism of other amino acids	Organic acids and derivatives	Carboxylic acids and derivatives	Amino acids, peptides, and analogues	58.4	-	Metabolic pathways;Glutathione metabolism	Metabolic pathways;Glutathione metabolism	1.2356	1.2231	0.9045	0.01701	0.125	3.1172	2.9267	3.1939	3.4462	3.3922	3.3728
neg_8692	O-Succinyl-L-homoserine	metab_17686	yes	up	C01118	neg	1492-23-5	218.066	1.0313	M-H	C8H13NO6	31	-	HMDB0255868	-	-	map01100;map00270;map01110;map00920;map01230	Metabolism;Metabolism;Metabolism;Metabolism;Metabolism	Global and overview maps;Amino acid metabolism;Global and overview maps;Energy metabolism;Global and overview maps	Organic acids and derivatives	Carboxylic acids and derivatives	Amino acids, peptides, and analogues	31	-	Metabolic pathways;Cysteine and methionine metabolism;Biosynthesis of secondary metabolites;Sulfur metabolism;Biosynthesis of amino acids	Metabolic pathways;Cysteine and methionine metabolism;Biosynthesis of secondary metabolites;Sulfur metabolism;Biosynthesis of amino acids	1.0211	1.0202	1.0528	0.008477	0.08627	4.3042	4.3002	4.4334	4.1129	4.1495	4.1217
neg_8845	6-({[3,4-dihydroxy-4-(hydroxymethyl)oxolan-2-yl]oxy}methyl)oxane-2,3,4,5-tetrol	metab_17839	yes	down	-	neg	-	357.104	0.659333	M+FA-H	C11H20O10	-	48.4	-	-	-	-	-	-	-	-	-	-	48.4	-	-	1.3551	1.3514	0.9126	0.02621	0.1521	4.4171	4.25	4.0876	4.52	4.7107	4.7478
neg_46	(-)-Epicatechin	metab_18184	yes	up	C09727	neg	490-46-0;154-23-4	289.072	2.04542	M+Na-2H, M+Cl, M-H	C15H14O6	92.1	-	HMDB0001871;HMDB0002780	-	-	map01100;map00941;map01110	Metabolism;Metabolism;Metabolism	Global and overview maps;Biosynthesis of other secondary metabolites;Global and overview maps	Phenylpropanoids and polyketides	Flavonoids	Flavans	92.1	-	Metabolic pathways;Flavonoid biosynthesis;Biosynthesis of secondary metabolites	Metabolic pathways;Flavonoid biosynthesis;Biosynthesis of secondary metabolites	4.3749	4.351	3.2774	0.001498	0.03248	5.43	5.4092	5.4641	2.1791	2.1106	0.6839
neg_7965	EPIGALLOCATECHIN	metab_18189	yes	up	C12127;C12136	neg	970-74-1;490-46-0;970-73-0	305.068	2.134	M-H	C15H14O7	32	-	HMDB0302404;HMDB0038361;HMDB0001871;LMPK12020004;HMDB0038365	-	-	map00941;map01110	Metabolism;Metabolism	Biosynthesis of other secondary metabolites;Global and overview maps	Phenylpropanoids and polyketides	Flavonoids	Flavans	32	-	Flavonoid biosynthesis;Biosynthesis of secondary metabolites	Flavonoid biosynthesis;Biosynthesis of secondary metabolites	1.9327	1.923	1.3082	0.00705	0.07788	3.2084	3.2994	3.2728	2.3676	2.3201	2.7878
neg_32	Maltotriose	metab_18194	yes	down	C01835	neg	1109-28-0;6118-87-2	539.138	0.68	M+Cl, M+FA-H, M-H	C18H32O16	71.4	-	HMDB0038852;HMDB0001262	-	-	map02010	Environmental Information Processing	Membrane transport	Organic oxygen compounds	Organooxygen compounds	Carbohydrates and carbohydrate conjugates	71.4	-	ABC transporters	ABC transporters	1.3312	1.3305	0.9348	0.02363	0.1448	5.7449	5.6506	5.4769	6.0674	6.1166	5.8641
neg_6587	Phloretin	metab_18195	yes	up	C00774	neg	7507-89-3;60-82-2	273.077	4.53737	M-H	C15H14O5	55.7	-	LMPK12120525;HMDB0029646;HMDB0003306	-	-	map00941;map01110	Metabolism;Metabolism	Biosynthesis of other secondary metabolites;Global and overview maps	Organic oxygen compounds	Organooxygen compounds	Carbonyl compounds	55.7	-	Flavonoid biosynthesis;Biosynthesis of secondary metabolites	Flavonoid biosynthesis;Biosynthesis of secondary metabolites	2.3853	2.3762	1.6595	0.001782	0.03609	2.5688	2.8743	3.0964	1.711	1.7205	1.7141
